# Supplementary material for: Visible-light-induced [3+2] cycloadditions of donor/donor diazo intermediates with alkenes to achieve (spiro)-pyrazolines and pyrazoles
Source: Royal Society of Chemistry journal article supplement (doi:10.1039/d3sc04188c), 2023-01-01

## Visible-Light-Induced [3+2] Cycloadditions of Donor/Donor Diazo Intermediates with Alkenes to Achieve (Spiro)-Pyrazolines and Pyrazoles

Yu Zhang,<sup>[a]‡</sup> Yanchuan Li,<sup>[b,c]‡</sup> Shaofei Ni,<sup>[d]‡</sup> Jinpeng Li,<sup>[d]</sup> Dingding Xia,<sup>[a]</sup> Xinyu Han,<sup>[a,c]</sup> Jingchuan Lin,<sup>[a,c]</sup> Jinxin Wang,<sup>[c]\*</sup> Shoubhik Das,<sup>[e,f]\*</sup> Wei-Dong Zhang<sup>[a,b,c, g]\*</sup>

[a] Shanghai Frontiers Science Center for Chinese Medicine Chemical Biology, Institute of Interdisciplinary Integrative Medicine Research, Shanghai University of Traditional Chinese Medicine, No. 1200, Cailun Road, Shanghai 201203, China

[b] School of Pharmaceutical Sciences, Zhejiang Chinese Medical University, Hangzhou 310053, China [c] School of Pharmacy, Second Military Medical University, Shanghai 200433, China

[d] Department of Chemistry, Key Laboratory for Preparation and Application of Ordered Structural Materials of Guangdong Province, Shantou University, Shantou 515063, China

[e] Department of Chemistry, University of Antwerp, Antwerp, Belgium.

[f] Department of Chemistry, University of Bayreuth, Bayreuth, Germany.

[g] Institute of Medicinal Plant Development, Chinese Academy of Medical Sciences & Peking Union Medical College, Beijing 100193, China

**E-mail:** [wdzhangy@hotmail.com](mailto:wdzhangy@hotmail.com); [jxwang2013@126.com](mailto:jxwang2013@126.com); [Shoubhik.Das@uni-bayreuth.de](mailto:Shoubhik.Das@uni-bayreuth.de)

|                                                                                  |            |
|----------------------------------------------------------------------------------|------------|
| <b>1. General information</b>                                                    | <b>3</b>   |
| <b>2. Setup for photochemical reactions</b>                                      | <b>6</b>   |
| <b>3. Optimization of reaction conditions</b>                                    | <b>6</b>   |
| <b>4. Procedures of synthesizing products and characterization data</b>          | <b>9</b>   |
| <b>5. Procedures of synthesizing starting material and characterization data</b> | <b>63</b>  |
| <b>6. The applications of the visible-light-induced [3+2] cycloadditions</b>     | <b>93</b>  |
| <b>7. Mechanistic investigations</b>                                             | <b>95</b>  |
| <b>8. DFT calculation</b>                                                        | <b>106</b> |
| <b>9. References</b>                                                             | <b>133</b> |
| <b>10. NMR spectra of products and synthesized substrates</b>                    | <b>135</b> |



## 1. General information

Commercial reagents were used without purification and reactions were run under Ar atmosphere with the exclusion of moisture from reagents using standard techniques for manipulating air-sensitive compounds. All reactions, unless noted, were performed in oven-dried glassware with magnetic stirring under an inert atmosphere of dry argon.

$^1\text{H}$  NMR spectra (500 MHz) and  $^{13}\text{C}$  NMR spectra (126 MHz) were recorded using Bruker Avance 500 spectrometer with  $\text{CDCl}_3$  or  $\text{CD}_3\text{OD}$  as solvent. NMR spectra were calibrated using the solvent residual signals ( $\text{CDCl}_3$ :  $\delta$   $^1\text{H}$  = 7.26,  $\delta$   $^{13}\text{C}$  = 77.16;  $\text{CD}_3\text{OD}$ :  $\delta$   $^1\text{H}$  = 3.34,  $\delta$   $^{13}\text{C}$  = 49.86). The following abbreviations were used to describe peak splitting patterns when appropriate: chemical shift ( $\delta$  ppm), multiplicity (s = singlet, d = doublet, t = triplet, q = quartet, m = multiplet, comp = composite of magnetically non-equivalent protons, dd = doublet of doublets), coupling constants (Hz), integration and assignment.  $^{13}\text{C}$  NMR spectra were acquired with broad-band proton decoupling, therefore the assignment of C, CH,  $\text{CH}_2$  or  $\text{CH}_3$  groups was based on additional HSQC experiments. The assignments of individual NMR signals were based on additional 2D NMR experiments (COSY, NOESY, HSQC, HMBC). High-resolution mass spectra (HRMS) were recorded on an Agilent MSD-Trap-XCT or Q-ToF micro mass spectrometer.

Thin layer chromatography (TLC) was performed using MilliporeSigma glass TLC plates (silica gel 60 coated with  $\text{F}_{254}$ , 250  $\mu\text{m}$ ) and spots were visualized using UV light (254 nm). SiliaFlash® P60 silica gel (particle size: 40-63  $\mu\text{m}$ , pore size: 60 Å) was used for flash column chromatography. A petroleum ether/EtOAc solvent system was used as mobile phase and commercial silica cartridges (12-80 g, Grace®) as stationary phase.

Kessil lamps were purchased from Tansoole, with precise wavelengths (456 nm).

Alpha-tetralone **1a**, Butyl acrylate **1c**, 1,8-Diazabicyclo[5.4.0]undec-7-ene (DBU) were purchased from TCI. Anhydrous THF & 2-MeTHF were purchased from Tansoole. Alkene compounds **61c**, **64c**, **65c**, **66c**, **68c**, **71c**, **93c**, **94c**, **95c**, **96c**, **97c** and **98c** were prepared using reported literature procedures. Other alkene compounds were purchased from Bide Pharm, Tansoole, Fisher, TCI or Energy Chemical and used without further purification. *N*-tosylhydrazones **1b-92b** were prepared using reported procedures.

## *N*-tosylhydrazones included in the manuscript

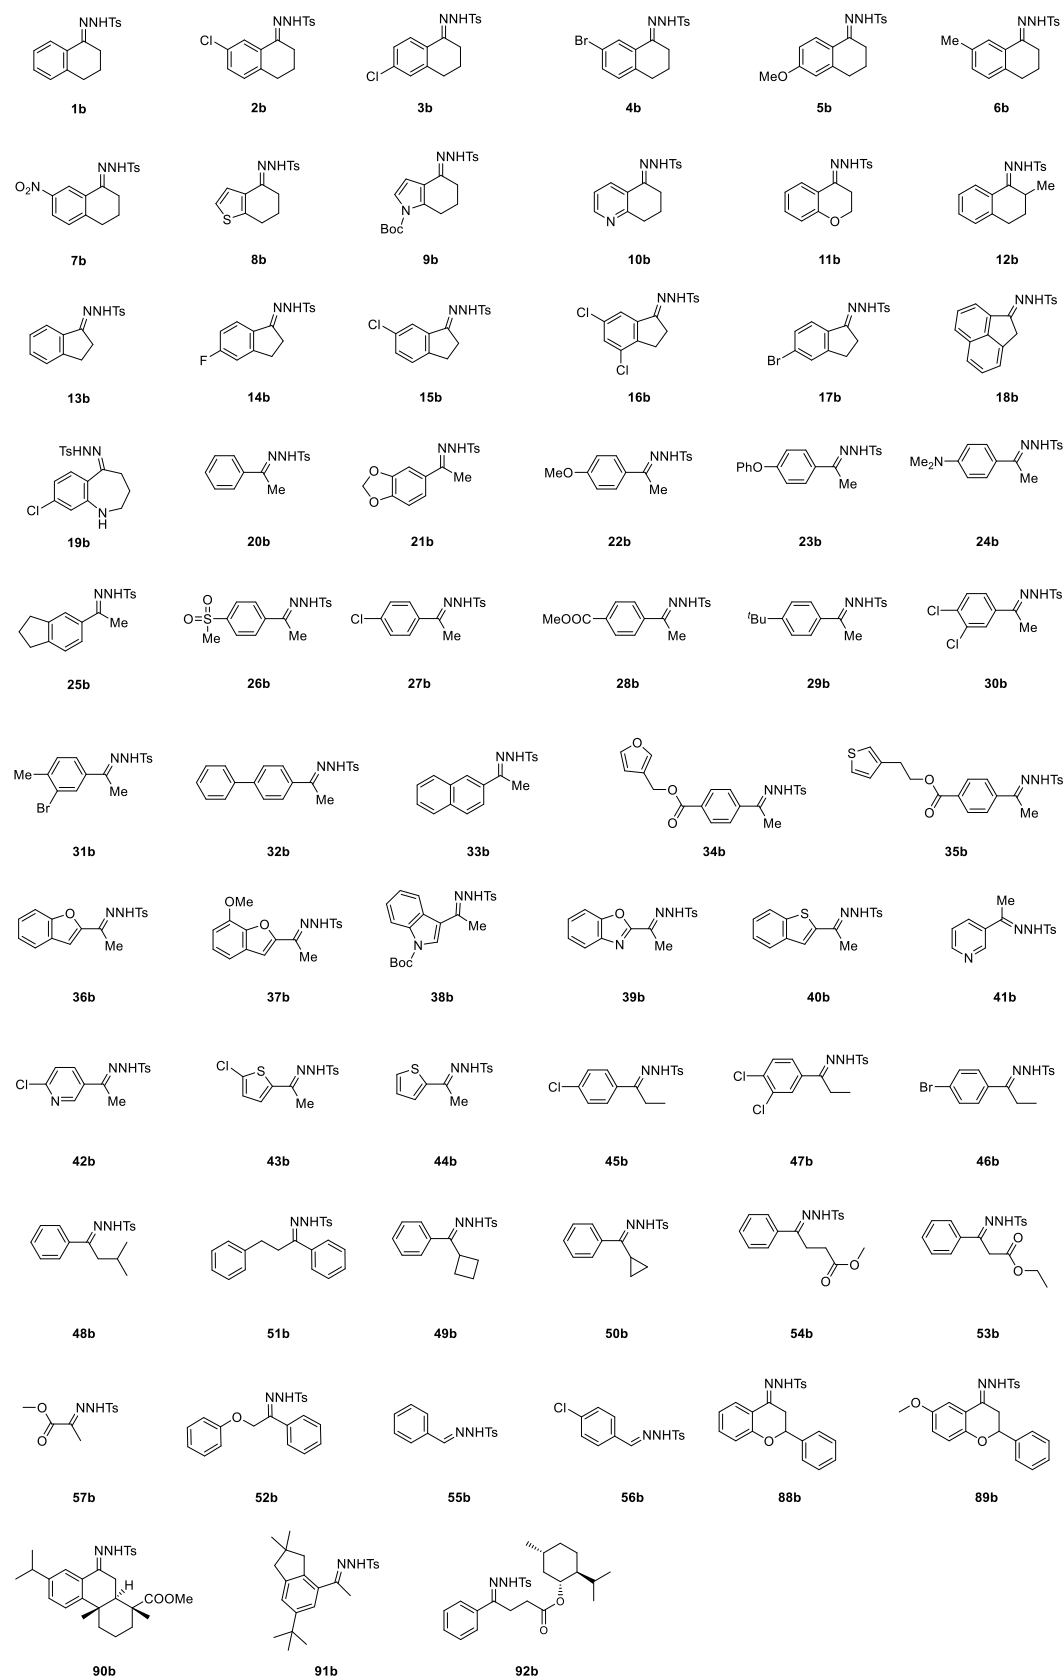

## Alkenes included in the manuscript

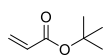

58c

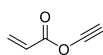

59c

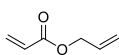

60c

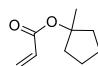

61c

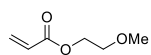

62c

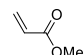

63c

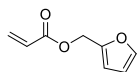

64c

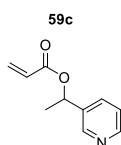

66c

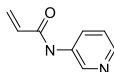

68c

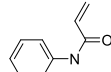

69c

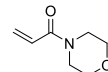

70c

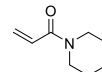

71c

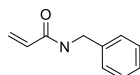

72c

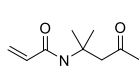

73c

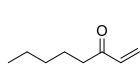

74c

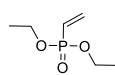

75c

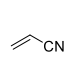

76c

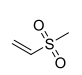

77c

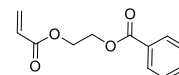

65c

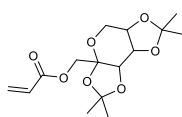

93c

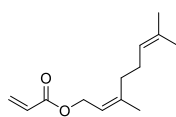

94c

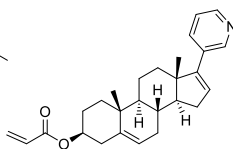

95c

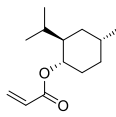

96c

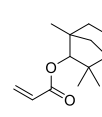

97c

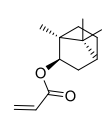

98c

## 2. Setup for photochemical reactions

The reaction setup is depicted in **Figure S1**. The reaction setup consists of 4 commercially available Kessil lamps which were purchased from Tansoole, with precise wavelengths (456 nm), cooling of the setup was performed by two commercially available fans to keep the temperature around 30 °C.

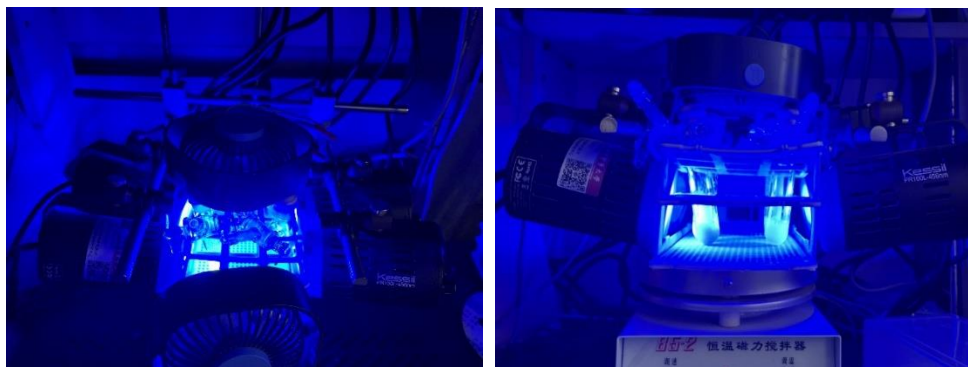

**Figure S1:** Photochemical reaction setup using 456 nm Kessil Lamps.

## 3. Optimization of reaction conditions

**Table S1.** Optimization of synthesizing sipropyrazolines.

C1=CC=C2C(=C1)C(=NNHTs)CC2 + C=CC(=O)OCC >> C1=CC=C2C(=C1)C3C(C2)C(=NNC3C(=O)OCC)CC  
1b + 1c → 1d

| Entry <sup>a</sup> | Changes from standard conditions                       | Yield <sup>b</sup> |
|--------------------|--------------------------------------------------------|--------------------|
| 1                  | None                                                   | 90%                |
| 2                  | DBN instead of DBU                                     | 76%                |
| 3                  | DTHP instead of DBU                                    | 10%                |
| 4                  | Cs <sub>2</sub> CO <sub>3</sub> instead of DBU         | N.D.               |
| 5                  | Et <sub>3</sub> N instead of DBU                       | N.D.               |
| 6                  | THF instead of 2-MeTHF                                 | 89%                |
| 7                  | MeCN instead of 2-MeTHF                                | 50%                |
| 8                  | 2.0 equiv of <b>1c</b> was used                        | 80%                |
| 9                  | Without H <sub>2</sub> O                               | 76%                |
| 10                 | 3.0 equiv PTC <sup>c</sup> instead of H <sub>2</sub> O | 82%                |
| 11                 | In the Dark                                            | N.D.               |
| 12                 | Without base                                           | N.D.               |

<sup>a</sup>Reaction conditions: **1b** (0.2 mmol), butyl acrylate (0.3 mmol, 1.5 equiv.), base (0.6 mmol, 3.0 equiv.), H<sub>2</sub>O (0.6 mmol, 3.0 equiv.), solvent (1.0 mL), irradiation with 40 W blue Kessil lamp ( $\lambda = 456$  nm), r.t., argon atmosphere, 16 h., n.d. = not detected. <sup>b</sup>Yields were determined by <sup>1</sup>H NMR analysis of the crude reaction mixture using 1,3,5-trimethoxybenzene as the internal standard. <sup>c</sup>PTC: tetrabutylammonium bromide.

**Table S2. Screening of bases**
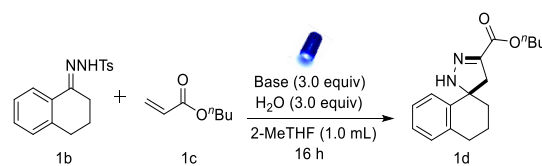

| Entry <sup>a</sup> | Base                            | Yield <sup>b</sup> |
|--------------------|---------------------------------|--------------------|
| 1                  | DBU                             | 90%                |
| 2                  | DBN                             | 76%                |
| 3                  | DTHP                            | 10%                |
| 4                  | Cs <sub>2</sub> CO <sub>3</sub> | N.D.               |
| 5                  | TBD                             | N.D.               |
| 6                  | DIPEA                           | N.D.               |
| 7                  | TMEDA                           | N.D.               |
| 8                  | Et <sub>3</sub> N               | N.D.               |

<sup>a</sup>Reaction conditions: compound **1b** (0.2 mmol, 1.0 equiv), butyl acrylate (0.3 mmol, 1.5 equiv), Base (0.6 mmol, 3.0 equiv), H<sub>2</sub>O (0.6 mmol, 3.0 equiv), 2-MeTHF (1.0 mL), irradiation with 40 W blue Kessil lamp ( $\lambda = 456$  nm), r.t., argon atmosphere, 16 h, n.d. = not detected. <sup>b</sup>Yields were determined by <sup>1</sup>H NMR analysis of the crude reaction mixture using 1,3,5-trimethoxybenzene as the internal standard.

**Table S3. Screening of additive**
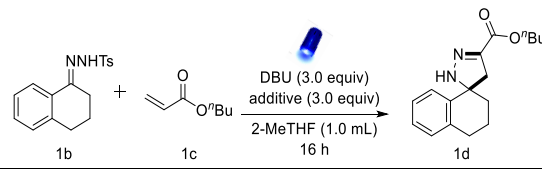

| Entry <sup>a</sup> | additive                             | Yield <sup>b</sup> |
|--------------------|--------------------------------------|--------------------|
| 1                  | Without additive                     | 76%                |
| 2                  | H <sub>2</sub> O                     | 90%                |
| 3                  | pyridine                             | 51%                |
| 4                  | Tetrabutylammonium chloride          | 56%                |
| 5                  | Tetrabutylammonium bromide           | 82%                |
| 6                  | Tetrabutylammonium bromide (10 mol%) | 61%                |

<sup>a</sup>Reaction conditions: compound **1b** (0.2 mmol, 1.0 equiv), butyl acrylate (0.3 mmol, 1.5 equiv), DBU (0.6 mmol, 3.0 equiv), additive (0.6 mmol, 3.0 equiv), 2-MeTHF (1.0 mL), irradiation with 40 W blue Kessil lamp ( $\lambda = 456$  nm), r.t., argon atmosphere, 16 h. <sup>b</sup>Yields were determined by <sup>1</sup>H NMR analysis of the crude reaction mixture using 1,3,5-trimethoxybenzene as the internal standard.

**Table S4. Screening different wavelengths.**

| Entry <sup>a</sup> | Variations               | Yield [%] <sup>b</sup> |
|--------------------|--------------------------|------------------------|
| 1                  | None                     | 90%                    |
| 2                  | 390 nm instead of 456 nm | 85%                    |
| 3                  | 405 nm instead of 456 nm | 77%                    |
| 4                  | 427 nm instead of 456 nm | 66%                    |

<sup>a</sup>Reaction conditions: compound **1b** (0.2 mmol, 1.0 equiv), butyl acrylate (0.3 mmol, 1.5 equiv), DBU (0.6 mmol, 3.0 equiv), H<sub>2</sub>O (0.6 mmol, 3.0 equiv), 2-MeTHF (1.0 mL), irradiation with 40 W blue Kessil lamp (456 nm), r.t., argon atmosphere, 16 h. <sup>b</sup>Yields were determined by <sup>1</sup>H NMR analysis of the crude reaction mixture using 1,3,5-trimethoxybenzene as the internal standard.

**Table S5. Optimization of synthesizing pyrazoles.**

| Entry <sup>a</sup> | Changes from standard conditions | Yield <sup>b</sup> |
|--------------------|----------------------------------|--------------------|
| 1                  | None                             | 65%                |
| 2                  | O <sub>2</sub> instead of Ar     | 56%                |
| 3                  | 3.0 equiv of DDQ was added       | 36%                |
| 4                  | 3.0 equiv of NaOH was added      | 53%                |
| 5                  | 10 h instead of 16 h             | 54%                |
| 6                  | 24 h instead of 16 h             | 58%                |

<sup>a</sup>Reaction conditions: <sup>[a]</sup>Reaction conditions: compound **b** (0.2 mmol, 1.0 equiv), butyl acrylate (0.3 mmol, 1.5 equiv), DBU (1.0 mmol, 5.0 equiv), H<sub>2</sub>O (0.6 mmol, 3.0 equiv), 2-MeTHF (1.0 mL), irradiation with 40 W blue Kessil lamp ( $\lambda$  = 456 nm), r.t., argon atmosphere, 16 h. <sup>b</sup>Yields were determined by <sup>1</sup>H NMR analysis of the crude reaction mixture using 1,3,5-trimethoxybenzene as the internal standard.

#### 4. Procedures of synthesizing products and characterization data

##### General procedure A of synthesizing (spiro)-pyrazolines

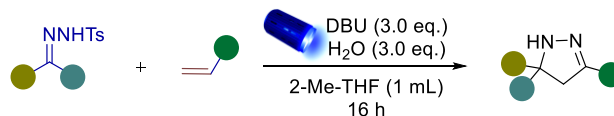

A dry 5 mL Schlenk tube containing a stirring bar was charged with 0.2 mmol of *N*-tosylhydrazone (1.0 equiv), 0.3 mmol of alkene (1.5 equiv), 0.6 mmol of DBU (3.0 equiv) and 0.6 mmol (3.0 equiv) of H<sub>2</sub>O. After purging the flask for three times under vacuum and three times under argon, it was charged with 2-Methyltetrahydrofuran (1.0 mL). The reaction was kept for 16 h under 40 W Kessil lamp reaction setup (the progress can be monitored *via* TLC). Then, the resulting mixture underwent an aqueous workup (using distilled water; or brine in case of slurry phase separation) and was extracted three times with dichloromethane<sup>[1]</sup>. The combined organic layers were dried over anhydrous Na<sub>2</sub>SO<sub>4</sub>, filtered and concentrated *in vacuo*. Products were purified *via* flash column chromatography with ethyl acetate and hexane as solvents.

##### General procedure B of synthesizing pyrazoles

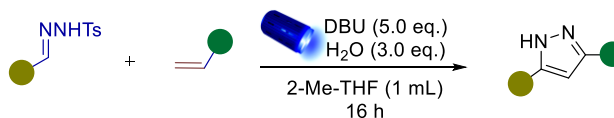

A dry 5 mL Schlenk tube containing a stirring bar was charged with 0.2 mmol of *N*-tosylhydrazone (1.0 equiv), 0.3 mmol of alkene (1.5 equiv), 1.0 mmol of DBU (5.0 equiv) and 0.6 mmol (3.0 equiv) of H<sub>2</sub>O. After purging the flask for three times under vacuum and three times under argon, it was charged with 2-Methyltetrahydrofuran (1.0 mL). The reaction was kept for 16 h under 40 W Kessil lamp reaction setup (the progress can be monitored *via* TLC). Then, the resulting mixture underwent an aqueous workup (using distilled water; or brine in case of slurry phase separation) and was extracted three times with dichloromethane. The combined organic layers were dried over anhydrous Na<sub>2</sub>SO<sub>4</sub>, filtered and concentrated *in vacuo*. Products were purified *via* flash column chromatography with ethyl acetate and hexane as solvents.

### Characterization data of the pyrazolines and pyrazoles

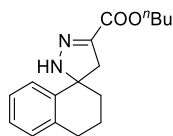

**Butyl 2',3,4,4'-tetrahydro-2H-spiro[naphthalene-1,3'-pyrazole]-5'-carboxylate (1d):** Prepared according to the general procedure A, the title compound was prepared from *N*-tosylhydrazone (**1b**) (62.8 mg, 0.2 mmol, 1.0 equiv) and butyl acrylate (**1c**) (44.0  $\mu$ l, 0.3 mmol, 1.5 equiv). Spiropyrazoline **1d** was obtained after column chromatography (hexane: EtOAc, 3:1) as a colourless oil (51.5 mg, 0.18 mmol, 90%).

**$^1\text{H}$  NMR (500 MHz,  $\text{CDCl}_3$ )**  $\delta$  7.42–7.25 (m, 1H), 7.17–7.07 (m, 2H), 7.07–6.95 (m, 1H), 6.27 (s, 1H), 4.24–4.11 (m, 2H), 3.06 (s, 2H), 2.74 (d,  $J$  = 5.9 Hz, 2H), 1.99 (dd,  $J$  = 10.8, 7.1 Hz, 1H), 1.86–1.74 (m, 3H), 1.64 (dt,  $J$  = 14.6, 6.9 Hz, 2H), 1.36 (dq,  $J$  = 14.8, 7.4 Hz, 2H), 0.88 (t,  $J$  = 7.4 Hz, 3H).

**$^{13}\text{C}$  NMR (126 MHz,  $\text{CDCl}_3$ )**  $\delta$  162.6, 139.8, 138.6, 136.0, 128.5, 127.1, 126.4, 126.3, 68.4, 64.5, 46.7, 35.7, 30.3, 28.7, 19.5, 18.7, 13.3.

**HRMS (ESI+),  $m/z$**  calculated for  $\text{C}_{17}\text{H}_{22}\text{N}_2\text{O}_2$  [ $\text{M} + \text{Na}$ ] $^+$ : 309.1573, found: 309.1565.

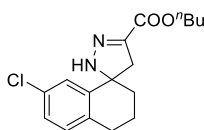

**Butyl 7-chloro-2',3,4,4'-tetrahydro-2H-spiro[naphthalene-1,3'-pyrazole]-5'-carboxylate (2d):** Prepared according to the general procedure A, the title compound was prepared from *N*-tosylhydrazone (**2b**) (69.7 mg, 0.2 mmol, 1.0 equiv) and butyl acrylate (**1c**) (44.0  $\mu$ l, 0.3 mmol, 1.5 equiv). Spiropyrazoline **2d** was obtained after column chromatography (hexane: EtOAc, 3:1) as a colourless oil (51.3 mg, 0.16 mmol, 80%).

**$^1\text{H}$  NMR (500 MHz,  $\text{CD}_3\text{OD}$ )**  $\delta$  7.31 (d,  $J$  = 2.2 Hz, 1H), 7.13 (dd,  $J$  = 8.2, 2.2 Hz, 1H), 7.06 (d,  $J$  = 8.3 Hz, 1H), 4.20 (t,  $J$  = 6.7 Hz, 2H), 3.13 (d,  $J$  = 17.5 Hz, 1H), 2.96 (d,  $J$  = 17.5 Hz, 1H), 2.77 (t,  $J$  = 5.7 Hz, 2H), 2.02–1.80 (m, 4H), 1.72–1.62 (m, 2H), 1.42 (dq,  $J$  = 14.8, 7.4 Hz, 2H), 0.96 (t,  $J$  = 7.4 Hz, 3H).

**$^{13}\text{C}$  NMR (126 MHz,  $\text{CD}_3\text{OD}$ )**  $\delta$  164.7, 144.1, 137.6, 136.5, 133.0, 131.7, 128.5, 127.8, 69.8, 65.7, 47.9, 36.2, 31.9, 29.6, 20.7, 20.3, 14.2.

**HRMS (ESI+),  $m/z$ :** calculated for  $\text{C}_{17}\text{H}_{21}\text{ClN}_2\text{O}_2$  [ $\text{M} + \text{H}$ ] $^+$ : 321.1364, found: 321.1388.



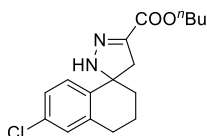

**Butyl 6-chloro-2',3,4,4'-tetrahydro-2H-spiro[naphthalene-1,3'-pyrazole]-5'-carboxylate (3d):**

Prepared according to the general procedure A, the title compound was prepared from *N*-tosylhydrazone (**3b**) (69.7 mg, 0.2 mmol, 1.0 equiv) and butyl acrylate (**1c**) (44.0  $\mu$ l, 0.3 mmol, 1.5 equiv). Spiropyrazoline **3d** was obtained after column chromatography (hexane: EtOAc, 3:1) as a colourless oil (52.6 mg, 0.164 mmol, 82%)

**<sup>1</sup>H NMR (500 MHz, CDCl<sub>3</sub>)**  $\delta$  7.34 (d,  $J$  = 8.4 Hz, 1H), 7.13 (dd,  $J$  = 8.5, 2.3 Hz, 1H), 7.10–6.99 (m, 1H), 6.31 (s, 1H), 4.23 (td,  $J$  = 6.8, 1.6 Hz, 2H), 3.13 (d,  $J$  = 17.7 Hz, 1H), 3.04 (d,  $J$  = 17.6 Hz, 1H), 2.77 (t,  $J$  = 6.2 Hz, 2H), 2.05 (dd,  $J$  = 11.2, 5.3 Hz, 1H), 1.93–1.76 (m, 3H), 1.70 (dt,  $J$  = 14.7, 6.8 Hz, 2H), 1.41 (h,  $J$  = 7.4 Hz, 2H), 0.94 (t,  $J$  = 7.4 Hz, 3H).

**<sup>13</sup>C NMR (126 MHz, CDCl<sub>3</sub>)**  $\delta$  162.4, 138.7, 138.3, 137.9, 132.7, 128.1, 128.0, 126.4, 68.0, 64.5, 46.7, 35.3, 30.2, 28.6, 19.2, 18.7, 13.3.

**HRMS (ESI<sup>+</sup>),  $m/z$ :** calculated for C<sub>17</sub>H<sub>21</sub>ClN<sub>2</sub>O<sub>2</sub> [M + H]<sup>+</sup>: 321.1364, found: 321.1350.

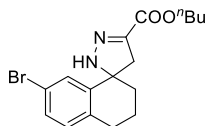

**Butyl 7-bromo-2',3,4,4'-tetrahydro-2H-spiro[naphthalene-1,3'-pyrazole]-5'-carboxylate (4d):**

Prepared according to the general procedure A, the title compound was prepared from *N*-tosylhydrazone (**4b**) (78.4 mg, 0.2 mmol, 1.0 equiv) and butyl acrylate (**1c**) (44.0  $\mu$ l, 0.3 mmol, 1.5 equiv). Spiropyrazoline **4d** was obtained after column chromatography (hexane: EtOAc, 3:1) as a colourless oil (59.2 mg, 0.162 mmol, 81%)

**<sup>1</sup>H NMR (500 MHz, CD<sub>3</sub>OD)**  $\delta$  7.46 (d,  $J$  = 2.2 Hz, 1H), 7.28 (dd,  $J$  = 8.2, 2.2 Hz, 1H), 7.05–6.96 (m, 1H), 4.22 (t,  $J$  = 6.7 Hz, 2H), 3.14 (d,  $J$  = 17.5 Hz, 1H), 2.97 (d,  $J$  = 17.5 Hz, 1H), 2.76 (d,  $J$  = 4.7 Hz, 2H), 2.03–1.79 (m, 4H), 1.69 (dt,  $J$  = 14.5, 6.7 Hz, 2H), 1.43 (dq,  $J$  = 14.8, 7.4 Hz, 2H), 0.96 (t,  $J$  = 7.4 Hz, 3H).

**<sup>13</sup>C NMR (126 MHz, CD<sub>3</sub>OD)**  $\delta$  162.8, 142.5, 135.7, 135.1, 130.1, 129.5, 128.9, 118.9, 67.9, 63.9, 46.0, 34.3, 30.0, 27.7, 18.8, 18.3, 12.2.

**HRMS (ESI<sup>+</sup>),  $m/z$ :** calculated for C<sub>17</sub>H<sub>21</sub>BrN<sub>2</sub>O<sub>2</sub> [M + Na]<sup>+</sup>: 387.0679, found: 387.0703.

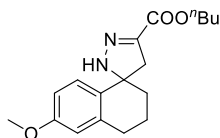

**Butyl 6-methoxy-2',3,4,4'-tetrahydro-2H-spiro[naphthalene-1,3'-pyrazole]-5'-carboxylate (5d):**

Prepared according to the general procedure A, the title compound was prepared from *N*-tosylhydrazone (**5b**) (68.9 mg, 0.2 mmol, 1.0 equiv) and butyl acrylate (**1c**) (44.0  $\mu$ l, 0.3 mmol, 1.5 equiv). Spiropyrazoline **5d** was obtained after column chromatography (hexane: EtOAc, 3:1) as a colourless oil (39.2 mg, 0.124 mmol, 62%)

**<sup>1</sup>H NMR (500 MHz, CD<sub>3</sub>OD)**  $\delta$  7.22 (d,  $J$  = 8.7 Hz, 1H), 6.73 (d,  $J$  = 10.6 Hz, 1H), 6.60 (d,  $J$  = 1.9 Hz, 1H), 4.20 (t,  $J$  = 6.7 Hz, 2H), 3.73 (s, 3H), 3.07 (d,  $J$  = 17.4 Hz, 1H), 2.98 (d,  $J$  = 17.4 Hz, 1H), 2.77 (d,  $J$  = 10.4 Hz, 2H), 2.02 – 1.79 (m, 4H), 1.67 (p,  $J$  = 6.9 Hz, 2H), 1.42 (m, 2H), 0.96 (t,  $J$  = 7.4 Hz, 3H).

**<sup>13</sup>C NMR (126 MHz, CD<sub>3</sub>OD)**  $\delta$  163.0, 158.3, 137.2, 135.5, 132.2, 127.3, 112.2, 112.1, 67.8, 63.7, 53.7, 45.8, 35.4, 30.0, 28.8, 19.2, 18.3, 12.2.

**HRMS (ESI<sup>+</sup>),  $m/z$ :** calculated for C<sub>18</sub>H<sub>24</sub>N<sub>2</sub>O<sub>3</sub> [M + Na]<sup>+</sup>: 339.1679, found: 339.1705.

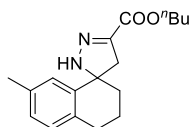

**Butyl 7-methyl-2',3,4,4'-tetrahydro-2H-spiro[naphthalene-1,3'-pyrazole]-5'-carboxylate (6d):**

Prepared according to the general procedure A, the title compound was prepared from *N*-tosylhydrazone (**6b**) (65.6 mg, 0.2 mmol, 1.0 equiv) and butyl acrylate (**1c**) (44.0  $\mu$ l, 0.3 mmol, 1.5 equiv). Spiropyrazoline **6d** was obtained after column chromatography (hexane: EtOAc, 3:1) as a colourless oil (45.6 mg, 0.152 mmol, 76%).

**<sup>1</sup>H NMR (500 MHz, CD<sub>3</sub>OD)**  $\delta$  7.12 (d,  $J$  = 1.6 Hz, 1H), 7.03 – 6.88 (m, 2H), 4.20 (t,  $J$  = 6.6 Hz, 2H), 3.09 (d,  $J$  = 17.4 Hz, 1H), 2.99 (d,  $J$  = 17.4 Hz, 1H), 2.74 (s, 2H), 2.25 (s, 3H), 2.06–1.73 (m, 4H), 1.75–1.61 (m, 2H), 1.52–1.34 (m, 2H), 0.96 (t,  $J$  = 7.4 Hz, 3H).

**<sup>13</sup>C NMR (126 MHz, CD<sub>3</sub>OD)**  $\delta$  164.9, 141.7, 137.2, 137.1, 134.6, 129.9, 129.3, 128.2, 69.9, 65.6, 47.9, 37.1, 31.9, 29.9, 21.3, 21.1, 20.2, 14.1.

**HRMS (ESI<sup>+</sup>),  $m/z$ :** calculated for C<sub>18</sub>H<sub>25</sub>N<sub>2</sub>O<sub>2</sub> [M + H]<sup>+</sup>: 301.1911, found: 301.1882.

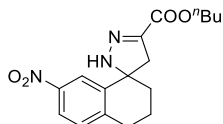

**Butyl 7-nitro-2',3,4,4'-tetrahydro-2H-spiro[naphthalene-1,3'-pyrazole]-5'-carboxylate (7d):**

Prepared according to the general procedure A, the title compound was prepared from *N*-tosylhydrazone (**7b**) (70.8 mg, 0.2 mmol, 1.0 equiv) and butyl acrylate (**1c**) (44.0  $\mu$ l, 0.3 mmol, 1.5 equiv). Spiropyrazoline **7d** was obtained after column chromatography (hexane: EtOAc, 3:1) as a colourless oil (60.9 mg, 0.194 mmol, 97%)

**<sup>1</sup>H NMR (500 MHz, CD<sub>3</sub>OD)**  $\delta$  8.24 (d,  $J$  = 2.4 Hz, 1H), 8.01 (dd,  $J$  = 8.5, 2.4 Hz, 1H), 7.34 (dd,  $J$  = 8.5, 1.0 Hz, 1H), 4.23 (t,  $J$  = 6.7 Hz, 2H), 3.21 (d,  $J$  = 17.6 Hz, 1H), 3.02 (d,  $J$  = 17.6 Hz, 1H), 2.93 (q,  $J$  = 8.1, 6.4 Hz, 2H), 2.11–1.86 (m, 4H), 1.69 (dt,  $J$  = 14.5, 6.7 Hz, 2H), 1.44 (m, 2H), 0.96 (t,  $J$  = 7.4 Hz, 3H).

**<sup>13</sup>C NMR (126 MHz, CD<sub>3</sub>OD)**  $\delta$  164.5, 148.1, 145.8, 143.9, 138.1, 131.4, 123.2, 122.9, 69.8, 65.8, 47.9, 35.7, 31.9, 30.2, 20.3, 20.2, 14.1.

**HRMS (ESI<sup>+</sup>),  $m/z$ :** calculated for C<sub>17</sub>H<sub>22</sub>N<sub>3</sub>O<sub>4</sub> [M + H]<sup>+</sup>: 332.1605, found: 332.1588.

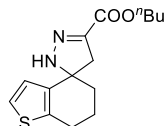

**Butyl 2',4',6,7-tetrahydro-5H-spiro[benzo[b]thiophene-4,3'-pyrazole]-5'-carboxylate (8d):**

Prepared according to the general procedure A, the title compound was prepared from *N*-tosylhydrazone (**8b**) (64.0 mg, 0.2 mmol, 1.0 equiv) and butyl acrylate (**1c**) (44.0  $\mu$ l, 0.3 mmol, 1.5 equiv). Spiropyrazoline **8d** was obtained after column chromatography (hexane: EtOAc, 3:1) as a colourless oil (38.0 mg, 0.13 mmol, 65%)

**<sup>1</sup>H NMR (500 MHz, CD<sub>3</sub>OD)**  $\delta$  7.14 (d,  $J$  = 5.3 Hz, 1H), 6.88 (d,  $J$  = 5.3 Hz, 1H), 4.22 (t,  $J$  = 6.7 Hz, 2H), 3.06 (d,  $J$  = 17.3 Hz, 1H), 2.99 (d,  $J$  = 17.3 Hz, 1H), 2.79 (d,  $J$  = 9.0 Hz, 2H), 2.07–1.83 (m, 4H), 1.75–1.62 (m, 2H), 1.43 (m, 2H), 0.97 (t,  $J$  = 7.4 Hz, 3H).

**<sup>13</sup>C NMR (126 MHz, CD<sub>3</sub>OD)**  $\delta$  162.8, 138.0, 137.3, 137.1, 124.1, 122.2, 66.4, 63.8, 43.6, 35.0, 30.0, 23.7, 20.3, 18.3, 12.2.

**HRMS (ESI<sup>+</sup>),  $m/z$ :** calculated for C<sub>15</sub>H<sub>20</sub>N<sub>2</sub>O<sub>2</sub>S [M + H]<sup>+</sup>: 293.1318, found: 293.1289.

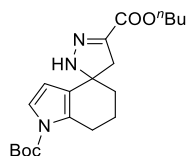

**1-(tert-butyl) 5'-butyl 2',4',6,7-tetrahydrospiro[indole-4,3'-pyrazole]-1,5'(5H)-dicarboxylate (9d):**

Prepared according to the general procedure A, the title compound was prepared from *N*-tosylhydrazone (**9b**) (80.6 mg, 0.2 mmol, 1.0 equiv) and butyl acrylate (**1c**) (44.0  $\mu$ l, 0.3 mmol, 1.5 equiv). Spiropyrazoline **9d** was obtained after column chromatography (hexane: EtOAc, 3:1) as a colourless oil (55.6 mg, 0.148 mmol, 74%)

**<sup>1</sup>H NMR (500 MHz, CD<sub>3</sub>OD)**  $\delta$  7.16 (s, 1H), 6.12 (s, 1H), 4.25 (t,  $J$  = 6.6 Hz, 2H), 3.06 (d,  $J$  = 17.1 Hz, 1H), 2.95 (d,  $J$  = 17.2 Hz, 1H), 2.87 (d,  $J$  = 11.0 Hz, 2H), 2.05–1.81 (m, 4H), 1.73 (dt,  $J$  = 14.5, 6.7 Hz, 2H), 1.62 (s, 9H), 1.53–1.42 (m, 2H), 1.01 (t,  $J$  = 7.4 Hz, 3H).

**<sup>13</sup>C NMR (126 MHz, CD<sub>3</sub>OD)**  $\delta$  164.8, 150.9, 139.5, 131.7, 126.9, 121.4, 109.1, 84.8, 67.2, 65.6, 44.7, 36.5, 31.9, 28.2, 25.4, 21.5, 20.2, 14.1.

**HRMS (ESI<sup>+</sup>),  $m/z$ :** calculated for C<sub>20</sub>H<sub>29</sub>N<sub>3</sub>O<sub>4</sub> [M + H]<sup>+</sup>: 376.2231, found: 376.2258.

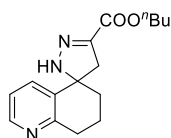

**Butyl 2,4,7,8'-tetrahydro-6'H-spiro[pyrazole-3,5'-quinoline]-5-carboxylate (10d):** Prepared according to the general procedure A, the title compound was prepared from *N*-tosylhydrazone (**10b**) (63.0 mg, 0.2 mmol, 1.0 equiv) and butyl acrylate (**1c**) (44.0  $\mu$ l, 0.3 mmol, 1.5 equiv). Spiropyrazoline **10d** was obtained after column chromatography (hexane: EtOAc, 3:1) as a colourless oil (39.1 mg, 0.136 mmol, 68%)

**<sup>1</sup>H NMR (500 MHz, CD<sub>3</sub>OD)**  $\delta$  8.34 (dd,  $J$  = 4.8, 1.6 Hz, 1H), 7.84 (dd,  $J$  = 8.0, 1.6 Hz, 1H), 7.28 (dd,  $J$  = 8.0, 4.8 Hz, 1H), 4.21 (t,  $J$  = 6.6 Hz, 2H), 3.18 (d,  $J$  = 17.5 Hz, 1H), 3.03 (d,  $J$  = 17.5 Hz, 1H), 2.94 (t,  $J$  = 6.5 Hz, 2H), 2.09–1.84 (m, 4H), 1.68 (dt,  $J$  = 14.6, 6.7 Hz, 2H), 1.43 (dq,  $J$  = 14.7, 7.4 Hz, 2H), 0.96 (t,  $J$  = 7.4 Hz, 3H).

**<sup>13</sup>C NMR (126 MHz, CD<sub>3</sub>OD)**  $\delta$  162.7, 155.3, 147.0, 136.6, 136.2, 135.5, 121.7, 67.7, 63.9, 45.7, 33.8, 30.8, 30.0, 18.3, 18.3, 12.2.

**HRMS (ESI<sup>+</sup>),  $m/z$ :** calculated for C<sub>16</sub>H<sub>21</sub>N<sub>3</sub>O<sub>2</sub> [M + Na]<sup>+</sup>: 310.1526, found: 310.1491.

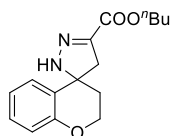

**Butyl 2',4'-dihydrospiro[chromane-4,3'-pyrazole]-5'-carboxylate (11d):** Prepared according to the general procedure A, the title compound was prepared from *N*-tosylhydrazone (**11b**) (63.2mg, 0.2 mmol, 1.0 equiv) and butyl acrylate (**1c**) (44.0  $\mu$ l, 0.3 mmol, 1.5 equiv). Spiropyrazoline **11d** was obtained after column chromatography (hexane: EtOAc, 3:1) as a colourless oil (52.9 mg, 0.18 mmol, 90%)

**<sup>1</sup>H NMR (500 MHz, CD<sub>3</sub>OD)**  $\delta$  7.29 (dd,  $J$  = 7.9, 1.7 Hz, 1H), 7.11 (ddd,  $J$  = 8.3, 7.2, 1.7 Hz, 1H), 6.87 (ddd,  $J$  = 7.8, 7.2, 1.2 Hz, 1H), 6.74 (dd,  $J$  = 8.2, 1.2 Hz, 1H), 4.33–4.12 (m, 4H), 3.16 (d,  $J$  = 17.5 Hz, 1H), 3.07 (d,  $J$  = 17.5 Hz, 1H), 2.12–2.04 (m, 2H), 1.70–1.62 (m, 2H), 1.46–1.38 (m, 2H), 0.95 (t,  $J$  = 7.4 Hz, 3H).

**<sup>13</sup>C NMR (126 MHz, CD<sub>3</sub>OD)**  $\delta$  164.6, 155.5, 138.4, 130.2, 128.4, 127.7, 122.1, 118.0, 66.0, 65.8, 64.6, 47.4, 35.7, 31.9, 20.3, 14.3.

**HRMS (ESI<sup>+</sup>),  $m/z$ :** calculated for C<sub>16</sub>H<sub>20</sub>N<sub>2</sub>O<sub>3</sub> [M + H]<sup>+</sup>: 289.1547, found: 289.1589.

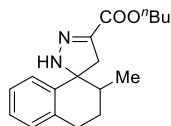

**Butyl 2-methyl-2',3,4,4'-tetrahydro-2H-spiro[naphthalene-1,3'-pyrazole]-5'-carboxylate (12d):** Prepared according to the general procedure A, the title compound was prepared from *N*-tosylhydrazone (**12b**) (65.6 mg, 0.2 mmol, 1.0 equiv) and butyl acrylate (**1c**) (44.0  $\mu$ l, 0.3 mmol, 1.5 equiv). Spiropyrazoline **12d** was obtained after column chromatography (hexane: EtOAc, 3:1) as a colourless oil (32.5 mg, 0.108 mmol, 54%, dr = 1:1).

**<sup>1</sup>H NMR (500 MHz, CD<sub>3</sub>OD)**  $\delta$  7.25–7.12 (m, 3H), 7.08 (d,  $J$  = 8.5 Hz, 1H), 4.20 (td,  $J$  = 6.6, 4.9 Hz, 2H), 3.22–3.20 (m, 1H), 2.91–2.75 (m, 2H), 2.69 (d,  $J$  = 17.9 Hz, 1H), 2.03–1.82 (m, 2H), 1.78–1.61 (m, 3H), 1.49–1.37 (m, 2H), 1.05–0.92 (m, 6H).

**<sup>13</sup>C NMR (126 MHz, CD<sub>3</sub>OD)**  $\delta$  164.9, 141.9, 137.0, 136.7, 130.0, 129.9, 128.4, 128.2, 128.0, 127.8, 127.7, 127.6, 72.5, 65.6, 47.4, 41.9, 40.7, 39.2, 31.9, 29.7, 28.3, 28.3, 28.0, 20.2, 15.9, 15.2, 14.1.

**HRMS (ESI<sup>+</sup>),  $m/z$ :** calculated for C<sub>18</sub>H<sub>24</sub>N<sub>2</sub>O<sub>2</sub> [M + H]<sup>+</sup>: 301.1911, found: 301.1934.

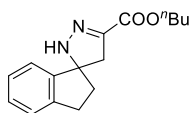

**Butyl 2,2',3,4'-tetrahydrospiro[indene-1,3'-pyrazole]-5'-carboxylate (13d):** Prepared according to the general procedure A, the title compound was prepared from *N*-tosylhydrazone (**13b**) (60.0 mg, 0.2 mmol, 1.0 equiv) and butyl acrylate (**1c**) (44.0  $\mu$ l, 0.3 mmol, 1.5 equiv). Spiropyrzoline **13d** was obtained after column chromatography (hexane: EtOAc, 3:1) as a colourless oil (28.9 mg, 0.106 mmol, 53%).

**$^1\text{H}$  NMR (500 MHz,  $\text{CD}_3\text{OD}$ )**  $\delta$  7.31–7.17 (m, 4H), 4.22 (t,  $J$  = 6.6 Hz, 2H), 3.15 (d,  $J$  = 17.3 Hz, 1H), 3.03 (d,  $J$  = 17.3 Hz, 1H), 3.01–2.84 (m, 2H), 2.37–2.15 (m, 2H), 1.74–1.60 (m, 2H), 1.44 (h,  $J$  = 7.4 Hz, 2H), 0.97 (t,  $J$  = 7.4 Hz, 3H).

**$^{13}\text{C}$  NMR (126 MHz,  $\text{CD}_3\text{OD}$ )**  $\delta$  162.8, 145.1, 142.0, 137.6, 127.5, 126.3, 123.9, 121.8, 76.6, 63.8, 42.5, 39.5, 30.0, 28.3, 18.3, 12.2.

**HRMS (ESI+),  $m/z$ :** calculated for  $\text{C}_{16}\text{H}_{20}\text{N}_2\text{O}_2$   $[\text{M} + \text{H}]^+$ : 273.1598, found: 273.1634.

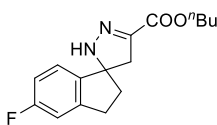

**Butyl 5-fluoro-2,2',3,4'-tetrahydrospiro[indene-1,3'-pyrazole]-5'-carboxylate (14d):** Prepared according to the general procedure A, the title compound was prepared from *N*-tosylhydrazone (**14b**) (63.6 mg, 0.2 mmol, 1.0 equiv) and butyl acrylate (**1c**) (44.0  $\mu$ l, 0.3 mmol, 1.5 equiv). Spiropyrzoline **14d** was obtained after column chromatography (hexane: EtOAc, 3:1) as a colourless oil (32.5 mg, 0.112 mmol, 56%).

**$^1\text{H}$  NMR (500 MHz,  $\text{CD}_3\text{OD}$ )**  $\delta$  7.29 (dd,  $J$  = 8.3, 5.2 Hz, 1H), 7.11–6.85 (m, 2H), 4.25 (t,  $J$  = 6.6 Hz, 2H), 3.24–3.02 (m, 2H), 2.94 (dd,  $J$  = 39.8, 8.0 Hz, 2H), 2.38 (dd,  $J$  = 12.9, 7.9 Hz, 1H), 2.35–2.24 (m, 1H), 1.79–1.63 (m, 2H), 1.57–1.38 (m, 2H), 1.00 (t,  $J$  = 7.4 Hz, 3H).

**$^{13}\text{C}$  NMR (126 MHz, MeOD)**  $\delta$  164.7 (d,  $J$  = 243.9 Hz), 164.6, 146.6 (d,  $J$  = 8.5 Hz), 142.9 (d,  $J$  = 2.5 Hz), 139.6, 125.3 (d,  $J$  = 9.5 Hz), 115.1 (d,  $J$  = 23.3 Hz), 112.5 (d,  $J$  = 22.3 Hz), 77.8, 65.7, 44.4, 41.7, 31.9, 30.2 (d,  $J$  = 2.1 Hz), 20.2, 14.1.

**$^{19}\text{F}$  NMR (282 MHz,  $\text{CD}_3\text{OD}$ )**  $\delta$  -118.37.

**HRMS (ESI+),  $m/z$ :** calculated for  $\text{C}_{16}\text{H}_{19}\text{FN}_2\text{O}_2$   $[\text{M} + \text{H}]^+$ : 291.1503, found: 291.1538.

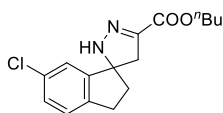

**Butyl 6-chloro-2,2',3,4'-tetrahydrospiro[indene-1,3'-pyrazole]-5'-carboxylate (15d):** Prepared according to the general procedure A, the title compound was prepared from *N*-tosylhydrazone (**15b**) (66.8 mg, 0.2 mmol, 1.0 equiv) and butyl acrylate (**1c**) (44.0  $\mu$ l, 0.3 mmol, 1.5 equiv). Spiropyrzoline **15d** was obtained after column chromatography (hexane: EtOAc, 3:1) as a colourless oil (27.6 mg, 0.09 mmol, 45%).

**<sup>1</sup>H NMR (500 MHz, CD<sub>3</sub>OD)**  $\delta$  7.28–7.17 (m, 3H), 4.22 (t,  $J$  = 6.6 Hz, 2H), 3.17 (d,  $J$  = 17.3 Hz, 1H), 3.00 (d,  $J$  = 17.4 Hz, 1H), 2.98–2.81 (m, 2H), 2.41–2.30 (m, 1H), 2.30–2.18 (m, 1H), 1.68 (dq,  $J$  = 8.5, 6.7 Hz, 2H), 1.49–1.39 (m, 2H), 0.96 (t,  $J$  = 7.4 Hz, 3H).

**<sup>13</sup>C NMR (126 MHz, CD<sub>3</sub>OD)**  $\delta$  164.5, 149.3, 142.7, 139.8, 133.7, 129.5, 127.3, 124.0, 78.3, 65.8, 44.4, 41.5, 31.9, 29.7, 20.2, 14.1.

**HRMS (ESI<sup>+</sup>),  $m/z$ :** calculated for C<sub>16</sub>H<sub>19</sub>ClN<sub>2</sub>O<sub>2</sub> [M + Na]<sup>+</sup>: 329.1027, found: 329.1056.

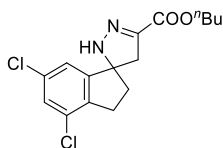

**Butyl 4,6-dichloro-2,2',3,4'-tetrahydrospiro[indene-1,3'-pyrazole]-5'-carboxylate (16d):** Prepared according to the general procedure A, the title compound was prepared from *N*-tosylhydrazone (**16b**) (73.9 mg, 0.2 mmol, 1.0 equiv) and butyl acrylate (**1c**) (44.0  $\mu$ l, 0.3 mmol, 1.5 equiv). Spiropyrzoline **16d** was obtained after column chromatography (hexane: EtOAc, 3:1) as a colourless oil (25.9 mg, 0.076 mmol, 38%).

**<sup>1</sup>H NMR (500 MHz, CD<sub>3</sub>OD)**  $\delta$  7.32 (d,  $J$  = 1.8 Hz, 1H), 7.22 (d,  $J$  = 1.8 Hz, 1H), 4.22 (t,  $J$  = 6.7 Hz, 2H), 3.20 (d,  $J$  = 17.5 Hz, 1H), 3.03 (d,  $J$  = 17.4 Hz, 1H), 2.97 (dd,  $J$  = 8.6, 4.2 Hz, 1H), 2.93–2.83 (m, 1H), 2.39 (ddd,  $J$  = 12.2, 7.9, 4.2 Hz, 1H), 2.33–2.19 (m, 1H), 1.68 (dt,  $J$  = 14.5, 6.7 Hz, 2H), 1.43 (dq,  $J$  = 14.8, 7.4 Hz, 2H), 0.96 (t,  $J$  = 7.4 Hz, 3H).

**<sup>13</sup>C NMR (126 MHz, CD<sub>3</sub>OD)**  $\delta$  164.3, 151.0, 141.0, 140.0, 134.7, 132.5, 129.1, 122.9, 78.9, 65.8, 44.6, 40.6, 31.9, 29.1, 20.2, 14.1.

**HRMS (ESI<sup>+</sup>),  $m/z$ :** calculated for C<sub>16</sub>H<sub>18</sub>Cl<sub>2</sub>N<sub>2</sub>O<sub>2</sub> [M + H]<sup>+</sup>: 341.0818, found: 341.0832.

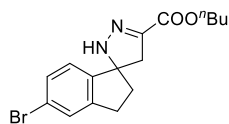

**Butyl 5-bromo-2,2',3,4'-tetrahydrospiro[indene-1,3'-pyrazole]-5'-carboxylate (17d):** Prepared according to the general procedure A, the title compound was prepared from *N*-tosylhydrazone (**17b**) (76.0 mg, 0.2 mmol, 1.0 equiv) and butyl acrylate (**1c**) (44.0  $\mu$ l, 0.3 mmol, 1.5 equiv). Spiropyrazoline **17d** was obtained after column chromatography (hexane: EtOAc, 3:1) as a colourless oil (33.7 mg, 0.096 mmol, 48%).

**<sup>1</sup>H NMR (500 MHz, CD<sub>3</sub>OD)**  $\delta$  7.45–7.28 (m, 2H), 7.19 (d,  $J$  = 8.1 Hz, 1H), 4.21 (t,  $J$  = 6.6 Hz, 2H), 3.16 (d,  $J$  = 17.3 Hz, 1H), 3.02 (d,  $J$  = 17.4 Hz, 1H), 2.98–2.84 (m, 2H), 2.31 (dd,  $J$  = 7.8, 4.7 Hz, 1H), 2.27–2.17 (m, 1H), 1.74–1.63 (m, 2H), 1.46–1.38 (m, 2H), 0.96 (t,  $J$  = 7.4 Hz, 3H).

**<sup>13</sup>C NMR (126 MHz, CD<sub>3</sub>OD)**  $\delta$  164.5, 146.6, 146.4, 139.7, 131.3, 129.0, 125.6, 123.1, 78.0, 65.7, 44.3, 41.3, 31.9, 30.0, 20.2, 14.1.

**HRMS (ESI<sup>+</sup>),  $m/z$ :** calculated for C<sub>16</sub>H<sub>19</sub>BrN<sub>2</sub>O<sub>2</sub> [M + H]<sup>+</sup>: 351.0703, found: 351.0735.

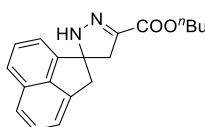

**Butyl 2',4'-dihydro-2H-spiro[acenaphthylene-1,3'-pyrazole]-5'-carboxylate (18d):** Prepared according to the general procedure A, the title compound was prepared from *N*-tosylhydrazone (**18b**) (67.2 mg, 0.2 mmol, 1.0 equiv) and butyl acrylate (**1c**) (44.0  $\mu$ l, 0.3 mmol, 1.5 equiv). Spiropyrazoline **18d** was obtained after column chromatography (hexane: EtOAc, 3:1) as a colourless oil (45.0 mg, 0.146 mmol, 73%).

**<sup>1</sup>H NMR (500 MHz, CD<sub>3</sub>OD)**  $\delta$  7.70 (d,  $J$  = 8.2 Hz, 1H), 7.63 (d,  $J$  = 8.3 Hz, 1H), 7.49 (dt,  $J$  = 14.7, 7.6 Hz, 2H), 7.39 (d,  $J$  = 7.0 Hz, 1H), 7.27 (d,  $J$  = 6.8 Hz, 1H), 4.21 (t,  $J$  = 6.7 Hz, 2H), 3.67–3.50 (m, 2H), 3.25 (s, 2H), 1.67 (p,  $J$  = 6.9 Hz, 2H), 1.42 (h,  $J$  = 7.5 Hz, 2H), 0.95 (t,  $J$  = 7.4 Hz, 3H).

**<sup>13</sup>C NMR (126 MHz, CD<sub>3</sub>OD)**  $\delta$  164.5, 148.3, 141.7, 139.9, 138.0, 132.5, 129.5, 129.5, 125.9, 123.9, 120.9, 119.8, 77.1, 65.8, 48.6, 47.0, 31.9, 20.2, 14.1.

**HRMS (ESI<sup>+</sup>),  $m/z$ :** calculated for C<sub>19</sub>H<sub>20</sub>N<sub>2</sub>O<sub>2</sub> [M + H]<sup>+</sup>: 309.1598, found: 309.1604.



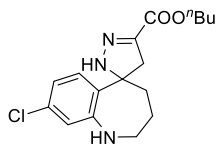

**Butyl 8-chloro-1,2,2',3,4,4'-hexahydrospiro[benzo[b]azepine-5,3'-pyrazole]-5'-carboxylate (19d):**

Prepared according to the general procedure A, the title compound was prepared from *N*-tosylhydrazone (**19b**) (72.6 mg, 0.2 mmol, 1.0 equiv) and butyl acrylate (**1c**) (44.0  $\mu$ l, 0.3 mmol, 1.5 equiv). Spiropyrazoline **19d** was obtained after column chromatography (hexane: EtOAc, 3:1) as a colourless oil (38.9 mg, 0.116 mmol, 58%).

**<sup>1</sup>H NMR (500 MHz, CD<sub>3</sub>OD)**  $\delta$  7.29 (d,  $J$  = 2.5 Hz, 1H), 7.00 (dd,  $J$  = 8.3, 2.5 Hz, 1H), 6.79 (d,  $J$  = 8.3 Hz, 1H), 4.16 (t,  $J$  = 6.7 Hz, 2H), 3.29 (d,  $J$  = 17.4 Hz, 1H), 3.26–3.18 (m, 1H), 2.81 (d,  $J$  = 17.4 Hz, 1H), 2.74 (m, 1H), 2.03–1.75 (m, 4H), 1.72–1.60 (m, 2H), 1.47–1.34 (m, 2H), 0.94 (t,  $J$  = 7.4 Hz, 3H).

**<sup>13</sup>C NMR (126 MHz, CD<sub>3</sub>OD)**  $\delta$  164.7, 149.4, 139.9, 137.9, 128.6, 127.8, 126.8, 123.3, 74.8, 65.7, 48.8, 42.1, 37.2, 31.9, 27.0, 20.2, 14.1.

**HRMS (ESI<sup>+</sup>),  $m/z$ :** calculated for C<sub>17</sub>H<sub>22</sub>ClN<sub>3</sub>O<sub>2</sub> [M + H]<sup>+</sup>: 336.1473, found: 336.1498.

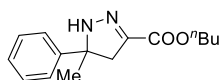

**Butyl 5-methyl-5-phenyl-4,5-dihydro-1H-pyrazole-3-carboxylate (20d):** Prepared according to the general procedure A, the title compound was prepared from *N*-tosylhydrazone (**20b**) (57.2mg, 0.2 mmol, 1.0 equiv) and butyl acrylate (**1c**) (44.0  $\mu$ l, 0.3 mmol, 1.5 equiv). Spiropyrazoline **20d** was obtained after column chromatography (hexane: EtOAc, 3:1) as a colourless oil (43.2 mg, 0.166 mmol, 83%).

**<sup>1</sup>H NMR (500 MHz, CDCl<sub>3</sub>)**  $\delta$  7.45–7.31 (m, 4H), 7.28 (d,  $J$  = 7.0 Hz, 1H), 6.32 (s, 1H), 4.24 (t,  $J$  = 6.8 Hz, 2H), 3.18–3.01 (m, 2H), 1.70 (dt,  $J$  = 14.7, 6.9 Hz, 2H), 1.62 (s, 3H), 1.42 (dq,  $J$  = 14.8, 7.4 Hz, 2H), 0.94 (t,  $J$  = 7.4 Hz, 3H).

**<sup>13</sup>C NMR (126 MHz, CDCl<sub>3</sub>)**  $\delta$  162.4, 144.9, 140.4, 128.2, 126.8, 124.7, 69.4, 64.5, 45.9, 30.2, 27.0, 18.7, 13.3.

**HRMS (ESI<sup>+</sup>),  $m/z$ :** calculated for C<sub>15</sub>H<sub>20</sub>N<sub>2</sub>O<sub>2</sub> [M + H]<sup>+</sup>: 261.1598, found: 261.1559.

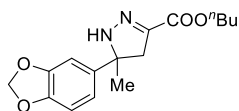

**Butyl 5-(benzo[d][1,3]dioxol-5-yl)-5-methyl-4,5-dihydro-1H-pyrazole-3-carboxylate (21d):**

Prepared according to the general procedure A, the title compound was prepared from *N*-tosylhydrazone (**21b**) (66.4 mg, 0.2 mmol, 1.0 equiv) and butyl acrylate (**1c**) (44.0  $\mu$ l, 0.3 mmol, 1.5 equiv). Spiropyrazoline **21d** was obtained after column chromatography (hexane: EtOAc, 3:1) as a colourless oil (35.2 mg, 0.116 mmol, 58%).

**<sup>1</sup>H NMR (500 MHz, CD<sub>3</sub>OD)**  $\delta$  6.91–6.82 (m, 2H), 6.76 (d,  $J$  = 8.1 Hz, 1H), 5.91 (s, 2H), 4.19 (t,  $J$  = 6.6 Hz, 2H), 3.04 (d,  $J$  = 16.9 Hz, 1H), 2.93 (d,  $J$  = 17.0 Hz, 1H), 1.66 (dt,  $J$  = 14.5, 6.6 Hz, 2H), 1.50 (s, 3H), 1.45–1.36 (m, 2H), 0.95 (t,  $J$  = 7.4 Hz, 3H).

**<sup>13</sup>C NMR (126 MHz, CD<sub>3</sub>OD)**  $\delta$  164.7, 149.3, 147.9, 141.5, 139.8, 119.4, 109.0, 107.2, 102.4, 71.2, 65.7, 46.8, 31.9, 28.0, 20.2, 14.1.

**HRMS (ESI<sup>+</sup>),  $m/z$ :** calculated for C<sub>16</sub>H<sub>20</sub>N<sub>2</sub>O<sub>4</sub> [M + H]<sup>+</sup>: 305.1496, found: 305.1515.

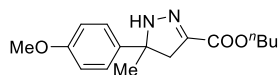

**Butyl 5-(4-methoxyphenyl)-5-methyl-4,5-dihydro-1H-pyrazole-3-carboxylate (22d):** Prepared according to the general procedure A, the title compound was prepared from *N*-tosylhydrazone (**22b**) (63.6 mg, 0.2 mmol, 1.0 equiv) and butyl acrylate (**1c**) (44.0  $\mu$ l, 0.3 mmol, 1.5 equiv). Spiropyrazoline **22d** was obtained after column chromatography (hexane: EtOAc, 3:1) as a colourless oil (38.9 mg, 0.134 mmol, 67%).

**<sup>1</sup>H NMR (500 MHz, CD<sub>3</sub>OD)**  $\delta$  7.30 (d,  $J$  = 8.8 Hz, 2H), 6.88 (d,  $J$  = 8.9 Hz, 2H), 4.19 (t,  $J$  = 6.6 Hz, 2H), 3.76 (s, 3H), 3.05 (d,  $J$  = 16.9 Hz, 1H), 2.94 (d,  $J$  = 16.9 Hz, 1H), 1.66 (dt,  $J$  = 14.5, 6.7 Hz, 2H), 1.52 (s, 3H), 1.46–1.37 (m, 2H), 0.95 (t,  $J$  = 7.4 Hz, 3H).

**<sup>13</sup>C NMR (126 MHz, CD<sub>3</sub>OD)**  $\delta$  164.7, 160.1, 139.7, 139.4, 127.5, 114.9, 70.8, 65.7, 55.7, 46.7, 31.9, 27.9, 20.2, 14.1.

**HRMS (ESI<sup>+</sup>),  $m/z$ :** calculated for C<sub>16</sub>H<sub>22</sub>N<sub>2</sub>O<sub>3</sub> [M + H]<sup>+</sup>: 291.1703, found: 291.1716

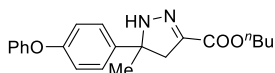

**Butyl 5-methyl-5-(4-phenoxyphenyl)-4,5-dihydro-1H-pyrazole-3-carboxylate (23d):** Prepared according to the general procedure A, the title compound was prepared from *N*-tosylhydrazone (**23b**) (76.0 mg, 0.2 mmol, 1.0 equiv) and butyl acrylate (**1c**) (44.0  $\mu$ l, 0.3 mmol, 1.5 equiv). Pyrazoline **23d** was obtained after column chromatography (hexane: EtOAc, 3:1) as a colourless oil (54.3 mg, 0.154 mmol, 77%).

**<sup>1</sup>H NMR (500 MHz, CD<sub>3</sub>OD)**  $\delta$  7.40–7.31 (m, 4H), 7.10 (tt,  $J$  = 7.4, 1.1 Hz, 1H), 6.99–6.93 (m, 4H), 4.20 (t,  $J$  = 6.6 Hz, 2H), 3.10 (d,  $J$  = 16.9 Hz, 1H), 2.98 (d,  $J$  = 17.0 Hz, 1H), 1.67 (dt,  $J$  = 14.5, 6.7 Hz, 2H), 1.55 (s, 3H), 1.42 (h,  $J$  = 7.4 Hz, 2H), 0.96 (t,  $J$  = 7.4 Hz, 3H).

**<sup>13</sup>C NMR (126 MHz, CD<sub>3</sub>OD)**  $\delta$  164.7, 158.6, 157.7, 142.4, 139.8, 130.9, 127.9, 124.5, 119.9, 119.7, 70.9, 65.7, 46.7, 31.9, 27.9, 20.2, 14.1.

**HRMS (ESI<sup>+</sup>),  $m/z$ :** calculated for C<sub>21</sub>H<sub>25</sub>N<sub>2</sub>O<sub>3</sub> [M + H]<sup>+</sup>: 353.1860, found: 353.1875.

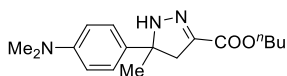

**Butyl 5-(4-(dimethylamino)phenyl)-5-methyl-4,5-dihydro-1H-pyrazole-3-carboxylate butyl 5-(4-methoxyphenyl)-5-methyl-4,5-dihydro-1H-pyrazole-3-carboxylate (24d):** Prepared according to the general procedure A, the title compound was prepared from *N*-tosylhydrazone (**24b**) (66.2 mg, 0.2 mmol, 1.0 equiv) and butyl acrylate (**1c**) (44.0  $\mu$ l, 0.3 mmol, 1.5 equiv). Pyrazoline **24d** was obtained after column chromatography (hexane: EtOAc, 3:1) as a colourless oil (46.7 mg, 0.154 mmol, 77%).

**<sup>1</sup>H NMR (500 MHz, CD<sub>3</sub>OD)**  $\delta$  7.22 (d,  $J$  = 8.9 Hz, 2H), 6.75 (d,  $J$  = 8.8 Hz, 2H), 4.19 (t,  $J$  = 6.6 Hz, 2H), 3.02 (d,  $J$  = 16.8 Hz, 1H), 2.95 (d,  $J$  = 16.9 Hz, 1H), 2.90 (s, 6H), 1.67 (dt,  $J$  = 14.6, 6.7 Hz, 2H), 1.52 (s, 3H), 1.48–1.37 (m, 2H), 0.96 (t,  $J$  = 7.4 Hz, 3H).

**<sup>13</sup>C NMR (126 MHz, CD<sub>3</sub>OD)**  $\delta$  164.8, 151.3, 139.5, 135.5, 126.9, 114.1, 70.8, 65.6, 46.7, 41.1, 31.9, 27.7, 20.2, 14.1.

**HRMS (ESI<sup>+</sup>),  $m/z$ :** calculated for C<sub>17</sub>H<sub>26</sub>N<sub>3</sub>O<sub>2</sub> [M + H]<sup>+</sup>: 304.2020, found: 304.2036.

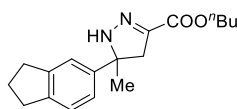

**Butyl 5-(2,3-dihydro-1H-inden-5-yl)-5-methyl-4,5-dihydro-1H-pyrazole-3-carboxylate (25d):**

Prepared according to the general procedure A, the title compound was prepared from *N*-tosylhydrazone (**25b**) (65.6 mg, 0.2 mmol, 1.0 equiv) and butyl acrylate (**1c**) (44.0  $\mu$ l, 0.3 mmol, 1.5 equiv). Pyrazoline **25d** was obtained after column chromatography (hexane: EtOAc, 3:1) as a colourless oil (49.8 mg, 0.166 mmol, 83%).

**<sup>1</sup>H NMR (500 MHz, CD<sub>3</sub>OD)**  $\delta$  7.23 (d,  $J$  = 1.7 Hz, 1H), 7.19 – 7.10 (m, 2H), 4.19 (t,  $J$  = 6.7 Hz, 2H), 3.07 (d,  $J$  = 16.8 Hz, 1H), 2.95 (d,  $J$  = 16.9 Hz, 1H), 2.87 (dt,  $J$  = 12.0, 7.4 Hz, 4H), 2.06 (p,  $J$  = 7.4 Hz, 2H), 1.74–1.61 (m, 2H), 1.53 (s, 3H), 1.49–1.35 (m, 2H), 0.96 (t,  $J$  = 7.4 Hz, 3H).

**<sup>13</sup>C NMR (126 MHz, CD<sub>3</sub>OD)**  $\delta$  162.9, 143.8, 143.5, 142.0, 137.8, 123.3, 122.3, 120.2, 69.5, 63.8, 44.8, 31.9, 31.5, 30.0, 26.3, 24.8, 18.3, 12.2.

**HRMS (ESI<sup>+</sup>),  $m/z$ :** calculated for C<sub>18</sub>H<sub>24</sub>N<sub>2</sub>O<sub>2</sub> [M + H]<sup>+</sup>: 301.1911, found: 301.1889.

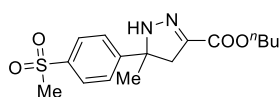

**Butyl 5-methyl-5-(4-(methylsulfonyl)phenyl)-4,5-dihydro-1H-pyrazole-3-carboxylate (26d):**

Prepared according to the general procedure A, the title compound was prepared from *N*-tosylhydrazone (**26b**) (73.0 mg, 0.2 mmol, 1.0 equiv) and butyl acrylate (**1c**) (44.0  $\mu$ l, 0.3 mmol, 1.5 equiv). Pyrazoline **26d** was obtained after column chromatography (hexane: EtOAc, 3:1) as a colourless oil (61.5 mg, 0.182 mmol, 91%).

**<sup>1</sup>H NMR (500 MHz, CD<sub>3</sub>OD)**  $\delta$  7.94 (d,  $J$  = 8.5 Hz, 2H), 7.69 (d,  $J$  = 8.6 Hz, 2H), 4.21 (t,  $J$  = 6.6 Hz, 2H), 3.20 (d,  $J$  = 17.0 Hz, 1H), 3.11 (s, 3H), 2.99 (d,  $J$  = 17.0 Hz, 1H), 1.68 (dt,  $J$  = 14.5, 6.6 Hz, 2H), 1.59 (s, 3H), 1.43 (dq,  $J$  = 14.8, 7.4 Hz, 2H), 0.96 (t,  $J$  = 7.4 Hz, 3H).

**<sup>13</sup>C NMR (126 MHz, CD<sub>3</sub>OD)**  $\delta$  164.4, 153.8, 140.7, 140.3, 128.8, 127.7, 71.2, 65.8, 46.5, 44.4, 31.9, 27.8, 20.2, 14.1.

**HRMS (ESI<sup>+</sup>),  $m/z$ :** calculated for C<sub>16</sub>H<sub>22</sub>N<sub>2</sub>O<sub>4</sub>S [M + H]<sup>+</sup>: 339.1371, found: 339.1350.

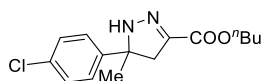

**Butyl 5-(4-chlorophenyl)-5-methyl-4,5-dihydro-1H-pyrazole-3-carboxylate (27d):** Prepared according to the general procedure A, the title compound was prepared from *N*-tosylhydrazone (**27b**) (65.7 mg, 0.2 mmol, 1.0 equiv) and butyl acrylate (**1c**) (44.0  $\mu$ l, 0.3 mmol, 1.5 equiv). Pyrazoline **27d** was obtained after column chromatography (hexane: EtOAc, 3:1) as a colourless oil (57.7 mg, 0.196 mmol, 98%).

**<sup>1</sup>H NMR (500 MHz, CD<sub>3</sub>OD)**  $\delta$  7.39 (d,  $J$  = 8.7 Hz, 2H), 7.34 (d,  $J$  = 8.7 Hz, 2H), 4.20 (t,  $J$  = 6.6 Hz, 2H), 3.11 (d,  $J$  = 16.9 Hz, 1H), 2.95 (d,  $J$  = 17.0 Hz, 1H), 1.76–1.62 (m, 2H), 1.54 (s, 3H), 1.49–1.35 (m, 2H), 0.96 (t,  $J$  = 7.4 Hz, 3H).

**<sup>13</sup>C NMR (126 MHz, CD<sub>3</sub>OD)**  $\delta$  162.7, 144.4, 138.1, 132.0, 127.7, 126.3, 69.0, 63.9, 44.7, 30.0, 25.8, 18.3, 12.2.

**HRMS (ESI<sup>+</sup>),  $m/z$ :** calculated for C<sub>15</sub>H<sub>19</sub>ClN<sub>2</sub>O<sub>2</sub> [M + H]<sup>+</sup>: 295.1208, found: 295.1220.

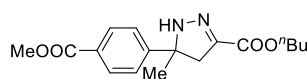

**Butyl 5-(4-(methoxycarbonyl)phenyl)-5-methyl-4,5-dihydro-1H-pyrazole-3-carboxylate (28d):** Prepared according to the general procedure A, the title compound was prepared from *N*-tosylhydrazone (**28b**) (69.2 mg, 0.2 mmol, 1.0 equiv) and butyl acrylate (**1c**) (44.0  $\mu$ l, 0.3 mmol, 1.5 equiv). Pyrazoline **28d** was obtained after column chromatography (hexane: EtOAc, 3:1) as a colourless oil (47.7 mg, 0.15 mmol, 75%).

**<sup>1</sup>H NMR (500 MHz, CDCl<sub>3</sub>)**  $\delta$  8.02 (d,  $J$  = 8.5 Hz, 2H), 7.46 (d,  $J$  = 8.5 Hz, 2H), 6.32 (s, 1H), 4.24 (t,  $J$  = 6.8 Hz, 2H), 3.92 (s, 3H), 3.15 (d,  $J$  = 17.1 Hz, 1H), 3.05 (d,  $J$  = 17.1 Hz, 1H), 1.77–1.66 (m, 2H), 1.63 (s, 3H), 1.54–1.36 (m, 2H), 0.94 (t,  $J$  = 7.4 Hz, 3H).

**<sup>13</sup>C NMR (126 MHz, CDCl<sub>3</sub>)**  $\delta$  166.2, 162.2, 149.9, 140.6, 129.6, 128.7, 124.8, 69.4, 64.7, 51.7, 45.9, 30.2, 27.0, 18.7, 13.3.

**HRMS (ESI<sup>+</sup>),  $m/z$ :** calculated for C<sub>17</sub>H<sub>22</sub>N<sub>2</sub>O<sub>4</sub> [M + H]<sup>+</sup>: 319.1652, found: 319.1665.

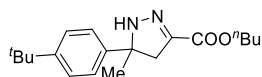

**Butyl 5-(4-(tert-butyl)phenyl)-5-methyl-4,5-dihydro-1H-pyrazole-3-carboxylate (29d):** Prepared according to the general procedure A, the title compound was prepared from *N*-tosylhydrazone (**29b**) (68.8 mg, 0.2 mmol, 1.0 equiv) and butyl acrylate (**1c**) (44.0  $\mu$ l, 0.3 mmol, 1.5 equiv). Pyrazoline **29d** was obtained after column chromatography (hexane: EtOAc, 3:1) as a colourless oil (60.7 mg, 0.192 mmol, 96%).

**<sup>1</sup>H NMR (500 MHz, CD<sub>3</sub>OD)**  $\delta$  7.37 (d,  $J$  = 8.5 Hz, 2H), 7.30 (d,  $J$  = 8.5 Hz, 2H), 4.19 (s, 2H), 3.05 (s, 1H), 2.98 (s, 1H), 1.67 (dq,  $J$  = 8.7, 6.7 Hz, 2H), 1.53 (s, 3H), 1.47–1.38 (m, 2H), 1.30 (s, 9H), 0.95 (t,  $J$  = 7.4 Hz, 3H).

**<sup>13</sup>C NMR (126 MHz, CD<sub>3</sub>OD)**  $\delta$  164.7, 151.0, 144.4, 139.7, 126.5, 126.0, 71.1, 65.7, 46.6, 35.3, 31.9, 31.8, 27.9, 20.2, 14.1.

**HRMS (ESI<sup>+</sup>),  $m/z$ :** calculated for C<sub>19</sub>H<sub>28</sub>N<sub>2</sub>O<sub>2</sub> [M + H]<sup>+</sup>: 317.2224, found: 317.2230.

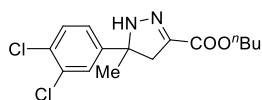

**Butyl 5-(3,4-dichlorophenyl)-5-methyl-4,5-dihydro-1H-pyrazole-3-carboxylate (30d):** Prepared according to the general procedure A, the title compound was prepared from *N*-tosylhydrazone (**30b**) (71.3 mg, 0.2 mmol, 1.0 equiv) and butyl acrylate (**1c**) (44.0  $\mu$ l, 0.3 mmol, 1.5 equiv). Pyrazoline **30d** was obtained after column chromatography (hexane: EtOAc, 3:1) as a colourless oil (38.8 mg, 0.118 mmol, 59%).

**<sup>1</sup>H NMR (500 MHz, CD<sub>3</sub>OD)**  $\delta$  7.58 (d,  $J$  = 2.2 Hz, 1H), 7.49 (d,  $J$  = 8.4 Hz, 1H), 7.34 (dd,  $J$  = 8.4, 2.2 Hz, 1H), 4.20 (t,  $J$  = 6.6 Hz, 2H), 3.13 (d,  $J$  = 17.0 Hz, 1H), 2.95 (d,  $J$  = 17.0 Hz, 1H), 1.74–1.62 (m, 2H), 1.54 (s, 3H), 1.47–1.37 (m, 2H), 0.95 (t,  $J$  = 7.4 Hz, 3H).

**<sup>13</sup>C NMR (126 MHz, CD<sub>3</sub>OD)**  $\delta$  162.5, 146.5, 138.4, 131.5, 130.0, 129.8, 126.9, 124.7, 68.7, 63.9, 44.7, 30.0, 25.7, 18.3, 12.2.

**HRMS (ESI<sup>+</sup>),  $m/z$ :** calculated for C<sub>15</sub>H<sub>18</sub>Cl<sub>2</sub>N<sub>2</sub>O<sub>2</sub> [M + Na]<sup>+</sup>: 351.0638, found: 351.0654.

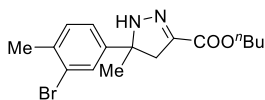

**Butyl 5-(3-bromo-4-methylphenyl)-5-methyl-4,5-dihydro-1H-pyrazole-3-carboxylate (31d):**

Prepared according to the general procedure A, the title compound was prepared from *N*-tosylhydrazone (31b) (76.3 mg, 0.2 mmol, 1.0 equiv) and butyl acrylate (1c) (44.0  $\mu$ l, 0.3 mmol, 1.5 equiv). Pyrazoline 31d was obtained after column chromatography (hexane: EtOAc, 3:1) as a colourless oil (40.2 mg, 0.114 mmol, 57%).

**<sup>1</sup>H NMR (500 MHz, CD<sub>3</sub>OD)**  $\delta$  7.57 (d,  $J$  = 1.3 Hz, 1H), 7.25 (d,  $J$  = 1.6 Hz, 2H), 4.19 (t,  $J$  = 6.6 Hz, 2H), 3.08 (d,  $J$  = 17.0 Hz, 1H), 2.93 (d,  $J$  = 16.9 Hz, 1H), 2.34 (s, 3H), 1.74–1.61 (m, 2H), 1.52 (s, 3H), 1.49–1.38 (m, 2H), 0.94 (t,  $J$  = 7.4 Hz, 3H).

**<sup>13</sup>C NMR (126 MHz, CD<sub>3</sub>OD)**  $\delta$  162.6, 145.4, 138.1, 135.7, 130.2, 128.4, 123.9, 123.8, 68.7, 63.9, 44.7, 30.0, 25.9, 20.7, 18.3, 12.2.

**HRMS (ESI<sup>+</sup>),  $m/z$ :** calculated for C<sub>16</sub>H<sub>21</sub>BrN<sub>2</sub>O<sub>2</sub> [M + Na]<sup>+</sup>: 375.0679, found: 375.0680.

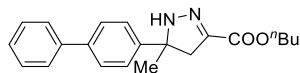

**Butyl 5-([1,1'-biphenyl]-4-yl)-5-methyl-4,5-dihydro-1H-pyrazole-3-carboxylate (32d):** Prepared according to the general procedure A, the title compound was prepared from *N*-tosylhydrazone (32b) (72.9 mg, 0.2 mmol, 1.0 equiv) and butyl acrylate (1c) (44.0  $\mu$ l, 0.3 mmol, 1.5 equiv). Pyrazoline 32d was obtained after column chromatography (hexane: EtOAc, 3:1) as a colourless oil (58.5 mg, 0.174 mmol, 87%).

**<sup>1</sup>H NMR (500 MHz, CD<sub>3</sub>OD)**  $\delta$  7.59 (dd,  $J$  = 8.3, 2.4 Hz, 5H), 7.46 (dd,  $J$  = 8.3, 2.3 Hz, 2H), 7.41 (td,  $J$  = 6.8, 3.6 Hz, 2H), 7.31 (d,  $J$  = 2.4 Hz, 1H), 4.20 (td,  $J$  = 6.7, 2.3 Hz, 2H), 3.12 (dd,  $J$  = 17.0, 2.3 Hz, 1H), 3.00 (dd,  $J$  = 17.0, 2.3 Hz, 1H), 1.72–1.64 (m, 2H), 1.58 (d,  $J$  = 2.3 Hz, 3H), 1.46–1.37 (m, 2H), 0.95 (td,  $J$  = 7.5, 2.5 Hz, 3H).

**<sup>13</sup>C NMR (126 MHz, CD<sub>3</sub>OD)**  $\delta$  162.8, 144.6, 140.0, 139.3, 137.9, 128.0, 126.5, 126.3, 126.0, 125.0, 69.2, 63.8, 44.7, 30.0, 26.0, 18.3, 12.2.

**HRMS (ESI<sup>+</sup>),  $m/z$ :** calculated for C<sub>21</sub>H<sub>24</sub>N<sub>2</sub>O<sub>2</sub> [M + H]<sup>+</sup>: 337.1911, found: 337.1917.

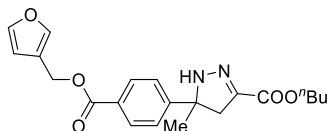

**Butyl 5-(4-((furan-3-ylmethoxy)carbonyl)phenyl)-5-methyl-4,5-dihydro-1H-pyrazole-3-carboxylate (33d):** Prepared according to the general procedure A, the title compound was prepared from *N*-tosylhydrazone (**33b**) (82.4 mg, 0.2 mmol, 1.0 equiv) and butyl acrylate (**1c**) (44.0  $\mu$ l, 0.3 mmol, 1.5 equiv). Pyrazoline **33d** was obtained after column chromatography (hexane: EtOAc, 3:1) as a colourless oil (48.4 mg, 0.126 mmol, 63%).

**<sup>1</sup>H NMR (500 MHz, CD<sub>3</sub>OD)**  $\delta$  8.06–7.92 (m, 2H), 7.52 (dd,  $J$  = 8.4, 1.8 Hz, 3H), 6.53 (dd,  $J$  = 3.3, 0.7 Hz, 1H), 6.42 (dd,  $J$  = 3.3, 1.9 Hz, 1H), 5.30 (s, 2H), 4.20 (t,  $J$  = 6.6 Hz, 2H), 3.15 (d,  $J$  = 16.9 Hz, 1H), 2.97 (d,  $J$  = 17.0 Hz, 1H), 1.77–1.61 (m, 2H), 1.56 (s, 3H), 1.50–1.35 (m, 2H), 0.95 (t,  $J$  = 7.4 Hz, 3H).

**<sup>13</sup>C NMR (126 MHz, CD<sub>3</sub>OD)**  $\delta$  167.3, 164.5, 153.0, 151.1, 144.7, 140.0, 130.9, 129.9, 126.7, 111.8, 111.7, 71.3, 65.8, 59.5, 46.4, 31.9, 27.8, 20.2, 14.1.

**HRMS (ESI<sup>+</sup>),  $m/z$ :** calculated for C<sub>21</sub>H<sub>24</sub>N<sub>2</sub>O<sub>5</sub> [M + H]<sup>+</sup>: 385.1758, found: 385.1765.

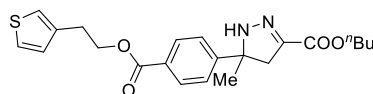

**Butyl 5-methyl-5-(4-((2-(thiophen-3-yl)ethoxy)carbonyl)phenyl)-4,5-dihydro-1H-pyrazole-3-carboxylate (34d):** Prepared according to the general procedure A, the title compound was prepared from *N*-tosylhydrazone (**34b**) (88.4 mg, 0.2 mmol, 1.0 equiv) and butyl acrylate (**1c**) (44.0  $\mu$ l, 0.3 mmol, 1.5 equiv). Pyrazoline **34d** was obtained after column chromatography (hexane: EtOAc, 3:1) as a colourless oil (54.7 mg, 0.132 mmol, 66%).

**<sup>1</sup>H NMR (500 MHz, CD<sub>3</sub>OD)**  $\delta$  8.00 (d,  $J$  = 8.5 Hz, 2H), 7.51 (d,  $J$  = 8.5 Hz, 2H), 7.28–7.13 (m, 1H), 6.92 (d,  $J$  = 3.6 Hz, 2H), 4.48 (t,  $J$  = 6.5 Hz, 2H), 4.19 (t,  $J$  = 6.6 Hz, 2H), 3.28 (t,  $J$  = 6.4 Hz, 2H), 3.15 (d,  $J$  = 17.0 Hz, 1H), 2.97 (d,  $J$  = 17.0 Hz, 1H), 1.66 (dt,  $J$  = 14.5, 6.7 Hz, 2H), 1.56 (s, 3H), 1.41 (h,  $J$  = 7.4 Hz, 2H), 0.95 (t,  $J$  = 7.4 Hz, 3H).

**<sup>13</sup>C NMR (126 MHz, CD<sub>3</sub>OD)**  $\delta$  167.5, 164.5, 152.9, 141.4, 140.1, 131.0, 130.1, 127.9, 126.8, 126.7, 125.1, 71.3, 66.6, 65.8, 46.5, 31.9, 30.3, 27.8, 20.2, 14.1.

**HRMS (ESI<sup>+</sup>),  $m/z$ :** calculated for C<sub>22</sub>H<sub>24</sub>N<sub>2</sub>O<sub>6</sub>S [M + H]<sup>+</sup>: 415.1573, found: 415.1537.



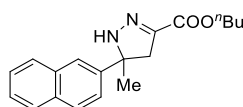

**Butyl 5-methyl-5-(naphthalen-2-yl)-4,5-dihydro-1H-pyrazole-3-carboxylate (35d):** Prepared according to the general procedure A, the title compound was prepared from *N*-tosylhydrazone (**35b**) (67.7 mg, 0.2 mmol, 1.0 equiv) and butyl acrylate (**1c**) (44.0  $\mu$ l, 0.3 mmol, 1.5 equiv). Pyrazoline **35d** was obtained after column chromatography (hexane: EtOAc, 3:1) as a colourless oil (50.3 mg, 0.162 mmol, 81%).

**<sup>1</sup>H NMR (500 MHz, CD<sub>3</sub>OD)**  $\delta$  8.06–7.92 (m, 1H), 7.87 (dd,  $J$  = 8.0, 1.6 Hz, 1H), 7.77 (d,  $J$  = 8.2 Hz, 1H), 7.68 (dd,  $J$  = 7.4, 1.2 Hz, 1H), 7.54–7.37 (m, 3H), 4.20 (t,  $J$  = 6.8 Hz, 2H), 3.48 (d,  $J$  = 17.1 Hz, 1H), 3.18 (d,  $J$  = 17.1 Hz, 1H), 1.72 (s, 3H), 1.71–1.61 (m, 2H), 1.49–1.35 (m, 2H), 0.94 (t,  $J$  = 7.4 Hz, 3H).

**<sup>13</sup>C NMR (126 MHz, CD<sub>3</sub>OD)**  $\delta$  161.4, 139.3, 136.2, 133.0, 127.8, 127.1, 126.2, 123.4, 123.0, 122.9, 122.7, 121.3, 68.0, 62.3, 42.6, 28.5, 25.3, 16.8, 10.7.

**HRMS (ESI+),  $m/z$ :** calculated for C<sub>19</sub>H<sub>22</sub>N<sub>2</sub>O<sub>2</sub> [M + H]<sup>+</sup>: 311.1754, found: 311.1753.

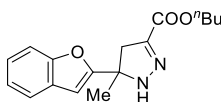

**Butyl 5-(benzofuran-2-yl)-5-methyl-4,5-dihydro-1H-pyrazole-3-carboxylate (36d):** Prepared according to the general procedure A, the title compound was prepared from *N*-tosylhydrazone (**36b**) (65.7 mg, 0.2 mmol, 1.0 equiv) and butyl acrylate (**1c**) (44.0  $\mu$ l, 0.3 mmol, 1.5 equiv). Pyrazoline **36d** was obtained after column chromatography (hexane: EtOAc, 3:1) as a colourless oil (21.0 mg, 0.07 mmol, 35%).

**<sup>1</sup>H NMR (500 MHz, CD<sub>3</sub>OD)**  $\delta$  7.60–7.49 (m, 1H), 7.43 (dd,  $J$  = 8.1, 1.0 Hz, 1H), 7.21 (ddd,  $J$  = 21.9, 7.9, 1.2 Hz, 2H), 6.70 (d,  $J$  = 0.9 Hz, 1H), 4.21 (t,  $J$  = 6.6 Hz, 2H), 3.34 (d,  $J$  = 17.2 Hz, 1H), 3.01 (d,  $J$  = 17.1 Hz, 1H), 1.73–1.63 (m, 5H), 1.49–1.36 (m, 2H), 0.95 (t,  $J$  = 7.4 Hz, 3H).

**<sup>13</sup>C NMR (126 MHz, CD<sub>3</sub>OD)**  $\delta$  162.5, 159.0, 154.6, 138.5, 127.6, 123.5, 122.1, 120.3, 110.1, 101.2, 65.0, 63.9, 42.1, 30.0, 23.1, 18.3, 12.2.

**HRMS (ESI+),  $m/z$ :** calculated for C<sub>17</sub>H<sub>20</sub>N<sub>2</sub>O<sub>3</sub> [M + H]<sup>+</sup>: 301.1547, found: 301.1565.

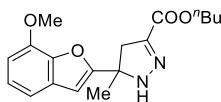

**Butyl 5-(7-methoxybenzofuran-2-yl)-5-methyl-4,5-dihydro-1H-pyrazole-3-carboxylate (37d):**

Prepared according to the general procedure A, the title compound was prepared from *N*-tosylhydrazone (**37b**) (71.6 mg, 0.2 mmol, 1.0 equiv) and butyl acrylate (**1c**) (44.0  $\mu$ l, 0.3 mmol, 1.5 equiv). Pyrazoline **37d** was obtained after column chromatography (hexane: EtOAc, 3:1) as a colourless oil (48.2 mg, 0.146 mmol, 73%).

**<sup>1</sup>H NMR (500 MHz, CD<sub>3</sub>OD)**  $\delta$  7.23–7.06 (m, 2H), 6.94–6.79 (m, 1H), 6.71 (d,  $J$  = 2.7 Hz, 1H), 4.27–4.20 (m, 2H), 3.98 (s, 3H), 3.38 (d,  $J$  = 17.1 Hz, 1H), 3.04 (d,  $J$  = 17.1 Hz, 1H), 1.70 (s, 5H), 1.53–1.38 (m, 2H), 0.98 (t,  $J$  = 7.4 Hz, 3H).

**<sup>13</sup>C NMR (126 MHz, CD<sub>3</sub>OD)**  $\delta$  164.4, 160.8, 146.7, 145.7, 140.4, 131.2, 124.7, 114.4, 108.0, 103.4, 67.0, 65.8, 56.5, 44.0, 31.9, 25.0, 20.2, 14.1.

**HRMS (ESI<sup>+</sup>),  $m/z$ :** calculated for C<sub>18</sub>H<sub>23</sub>N<sub>2</sub>O<sub>4</sub> [M + H]<sup>+</sup>: 331.1652, found: 331.1689.

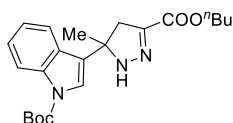

**Tert-butyl 3-(3-(butoxycarbonyl)-5-methyl-4,5-dihydro-1H-pyrazol-5-yl)-1H-indole-1-carboxylate (38d):**

Prepared according to the general procedure A, the title compound was prepared from *N*-tosylhydrazone (**38b**) (80.6 mg, 0.2 mmol, 1.0 equiv) and butyl acrylate (**1c**) (44.0  $\mu$ l, 0.3 mmol, 1.5 equiv). Pyrazoline **38d** was obtained after column chromatography (hexane: EtOAc, 3:1) as a colourless oil (62.3 mg, 0.156 mmol, 78%).

**<sup>1</sup>H NMR (500 MHz, CD<sub>3</sub>OD)**  $\delta$  8.16 (d,  $J$  = 8.3 Hz, 1H), 7.61–7.48 (m, 2H), 7.40–7.27 (m, 1H), 7.27–7.17 (m, 1H), 4.24 (t,  $J$  = 6.7 Hz, 2H), 3.15 (q,  $J$  = 17.1 Hz, 2H), 1.68 (d,  $J$  = 5.9 Hz, 14H), 1.45 (dq,  $J$  = 14.8, 7.4 Hz, 2H), 0.98 (t,  $J$  = 7.4 Hz, 3H).

**<sup>13</sup>C NMR (126 MHz, CD<sub>3</sub>OD)**  $\delta$  164.7, 151.0, 139.9, 137.7, 129.2, 126.4, 125.5, 123.7, 123.0, 121.4, 116.4, 85.1, 66.6, 65.8, 45.0, 31.9, 28.4, 26.6, 20.2, 14.1.

**HRMS (ESI<sup>+</sup>),  $m/z$ :** calculated for C<sub>22</sub>H<sub>29</sub>N<sub>3</sub>O<sub>4</sub> [M + K]<sup>+</sup>: 438.1790, found: 438.1836.

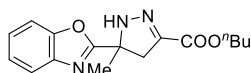

**Butyl 5-(benzo[d]oxazol-2-yl)-5-methyl-4,5-dihydro-1H-pyrazole-3-carboxylate (39d):** Prepared according to the general procedure A, the title compound was prepared from *N*-tosylhydrazone (**39b**) (66.0 mg, 0.2 mmol, 1.0 equiv) and butyl acrylate (**1c**) (44.0  $\mu$ l, 0.3 mmol, 1.5 equiv). Pyrazoline **39d** was obtained after column chromatography (hexane: EtOAc, 3:1) as a colourless oil (30.1 mg, 0.1 mmol, 50%).

**$^1\text{H}$  NMR (500 MHz,  $\text{CDCl}_3$ )**  $\delta$  7.78–7.65 (m, 1H), 7.58–7.46 (m, 1H), 7.43–7.31 (m, 2H), 6.72 (s, 1H), 4.25 (t,  $J$  = 6.8 Hz, 2H), 3.79 (d,  $J$  = 17.4 Hz, 1H), 3.12 (d,  $J$  = 17.4 Hz, 1H), 1.82 (s, 3H), 1.76–1.65 (m, 2H), 1.48–1.37 (m, 2H), 0.94 (t,  $J$  = 7.4 Hz, 3H).

**$^{13}\text{C}$  NMR (126 MHz,  $\text{CDCl}_3$ )**  $\delta$  168.3, 163.6, 152.5, 144.0, 142.0, 127.0, 126.1, 121.7, 112.2, 67.6, 66.7, 44.4, 32.1, 26.7, 20.6, 15.1.

**HRMS (ESI+),  $m/z$ :** calculated for  $\text{C}_{16}\text{H}_{19}\text{N}_3\text{O}_3$   $[\text{M} + \text{H}]^+$ : 302.1499, found: 302.1535.

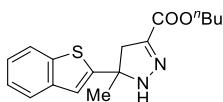

**Butyl 5-(benzo[b]thiophen-2-yl)-5-methyl-4,5-dihydro-1H-pyrazole-3-carboxylate (40d):** Prepared according to the general procedure A, the title compound was prepared from *N*-tosylhydrazone (**40b**) (68.8 mg, 0.2 mmol, 1.0 equiv) and butyl acrylate (**1c**) (44.0  $\mu$ l, 0.3 mmol, 1.5 equiv). Pyrazoline **40d** was obtained after column chromatography (hexane: EtOAc, 3:1) as a colourless oil (37.9 mg, 0.12 mmol, 60%).

**$^1\text{H}$  NMR (500 MHz,  $\text{CD}_3\text{OD}$ )**  $\delta$  7.78 (d,  $J$  = 8.0 Hz, 1H), 7.75–7.64 (m, 1H), 7.33–7.23 (m, 3H), 4.20 (t,  $J$  = 6.6 Hz, 2H), 3.21–3.08 (m, 2H), 1.77–1.63 (m, 5H), 1.47–1.36 (m, 2H), 0.95 (t,  $J$  = 7.4 Hz, 3H).

**$^{13}\text{C}$  NMR (126 MHz,  $\text{CD}_3\text{OD}$ )**  $\delta$  162.5, 150.2, 139.4, 138.9, 138.5, 123.6, 123.5, 122.7, 121.3, 119.2, 67.3, 64.0, 45.9, 30.0, 24.8, 18.3, 12.2.

**HRMS (ESI+),  $m/z$ :** calculated for  $\text{C}_{17}\text{H}_{20}\text{N}_2\text{O}_2\text{S}$   $[\text{M} + \text{Na}]^+$ : 339.1138, found: 339.1114.

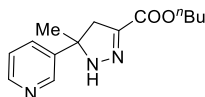

**Butyl 5-methyl-5-(pyridin-3-yl)-4,5-dihydro-1H-pyrazole-3-carboxylate (41d):** Prepared according to the general procedure A, the title compound was prepared from *N*-tosylhydrazone (**41b**) (58.0 mg, 0.2 mmol, 1.0 equiv) and butyl acrylate (**1c**) (44.0  $\mu$ l, 0.3 mmol, 1.5 equiv). Pyrazoline **41d** was obtained after column chromatography (hexane: EtOAc, 3:1) as a colourless oil (30.8 mg, 0.118 mmol, 59%).

**<sup>1</sup>H NMR (500 MHz, CD<sub>3</sub>OD)**  $\delta$  8.63 (d,  $J$  = 2.4 Hz, 1H), 8.45 (d,  $J$  = 6.4 Hz, 1H), 8.00–7.85 (m, 1H), 7.51–7.36 (m, 1H), 4.21 (t,  $J$  = 6.6 Hz, 2H), 3.20 (d,  $J$  = 17.0 Hz, 1H), 2.99 (d,  $J$  = 17.0 Hz, 1H), 1.75–1.64 (m, 2H), 1.59 (s, 3H), 1.43 (dq,  $J$  = 14.8, 7.4 Hz, 2H), 0.96 (t,  $J$  = 7.4 Hz, 3H).

**<sup>13</sup>C NMR (126 MHz, CD<sub>3</sub>OD)**  $\delta$  164.4, 148.7, 147.5, 143.8, 140.5, 135.6, 125.2, 69.7, 65.8, 46.5, 31.9, 27.4, 20.2, 14.0.

**HRMS (ESI+),  $m/z$ :** calculated for C<sub>14</sub>H<sub>19</sub>N<sub>3</sub>O<sub>2</sub> [M + Na]<sup>+</sup>: 284.1369, found: 284.1338.

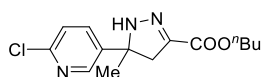

**Butyl 5-(6-chloropyridin-3-yl)-5-methyl-4,5-dihydro-1H-pyrazole-3-carboxylate (42d):** Prepared according to the general procedure A, the title compound was prepared from *N*-tosylhydrazone (**42b**) (65.0 mg, 0.2 mmol, 1.0 equiv) and butyl acrylate (**1c**) (44.0  $\mu$ l, 0.3 mmol, 1.5 equiv). Pyrazoline **42d** was obtained after column chromatography (hexane: EtOAc, 3:1) as a colourless oil (37.2 mg, 0.126 mmol, 63%).

**<sup>1</sup>H NMR (500 MHz, CD<sub>3</sub>OD)**  $\delta$  8.43 (dd,  $J$  = 2.6, 0.7 Hz, 1H), 7.87 (dd,  $J$  = 8.4, 2.6 Hz, 1H), 7.44 (dd,  $J$  = 8.4, 0.7 Hz, 1H), 4.21 (t,  $J$  = 6.6 Hz, 2H), 3.18 (d,  $J$  = 17.0 Hz, 1H), 2.98 (d,  $J$  = 17.1 Hz, 1H), 1.75–1.62 (m, 2H), 1.58 (s, 3H), 1.51–1.38 (m, 2H), 0.95 (t,  $J$  = 7.4 Hz, 3H).

**<sup>13</sup>C NMR (126 MHz, CD<sub>3</sub>OD)**  $\delta$  164.3, 151.0, 148.1, 142.6, 140.7, 138.6, 125.4, 69.3, 65.9, 46.5, 31.9, 27.3, 20.2, 14.1.

**HRMS (ESI+),  $m/z$ :** calculated for C<sub>14</sub>H<sub>18</sub>N<sub>3</sub>O<sub>2</sub> [M + H]<sup>+</sup>: 296.1160, found: 296.1189.

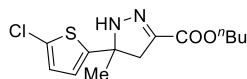

**Butyl 5-(5-chlorothiophen-2-yl)-5-methyl-4,5-dihydro-1H-pyrazole-3-carboxylate (43d):** Prepared according to the general procedure A, the title compound was prepared from *N*-tosylhydrazone (**43b**) (65.6 mg, 0.2 mmol, 1.0 equiv) and butyl acrylate (**1c**) (44.0  $\mu$ l, 0.3 mmol, 1.5 equiv). Pyrazoline **43d** was obtained after column chromatography (hexane: EtOAc, 3:1) as a colourless oil (53.5 mg, 0.178 mmol, 89%).

**<sup>1</sup>H NMR (500 MHz, CD<sub>3</sub>OD)**  $\delta$  6.82 (d,  $J$  = 2.0 Hz, 2H), 4.20 (td,  $J$  = 6.6, 2.0 Hz, 2H), 3.12–2.95 (m, 2H), 1.73–1.61 (m, 2H), 1.60 (s, 3H), 1.42 (qd,  $J$  = 7.5, 1.9 Hz, 2H), 0.95 (td,  $J$  = 7.4, 1.8 Hz, 3H).

**<sup>13</sup>C NMR (126 MHz, CD<sub>3</sub>OD)**  $\delta$  162.3, 148.9, 138.9, 127.9, 125.5, 122.1, 67.0, 64.0, 46.1, 30.0, 24.5, 18.3, 12.2.

**HRMS (ESI<sup>+</sup>),  $m/z$ :** calculated for C<sub>13</sub>H<sub>17</sub>N<sub>2</sub>ClO<sub>2</sub>S [M + Na]<sup>+</sup>: 323.0591, found: 323.0628.

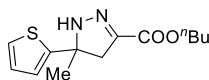

**Butyl 5-methyl-5-(thiophen-2-yl)-4,5-dihydro-1H-pyrazole-3-carboxylate (44d):** Prepared according to the general procedure A, the title compound was prepared from *N*-tosylhydrazone (**44b**) (29.4 mg, 0.1 mmol, 1.0 equiv) and butyl acrylate (**1c**) (22.0  $\mu$ l, 0.15 mmol, 1.5 equiv). Pyrazoline **44d** was obtained after column chromatography (hexane: EtOAc, 3:1) as a colourless oil (41.0 mg, 0.154 mmol, 77%).

**<sup>1</sup>H NMR (500 MHz, CD<sub>3</sub>OD)**  $\delta$  7.28 (dd,  $J$  = 5.1, 1.2 Hz, 1H), 7.05 – 6.91 (m, 2H), 4.21 (t,  $J$  = 6.6 Hz, 2H), 3.06 (d,  $J$  = 1.3 Hz, 2H), 1.73–1.60 (m, 5H), 1.48–1.34 (m, 2H), 0.96 (t,  $J$  = 7.4 Hz, 3H).

**<sup>13</sup>C NMR (126 MHz, CD<sub>3</sub>OD)**  $\delta$  164.4, 151.5, 140.2, 128.0, 125.6, 124.4, 68.9, 65.8, 48.0, 31.9, 27.3, 20.2, 14.1.

**HRMS (ESI<sup>+</sup>),  $m/z$ :** calculated for C<sub>13</sub>H<sub>18</sub>N<sub>2</sub>O<sub>2</sub>S [M + K]<sup>+</sup>: 305.0721, found: 305.0754.

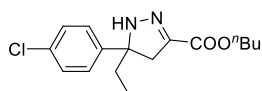

**Butyl 5-(4-chlorophenyl)-5-ethyl-4,5-dihydro-1H-pyrazole-3-carboxylate (45d):** Prepared according to the general procedure A, the title compound was prepared from *N*-tosylhydrazone (**45b**) (67.2 mg, 0.2 mmol, 1.0 equiv) and butyl acrylate (**1c**) (44.0  $\mu$ l, 0.3 mmol, 1.5 equiv). Pyrazoline **45d** was obtained after column chromatography (hexane: EtOAc, 3:1) as a colourless oil (59.3 mg, 0.192 mmol, 96%).

**<sup>1</sup>H NMR (500 MHz, CDCl<sub>3</sub>)**  $\delta$  7.32 (d,  $J$  = 8.6 Hz, 2H), 7.25 (t,  $J$  = 8.0 Hz, 2H), 6.49 (s, 1H), 4.22 (t,  $J$  = 6.8 Hz, 2H), 3.15 (d,  $J$  = 17.1 Hz, 1H), 3.02 (d,  $J$  = 17.2 Hz, 1H), 1.91 (ddd,  $J$  = 50.8, 14.2, 7.2 Hz, 2H), 1.75–1.64 (m, 2H), 1.47–1.31 (m, 2H), 0.93 (t,  $J$  = 7.4 Hz, 3H), 0.78 (t,  $J$  = 7.4 Hz, 3H).

**<sup>13</sup>C NMR (126 MHz, CDCl<sub>3</sub>)**  $\delta$  162.2, 142.4, 140.8, 132.5, 128.3, 126.5, 72.5, 64.6, 44.0, 32.8, 30.2, 18.7, 13.3, 7.8.

**HRMS (ESI+),  $m/z$ :** calculated for C<sub>16</sub>H<sub>21</sub>N<sub>2</sub>O<sub>2</sub>Cl [M + H]<sup>+</sup>: 309.1363, found: 309.1405.

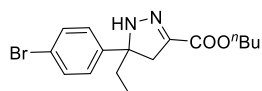

**Butyl 5-(4-bromophenyl)-5-ethyl-4,5-dihydro-1H-pyrazole-3-carboxylate (46d):** Prepared according to the general procedure A, the title compound was prepared from *N*-tosylhydrazone (**46b**) (76.0 mg, 0.2 mmol, 1.0 equiv) and butyl acrylate (**1c**) (44.0  $\mu$ l, 0.3 mmol, 1.5 equiv). Pyrazoline **46d** was obtained after column chromatography (hexane: EtOAc, 3:1) as a colourless oil (64.9 mg, 0.184 mmol, 92%).

**<sup>1</sup>H NMR (500 MHz, CD<sub>3</sub>OD)**  $\delta$  7.49 (d,  $J$  = 8.5 Hz, 2H), 7.27 (d,  $J$  = 8.6 Hz, 2H), 4.18 (t,  $J$  = 6.6 Hz, 2H), 3.17 (d,  $J$  = 17.2 Hz, 1H), 2.97 (d,  $J$  = 17.2 Hz, 1H), 2.00–1.79 (m, 2H), 1.75–1.61 (m, 2H), 1.49–1.32 (m, 2H), 0.95 (t,  $J$  = 7.4 Hz, 3H), 0.79 (t,  $J$  = 7.4 Hz, 3H).

**<sup>13</sup>C NMR (126 MHz, CD<sub>3</sub>OD)**  $\delta$  164.5, 146.0, 139.6, 132.6, 128.8, 121.7, 74.7, 65.7, 44.3, 35.0, 31.9, 20.2, 14.1, 8.7.

**HRMS (ESI+),  $m/z$ :** calculated for C<sub>16</sub>H<sub>21</sub>N<sub>2</sub>O<sub>2</sub>Br [M + H]<sup>+</sup>: 353.0859, found: 353.0867.

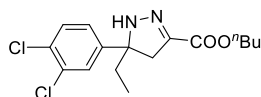

**Butyl 5-(3,4-dichlorophenyl)-5-ethyl-4,5-dihydro-1H-pyrazole-3-carboxylate (47d):** Prepared according to the general procedure A, the title compound was prepared from *N*-tosylhydrazone (**47b**) (74.2 mg, 0.2 mmol, 1.0 equiv) and butyl acrylate (**1c**) (44.0  $\mu$ l, 0.3 mmol, 1.5 equiv). Pyrazoline **47d** was obtained after column chromatography (hexane: EtOAc, 3:1) as a colourless oil (66.5 mg, 0.194 mmol, 97%).

**<sup>1</sup>H NMR (500 MHz, CD<sub>3</sub>OD)**  $\delta$  7.56–7.43 (m, 2H), 7.35–7.22 (m, 1H), 4.27–4.12 (m, 2H), 3.26–3.12 (m, 1H), 2.97 (d,  $J$  = 17.2 Hz, 1H), 1.96–1.78 (m, 2H), 1.70–1.61 (m, 2H), 1.40 (q,  $J$  = 7.7 Hz, 2H), 0.97–0.90 (m, 3H), 0.85–0.72 (m, 3H).

**<sup>13</sup>C NMR (126 MHz, CD<sub>3</sub>OD)**  $\delta$  164.4, 147.6, 139.8, 133.5, 131.8, 131.7, 129.0, 126.8, 74.3, 65.8, 44.4, 35.0, 31.9, 20.2, 14.1, 8.7.

**HRMS (ESI<sup>+</sup>),  $m/z$ :** calculated for C<sub>16</sub>H<sub>20</sub>N<sub>2</sub>O<sub>2</sub>Cl<sub>2</sub> [M + H]<sup>+</sup>: 343.0975, found: 343.1001.

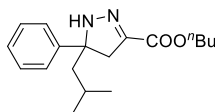

**Butyl 5-isobutyl-5-phenyl-4,5-dihydro-1H-pyrazole-3-carboxylate (48d):** Prepared according to the general procedure A, the title compound was prepared from *N*-tosylhydrazone (**48b**) (66.1 mg, 0.2 mmol, 1.0 equiv) and butyl acrylate (**1c**) (44.0  $\mu$ l, 0.3 mmol, 1.5 equiv). Pyrazoline **48d** was obtained after column chromatography (hexane: EtOAc, 3:1) as a colourless oil (50.2 mg, 0.166 mmol, 83%).

**<sup>1</sup>H NMR (500 MHz, CD<sub>3</sub>OD)**  $\delta$  7.39–7.29 (m, 4H), 7.28–7.16 (m, 1H), 4.18 (t,  $J$  = 6.6 Hz, 2H), 3.13 (d,  $J$  = 17.0 Hz, 1H), 3.04 (d,  $J$  = 16.9 Hz, 1H), 1.88 (dd,  $J$  = 5.9, 1.4 Hz, 2H), 1.69–1.62 (m, 2H), 1.60–1.51 (m, 1H), 1.45–1.37 (m, 2H), 0.94 (t,  $J$  = 7.4 Hz, 3H), 0.82 (d,  $J$  = 6.7 Hz, 3H), 0.70 (d,  $J$  = 6.6 Hz, 3H).

**<sup>13</sup>C NMR (126 MHz, CD<sub>3</sub>OD)**  $\delta$  162.8, 144.6, 137.7, 127.7, 126.1, 124.7, 73.2, 63.8, 49.1, 43.8, 30.0, 23.9, 22.9, 22.5, 18.3, 12.2.

**HRMS (ESI<sup>+</sup>),  $m/z$ :** calculated for C<sub>18</sub>H<sub>26</sub>N<sub>2</sub>O<sub>2</sub> [M + Na]<sup>+</sup>: 325.1886, found: 325.1906.

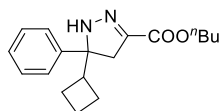

**Butyl 5-cyclobutyl-5-phenyl-4,5-dihydro-1H-pyrazole-3-carboxylate (49d):** Prepared according to the general procedure A, the title compound was prepared from *N*-tosylhydrazone (**49b**) (65.6 mg, 0.2 mmol, 1.0 equiv) and butyl acrylate (**1c**) (44.0  $\mu$ l, 0.3 mmol, 1.5 equiv). Pyrazoline **49d** was obtained after column chromatography (hexane: EtOAc, 3:1) as a colourless oil (46.8 mg, 0.156 mmol, 78%).

**<sup>1</sup>H NMR (500 MHz, CD<sub>3</sub>OD)**  $\delta$  7.36–7.26 (m, 4H), 7.25–7.19 (m, 1H), 4.18 (t,  $J$  = 6.6 Hz, 2H), 3.11 (d,  $J$  = 17.2 Hz, 1H), 2.93 (m, 2H), 1.93–1.74 (m, 4H), 1.72–1.58 (m, 4H), 1.46–1.36 (m, 2H), 0.95 (t,  $J$  = 7.4 Hz, 3H).

**<sup>13</sup>C NMR (126 MHz, CD<sub>3</sub>OD)**  $\delta$  164.7, 146.0, 138.4, 129.5, 128.0, 126.6, 76.0, 65.6, 46.1, 42.8, 31.9, 24.3, 24.0, 20.2, 17.6, 14.1.

**HRMS (ESI<sup>+</sup>),  $m/z$ :** calculated for C<sub>18</sub>H<sub>24</sub>N<sub>2</sub>O<sub>2</sub> [M + Na]<sup>+</sup>: 323.1730, found: 323.1772.

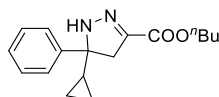

**Butyl 5-cyclopropyl-5-phenyl-4,5-dihydro-1H-pyrazole-3-carboxylate (50d):** Prepared according to the general procedure A, the title compound was prepared from *N*-tosylhydrazone (**50b**) (62.8 mg, 0.2 mmol, 1.0 equiv) and butyl acrylate (**1c**) (44.0  $\mu$ l, 0.3 mmol, 1.5 equiv). Pyrazoline **50d** was obtained after column chromatography (hexane: EtOAc, 3:1) as a colourless oil (43.5 mg, 0.152 mmol, 76%).

**<sup>1</sup>H NMR (500 MHz, CD<sub>3</sub>OD)**  $\delta$  7.40 (tt,  $J$  = 6.8, 1.2 Hz, 3H), 7.35 – 7.31 (m, 2H), 4.19 (t,  $J$  = 6.7 Hz, 2H), 3.22 (d,  $J$  = 17.2 Hz, 1H), 3.08 (d,  $J$  = 17.2 Hz, 1H), 1.74–1.59 (m, 2H), 1.51–1.32 (m, 3H), 0.96 (t,  $J$  = 7.4 Hz, 3H), 0.60–0.36 (m, 2H), 0.39–0.25 (m, 2H).

**<sup>13</sup>C NMR (126 MHz, CD<sub>3</sub>OD)**  $\delta$  164.6, 146.7, 139.3, 129.4, 129.2, 128.2, 127.3, 127.0, 79.3, 73.9, 65.7, 45.3, 31.9, 20.2, 14.1, 2.1, 1.7.

**HRMS (ESI<sup>+</sup>),  $m/z$ :** calculated for C<sub>17</sub>H<sub>22</sub>N<sub>2</sub>O<sub>2</sub> [M + Na]<sup>+</sup>: 309.1573, found: 309.1542.



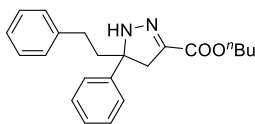

**Butyl 5-phenethyl-5-phenyl-4,5-dihydro-1H-pyrazole-3-carboxylate (51d):** Prepared according to the general procedure A, the title compound was prepared from *N*-tosylhydrazone (**51b**) (75.6 mg, 0.2 mmol, 1.0 equiv) and butyl acrylate (**1c**) (44.0  $\mu$ l, 0.3 mmol, 1.5 equiv). Pyrazoline **51d** was obtained after column chromatography (hexane: EtOAc, 3:1) as a colourless oil (39.2 mg, 0.112 mmol, 56%).

**<sup>1</sup>H NMR (500 MHz, CD<sub>3</sub>OD)**  $\delta$  7.42–7.35 (m, 4H), 7.26 (ddd,  $J$  = 8.6, 5.4, 2.1 Hz, 1H), 7.21 (t,  $J$  = 7.6 Hz, 2H), 7.14–7.06 (m, 3H), 4.18 (t,  $J$  = 6.7 Hz, 2H), 3.22 (d,  $J$  = 17.1 Hz, 1H), 3.03 (d,  $J$  = 17.1 Hz, 1H), 2.59–2.49 (m, 1H), 2.36 (ddd,  $J$  = 13.2, 11.1, 5.4 Hz, 1H), 2.22–2.10 (m, 2H), 1.73–1.57 (m, 2H), 1.48–1.36 (m, 2H), 0.94 (t,  $J$  = 7.4 Hz, 3H).

**<sup>13</sup>C NMR (126 MHz, CD<sub>3</sub>OD)**  $\delta$  164.6, 146.4, 143.0, 139.6, 129.8, 129.5, 129.3, 128.1, 126.9, 126.5, 74.6, 65.7, 44.9, 44.8, 31.9, 31.8, 20.2, 14.1.

**HRMS (ESI+),  $m/z$ :** calculated for C<sub>22</sub>H<sub>26</sub>N<sub>2</sub>O<sub>2</sub> [M + H]<sup>+</sup>: 351.2067, found: 351.2101.

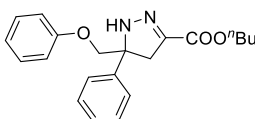

**Butyl 5-(phenoxyethyl)-5-phenyl-4,5-dihydro-1H-pyrazole-3-carboxylate (52d):** Prepared according to the general procedure A, the title compound was prepared from *N*-tosylhydrazone (**52b**) (76.1 mg, 0.2 mmol, 1.0 equiv) and butyl acrylate (**1c**) (44.0  $\mu$ l, 0.3 mmol, 1.5 equiv). Pyrazoline **52d** was obtained after column chromatography (hexane: EtOAc, 3:1) as a colourless oil (39.4 mg, 0.112 mmol, 56%).

**<sup>1</sup>H NMR (500 MHz, CD<sub>3</sub>OD)**  $\delta$  7.52–7.41 (m, 2H), 7.37 (dd,  $J$  = 8.5, 7.0 Hz, 2H), 7.33–7.17 (m, 3H), 6.98–6.80 (m, 3H), 4.22 (t,  $J$  = 6.6 Hz, 2H), 4.17 (d,  $J$  = 2.4 Hz, 2H), 3.45 (d,  $J$  = 17.2 Hz, 1H), 3.06 (d,  $J$  = 17.3 Hz, 1H), 1.76–1.60 (m, 2H), 1.50–1.37 (m, 2H), 0.96 (t,  $J$  = 7.4 Hz, 3H).

**<sup>13</sup>C NMR (126 MHz, CD<sub>3</sub>OD)**  $\delta$  162.5, 158.3, 142.3, 138.5, 128.6, 127.8, 126.6, 125.2, 120.3, 113.9, 72.5, 71.9, 63.9, 40.7, 30.0, 18.3, 12.2.

**HRMS (ESI+),  $m/z$ :** calculated for C<sub>21</sub>H<sub>24</sub>N<sub>2</sub>O<sub>3</sub> [M + H]<sup>+</sup>: 353.1860, found: 353.1895.

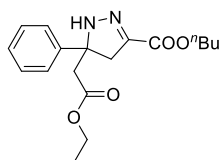

**Butyl 5-(2-methoxy-2-oxoethyl)-5-phenyl-4,5-dihydro-1H-pyrazole-3-carboxylate (53d):** Prepared according to the general procedure A, the title compound was prepared from *N*-tosylhydrazone (**53b**) (72.0 mg, 0.2 mmol, 1.0 equiv) and butyl acrylate (**1c**) (44.0  $\mu$ l, 0.3 mmol, 1.5 equiv). Pyrazoline **53d** was obtained after column chromatography (hexane: EtOAc, 3:1) as a colourless oil (36.5 mg, 0.11 mmol, 55%).

**<sup>1</sup>H NMR (500 MHz, CD<sub>3</sub>OD)**  $\delta$  7.40–7.31 (m, 4H), 7.29–7.23 (m, 1H), 4.20 (t,  $J$  = 6.6 Hz, 2H), 3.96 (q,  $J$  = 7.1 Hz, 2H), 3.41 (d,  $J$  = 17.1 Hz, 1H), 3.00 (d,  $J$  = 17.1 Hz, 1H), 2.95 (d,  $J$  = 2.0 Hz, 2H), 1.71–1.62 (m, 2H), 1.48–1.38 (m, 2H), 1.06 (t,  $J$  = 7.1 Hz, 3H), 0.95 (t,  $J$  = 7.4 Hz, 3H).

**<sup>13</sup>C NMR (126 MHz, CD<sub>3</sub>OD)**  $\delta$  172.0, 164.3, 145.1, 141.0, 129.7, 128.4, 126.6, 72.5, 65.8, 61.7, 45.4, 45.3, 31.9, 20.2, 14.3, 14.1.

**HRMS (ESI<sup>+</sup>),  $m/z$ :** calculated for C<sub>17</sub>H<sub>22</sub>N<sub>2</sub>O<sub>4</sub> [M + H]<sup>+</sup>: 333.1809, found: 333.1848.

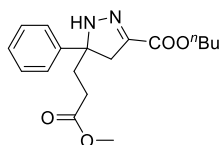

**Butyl 5-(3-methoxy-3-oxopropyl)-5-phenyl-4,5-dihydro-1H-pyrazole-3-carboxylate (54d):**

Prepared according to the general procedure A, the title compound was prepared from *N*-tosylhydrazone (**54b**) (72.1 mg, 0.2 mmol, 1.0 equiv) and butyl acrylate (**1c**) (44.0  $\mu$ l, 0.3 mmol, 1.5 equiv). Pyrazoline **54d** was obtained after column chromatography (hexane: EtOAc, 3:1) as a colourless oil (39.8 mg, 0.12 mmol, 60%).

**<sup>1</sup>H NMR (500 MHz, CD<sub>3</sub>OD)**  $\delta$  7.41–7.22 (m, 5H), 4.18 (t,  $J$  = 6.6 Hz, 2H), 3.58 (s, 3H), 3.19 (d,  $J$  = 17.2 Hz, 1H), 3.02 (d,  $J$  = 17.2 Hz, 1H), 2.34–2.09 (m, 4H), 1.74–1.61 (m, 2H), 1.47–1.37 (m, 2H), 0.95 (t,  $J$  = 7.4 Hz, 3H).

**<sup>13</sup>C NMR (126 MHz, CD<sub>3</sub>OD)**  $\delta$  175.2, 164.5, 145.7, 139.8, 129.8, 128.3, 126.5, 74.0, 65.7, 52.2, 44.7, 37.1, 31.9, 30.2, 20.2, 14.1.

**HRMS (ESI<sup>+</sup>),  $m/z$ :** calculated for C<sub>18</sub>H<sub>24</sub>N<sub>2</sub>O<sub>2</sub> [M + H]<sup>+</sup>: 333.1809, found: 333.1817.

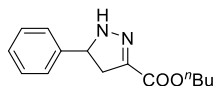

**Butyl 5-methyl-5-phenyl-4,5-dihydro-1H-pyrazole-3-carboxylate (55d):** Prepared according to the general procedure A, the title compound was prepared from *N*-tosylhydrazone (**55b**) (54.8 mg, 0.2 mmol, 1.0 equiv) and butyl acrylate (**1c**) (44.0  $\mu$ l, 0.3 mmol, 1.5 equiv). Pyrazoline **55d** was obtained after column chromatography (hexane: EtOAc, 3:1) as a colourless oil (32.5 mg, 0.132 mmol, 66%).

**<sup>1</sup>H NMR (500 MHz, CD<sub>3</sub>OD)**  $\delta$  7.73–7.61 (m, 2H), 7.46–7.30 (m, 3H), 4.43 (t,  $J$  = 8.8 Hz, 1H), 4.17 (t,  $J$  = 6.6 Hz, 2H), 3.41–3.34 (m, 2H), 1.69–1.60 (m, 2H), 1.40 (dq,  $J$  = 14.8, 7.4 Hz, 2H), 0.93 (t,  $J$  = 7.4 Hz, 3H).

**<sup>13</sup>C NMR (126 MHz, CD<sub>3</sub>OD)**  $\delta$  174.2, 153.6, 133.4, 130.3, 129.7, 127.2, 66.5, 61.8, 37.3, 31.8, 20.1, 14.0.

**HRMS (ESI+),  $m/z$ :** calculated for C<sub>14</sub>H<sub>18</sub>N<sub>2</sub>O<sub>2</sub> [M + H]<sup>+</sup>: 247.1441, found: 247.1471.

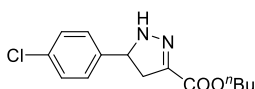

**Butyl 5-(4-chlorophenyl)-5-methyl-4,5-dihydro-1H-pyrazole-3-carboxylate (56d):** Prepared according to the general procedure A, the title compound was prepared from *N*-tosylhydrazone (**56b**) (61.6 mg, 0.2 mmol, 1.0 equiv) and butyl acrylate (**1c**) (44.0  $\mu$ l, 0.3 mmol, 1.5 equiv). Pyrazoline **56d** was obtained after column chromatography (hexane: EtOAc, 3:1) as a colourless oil (34.8 mg, 0.124 mmol, 62%).

**<sup>1</sup>H NMR (500 MHz, CD<sub>3</sub>OD)**  $\delta$  7.63 (d,  $J$  = 8.6 Hz, 2H), 7.38 (d,  $J$  = 8.6 Hz, 2H), 4.44 (t,  $J$  = 8.9 Hz, 1H), 4.16 (t,  $J$  = 6.6 Hz, 2H), 3.34 (d,  $J$  = 8.8 Hz, 2H), 1.71–1.56 (m, 2H), 1.40 (dq,  $J$  = 14.8, 7.4 Hz, 2H), 0.93 (t,  $J$  = 7.4 Hz, 3H).

**<sup>13</sup>C NMR (126 MHz, CD<sub>3</sub>OD)**  $\delta$  174.1, 152.2, 136.0, 132.2, 129.8, 128.6, 66.5, 62.0, 37.0, 31.7, 20.1, 14.0.

**HRMS (ESI+),  $m/z$ :** calculated for C<sub>14</sub>H<sub>17</sub>N<sub>2</sub>O<sub>2</sub> [M + H]<sup>+</sup>: 281.1051, found: 281.1101.

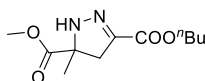

**3-Butyl 5-methyl 5-methyl-4,5-dihydro-1H-pyrazole-3,5-dicarboxylate (57d):** Prepared according to the general procedure A, the title compound was prepared from *N*-tosylhydrazone (**57b**) (54.0 mg, 0.2 mmol, 1.0 equiv) and butyl acrylate (**1c**) (44.0  $\mu$ l, 0.3 mmol, 1.5 equiv). Pyrazoline **57d** was obtained after column chromatography (hexane: EtOAc, 3:1) as a colourless oil (31.4 mg, 0.13 mmol, 65%).

**<sup>1</sup>H NMR (500 MHz, CD<sub>3</sub>OD)**  $\delta$  4.20 (t,  $J$  = 6.6 Hz, 2H), 3.75 (s, 3H), 3.38 (d,  $J$  = 17.4 Hz, 1H), 2.81 (d,  $J$  = 17.4 Hz, 1H), 1.72–1.63 (m, 2H), 1.48 (s, 3H), 1.46–1.38 (m, 2H), 0.96 (t,  $J$  = 7.4 Hz, 3H).

**<sup>13</sup>C NMR (126 MHz, CD<sub>3</sub>OD)**  $\delta$  175.3, 164.0, 71.0, 65.9, 53.3, 42.2, 31.8, 23.9, 20.2, 14.0.

**HRMS (ESI<sup>+</sup>),  $m/z$ :** calculated for C<sub>11</sub>H<sub>18</sub>N<sub>2</sub>O<sub>4</sub> [M + H]<sup>+</sup>: 243.1339, found: 243.1305.

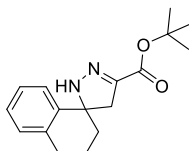

**Tert-butyl 2',3,4,4'-tetrahydro-2H-spiro[naphthalene-1,3'-pyrazole]-5'-carboxylate (58d):**

Prepared according to the general procedure A, the title compound was prepared from *N*-tosylhydrazone (**1b**) (62.8 mg, 0.2 mmol, 1.0 equiv) and butyl acrylate (**58c**) (44.0  $\mu$ l, 0.3 mmol, 1.5 equiv). Spiropyrazoline **58d** was obtained after column chromatography (hexane: EtOAc, 3:1) as a colourless oil (54.9 mg, 0.192 mmol, 96%).

**<sup>1</sup>H NMR (500 MHz, CD<sub>3</sub>OD)**  $\delta$  7.32 (dd,  $J$  = 7.5, 1.8 Hz, 1H), 7.18–7.10 (m, 2H), 7.09–7.03 (m, 1H), 3.07 (d,  $J$  = 17.5 Hz, 1H), 2.96 (d,  $J$  = 17.5 Hz, 1H), 2.79 (t,  $J$  = 5.2 Hz, 2H), 2.04–1.81 (m, 4H), 1.52 (s, 9H).

**<sup>13</sup>C NMR (126 MHz, CD<sub>3</sub>OD)**  $\delta$  162.3, 140.2, 137.2, 135.8, 128.0, 126.4, 126.0, 125.7, 80.6, 67.9, 46.3, 35.1, 28.4, 26.6, 19.1.

**HRMS (ESI<sup>+</sup>),  $m/z$ :** calculated for C<sub>17</sub>H<sub>22</sub>N<sub>2</sub>O<sub>2</sub> [M + H]<sup>+</sup>: 287.1754, found: 287.1774.

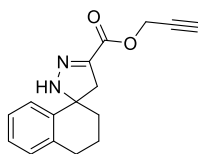

**Prop-2-yn-1-yl 2',3,4,4'-tetrahydro-2H-spiro[naphthalene-1,3'-pyrazole]-5'-carboxylate (59d):**

Prepared according to the general procedure A, the title compound was prepared from *N*-tosylhydrazone (**1b**) (62.8 mg, 0.2 mmol, 1.0 equiv) and butyl acrylate (**59c**) (33.0  $\mu$ l, 0.3 mmol, 1.5 equiv). Spiropyrazoline **59d** was obtained after column chromatography (hexane: EtOAc, 3:1) as a colourless oil (27.9 mg, 0.11 mmol, 55%).

**<sup>1</sup>H NMR (500 MHz, CD<sub>3</sub>OD)**  $\delta$  7.31 (dd,  $J$  = 7.4, 1.9 Hz, 1H), 7.15 (ddd,  $J$  = 6.7, 4.5, 1.8 Hz, 2H), 7.11–7.03 (m, 1H), 4.82 (d,  $J$  = 2.5 Hz, 2H), 3.14 (d,  $J$  = 17.4 Hz, 1H), 3.03 (d,  $J$  = 17.4 Hz, 1H), 2.93 (t,  $J$  = 2.5 Hz, 1H), 2.84–2.76 (m, 2H), 2.04 – 1.83 (m, 4H).

**<sup>13</sup>C NMR (126 MHz, CD<sub>3</sub>OD)**  $\delta$  163.8, 141.8, 137.7, 135.9, 130.0, 128.4, 127.9, 127.7, 78.9, 76.3, 70.2, 52.8, 47.7, 37.0, 30.2, 20.9.

**HRMS (ESI<sup>+</sup>),  $m/z$ :** calculated for C<sub>16</sub>H<sub>16</sub>N<sub>2</sub>O<sub>2</sub> [M + H]<sup>+</sup>: 269.1285, found: 269.1300.

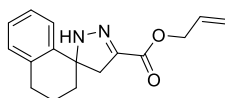

**Allyl 2',3,4,4'-tetrahydro-2H-spiro[naphthalene-1,3'-pyrazole]-5'-carboxylate (60d):** Prepared according to the general procedure A, the title compound was prepared from *N*-tosylhydrazone (**1b**) (62.8 mg, 0.2 mmol, 1.0 equiv) and butyl acrylate (**60c**) (36.0  $\mu$ l, 0.3 mmol, 1.5 equiv). Spiropyrazoline **60d** was obtained after column chromatography (hexane: EtOAc, 3:1) as a colourless oil (42.1 mg, 0.156 mmol, 78%).

**<sup>1</sup>H NMR (500 MHz, CD<sub>3</sub>OD)**  $\delta$  7.31 (dd,  $J$  = 7.3, 1.9 Hz, 1H), 7.21–7.03 (m, 3H), 6.00 (ddt,  $J$  = 17.2, 10.4, 5.7 Hz, 1H), 5.36 (dd,  $J$  = 17.2, 1.6 Hz, 1H), 5.24 (dd,  $J$  = 10.5, 1.4 Hz, 1H), 4.71 (dd,  $J$  = 5.6, 1.5 Hz, 2H), 3.13 (d,  $J$  = 17.4 Hz, 1H), 3.03 (d,  $J$  = 17.4 Hz, 1H), 2.80 (t,  $J$  = 5.1 Hz, 2H), 2.07–1.78 (m, 4H).

**<sup>13</sup>C NMR (126 MHz, CD<sub>3</sub>OD)**  $\delta$  164.4, 141.9, 137.7, 136.9, 133.7, 130.0, 128.4, 127.9, 127.6, 118.5, 70.0, 66.3, 47.8, 37.0, 30.3, 21.0.

**HRMS (ESI<sup>+</sup>),  $m/z$ :** calculated for C<sub>16</sub>H<sub>18</sub>N<sub>2</sub>O<sub>2</sub> [M + H]<sup>+</sup>: 271.1441, found: 271.1450.

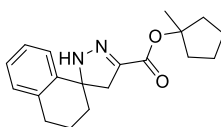

**1-methylcyclopentyl 2',3,4,4'-tetrahydro-2H-spiro[naphthalene-1,3'-pyrazole]-5'-carboxylate (61d):**

Prepared according to the general procedure A, the title compound was prepared from *N*-tosylhydrazone (**1b**) (62.8 mg, 0.2 mmol, 1.0 equiv) and butyl acrylate (**61c**) (51.0  $\mu$ l, 0.3 mmol, 1.5 equiv). Spiropyrazoline **61d** was obtained after column chromatography (hexane: EtOAc, 3:1) as a colourless oil (51.2 mg, 0.164 mmol, 82%).

**<sup>1</sup>H NMR (500 MHz, CD<sub>3</sub>OD)**  $\delta$  7.32 (dd,  $J$  = 7.4, 1.8 Hz, 1H), 7.22–7.01 (m, 3H), 3.07 (d,  $J$  = 17.5 Hz, 1H), 2.96 (d,  $J$  = 17.4 Hz, 1H), 2.79 (s, 2H), 2.30–2.13 (m, 2H), 2.04–1.83 (m, 4H), 1.79–1.71 (m, 4H), 1.61 (s, 5H).

**<sup>13</sup>C NMR (126 MHz, CD<sub>3</sub>OD)**  $\delta$  164.3, 142.0, 138.9, 137.6, 129.9, 128.3, 127.9, 127.6, 92.0, 69.9, 48.1, 40.2, 40.1, 36.9, 30.3, 24.8, 24.8, 21.0.

**HRMS (ESI<sup>+</sup>),  $m/z$ :** calculated for C<sub>19</sub>H<sub>24</sub>N<sub>2</sub>O<sub>2</sub> [M + H]<sup>+</sup>: 313.1911, found: 313.1921.

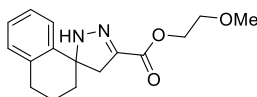

**2-methoxyethyl 2',3,4,4'-tetrahydro-2H-spiro[naphthalene-1,3'-pyrazole]-5'-carboxylate (62d):**

Prepared according to the general procedure A, the title compound was prepared from *N*-tosylhydrazone (**1b**) (62.8 mg, 0.2 mmol, 1.0 equiv) and butyl acrylate (**62c**) (39.0  $\mu$ l, 0.3 mmol, 1.5 equiv). Spiropyrazoline **62d** was obtained after column chromatography (hexane: EtOAc, 3:1) as a colourless oil (46.1 mg, 0.16 mmol, 80%).

**<sup>1</sup>H NMR (500 MHz, CD<sub>3</sub>OD)**  $\delta$  7.32 (dd,  $J$  = 7.3, 2.0 Hz, 1H), 7.21–7.01 (m, 3H), 4.38–4.29 (m, 2H), 3.70–3.62 (m, 2H), 3.31 (s, 3H), 3.14 (d,  $J$  = 17.4 Hz, 1H), 3.03 (d,  $J$  = 17.4 Hz, 1H), 2.89–2.76 (m, 2H), 2.06–1.80 (m, 4H).

**<sup>13</sup>C NMR (126 MHz, CD<sub>3</sub>OD)**  $\delta$  164.7, 141.9, 137.7, 136.8, 129.9, 128.4, 127.9, 127.6, 71.5, 70.0, 64.7, 59.1, 47.8, 37.0, 30.2, 21.0.

**HRMS (ESI<sup>+</sup>),  $m/z$ :** calculated for C<sub>16</sub>H<sub>20</sub>N<sub>2</sub>O<sub>3</sub> [M + H]<sup>+</sup>: 289.1547, found: 289.1560.

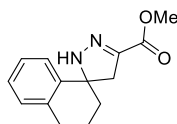

**Methyl 2',3,4,4'-tetrahydro-2H-spiro[naphthalene-1,3'-pyrazole]-5'-carboxylate (63d):** Prepared according to the general procedure A, the title compound was prepared from *N*-tosylhydrazone (**1b**) (62.8 mg, 0.2 mmol, 1.0 equiv) and butyl acrylate (**63c**) (27.0  $\mu$ l, 0.3 mmol, 1.5 equiv). Spiropyrazoline **63d** was obtained after column chromatography (hexane: EtOAc, 3:1) as a colourless oil (41.5 mg, 0.17 mmol, 85%).

**<sup>1</sup>H NMR (500 MHz, CD<sub>3</sub>OD)**  $\delta$  7.31 (dd,  $J$  = 7.1, 2.2 Hz, 1H), 7.21–7.01 (m, 3H), 3.78 (s, 3H), 3.12 (d,  $J$  = 17.4 Hz, 1H), 3.01 (d,  $J$  = 17.5 Hz, 1H), 2.80 (t,  $J$  = 7.0 Hz, 2H), 2.06–1.77 (m, 4H).

**<sup>13</sup>C NMR (126 MHz, CD<sub>3</sub>OD)**  $\delta$  165.2, 141.9, 137.7, 137.0, 130.0, 128.4, 127.9, 127.6, 70.0, 52.2, 36.9, 30.3, 21.0.

**HRMS (ESI<sup>+</sup>),  $m/z$ :** calculated for C<sub>14</sub>H<sub>16</sub>N<sub>2</sub>O<sub>2</sub> [M + K]<sup>+</sup>: 283.0843, found: 283.1832.

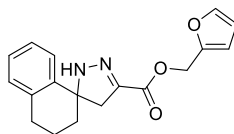

**Furan-2-ylmethyl 2',3,4,4'-tetrahydro-2H-spiro[naphthalene-1,3'-pyrazole]-5'-carboxylate (64d):** Prepared according to the general procedure A, the title compound was prepared from *N*-tosylhydrazone (**1b**) (62.8 mg, 0.2 mmol, 1.0 equiv) and butyl acrylate (**64c**) (40.0  $\mu$ l, 0.3 mmol, 1.5 equiv). Spiropyrazoline **64d** was obtained after column chromatography (hexane: EtOAc, 3:1) as a colourless oil (34.1 mg, 0.11 mmol, 55%).

**<sup>1</sup>H NMR (500 MHz, CD<sub>3</sub>OD)**  $\delta$  7.49 (dd,  $J$  = 1.9, 0.8 Hz, 1H), 7.35–7.24 (m, 1H), 7.22–7.00 (m, 3H), 6.48 (dd,  $J$  = 3.3, 0.7 Hz, 1H), 6.44–6.36 (m, 1H), 5.19 (s, 2H), 3.10 (d,  $J$  = 17.4 Hz, 1H), 2.99 (d,  $J$  = 17.4 Hz, 1H), 2.85–2.71 (m, 2H), 2.05–1.75 (m, 4H).

**<sup>13</sup>C NMR (126 MHz, CD<sub>3</sub>OD)**  $\delta$  164.3, 151.1, 144.6, 141.8, 137.7, 136.5, 129.9, 128.4, 128.0, 127.6, 111.9, 111.7, 70.1, 59.1, 47.8, 36.9, 30.2, 20.9.

**HRMS (ESI<sup>+</sup>),  $m/z$ :** calculated for C<sub>18</sub>H<sub>18</sub>N<sub>2</sub>O<sub>3</sub> [M + H]<sup>+</sup>: 311.1390, found: 311.1403.

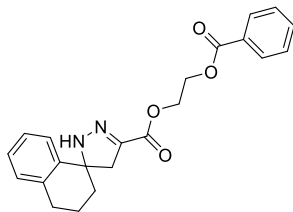

**2-(benzyloxy)ethyl 2',3,4,4'-tetrahydro-2H-spiro[naphthalene-1,3'-pyrazole]-5'-carboxylate**

**(65d):** Prepared according to the general procedure A, the title compound was prepared from *N*-tosylhydrazine (**1b**) (62.8 mg, 0.2 mmol, 1.0 equiv) and butyl acrylate (**65c**) (66.0  $\mu$ l, 0.3 mmol, 1.5 equiv). Spiropyrzoline **65d** was obtained after column chromatography (hexane: EtOAc, 3:1) as a colourless oil (53.7 mg, 0.142 mmol, 71%).

**<sup>1</sup>H NMR (500 MHz, CD<sub>3</sub>OD)**  $\delta$  8.08–8.04 (m, 1H), 8.02–7.98 (m, 2H), 7.60–7.54 (m, 1H), 7.45 (dt,  $J$  = 13.4, 7.8 Hz, 3H), 7.14–7.07 (m, 2H), 4.63–4.50 (m, 4H), 4.42–4.34 (m, 1H), 3.86 (dd,  $J$  = 5.8, 4.0 Hz, 1H), 3.07 (d,  $J$  = 17.4 Hz, 1H), 2.97 (d,  $J$  = 17.4 Hz, 1H), 2.76 (td,  $J$  = 6.8, 5.2, 3.1 Hz, 2H), 2.01–1.70 (m, 4H).

**<sup>13</sup>C NMR (126 MHz, CD<sub>3</sub>OD)**  $\delta$  167.8, 164.5, 141.8, 137.6, 136.7, 134.4, 134.3, 131.2, 130.7, 130.0, 129.6, 129.6, 128.4, 127.9, 127.6, 70.1, 67.6, 64.1, 63.5, 61.2, 47.8, 36.9, 30.2, 21.0.

**HRMS (ESI<sup>+</sup>),  $m/z$ :** calculated for C<sub>22</sub>H<sub>22</sub>N<sub>2</sub>O<sub>4</sub> [M + H]<sup>+</sup>: 379.1652, found: 379.1669.



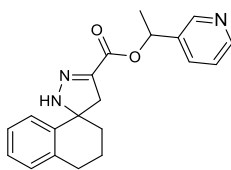

**1-(pyridin-3-yl)ethyl (1R)-2',3,4,4'-tetrahydro-2H-spiro[naphthalene-1,3'-pyrazole]-5'-carboxylate (66d):** Prepared according to the general procedure A, the title compound was prepared from *N*-tosylhydrazone (**1b**) (62.8 mg, 0.2 mmol, 1.0 equiv) and butyl acrylate (**66c**) (53.0  $\mu$ l, 0.3 mmol, 1.5 equiv). Spiropyrazoline **66d** was obtained after column chromatography (hexane: EtOAc, 3:1) as a colourless oil (37.5 mg, 0.112 mmol, 56%).

**<sup>1</sup>H NMR (500 MHz, CD<sub>3</sub>OD)**  $\delta$  8.62 (dd,  $J$  = 7.9, 2.3 Hz, 1H), 8.48 (td,  $J$  = 5.0, 1.6 Hz, 1H), 8.01–7.89 (m, 1H), 7.45 (td,  $J$  = 7.2, 4.9 Hz, 1H), 7.38–7.26 (m, 1H), 7.23–7.11 (m, 2H), 7.12–7.00 (m, 1H), 6.05 (q,  $J$  = 6.6 Hz, 1H), 3.14 (d,  $J$  = 17.4 Hz, 1H), 3.03 (d,  $J$  = 17.4 Hz, 1H), 2.81 (q,  $J$  = 4.4 Hz, 2H), 2.04–1.81 (m, 4H), 1.64 (dd,  $J$  = 6.7, 5.1 Hz, 3H).

**<sup>13</sup>C NMR (126 MHz, CD<sub>3</sub>OD)**  $\delta$  163.8, 149.5, 148.3, 141.9, 139.7, 137.7, 136.5, 136.1, 129.9, 128.4, 127.9, 127.6, 125.3, 71.7, 70.1, 47.7, 37.0, 30.2, 22.4, 21.0.

**HRMS (ESI+),  $m/z$ :** calculated for C<sub>20</sub>H<sub>21</sub>N<sub>3</sub>O<sub>2</sub> [M + H]<sup>+</sup>: 336.1707, found: 336.1726.

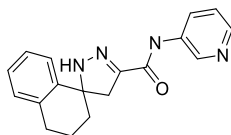

**(Pyridin-3-yl-12-azanyl)(2',3,4,4'-tetrahydro-2H-spiro[naphthalene-1,3'-pyrazol]-5'-yl)methanone (67d):** Prepared according to the general procedure A, the title compound was prepared from *N*-tosylhydrazone (**1b**) (62.8 mg, 0.2 mmol, 1.0 equiv) and butyl acrylate (**68c**) (44.0  $\mu$ l, 0.3 mmol, 1.5 equiv). Spiropyrazoline **67d** was obtained after column chromatography (hexane: EtOAc, 3:1) as a colourless oil (52.0 mg, 0.17 mmol, 85%).

**<sup>1</sup>H NMR (500 MHz, CD<sub>3</sub>OD)**  $\delta$  8.86 (d,  $J$  = 2.5 Hz, 1H), 8.32–8.11 (m, 2H), 7.47–7.32 (m, 2H), 7.22–7.00 (m, 3H), 3.19 (d,  $J$  = 17.4 Hz, 1H), 3.08 (d,  $J$  = 17.3 Hz, 1H), 2.81 (d,  $J$  = 5.4 Hz, 2H), 2.11–1.81 (m, 4H).

**<sup>13</sup>C NMR (126 MHz, CD<sub>3</sub>OD)**  $\delta$  164.0, 144.8, 142.2, 142.1, 140.9, 137.7, 137.4, 130.0, 129.1, 128.4, 127.9, 127.6, 125.2, 70.1, 47.4, 37.0, 30.3, 21.1.

**HRMS (ESI+),  $m/z$ :** calculated for C<sub>18</sub>H<sub>17</sub>N<sub>4</sub>O<sub>2</sub> [M + H]<sup>+</sup>: 306.1475, found: 306.1454.

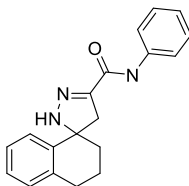

**(Phenyl-12-azanyl)(2',3,4,4'-tetrahydro-2H-spiro[naphthalene-1,3'-pyrazol]-5'-yl)methanone**

**(68d):** Prepared according to the general procedure A, the title compound was prepared from *N*-tosylhydrazone (**1b**) (62.8 mg, 0.2 mmol, 1.0 equiv) and butyl acrylate (**69c**) (44.0 mg, 0.3 mmol, 1.5 equiv). Spiropyrazoline **68d** was obtained after column chromatography (hexane: EtOAc, 3:1) as a colourless oil (31.7 mg, 0.104 mmol, 52%).

**<sup>1</sup>H NMR (500 MHz, CD<sub>3</sub>OD)** δ 7.68–7.59 (m, 2H), 7.40 (dd, *J* = 7.5, 1.8 Hz, 1H), 7.31 (dd, *J* = 8.6, 7.4 Hz, 2H), 7.17–7.05 (m, 4H), 3.18 (d, *J* = 17.4 Hz, 1H), 3.07 (d, *J* = 17.4 Hz, 1H), 2.88–2.78 (m, 2H), 2.07–1.84 (m, 4H).

**<sup>13</sup>C NMR (126 MHz, CD<sub>3</sub>OD)** δ 161.6, 140.3, 140.0, 137.7, 135.8, 128.0, 127.9, 126.4, 126.0, 125.7, 123.2, 119.5, 68.0, 45.7, 35.1, 28.4, 19.2.

**HRMS (ESI<sup>+</sup>), *m/z*:** calculated for C<sub>19</sub>H<sub>18</sub>N<sub>3</sub>O<sub>2</sub> [*M* + H]<sup>+</sup>: 305.1523, found: 305.1550.

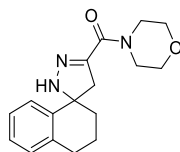

**Morpholino(2',3,4,4'-tetrahydro-2H-spiro[naphthalene-1,3'-pyrazol]-5'-yl)methanone (69d):**

Prepared according to the general procedure A, the title compound was prepared from *N*-tosylhydrazone (**1b**) (62.8 mg, 0.2 mmol, 1.0 equiv) and butyl acrylate (**70c**) (39.0 μl, 0.3 mmol, 1.5 equiv). Spiropyrazoline **69d** was obtained after column chromatography (hexane: EtOAc, 3:1) as a colourless oil (49.0 mg, 0.164 mmol, 82%).

**<sup>1</sup>H NMR (500 MHz, CD<sub>3</sub>OD)** δ 7.39 (dd, *J* = 7.4, 2.0 Hz, 1H), 7.20–7.09 (m, 2H), 7.10–7.01 (m, 1H), 4.28–3.92 (m, 2H), 3.71 (t, *J* = 4.6 Hz, 6H), 3.15 (d, *J* = 17.4 Hz, 1H), 3.09 (d, *J* = 17.3 Hz, 1H), 2.86–2.75 (m, 2H), 2.03–1.83 (m, 4H).

**<sup>13</sup>C NMR (126 MHz, CD<sub>3</sub>OD)** δ 164.6, 142.6, 142.2, 137.9, 129.9, 128.2, 127.8, 127.5, 68.1, 67.9, 50.2, 36.8, 30.8, 30.4, 21.2.

**HRMS (ESI<sup>+</sup>), *m/z*:** calculated for C<sub>17</sub>H<sub>21</sub>N<sub>3</sub>O<sub>2</sub> [*M* + H]<sup>+</sup>: 300.1707, found: 300.1739.

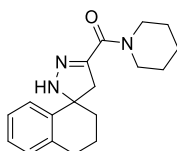

**Piperidin-1-yl(2',3,4,4'-tetrahydro-2H-spiro[naphthalene-1,3'-pyrazol]-5'-yl)methanone (70d):**

Prepared according to the general procedure A, the title compound was prepared from *N*-tosylhydrazone (**1b**) (62.8 mg, 0.2 mmol, 1.0 equiv) and butyl acrylate (**71c**) (42.0 mg, 0.3 mmol, 1.5 equiv). Spiropyrzoline **70d** was obtained after column chromatography (hexane: EtOAc, 3:1) as a colourless oil (45.2 mg, 0.152 mmol, 76%).

**<sup>1</sup>H NMR (500 MHz, CD<sub>3</sub>OD)** δ 7.42 (dd, *J* = 7.4, 1.8 Hz, 1H), 7.19–7.02 (m, 3H), 3.93 (s, 2H), 3.63 (s, 2H), 3.17–3.03 (m, 2H), 2.80 (dd, *J* = 5.8, 3.2 Hz, 2H), 2.04–1.80 (m, 4H), 1.74–1.58 (m, 6H).

**<sup>13</sup>C NMR (126 MHz, CD<sub>3</sub>OD)** δ 162.8, 141.7, 140.4, 136.0, 128.0, 126.3, 125.9, 125.6, 66.0, 48.6, 46.1, 34.9, 28.5, 23.8, 19.4, 7.4.

**HRMS (ESI<sup>+</sup>), *m/z*:** calculated for C<sub>18</sub>H<sub>23</sub>N<sub>3</sub>O [M + H]<sup>+</sup>: 298.1914, found: 298.1926.

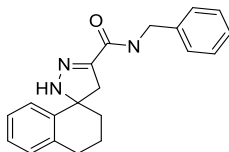

**(Benzyl-12-azanyl)(2',3,4,4'-tetrahydro-2H-spiro[naphthalene-1,3'-pyrazol]-5'-yl)methanone (71d):**

Prepared according to the general procedure A, the title compound was prepared from *N*-tosylhydrazone (**1b**) (62.8 mg, 0.2 mmol, 1.0 equiv) and butyl acrylate (**72c**) (48.3 mg, 0.3 mmol, 1.5 equiv). Spiropyrzoline **71d** was obtained after column chromatography (hexane: EtOAc, 3:1) as a colourless oil (39.6 mg, 0.124 mmol, 62%).

**<sup>1</sup>H NMR (500 MHz, CD<sub>3</sub>OD)** δ 7.37 (dd, *J* = 7.3, 2.0 Hz, 1H), 7.32 (d, *J* = 5.2 Hz, 4H), 7.24 (dt, *J* = 5.1, 2.8 Hz, 1H), 7.18–7.10 (m, 2H), 7.10–7.03 (m, 1H), 4.47 (d, *J* = 1.0 Hz, 2H), 3.13 (d, *J* = 17.5 Hz, 1H), 3.02 (d, *J* = 17.5 Hz, 1H), 2.80 (t, *J* = 4.7 Hz, 2H), 2.03–1.82 (m, 4H).

**<sup>13</sup>C NMR (126 MHz, CD<sub>3</sub>OD)** δ 165.4, 142.2, 142.1, 140.3, 137.7, 129.9, 129.5, 128.5, 128.2, 128.2, 127.9, 127.5, 69.6, 47.9, 43.8, 37.0, 30.3, 21.1.

**HRMS (ESI<sup>+</sup>), *m/z*:** calculated for C<sub>20</sub>H<sub>20</sub>N<sub>3</sub>O [M + H]<sup>+</sup>: 319.1679, found: 319.1690.

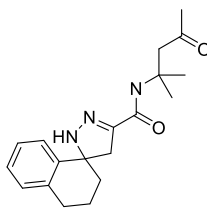

**4-methyl-4-((2',3,4,4'-tetrahydro-2H-spiro[naphthalene-1,3'-pyrazole]-5'-carbonyl)-12-**

**azanyl)pentan-2-one (72d):** Prepared according to the general procedure A, the title compound was prepared from *N*-tosylhydrazone (**1b**) (62.8 mg, 0.2 mmol, 1.0 equiv) and butyl acrylate (**73c**) (50.8 mg, 0.3 mmol, 1.5 equiv). Spiropyrazoline **72d** was obtained after column chromatography (hexane: EtOAc, 3:1) as a colourless oil (29.4 mg, 0.09 mmol, 45%).

**<sup>1</sup>H NMR (500 MHz, CD<sub>3</sub>OD)**  $\delta$  7.42–7.29 (m, 1H), 7.21–7.00 (m, 3H), 3.06 (d,  $J$  = 17.5 Hz, 1H), 3.03 (s, 2H), 2.95 (d,  $J$  = 17.5 Hz, 1H), 2.79 (t,  $J$  = 4.8 Hz, 2H), 2.13 (s, 3H), 2.00–1.79 (m, 4H), 1.44 (s, 6H).

**<sup>13</sup>C NMR (126 MHz, CD<sub>3</sub>OD)**  $\delta$  210.1, 164.8, 142.9, 142.2, 137.7, 129.9, 128.2, 127.9, 127.5, 69.7, 53.3, 52.2, 47.6, 36.9, 31.7, 30.3, 27.6, 21.1.

**HRMS (ESI<sup>+</sup>),  $m/z$ :** calculated for C<sub>19</sub>H<sub>24</sub>N<sub>3</sub>O<sub>2</sub> [M + H]<sup>+</sup>: 327.1941, found: 327.1968.

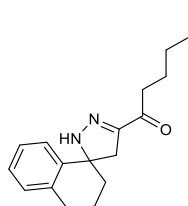

**1-(2',3,4,4'-tetrahydro-2H-spiro[naphthalene-1,3'-pyrazol]-5'-yl)hexan-1-one (73d):** Prepared according to the general procedure A, the title compound was prepared from *N*-tosylhydrazone (**1b**) (62.8 mg, 0.2 mmol, 1.0 equiv) and butyl acrylate (**74c**) (46.0  $\mu$ l, 0.3 mmol, 1.5 equiv). Spiropyrazoline **73d** was obtained after column chromatography (hexane: EtOAc, 3:1) as a colourless oil (30.1 mg, 0.106 mmol, 53%).

**<sup>1</sup>H NMR (500 MHz, CD<sub>3</sub>OD)**  $\delta$  7.26–7.18 (m, 1H), 7.18–7.11 (m, 2H), 7.11–7.02 (m, 1H), 3.04 (d,  $J$  = 17.2 Hz, 1H), 2.93 (d,  $J$  = 17.1 Hz, 1H), 2.81 (dd,  $J$  = 7.6, 3.3 Hz, 4H), 2.01–1.83 (m, 4H), 1.65 (p,  $J$  = 7.4 Hz, 2H), 1.35 (ddd,  $J$  = 9.0, 7.2, 4.9 Hz, 4H), 0.92 (t,  $J$  = 7.0 Hz, 3H).

**<sup>13</sup>C NMR (126 MHz, CD<sub>3</sub>OD)**  $\delta$  199.3, 145.0, 141.9, 137.6, 130.0, 128.4, 127.8, 127.7, 70.4, 46.2, 38.2, 37.2, 32.8, 30.2, 26.3, 23.6, 21.0, 14.4.

**HRMS (ESI<sup>+</sup>),  $m/z$ :** calculated for C<sub>18</sub>H<sub>24</sub>N<sub>2</sub>O<sub>2</sub> [M + H]<sup>+</sup>: 285.1968, found: 285.1961.

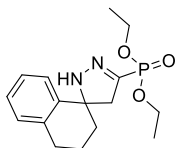

**Diethyl (2',3,4,4'-tetrahydro-2H-spiro[naphthalene-1,3'-pyrazol]-5'-yl)phosphonate (74d):**

Prepared according to the general procedure A, the title compound was prepared from *N*-tosylhydrazone (**1b**) (62.8 mg, 0.2 mmol, 1.0 equiv) and butyl acrylate (**75c**) (48.0  $\mu$ l, 0.3 mmol, 1.5 equiv). Spiropyrazoline **74d** was obtained after column chromatography (hexane: EtOAc, 3:1) as a colourless oil (49.6 mg, 0.154 mmol, 77%).

**<sup>1</sup>H NMR (500 MHz, CD<sub>3</sub>OD)**  $\delta$  7.35–7.31 (m, 1H), 7.23–7.01 (m, 3H), 4.17 (ddd,  $J$  = 8.1, 7.0, 2.3 Hz, 4H), 3.07 (dd,  $J$  = 17.1, 1.3 Hz, 1H), 2.97 (dd,  $J$  = 17.2, 1.4 Hz, 1H), 2.80 (p,  $J$  = 4.3 Hz, 2H), 2.04–1.79 (m, 4H), 1.35 (td,  $J$  = 7.1, 3.1 Hz, 6H).

**<sup>13</sup>C NMR (126 MHz, CD<sub>3</sub>OD)**  $\delta$  141.9, 137.8, 131.3, 130.0, 129.4, 128.4, 127.7, 127.5, 69.0, 64.2, 50.6, 36.6, 30.3, 21.2, 16.7.

**HRMS (ESI<sup>+</sup>),  $m/z$ :** calculated for C<sub>16</sub>H<sub>23</sub>N<sub>2</sub>O<sub>3</sub>P [M + H]<sup>+</sup>: 323.1519, found: 323.1565.

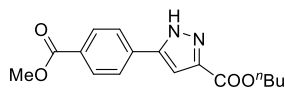

**Butyl 5-(4-(methoxycarbonyl)phenyl)-1H-pyrazole-3-carboxylate (77d):** Prepared according to the general procedure B, the title compound was prepared from *N*-tosylhydrazone (**77b**) (66.4 mg, 0.2 mmol, 1.0 equiv) and butyl acrylate (**1c**) (44.0  $\mu$ l, 0.3 mmol, 1.5 equiv). Pyrazole **77d** was obtained after column chromatography (hexane: EtOAc, 3:1) as a colourless oil (39.3 mg, 0.13 mmol, 65%).

**<sup>1</sup>H NMR (500 MHz, CDCl<sub>3</sub>)**  $\delta$  8.13–8.09 (m, 2H), 7.88 (d,  $J$  = 8.5 Hz, 2H), 7.19 (s, 1H), 4.37 (t,  $J$  = 6.7 Hz, 2H), 3.94 (s, 4H), 1.77 (dt,  $J$  = 14.5, 6.7 Hz, 2H), 1.48 (dq,  $J$  = 14.8, 7.4 Hz, 2H), 0.99 (t,  $J$  = 7.4 Hz, 3H).

**<sup>13</sup>C NMR (126 MHz, CDCl<sub>3</sub>)**  $\delta$  168.2, 161.2, 137.4, 131.6, 131.6, 131.3, 127.0, 121.4, 107.7, 66.9, 53.6, 32.1, 20.6, 15.1.

**HRMS (ESI<sup>+</sup>),  $m/z$ :** calculated for C<sub>16</sub>H<sub>18</sub>N<sub>2</sub>O<sub>4</sub> [M + H]<sup>+</sup>: 303.1339, found: 303.1355.

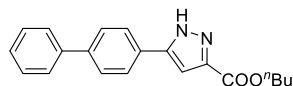

**Butyl 5-([1,1'-biphenyl]-4-yl)-1H-pyrazole-3-carboxylate (78d):** Prepared according to the general procedure B, the title compound was prepared from *N*-tosylhydrazone (**78b**) (64.0 mg, 0.2 mmol, 1.0 equiv) and butyl acrylate (**1c**) (44.0  $\mu$ l, 0.3 mmol, 1.5 equiv). Pyrazole **78d** was obtained after column chromatography (hexane: EtOAc, 3:1) as a white solid (25.6 mg, 0.08 mmol, 40%).

**<sup>1</sup>H NMR (500 MHz, CDCl<sub>3</sub>)**  $\delta$  7.85 (d,  $J$  = 8.1 Hz, 2H), 7.69–7.61 (m, 4H), 7.46 (t,  $J$  = 7.6 Hz, 2H), 7.40–7.35 (m, 1H), 7.14 (s, 1H), 4.35 (t,  $J$  = 6.7 Hz, 2H), 1.75 (p,  $J$  = 6.9 Hz, 2H), 1.55–1.38 (m, 2H), 0.97 (t,  $J$  = 7.4 Hz, 3H).

**<sup>13</sup>C NMR (126 MHz, CDCl<sub>3</sub>)**  $\delta$  161.9, 142.8, 141.9, 130.3, 130.2, 129.0, 128.9, 128.8, 128.4, 127.5, 107.0, 66.7, 32.1, 20.6, 15.2.

**HRMS (ESI<sup>+</sup>),  $m/z$ :** calculated for C<sub>20</sub>H<sub>20</sub>N<sub>2</sub>O<sub>2</sub> [M + H]<sup>+</sup>: 321.1598, found: 321.1615.

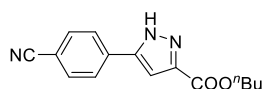

**Butyl 5-(4-cyanophenyl)-1H-pyrazole-3-carboxylate (79d):** Prepared according to the general procedure B, the title compound was prepared from *N*-tosylhydrazone (**79b**) (60.0 mg, 0.2 mmol, 1.0 equiv) and butyl acrylate (**1c**) (44.0  $\mu$ l, 0.3 mmol, 1.5 equiv). Pyrazole **79d** was obtained after column chromatography (hexane: EtOAc, 3:1) as a white solid (28.0 mg, 0.104 mmol, 52%).

**<sup>1</sup>H NMR (500 MHz, CDCl<sub>3</sub>)**  $\delta$  7.99–7.91 (m, 2H), 7.76–7.67 (m, 2H), 7.19 (s, 1H), 4.38 (t,  $J$  = 6.6 Hz, 2H), 1.77 (dt,  $J$  = 14.6, 6.8 Hz, 2H), 1.48 (h,  $J$  = 7.4 Hz, 2H), 0.99 (t,  $J$  = 7.4 Hz, 3H).

**<sup>13</sup>C NMR (126 MHz, CDCl<sub>3</sub>)**  $\delta$  161.0, 137.8, 134.1, 127.6, 120.2, 113.2, 107.8, 67.1, 32.0, 20.6, 15.1.

**HRMS (ESI<sup>+</sup>),  $m/z$ :** calculated for C<sub>15</sub>H<sub>15</sub>N<sub>3</sub>O<sub>2</sub> [M + H]<sup>+</sup>: 270.1237, found: 270.1254.

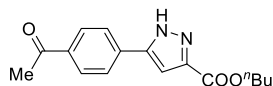

**Butyl 5-(4-acetylphenyl)-1H-pyrazole-3-carboxylate (80d):** Prepared according to the general procedure B, the title compound was prepared from *N*-tosylhydrazone (**80b**) (57.2 mg, 0.2 mmol, 1.0 equiv) and butyl acrylate (**1c**) (44.0  $\mu$ l, 0.3 mmol, 1.5 equiv). Pyrazole **80d** was obtained after column chromatography (hexane: EtOAc, 3:1) as a colourless oil (21.7 mg, 0.76 mmol, 38%).

**<sup>1</sup>H NMR (500 MHz, CDCl<sub>3</sub>)**  $\delta$  8.05–8.00 (m, 2H), 7.95–7.89 (m, 2H), 7.19 (s, 1H), 4.37 (t,  $J$  = 6.7 Hz, 2H), 2.64 (d,  $J$  = 1.0 Hz, 3H), 1.77 (p,  $J$  = 6.8 Hz, 2H), 1.48 (h,  $J$  = 7.4 Hz, 2H), 0.99 (t,  $J$  = 7.4 Hz, 3H).

**<sup>13</sup>C NMR (126 MHz, CDCl<sub>3</sub>)**  $\delta$  199.0, 174.1, 161.3, 138.2, 137.4, 130.4, 127.2, 121.4, 107.7, 66.9, 32.1, 28.1, 20.6, 15.1.

**HRMS (ESI+),  $m/z$ :** calculated for C<sub>16</sub>H<sub>18</sub>N<sub>2</sub>O<sub>3</sub> [M + H]<sup>+</sup>: 287.1390, found: 287.1437.

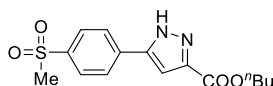

**Butyl 5-(4-(methylsulfonyl)phenyl)-1H-pyrazole-3-carboxylate (81d):** Prepared according to the general procedure B, the title compound was prepared from *N*-tosylhydrazone (**81b**) (70.4 mg, 0.2 mmol, 1.0 equiv) and butyl acrylate (**1c**) (44.0  $\mu$ l, 0.3 mmol, 1.5 equiv). Pyrazole **81d** was obtained after column chromatography (hexane: EtOAc, 3:1) as a white solid (30.2 mg, 0.094 mmol, 47%).

**<sup>1</sup>H NMR (500 MHz, CDCl<sub>3</sub>)**  $\delta$  8.01 (q,  $J$  = 8.6 Hz, 4H), 7.20 (s, 1H), 4.37 (t,  $J$  = 6.7 Hz, 2H), 3.09 (s, 3H), 1.84–1.71 (m, 3H), 1.49 (dt,  $J$  = 15.1, 7.4 Hz, 3H), 0.99 (t,  $J$  = 7.4 Hz, 3H).

**<sup>13</sup>C NMR (126 MHz, CDCl<sub>3</sub>)**  $\delta$  160.4, 141.3, 141.0, 129.4, 127.8, 121.4, 118.6, 107.8, 66.9, 46.0, 32.1, 20.6, 15.1.

**HRMS (ESI+),  $m/z$ :** calculated for C<sub>15</sub>H<sub>18</sub>N<sub>2</sub>O<sub>4</sub>S [M + Na]<sup>+</sup>: 345.0879, found: 345.0870.

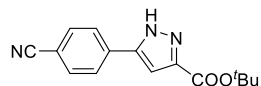

**Tert-butyl 5-(4-cyanophenyl)-1H-pyrazole-3-carboxylate (82d):** Prepared according to the general procedure B, the title compound was prepared from *N*-tosylhydrazone (**79b**) (60.0 mg, 0.2 mmol, 1.0 equiv) and butyl acrylate (**58c**) (44.0  $\mu$ l, 0.3 mmol, 1.5 equiv). Pyrazole **82d** was obtained after column chromatography (hexane: EtOAc, 3:1) as a colourless oil (27.5 mg, 0.102 mmol, 51%).

**<sup>1</sup>H NMR (500 MHz, CDCl<sub>3</sub>)**  $\delta$  7.96 (d,  $J$  = 8.5 Hz, 2H), 7.72 (d,  $J$  = 8.4 Hz, 2H), 7.12 (s, 1H), 1.63 (s, 9H).

**<sup>13</sup>C NMR (126 MHz, CDCl<sub>3</sub>)**  $\delta$  160.1, 134.1, 134.1, 130.7, 127.6, 121.4, 120.3, 113.0, 107.6, 84.7, 29.6.

**HRMS (ESI<sup>+</sup>),  $m/z$ :** calculated for C<sub>15</sub>H<sub>15</sub>N<sub>3</sub>O<sub>2</sub> [M + H]<sup>+</sup>: 270.1237, found: 270.1254.

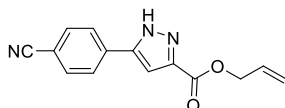

**Allyl 5-(4-cyanophenyl)-1H-pyrazole-3-carboxylate (83d):** Prepared according to the general procedure B, the title compound was prepared from *N*-tosylhydrazone (**79b**) (60.0 mg, 0.2 mmol, 1.0 equiv) and butyl acrylate (**60c**) (44.0  $\mu$ l, 0.3 mmol, 1.5 equiv). Pyrazole **83d** was obtained after column chromatography (hexane: EtOAc, 3:1) as a colourless oil (16.7 mg, 0.66 mmol, 33%).

**<sup>1</sup>H NMR (500 MHz, CDCl<sub>3</sub>)**  $\delta$  7.94 (d,  $J$  = 8.4 Hz, 2H), 7.73 (d,  $J$  = 8.4 Hz, 2H), 7.22 (s, 1H), 6.10–5.99 (m, 1H), 5.49–5.32 (m, 2H), 4.87 (d,  $J$  = 5.9 Hz, 2H).

**<sup>13</sup>C NMR (126 MHz, CDCl<sub>3</sub>)**  $\delta$  160.4, 137.7, 134.1, 133.7, 132.7, 131.2, 127.6, 121.0, 120.2, 113.3, 108.0, 67.6.

**HRMS (ESI<sup>+</sup>),  $m/z$ :** calculated for C<sub>14</sub>H<sub>11</sub>N<sub>3</sub>O<sub>2</sub> [M + H]<sup>+</sup>: 254.092 4, found: 254.0950.



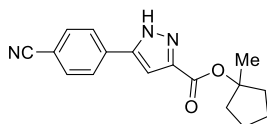

**1-methylcyclopentyl 5-(4-cyanophenyl)-1H-pyrazole-3-carboxylate (84d):** Prepared according to the general procedure B, the title compound was prepared from *N*-tosylhydrazone (**79b**) (60.0 mg, 0.2 mmol, 1.0 equiv) and butyl acrylate (**61c**) (44.0  $\mu$ l, 0.3 mmol, 1.5 equiv). Pyrazole **84d** was obtained after column chromatography (hexane: EtOAc, 3:1) as a colourless oil (36.0 mg, 0.102 mmol, 61%).

**<sup>1</sup>H NMR (500 MHz, CDCl<sub>3</sub>)**  $\delta$  7.95 (d,  $J$  = 8.5 Hz, 2H), 7.72 (d,  $J$  = 8.6 Hz, 2H), 7.12 (s, 1H), 2.35–2.22 (m, 2H), 1.82 (dddd,  $J$  = 13.5, 11.5, 4.7, 2.7 Hz, 4H), 1.71 (s, 5H).

**<sup>13</sup>C NMR (126 MHz, CDCl<sub>3</sub>)**  $\delta$  160.1, 138.1, 134.1, 133.8, 130.7, 127.6, 120.3, 113.1, 107.5, 94.2, 40.7, 25.8, 25.2.

**HRMS (ESI<sup>+</sup>),  $m/z$ :** calculated for C<sub>17</sub>H<sub>17</sub>N<sub>3</sub>O<sub>2</sub> [M + H]<sup>+</sup>: 296.1394, found: 296.1380.

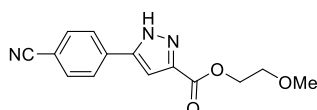

**2-methoxyethyl 5-(4-cyanophenyl)-1H-pyrazole-3-carboxylate (85d):** Prepared according to the general procedure B, the title compound was prepared from *N*-tosylhydrazone (**79b**) (60.0 mg, 0.2 mmol, 1.0 equiv) and butyl acrylate (**62c**) (39.0  $\mu$ l, 0.3 mmol, 1.5 equiv). Pyrazole **83d** was obtained after column chromatography (hexane: EtOAc, 3:1) as a white solid (24.4 mg, 0.09 mmol, 45%).

**<sup>1</sup>H NMR (500 MHz, CDCl<sub>3</sub>)**  $\delta$  7.92 (d,  $J$  = 8.4 Hz, 2H), 7.72 (d,  $J$  = 8.4 Hz, 2H), 7.24 (s, 1H), 4.55–4.50 (m, 2H), 3.77–3.71 (m, 2H), 3.45 (s, 3H).

**<sup>13</sup>C NMR (126 MHz, CDCl<sub>3</sub>)**  $\delta$  160.4, 142.7, 137.9, 134.1, 127.6, 121.4, 120.2, 113.2, 108.2, 71.7, 65.7, 60.5.

**HRMS (ESI<sup>+</sup>),  $m/z$ :** calculated for C<sub>14</sub>H<sub>13</sub>N<sub>3</sub>O<sub>2</sub> [M + H]<sup>+</sup>: 272.1030, found: 272.1055.

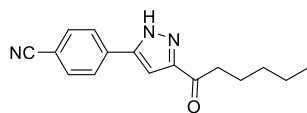

**4-(3-hexanoyl-1H-pyrazol-5-yl)benzonitrile (86d):** Prepared according to the general procedure B, the title compound was prepared from *N*-tosylhydrazone (**79b**) (60.0 mg, 0.2 mmol, 1.0 equiv) and butyl acrylate (**74c**) (46.0  $\mu$ l, 0.3 mmol, 1.5 equiv). Pyrazole **83d** was obtained after column chromatography (hexane: EtOAc, 3:1) as a white solid (20.8 mg, 0.078 mmol, 39%).

**<sup>1</sup>H NMR (500 MHz, CDCl<sub>3</sub>)**  $\delta$  7.94 (d,  $J$  = 8.4 Hz, 2H), 7.73 (d,  $J$  = 8.5 Hz, 2H), 7.14 (s, 1H), 2.92 (t,  $J$  = 7.5 Hz, 2H), 1.78 (dt,  $J$  = 11.9, 6.0 Hz, 2H), 1.38 (dd,  $J$  = 10.4, 4.1 Hz, 4H), 0.98–0.89 (m, 3H).

**<sup>13</sup>C NMR (126 MHz, CDCl<sub>3</sub>)**  $\delta$  193.2, 152.0, 137.8, 134.1, 128.7, 127.5, 120.2, 113.3, 106.9, 41.0, 32.8, 25.2, 23.9, 15.4.

**HRMS (ESI<sup>+</sup>),  $m/z$ :** calculated for C<sub>16</sub>H<sub>17</sub>N<sub>3</sub>O [M + H]<sup>+</sup>: 268.1444, found: 268.1465.

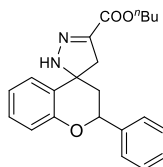

**Butyl 2-phenyl-2',4'-dihydrospiro[chromane-4,3'-pyrazole]-5'-carboxylate (87d):** Prepared according to the general procedure A, the title compound was prepared from *N*-tosylhydrazone (**88b**) (78.4 mg, 0.2 mmol, 1.0 equiv) and butyl acrylate (**1c**) (44.0  $\mu$ l, 0.3 mmol, 1.5 equiv). Spiropyrazoline **87d** was obtained after column chromatography (hexane: EtOAc, 3:1) as a yellow oil (51.0 mg, 0.14 mmol, 70%, dr = 1:1).

**<sup>1</sup>H NMR (500 MHz, CD<sub>3</sub>OD)**  $\delta$  7.54–7.29 (m, 6H), 7.20 (m, 1H), 7.04–6.79 (m, 2H), 5.19 (t,  $J$  = 9.8 Hz, 1H), 4.22 (q,  $J$  = 6.8 Hz, 2H), 3.45–3.31 (m, 1H), 3.13 (dd,  $J$  = 56.1, 17.7 Hz, 1H), 2.37–2.09 (m, 2H), 1.69 (m, 2H), 1.44 (qd,  $J$  = 7.5, 1.9 Hz, 2H), 0.96 (td,  $J$  = 7.4, 1.7 Hz, 3H).

**<sup>13</sup>C NMR (126 MHz, CD<sub>3</sub>OD)**  $\delta$  164.6, 164.4, 155.5, 155.5, 142.2, 142.1, 139.8, 137.9, 130.6, 130.2, 129.6, 129.6, 129.2, 129.1, 128.2, 128.1, 127.6, 127.2, 127.1, 122.7, 122.3, 118.4, 118.0, 77.0, 76.3, 67.6, 65.8, 65.8, 65.6, 45.6, 45.6, 42.6, 31.9, 20.2, 14.1.

**HRMS (ESI<sup>+</sup>),  $m/z$ :** calculated for C<sub>22</sub>H<sub>24</sub>N<sub>2</sub>O<sub>3</sub> [M + H]<sup>+</sup>: 365.1860, found: 365.1889.

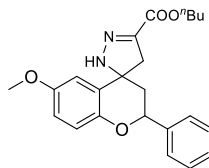

**Butyl 6-methoxy-2-phenyl-2',4'-dihydrospiro[chromane-4,3'-pyrazole]-5'-carboxylate (88d):**

Prepared according to the general procedure A, the title compound was prepared from *N*-tosylhydrazone (**89b**) (78.4mg, 0.2 mmol, 1.0 equiv) and butyl acrylate (**1c**) (44.0  $\mu$ l, 0.3 mmol, 1.5 equiv). Spiropyrazoline **88d** was obtained after column chromatography (hexane: EtOAc, 3:1) as a yellow oil (56.8 mg, 0.144 mmol, 72%, dr = 1:1).

**<sup>1</sup>H NMR (500 MHz, CD<sub>3</sub>OD)**  $\delta$  7.53 – 7.21 (m, 5H), 6.95 – 6.71 (m, 3H), 5.18 – 5.06 (m, 1H), 4.22 (q,  $J$  = 6.7 Hz, 2H), 3.71 (s, 3H), 3.38–3.28 (m, 1H), 3.19–3.05 (m, 1H), 2.48 – 1.97 (m, 2H), 1.74 – 1.63 (m, 2H), 1.48 – 1.38 (m, 2H), 0.96 (t,  $J$  = 7.4 Hz, 3H).

**<sup>13</sup>C NMR (126 MHz, CD<sub>3</sub>OD)**  $\delta$  164.6, 164.4, 155.7, 155.5, 149.7, 149.6, 142.3, 142.2, 139.8, 138.1, 131.2, 129.6, 129.6, 129.1, 129.0, 127.9, 127.3, 127.2, 127.1, 119.2, 118.8, 117.3, 116.9, 112.1, 112.0, 76.9, 76.3, 67.9, 65.9, 65.8, 56.2, 56.2, 45.8, 45.7, 42.6, 31.9, 20.2, 14.1.

**HRMS (ESI<sup>+</sup>),  $m/z$ :** calculated for C<sub>22</sub>H<sub>26</sub>N<sub>2</sub>O<sub>4</sub> [M + H]<sup>+</sup>: 395.1965, found: 395.1955.

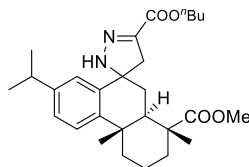

**5'-butyl 1-methyl (1R,4aS,10aR)-7-isopropyl-1,4a-dimethyl-2,2',3,4,4a,4',10,10a-octahydro-1H-spiro[phenanthrene-9,3'-pyrazole]-1,5'-dicarboxylate (89d):** Prepared according to the general procedure A, the title compound was prepared from *N*-tosylhydrazone (**90b**) (99.2mg, 0.2 mmol, 1.0 equiv) and butyl acrylate (**1c**) (44.0  $\mu$ l, 0.3 mmol, 1.5 equiv). Spiropyrazoline **89d** was obtained after column chromatography (hexane: EtOAc, 3:1) as a colourless oil (30.9 mg, 0.066 mmol, 33%, dr > 20:1).

**<sup>1</sup>H NMR (500 MHz, CD<sub>3</sub>OD)**  $\delta$  7.28–7.15 (m, 2H), 7.14–7.06 (m, 1H), 4.25–4.19 (m, 2H), 3.67 (s, 3H), 3.32 (d,  $J$  = 1.2 Hz, 1H), 2.85–2.79 (m, 2H), 2.32 (dd,  $J$  = 41.7, 12.8 Hz, 2H), 2.01–1.79 (m, 4H), 1.70–1.66 (m, 3H), 1.51–1.42 (m, 4H), 1.27 (s, 6H), 1.20–1.17 (m, 6H), 0.97 (dd,  $J$  = 7.3, 1.4 Hz, 3H).

**<sup>13</sup>C NMR (126 MHz, CD<sub>3</sub>OD)**  $\delta$  179.9, 164.9, 148.1, 147.7, 140.1, 136.9, 127.1, 126.4, 125.5, 121.4, 72.3, 65.6, 52.6, 43.8, 39.2, 38.8, 37.6, 35.1, 34.5, 32.0, 25.7, 24.5, 24.4, 20.2, 19.5, 17.0, 14.1.

**HRMS (ESI<sup>+</sup>),  $m/z$ :** calculated for C<sub>28</sub>H<sub>40</sub>N<sub>2</sub>O<sub>4</sub> [M + H]<sup>+</sup>: 469.3061, found: 469.3060.

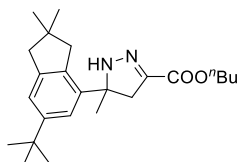

**Butyl 5-(6-(tert-butyl)-2,2-dimethyl-2,3-dihydro-1H-inden-4-yl)-5-methyl-4,5-dihydro-1H-pyrazole-3-carboxylate (90d):** Prepared according to the general procedure A, the title compound was prepared from *N*-tosylhydrazone (**91b**) (82.4 mg, 0.2 mmol, 1.0 equiv) and butyl acrylate (**1c**) (44.0  $\mu$ l, 0.3 mmol, 1.5 equiv). Pyrazoline **90d** was obtained after column chromatography (hexane: EtOAc, 3:1) as a colourless oil (42.3 mg, 0.11 mmol, 55%).

**$^1\text{H}$  NMR (500 MHz,  $\text{CD}_3\text{OD}$ )**  $\delta$  7.27 (d,  $J$  = 1.7 Hz, 1H), 7.12–7.05 (m, 1H), 4.21 (t,  $J$  = 6.7 Hz, 2H), 3.15 (d,  $J$  = 16.8 Hz, 1H), 2.97 (d,  $J$  = 16.7 Hz, 1H), 2.92–2.80 (m, 2H), 1.90 (t,  $J$  = 7.1 Hz, 3H), 1.72–1.66 (m, 2H), 1.50 (s, 3H), 1.46–1.40 (m, 2H), 1.32 (s, 9H), 1.23 (d,  $J$  = 2.2 Hz, 6H), 0.96 (t,  $J$  = 7.4 Hz, 3H).

**$^{13}\text{C}$  NMR (126 MHz,  $\text{CD}_3\text{OD}$ )**  $\delta$  163.0, 153.1, 149.2, 140.4, 137.9, 135.4, 119.7, 116.8, 69.7, 63.8, 43.3, 42.5, 40.8, 33.8, 30.2, 30.0, 28.8, 27.1, 25.4, 18.3, 12.2.

**HRMS (ESI+),  $m/z$ :** calculated for  $\text{C}_{24}\text{H}_{26}\text{N}_2\text{O}_2$   $[\text{M} + \text{H}]^+$ : 385.2850, found: 385.2810.

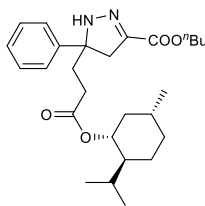

**Butyl 5-(3-(((1R,2S,5R)-2-isopropyl-5-methylcyclohexyl)oxy)-3-oxopropyl)-5-phenyl-4,5-dihydro-1H-pyrazole-3-carboxylate (91d):** Prepared according to the general procedure A, the title compound was prepared from *N*-tosylhydrazone (**92b**) (96.8 mg, 0.2 mmol, 1.0 equiv) and butyl acrylate (**1c**) (44.0  $\mu$ l, 0.3 mmol, 1.5 equiv). Pyrazoline **91d** was obtained after column chromatography (hexane: EtOAc, 3:1) as a colourless oil (75.8 mg, 0.166 mmol, 83%, dr > 20:1).

**<sup>1</sup>H NMR (500 MHz, CD<sub>3</sub>OD)**  $\delta$  7.43–7.32 (m, 4H), 7.31–7.21 (m, 1H), 4.63 (tdd,  $J$  = 10.9, 3.4, 1.2 Hz, 1H), 4.18 (t,  $J$  = 6.6 Hz, 2H), 3.20 (dd,  $J$  = 17.2, 1.3 Hz, 1H), 3.02 (d,  $J$  = 17.2 Hz, 1H), 2.33–2.07 (m, 4H), 1.92–1.76 (m, 2H), 1.66 (dq,  $J$  = 9.3, 6.4 Hz, 4H), 1.47–1.32 (m, 4H), 1.06 (qd,  $J$  = 13.4, 12.8, 3.7 Hz, 1H), 0.97–0.87 (m, 11H), 0.72 (dd,  $J$  = 6.9, 3.6 Hz, 3H).

**<sup>13</sup>C NMR (126 MHz, CD<sub>3</sub>OD)**  $\delta$  174.4, 174.4, 164.5, 145.8, 145.8, 139.8, 139.8, 129.8, 128.3, 126.5, 75.6, 75.6, 74.0, 74.0, 65.7, 44.8, 44.6, 42.0, 37.2, 37.2, 35.4, 32.7, 31.9, 30.8, 27.5, 27.5, 24.6, 22.5, 21.1, 20.2, 16.8, 14.1.

**HRMS (ESI<sup>+</sup>),  $m/z$ :** calculated for C<sub>27</sub>H<sub>40</sub>N<sub>2</sub>O<sub>4</sub> [ $M + H$ ]<sup>+</sup>: 457.3061, found: 457.3086.

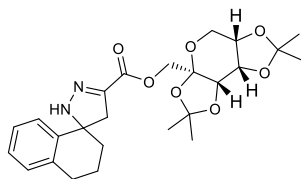

**(2,2,7,7-tetramethyltetrahydro-3aH-bis([1,3]dioxolo)[4,5-b:4',5'-d]pyran-3a-yl)methyl 2',3,4,4'-tetrahydro-2H-spiro[naphthalene-1,3'-pyrazole]-5'-carboxylate (92d):** Prepared according to the general procedure A, the title compound was prepared from *N*-tosylhydrazone (**1b**) (62.8 mg, 0.2 mmol, 1.0 equiv) and butyl acrylate (**93c**) (94.0  $\mu$ l, 0.3 mmol, 1.5 equiv). Spiropyrazoline **92d** was obtained after column chromatography (hexane: EtOAc, 3:1) as a colourless oil (58.6 mg, 0.124 mmol, 62%, dr =3:1).

**$^1\text{H}$  NMR (500 MHz,  $\text{CD}_3\text{OD}$ )**  $\delta$  7.88 (d,  $J$  = 8.4 Hz, 1H), 7.37–7.21 (m, 1H), 7.16–7.11 (m, 2H), 4.65 (dd,  $J$  = 7.9, 2.7 Hz, 1H), 4.57 (dd,  $J$  = 11.7, 4.3 Hz, 1H), 4.46–4.34 (m, 1H), 4.27–4.04 (m, 1H), 3.96–3.89 (m, 1H), 3.73–3.50 (m, 2H), 3.14 (dd,  $J$  = 17.3, 1.2 Hz, 1H), 3.03 (dd,  $J$  = 17.2, 3.8 Hz, 1H), 2.80–2.53 (m, 2H), 1.99–1.78 (m, 4H), 1.50 (d,  $J$  = 4.2 Hz, 3H), 1.43 (d,  $J$  = 4.7 Hz, 3H), 1.42–1.36 (m, 3H), 1.33 (d,  $J$  = 3.5 Hz, 3H).

**$^{13}\text{C}$  NMR (126 MHz,  $\text{CD}_3\text{OD}$ )**  $\delta$  173.0, 164.1, 164.0, 154.6, 145.2, 141.8, 141.3, 137.7, 137.7, 137.6, 136.2, 136.1, 133.1, 130.5, 130.5, 130.0, 130.0, 129.5, 129.2, 128.4, 127.9, 127.9, 127.6, 127.6, 127.3, 125.8, 110.2, 110.2, 110.1, 109.7, 104.6, 102.9, 102.9, 72.5, 72.3, 71.7, 71.6, 71.4, 71.3, 70.1, 65.4, 64.8, 62.4, 62.2, 61.6, 47.9, 47.9, 37.0, 37.0, 30.4, 30.2, 30.2, 27.1, 26.9, 26.8, 26.8, 26.3, 26.2, 25.9, 25.9, 24.3, 24.3, 22.9, 21.6, 21.0, 20.9, 14.5.

**HRMS (ESI+),  $m/z$ :** calculated for  $\text{C}_{25}\text{H}_{32}\text{N}_2\text{O}_7$   $[\text{M} + \text{H}]^+$ : 473.2282, found: 473.2312.

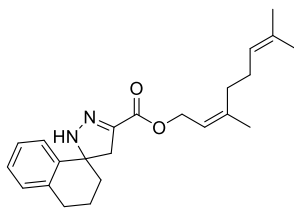

**(Z)-3,7-dimethylocta-2,6-dien-1-yl 2',3,4,4'-tetrahydro-2H-spiro[naphthalene-1,3'-pyrazole]-5'-carboxylate (93d):** Prepared according to the general procedure A, the title compound was prepared from *N*-tosylhydrazone (**1b**) (62.8 mg, 0.2 mmol, 1.0 equiv) and butyl acrylate (**94c**) (65.0  $\mu$ l, 0.3 mmol, 1.5 equiv). Spiropyrazoline **93d** was obtained after column chromatography (hexane: EtOAc, 3:1) as a colourless oil (57.1 mg, 0.156 mmol, 78%).

**<sup>1</sup>H NMR (500 MHz, CD<sub>3</sub>OD)**  $\delta$  7.36–7.26 (m, 1H), 7.19–7.01 (m, 3H), 5.42 (td,  $J$  = 7.3, 1.6 Hz, 1H), 5.12 (ddt,  $J$  = 6.9, 5.4, 1.5 Hz, 1H), 4.69 (dd,  $J$  = 7.3, 1.1 Hz, 2H), 3.10 (d,  $J$  = 17.5 Hz, 1H), 2.99 (d,  $J$  = 17.4 Hz, 1H), 2.79 (p,  $J$  = 4.0, 3.3 Hz, 2H), 2.23–2.08 (m, 4H), 2.02–1.81 (m, 4H), 1.77 (d,  $J$  = 1.3 Hz, 3H), 1.63 (dd,  $J$  = 30.3, 1.3 Hz, 6H).

**<sup>13</sup>C NMR (126 MHz, CD<sub>3</sub>OD)**  $\delta$  164.7, 143.9, 141.9, 137.6, 137.2, 133.0, 130.0, 128.4, 127.9, 127.6, 124.9, 120.5, 70.0, 62.3, 48.0, 37.0, 33.1, 30.3, 27.7, 26.0, 23.8, 21.0, 17.9.

**HRMS (ESI<sup>+</sup>),  $m/z$ :** calculated for C<sub>23</sub>H<sub>30</sub>N<sub>2</sub>O<sub>2</sub> [M + H]<sup>+</sup>: 367.2380, found: 367.2373.

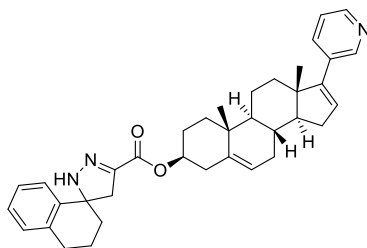

**(3S,8R,9S,10R,13S,14S)-10,13-dimethyl-17-(pyridin-3-yl)-2,3,4,7,8,9,10,11,12,13,14,15-dodecahydro-1H-cyclopenta[a]phenanthren-3-yl 2',3,4,4'-tetrahydro-2H-spiro[naphthalene-1,3'-pyrazole]-5'-carboxylate (94d):** Prepared according to the general procedure A, the title compound was prepared from *N*-tosylhydrazone (**1b**) (62.8 mg, 0.2 mmol, 1.0 equiv) and butyl acrylate (**95c**) (120.9 mg, 0.3 mmol, 1.5 equiv). Spiropyrazoline **94d** was obtained after column chromatography (hexane: EtOAc, 3:1) as a white solid (50.5 mg, 0.09 mmol, 45%, dr > 20:1).

**<sup>1</sup>H NMR (500 MHz, CD<sub>3</sub>OD)** δ 8.53 (s, 1H), 8.38 (s, 1H), 7.84 (dd, *J* = 7.9, 2.0 Hz, 1H), 7.46–7.28 (m, 2H), 7.22–7.01 (m, 3H), 6.09 (q, *J* = 1.8 Hz, 1H), 5.46 (s, 1H), 4.76–4.64 (m, 1H), 3.12 (dd, *J* = 17.5, 2.0 Hz, 1H), 3.01 (d, *J* = 17.4 Hz, 1H), 2.80 (d, *J* = 4.5 Hz, 2H), 2.42 (t, *J* = 6.6 Hz, 2H), 2.15–1.64 (m, 16H), 1.62 – 1.46 (m, 2H), 1.11 (dd, *J* = 20.5, 2.6 Hz, 7H).

**<sup>13</sup>C NMR (126 MHz, CD<sub>3</sub>OD)** δ 164.2, 152.7, 148.1, 148.0, 142.0, 141.4, 137.7, 137.4, 136.0, 135.0, 131.0, 130.0, 128.4, 127.9, 127.6, 125.0, 123.5, 75.8, 70.0, 59.0, 51.9, 47.9, 39.3, 38.2, 38.0, 37.0, 36.5, 32.8, 32.7, 31.8, 30.3, 28.9, 22.0, 21.0, 19.8, 17.0.

**HRMS (ESI<sup>+</sup>), *m/z*:** calculated for C<sub>37</sub>H<sub>43</sub>N<sub>3</sub>O<sub>2</sub> [*M* + H]<sup>+</sup>: 562.3428, found: 562.3416.



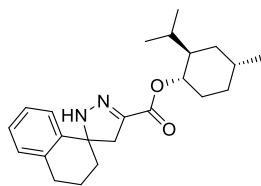

**(1S,2R,4R)-2-isopropyl-4-methylcyclohexyl 2',3,4,4'-tetrahydro-2H-spiro[naphthalene-1,3'-pyrazole]-5'-carboxylate (95d):** Prepared according to the general procedure A, the title compound was prepared from *N*-tosylhydrazone (**1b**) (62.8 mg, 0.2 mmol, 1.0 equiv) and butyl acrylate (**96c**) (65.0  $\mu$ l, 0.3 mmol, 1.5 equiv). Spiropyrazoline **95d** was obtained after column chromatography (hexane: EtOAc, 3:1) as a white solid (61.1 mg, 0.166 mmol, 83%, dr = 2:1).

**<sup>1</sup>H NMR (500 MHz, CD<sub>3</sub>OD)**  $\delta$  7.36–7.25 (m, 1H), 7.22–7.02 (m, 3H), 4.84–4.78 (m, 1H), 3.10 (dd,  $J$  = 17.4, 12.0 Hz, 1H), 3.00 (dd,  $J$  = 17.4, 9.3 Hz, 1H), 2.80 (q,  $J$  = 5.3, 4.7 Hz, 2H), 2.04–1.83 (m, 6H), 1.72 (dt,  $J$  = 12.7, 2.9 Hz, 2H), 1.53–1.45 (m, 2H), 1.16–1.05 (m, 2H), 0.95–0.89 (m, 7H), 0.80 (dd,  $J$  = 9.8, 6.9 Hz, 3H).

**<sup>13</sup>C NMR (126 MHz, CD<sub>3</sub>OD)**  $\delta$  162.6, 162.6, 140.0, 135.8, 135.5, 128.1, 126.5, 126.0, 125.8, 74.0, 68.1, 46.1, 40.3, 35.1, 33.5, 30.9, 28.4, 25.8, 22.9, 20.6, 19.2, 19.1, 15.1.

**HRMS (ESI<sup>+</sup>),  $m/z$ :** calculated for C<sub>23</sub>H<sub>32</sub>N<sub>2</sub>O<sub>2</sub> [M + Na]<sup>+</sup>: 391.2356, found: 391.2380.

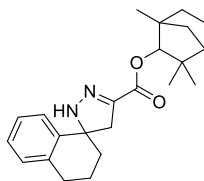

**1,3,3-trimethylbicyclo[2.2.1]heptan-2-yl 2',3,4,4'-tetrahydro-2H-spiro[naphthalene-1,3'-pyrazole]-5'-carboxylate (96d):** Prepared according to the general procedure A, the title compound was prepared from *N*-tosylhydrazone (**1b**) (62.8 mg, 0.2 mmol, 1.0 equiv) and butyl acrylate (**97c**) (65.0  $\mu$ l, 0.3 mmol, 1.5 equiv). Spiropyrazoline **96d** was obtained after column chromatography (hexane: EtOAc, 3:1) as a white solid (60.8 mg, 0.166 mmol, 83%, dr = 1:1).

**<sup>1</sup>H NMR (500 MHz, CD<sub>3</sub>OD)**  $\delta$  7.32 (dt,  $J$  = 6.9, 1.8 Hz, 1H), 7.21–7.00 (m, 3H), 4.48 (dd,  $J$  = 4.1, 1.9 Hz, 1H), 3.14 (dd,  $J$  = 17.4, 2.2 Hz, 1H), 3.04 (dd,  $J$  = 17.4, 2.9 Hz, 1H), 2.81 (d,  $J$  = 5.2 Hz, 2H), 2.10–1.59 (m, 8H), 1.49 (dddd,  $J$  = 16.8, 9.7, 7.6, 4.4 Hz, 1H), 1.42–1.17 (m, 2H), 1.15–1.05 (m, 6H), 0.82 (d,  $J$  = 18.1 Hz, 3H).

**<sup>13</sup>C NMR (126 MHz, CD<sub>3</sub>OD)**  $\delta$  165.3, 142.0, 137.6, 137.2, 123.0, 128.4, 127.8, 127.7, 87.9, 70.0, 49.8, 48.1, 42.3, 40.8, 37.1, 37.0, 30.3, 30.2, 27.6, 26.8, 21.0, 20.7, 19.8.

**HRMS (ESI<sup>+</sup>),  $m/z$ :** calculated for C<sub>23</sub>H<sub>30</sub>N<sub>2</sub>O<sub>2</sub> [M + H]<sup>+</sup>: 367.2380, found: 367.2368.

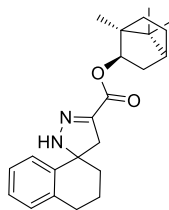

**(1S,2R,4R)-1,7,7-trimethylbicyclo[2.2.1]heptan-2-yl 2',3,4,4'-tetrahydro-2H-spiro[naphthalene-1,3'-pyrazole]-5'-carboxylate (97d):** Prepared according to the general procedure A, the title compound was prepared from *N*-tosylhydrazone (**1b**) (62.8 mg, 0.2 mmol, 1.0 equiv) and butyl acrylate (**98c**) (65.0  $\mu$ L, 0.3 mmol, 1.5 equiv). Spiropyrazoline **97d** was obtained after column chromatography (hexane: EtOAc, 3:1) as a white solid (49.1 mg, 0.134 mmol, 67%, dr = 2:1).

**<sup>1</sup>H NMR (500 MHz, CD<sub>3</sub>OD)**  $\delta$  7.31 (dt,  $J$  = 6.9, 1.7 Hz, 1H), 7.23–7.01 (m, 3H), 4.84–4.75 (m, 1H), 3.09 (d,  $J$  = 17.4 Hz, 1H), 2.98 (d,  $J$  = 17.4 Hz, 1H), 2.80 (s, 2H), 2.05–1.79 (m, 6H), 1.79–1.71 (m, 2H), 1.69–1.54 (m, 1H), 1.24–1.08 (m, 2H), 1.02 (d,  $J$  = 3.5 Hz, 3H), 0.93–0.84 (m, 6H).

**<sup>13</sup>C NMR (126 MHz, CD<sub>3</sub>OD)**  $\delta$  164.4, 142.0, 137.6, 137.4, 130.0, 128.4, 127.8, 127.6, 82.6, 70.0, 50.0, 48.1, 48.0, 46.5, 39.8, 37.0, 34.7, 30.3, 28.0, 21.0, 20.6, 20.5, 11.9.

**HRMS (ESI<sup>+</sup>),  $m/z$ :** calculated for C<sub>23</sub>H<sub>30</sub>N<sub>2</sub>O<sub>2</sub> [M + H]<sup>+</sup>: 367.2380, found: 367.2390.

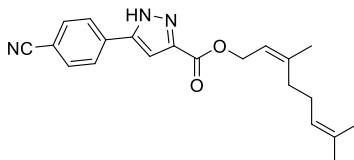

**(Z)-3,7-dimethylocta-2,6-dien-1-yl 5-(4-cyanophenyl)-1H-pyrazole-3-carboxylate (98d):** Prepared according to the general procedure B, the title compound was prepared from *N*-tosylhydrazone (**79b**) (60.0 mg, 0.2 mmol, 1.0 equiv) and butyl acrylate (**94c**) (65.0  $\mu$ L, 0.3 mmol, 1.5 equiv). Pyrazole **98d** was obtained after column chromatography (hexane: EtOAc, 3:1) as a colourless oil (46.8 mg, 0.134 mmol, 67%).

**<sup>1</sup>H NMR (500 MHz, CDCl<sub>3</sub>)**  $\delta$  7.94 (d,  $J$  = 8.5 Hz, 2H), 7.72 (d,  $J$  = 8.4 Hz, 2H), 7.19 (s, 1H), 5.53–5.42 (m, 1H), 5.19–5.06 (m, 1H), 4.86 (dd,  $J$  = 7.4, 1.0 Hz, 2H), 2.24–2.09 (m, 4H), 1.81 (d,  $J$  = 1.3 Hz, 3H), 1.68 (d,  $J$  = 1.5 Hz, 4H), 1.61 (d,  $J$  = 1.3 Hz, 3H).

**<sup>13</sup>C NMR (126 MHz, CDCl<sub>3</sub>)**  $\delta$  160.8, 151.9, 145.5, 137.9, 134.1, 133.9, 130.7, 127.6, 124.8, 120.2, 119.7, 113.2, 107.9, 63.7, 33.7, 28.1, 27.1, 25.0, 19.1.

**HRMS (ESI<sup>+</sup>),  $m/z$ :** calculated for C<sub>21</sub>H<sub>23</sub>N<sub>3</sub>O<sub>2</sub> [M + H]<sup>+</sup>: 350.1863, found: 350.1901.

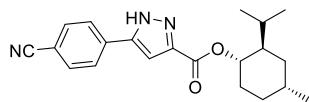

**(1S,2R,4R)-2-isopropyl-4-methylcyclohexyl 5-(4-cyanophenyl)-1H-pyrazole-3-carboxylate (99d):**

Prepared according to the general procedure B, the title compound was prepared from *N*-tosylhydrazone (**79b**) (60.0 mg, 0.2 mmol, 1.0 equiv) and butyl acrylate (**96c**) (65.0  $\mu$ l, 0.3 mmol, 1.5 equiv). Pyrazole **99d** was obtained after column chromatography (hexane: EtOAc, 3:1) as a colourless oil (49.2 mg, 0.14 mmol, 70%).

**<sup>1</sup>H NMR (500 MHz, CDCl<sub>3</sub>)**  $\delta$  7.97 (d, *J* = 8.4 Hz, 2H), 7.73 (d, *J* = 8.5 Hz, 2H), 7.19 (s, 1H), 4.99 (td, *J* = 10.9, 4.5 Hz, 1H), 2.19–2.10 (m, 1H), 1.92 (dd, *J* = 7.0, 2.8 Hz, 1H), 1.80–1.69 (m, 2H), 1.66–1.48 (m, 2H), 1.21–1.08 (m, 2H), 0.94 (dd, *J* = 11.0, 6.8 Hz, 6H), 0.81 (d, *J* = 6.9 Hz, 3H).

**<sup>13</sup>C NMR (126 MHz, CDCl<sub>3</sub>)**  $\delta$  160.5, 137.9, 134.1, 133.8, 130.7, 127.6, 120.2, 113.1, 107.8, 77.5, 48.6, 42.3, 35.6, 32.9, 28.0, 25.0, 23.4, 22.1, 17.9.

**HRMS (ESI<sup>+</sup>), *m/z*:** calculated for C<sub>21</sub>H<sub>25</sub>N<sub>3</sub>O<sub>2</sub> [M + H]<sup>+</sup>: 352.2020, found: 352.2043.

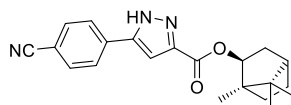

**(1R,2S,4S)-1,7,7-trimethylbicyclo[2.2.1]heptan-2-yl 5-(4-cyanophenyl)-1H-pyrazole-3-carboxylate**

**(100d):** Prepared according to the general procedure B, the title compound was prepared from *N*-tosylhydrazone (**79b**) (60.0 mg, 0.2 mmol, 1.0 equiv) and butyl acrylate (**98c**) (65.0  $\mu$ l, 0.3 mmol, 1.5 equiv). Pyrazole **100d** was obtained after column chromatography (hexane: EtO Ac, 3:1) as a colourless oil (31.4 mg, 0.09 mmol, 45%).

**<sup>1</sup>H NMR (500 MHz, CDCl<sub>3</sub>)**  $\delta$  7.98 (d, *J* = 8.5 Hz, 2H), 7.73 (d, *J* = 8.5 Hz, 2H), 7.11 (s, 1H), 4.97 (t, *J* = 5.8 Hz, 1H), 1.99–1.91 (m, 2H), 1.85 (dd, *J* = 4.3, 2.3 Hz, 1H), 1.81–1.63 (m, 2H), 1.12 (s, 5H), 0.93 (d, *J* = 24.6 Hz, 6H).

**<sup>13</sup>C NMR (126 MHz, CDCl<sub>3</sub>)**  $\delta$  160.4, 138.0, 134.1, 133.8, 130.7, 127.6, 120.2, 113.2, 107.5, 84.2, 50.6, 48.5, 46.5, 40.1, 35.0, 28.4, 21.5, 21.5, 13.0.

**HRMS (ESI<sup>+</sup>), *m/z*:** calculated for C<sub>21</sub>H<sub>23</sub>N<sub>3</sub>O<sub>2</sub> [M + H]<sup>+</sup>: 350.1863, found: 350.1901.

## 5. Procedures of synthesizing starting material and characterization data

### Synthesis of *N*-tosylhydrazones

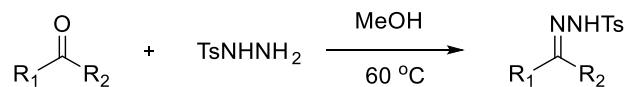

*N*-tosylhydrazones were prepared according a reported procedure.<sup>[2]</sup> To a stirred solution of tosylhydrazide (10.0 mmol) in MeOH (10.0 mL) at 60 °C, ketone (1.0 equiv) was added dropwise (or portionwise if solid). The reaction was completed within 0.5-3 h. After that, the solvent was removed directly under reduced pressure, and the crude mixture was further purified by recrystallization or silica gel chromatography.

### Synthesis of alkenes

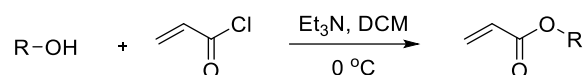

To a stirred suspension of alcohol (6.5 mmol, 1.0 equiv) in dry CH<sub>2</sub>Cl<sub>2</sub> (25.0 mL) was added Et<sub>3</sub>N (9.8 mmol, 1.5 equiv). Acryloyl chloride (7.8 mmol, 1.2 equiv) was added dropwise to the mixture at 0 °C and the mixture was stirred for 12 h at room temperature (the progress can be monitored *via* TLC). After the reaction, the resulting reaction mixture was poured into water and subsequently extracted with dichloromethane for three times. The combined organic layers were dried over anhydrous Na<sub>2</sub>SO<sub>4</sub>, filtered and concentrated *in vacuo*. Afterwards, products were obtained *via* silica gel chromatography<sup>[3-5]</sup>(hexane: EtOAc, 30:1).

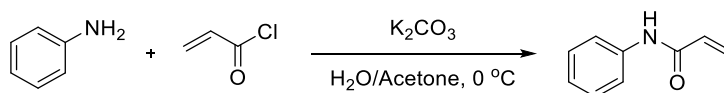

To a stirred suspension of potassium carbonate (2.8 g, 20.0 mmol, 2.0 equiv) in distilled water (5.0 mL) and acetone (20.0 mL) was added acryloyl chloride (1.8 g, 20.0 mmol, 2.0 equiv) at 0 °C under the atmosphere of argon. Aniline (0.9 mL, 10.0 mmol, 1.0 equiv) was then added dropwise to the mixture and stirred for 1 h at 0 °C. After filtration, the mixture was concentrated under reduced pressure and extracted three times with dichloromethane<sup>[3]</sup>. The combined organic layers were dried over anhydrous Na<sub>2</sub>SO<sub>4</sub>, filtered and concentrated *in vacuo*. The residue was purified by flash chromatography with EtOAc/n-Hexane to give the corresponding product as a white solid in 98% yield.

### Synthesis of *N*-tosylhydrazone sodium salt

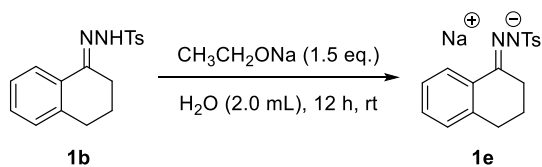

To a stirred suspension of *N*-tosylhydrazone (1.0 mmol, 1.0 equiv) in H<sub>2</sub>O (2.0 mL) was added CH<sub>3</sub>CH<sub>2</sub>ONa (1.5 mmol, 1.5 equiv). The mixture was stirred for 12 h at room temperature. After the reaction, yield hydrazone salt in quantitative yield. Solid hydrazone salt was then ground using a pestle and mortar to give a free flowing powder<sup>[6-7]</sup>.

### Synthesis of ammonium salts of DBU

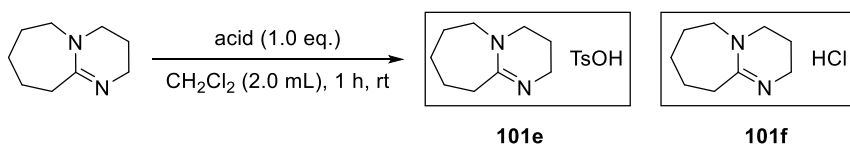

To a stirred suspension of DBU (2.0 mmol, 1.0 equiv) in CH<sub>2</sub>Cl<sub>2</sub> (2.0 mL) was added TsOH or HCl (2.0 mmol, 1.0 equiv). The mixture was stirred for 2 h at room temperature. After the reaction, yield DBU salt in quantitative yield.

### Characterization data for the *N*-tosylhydrazones

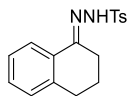

***N'*-(3,4-Dihydronaphthalen-1(2*H*)-ylidene)-4-methylbenzenesulfonohydrazide (1b)** : Prepared according to the synthesis of *N*-tosylhydrazones, the title compound was prepared from tosylhydrazide (10.0 mmol) in MeOH (10.0 mL) , ketone (1.0 equiv), *N*-tosylhydrazones **1b** was obtained as a white solid by recrystallization (isolated yield: 90%).

**<sup>1</sup>H NMR (500 MHz, CDCl<sub>3</sub>)** δ 7.98 (d, *J* = 6.6 Hz, 1H), 7.93 (d, *J* = 8.3 Hz, 2H), 7.76 (s, 1H), 7.32 (d, *J* = 8.0 Hz, 2H), 7.26 – 7.17 (m, 2H), 7.09 (d, *J* = 8.0 Hz, 1H), 2.77 – 2.69 (m, 2H), 2.47 (t, *J* = 6.6 Hz, 2H), 2.41 (s, 3H), 1.89 (m, 2H).

**<sup>13</sup>C NMR (126 MHz, CDCl<sub>3</sub>)** δ 143.7, 139.3, 135.0, 131.0, 129.1, 129.1, 127.9, 127.7, 126.0, 124.6, 28.8, 24.9, 21.2, 20.9.

**HRMS (ESI<sup>+</sup>), *m/z***: calculated for C<sub>17</sub>H<sub>18</sub>N<sub>2</sub>O<sub>2</sub>S [M + H]<sup>+</sup>: 315.1163, found: 315.1188.

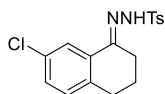

***N'*-(7-Chloro-3,4-dihydronaphthalen-1(2*H*)-ylidene)-4-methylbenzenesulfonohydrazide (2b)**:

Prepared according to the synthesis of *N*-tosylhydrazones, the title compound was prepared from tosylhydrazide (10.0 mmol) in MeOH (10.0 mL) , ketone (1.0 equiv), *N*-tosylhydrazones **2b** was obtained as a white solid by recrystallization (isolated yield: 76%).

**<sup>1</sup>H NMR (500 MHz, DMSO-*d*<sub>6</sub>)** δ 10.58 (s, 1H), 7.79 (d, *J* = 8.3 Hz, 2H), 7.65 (d, *J* = 2.3 Hz, 1H), 7.41 (d, *J* = 8.1 Hz, 2H), 7.29 (dd, *J* = 8.2, 2.3 Hz, 1H), 7.19 (d, *J* = 8.2 Hz, 1H), 2.66 (t, *J* = 6.0 Hz, 2H), 2.57 – 2.45 (m, 5H), 1.80 – 1.64 (m, 2H).

**HRMS (ESI<sup>+</sup>), *m/z***: calculated for C<sub>17</sub>H<sub>17</sub>ClN<sub>2</sub>O<sub>2</sub>S [M + H]<sup>+</sup>: 349.0772, found: 349.0802.

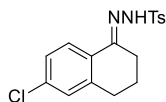

***N'*-(6-Chloro-3,4-dihydronaphthalen-1(2*H*)-ylidene)-4-methylbenzenesulfonohydrazide (3b):**

Prepared according to the synthesis of *N*-tosylhydrazones, the title compound was prepared from tosylhydrazide (10.0 mmol) in MeOH (10.0 mL), ketone (1.0 equiv), *N*-tosylhydrazones **3b** was obtained as a white solid by recrystallization (isolated yield: 85%).

**<sup>1</sup>H NMR (500 MHz, CDCl<sub>3</sub>)** δ 7.94 – 7.87 (m, 3H), 7.80 (s, 1H), 7.33 (d, *J* = 8.0 Hz, 2H), 7.15 (dd, *J* = 8.5, 2.2 Hz, 1H), 7.08 (d, *J* = 2.0 Hz, 1H), 2.70 – 2.65 (m, 2H), 2.45 (t, *J* = 6.6 Hz, 2H), 2.42 (s, 3H), 1.87 (m, 2H).

**<sup>13</sup>C NMR (126 MHz, CDCl<sub>3</sub>)** δ 150.9, 143.8, 140.7, 134.9, 129.7, 129.5, 129.2, 127.8, 127.7, 126.4, 126.1, 28.6, 24.7, 21.2, 20.7.

**HRMS (ESI<sup>+</sup>), *m/z*:** calculated for C<sub>17</sub>H<sub>17</sub>ClN<sub>2</sub>O<sub>2</sub>S [M + H]<sup>+</sup>: 349.0772, found: 349.0768.

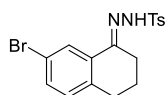

***N'*-(7-Bromo-3,4-dihydronaphthalen-1(2*H*)-ylidene)-4-methylbenzenesulfonohydrazide (4b):**

Prepared according to the synthesis of *N*-tosylhydrazones, the title compound was prepared from tosylhydrazide (10.0 mmol) in MeOH (10.0 mL), ketone (1.0 equiv), *N*-tosylhydrazones **4b** was obtained as a white solid by recrystallization (isolated yield: 85%).

**<sup>1</sup>H NMR (500 MHz, DMSO-*d*<sub>6</sub>)** δ 10.59 (s, 1H), 7.87 – 7.73 (m, 3H), 7.49 – 7.36 (m, 3H), 7.13 (d, *J* = 8.2 Hz, 1H), 2.70 – 2.62 (m, 2H), 2.51 (d, *J* = 6.5 Hz, 2H), 2.36 (s, 3H), 1.73 (m, 2H).

**HRMS (ESI<sup>+</sup>), *m/z*:** calculated for C<sub>17</sub>H<sub>17</sub>BrN<sub>2</sub>O<sub>2</sub>S [M + H]<sup>+</sup>: 393.0267, found: 393.0298.



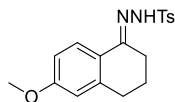

***N'*-(6-Methoxy-3,4-dihydronaphthalen-1(2*H*)-ylidene)-4-methylbenzenesulfonohydrazide (5b):**

Prepared according to the synthesis of *N*-tosylhydrazones, the title compound was prepared from tosylhydrazide (10.0 mmol) in MeOH (10.0 mL), ketone (1.0 equiv), *N*-tosylhydrazones **5b** was obtained as a white solid by recrystallization (isolated yield: 81%).

**<sup>1</sup>H NMR (500 MHz, CDCl<sub>3</sub>)** δ 7.92 (dd, *J* = 8.5, 1.6 Hz, 3H), 7.60 (s, 1H), 7.31 (d, *J* = 8.1 Hz, 2H), 6.75 (dd, *J* = 8.8, 2.7 Hz, 1H), 6.58 (d, *J* = 2.6 Hz, 1H), 3.79 (s, 3H), 2.72 – 2.62 (m, 2H), 2.44 (t, *J* = 6.6 Hz, 2H), 2.41 (s, 3H), 1.93 – 1.79 (m, 2H).

**HRMS (ESI<sup>+</sup>), *m/z*:** calculated for C<sub>18</sub>H<sub>20</sub>N<sub>2</sub>O<sub>3</sub>S [M + H]<sup>+</sup>: 345.1267, found: 345.1288.

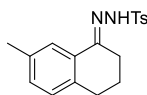

**4-Methyl-*N'*-(7-methyl-3,4-dihydronaphthalen-1(2*H*)-ylidene)benzenesulfonohydrazide (6b):**

Prepared according to the synthesis of *N*-tosylhydrazones, the title compound was prepared from tosylhydrazide (10.0 mmol) in MeOH (10.0 mL), ketone (1.0 equiv), *N*-tosylhydrazones **6b** was obtained as a white solid by recrystallization (isolated yield: 89%).

**<sup>1</sup>H NMR (500 MHz, CDCl<sub>3</sub>)** δ 7.93 (d, *J* = 8.4 Hz, 2H), 7.79 (d, *J* = 1.8 Hz, 1H), 7.57 (s, 1H), 7.32 (d, *J* = 8.0 Hz, 2H), 7.09 – 6.95 (m, 2H), 2.66 (m, 2H), 2.49 – 2.42 (m, 2H), 2.41 (s, 3H), 2.33 (s, 3H), 1.90 – 1.82 (m, 2H).

**HRMS (ESI<sup>+</sup>), *m/z*:** calculated for C<sub>18</sub>H<sub>20</sub>N<sub>2</sub>O<sub>2</sub>S [M + H]<sup>+</sup>: 329.1318, found: 329.1344.

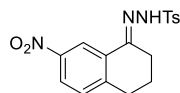

**4-Methyl-*N'*-(7-nitro-3,4-dihydronaphthalen-1(2*H*)-ylidene)benzenesulfonohydrazide (7b):**

Prepared according to the synthesis of *N*-tosylhydrazones, the title compound was prepared from tosylhydrazide (10.0 mmol) in MeOH (10.0 mL), ketone (1.0 equiv), *N*-tosylhydrazones **7b** was obtained as a white solid by recrystallization (isolated yield: 92%).

**<sup>1</sup>H NMR (500 MHz, DMSO-*d*<sub>6</sub>)** δ 10.75 (s, 1H), 8.49 (d, *J* = 2.5 Hz, 1H), 8.06 (dd, *J* = 8.4, 2.5 Hz, 1H), 7.81 (d, *J* = 8.3 Hz, 2H), 7.43 (dd, *J* = 13.9, 8.3 Hz, 3H), 2.81 (t, *J* = 5.9 Hz, 2H), 2.57 (t, *J* = 6.5 Hz, 2H), 2.36 (s, 3H), 1.78 (m, 2H).

**<sup>13</sup>C NMR (126 MHz, DMSO-*d*<sub>6</sub>)** δ 150.7, 147.2, 146.2, 143.6, 136.0, 132.9, 130.4, 129.5, 127.5, 123.2, 118.7, 28.7, 25.5, 21.0, 20.4.

**HRMS (ESI<sup>+</sup>), *m/z*:** calculated for C<sub>17</sub>H<sub>17</sub>N<sub>3</sub>O<sub>4</sub>S [M + H]<sup>+</sup>: 360.1013, found: 321.1043.

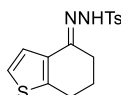

***N'*-(6,7-dihydrobenzo[b]thiophen-4(5*H*)-ylidene)-4-methylbenzenesulfonohydrazide (8b):**

Prepared according to the synthesis of *N*-tosylhydrazones, the title compound was prepared from tosylhydrazide (10.0 mmol) in MeOH (10.0 mL), ketone (1.0 equiv), *N*-tosylhydrazones **8b** was obtained as a white solid by recrystallization (isolated yield: 77%).

**<sup>1</sup>H NMR (500 MHz, CDCl<sub>3</sub>)** δ 7.90 (d, *J* = 8.3 Hz, 2H), 7.51 (s, 1H), 7.32 (dd, *J* = 8.3, 6.7 Hz, 3H), 7.01 (d, *J* = 5.3 Hz, 1H), 2.81 (t, *J* = 6.1 Hz, 2H), 2.43 (s, 2H), 2.41 (s, 3H), 2.05 – 1.93 (m, 2H).

**HRMS (ESI<sup>+</sup>), *m/z*:** calculated for C<sub>15</sub>H<sub>16</sub>N<sub>2</sub>O<sub>2</sub>S<sub>2</sub> [M + H]<sup>+</sup>: 321.0726, found: 321.0776.

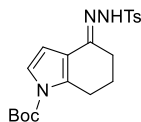

**Tert-butyl-4-(2-tosylhydrazono)-4,5,6,7-tetrahydro-1H-indole-1-carboxylate (9b):** Prepared according to the synthesis of *N*-tosylhydrazones, the title compound was prepared from tosylhydrazide (10.0 mmol) in MeOH (10.0 mL), ketone (1.0 equiv), *N*-tosylhydrazones **9b** was obtained as a white solid by recrystallization (isolated yield: 80%).

**<sup>1</sup>H NMR (500 MHz, CDCl<sub>3</sub>)** δ 7.88 (d, *J* = 8.3 Hz, 2H), 7.29 (d, *J* = 8.1 Hz, 2H), 7.10 (d, *J* = 3.5 Hz, 1H), 6.45 (d, *J* = 3.5 Hz, 1H), 2.95 (t, *J* = 6.2 Hz, 2H), 2.40 (s, 3H), 2.37 (t, *J* = 6.5 Hz, 2H), 1.98 – 1.92 (m, 2H), 1.57 (s, 9H).

**<sup>13</sup>C NMR (126 MHz, CDCl<sub>3</sub>)** δ 148.5, 143.5, 134.9, 129.5, 129.0, 127.8, 127.7, 120.7, 120.6, 106.6, 83.8, 27.5, 23.3, 23.2, 21.7, 21.1.

**HRMS (ESI<sup>+</sup>), *m/z*:** calculated for C<sub>20</sub>H<sub>25</sub>N<sub>3</sub>O<sub>4</sub>S [M + H]<sup>+</sup>: 404.1639, found: 404.1598.

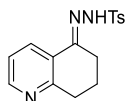

***N'*-(7,8-dihydroquinolin-5(6*H*)-ylidene)-4-methylbenzenesulfonohydrazide (10b):** Prepared according to the synthesis of *N*-tosylhydrazones, the title compound was prepared from tosylhydrazide (10.0 mmol) in MeOH (10.0 mL), ketone (1.0 equiv), *N*-tosylhydrazones **10b** was obtained as a white solid by recrystallization (isolated yield: 90%).

**<sup>1</sup>H NMR (500 MHz, DMSO-*d*<sub>6</sub>)** δ 10.60 (s, 1H), 8.42 (dd, *J* = 4.7, 1.8 Hz, 1H), 8.05 (dd, *J* = 8.0, 1.8 Hz, 1H), 7.81 (d, *J* = 8.3 Hz, 2H), 7.39 (d, *J* = 8.0 Hz, 2H), 7.23 (dd, *J* = 8.0, 4.7 Hz, 1H), 2.82 (t, *J* = 6.1 Hz, 2H), 2.55 (t, *J* = 6.5 Hz, 2H), 2.35 (s, 3H), 1.92 – 1.77 (m, 2H).

**<sup>13</sup>C NMR (126 MHz, DMSO-*d*<sub>6</sub>)** δ 158.6, 151.6, 149.7, 143.4, 136.1, 131.7, 129.5, 127.6, 127.3, 122.1, 31.6, 25.4, 21.0, 20.4.

**HRMS (ESI<sup>+</sup>), *m/z*:** calculated for C<sub>16</sub>H<sub>17</sub>N<sub>3</sub>O<sub>2</sub>S [M + H]<sup>+</sup>: 316.1114, found: 316.1136.

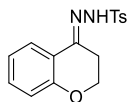

***N'*-(chroman-4-ylidene)-4-methylbenzenesulfonohydrazide (11b):** Prepared according to the synthesis of *N*-tosylhydrazones, the title compound was prepared from tosylhydrazide (10.0 mmol) in MeOH (10.0 mL) , ketone (1.0 equiv), *N*-tosylhydrazones **11b** was obtained as a white solid by recrystallization (isolated yield: 95%).

**<sup>1</sup>H NMR (500 MHz, CDCl<sub>3</sub>)** δ 7.94 – 7.84 (m, 3H), 7.33 (d, *J* = 8.1 Hz, 2H), 7.26 – 7.21 (m, 1H), 6.93 (ddd, *J* = 8.2, 7.2, 1.2 Hz, 1H), 6.84 (dd, *J* = 8.2, 1.2 Hz, 1H), 4.21 (t, *J* = 6.2 Hz, 2H), 2.68 (t, *J* = 6.2 Hz, 2H), 2.42 (s, 3H).

**<sup>13</sup>C NMR (126 MHz, CDCl<sub>3</sub>)** δ 156.7, 147.5, 143.9, 134.7, 131.1, 129.2, 127.7, 124.5, 121.1, 119.2, 117.1, 64.0, 24.6, 21.2.

**HRMS (ESI<sup>+</sup>), *m/z*:** calculated for C<sub>16</sub>H<sub>16</sub>N<sub>2</sub>O<sub>3</sub>S [*M* + *H*]<sup>+</sup>: 317.0954, found: 317.0988.

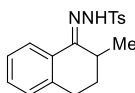

**4-Methyl-*N'*-(2-methyl-3,4-dihydronaphthalen-1(2*H*)-ylidene)benzenesulfonohydrazide (12b):**

Prepared according to the synthesis of *N*-tosylhydrazones, the title compound was prepared from tosylhydrazide (10.0 mmol) in MeOH (10.0 mL) , ketone (1.0 equiv), *N*-tosylhydrazones **12b** was obtained as a white solid by recrystallization (isolated yield: 85%).

**<sup>1</sup>H NMR (500 MHz, CDCl<sub>3</sub>)** δ 8.03 (dd, *J* = 8.0, 1.4 Hz, 1H), 7.92 (d, *J* = 8.4 Hz, 2H), 7.86 (s, 1H), 7.37 – 7.28 (m, 2H), 7.26 – 7.06 (m, 3H), 3.09 – 2.86 (m, 2H), 2.73 – 2.60 (m, 1H), 2.41 (s, 3H), 2.01 – 1.88 (m, 1H), 1.84 – 1.74 (m, 1H), 1.08 (d, *J* = 7.2 Hz, 3H).

**HRMS (ESI<sup>+</sup>), *m/z*:** calculated for C<sub>18</sub>H<sub>20</sub>N<sub>2</sub>O<sub>2</sub>S [*M* + *H*]<sup>+</sup>: 329.1318, found: 329.1356.

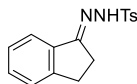

***N'*-(2,3-dihydro-1*H*-inden-1-ylidene)-4-methylbenzenesulfonohydrazide (13b):** Prepared according to the synthesis of *N*-tosylhydrazones, the title compound was prepared from tosylhydrazide (10.0 mmol) in MeOH (10.0 mL) , ketone (1.0 equiv), *N*-tosylhydrazones **13b** was obtained as a white solid by recrystallization (isolated yield: 78%).

**<sup>1</sup>H NMR (500 MHz, CDCl<sub>3</sub>)** δ 7.93 (s, 2H), 7.70 (d, *J* = 7.7 Hz, 1H), 7.34 – 7.29 (m, 3H), 7.28 – 7.20 (m, 2H), 3.08 – 2.99 (m, 2H), 2.73 – 2.63 (m, 2H), 2.40 (s, 3H).

**<sup>13</sup>C NMR (126 MHz, CDCl<sub>3</sub>)** δ 161.9, 147.9, 143.6, 136.6, 135.0, 130.4, 129.1, 127.6, 126.5, 124.9, 121.7, 27.9, 26.2, 21.1.

**HRMS (ESI<sup>+</sup>), *m/z*:** calculated for C<sub>16</sub>H<sub>16</sub>N<sub>2</sub>O<sub>2</sub>S [M + H]<sup>+</sup>: 301.1005, found: 301.1045.

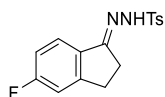

***N'*-(5-fluoro-2,3-dihydro-1*H*-inden-1-ylidene)-4-methylbenzenesulfonohydrazide (14b):** Prepared according to the synthesis of *N*-tosylhydrazones, the title compound was prepared from tosylhydrazide (10.0 mmol) in MeOH (10.0 mL) , ketone (1.0 equiv), *N*-tosylhydrazones **14b** was obtained as a white solid by recrystallization (isolated yield: 68%).

**<sup>1</sup>H NMR (500 MHz, DMSO-*d*<sub>6</sub>)** δ 10.35 (s, 1H), 7.81 (d, *J* = 8.4 Hz, 2H), 7.50 (dd, *J* = 8.5, 5.4 Hz, 1H), 7.45 – 7.36 (m, 2H), 7.21 (dd, *J* = 9.1, 2.4 Hz, 1H), 7.10 (td, *J* = 8.9, 2.5 Hz, 1H), 3.01 (t, *J* = 6.4 Hz, 2H), 2.81 – 2.69 (m, 2H), 2.37 (s, 3H).

**HRMS (ESI<sup>+</sup>), *m/z*:** calculated for C<sub>16</sub>H<sub>15</sub>FN<sub>2</sub>O<sub>2</sub>S [M + H]<sup>+</sup>: 319.0911, found: 319.0954.

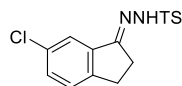

***N'*-(6-chloro-2,3-dihydro-1*H*-inden-1-ylidene)-4-methylbenzenesulfonohydrazide (15b):** Prepared according to the synthesis of *N*-tosylhydrazones, the title compound was prepared from tosylhydrazide (10.0 mmol) in MeOH (10.0 mL) , ketone (1.0 equiv), *N*-tosylhydrazones **15b** was obtained as a white solid by recrystallization (isolated yield: 80%).

**<sup>1</sup>H NMR (500 MHz, CDCl<sub>3</sub>)** δ 7.91 (d, *J* = 8.3 Hz, 2H), 7.66 (d, *J* = 2.0 Hz, 1H), 7.39 – 7.32 (m, 3H), 7.29 (dd, *J* = 8.1, 2.1 Hz, 1H), 7.20 (d, *J* = 8.2 Hz, 1H), 3.07 – 3.00 (m, 2H), 2.69 – 2.62 (m, 2H), 2.43 (s, 3H).

**HRMS (ESI+), *m/z*:** calculated for C<sub>16</sub>H<sub>15</sub>ClN<sub>2</sub>O<sub>2</sub>S [M + H]<sup>+</sup>: 335.0616, found: 335.0636.

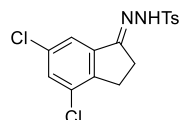

***N'*-(4,6-dichloro-2,3-dihydro-1*H*-inden-1-ylidene)-4-methylbenzenesulfonohydrazide (16b):**

Prepared according to the synthesis of *N*-tosylhydrazones, the title compound was prepared from tosylhydrazide (10.0 mmol) in MeOH (10.0 mL) , ketone (1.0 equiv), *N*-tosylhydrazones **16b** was obtained after column chromatography (hexane: EtO Ac, 2:1) as a white solid (isolated yield: 68%).

**<sup>1</sup>H NMR (500 MHz, CDCl<sub>3</sub>)** δ 7.90 (d, *J* = 8.1 Hz, 2H), 7.57 (d, *J* = 1.7 Hz, 1H), 7.40 – 7.31 (m, 4H), 3.09 – 2.98 (m, 2H), 2.72 – 2.61 (m, 2H), 2.43 (s, 3H).

**HRMS (ESI+), *m/z*:** calculated for C<sub>16</sub>H<sub>14</sub>Cl<sub>2</sub>N<sub>2</sub>O<sub>2</sub>S [M + H]<sup>+</sup>: 369.0226, found: 369.0220.

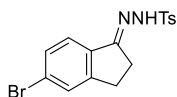

***N'*-(5-bromo-2,3-dihydro-1*H*-inden-1-ylidene)-4-methylbenzenesulfonohydrazide (17b):** Prepared according to the synthesis of *N*-tosylhydrazones, the title compound was prepared from tosylhydrazide (10.0 mmol) in MeOH (10.0 mL) , ketone (1.0 equiv), *N*-tosylhydrazones **17b** was obtained as a white solid by recrystallization (isolated yield: 92%).

**<sup>1</sup>H NMR (500 MHz, CDCl<sub>3</sub>)** δ 7.90 (d, *J* = 8.4 Hz, 2H), 7.56 (d, *J* = 8.2 Hz, 1H), 7.44 (d, *J* = 1.5 Hz, 1H), 7.37 (dd, *J* = 8.3, 1.7 Hz, 1H), 7.32 (d, *J* = 8.1 Hz, 3H), 3.14 – 2.92 (m, 2H), 2.70 – 2.57 (m, 2H), 2.42 (s, 3H).

**HRMS (ESI<sup>+</sup>), *m/z*:** calculated for C<sub>16</sub>H<sub>15</sub>BrN<sub>2</sub>O<sub>2</sub>S [M + H]<sup>+</sup>: 379.0110, found: 379.0134.

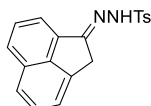

***N'*-(acenaphthylen-1(2*H*)-ylidene)-4-methylbenzenesulfonohydrazide (18b):** Prepared according to the synthesis of *N*-tosylhydrazones, the title compound was prepared from tosylhydrazide (10.0 mmol) in MeOH (10.0 mL) , ketone (1.0 equiv), *N*-tosylhydrazones **18b** was obtained after column chromatography (hexane: EtO Ac, 2:1) as a white solid (isolated yield: 85%).

**<sup>1</sup>H NMR (500 MHz, DMSO-*d*<sub>6</sub>)** δ 10.76 (s, 1H), 7.91 – 7.81 (m, 3H), 7.74 (dd, *J* = 8.3, 0.8 Hz, 1H), 7.64 (dd, *J* = 7.1, 0.8 Hz, 1H), 7.61 – 7.56 (m, 1H), 7.54 (dd, *J* = 8.3, 6.9 Hz, 1H), 7.43 – 7.37 (m, 3H), 4.01 (s, 2H), 2.35 (s, 3H).

**HRMS (ESI<sup>+</sup>), *m/z*:** calculated for C<sub>19</sub>H<sub>16</sub>N<sub>2</sub>O<sub>2</sub>S [M + H]<sup>+</sup>: 337.1005, found: 337.1034.

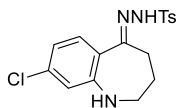

***N'*-(7-Chloro-3,4-dihydro-1*H*-benzo[*b*]azepin-5(2*H*)-ylidene)-4-methylbenzenesulfonohydrazide**

**(19b):** Prepared according to the synthesis of *N*-tosylhydrazones, the title compound was prepared from tosylhydrazide (10.0 mmol) in MeOH (10.0 mL), ketone (1.0 equiv), *N*-tosylhydrazones **19b** was obtained after column chromatography (hexane: EtO Ac, 2:1) as a white solid (isolated yield: 60%).

**<sup>1</sup>H NMR (500 MHz, DMSO-*d*<sub>6</sub>)** δ 10.54 (s, 1H), 7.75 (d, *J* = 8.3 Hz, 2H), 7.40 (d, *J* = 8.0 Hz, 2H), 7.03 (dd, *J* = 8.7, 2.6 Hz, 1H), 6.96 (dd, *J* = 2.7, 1.3 Hz, 1H), 6.69 (d, *J* = 8.7 Hz, 1H), 6.29 (s, 1H), 2.89 (s, 2H), 2.59 (t, *J* = 6.9 Hz, 2H), 2.37 (s, 3H), 1.88 (m, 2H).

**<sup>13</sup>C NMR (126 MHz, DMSO-*d*<sub>6</sub>)** δ 157.1, 149.8, 143.3, 136.3, 129.5, 128.6, 127.4, 127.3, 124.4, 120.4, 118.7, 44.9, 29.3, 27.2, 21.0.

**HRMS (ESI<sup>+</sup>), *m/z*:** calculated for C<sub>17</sub>H<sub>18</sub>ClN<sub>3</sub>O<sub>2</sub>S [M + H]<sup>+</sup>: 364.0881, found: 364.0923.

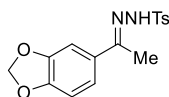

***N'*-(1-(benzo[*d*][1,3]dioxol-5-yl)ethylidene)-4-methylbenzenesulfonohydrazide (21b):** Prepared according to the synthesis of *N*-tosylhydrazones, the title compound was prepared from tosylhydrazide (10.0 mmol) in MeOH (10.0 mL), ketone (1.0 equiv), *N*-tosylhydrazones **21b** was obtained as a white solid by recrystallization (isolated yield: 78%).

**<sup>1</sup>H NMR (500 MHz, CDCl<sub>3</sub>)** δ 8.00 (s, 1H), 7.91 (d, *J* = 8.3 Hz, 2H), 7.31 (d, *J* = 8.1 Hz, 2H), 7.07 (dd, *J* = 8.2, 1.8 Hz, 1H), 6.74 (d, *J* = 8.2 Hz, 1H), 5.96 (s, 2H), 2.41 (s, 3H), 2.11 (s, 3H).

**HRMS (ESI<sup>+</sup>), *m/z*:** calculated for C<sub>16</sub>H<sub>16</sub>N<sub>2</sub>O<sub>4</sub>S [M + H]<sup>+</sup>: 333.0904, found: 333.0924.



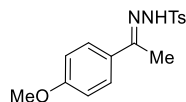

***N'*-(1-(4-methoxyphenyl)ethylidene)-4-methylbenzenesulfonohydrazide (22b):** Prepared according to the synthesis of *N*-tosylhydrazones, the title compound was prepared from tosylhydrazide (10.0 mmol) in MeOH (10.0 mL), ketone (1.0 equiv), *N*-tosylhydrazones **22b** was obtained as a white solid by recrystallization (isolated yield: 88%).

**<sup>1</sup>H NMR (500 MHz, CDCl<sub>3</sub>)** δ 7.92 (d, *J* = 8.4 Hz, 2H), 7.83 – 7.73 (m, 1H), 7.60 (d, *J* = 8.9 Hz, 2H), 7.35 – 7.28 (m, 2H), 6.85 (d, *J* = 8.8 Hz, 2H), 3.81 (s, 3H), 2.41 (s, 3H), 2.13 (s, 3H).

**HRMS (ESI+), *m/z*:** calculated for C<sub>16</sub>H<sub>18</sub>N<sub>2</sub>O<sub>3</sub>S [M + H]<sup>+</sup>: 319.1111, found: 319.1134.

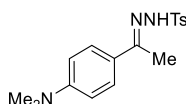

***N'*-(1-(4-(dimethylamino)phenyl)ethylidene)-4-methylbenzenesulfonohydrazide (24b):** Prepared according to the synthesis of *N*-tosylhydrazones, the title compound was prepared from tosylhydrazide (10.0 mmol) in MeOH (10.0 mL), ketone (1.0 equiv), *N*-tosylhydrazones **24b** was obtained as a white solid by recrystallization (isolated yield: 76%).

**<sup>1</sup>H NMR (500 MHz, CDCl<sub>3</sub>)** δ 7.92 (d, *J* = 8.3 Hz, 2H), 7.57 (d, *J* = 9.0 Hz, 2H), 7.30 (d, *J* = 7.8 Hz, 2H), 6.64 (d, *J* = 9.0 Hz, 2H), 2.98 (s, 6H), 2.40 (s, 3H), 2.10 (s, 3H).

**<sup>13</sup>C NMR (126 MHz, CDCl<sub>3</sub>)** δ 153.2, 150.8, 143.4, 135.1, 129.0, 127.7, 127.0, 124.4, 111.0, 39.8, 21.1, 12.6.

**HRMS (ESI+), *m/z*:** calculated for C<sub>17</sub>H<sub>21</sub>N<sub>3</sub>O<sub>2</sub>S [M + H]<sup>+</sup>: 332.1427, found: 332.1454.

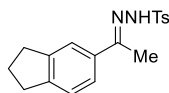

***N'*-(1-(2,3-Dihydro-1*H*-inden-5-yl)ethylidene)-4-methylbenzenesulfonohydrazide (25b):** Prepared according to the synthesis of *N*-tosylhydrazones, the title compound was prepared from tosylhydrazide (10.0 mmol) in MeOH (10.0 mL) , ketone (1.0 equiv), *N*-tosylhydrazones **25b** was obtained as a white solid by recrystallization (isolated yield: 84%).

**<sup>1</sup>H NMR (500 MHz, CDCl<sub>3</sub>)** δ 7.96 – 7.90 (m, 2H), 7.51 (d, *J* = 1.7 Hz, 1H), 7.42 (dd, *J* = 7.9, 1.7 Hz, 1H), 7.34 – 7.27 (m, 2H), 7.18 (d, *J* = 7.9 Hz, 1H), 2.89 (td, *J* = 7.5, 3.2 Hz, 4H), 2.40 (s, 3H), 2.15 (s, 3H), 2.07 (m, 2H).

**<sup>13</sup>C NMR (126 MHz, CDCl<sub>3</sub>)** δ 152.9, 145.7, 144.0, 143.6, 135.1, 135.1, 129.1, 127.7, 124.1, 123.6, 121.8, 32.3, 32.3, 25.0, 21.1, 13.3.

**HRMS (ESI+), *m/z*:** calculated for C<sub>18</sub>H<sub>20</sub>N<sub>2</sub>O<sub>2</sub>S [M+Na]<sup>+</sup>: 351.1143, found: 351.1124.

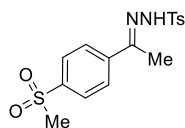

**4-methyl-*N'*-(1-(4-(methylsulfonyl)phenyl)ethylidene)benzenesulfonohydrazide (26b):** Prepared according to the synthesis of *N*-tosylhydrazones, the title compound was prepared from tosylhydrazide (10.0 mmol) in MeOH (10.0 mL) , ketone (1.0 equiv), *N*-tosylhydrazones **26b** was obtained as a white solid by recrystallization (isolated yield: 82%).

**<sup>1</sup>H NMR (500 MHz, DMSO-*d*<sub>6</sub>)** δ 10.80 (s, 1H), 7.94 – 7.71 (m, 6H), 7.39 (d, *J* = 8.1 Hz, 2H), 3.20 (s, 3H), 2.34 (s, 3H), 2.20 (s, 3H).

**HRMS (ESI+), *m/z*:** calculated for C<sub>16</sub>H<sub>18</sub>N<sub>2</sub>O<sub>4</sub>S<sub>2</sub>[M+Na]<sup>+</sup>: 389.0606, found: 389.0648.

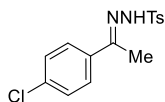

***N'*-(1-(4-Chlorophenyl)ethylidene)-4-methylbenzenesulfonohydrazide (27b):** Prepared according to the synthesis of *N*-tosylhydrazones, the title compound was prepared from tosylhydrazide (10.0 mmol) in MeOH (10.0 mL), ketone (1.0 equiv), *N*-tosylhydrazones **27b** was obtained as a white solid by recrystallization (isolated yield: 95%).

**<sup>1</sup>H NMR (500 MHz, CDCl<sub>3</sub>)** δ 8.08 (d, *J* = 3.4 Hz, 1H), 7.91 (d, *J* = 8.4 Hz, 2H), 7.57 (d, *J* = 8.6 Hz, 2H), 7.37 – 7.28 (m, 4H), 2.41 (s, 3H), 2.14 (s, 3H).

**<sup>13</sup>C NMR (126 MHz, CDCl<sub>3</sub>)** δ 150.9, 143.8, 135.2, 135.1, 134.8, 129.2, 128.1, 127.6, 127.1, 21.2, 12.9.

**HRMS (ESI<sup>+</sup>), *m/z*:** calculated for C<sub>15</sub>H<sub>15</sub>ClN<sub>2</sub>O<sub>2</sub>S [M+Na]<sup>+</sup>: 345.0440, found: 345.0404.

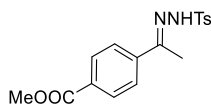

**Methyl 4-(1-(2-tosylhydrazono)ethyl)benzoate (28b):** Prepared according to the synthesis of *N*-tosylhydrazones, the title compound was prepared from tosylhydrazide (10.0 mmol) in MeOH (10.0 mL), ketone (1.0 equiv), *N*-tosylhydrazones **28b** was obtained as a white solid by recrystallization (isolated yield: 99%).

**<sup>1</sup>H NMR (500 MHz, CDCl<sub>3</sub>)** δ 8.05 (s, 1H), 7.99 (d, *J* = 8.6 Hz, 2H), 7.92 (d, *J* = 8.4 Hz, 2H), 7.70 (d, *J* = 8.5 Hz, 2H), 7.35 – 7.30 (m, 2H), 3.91 (s, 3H), 2.41 (s, 3H), 2.17 (s, 3H).

**<sup>13</sup>C NMR (126 MHz, CDCl<sub>3</sub>)** δ 166.2, 150.6, 143.9, 140.8, 134.8, 130.3, 129.2, 129.1, 127.7, 125.7, 51.8, 21.2, 12.9.

**HRMS (ESI<sup>+</sup>), *m/z*:** calculated for C<sub>17</sub>H<sub>18</sub>N<sub>2</sub>O<sub>4</sub>S [M+Na]<sup>+</sup>: 369.0885, found: 369.0897.

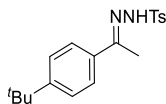

***N'*-(1-(4-(*tert*-Butyl)phenyl)ethylidene)-4-methylbenzenesulfonohydrazide (29b):** Prepared according to the synthesis of *N*-tosylhydrazones, the title compound was prepared from tosylhydrazide (10.0 mmol) in MeOH (10.0 mL), ketone (1.0 equiv), *N*-tosylhydrazones **29b** was obtained as a white solid by recrystallization (isolated yield: 97%).

**<sup>1</sup>H NMR (500 MHz, CDCl<sub>3</sub>)** δ 7.98 – 7.89 (m, 2H), 7.86 – 7.73 (m, 1H), 7.64 – 7.54 (m, 2H), 7.34 (dd, *J* = 22.2, 8.3 Hz, 4H), 2.41 (s, 3H), 2.14 (s, 3H), 1.31 (s, 9H).

**<sup>13</sup>C NMR (126 MHz, CDCl<sub>3</sub>)** δ 152.4, 152.2, 143.6, 135.0, 134.0, 129.1, 127.7, 125.6, 124.8, 34.2, 30.7, 30.7, 21.2, 12.9.

**HRMS (ESI+), *m/z*:** calculated for C<sub>19</sub>H<sub>25</sub>N<sub>2</sub>O<sub>2</sub>S [M+H]<sup>+</sup>: 345.1637, found: 345.1624.

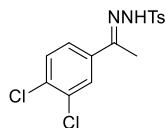

***N'*-(1-(3,4-dichlorophenyl)ethylidene)-4-methylbenzenesulfonohydrazide (30b):** Prepared according to the synthesis of *N*-tosylhydrazones, the title compound was prepared from tosylhydrazide (10.0 mmol) in MeOH (10.0 mL), ketone (1.0 equiv), *N*-tosylhydrazones **30b** was obtained as a white solid by recrystallization (isolated yield: 86%).

**<sup>1</sup>H NMR (500 MHz, CDCl<sub>3</sub>)** δ 7.95 – 7.85 (m, 3H), 7.70 (d, *J* = 2.1 Hz, 1H), 7.47 (dd, *J* = 8.5, 2.1 Hz, 1H), 7.40 (d, *J* = 8.5 Hz, 1H), 7.36 – 7.30 (m, 2H), 2.43 (s, 3H), 2.12 (s, 3H).

**<sup>13</sup>C NMR (126 MHz, CDCl<sub>3</sub>)** δ 149.3, 144.0, 136.7, 134.7, 133.2, 132.2, 129.8, 129.2, 127.7, 127.7, 124.9, 21.2, 12.7.

**HRMS (ESI+), *m/z*:** calculated for C<sub>15</sub>H<sub>14</sub>Cl<sub>2</sub>N<sub>2</sub>O<sub>2</sub>S [M+Na]<sup>+</sup>: 379.0051, found: 379.0028.

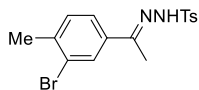

***N'*-(1-(3-bromo-4-methylphenyl) ethylidene)-4-methylbenzenesulfonohydrazide (31b):** Prepared according to the synthesis of *N*-tosylhydrazones, the title compound was prepared from tosylhydrazide (10.0 mmol) in MeOH (10.0 mL) , ketone (1.0 equiv), *N*-tosylhydrazones **31b** was obtained as a white solid by recrystallization (isolated yield: 81%).

**<sup>1</sup>H NMR (500 MHz, CDCl<sub>3</sub>)** δ 7.91 (d, *J* = 8.4 Hz, 2H), 7.78 (d, *J* = 1.9 Hz, 1H), 7.69 (s, 1H), 7.48 (dd, *J* = 8.0, 1.9 Hz, 1H), 7.37 – 7.30 (m, 2H), 7.19 (dd, *J* = 8.0, 0.8 Hz, 1H), 2.42 (s, 3H), 2.38 (s, 3H), 2.10 (s, 3H).

**HRMS (ESI+), *m/z*:** calculated for C<sub>16</sub>H<sub>17</sub>BrN<sub>2</sub>O<sub>2</sub>S [M+Na]<sup>+</sup>: 403.0092, found: 403.0085.

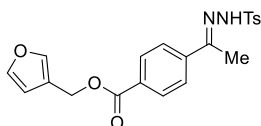

**furan-2-ylmethyl 4-(1-(2-tosylhydrazono)ethyl)benzoate (34b):** Prepared according to the synthesis of *N*-tosylhydrazones, the title compound was prepared from tosylhydrazide (10.0 mmol) in MeOH (10.0 mL) , ketone (1.0 equiv), *N*-tosylhydrazones **34b** was obtained after column chromatography (hexane: EtO Ac, 2:1) as a white solid (isolated yield: 59%).

**<sup>1</sup>H NMR (500 MHz, CDCl<sub>3</sub>)** δ 8.00 (d, *J* = 8.6 Hz, 3H), 7.91 (d, *J* = 8.3 Hz, 2H), 7.68 (d, *J* = 8.5 Hz, 2H), 7.45 (dd, *J* = 1.9, 0.9 Hz, 1H), 7.34 – 7.29 (m, 2H), 6.49 (d, *J* = 3.2 Hz, 1H), 6.39 (dd, *J* = 3.2, 1.9 Hz, 1H), 5.30 (s, 2H), 2.41 (s, 3H), 2.16 (s, 3H).

**<sup>13</sup>C NMR (126 MHz, CDCl<sub>3</sub>)** δ 165.3, 150.5, 148.9, 143.9, 142.9, 141.0, 134.7, 130.1, 129.3, 129.2, 127.7, 125.7, 110.5, 110.2, 58.2, 21.2, 12.9.

**HRMS (ESI+), *m/z*:** calculated for C<sub>21</sub>H<sub>20</sub>N<sub>2</sub>O<sub>5</sub>S [M+Na]<sup>+</sup>: 435.0991, found: 435.0970.

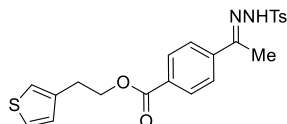

**2-(thiophen-2-yl)ethyl 4-(1-(2-tosylhydrazono)ethyl)benzoate (35b):** Prepared according to the synthesis of *N*-tosylhydrazones, the title compound was prepared from tosylhydrazide (10.0 mmol) in MeOH (10.0 mL), ketone (1.0 equiv), *N*-tosylhydrazones **35b** was obtained after column chromatography (hexane: EtO Ac, 2:1) as a white solid (isolated yield: 89%).

**<sup>1</sup>H NMR (500 MHz, DMSO-*d*<sub>6</sub>)** δ 10.71 (s, 1H), 7.93 (d, *J* = 8.6 Hz, 2H), 7.85 – 7.71 (m, 4H), 7.47 – 7.30 (m, 3H), 7.06 – 6.86 (m, 2H), 4.45 (t, *J* = 6.3 Hz, 2H), 3.25 (t, *J* = 6.3 Hz, 2H), 2.35 (s, 3H), 2.18 (s, 3H).

**<sup>13</sup>C NMR (126 MHz, CDCl<sub>3</sub>)** δ 167.2, 152.5, 150.8, 145.8, 144.8, 142.9, 136.6, 131.9, 131.2, 131.1, 129.7, 129.6, 127.6, 112.4, 112.1, 60.1, 23.1, 14.8.

**HRMS (ESI<sup>+</sup>), *m/z*:** calculated for C<sub>22</sub>H<sub>22</sub>N<sub>2</sub>O<sub>4</sub>S [M+H]<sup>+</sup>: 443.1099, found: 443.1070.

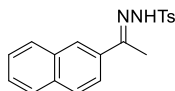

**4-methyl-*N'*-(1-(naphthalen-2-yl)ethylidene)benzenesulfonohydrazide (33b):** Prepared according to the synthesis of *N*-tosylhydrazones, the title compound was prepared from tosylhydrazide (10.0 mmol) in MeOH (10.0 mL), ketone (1.0 equiv), *N*-tosylhydrazones **33b** was obtained as a white solid by recrystallization (isolated yield: 95%).

**<sup>1</sup>H NMR (500 MHz, CDCl<sub>3</sub>)** δ 7.92 (d, *J* = 8.4 Hz, 3H), 7.86 – 7.77 (m, 3H), 7.49 – 7.39 (m, 2H), 7.38 – 7.30 (m, 4H), 2.46 (s, 3H), 2.31 (s, 3H).

**<sup>13</sup>C NMR (126 MHz, CDCl<sub>3</sub>)** δ 154.1, 143.7, 136.0, 135.0, 133.4, 129.8, 129.2, 129.0, 128.0, 127.8, 126.0, 125.7, 125.5, 125.0, 124.5, 21.2, 17.7.

**HRMS (ESI<sup>+</sup>), *m/z*:** calculated for C<sub>19</sub>H<sub>18</sub>N<sub>2</sub>O<sub>2</sub>S [M+H]<sup>+</sup>: 339.1167, found: 339.1154.

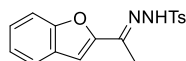

***N'*-(1-(benzofuran-2-yl)ethylidene)-4-methylbenzenesulfonohydrazide (36b):** Prepared according to the synthesis of *N*-tosylhydrazones, the title compound was prepared from tosylhydrazide (10.0 mmol) in MeOH (10.0 mL), ketone (1.0 equiv), *N*-tosylhydrazones **36b** was obtained as a white solid by recrystallization (isolated yield: 80%).

**<sup>1</sup>H NMR (500 MHz, CDCl<sub>3</sub>)** δ 7.95 (d, *J* = 8.4 Hz, 2H), 7.73 (s, 1H), 7.62 – 7.43 (m, 2H), 7.38 – 7.30 (m, 3H), 7.23 (ddd, *J* = 8.1, 7.3, 1.0 Hz, 1H), 7.05 (d, *J* = 1.0 Hz, 1H), 2.41 (s, 3H), 2.18 (s, 3H).

**HRMS (ESI+), *m/z*:** calculated for C<sub>17</sub>H<sub>16</sub>N<sub>2</sub>O<sub>3</sub>S [M+Na]<sup>+</sup>: 351.0779, found: 351.0759.

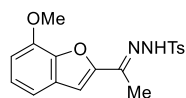

***N'*-(1-(7-methoxybenzofuran-2-yl)ethylidene)-4-methylbenzenesulfonohydrazide (37b):** Prepared according to the synthesis of *N*-tosylhydrazones, the title compound was prepared from tosylhydrazide (10.0 mmol) in MeOH (10.0 mL), ketone (1.0 equiv), *N*-tosylhydrazones **37b** was obtained as a white solid by recrystallization (isolated yield: 99%).

**<sup>1</sup>H NMR (500 MHz, DMSO-*d*<sub>6</sub>)** δ 10.79 (s, 1H), 7.81 (d, *J* = 8.0 Hz, 2H), 7.40 (d, *J* = 8.3 Hz, 2H), 7.24 (s, 1H), 7.21 – 7.12 (m, 2H), 6.95 (dd, *J* = 7.7, 1.2 Hz, 1H), 3.93 (s, 3H), 2.35 (s, 3H), 2.19 (s, 3H).

**<sup>13</sup>C NMR (126 MHz, DMSO-*d*<sub>6</sub>)** δ 152.9, 144.9, 144.6, 143.6, 143.5, 136.2, 129.6, 129.4, 127.4, 124.1, 113.7, 108.2, 107.4, 55.8, 21.0, 13.9.

**HRMS (ESI+), *m/z*:** calculated for C<sub>18</sub>H<sub>18</sub>N<sub>2</sub>O<sub>4</sub>S [M+Na]<sup>+</sup>: 381.0885, found: 381.0816.

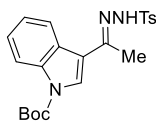

**tert-butyl 3-(1-(2-tosylhydrazono)ethyl)-1H-indole-1-carboxylate (38b):** Prepared according to the synthesis of *N*-tosylhydrazones, the title compound was prepared from tosylhydrazide (10.0 mmol) in MeOH (10.0 mL), ketone (1.0 equiv), *N*-tosylhydrazones **38b** was obtained as a white solid by recrystallization (isolated yield: 78%).

**<sup>1</sup>H NMR (500 MHz, DMSO-*d*<sub>6</sub>)** δ 10.56 (s, 1H), 8.10 – 8.02 (m, 2H), 8.01 (s, 1H), 7.87 (d, *J* = 8.2 Hz, 2H), 7.42 (d, *J* = 8.1 Hz, 2H), 7.35 (m, 1H), 7.25 (td, *J* = 7.6, 7.2, 1.0 Hz, 1H), 2.36 (s, 3H), 2.23 (s, 3H), 1.63 (s, 9H).

**HRMS (ESI+), *m/z*:** calculated for C<sub>22</sub>H<sub>25</sub>N<sub>3</sub>O<sub>4</sub>S [M+H]<sup>+</sup>: 428.1639, found: 428.1666.

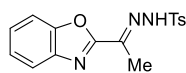

***N'*-(1-(benzo[d]oxazol-2-yl)ethylidene)-4-methylbenzenesulfonohydrazide (39b):** Prepared according to the synthesis of *N*-tosylhydrazones, the title compound was prepared from tosylhydrazide (10.0 mmol) in MeOH (10.0 mL), ketone (1.0 equiv), *N*-tosylhydrazones **39b** was obtained as a white solid by recrystallization (isolated yield: 95%).

**<sup>1</sup>H NMR (500 MHz, DMSO-*d*<sub>6</sub>)** δ 11.42 (s, 1H), 7.89 – 7.73 (m, 4H), 7.47 – 7.31 (m, 4H), 2.35 (s, 3H), 2.32 (s, 3H).

**<sup>13</sup>C NMR (126 MHz, DMSO-*d*<sub>6</sub>)** δ 160.2, 150.2, 143.8, 141.5, 140.7, 136.0, 129.7, 127.3, 126.5, 125.0, 120.3, 111.2, 21.0, 14.0.

**HRMS (ESI+), *m/z*:** calculated for C<sub>16</sub>H<sub>15</sub>N<sub>3</sub>O<sub>3</sub>S [M+Na]<sup>+</sup>: 352.0732, found: 352.0748.

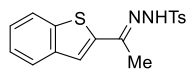

***N'*-(1-(benzo[b]thiophen-2-yl)ethylidene)-4-methylbenzenesulfonohydrazide (40b):** Prepared according to the synthesis of *N*-tosylhydrazones, the title compound was prepared from tosylhydrazide (10.0 mmol) in MeOH (10.0 mL), ketone (1.0 equiv), *N*-tosylhydrazones **40b** was obtained after column chromatography (hexane: EtO Ac, 2:1) as a white solid (isolated yield: 75%).

**<sup>1</sup>H NMR (500 MHz, DMSO-*d*<sub>6</sub>)** δ 10.73 (s, 1H), 7.96 – 7.89 (m, 1H), 7.82 (td, *J* = 8.1, 1.8 Hz, 3H), 7.75 (d, *J* = 0.8 Hz, 1H), 7.44 (d, *J* = 7.9 Hz, 2H), 7.40 – 7.28 (m, 2H), 2.38 (s, 3H), 2.26 (s, 3H).

**HRMS (ESI+), *m/z*:** calculated for C<sub>17</sub>H<sub>16</sub>N<sub>2</sub>O<sub>2</sub>S<sub>2</sub> [M + H]<sup>+</sup>: 345.0726, found: 345.0764.



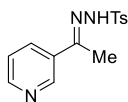

**4-Methyl-*N'*-(1-(pyridin-4-yl)ethylidene)benzenesulfonohydrazide (41b):** Prepared according to the synthesis of *N*-tosylhydrazones, the title compound was prepared from tosylhydrazide (10.0 mmol) in MeOH (10.0 mL) , ketone (1.0 equiv), *N*-tosylhydrazones **41b** was obtained after column chromatography (hexane: EtO Ac, 2:1) as a white solid (isolated yield: 60%).

**<sup>1</sup>H NMR (500 MHz, CDCl<sub>3</sub>)** δ 8.84 (d, *J* = 2.4 Hz, 1H), 8.71 – 8.53 (m, 1H), 8.19 – 8.06 (m, 1H), 7.96 (ddd, *J* = 8.1, 2.4, 1.6 Hz, 1H), 7.91 (d, *J* = 8.4 Hz, 2H), 7.38 – 7.31 (m, 2H), 7.29 (ddd, *J* = 8.1, 4.8, 0.8 Hz, 1H), 2.42 (s, 3H), 2.18 (s, 3H).

**HRMS (ESI+), *m/z*:** calculated for C<sub>14</sub>H<sub>15</sub>N<sub>3</sub>O<sub>2</sub>S [M+Na]<sup>+</sup>: 312.0783, found: 312.0759.

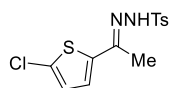

***N'*-(1-(5-chlorothiophen-2-yl)ethylidene)-4-methylbenzenesulfonohydrazide (43b):** Prepared according to the synthesis of *N*-tosylhydrazones, the title compound was prepared from tosylhydrazide (10.0 mmol) in MeOH (10.0 mL) , ketone (1.0 equiv), *N*-tosylhydrazones **43b** was obtained after column chromatography (hexane: EtO Ac, 2:1) as a white solid (isolated yield: 78%).

**<sup>1</sup>H NMR (500 MHz, CDCl<sub>3</sub>)** δ 7.94 – 7.82 (m, 3H), 7.39 – 7.30 (m, 2H), 6.94 (d, *J* = 4.0 Hz, 1H), 6.77 (d, *J* = 4.0 Hz, 1H), 2.43 (s, 3H), 2.10 (s, 3H).

**<sup>13</sup>C NMR (126 MHz, CDCl<sub>3</sub>)** δ 147.9, 143.9, 140.7, 134.5, 132.8, 129.2, 127.8, 125.8, 125.6, 21.2, 12.5.

**HRMS (ESI+), *m/z*:** calculated for C<sub>13</sub>H<sub>13</sub>ClN<sub>2</sub>O<sub>2</sub>S<sub>2</sub> [M + H]<sup>+</sup>: 329.0180, found: 329.0210.

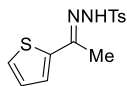

**4-methyl-*N'*-(1-(thiophen-2-yl)ethylidene)benzenesulfonohydrazide (44b):** Prepared according to the synthesis of *N*-tosylhydrazones, the title compound was prepared from tosylhydrazide (10.0 mmol) in MeOH (10.0 mL) , ketone (1.0 equiv), *N*-tosylhydrazones **44b** was obtained as a white solid by recrystallization (isolated yield: 80%).

**<sup>1</sup>H NMR (500 MHz, CDCl<sub>3</sub>)** δ 7.92 (d, *J* = 8.4 Hz, 2H), 7.37 (s, 1H), 7.34 – 7.29 (m, 3H), 7.21 (dd, *J* = 3.7, 1.1 Hz, 1H), 6.97 (dd, *J* = 5.1, 3.7 Hz, 1H), 2.42 (s, 3H), 2.15 (s, 3H).

**HRMS (ESI+), *m/z*:** calculated for C<sub>13</sub>H<sub>14</sub>N<sub>2</sub>O<sub>2</sub>S<sub>2</sub> [M + H]<sup>+</sup>: 295.0569, found: 295.0583.

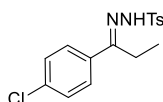

***N'*-(1-(4-chlorophenyl)propylidene)-4-methylbenzenesulfonohydrazide (45b):** Prepared according to the synthesis of *N*-tosylhydrazones, the title compound was prepared from tosylhydrazide (10.0 mmol) in MeOH (10.0 mL) , ketone (1.0 equiv), *N*-tosylhydrazones **45b** was obtained after column chromatography (hexane: EtOAc, 2:1) as a white solid (isolated yield: 77%).

**<sup>1</sup>H NMR (500 MHz, CDCl<sub>3</sub>)** δ 7.99 (s, 1H), 7.90 (d, *J* = 8.4 Hz, 2H), 7.57 (d, *J* = 8.6 Hz, 2H), 7.33 – 7.29 (m, 4H), 2.56 (q, *J* = 7.8 Hz, 2H), 2.42 (s, 3H), 1.08 (t, *J* = 7.7 Hz, 3H).

**HRMS (ESI+), *m/z*:** calculated for C<sub>16</sub>H<sub>17</sub>ClN<sub>2</sub>O<sub>2</sub>S [M + H]<sup>+</sup>: 337.0772, found: 337.0782.

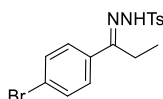

***N'*-(1-(4-bromophenyl)propylidene)-4-methylbenzenesulfonohydrazide (46b):** Prepared according to the synthesis of *N*-tosylhydrazones, the title compound was prepared from tosylhydrazide (10.0 mmol) in MeOH (10.0 mL) , ketone (1.0 equiv), *N*-tosylhydrazones **46b** was obtained after column chromatography (hexane: EtOAc, 2:1) as a white solid (isolated yield: 79%).

**<sup>1</sup>H NMR (500 MHz, CDCl<sub>3</sub>)** δ 8.00 – 7.90 (m, 3H), 7.61 (s, 1H), 7.36 – 7.27 (m, 3H), 7.23 – 7.14 (m, 2H), 2.87 (td, *J* = 7.0, 4.1 Hz, 1H), 2.53 (s, 1H), 2.41 (s, 3H), 1.24 (d, *J* = 7.0 Hz, 3H).

**HRMS (ESI+), *m/z*:** calculated for C<sub>16</sub>H<sub>18</sub>BrN<sub>2</sub>O<sub>2</sub>S [M + H]<sup>+</sup>: 381.0267, found: 381.0288.

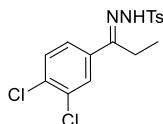

***N'*-(1-(3,4-Dichlorophenyl)propylidene)-4-methylbenzenesulfonohydrazide (47b):** Prepared according to the synthesis of *N*-tosylhydrazones, the title compound was prepared from tosylhydrazide (10.0 mmol) in MeOH (10.0 mL), ketone (1.0 equiv), *N*-tosylhydrazones **47b** was obtained after column chromatography (hexane: EtO Ac, 2:1) as a white solid (isolated yield: 86%).

**<sup>1</sup>H NMR (500 MHz, CDCl<sub>3</sub>)** δ 7.96 – 7.86 (m, 3H), 7.69 (d, *J* = 2.2 Hz, 1H), 7.47 (dd, *J* = 8.5, 2.1 Hz, 1H), 7.41 (d, *J* = 8.5 Hz, 1H), 7.37 – 7.31 (m, 2H), 2.53 (q, *J* = 7.7 Hz, 2H), 2.43 (s, 3H), 1.08 (t, *J* = 7.7 Hz, 3H).

**HRMS (ESI<sup>+</sup>), *m/z*:** calculated for C<sub>16</sub>H<sub>16</sub>Cl<sub>2</sub>N<sub>2</sub>O<sub>2</sub>S [M + H]<sup>+</sup>: 371.0382, found: 371.0366.

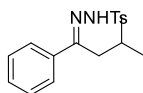

**4-Methyl-*N'*-(3-methyl-1-phenylbutylidene)benzenesulfonohydrazide (48b):** Prepared according to the synthesis of *N*-tosylhydrazones, the title compound was prepared from tosylhydrazide (10.0 mmol) in MeOH (10.0 mL), ketone (1.0 equiv), *N*-tosylhydrazones **48b** was obtained as a white solid by recrystallization (isolated yield: 87%).

**<sup>1</sup>H NMR (500 MHz, CDCl<sub>3</sub>)** δ 7.90 (d, *J* = 8.3 Hz, 2H), 7.73 (s, 1H), 7.66 – 7.54 (m, 2H), 7.37 – 7.29 (m, 5H), 2.47 (d, *J* = 7.6 Hz, 2H), 2.41 (s, 3H), 1.88 (dt, *J* = 13.7, 6.9 Hz, 1H), 0.86 (d, *J* = 6.6 Hz, 6H).

**HRMS (ESI<sup>+</sup>), *m/z*:** calculated for C<sub>18</sub>H<sub>22</sub>N<sub>2</sub>O<sub>2</sub>S [M + H]<sup>+</sup>: 331.1475, found: 331.1482.

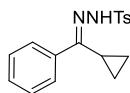

***N'*-(cyclopropyl(phenyl)methylene)-4-methylbenzenesulfonohydrazide (50b):** Prepared according to the synthesis of *N*-tosylhydrazones, the title compound was prepared from tosylhydrazide (10.0 mmol) in MeOH (10.0 mL), ketone (1.0 equiv), *N*-tosylhydrazones **50b** was obtained after column chromatography (hexane: EtOAc, 2:1) as a white solid (isolated yield: 56%).

**<sup>1</sup>H NMR (500 MHz, CDCl<sub>3</sub>)** δ 7.89 (d, *J* = 8.3 Hz, 1H), 7.76 (d, *J* = 8.3 Hz, 1H), 7.70 – 7.59 (m, 1H), 7.48 – 7.42 (m, 1H), 7.38 – 7.30 (m, 3H), 7.09 (dd, *J* = 7.5, 2.0 Hz, 1H), 2.43 (d, *J* = 16.8 Hz, 3H), 1.78 – 1.70 (m, 1H), 1.10 (dd, *J* = 8.5, 1.9 Hz, 1H), 0.76 (dd, *J* = 8.1, 2.6 Hz, 1H), 0.67 (dd, *J* = 4.9, 2.4 Hz, 1H), 0.49 (dd, *J* = 5.9, 1.7 Hz, 1H).

**HRMS (ESI<sup>+</sup>), *m/z*:** calculated for C<sub>17</sub>H<sub>18</sub>N<sub>2</sub>O<sub>2</sub>S [M + H]<sup>+</sup>: 315.1162, found: 315.1176.

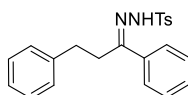

***N'*-(1,3-Diphenylpropylidene)-4-methylbenzenesulfonohydrazide (51b):** Prepared according to the synthesis of *N*-tosylhydrazones, the title compound was prepared from tosylhydrazide (10.0 mmol) in MeOH (10.0 mL), ketone (1.0 equiv), *N*-tosylhydrazones **51b** was obtained after column chromatography (hexane: EtOAc, 2:1) as a white solid (isolated yield: 77%).

**<sup>1</sup>H NMR (500 MHz, CDCl<sub>3</sub>)** δ 7.76 – 7.58 (m, 4H), 7.43 – 7.34 (m, 3H), 7.30 (d, *J* = 8.0 Hz, 2H), 7.18 (dd, *J* = 7.4, 2.0 Hz, 3H), 7.14 – 7.03 (m, 2H), 6.84 (s, 1H), 2.95 (t, *J* = 7.2 Hz, 2H), 2.80 (t, *J* = 7.2 Hz, 2H), 2.44 (s, 3H).

**HRMS (ESI<sup>+</sup>), *m/z*:** calculated for C<sub>22</sub>H<sub>23</sub>N<sub>2</sub>O<sub>2</sub>S [M + H]<sup>+</sup>: 379.1475, found: 379.1466.

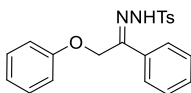

**4-Methyl-*N'*-(2-phenoxy-1-phenylethylidene)benzenesulfonohydrazide (52b):** Prepared according to the synthesis of *N*-tosylhydrazones, the title compound was prepared from tosylhydrazide (10.0 mmol) in MeOH (10.0 mL), ketone (1.0 equiv), *N*-tosylhydrazones **52b** was obtained after column chromatography (hexane: EtO Ac, 2:1) as a white solid (isolated yield: 86%).

**<sup>1</sup>H NMR (500 MHz, CDCl<sub>3</sub>)** δ 9.23 (s, 1H), 7.80 (dd, *J* = 8.2, 5.6 Hz, 4H), 7.70 (s, 1H), 7.61 (dd, *J* = 8.0, 1.7 Hz, 2H), 7.47 – 7.41 (m, 3H), 7.41 – 7.34 (m, 3H), 7.34 – 7.30 (m, 2H), 7.29 – 7.26 (m, 2H), 7.26 – 7.23 (m, 2H), 7.20 – 7.12 (m, 4H), 7.07 – 6.89 (m, 2H), 6.87 – 6.82 (m, 2H), 6.78 (dd, *J* = 8.8, 1.1 Hz, 2H), 5.08 (s, 2H), 4.83 (s, 2H), 2.43 (d, *J* = 33.0 Hz, 6H).

**<sup>13</sup>C NMR (126 MHz, CDCl<sub>3</sub>)** δ 157.6, 156.3, 152.0, 147.9, 143.8, 143.5, 135.0, 134.9, 134.8, 129.9, 129.8, 129.4, 129.4, 129.3, 129.2, 129.1, 128.9, 128.2, 127.4, 126.9, 125.8, 122.3, 120.7, 114.6, 114.4, 70.4, 64.4, 21.2, 21.1.

**HRMS (ESI<sup>+</sup>), *m/z*:** calculated for C<sub>21</sub>H<sub>20</sub>N<sub>2</sub>O<sub>3</sub>S [M + H]<sup>+</sup>: 381.1627 found: 381.1646.

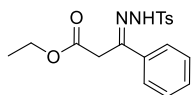

**Ethyl 3-phenyl-3-(2-tosylhydrazono)propanoate (53b):** Prepared according to the synthesis of *N*-tosylhydrazones, the title compound was prepared from tosylhydrazide (10.0 mmol) in MeOH (10.0 mL), ketone (1.0 equiv), *N*-tosylhydrazones **53b** was obtained after column chromatography (hexane: EtO Ac, 2:1) as a white solid (isolated yield: 79%).

**<sup>1</sup>H NMR (500 MHz, CDCl<sub>3</sub>)** δ 9.23 (s, 1H), 7.92 (d, *J* = 8.3 Hz, 2H), 7.76 – 7.65 (m, 2H), 7.38 – 7.34 (m, 3H), 7.33 – 7.28 (m, 2H), 4.15 (q, *J* = 7.2 Hz, 2H), 3.78 (s, 2H), 2.40 (s, 3H), 1.23 (t, *J* = 7.1 Hz, 3H).

**<sup>13</sup>C NMR (126 MHz, CDCl<sub>3</sub>)** δ 168.6, 148.3, 143.6, 135.5, 135.1, 129.6, 129.1, 128.1, 127.7, 125.9, 62.0, 34.8, 21.1, 13.5.

**HRMS (ESI<sup>+</sup>), *m/z*:** calculated for C<sub>18</sub>H<sub>20</sub>N<sub>2</sub>O<sub>4</sub>S [M + H]<sup>+</sup>: 361.1217, found: 361.1214.

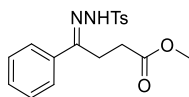

**Methyl 4-phenyl-4-(2-tosylhydrazono)butanoate (54b):** Prepared according to the synthesis of *N*-tosylhydrazones, the title compound was prepared from tosylhydrazide (10.0 mmol) in MeOH (10.0 mL), ketone (1.0 equiv), *N*-tosylhydrazones **54b** was obtained after column chromatography (hexane: EtO Ac, 2:1) as a white solid (isolated yield: 71%).

**<sup>1</sup>H NMR (500 MHz, CDCl<sub>3</sub>)** δ 9.72 (s, 1H), 7.94 (d, *J* = 8.3 Hz, 2H), 7.54 (dd, *J* = 8.1, 1.7 Hz, 2H), 7.36 – 7.29 (m, 5H), 3.60 (s, 3H), 3.00 – 2.90 (m, 2H), 2.65 – 2.58 (m, 2H), 2.41 (s, 3H).

**HRMS (ESI+), *m/z*:** calculated for C<sub>18</sub>H<sub>20</sub>N<sub>2</sub>O<sub>4</sub>S [M + H]<sup>+</sup>: 361.1217, found: 361.1234.

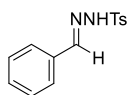

***N'*-benzylidene-4-methylbenzenesulfonohydrazide (55b)** Prepared according to the synthesis of *N*-tosylhydrazones, the title compound was prepared from tosylhydrazide (10.0 mmol) in MeOH (10.0 mL), ketone (1.0 equiv), *N*-tosylhydrazones **55b** was obtained as a white solid by recrystallization (isolated yield: 86%).

**<sup>1</sup>H NMR (500 MHz, CDCl<sub>3</sub>)** δ 8.61 (s, 1H), 7.90 (d, *J* = 8.3 Hz, 2H), 7.81 (s, 1H), 7.55 (dd, *J* = 7.7, 1.9 Hz, 2H), 7.37 – 7.27 (m, 5H), 2.38 (s, 3H).

**<sup>13</sup>C NMR (126 MHz, CDCl<sub>3</sub>)** δ 147.6, 143.8, 134.8, 132.8, 129.9, 129.3, 128.1, 127.5, 126.9, 21.1.

**HRMS (ESI+), *m/z*:** calculated for C<sub>14</sub>H<sub>14</sub>N<sub>2</sub>O<sub>2</sub>S [M+H]<sup>+</sup>: 275.0854, found: 275.0873.

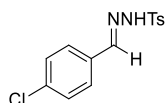

***N'*-(4-chlorobenzylidene)-4-methylbenzenesulfonohydrazide (56b):** Prepared according to the synthesis of *N*-tosylhydrazones, the title compound was prepared from tosylhydrazide (10.0 mmol) in MeOH (10.0 mL), ketone (1.0 equiv), *N*-tosylhydrazones **56b** was obtained as a white solid by recrystallization (isolated yield: 88%).

**<sup>1</sup>H NMR (500 MHz, CDCl<sub>3</sub>)** δ 7.86 (d, *J* = 8.4 Hz, 2H), 7.82 (s, 1H), 7.70 (s, 1H), 7.51 (d, *J* = 8.6 Hz, 2H), 7.33 (dd, *J* = 8.3, 5.1 Hz, 4H), 2.42 (s, 3H).

**HRMS (ESI+), *m/z*:** calculated for C<sub>14</sub>H<sub>13</sub>ClN<sub>2</sub>O<sub>2</sub>S [M + H]<sup>+</sup>: 309.0459, found: 309.0456.

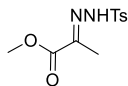

**Methyl -2-(2-tosylhydrazono)propanoate (57b):** Prepared according to the synthesis of *N*-tosylhydrazones, the title compound was prepared from tosylhydrazide (10.0 mmol) in MeOH (10.0 mL), ketone (1.0 equiv), *N*-tosylhydrazones **57b** was obtained after column chromatography (hexane: EtOAc, 3:1) as a white solid (isolated yield: 65%).

**<sup>1</sup>H NMR (500 MHz, CDCl<sub>3</sub>)** δ 7.95 (s, 1H), 7.88 (d, *J* = 8.4 Hz, 2H), 7.38 – 7.30 (m, 2H), 3.80 (s, 3H), 2.44 (s, 3H), 1.98 (s, 3H).

**HRMS (ESI+), *m/z*:** calculated for C<sub>11</sub>H<sub>14</sub>N<sub>2</sub>O<sub>4</sub>S [M + H]<sup>+</sup>: 271.0747, found: 271.0764.

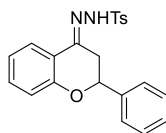

**4-Methyl-*N'*-(2-phenylchroman-4-ylidene)benzenesulfonohydrazide (88b):** Prepared according to the synthesis of *N*-tosylhydrazones, the title compound was prepared from tosylhydrazide (10.0 mmol) in MeOH (10.0 mL), ketone (1.0 equiv), *N*-tosylhydrazones **88b** was obtained after column chromatography (hexane: EtOAc, 2:1) as a yellow solid (isolated yield: 55%).

**<sup>1</sup>H NMR (500 MHz, CDCl<sub>3</sub>)** δ 7.99 – 7.71 (m, 3H), 7.49 (s, 1H), 7.45 – 7.34 (m, 5H), 7.32 (d, *J* = 8.1 Hz, 3H), 7.03 – 6.88 (m, 2H), 5.11 – 4.99 (m, 1H), 3.02 (dd, *J* = 16.5, 3.1 Hz, 1H), 2.59 (dd, *J* = 16.5, 12.4 Hz, 1H), 2.42 (s, 3H).

**HRMS (ESI+), *m/z*:** calculated for C<sub>22</sub>H<sub>20</sub>N<sub>2</sub>O<sub>3</sub>S [M + H]<sup>+</sup>: 393.1267, found: 393.1286.

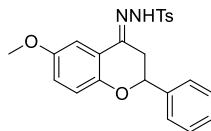

***N'*-(6-methoxy-2-phenylchroman-4-ylidene)-4-methylbenzenesulfonohydrazide (89b):** Prepared according to the synthesis of *N*-tosylhydrazones, the title compound was prepared from tosylhydrazide (10.0 mmol) in MeOH (10.0 mL), ketone (1.0 equiv), *N*-tosylhydrazones **89b** was obtained after column chromatography (hexane: EtO Ac, 2:1) as a yellow solid (isolated yield: 45%).

**<sup>1</sup>H NMR (500 MHz, CDCl<sub>3</sub>)** δ 7.91 (d, *J* = 8.4 Hz, 2H), 7.44 – 7.35 (m, 6H), 7.32 (d, *J* = 8.2 Hz, 3H), 6.92 – 6.84 (m, 2H), 5.06 – 4.97 (m, 1H), 3.82 (s, 3H), 2.96 (dd, *J* = 16.5, 3.1 Hz, 1H), 2.56 (dd, *J* = 16.5, 12.4 Hz, 1H), 2.43 (s, 3H).

**HRMS (ESI<sup>+</sup>), *m/z*:** calculated for C<sub>23</sub>H<sub>22</sub>N<sub>2</sub>O<sub>4</sub>S [M + H]<sup>+</sup>: 423.1373, found: 423.1393.

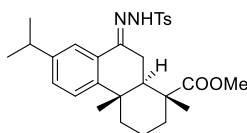

**(1*R*,4*aS*,10*aR*)-Methyl 7-isopropyl-1,4*a*-dimethyl-9-(2-tosylhydrazono)-1,2,3,4,4*a*,9,10,10*a*-octahydrophenanthrene-1-carboxylate (90b):** Prepared according to the synthesis of *N*-tosylhydrazones, the title compound was prepared from tosylhydrazide (10.0 mmol) in MeOH (10.0 mL), ketone (1.0 equiv), *N*-tosylhydrazones **90b** was obtained after column chromatography (hexane: EtOAc, 2:1) as a white solid (isolated yield: 65%).

**<sup>1</sup>H NMR (500 MHz, CDCl<sub>3</sub>)** δ 8.01 – 7.90 (m, 2H), 7.86 (d, *J* = 7.8 Hz, 1H), 7.71 (d, *J* = 2.0 Hz, 1H), 7.33 (d, *J* = 8.0 Hz, 2H), 7.19 – 7.11 (m, 2H), 3.63 (s, 3H), 2.92 – 2.84 (m, 1H), 2.42 (s, 3H), 2.36 – 2.24 (m, 3H), 1.72 (dt, *J* = 8.6, 2.6 Hz, 4H), 1.33 (s, 3H), 1.24 (s, 6H), 1.03 (s, 3H), 0.93 – 0.90 (m, 2H).

**HRMS (ESI<sup>+</sup>), *m/z*:** calculated for C<sub>28</sub>H<sub>36</sub>N<sub>2</sub>O<sub>4</sub>S [M + H]<sup>+</sup>: 497.2469, found: 497.2489.



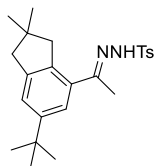

***N'*-(1-(6-(tert-butyl)-2,2-dimethyl-2,3-dihydro-1*H*-inden-4-yl)ethylidene)-4-**

**methylbenzenesulfonohydrazide (91b):** Prepared according to the synthesis of *N*-tosylhydrazones, the title compound was prepared from tosylhydrazide (10.0 mmol) in MeOH (10.0 mL), ketone (1.0 equiv), *N*-tosylhydrazones **91b** was obtained after column chromatography (hexane: EtOAc, 3:1) as a white solid (isolated yield: 55%).

**<sup>1</sup>H NMR (500 MHz, CDCl<sub>3</sub>)** δ 7.92 (d, *J* = 8.3 Hz, 2H), 7.37 – 7.28 (m, 2H), 7.13 (d, *J* = 1.4 Hz, 2H), 2.80 (t, *J* = 7.2 Hz, 2H), 2.43 (s, 3H), 2.18 (s, 3H), 1.82 (t, *J* = 7.2 Hz, 2H), 1.26 (d, *J* = 32.4 Hz, 15H).

**<sup>13</sup>C NMR (126 MHz, CDCl<sub>3</sub>)** δ 154.3, 153.1, 149.1, 143.6, 138.0, 135.1, 133.3, 129.1, 127.9, 122.2, 119.3, 43.2, 41.0, 34.2, 31.0, 30.0, 28.2, 21.1, 15.1.

**HRMS (ESI<sup>+</sup>), *m/z*:** calculated for C<sub>24</sub>H<sub>32</sub>N<sub>2</sub>O<sub>2</sub>S [M + H]<sup>+</sup>: 413.2257, found: 413.2286.

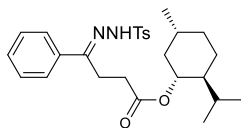

**(1*R*,2*S*,5*R*)-2-Isopropyl-5-methylcyclohexyl 4-phenyl-4-(2-tosylhydrazono)butanoate (92b):**

Prepared according to the synthesis of *N*-tosylhydrazones, the title compound was prepared from tosylhydrazide (10.0 mmol) in MeOH (10.0 mL), ketone (1.0 equiv), *N*-tosylhydrazones **92b** was obtained after column chromatography (hexane: EtOAc, 3:1) as a white solid (isolated yield: 88%).

**<sup>1</sup>H NMR (500 MHz, CDCl<sub>3</sub>)** δ 9.93 (s, 1H), 7.93 (d, *J* = 8.1 Hz, 2H), 7.55 – 7.50 (m, 2H), 7.33 (dd, *J* = 9.6, 7.1 Hz, 3H), 7.29 – 7.26 (m, 2H), 4.57 (td, *J* = 10.9, 4.4 Hz, 1H), 2.93 (dt, *J* = 8.1, 5.8 Hz, 2H), 2.57 (t, *J* = 6.1 Hz, 2H), 2.40 (s, 3H), 1.81 (s, 1H), 1.66 (ddd, *J* = 13.3, 6.7, 3.1 Hz, 2H), 1.52 – 1.46 (m, 1H), 1.28 – 1.24 (m, 1H), 1.00 (dd, *J* = 12.8, 3.5 Hz, 1H), 0.91 (d, *J* = 6.4 Hz, 3H), 0.89 – 0.84 (m, 2H), 0.76 (d, *J* = 7.0 Hz, 3H), 0.54 (d, *J* = 6.9 Hz, 3H).

**<sup>13</sup>C NMR (126 MHz, CDCl<sub>3</sub>)** δ 173.5, 154.4, 143.0, 135.3, 134.9, 132.7, 129.6, 129.5, 129.3, 128.8, 128.1, 128.0, 127.9, 127.8, 127.6, 127.5, 126.3, 125.9, 75.5, 74.1, 46.5, 46.3, 40.4, 40.2, 33.8, 33.6, 33.0, 31.0, 30.9, 28.2, 25.8, 23.0, 21.5, 21.1, 20.8, 20.3, 15.9, 15.7.

**HRMS (ESI<sup>+</sup>), *m/z*:** calculated for C<sub>27</sub>H<sub>36</sub>N<sub>2</sub>O<sub>4</sub>S [M + H]<sup>+</sup>: 485.2469, found: 485.2472.

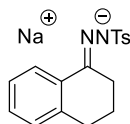

***N'*-(3,4-Dihydronaphthalen-1(2*H*)-ylidene)-4-methylbenzenesulfonohydrazide sodium (1e) :**

Prepared according to the synthesis of *N*-tosylhydrazone sodium salt. Following the workup, the product was purified ,give the title compound as a white solid (99% yield).

**<sup>1</sup>H NMR (500 MHz, DMSO-*d*<sub>6</sub>)** δ 7.82 (d, *J* = 8.3 Hz, 2H), 7.77 (dd, *J* = 7.9, 1.4 Hz, 1H), 7.41 (d, *J* = 8.1 Hz, 2H), 7.25 (td, *J* = 7.5, 1.5 Hz, 1H), 7.21 – 7.13 (m, 2H), 2.68 (t, *J* = 6.0 Hz, 2H), 2.54 (t, *J* = 6.6 Hz, 2H), 2.37 (s, 3H), 1.76 (p, *J* = 6.3 Hz, 2H).

**HRMS (ESI+), *m/z*:** calculated for [C<sub>17</sub>H<sub>18</sub>N<sub>2</sub>O<sub>2</sub>SN<sup>++</sup>]: 337.0981, found: 337.0993.

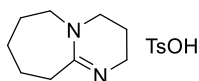

**2,3,4,6,7,8,9,10-octahydropyrimido[1,2-*a*]azepine 4-methylbenzenesulfonate (101e):**

Prepared according to the synthesis of ammonium salts of DBU. Following the workup, the product was purified ,give the title compound as a white solid (99% yield).

**<sup>1</sup>H NMR (500 MHz, DMSO-*d*<sub>6</sub>)** δ 9.53 (s, 1H), 7.52 – 7.47 (m, 2H), 7.13 (d, *J* = 7.6 Hz, 2H), 3.55 – 3.50 (m, 4H), 3.23 (d, *J* = 2.7 Hz, 2H), 2.64 (d, *J* = 10.8 Hz, 2H), 2.30 (s, 3H), 1.90 (s, 2H), 1.73 – 1.42 (m, 6H).

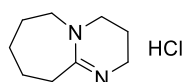

**2,3,4,6,7,8,9,10-octahydropyrimido[1,2-*a*]azepine hydrochloride (101f):** Prepared according to the synthesis of ammonium salts of DBU. Following the workup, the product was purified ,give the title compound as a white solid (99% yield).

**<sup>1</sup>H NMR (500 MHz, DMSO-*d*<sub>6</sub>)** δ 10.31 (s, 1H), 3.55 (d, *J* = 9.5 Hz, 2H), 3.47 (t, *J* = 5.9 Hz, 2H), 3.26 – 3.19 (m, 2H), 2.75 (d, *J* = 10.5 Hz, 2H), 1.90 (p, *J* = 5.8 Hz, 2H), 1.73 – 1.50 (m, 6H).

## 6. The applications of the visible-light-induced [3+2] cycloadditions

### Synthesis of **11d** in gram scale:

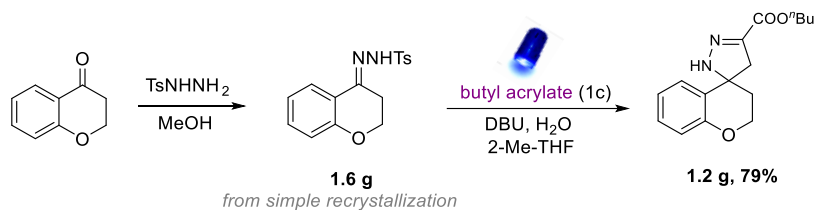

Following the general procedure A, the reaction with **11b** (1.6 g, 5.0 mmol), butyl acrylate (1.1 mL, 7.5 mmol, 1.5 equiv), DBU (2.2 mL, 15.0 mmol, 3 equiv),  $\text{H}_2\text{O}$  (275  $\mu\text{L}$ , 15.0 mmol, 3.0 equiv) and 2-MeTHF (15 mL) under Ar for 40 h at room temperature afforded **11d** as yellow oil (1.2 g, 79% yield).

### Synthesis of **87d** in gram scale:

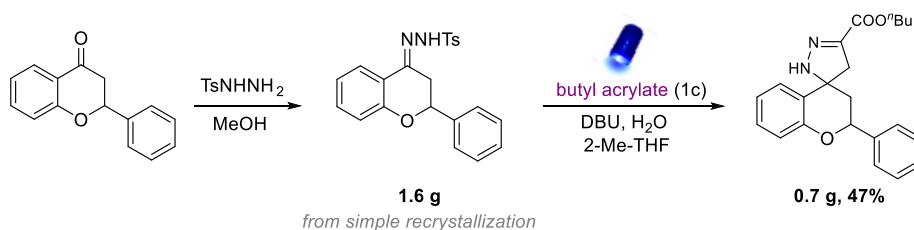

Following the general procedure A, the reaction with **87b** (1.57 g, 4.0 mmol), butyl acrylate (880  $\mu\text{L}$ , 6 mmol, 1.5 equiv), DBU (1.8 mL, 12.0 mmol, 3 equiv),  $\text{H}_2\text{O}$  (220  $\mu\text{L}$ , 12.0 mmol, 3 equiv) and 2-MeTHF (15 mL) under Ar for 40 h at room temperature afforded **87d** as yellow oil (680 mg, 47% yield).

### One-pot approach

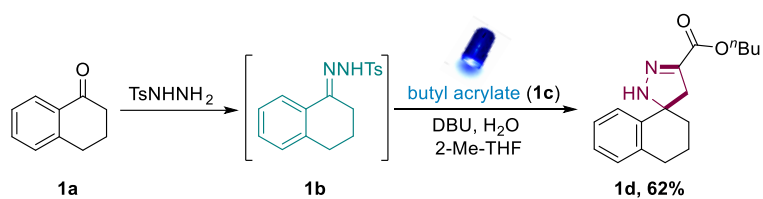

A dry 5 mL Schlenk tube containing a stirring bar was charged with 0.2 mmol of ketone **1a** (1.0 equiv), 0.2 mmol of  $\text{TsNHNH}_2$  (1.0 equiv). After purging the flask for three times under vacuum and three times under argon, it was charged with anhydrous 2-MeTHF (1.0 mL). The reaction was kept for 1.5 h under 60 °C. Afterwards, 0.3 mmol butyl acrylate **1c** (1.5 equiv), 0.6 mmol DBU (3.0 equiv) and 0.6 mmol  $\text{H}_2\text{O}$  (3 equiv) were added and the reaction was kept for 16 h under 40 W Kessil lamp reaction setup (the progress can be monitored *via* TLC). Then, the resulting mixture underwent an aqueous workup (using distilled water; or brine in case of slurry phase separation) and was extracted three times with dichloromethane. The combined organic layers were dried over anhydrous  $\text{Na}_2\text{SO}_4$ , filtered and concentrated *in vacuo*. Products were purified *via* flash column chromatography with ethyl acetate and hexane as solvents.

## 7. Mechanistic investigations

### Ultraviolet-Visible absorption experiments

Ultraviolet-visible absorption experiments were measured in a 1 cm quartz cuvette using a gilent Cary 100 spectrophotometer. Absorption spectra of individual reaction components and mixtures thereof were recorded. A bathochromic shift was observed for a mixture of **1b** and DBU in THF (0.2 M), which was a visibly intense yellow in color. This indicates the formation of a non-covalent complex (Figure S2). The concentration of each component was  $2 \times 10^{-4}$  M.

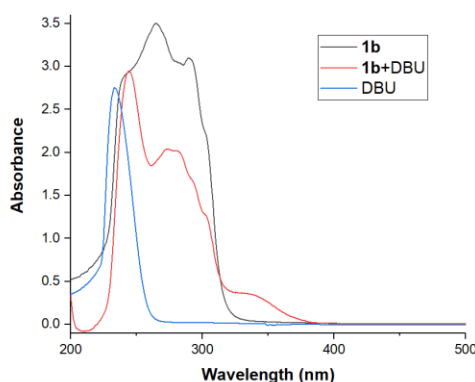

**Figure S2.** UV/vis absorption spectra of individual reaction components and a combination thereof. All spectra were measured in THF and with a concentration of 200  $\mu$ M **1b**, 200  $\mu$ M DBU.

Evaluated the reactivity of hydrazone anion (**1e**) and ammonium salts of DBU under the standard conditions. To further prove whether the non-covalent complex was formed from the hydrazone anion and different ammonium salts. We performed the UV-Vis spectra measurement and no red shift was observed in the mixture of two species.

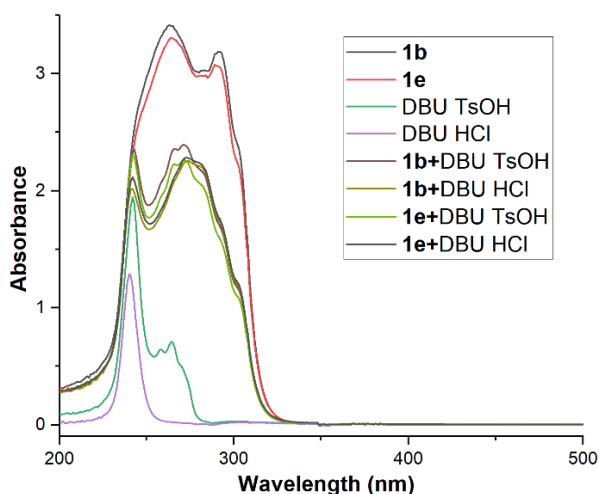

**Figure S3.** UV/vis absorption spectra of individual reaction components and a combination thereof.

### Job's plot experiments

The total concentration of *N*-tosylhydrazone anion (**1e**) and DBU was kept constant, and DBU/**1e** was prepared as 10/0, 9/1, 8/2, 7/3, 6/4, 5/5, 4/6, 3/7, 2/8, 1/9, 0/10. and the UV-absorption spectra were carried out sequentially. The Job's curve is made, and the intersection of the two curves after fitting is the complexation ratio between **1e** and DBU.

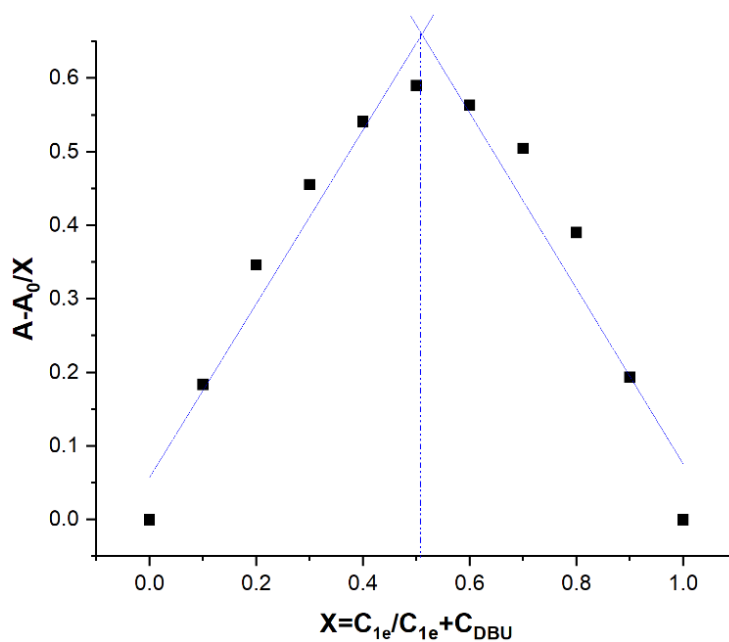

Figure S4. Job's curve UV/vis absorption spectra of different DBU/**1e** ratios.

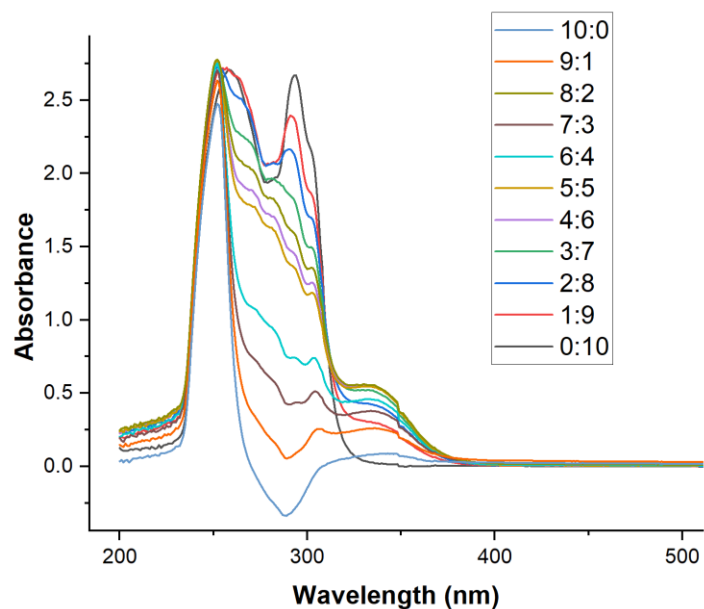

Figure S5. Job's curve UV/vis absorption spectra of different DBU/**1e** ratios.

### <sup>1</sup>H NMR titration experiments

*N*-tosylhydrazone **1b** (1 equiv, 2 mmol) and sodium ethoxide (1.5 equiv, 3 mmol) were added to the round bottom flask, 4 ml water was added, stirred overnight, and the corresponding *N*-tosylhydrazone anion **1e** were obtained by filtration. And then, solutions containing equal molar concentrations of **1e** (0.50 M in DMSO-*d*<sub>6</sub>) and DBU (0.50 M in DMSO-*d*<sub>6</sub>) were prepared and then mixed to cover acceptor/donor ratio from 0%, 10%, 20% to 100% donor (from 1 to 11 in Figure S6).

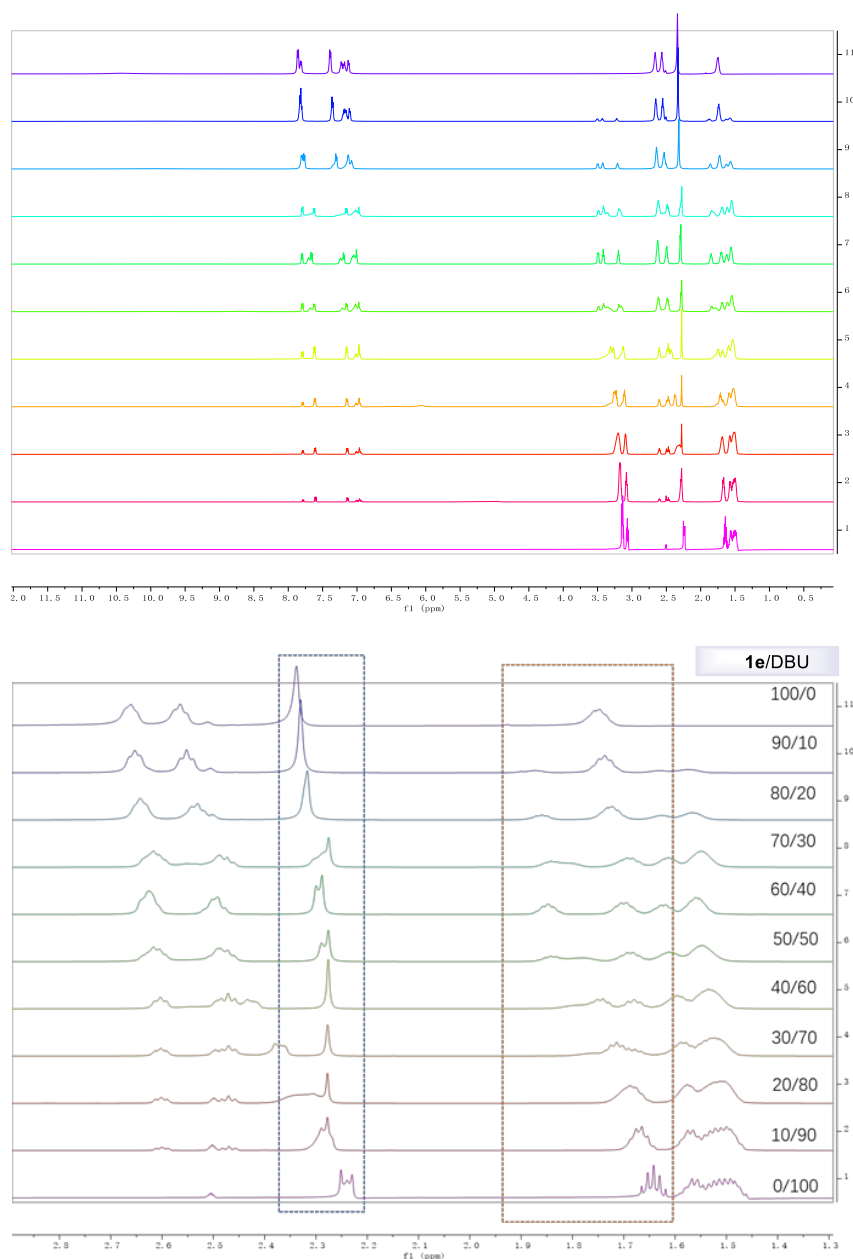

**Figure S6.** Titration of DBU into **1e**.

## On-off experiments

An NMR tube was charged with 0.2 mmol of *N*-tosylhydrazone (1.0 equiv), 0.3 mmol of alkene (1.5 equiv), 0.6 mmol of DBU (3.0 equiv), 0.6 mmol (3.0 equiv) of H<sub>2</sub>O. After purging the tube three times under vacuum and three times under argon, it was charged with tetrahydrofuran-*d*<sub>8</sub> (0.5 mL) and wrapped with parafilm carefully. Then the mixture was irradiated by 40 W 456 nm Kessil lamps reaction setup at room temperature. After 1 h, the Kessil lamps were turned off, and the NMR yield was measured immediately. Then the tube was reacted in the darkness for an additional 1 h and subsequently measure the NMR yield. Then the NMR tube was put e back to the Kessil lamps setup and irradiate 1 h and further measure the NMR yield once again. So repeatedly, we got the results underneath.

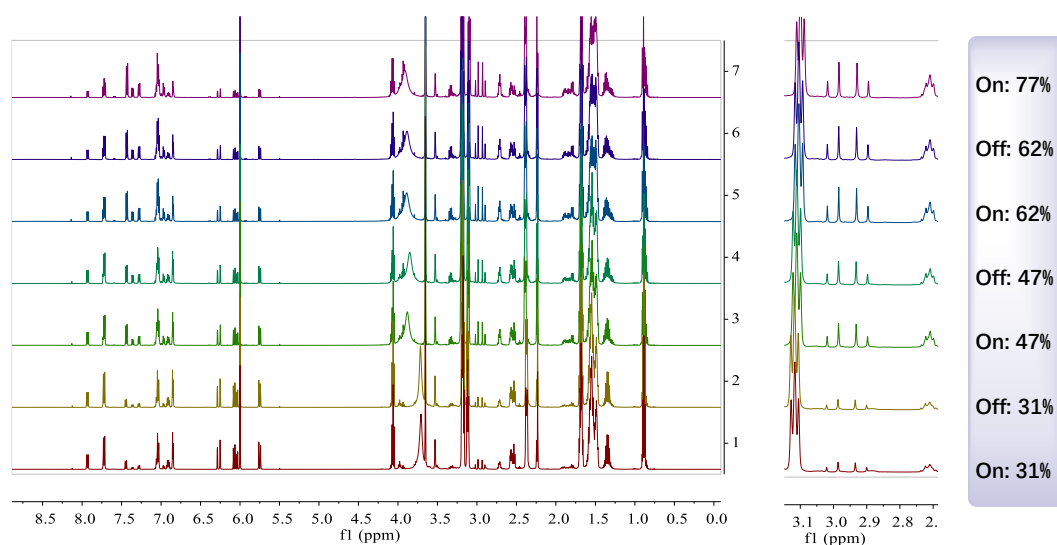

**Figure S7.** The comparison of On-off experiment yields determined by hydrogen spectrometry.



### Determination of sulfonyl anion

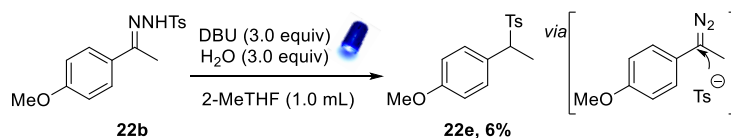

A dry 5 mL Schlenk tube containing a stirring bar was charged with 0.2 mmol of *N*-tosylhydrazone (1.0 equiv), 0.6 mmol of DBU (3.0 equiv), 0.6 mmol (3.0 equiv) of H<sub>2</sub>O. After purging the flask three times under vacuum and three times under argon, it was charged with 2-Methyltetrahydrofuran (1.0 mL). The reaction was kept for 5 h and 16 h under 40 W Kessil lamp reaction setup. Then, the resulting mixture underwent an aqueous workup (using distilled water) and was extracted three times with dichloromethane.<sup>[8]</sup> The combined organic layers were dried over anhydrous Na<sub>2</sub>SO<sub>4</sub>, filtered and concentrated *in vacuo*. Then the product was purified by column chromatography and determined by NMR and HR-MS.

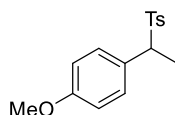

**1-methoxy-4-(1-tosylethyl)benzene (22e):** Prepared according to the general procedure. Following the workup, the product was purified by column chromatography (hexane: EtOAc, 10:1) to give the title compound as a colorless oil (6% yield).

**<sup>1</sup>H NMR (500 MHz, CDCl<sub>3</sub>)**  $\delta$  7.45 (d, *J* = 8.3 Hz, 2H), 7.22 (dt, *J* = 7.9, 0.7 Hz, 2H), 7.11 – 7.06 (m, 2H), 6.83 – 6.78 (m, 2H), 4.19 (q, *J* = 7.2 Hz, 1H), 3.81 (s, 3H), 2.42 (s, 3H), 1.73 (d, *J* = 7.2 Hz, 3H).

**HRMS (ESI<sup>+</sup>), *m/z*:** calculated for [C<sub>16</sub>H<sub>18</sub>O<sub>3</sub>SN<sup>+</sup>]: 313.0869, found: 313.0874.

### Carbene trapping experiment

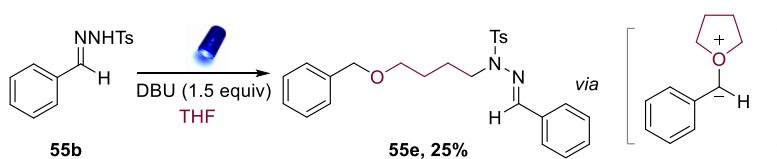

A dry 5 mL Schlenk tube containing a stirring bar was charged with 0.2 mmol of *N*-tosylhydrazide (1.0 equiv), 0.3 mmol of DBU (1.5 equiv). After purging the flask three times under vacuum and three times under argon, it was charged with Tetrahydrofuran (1.0 mL). The reaction was kept for 16 h under 40 W Kessil lamp reaction setup (the progress can be monitored *via* TLC). Then, the resulting mixture underwent an aqueous workup (using distilled water) and was extracted three times with dichloromethane. The combined organic layers were dried over anhydrous Na<sub>2</sub>SO<sub>4</sub>, filtered and concentrated *in vacuo*. Then the product was purified by column chromatography and determined by NMR and HR-MS.

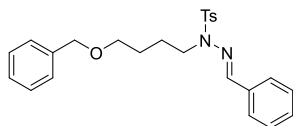

**N'-(5-(Benzyloxy)-1-phenylpentylidene)-4-methylbenzenesulfonohydrazide (55e):** Prepared according to the general procedure. Following the workup, the product was purified by column chromatography (hexane: EtOAc, 3:1) to give the title compound as a colorless oil (25% yield).

**<sup>1</sup>H NMR (500 MHz, CDCl<sub>3</sub>)**  $\delta$  7.97 (s, 1 H), 7.74 (m, 2 H), 7.61 (dt, *J*=8.6, 3.9 Hz, 2 H), 7.39–7.36 (m, 3 H), 7.32 (d, *J*=4.0 Hz, 4 H), 7.28 (d, *J*=8.0 Hz, 3 H), 4.49 (s, 2 H), 3.59 (t, *J*=6.7 Hz, 2 H), 3.52 (t, *J*=5.6 Hz, 2 H), 2.40 (s, 3 H), 1.74–1.70 (m, 4 H);

**<sup>13</sup>C NMR (126 MHz, CDCl<sub>3</sub>)**  $\delta$  151.6, 145.3, 139.9, 135.8, 135.4, 131.8, 130.9, 130.1, 129.8, 129.6, 129.1, 129.1, 129.0, 74.4, 71.0, 49.8, 28.3, 26.0, 23.0.

**HRMS (ESI<sup>+</sup>), *m/z*:** calculated for [C<sub>25</sub>H<sub>28</sub>N<sub>2</sub>O<sub>3</sub>S]: 436.1821, found: 436.1819.

## Control experiments

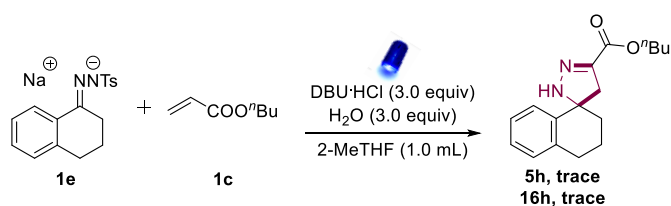

A dry 5 mL Schlenk tube containing a stirring bar was charged with 0.2 mmol of *N*-tosylhydrazone anion (1.0 equiv), 0.3 mmol of alkene (1.5 equiv), 0.6 mmol of DBU·HCl (3.0 equiv), 0.6 mmol (3.0 equiv) of H<sub>2</sub>O. After purging the flask three times under vacuum and three times under argon, it was charged with 2-Methyltetrahydrofuran (1.0 mL). The reaction was kept for 5 h and 16 h under 40 W Kessil lamp reaction setup. Then, the resulting mixture underwent an aqueous workup (using distilled water; or brine in case of slurry phase separation) and was extracted three times with dichloromethane. The combined organic layers were dried over anhydrous Na<sub>2</sub>SO<sub>4</sub>, filtered and concentrated *in vacuo*. The crude sample was further analysed *via* <sup>1</sup>H NMR and trace amount of product was detected.

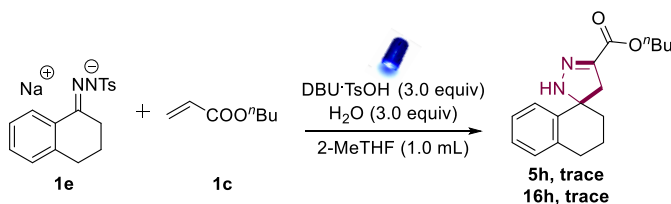

A dry 5 mL Schlenk tube containing a stirring bar was charged with 0.2 mmol of *N*-tosylhydrazone anion (1.0 equiv), 0.3 mmol of alkene (1.5 equiv), 0.6 mmol of DBU·TsOH (3.0 equiv), 0.6 mmol (3.0 equiv) of H<sub>2</sub>O. After purging the flask three times under vacuum and three times under argon, it was charged with 2-Methyltetrahydrofuran (1.0 mL). The reaction was kept for 5h and 16 h under 40 W Kessil lamp reaction setup, respectively. Then, the resulting mixture underwent an aqueous workup (using distilled water; or brine in case of slurry phase separation) and was extracted three times with dichloromethane. The combined organic layers were dried over anhydrous Na<sub>2</sub>SO<sub>4</sub>, filtered and concentrated *in vacuo*. The crude sample was further analysed *via* <sup>1</sup>H NMR and trace amount of product was detected.

### The regioselectivity of the [3+2]-cycloaddition

To determine the regioselectivity, we analyzed the crude sample under the standard conditions *via* NMR.

From the  $^1\text{H}$  NMR, assignment **1f** is not observed and 90% **1d** was identified.

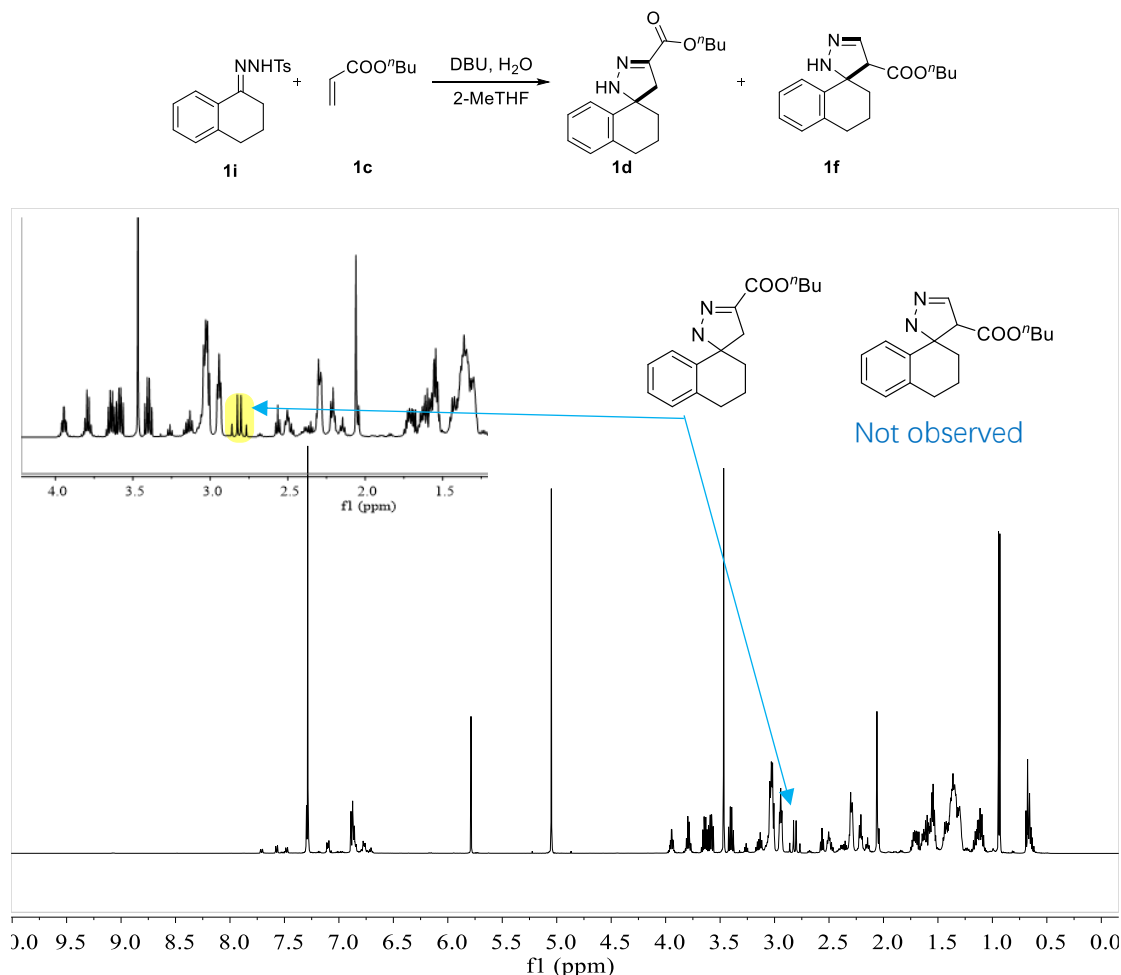

The regioselectivity for the [3+2]-cycloaddition has been reported in the literature reports.<sup>[9-10]</sup> The donor/donor diazo compounds serve as 1,3-dipoles and alkenes serve as dipolarophiles. Since the alkenes in our systems have electron-deficient groups, the electron-deficient dipolarophiles generally facilitate the [3+2]-cycloaddition to form the **1d** selectively according to calculating frontier molecular orbitals of 1, 3 dipoles and dipolarophiles.<sup>[5,11]</sup> We also give the proposed mechanism for the [3+2] cycloaddition as shown in below:

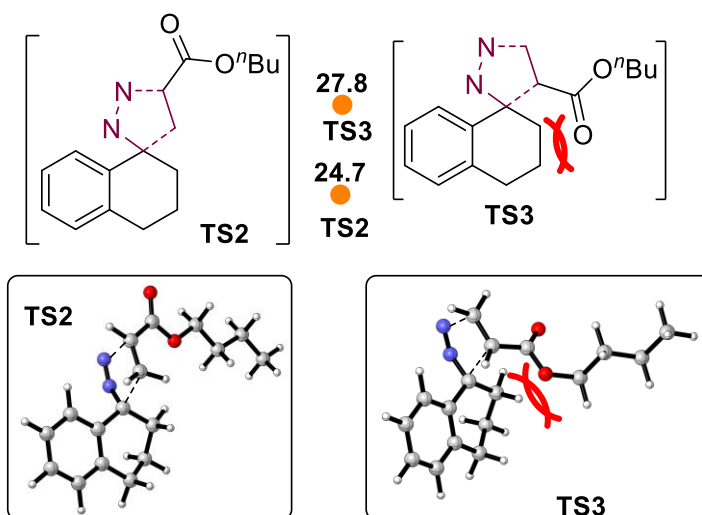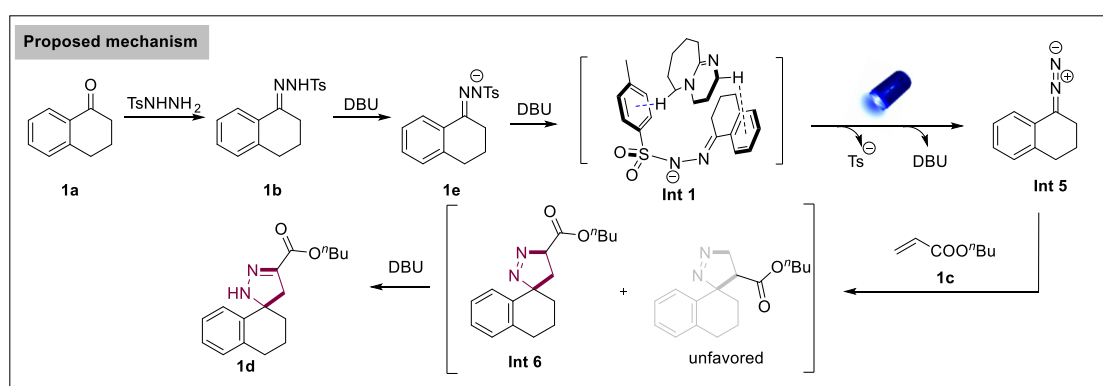

## Determination of light intensity

### Determination of the light intensity at 456 nm:

Standard ferrioxalate actinometry was used to determine the photon flux of the 40 W 456 nm Kessil lamp.<sup>[12-13]</sup> A 0.15 M solution of ferrioxalate was prepared by dissolving potassium ferrioxalate trihydrate (646.5 mg, 1.5 mmol) in 0.20 M aqueous H<sub>2</sub>SO<sub>4</sub> (10.0 mL). A buffered solution of 1,10-phenanthroline (0.15 M) was prepared by dissolving NaOAc (1.23 g, 15.0 mmol) and 1,10-phenanthroline (540.6 mg, 3.0 mmol) in 0.2 M aqueous H<sub>2</sub>SO<sub>4</sub> (20 mL). To a 10 mL Schlenk tube was added the ferrioxalate solution (1.0 mL) and the tube was sealed and irradiated with a Kessil Lamp (40 W 456 nm) for 300 s while maintaining the temperature at room temperature through cooling with a fan. The aqueous sulfuric acid (3.0 mL) and buffered solution (4.0 mL) were added immediately. The resulting mixture was then placed in the dark for 1 h to allow the formed ferrous ions to react completely with the 1,10-phenanthroline. An aliquot (25 µL) of the resulting solution was diluted with 0.20 M aqueous sulfuric acid (3.0 mL), the solution was transferred to a cuvette (*l* = 1.0 cm) and the absorbance at a wavelength of 510 nm was measured by UV-Vis spectrometry. The above procedure was repeated three times, and the average absorption was used for the calculation of the photon flux. A nonirradiated sample was also prepared and the absorbance at 510 nm was measured. The photon flux was calculated as follows:

$$\text{mol Fe}^{2+} = \frac{V \times \Delta A (510 \text{ nm})}{l \times \varepsilon} \quad (1)$$

where *V* is the total volume (0.00325 L) of the solution that was analyzed,  $\Delta A$  (0.48201) is the difference between the average absorption of irradiated and non-irradiated solutions at 510 nm, *l* is the path length (1.00 cm), and  $\varepsilon$  is the molar absorptivity of the ferrioxalate actinometer at 510 nm (11,100 L·mol<sup>-1</sup>·cm<sup>-1</sup>)<sup>[14]</sup>.

The photon flux was calculated as follows:

$$\text{photon flux} = \frac{\text{mol Fe}^{2+}}{\phi \times t \times f} \quad (2)$$

where  $\Phi$  is the quantum yield for the ferrioxalate actinometer (approximated as 0.965, which was the average value from the reported at  $\lambda = 436 \text{ nm}$  and  $\lambda = 468 \text{ nm}$ ), *t* is the irradiation time (300 s), and *f* is the fraction of light absorbed at  $\lambda = 456 \text{ nm}$  by the ferrioxalate actinometer. This value was calculated using the following equation where *A* (456 nm) is the absorption of the ferrioxalate solution at 456 nm.

$$f = 1 - 10^{-A(456\text{nm})} = 0.62284 \quad (3)$$

The average photon flux was thus calculated to be  $7.8 \times 10^{-8}$  einstein  $\text{s}^{-1}$ .

Sample calculation:

$$\text{mol Fe}^{2+} = \frac{V \times \Delta A (510 \text{ nm})}{l \times \varepsilon} = \frac{0.00325 \text{ L} \times 0.48201}{1.0 \text{ cm} \times 11100 \text{ L mol}^{-1} \text{cm}^{-1}} = 1.4 \times 10^{-7}$$

$$\text{photon flux} = \frac{\text{mol Fe}^{2+}}{\phi \times t \times f} = \frac{1.4 \times 10^{-7}}{0.965 \times 300 \text{ s} \times 0.62284} = 7.8 \times 10^{-10} \text{ einstein s}^{-1}$$

#### Determination of quantum yield:

A dry 5 mL Schlenk tube containing a stirring bar was charged with 0.2 mmol of *N*-tosylhydrazone (1.0 equiv), 0.3 mmol of alkene (1.5 equiv), 0.6 mmol of DBU (3.0 equiv) and 0.6 mmol (3.0 equiv) of  $\text{H}_2\text{O}$ . After purging the flask for three times under vacuum and three times under argon, it was charged with 2-Methyltetrahydrofuran (1.0 mL). The sample was stirred and irradiated ( $\lambda = 456 \text{ nm}$ , slit width = 10.0 nm) for 3600 s (60 min). Then, the resulting mixture underwent an aqueous workup (using distilled water; or brine in case of slurry phase separation) and was extracted three times with dichloromethane. The combined organic layers were dried over anhydrous  $\text{Na}_2\text{SO}_4$ , filtered and concentrated *in vacuo*. Products were purified *via* flash column chromatography with ethyl acetate and hexane as solvents. The yield of product formed was determined by  $^1\text{H}$  NMR based on a 1,3,5-trimethoxybenzene standard.

The quantum yield was determined using eq 4.

$$\phi = \frac{\text{mol product}}{\text{flux} \times t \times f} \quad (4)$$

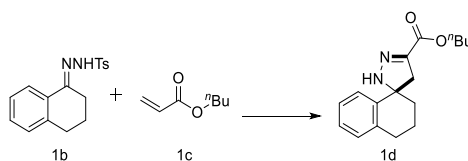

Experiment 1: 62.8 mg (0.2 mmol) *N*-tosylhydrazone, 44  $\mu\text{L}$  (0.3 mmol) alkene, 90  $\mu\text{L}$  (0.6 mmol) DBU, 11  $\mu\text{L}$  (0.6 mmol)  $\text{H}_2\text{O}$ , 1.0 mL 2-MeTHF after 3600 s yielded 31% of **1d**.  $\Phi(31\%) = 53.6$ .

Sample quantum yield calculation:

$$\phi = \frac{0.2 \times 10^{-3} \text{ mol} \times 0.31}{7.8 \times 10^{-10} \text{ einstein s}^{-1} \times 3600 \text{ s} \times 0.41156} = 53.6$$

## 8. DFT calculation

### Computational studies computational details:

All calculations were performed using Gaussian 16, Revision A.03 package.<sup>[15]</sup> All of the reactants, intermediates, transition states, products were optimized by the DFT with the M06-2X functional.<sup>[16]</sup> For geometry optimizations and frequency calculations, BS-I basis set system was employed. In BS-I, we employed def2-SVP basis sets<sup>[17]</sup> for all atoms. All the stationary structures were characterized with no imaginary frequency and the transition state structures (TSs) were characterized with a single imaginary frequency. Intrinsic reaction coordinate (IRC) calculations were performed on the TSs. The solvent effect of Tetrahydrofuran was evaluated through the SMD method<sup>[18]</sup>, in which a better basis system BS-II was used. In BSII, we employed def2-TZVP basis sets<sup>[19]</sup> for all atoms. All reported energies are free energies at a concentration of 1 M and a temperature of 298.15 K.



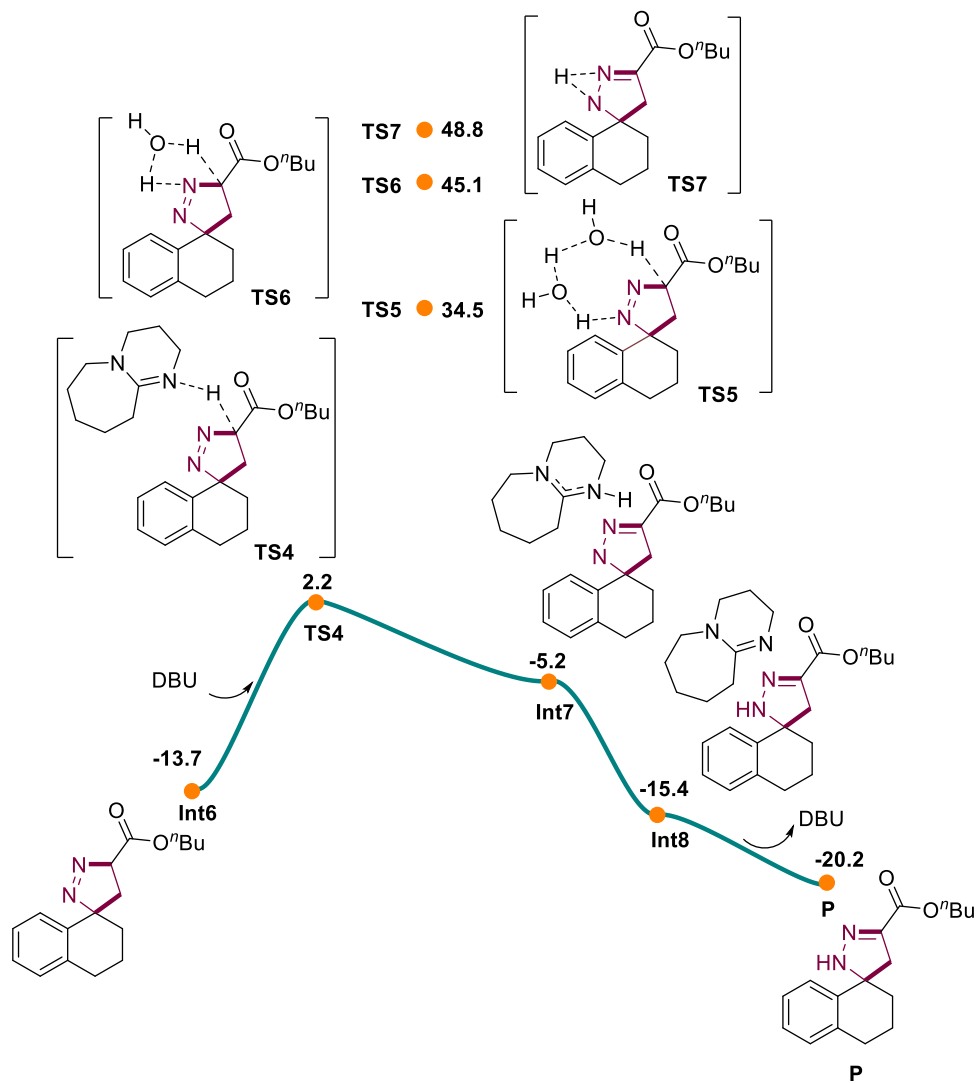

**Figure S8.** DFT calculated other transition states for the H-transfer process.

**Cartesian coordinates of the optimized structures:****Int1**

E = -1776.508374 a.u.

-1 1

|   |              |             |            |
|---|--------------|-------------|------------|
| C | -12.96598000 | 10.37372900 | 7.94251200 |
| C | -11.63214400 | 10.45047000 | 7.55860200 |
| C | -11.12774900 | 11.59906400 | 6.92040800 |
| C | -12.00246100 | 12.68079000 | 6.67817400 |
| C | -13.33672300 | 12.59385700 | 7.08371300 |
| C | -13.82983100 | 11.44806500 | 7.70778000 |
| H | -13.33639600 | 9.47268600  | 8.43625200 |
| H | -10.93897700 | 9.62766800  | 7.73912400 |
| C | -9.72798100  | 11.67826300 | 6.47683500 |
| C | -11.45651200 | 13.89835700 | 5.97426900 |
| H | -14.00097500 | 13.44271100 | 6.89799100 |
| H | -14.87582900 | 11.39673000 | 8.01574800 |
| C | -10.03179100 | 14.19043800 | 6.45163800 |
| C | -9.10686300  | 13.01344100 | 6.14491800 |
| H | -11.44499900 | 13.71146900 | 4.88355100 |
| H | -9.64698300  | 15.10955800 | 5.98410600 |
| H | -8.15015300  | 13.09132800 | 6.68671200 |
| H | -8.81735000  | 13.01092900 | 5.07971600 |
| H | -10.06165700 | 14.37016500 | 7.53942100 |
| H | -12.12273900 | 14.75894000 | 6.13983000 |
| N | -9.07286200  | 10.56734300 | 6.34772700 |
| N | -7.83353000  | 10.64309400 | 5.87234600 |
| S | -7.17514400  | 9.14555000  | 5.78986000 |
| O | -7.23538000  | 8.40985300  | 7.05497300 |
| O | -5.88679500  | 9.28498100  | 5.11434700 |
| C | -8.23331500  | 8.20644200  | 4.66747600 |
| C | -9.35167500  | 7.53864300  | 5.16375000 |
| C | -7.93047800  | 8.16708000  | 3.30953000 |
| C | -10.17708600 | 6.84054400  | 4.28508800 |
| H | -9.54494400  | 7.56965600  | 6.23670800 |
| C | -8.75968700  | 7.45723200  | 2.44097100 |
| H | -7.03504600  | 8.68513300  | 2.95972500 |
| C | -9.89713600  | 6.79214600  | 2.91321700 |
| H | -11.05756500 | 6.31892500  | 4.66973800 |
| H | -8.52054500  | 7.41784700  | 1.37464600 |
| C | -10.82715900 | 6.08253300  | 1.96313500 |
| H | -10.29624500 | 5.73933600  | 1.06439000 |
| H | -11.29977200 | 5.21251300  | 2.44012000 |
| H | -11.63444600 | 6.75711300  | 1.63387800 |
| C | -12.64544100 | 11.86860200 | 2.39693000 |

|   |              |             |             |
|---|--------------|-------------|-------------|
| N | -12.25861100 | 10.89688300 | 3.29035400  |
| C | -13.24090500 | 10.26409100 | 4.16564900  |
| C | -14.65999900 | 10.67440100 | 3.81700300  |
| C | -14.65621400 | 12.17162300 | 3.52719500  |
| N | -13.77540400 | 12.48467900 | 2.42662800  |
| H | -13.11823200 | 9.16874700  | 4.08100400  |
| H | -15.00932700 | 10.14329100 | 2.91655200  |
| H | -15.67022900 | 12.53226000 | 3.29371000  |
| H | -13.01523900 | 10.52729300 | 5.21202900  |
| H | -15.33109800 | 10.41446300 | 4.64919500  |
| H | -14.32933100 | 12.70186900 | 4.44351600  |
| C | -11.71971100 | 12.27706800 | 1.25726400  |
| H | -11.15563700 | 13.17172500 | 1.57131800  |
| H | -12.40858800 | 12.61794900 | 0.47488900  |
| C | -10.75441800 | 11.21449800 | 0.73498800  |
| H | -10.51541800 | 11.41989400 | -0.31998900 |
| H | -11.25715500 | 10.23311900 | 0.74999900  |
| C | -9.46879100  | 11.15327300 | 1.56074100  |
| H | -8.92229300  | 10.22307400 | 1.33620500  |
| H | -8.80382100  | 11.98592900 | 1.27790500  |
| C | -10.92192700 | 10.32925300 | 3.47262100  |
| H | -10.84528300 | 9.35043900  | 2.95899700  |
| H | -10.82421700 | 10.11522000 | 4.54823700  |
| C | -9.76395500  | 11.22335700 | 3.05731400  |
| H | -8.87693400  | 10.94400600 | 3.64721600  |
| H | -10.00753400 | 12.25603700 | 3.35563800  |

# **TS1**

E = -1776.471348 a.u.

-1 1

|   |              |             |            |
|---|--------------|-------------|------------|
| C | -12.51897100 | 10.36830700 | 8.06958700 |
| C | -11.31005900 | 10.58651500 | 7.42031100 |
| C | -11.06997000 | 11.79577800 | 6.72890800 |
| C | -12.08369300 | 12.78563000 | 6.71945200 |
| C | -13.28307500 | 12.54682500 | 7.39451800 |
| C | -13.52057900 | 11.34526800 | 8.06239000 |
| H | -12.67806900 | 9.42523700  | 8.59723100 |
| H | -10.51125300 | 9.83759800  | 7.44788200 |
| C | -9.81129800  | 12.04067900 | 6.04119700 |
| C | -11.84599400 | 14.08098000 | 5.97589000 |
| H | -14.04988400 | 13.32791400 | 7.39118700 |
| H | -14.46694800 | 11.17875800 | 8.58000500 |
| C | -10.37164500 | 14.48099300 | 6.01527600 |
| C | -9.52119000  | 13.37587800 | 5.39227100 |

|   |              |             |             |
|---|--------------|-------------|-------------|
| H | -12.14957100 | 13.96736800 | 4.91787500  |
| H | -10.21782500 | 15.43118900 | 5.48133300  |
| H | -8.44610500  | 13.59631000 | 5.49704600  |
| H | -9.72743200  | 13.35006800 | 4.30304500  |
| H | -10.06257400 | 14.63409600 | 7.06252000  |
| H | -12.48356800 | 14.87281800 | 6.40044700  |
| N | -8.90017100  | 11.09424800 | 6.01907900  |
| N | -7.81561900  | 10.80746300 | 5.63124000  |
| S | -7.54309700  | 8.72467400  | 6.34638200  |
| O | -8.58500700  | 8.51030000  | 7.39060900  |
| O | -6.17496500  | 8.19700200  | 6.57810700  |
| C | -8.17969000  | 7.81966300  | 4.90824700  |
| C | -9.50994500  | 7.40907500  | 4.88528800  |
| C | -7.37440300  | 7.68175700  | 3.78018900  |
| C | -10.03758200 | 6.86587900  | 3.71548600  |
| H | -10.10351700 | 7.52584400  | 5.79513500  |
| C | -7.91848500  | 7.15519900  | 2.60989300  |
| H | -6.32962800  | 7.99510300  | 3.83516900  |
| C | -9.25832000  | 6.74941400  | 2.55743300  |
| H | -11.08093300 | 6.53796600  | 3.69206600  |
| H | -7.29562700  | 7.05619200  | 1.71693700  |
| C | -9.86422600  | 6.21191000  | 1.28598800  |
| H | -10.33241400 | 5.22999000  | 1.45124600  |
| H | -10.64801500 | 6.88774200  | 0.90842500  |
| H | -9.10682200  | 6.10159400  | 0.49812900  |
| C | -12.53541600 | 12.08974600 | 2.75869700  |
| N | -12.41082000 | 10.94393700 | 3.50787400  |
| C | -13.50363400 | 10.51689300 | 4.37688400  |
| C | -14.79809400 | 11.23739200 | 4.04738400  |
| C | -14.49630700 | 12.72149800 | 3.88123000  |
| N | -13.48595300 | 12.95201700 | 2.87429700  |
| H | -13.62948500 | 9.42770000  | 4.24612700  |
| H | -15.21949400 | 10.85097400 | 3.10455800  |
| H | -15.40671500 | 13.27591600 | 3.60254000  |
| H | -13.22515200 | 10.68197600 | 5.43064100  |
| H | -15.53156400 | 11.05750500 | 4.84713900  |
| H | -14.16732500 | 13.12643500 | 4.85594500  |
| C | -11.53030200 | 12.37816900 | 1.65350200  |
| H | -10.64713600 | 12.88549200 | 2.07573800  |
| H | -12.04170700 | 13.11675300 | 1.02620200  |
| C | -11.09893400 | 11.15301400 | 0.84380000  |
| H | -10.86811100 | 11.45180100 | -0.19029500 |
| H | -11.95245100 | 10.45777800 | 0.77795200  |
| C | -9.89320400  | 10.44356200 | 1.46498100  |

|   |              |             |            |
|---|--------------|-------------|------------|
| H | -9.82644000  | 9.40783200  | 1.09124300 |
| H | -8.96270600  | 10.94550100 | 1.15339100 |
| C | -11.29919300 | 9.99620300  | 3.55254000 |
| H | -11.61032900 | 9.05112400  | 3.06076300 |
| H | -11.14992300 | 9.75219600  | 4.61934100 |
| C | -9.95835400  | 10.43400900 | 2.98867600 |
| H | -9.19443400  | 9.75224500  | 3.38862500 |
| H | -9.70726100  | 11.42077500 | 3.40283500 |

### <sup>3</sup>Int1

E = -1776.434043 a.u.

-1 3

|   |              |             |            |
|---|--------------|-------------|------------|
| C | -13.06703700 | 9.90365900  | 7.13595800 |
| C | -11.71137600 | 10.14838000 | 6.99752400 |
| C | -11.18947500 | 11.47178400 | 7.09621300 |
| C | -12.11383100 | 12.53927300 | 7.34868900 |
| C | -13.46594900 | 12.26146800 | 7.48336600 |
| C | -13.96381200 | 10.95327200 | 7.37768600 |
| H | -13.43915600 | 8.87956600  | 7.05234000 |
| H | -11.00850700 | 9.33726400  | 6.80862400 |
| C | -9.80391300  | 11.73499000 | 6.95185400 |
| C | -11.57940000 | 13.94827100 | 7.38912200 |
| H | -14.15650200 | 13.09073300 | 7.66359600 |
| H | -15.03171900 | 10.75926700 | 7.48971200 |
| C | -10.19041400 | 13.98829400 | 8.02607100 |
| C | -9.22837900  | 13.09113800 | 7.25334200 |
| H | -11.50138400 | 14.33441900 | 6.35564900 |
| H | -9.81033900  | 15.02070800 | 8.06089700 |
| H | -8.28236600  | 12.94626700 | 7.79903800 |
| H | -8.94070300  | 13.55193700 | 6.28840500 |
| H | -10.26640700 | 13.63266400 | 9.06703400 |
| H | -12.28543100 | 14.60432500 | 7.92127500 |
| N | -8.92175800  | 10.74396700 | 6.58410900 |
| N | -8.27331600  | 10.98523600 | 5.44443900 |
| S | -7.19598200  | 9.78120500  | 5.09943300 |
| O | -6.49935100  | 9.25217400  | 6.26907000 |
| O | -6.41671400  | 10.23467000 | 3.94614200 |
| C | -8.25531900  | 8.46219500  | 4.49477100 |
| C | -9.12086400  | 7.81312900  | 5.37791000 |
| C | -8.24435600  | 8.13790300  | 3.14337000 |
| C | -10.01118500 | 6.86645700  | 4.88127900 |
| H | -9.08432400  | 8.07379100  | 6.43720200 |
| C | -9.13154000  | 7.17422100  | 2.66166400 |
| H | -7.53979900  | 8.65648100  | 2.49035700 |

|   |              |             |             |
|---|--------------|-------------|-------------|
| C | -10.03601800 | 6.53791100  | 3.51739700  |
| H | -10.70268800 | 6.36591500  | 5.56449500  |
| H | -9.12706700  | 6.91749700  | 1.59890200  |
| C | -11.03191300 | 5.53577000  | 2.99265300  |
| H | -10.76049000 | 5.19474100  | 1.98443600  |
| H | -11.09610000 | 4.65595200  | 3.64913900  |
| H | -12.03892100 | 5.97797200  | 2.93674700  |
| C | -12.49045600 | 11.90974500 | 1.70094900  |
| N | -12.05150300 | 11.24919100 | 2.82310100  |
| C | -12.97263700 | 10.99086400 | 3.92553600  |
| C | -14.41183300 | 11.27278600 | 3.54121900  |
| C | -14.44124500 | 12.59533700 | 2.78438400  |
| N | -13.61153300 | 12.53695400 | 1.60327900  |
| H | -12.84723000 | 9.94013800  | 4.23784400  |
| H | -14.79734700 | 10.48024200 | 2.87913100  |
| H | -15.46857700 | 12.86148600 | 2.48907600  |
| H | -12.68652600 | 11.60089500 | 4.80034300  |
| H | -15.03056300 | 11.29204000 | 4.45037500  |
| H | -14.09170700 | 13.39835900 | 3.46401500  |
| C | -11.64252200 | 11.90709900 | 0.43707700  |
| H | -10.98540100 | 12.79302000 | 0.44563300  |
| H | -12.37144400 | 12.07803100 | -0.36388200 |
| C | -10.81331400 | 10.64814900 | 0.19109600  |
| H | -10.67561600 | 10.49834400 | -0.89112100 |
| H | -11.37665400 | 9.77227000  | 0.55395600  |
| C | -9.45358700  | 10.71373700 | 0.88612600  |
| H | -9.00793100  | 9.70704600  | 0.92162000  |
| H | -8.76363800  | 11.33977000 | 0.29633500  |
| C | -10.71794000 | 10.70945600 | 3.10476200  |
| H | -10.73420200 | 9.60419600  | 3.01056200  |
| H | -10.51441900 | 10.91762400 | 4.16886000  |
| C | -9.55944000  | 11.27894700 | 2.30153100  |
| H | -8.63653300  | 11.08099400 | 2.86702700  |
| H | -9.66101000  | 12.37607800 | 2.27728800  |

### <sup>3</sup>Int2

E = -1776.433431 a.u

-1 3

|   |             |             |            |
|---|-------------|-------------|------------|
| N | -0.23075300 | -1.21914700 | 1.91641900 |
| N | -1.43942300 | -1.27864800 | 2.36248100 |
| S | -2.66260900 | -0.78052300 | 1.20868100 |
| O | -3.06947700 | -1.95446300 | 0.43937300 |
| O | -3.66673100 | -0.03323200 | 1.96248500 |
| C | -1.81258300 | 0.32993200  | 0.11096400 |

|   |             |             |             |
|---|-------------|-------------|-------------|
| C | -1.83956300 | 1.69947300  | 0.36170000  |
| C | -0.94277900 | -0.21582800 | -0.83370500 |
| C | -0.95370600 | 2.52699500  | -0.32303200 |
| H | -2.53844600 | 2.08753600  | 1.10524500  |
| C | -0.04534900 | 0.62002200  | -1.48756500 |
| H | -0.95720200 | -1.29214400 | -1.01029900 |
| C | -0.01637700 | 1.99380400  | -1.21844100 |
| H | -0.95753400 | 3.60272000  | -0.12971300 |
| H | 0.68278900  | 0.19362900  | -2.18113900 |
| C | 1.05522800  | 2.85971200  | -1.82386200 |
| H | 0.78558500  | 3.92416100  | -1.78476500 |
| H | 1.99547900  | 2.72264400  | -1.26424400 |
| H | 1.25284800  | 2.58518000  | -2.86968000 |
| C | 0.64389300  | -0.20298300 | 2.02250700  |
| C | 1.86271900  | -0.23853500 | 1.29099200  |
| C | 0.31249200  | 0.95420900  | 2.93801100  |
| C | 2.12453200  | -1.25742200 | 0.32276700  |
| C | 2.86811500  | 0.76502700  | 1.48487500  |
| C | 1.15878800  | 2.18531100  | 2.62967000  |
| H | -0.76427100 | 1.17560400  | 2.85685100  |
| H | 0.47256900  | 0.65865600  | 3.99436700  |
| C | 3.29834400  | -1.25987100 | -0.41634700 |
| H | 1.36939800  | -2.03189700 | 0.17592600  |
| C | 4.02364400  | 0.74237800  | 0.71886400  |
| C | 2.63675700  | 1.80347700  | 2.55421700  |
| H | 0.99723400  | 2.95679200  | 3.39837400  |
| H | 0.84338500  | 2.60739000  | 1.66169800  |
| C | 4.26639500  | -0.26358700 | -0.23709000 |
| H | 3.46702100  | -2.05415600 | -1.14874800 |
| H | 4.77049000  | 1.52674400  | 0.88056000  |
| H | 2.94464000  | 1.39806500  | 3.53767700  |
| H | 3.26903200  | 2.68558900  | 2.36450700  |
| H | 5.18725900  | -0.26320000 | -0.82184300 |
| C | 3.42662700  | -0.97276400 | 5.14195000  |
| N | 3.27029600  | -1.88671900 | 4.12632400  |
| C | 4.32612000  | -2.05582800 | 3.13180500  |
| C | 5.63705600  | -1.44951300 | 3.59698000  |
| C | 5.34892300  | -0.06062700 | 4.15321200  |
| N | 4.37824500  | -0.10827700 | 5.22293900  |
| H | 4.44609700  | -3.13873700 | 2.95124900  |
| H | 6.08547900  | -2.06853200 | 4.39196200  |
| H | 6.27096000  | 0.40836600  | 4.53257800  |
| H | 4.01419500  | -1.60398300 | 2.17612700  |
| H | 6.34163600  | -1.41286000 | 2.75313000  |

|   |             |             |            |
|---|-------------|-------------|------------|
| H | 4.98346600  | 0.57946200  | 3.32887800 |
| C | 2.46626200  | -0.98810100 | 6.32215000 |
| H | 1.57833600  | -0.37751600 | 6.08959000 |
| H | 3.01297600  | -0.45247400 | 7.10625300 |
| C | 2.04396700  | -2.38417900 | 6.78394000 |
| H | 1.84877100  | -2.37621200 | 7.86736100 |
| H | 2.88986200  | -3.07450400 | 6.62956000 |
| C | 0.80972100  | -2.89301400 | 6.03479500 |
| H | 0.74824300  | -3.99096000 | 6.11691400 |
| H | -0.10312500 | -2.49465400 | 6.50644900 |
| C | 2.12691500  | -2.75379900 | 3.84255600 |
| H | 2.42843100  | -3.80797400 | 4.01730100 |
| H | 1.92881700  | -2.65559000 | 2.76172600 |
| C | 0.82056600  | -2.47617200 | 4.56765300 |
| H | 0.01978100  | -2.98803500 | 4.01537300 |
| H | 0.57931600  | -1.41032800 | 4.46172000 |

### <sup>3</sup>TS1

E = -1776.432198 a.u

-1 3

|   |             |             |             |
|---|-------------|-------------|-------------|
| N | -0.24916000 | -1.20191700 | 1.89907000  |
| N | -1.40188200 | -1.34318400 | 2.38966500  |
| S | -2.80070600 | -0.54521800 | 1.29066400  |
| O | -3.51307500 | -1.63649300 | 0.61499700  |
| O | -3.55690900 | 0.39203400  | 2.13485800  |
| C | -1.88788700 | 0.38716200  | 0.08611100  |
| C | -1.66382800 | 1.74899900  | 0.28843900  |
| C | -1.14881000 | -0.32987000 | -0.85779200 |
| C | -0.66359500 | 2.38481800  | -0.44091300 |
| H | -2.25921500 | 2.27544600  | 1.03733700  |
| C | -0.14388300 | 0.31759900  | -1.56546400 |
| H | -1.35261900 | -1.39356300 | -0.99446200 |
| C | 0.14215300  | 1.66957500  | -1.33740000 |
| H | -0.47164600 | 3.44959000  | -0.28402900 |
| H | 0.47162500  | -0.24508100 | -2.27111900 |
| C | 1.34871100  | 2.30355500  | -1.97374400 |
| H | 1.26957300  | 3.39959300  | -1.99011100 |
| H | 2.24731000  | 2.03228000  | -1.39340700 |
| H | 1.49830100  | 1.94605100  | -3.00260700 |
| C | 0.59058100  | -0.16041600 | 2.06012700  |
| C | 1.81267400  | -0.11304200 | 1.32416200  |
| C | 0.21099700  | 0.93425500  | 3.02966900  |
| C | 2.11736000  | -1.06697100 | 0.30955200  |
| C | 2.77810300  | 0.91101300  | 1.58339100  |



|   |             |             |             |
|---|-------------|-------------|-------------|
| C | 1.01969200  | 2.20758000  | 2.80252000  |
| H | -0.87263700 | 1.12217200  | 2.94374200  |
| H | 0.36332400  | 0.58674200  | 4.07140200  |
| C | 3.29450300  | -0.98883600 | -0.42059100 |
| H | 1.38797100  | -1.85488700 | 0.11419700  |
| C | 3.94286700  | 0.96912900  | 0.82877700  |
| C | 2.50919300  | 1.87958600  | 2.70827900  |
| H | 0.83255800  | 2.92488700  | 3.61610400  |
| H | 0.69463100  | 2.67929800  | 1.86170900  |
| C | 4.22597600  | 0.02850700  | -0.17615400 |
| H | 3.49519200  | -1.73463100 | -1.19433600 |
| H | 4.66107800  | 1.76782300  | 1.04050400  |
| H | 2.83318700  | 1.42982200  | 3.66685200  |
| H | 3.11196100  | 2.79116200  | 2.56929700  |
| H | 5.15062500  | 0.09236000  | -0.75155400 |
| C | 3.42513000  | -0.97085600 | 5.14566200  |
| N | 3.29455500  | -1.84508200 | 4.09144900  |
| C | 4.35116900  | -1.93616500 | 3.08779300  |
| C | 5.64368000  | -1.30743400 | 3.57432800  |
| C | 5.31330300  | 0.04515600  | 4.19279300  |
| N | 4.34866500  | -0.08051200 | 5.26114700  |
| H | 4.50629900  | -3.00555500 | 2.85992600  |
| H | 6.11581900  | -1.94591600 | 4.33949400  |
| H | 6.22143100  | 0.52599700  | 4.59024800  |
| H | 4.01979000  | -1.45410300 | 2.15351200  |
| H | 6.34302200  | -1.21084800 | 2.73081600  |
| H | 4.92422300  | 0.71035400  | 3.39975700  |
| C | 2.46797100  | -1.06467800 | 6.32433800  |
| H | 1.55931000  | -0.47668700 | 6.11456200  |
| H | 2.99677600  | -0.54065100 | 7.12823100  |
| C | 2.09481900  | -2.49115600 | 6.73224400  |
| H | 1.90178100  | -2.53150000 | 7.81524900  |
| H | 2.96348500  | -3.14579200 | 6.55097800  |
| C | 0.87700700  | -3.01261700 | 5.96540600  |
| H | 0.85273500  | -4.11429500 | 6.00598200  |
| H | -0.04775400 | -2.66337900 | 6.45232100  |
| C | 2.18325200  | -2.74299000 | 3.77813600  |
| H | 2.52390300  | -3.79116900 | 3.91205900  |
| H | 1.97842700  | -2.61176800 | 2.70189600  |
| C | 0.86977800  | -2.54087700 | 4.51494600  |
| H | 0.08689700  | -3.06160700 | 3.94573700  |
| H | 0.58870900  | -1.48140600 | 4.44916100  |

**<sup>3</sup>Int3**

E = -1776.455621 a.u

-1 3

|   |             |             |             |
|---|-------------|-------------|-------------|
| N | -0.51372000 | -1.37791300 | 2.33299000  |
| N | -1.42993300 | -1.89277400 | 2.90803100  |
| S | -1.71038400 | 1.33697700  | 1.25122200  |
| O | -3.01406800 | 0.62987200  | 1.06626600  |
| O | -1.76360100 | 2.82011900  | 1.49650200  |
| C | -0.90323200 | 1.20956300  | -0.37845400 |
| C | 0.02141900  | 2.17688100  | -0.76572700 |
| C | -1.11501700 | 0.07673300  | -1.15638800 |
| C | 0.74910800  | 1.99620900  | -1.93780700 |
| H | 0.14857100  | 3.05720400  | -0.13206700 |
| C | -0.37929800 | -0.09443800 | -2.33004500 |
| H | -1.85791500 | -0.65164000 | -0.82289100 |
| C | 0.56799900  | 0.85422000  | -2.73029100 |
| H | 1.48350500  | 2.74763300  | -2.24243700 |
| H | -0.54001100 | -0.98233100 | -2.94811500 |
| C | 1.39972300  | 0.65084800  | -3.97144500 |
| H | 1.01836500  | -0.18392500 | -4.57555500 |
| H | 1.40797800  | 1.55340700  | -4.60053300 |
| H | 2.44656300  | 0.42618200  | -3.71073000 |
| C | 0.10964400  | -0.19261500 | 2.67344900  |
| C | 1.28069400  | 0.19000400  | 1.91508600  |
| C | -0.25825900 | 0.49730900  | 3.95710400  |
| C | 1.63459300  | -0.46966900 | 0.71583300  |
| C | 2.07268100  | 1.28289700  | 2.35130200  |
| C | 0.26728700  | 1.93099300  | 3.98703700  |
| H | -1.35400400 | 0.46576600  | 4.06241400  |
| H | 0.15532700  | -0.06811400 | 4.81802200  |
| C | 2.71914500  | -0.04973100 | -0.04099100 |
| H | 1.01552900  | -1.30379100 | 0.38401900  |
| C | 3.14983400  | 1.69561100  | 1.56417600  |
| C | 1.76207700  | 1.95138900  | 3.67076700  |
| H | 0.08888400  | 2.37292100  | 4.97879400  |
| H | -0.28651400 | 2.53152600  | 3.24918500  |
| C | 3.48382700  | 1.04455800  | 0.37533700  |
| H | 2.95818100  | -0.56718700 | -0.97265100 |
| H | 3.74281900  | 2.55185300  | 1.89862200  |
| H | 2.30848100  | 1.42191600  | 4.47525500  |
| H | 2.14810600  | 2.98253700  | 3.65785900  |
| H | 4.32708500  | 1.39308700  | -0.22367700 |
| C | 3.41129800  | -1.15661900 | 5.34469900  |
| N | 3.33272000  | -1.80861900 | 4.13360300  |
| C | 4.27994000  | -1.48213200 | 3.07166400  |

|   |            |             |            |
|---|------------|-------------|------------|
| C | 5.48598800 | -0.73224600 | 3.60537500 |
| C | 4.99197600 | 0.37523500  | 4.52675100 |
| N | 4.17002200 | -0.14750300 | 5.59397000 |
| H | 4.59532100 | -2.42913300 | 2.59947700 |
| H | 6.13554800 | -1.41373800 | 4.17923200 |
| H | 5.83902400 | 0.92308900  | 4.96899100 |
| H | 3.77412200 | -0.88854700 | 2.29283800 |
| H | 6.07065300 | -0.33266200 | 2.76374800 |
| H | 4.42139000 | 1.10879900  | 3.92786400 |
| C | 2.61107000 | -1.67406800 | 6.52963800 |
| H | 1.58853400 | -1.26318900 | 6.50133700 |
| H | 3.10438200 | -1.21604700 | 7.39390600 |
| C | 2.56987300 | -3.19879300 | 6.64833400 |
| H | 2.49872100 | -3.48940800 | 7.70747100 |
| H | 3.52760900 | -3.60491400 | 6.28290000 |
| C | 1.40733300 | -3.81024200 | 5.86263800 |
| H | 1.60890200 | -4.87571100 | 5.66332500 |
| H | 0.48856800 | -3.77620900 | 6.46996600 |
| C | 2.38436100 | -2.83296200 | 3.70187600 |
| H | 2.92938900 | -3.79078300 | 3.56892700 |
| H | 2.04047500 | -2.52736300 | 2.69801600 |
| C | 1.14809900 | -3.07386500 | 4.55207900 |
| H | 0.43309700 | -3.63885200 | 3.93719300 |
| H | 0.65019300 | -2.11221200 | 4.73622800 |

#### Int4

E = -957.511537 a.u

0 1

|   |              |             |            |
|---|--------------|-------------|------------|
| C | -12.54543000 | 9.36592700  | 7.44276200 |
| C | -11.33108200 | 9.80135700  | 6.92426800 |
| C | -11.11645300 | 11.16075000 | 6.63694800 |
| C | -12.14387600 | 12.09514300 | 6.89150200 |
| C | -13.35286600 | 11.63422800 | 7.41814100 |
| C | -13.56737200 | 10.28348200 | 7.68863100 |
| H | -12.69222600 | 8.30659900  | 7.65809900 |
| H | -10.53370100 | 9.07712500  | 6.74188800 |
| C | -9.85072800  | 11.65041400 | 6.08579200 |
| C | -11.92897000 | 13.56196300 | 6.59345000 |
| H | -14.14397600 | 12.36013200 | 7.62284800 |
| H | -14.52146500 | 9.95136800  | 8.09935000 |
| C | -10.46242700 | 13.96166900 | 6.73901900 |
| C | -9.60657900  | 13.11418100 | 5.80075100 |
| H | -12.25061100 | 13.77837800 | 5.55793000 |
| H | -10.33303000 | 15.02552600 | 6.49730800 |

|   |              |             |             |
|---|--------------|-------------|-------------|
| H | -8.53756300  | 13.34715800 | 5.91125700  |
| H | -9.89074400  | 13.35308600 | 4.75986200  |
| H | -10.13150100 | 13.81215400 | 7.77904000  |
| H | -12.56750900 | 14.16531400 | 7.25508600  |
| N | -8.91858000  | 10.78769700 | 5.82203200  |
| N | -8.11922200  | 10.01608500 | 5.58565400  |
| C | -12.24116100 | 12.52456600 | 2.88869300  |
| N | -12.12274700 | 11.19143800 | 3.23071100  |
| C | -13.26009000 | 10.49613300 | 3.82922100  |
| C | -14.55464800 | 11.25929800 | 3.62072700  |
| C | -14.31795600 | 12.71952400 | 3.97998500  |
| N | -13.22426700 | 13.28330900 | 3.22071600  |
| H | -13.32708200 | 9.49746400  | 3.36506300  |
| H | -14.86388100 | 11.19522300 | 2.56524900  |
| H | -15.22037100 | 13.32035800 | 3.79137300  |
| H | -13.07694500 | 10.33786500 | 4.90603200  |
| H | -15.35050600 | 10.81197300 | 4.23313100  |
| H | -14.11573100 | 12.79540800 | 5.06413900  |
| C | -11.19624200 | 13.16916700 | 1.98877400  |
| H | -10.33596200 | 13.52247900 | 2.58128500  |
| H | -11.69832900 | 14.06756900 | 1.61449000  |
| C | -10.71779400 | 12.27719800 | 0.84123500  |
| H | -10.44817300 | 12.89753700 | -0.02560300 |
| H | -11.55824800 | 11.64411000 | 0.51342800  |
| C | -9.52716400  | 11.40329900 | 1.24142100  |
| H | -9.43985300  | 10.54765700 | 0.55323400  |
| H | -8.59229300  | 11.97767100 | 1.14240400  |
| C | -10.99246400 | 10.29274100 | 3.02601400  |
| H | -11.25703600 | 9.54198000  | 2.25379700  |
| H | -10.87954900 | 9.72747800  | 3.96965800  |
| C | -9.64273900  | 10.90381900 | 2.67863300  |
| H | -8.87700200  | 10.13762200 | 2.87115500  |
| H | -9.43153900  | 11.72075300 | 3.38395200  |

# Int5

E = -495.9655119 a.u

0 1

|   |              |             |            |
|---|--------------|-------------|------------|
| C | -12.45233200 | 9.37210800  | 7.41618500 |
| C | -11.22808300 | 9.82688200  | 6.94233300 |
| C | -11.02067600 | 11.19093500 | 6.67489200 |
| C | -12.07323000 | 12.10484200 | 6.89670800 |
| C | -13.29261200 | 11.62616800 | 7.37998800 |
| C | -13.49470500 | 10.27264300 | 7.63818300 |
| H | -12.59184600 | 8.30866000  | 7.61593700 |

|   |              |             |            |
|---|--------------|-------------|------------|
| H | -10.41751000 | 9.11423500  | 6.77533300 |
| C | -9.73927900  | 11.70338100 | 6.18105400 |
| C | -11.87938000 | 13.57699500 | 6.60782000 |
| H | -14.10129700 | 12.33933200 | 7.55778300 |
| H | -14.45680000 | 9.92304700  | 8.01424100 |
| C | -10.42397100 | 14.01070200 | 6.76836300 |
| C | -9.51906400  | 13.16630200 | 5.87317400 |
| H | -12.20444800 | 13.79059600 | 5.57417100 |
| H | -10.31253200 | 15.07414500 | 6.51420100 |
| H | -8.46161200  | 13.42691400 | 6.02478100 |
| H | -9.75635000  | 13.37890000 | 4.81577300 |
| H | -10.11670400 | 13.88685300 | 7.81890800 |
| H | -12.53416200 | 14.16687100 | 7.26556400 |
| N | -8.76191000  | 10.86872500 | 5.99584000 |
| N | -7.91347500  | 10.13155000 | 5.83944100 |

## TS2

E = -919.8466849 a.u

0 1

|   |              |             |            |
|---|--------------|-------------|------------|
| C | -10.59155500 | 9.51527700  | 7.88726400 |
| C | -9.47973900  | 9.99584600  | 7.20942600 |
| C | -9.59358100  | 11.06957200 | 6.31349300 |
| C | -10.84137400 | 11.68119600 | 6.10631300 |
| C | -11.95419800 | 11.17626400 | 6.79097600 |
| C | -11.83917800 | 10.10589000 | 7.67032200 |
| H | -10.48951500 | 8.68034400  | 8.58144200 |
| H | -8.50040900  | 9.53579700  | 7.36587800 |
| C | -8.38709700  | 11.54199900 | 5.56624000 |
| C | -10.99432700 | 12.86939600 | 5.18061100 |
| H | -12.92667700 | 11.64933100 | 6.63550800 |
| H | -12.72036300 | 9.73496100  | 8.19563000 |
| C | -9.67828000  | 13.60779100 | 4.95391600 |
| C | -8.61147700  | 12.60926200 | 4.51323100 |
| H | -11.38221500 | 12.51836400 | 4.20820100 |
| H | -9.80742700  | 14.39075000 | 4.19331800 |
| H | -7.64975500  | 13.07850100 | 4.26513700 |
| H | -8.95830000  | 12.09634900 | 3.60124200 |
| H | -9.35831100  | 14.10253600 | 5.88495100 |
| H | -11.75871100 | 13.54605200 | 5.58949800 |
| N | -7.30453100  | 11.75056000 | 6.35899300 |
| N | -6.26577700  | 11.39396600 | 6.66344500 |
| O | -5.36401200  | 11.36501000 | 3.77200800 |
| C | -5.07139900  | 10.25816800 | 4.50531400 |
| C | -6.27768900  | 9.65026500  | 5.08044900 |

|   |             |             |            |
|---|-------------|-------------|------------|
| O | -3.93971300 | 9.87716800  | 4.65754300 |
| C | -7.53733700 | 9.89459600  | 4.56059100 |
| H | -8.34826200 | 9.20003300  | 4.78891200 |
| H | -7.59976000 | 10.40262700 | 3.59712300 |
| H | -6.08469700 | 8.84575400  | 5.78988700 |
| C | -4.25539000 | 12.00747800 | 3.15869600 |
| C | -4.76082800 | 13.22687500 | 2.41698300 |
| H | -3.75393200 | 11.30205700 | 2.47642400 |
| H | -3.51738700 | 12.27995600 | 3.92971100 |
| C | -3.64446300 | 13.96591400 | 1.68552700 |
| H | -5.53730400 | 12.91221000 | 1.70002000 |
| H | -5.24962600 | 13.90677700 | 3.13501700 |
| C | -4.14300900 | 15.20132500 | 0.94508500 |
| H | -2.86520300 | 14.25544400 | 2.40974700 |
| H | -3.15880100 | 13.27717600 | 0.97474000 |
| H | -3.32525200 | 15.71765500 | 0.42394100 |
| H | -4.90215500 | 14.93107000 | 0.19587900 |
| H | -4.60393900 | 15.91808600 | 1.64115900 |

### TS3

E = -919.8470561 a.u

0 1

|   |              |             |            |
|---|--------------|-------------|------------|
| C | -10.58236200 | 9.25255300  | 7.72274400 |
| C | -9.53940300  | 9.94697000  | 7.12691400 |
| C | -9.73624000  | 11.23725300 | 6.60987600 |
| C | -10.99811200 | 11.84832100 | 6.71725400 |
| C | -12.04085100 | 11.12922400 | 7.31448300 |
| C | -11.84477400 | 9.84542800  | 7.81000800 |
| H | -10.41541800 | 8.24983400  | 8.11784500 |
| H | -8.55058400  | 9.48813800  | 7.05039800 |
| C | -8.61664100  | 11.95223500 | 5.93733900 |
| C | -11.23469200 | 13.25900800 | 6.22266200 |
| H | -13.02227500 | 11.60125400 | 7.40183200 |
| H | -12.67246000 | 9.30800900  | 8.27493400 |
| C | -9.94286300  | 14.06444400 | 6.11759500 |
| C | -8.93244400  | 13.27779000 | 5.28401100 |
| H | -11.71172100 | 13.21371300 | 5.22788900 |
| H | -10.13975200 | 15.04140800 | 5.65426300 |
| H | -8.00234600  | 13.82797100 | 5.09289900 |
| H | -9.38914900  | 13.05767200 | 4.30608700 |
| H | -9.52993400  | 14.25112300 | 7.12176600 |
| H | -11.95557700 | 13.75566000 | 6.88832600 |
| N | -7.43164600  | 11.85942800 | 6.56501000 |
| N | -6.41060400  | 11.31948500 | 6.55575100 |

|   |              |             |             |
|---|--------------|-------------|-------------|
| O | -9.04074200  | 11.38565400 | 2.58890300  |
| C | -7.86019800  | 11.43374000 | 3.24066700  |
| C | -7.80372000  | 10.46509400 | 4.34649400  |
| O | -6.98733400  | 12.21513700 | 2.94665800  |
| C | -6.55993100  | 10.15252400 | 4.87237500  |
| H | -6.40672400  | 9.21350100  | 5.40700400  |
| H | -5.67570400  | 10.60123800 | 4.41611400  |
| H | -8.66455400  | 9.80646700  | 4.46006300  |
| C | -9.19485300  | 12.27101300 | 1.48367500  |
| C | -8.51788100  | 11.73953800 | 0.23202500  |
| H | -8.78587000  | 13.25835400 | 1.74753100  |
| H | -10.27962800 | 12.35952400 | 1.33218600  |
| C | -8.74754700  | 12.64523000 | -0.97389900 |
| H | -7.43880800  | 11.64742400 | 0.43038300  |
| H | -8.90207600  | 10.72728800 | 0.02471000  |
| C | -8.07597100  | 12.12003900 | -2.23752200 |
| H | -9.83117400  | 12.75643000 | -1.14830900 |
| H | -8.36842300  | 13.65520800 | -0.74578200 |
| H | -8.24735500  | 12.78668400 | -3.09388500 |
| H | -6.98942300  | 12.02757900 | -2.09323000 |
| H | -8.46148400  | 11.12421200 | -2.50235700 |

# Int6

E = -919.9134361 a.u

0 1

|   |              |             |            |
|---|--------------|-------------|------------|
| C | -10.58217900 | 9.27016800  | 7.78645800 |
| C | -9.54226300  | 9.75943000  | 7.00574600 |
| C | -9.70623900  | 10.89256200 | 6.19777900 |
| C | -10.93720000 | 11.56740600 | 6.20435100 |
| C | -11.98066300 | 11.06039800 | 6.99049300 |
| C | -11.81542500 | 9.92307400  | 7.77172400 |
| H | -10.43110700 | 8.38642600  | 8.40754500 |
| H | -8.57425600  | 9.25187400  | 7.02951200 |
| C | -8.51646400  | 11.39598800 | 5.38601900 |
| C | -11.16108000 | 12.81867800 | 5.38374100 |
| H | -12.93960300 | 11.58419300 | 6.99041700 |
| H | -12.64250300 | 9.55138900  | 8.37842000 |
| C | -9.85305200  | 13.50711900 | 5.01375100 |
| C | -8.90772000  | 12.49100700 | 4.38930700 |
| H | -11.70411800 | 12.54656100 | 4.46129200 |
| H | -10.04129000 | 14.33713400 | 4.31806600 |
| H | -7.97999700  | 12.95721100 | 4.02319600 |
| H | -9.39622100  | 12.00923400 | 3.52546600 |
| H | -9.38103800  | 13.92741200 | 5.91476400 |

|   |              |             |            |
|---|--------------|-------------|------------|
| H | -11.82223900 | 13.49939800 | 5.93987000 |
| N | -7.57698900  | 12.02105600 | 6.37382600 |
| N | -6.48683400  | 11.47247600 | 6.44095900 |
| O | -5.27906500  | 11.69284300 | 3.93468000 |
| C | -5.13365800  | 10.57025400 | 4.64459900 |
| C | -6.36037900  | 10.31920700 | 5.50395800 |
| O | -4.16388700  | 9.86900200  | 4.59739200 |
| C | -7.67949400  | 10.27787200 | 4.72427700 |
| H | -8.16865600  | 9.29992800  | 4.78635100 |
| H | -7.51293800  | 10.51278800 | 3.66564800 |
| H | -6.14768700  | 9.42330900  | 6.10225600 |
| C | -4.17871300  | 12.06611700 | 3.10471500 |
| C | -4.52813200  | 13.36399300 | 2.41066100 |
| H | -3.98212600  | 11.25633400 | 2.38454000 |
| H | -3.27917700  | 12.16734400 | 3.73145200 |
| C | -3.40415200  | 13.85183200 | 1.50141000 |
| H | -5.45083500  | 13.21952000 | 1.82486300 |
| H | -4.75409800  | 14.12513500 | 3.17485200 |
| C | -3.74687900  | 15.15955600 | 0.79753800 |
| H | -2.48490800  | 13.97992500 | 2.09641100 |
| H | -3.17750000  | 13.07479000 | 0.75265300 |
| H | -2.92644500  | 15.49495900 | 0.14870800 |
| H | -4.64571900  | 15.04657100 | 0.17331100 |
| H | -3.94742800  | 15.95777600 | 1.52741500 |

#### TS4

E = -1381.438895 a.u

0 1

|   |              |             |            |
|---|--------------|-------------|------------|
| C | -9.17079100  | 8.54888100  | 7.87958200 |
| C | -8.86947100  | 9.27995800  | 6.73545800 |
| C | -9.80482400  | 10.12550600 | 6.12701900 |
| C | -11.08982900 | 10.22189200 | 6.68917200 |
| C | -11.38816500 | 9.47446100  | 7.83697600 |
| C | -10.44558100 | 8.64737200  | 8.43829900 |
| H | -8.41283500  | 7.90319100  | 8.33168300 |
| H | -7.87898700  | 9.20985600  | 6.28915800 |
| C | -9.37980500  | 10.97366900 | 4.93361400 |
| C | -12.16636400 | 11.07933200 | 6.06071900 |
| H | -12.39003400 | 9.55342000  | 8.26654600 |
| H | -10.70420700 | 8.08155400  | 9.33463100 |
| C | -11.60357200 | 12.14033700 | 5.12260000 |
| C | -10.59304900 | 11.51074300 | 4.17184600 |
| H | -12.84495500 | 10.41538000 | 5.49582600 |
| H | -12.41977000 | 12.62076800 | 4.56390500 |



|   |              |             |            |
|---|--------------|-------------|------------|
| H | -10.23282400 | 12.24460400 | 3.43540000 |
| H | -11.05785800 | 10.68116500 | 3.61056000 |
| H | -11.08905800 | 12.91967700 | 5.70354700 |
| H | -12.77651100 | 11.53579100 | 6.85470700 |
| N | -8.65580900  | 12.17519900 | 5.50877600 |
| N | -7.46696300  | 12.19684900 | 5.15243000 |
| O | -5.10717700  | 12.17973000 | 3.72973100 |
| C | -5.99443900  | 11.20662400 | 3.42438200 |
| C | -7.07303700  | 11.07777400 | 4.39094400 |
| O | -5.81957900  | 10.44740300 | 2.49265900 |
| C | -8.33109500  | 10.30831300 | 4.01568000 |
| H | -8.26922500  | 9.22119700  | 4.17074100 |
| H | -8.57895500  | 10.46084200 | 2.95292200 |
| H | -6.11493300  | 10.50305000 | 5.41257000 |
| C | -3.97510200  | 12.27084400 | 2.88160900 |
| C | -3.09958200  | 13.39871900 | 3.38634200 |
| H | -4.30130500  | 12.44964100 | 1.84419000 |
| H | -3.43385200  | 11.31019600 | 2.87906200 |
| C | -1.85133000  | 13.59449800 | 2.53233300 |
| H | -3.69484500  | 14.32583200 | 3.40742600 |
| H | -2.81471700  | 13.18751300 | 4.43043200 |
| C | -0.96335300  | 14.72599400 | 3.03710300 |
| H | -1.27573700  | 12.65401400 | 2.50617200 |
| H | -2.15174900  | 13.79549700 | 1.49058800 |
| H | -0.07101100  | 14.85291700 | 2.40855800 |
| H | -1.51011200  | 15.68068700 | 3.04331600 |
| H | -0.62609800  | 14.53171300 | 4.06635000 |
| C | -5.50952900  | 8.95126200  | 6.73979700 |
| N | -5.53259600  | 8.57253000  | 8.03418800 |
| C | -5.76900700  | 9.55772800  | 9.10076700 |
| C | -6.22731800  | 10.90572700 | 8.57030200 |
| C | -5.37206300  | 11.27040300 | 7.36689200 |
| N | -5.46226500  | 10.20525700 | 6.38519200 |
| H | -6.52941100  | 9.12990600  | 9.77392500 |
| H | -7.28029300  | 10.86371300 | 8.25367400 |
| H | -5.71801700  | 12.18971800 | 6.87538900 |
| H | -4.83793500  | 9.66409400  | 9.68430900 |
| H | -6.14760200  | 11.65613100 | 9.36782900 |
| H | -4.31719200  | 11.40737700 | 7.65971400 |
| C | -5.59437700  | 7.97153900  | 5.58774900 |
| H | -4.56732600  | 7.75052200  | 5.25274000 |
| H | -6.03995900  | 8.54185900  | 4.75709900 |
| C | -6.36418000  | 6.68250500  | 5.86063800 |
| H | -6.74949800  | 6.28746500  | 4.91066300 |

|   |             |            |            |
|---|-------------|------------|------------|
| H | -7.25273800 | 6.91262000 | 6.47028300 |
| C | -5.50038300 | 5.62822200 | 6.55191100 |
| H | -6.14455200 | 4.84317900 | 6.97698500 |
| H | -4.85123500 | 5.13255600 | 5.81359400 |
| C | -5.36462600 | 7.21280800 | 8.55379600 |
| H | -6.35211600 | 6.80328800 | 8.83825200 |
| H | -4.79664900 | 7.32736900 | 9.48993900 |
| C | -4.62724800 | 6.23285200 | 7.65118200 |
| H | -4.22476000 | 5.43065900 | 8.28626300 |
| H | -3.75204300 | 6.74541100 | 7.22193200 |

# TS5

E = -1072.557686 a.u

0 1

|   |             |             |             |
|---|-------------|-------------|-------------|
| C | -1.02947000 | -1.30192400 | 3.54130600  |
| C | -1.03440000 | -1.17583300 | 2.15576800  |
| C | -2.11438600 | -0.59136700 | 1.47551700  |
| C | -3.22324900 | -0.14721200 | 2.21936700  |
| C | -3.20805500 | -0.28762300 | 3.61279100  |
| C | -2.12380100 | -0.85002100 | 4.27715700  |
| H | -0.17575300 | -1.75927300 | 4.04338500  |
| H | -0.18506800 | -1.56153500 | 1.58878800  |
| C | -2.02850800 | -0.35123200 | -0.02954700 |
| C | -4.45704800 | 0.42070900  | 1.55054400  |
| H | -4.07429500 | 0.05666500  | 4.18335500  |
| H | -2.13482400 | -0.94232100 | 5.36421900  |
| C | -4.19906900 | 0.91263900  | 0.13189700  |
| C | -3.40820200 | -0.13015600 | -0.64770000 |
| H | -5.22262000 | -0.37500900 | 1.52418800  |
| H | -5.15214600 | 1.13340300  | -0.36989900 |
| H | -3.26748700 | 0.18174700  | -1.69335400 |
| H | -3.94853600 | -1.09272000 | -0.65994900 |
| H | -3.61466000 | 1.84434500  | 0.15639800  |
| H | -4.87437700 | 1.22342000  | 2.17685500  |
| N | -1.23951800 | 0.93218200  | -0.18050900 |
| N | -0.12217100 | 0.70430500  | -0.70151700 |
| O | 2.23317800  | -0.12120600 | -1.81304200 |
| C | 3.27955100  | -0.33896900 | -2.75493400 |
| C | 1.17992500  | -1.00619900 | -1.85893600 |
| C | 4.17396100  | 0.88410100  | -2.73949200 |
| H | 2.83593800  | -0.50104600 | -3.74894000 |
| H | 3.82749300  | -1.25633600 | -2.49008900 |
| C | 0.12804100  | -0.63747500 | -0.92680500 |
| O | 1.22237800  | -1.99478200 | -2.54609000 |

|   |             |             |             |
|---|-------------|-------------|-------------|
| C | 3.44305900  | 2.16202300  | -3.14358900 |
| H | 5.02288400  | 0.70158800  | -3.41826400 |
| H | 4.60784200  | 1.00313700  | -1.73067000 |
| C | -1.17525900 | -1.39269500 | -0.79090100 |
| C | 4.33373000  | 3.39680100  | -3.08201300 |
| H | 3.04679300  | 2.03633700  | -4.16487100 |
| H | 2.56408100  | 2.28807100  | -2.49211600 |
| H | -1.09281100 | -2.34643600 | -0.25355500 |
| H | -1.60956600 | -1.60945800 | -1.78101800 |
| H | 5.20305500  | 3.29278100  | -3.74870300 |
| H | 3.78878600  | 4.30278600  | -3.38085000 |
| H | 4.71784000  | 3.55727600  | -2.06298200 |
| H | 1.17529100  | -0.43988900 | 0.35309200  |
| O | 1.92529500  | 0.10518800  | 0.92300700  |
| H | 2.41209000  | 0.45090600  | 0.14632800  |
| H | -0.37596400 | 1.75846200  | 1.28822600  |
| O | 0.45999400  | 1.94342300  | 1.78599300  |
| H | 1.36124100  | 0.90895800  | 1.32559500  |
| H | 0.71694000  | 2.82694200  | 1.49237100  |

# **TS6**

E = -996.1850212 a.u

0 1

|   |             |             |             |
|---|-------------|-------------|-------------|
| C | -1.29141300 | -1.52182500 | 3.68689700  |
| C | -1.14533200 | -1.27497100 | 2.32603800  |
| C | -2.13993800 | -0.61023600 | 1.59198400  |
| C | -3.30788900 | -0.19053700 | 2.25028400  |
| C | -3.44543700 | -0.45280300 | 3.61981500  |
| C | -2.45250300 | -1.10698900 | 4.33966400  |
| H | -0.50808700 | -2.04705400 | 4.23577200  |
| H | -0.24508400 | -1.61859600 | 1.81036900  |
| C | -1.89615900 | -0.29525700 | 0.11667900  |
| C | -4.43395200 | 0.49896700  | 1.51093900  |
| H | -4.35798100 | -0.12882100 | 4.12629100  |
| H | -2.58408400 | -1.29698100 | 5.40593500  |
| C | -3.98722800 | 1.10781300  | 0.18756500  |
| C | -3.18581200 | 0.08560600  | -0.60822600 |
| H | -5.22653300 | -0.24614500 | 1.32005900  |
| H | -4.86079100 | 1.44782800  | -0.38665100 |
| H | -2.91821700 | 0.47212300  | -1.60310900 |
| H | -3.78051100 | -0.83085400 | -0.76298500 |
| H | -3.35048300 | 1.98546900  | 0.37452500  |
| H | -4.88282600 | 1.26175500  | 2.16439500  |
| N | -0.99628700 | 0.91255100  | 0.14702500  |

|   |             |             |             |
|---|-------------|-------------|-------------|
| N | 0.12399100  | 0.60494500  | -0.28903300 |
| O | 2.17769400  | -0.09064300 | -1.89792300 |
| C | 3.12324800  | -0.30327700 | -2.94024200 |
| C | 1.19073300  | -1.01453500 | -1.78370500 |
| C | 4.07073600  | 0.87828300  | -2.95243300 |
| H | 2.58808800  | -0.40377400 | -3.89764200 |
| H | 3.65182200  | -1.25270800 | -2.76380400 |
| C | 0.30552600  | -0.74799100 | -0.65139300 |
| O | 1.11075700  | -1.97013600 | -2.51630400 |
| C | 3.37693900  | 2.20174600  | -3.26247200 |
| H | 4.85852300  | 0.68193600  | -3.69811600 |
| H | 4.57158400  | 0.94090100  | -1.97172100 |
| C | -1.06883600 | -1.38058900 | -0.61481400 |
| C | 4.33302200  | 3.38801900  | -3.23917300 |
| H | 2.89302400  | 2.12940000  | -4.25091700 |
| H | 2.56510900  | 2.35289200  | -2.53439000 |
| H | -1.11018400 | -2.34657200 | -0.09492500 |
| H | -1.44311900 | -1.54497500 | -1.63830700 |
| H | 5.13935500  | 3.26213000  | -3.97763600 |
| H | 3.81455800  | 4.32984800  | -3.46600700 |
| H | 4.80433800  | 3.49416400  | -2.25036600 |
| H | 1.61272300  | -0.58887300 | 0.45775600  |
| O | 2.16974500  | 0.25537500  | 0.87107500  |
| H | 1.45936700  | 0.88193200  | 0.31426800  |
| H | 1.89721500  | 0.31852800  | 1.80110500  |

# TS7

E = -919.8218672 a.u

0 1

|   |             |             |             |
|---|-------------|-------------|-------------|
| C | -0.72766400 | -1.31404200 | 3.19528600  |
| C | -0.86104200 | -1.00160400 | 1.84690900  |
| C | -2.04343800 | -0.43820200 | 1.34238500  |
| C | -3.11138600 | -0.18777000 | 2.22135100  |
| C | -2.96496500 | -0.51559600 | 3.57536000  |
| C | -1.78919500 | -1.07072200 | 4.06669900  |
| H | 0.20099800  | -1.75187300 | 3.56376900  |
| H | -0.02654300 | -1.20469400 | 1.17198400  |
| C | -2.11970000 | -0.04223800 | -0.13172000 |
| C | -4.42534100 | 0.38873600  | 1.73969200  |
| H | -3.79963400 | -0.32378900 | 4.25414400  |
| H | -1.69987200 | -1.31419500 | 5.12644000  |
| C | -4.31046200 | 1.07464400  | 0.38443300  |
| C | -3.56290100 | 0.17309000  | -0.58789700 |
| H | -5.15686200 | -0.43558100 | 1.66885500  |

|   |             |             |             |
|---|-------------|-------------|-------------|
| H | -5.30947800 | 1.31983500  | -0.00293800 |
| H | -3.54144700 | 0.60552800  | -1.59883000 |
| H | -4.05959000 | -0.81019100 | -0.65645600 |
| H | -3.75394100 | 2.01937600  | 0.48338200  |
| H | -4.81766400 | 1.08052800  | 2.49980700  |
| N | -1.38882100 | 1.26505700  | -0.26580900 |
| N | -0.22307400 | 1.00146000  | -0.88503100 |
| O | 2.13556200  | 0.17858100  | -1.99751300 |
| C | 3.34232000  | -0.24372000 | -2.63001300 |
| C | 1.15784400  | -0.73480300 | -1.93009200 |
| C | 4.28495800  | 0.94017100  | -2.66774500 |
| H | 3.10668400  | -0.60840000 | -3.64251400 |
| H | 3.76478000  | -1.09148900 | -2.06967000 |
| C | -0.05349700 | -0.23065800 | -1.28765500 |
| O | 1.26492600  | -1.86339000 | -2.34255600 |
| C | 3.74456400  | 2.11466900  | -3.47852800 |
| H | 5.24480200  | 0.59948300  | -3.08926200 |
| H | 4.49108300  | 1.26406200  | -1.63411800 |
| C | -1.33005700 | -0.99706800 | -1.06805700 |
| C | 4.69476900  | 3.30578900  | -3.49228800 |
| H | 3.54929000  | 1.77832400  | -4.51068100 |
| H | 2.77018600  | 2.41076100  | -3.06083700 |
| H | -1.15424700 | -1.98717200 | -0.62473400 |
| H | -1.86206000 | -1.15560100 | -2.02076600 |
| H | 5.66844900  | 3.03183300  | -3.92606100 |
| H | 4.28806600  | 4.13982400  | -4.08056600 |
| H | 4.87865800  | 3.67368800  | -2.47165400 |
| H | -0.13297800 | 1.65099300  | 0.06882800  |

# Int7

E = -1381.458926 a.u

0 1

|   |              |             |            |
|---|--------------|-------------|------------|
| C | -8.79308000  | 7.80415400  | 6.57857500 |
| C | -8.77072600  | 8.88366100  | 5.69929700 |
| C | -9.73559100  | 9.90279600  | 5.76703900 |
| C | -10.75344400 | 9.80771300  | 6.73400100 |
| C | -10.76484500 | 8.71480100  | 7.61196100 |
| C | -9.79454800  | 7.71909800  | 7.54844300 |
| H | -8.04587700  | 7.01076300  | 6.49072600 |
| H | -7.98639600  | 8.95330000  | 4.94134300 |
| C | -9.55962300  | 11.15304500 | 4.90836800 |
| C | -11.84411400 | 10.85254000 | 6.82913200 |
| H | -11.55935900 | 8.65058300  | 8.36005300 |
| H | -9.83032000  | 6.87278100  | 8.23728900 |

|   |              |             |             |
|---|--------------|-------------|-------------|
| C | -11.42863400 | 12.19265200 | 6.23241500  |
| C | -10.83959400 | 11.98264700 | 4.84305800  |
| H | -12.72968900 | 10.47500700 | 6.28723200  |
| H | -12.29260700 | 12.87228500 | 6.19562300  |
| H | -10.59178100 | 12.94447000 | 4.37069300  |
| H | -11.57245000 | 11.47257200 | 4.19291700  |
| H | -10.65918900 | 12.66306100 | 6.86375400  |
| H | -12.15345400 | 10.96264300 | 7.87983500  |
| N | -8.49564600  | 11.92748600 | 5.63982700  |
| N | -7.40916500  | 11.85929300 | 4.96960100  |
| O | -5.21121600  | 11.49112700 | 3.34221700  |
| C | -6.42776000  | 11.06779400 | 2.86165700  |
| C | -7.50248700  | 11.22865100 | 3.79045200  |
| O | -6.51850600  | 10.57951200 | 1.75201200  |
| C | -8.93914800  | 10.86232400 | 3.52175400  |
| H | -9.07881800  | 9.81986400  | 3.19852200  |
| H | -9.38642800  | 11.50201200 | 2.74067100  |
| H | -6.28582900  | 11.78518500 | 6.34018800  |
| C | -4.13070800  | 11.36919800 | 2.43816100  |
| C | -2.87438100  | 11.85582600 | 3.13189500  |
| H | -4.33579200  | 11.95815100 | 1.52906500  |
| H | -4.02737400  | 10.32132800 | 2.10930800  |
| C | -1.64694600  | 11.79614500 | 2.22855800  |
| H | -3.03902300  | 12.88834100 | 3.48061500  |
| H | -2.70247500  | 11.24548300 | 4.03542200  |
| C | -0.37699300  | 12.27219700 | 2.92426600  |
| H | -1.50915300  | 10.76278600 | 1.86876900  |
| H | -1.82958100  | 12.40798200 | 1.32988900  |
| H | 0.49408600   | 12.22477700 | 2.25616000  |
| H | -0.48314000  | 13.31257000 | 3.26621300  |
| H | -0.15690200  | 11.65440800 | 3.80816100  |
| C | -5.73203900  | 10.09854500 | 7.26660200  |
| N | -5.98677300  | 9.26121600  | 8.27551200  |
| C | -7.00015200  | 9.58519300  | 9.29222200  |
| C | -7.88330100  | 10.74233200 | 8.87243800  |
| C | -7.01441000  | 11.86970900 | 8.34650900  |
| N | -6.17261200  | 11.33814300 | 7.28508700  |
| H | -7.60842800  | 8.67899500  | 9.43421000  |
| H | -8.55919100  | 10.43170100 | 8.06259400  |
| H | -7.62559800  | 12.65813800 | 7.89512800  |
| H | -6.48019000  | 9.79707900  | 10.24251500 |
| H | -8.49166800  | 11.06822400 | 9.72618200  |
| H | -6.38009000  | 12.29606900 | 9.14158300  |
| C | -4.92722300  | 9.72343600  | 6.04775300  |

|   |             |             |            |
|---|-------------|-------------|------------|
| H | -3.87540400 | 9.99252100  | 6.24415500 |
| H | -5.25684200 | 10.40109200 | 5.24707200 |
| C | -5.04211200 | 8.26893600  | 5.60221800 |
| H | -4.85522000 | 8.21555700  | 4.52049400 |
| H | -6.08181200 | 7.93701900  | 5.74475200 |
| C | -4.08454400 | 7.34877200  | 6.35671800 |
| H | -4.38655800 | 6.30004000  | 6.21212300 |
| H | -3.06849000 | 7.43992200  | 5.94256600 |
| C | -5.41557900 | 7.92184100  | 8.46336400 |
| H | -6.14609300 | 7.17307900  | 8.10795900 |
| H | -5.34274500 | 7.79561500  | 9.55374600 |
| C | -4.04376800 | 7.67580500  | 7.84944800 |
| H | -3.57732400 | 6.84572200  | 8.39920600 |
| H | -3.41254400 | 8.55718900  | 8.04337200 |

# Int8

E = -1381.48068 a.u

0 1

|   |              |             |            |
|---|--------------|-------------|------------|
| C | -8.91964600  | 8.62658600  | 7.59334100 |
| C | -8.73884100  | 9.57771900  | 6.59700400 |
| C | -9.79619500  | 10.39423200 | 6.16643600 |
| C | -11.04785900 | 10.27555100 | 6.78970300 |
| C | -11.22772400 | 9.28824300  | 7.77131400 |
| C | -10.18268600 | 8.46505500  | 8.17107400 |
| H | -8.08427500  | 7.99820500  | 7.90924900 |
| H | -7.75580000  | 9.69893500  | 6.13242400 |
| C | -9.52631400  | 11.39499900 | 5.04120900 |
| C | -12.18091400 | 11.22115700 | 6.45916500 |
| H | -12.20772200 | 9.19166900  | 8.24518600 |
| H | -10.34454500 | 7.70900200  | 8.94116400 |
| C | -11.66235700 | 12.51145900 | 5.83511400 |
| C | -10.79373700 | 12.15976000 | 4.63707800 |
| H | -12.87687800 | 10.73328600 | 5.75419400 |
| H | -12.49894200 | 13.15782000 | 5.53434500 |
| H | -10.47911200 | 13.05086900 | 4.07616700 |
| H | -11.38034500 | 11.52644300 | 3.94975300 |
| H | -11.06580400 | 13.07384900 | 6.57351600 |
| H | -12.75783000 | 11.42181400 | 7.37446600 |
| N | -8.45141200  | 12.33129200 | 5.46087900 |
| N | -7.29853600  | 12.09435500 | 4.84346400 |
| O | -5.16484200  | 11.26623800 | 3.35915500 |
| C | -6.36141900  | 10.76207200 | 3.03564600 |
| C | -7.45281000  | 11.22742200 | 3.90284200 |
| O | -6.53072700  | 9.98083400  | 2.13132900 |

|   |              |             |             |
|---|--------------|-------------|-------------|
| C | -8.86718200  | 10.72528000 | 3.79838200  |
| H | -8.92980300  | 9.62792800  | 3.81089600  |
| H | -9.34044200  | 11.06895800 | 2.86490800  |
| H | -8.33831400  | 12.62203500 | 6.44955400  |
| C | -4.07638200  | 10.84757800 | 2.54520800  |
| C | -2.81835400  | 11.50848500 | 3.06624200  |
| H | -4.27574900  | 11.12499400 | 1.49752400  |
| H | -3.99956100  | 9.74861200  | 2.57291500  |
| C | -1.58509300  | 11.12972400 | 2.25242800  |
| H | -2.96070100  | 12.60105500 | 3.05438100  |
| H | -2.67757800  | 11.22312600 | 4.12170200  |
| C | -0.31306100  | 11.78848300 | 2.77334200  |
| H | -1.46554800  | 10.03346600 | 2.25977800  |
| H | -1.74392800  | 11.41140000 | 1.19825300  |
| H | 0.56356900   | 11.50536300 | 2.17465300  |
| H | -0.39974500  | 12.88489500 | 2.74726500  |
| H | -0.11795600  | 11.49650300 | 3.81604000  |
| C | -7.02052700  | 11.77088800 | 8.68588800  |
| N | -7.13040400  | 11.03651500 | 9.84519100  |
| C | -8.39249000  | 10.99153400 | 10.58056500 |
| C | -9.51313600  | 11.69356100 | 9.83937300  |
| C | -8.95783700  | 12.97027200 | 9.22705700  |
| N | -7.87467000  | 12.66512400 | 8.31864300  |
| H | -8.65552800  | 9.93171700  | 10.74754900 |
| H | -9.88046000  | 11.05238500 | 9.02684100  |
| H | -9.73914100  | 13.52149500 | 8.68287400  |
| H | -8.23988900  | 11.44551900 | 11.57711100 |
| H | -10.35019600 | 11.88656800 | 10.52550900 |
| H | -8.59846500  | 13.64420900 | 10.02858800 |
| C | -5.83507500  | 11.56562100 | 7.76173600  |
| H | -5.03678200  | 12.26163900 | 8.07099700  |
| H | -6.16046100  | 11.92656000 | 6.77974500  |
| C | -5.28200400  | 10.14505400 | 7.66650900  |
| H | -4.85109200  | 9.98999300  | 6.66620500  |
| H | -6.11348100  | 9.42770800  | 7.75777800  |
| C | -4.23848400  | 9.86029500  | 8.74511700  |
| H | -4.06157800  | 8.77564800  | 8.82080400  |
| H | -3.27520500  | 10.31534200 | 8.46530900  |
| C | -6.14111000  | 10.13444600 | 10.42675400 |
| H | -6.39050300  | 9.08441100  | 10.17270600 |
| H | -6.27231300  | 10.21909200 | 11.51790000 |
| C | -4.67764900  | 10.40995600 | 10.10244500 |
| H | -4.06470500  | 9.96298200  | 10.89889500 |
| H | -4.50821300  | 11.49605300 | 10.16061500 |



**P**

E = -919.9284083 a.u

0 1

|   |             |             |             |
|---|-------------|-------------|-------------|
| C | -0.59015000 | -1.87859100 | 3.09180000  |
| C | -0.71556000 | -1.37684500 | 1.80223300  |
| C | -1.86409000 | -0.67631100 | 1.40085400  |
| C | -2.89917600 | -0.47026300 | 2.32907800  |
| C | -2.76028000 | -0.98588100 | 3.62533000  |
| C | -1.62310200 | -1.68456000 | 4.01046600  |
| H | 0.31104900  | -2.42112500 | 3.38030400  |
| H | 0.09865800  | -1.52713600 | 1.08989100  |
| C | -1.92584400 | -0.08489600 | -0.00702100 |
| C | -4.16921000 | 0.26680200  | 1.96086800  |
| H | -3.56913200 | -0.82681400 | 4.34266100  |
| H | -1.53828100 | -2.07462400 | 5.02580400  |
| C | -4.00744400 | 1.13634900  | 0.72043800  |
| C | -3.34955400 | 0.32529900  | -0.38657500 |
| H | -4.96144100 | -0.47920600 | 1.77343200  |
| H | -4.98383000 | 1.52146400  | 0.39447800  |
| H | -3.29813300 | 0.89187800  | -1.32708500 |
| H | -3.93947600 | -0.58778300 | -0.57648200 |
| H | -3.38089300 | 2.01527800  | 0.94731600  |
| H | -4.50737800 | 0.86155900  | 2.82231200  |
| N | -1.02221500 | 1.10141000  | -0.07111300 |
| N | 0.13009900  | 0.83792700  | -0.70600600 |
| O | 2.18408000  | -0.07804800 | -2.25420400 |
| C | 3.24062000  | -0.56364600 | -3.07972400 |
| C | 1.10260800  | -0.85100900 | -2.16896000 |
| C | 4.34347500  | 0.47325500  | -3.07437100 |
| H | 2.84916400  | -0.73715500 | -4.09502800 |
| H | 3.58285700  | -1.53551400 | -2.69302300 |
| C | 0.03609100  | -0.28797700 | -1.31723400 |
| O | 0.99039000  | -1.91540300 | -2.72462500 |
| C | 3.90049700  | 1.82369000  | -3.63028800 |
| H | 5.18729100  | 0.07825000  | -3.66357500 |
| H | 4.70833800  | 0.59815900  | -2.04160600 |
| C | -1.28032800 | -0.98409800 | -1.09276700 |
| C | 5.01480800  | 2.86269900  | -3.60463500 |
| H | 3.53950500  | 1.68591200  | -4.66353500 |
| H | 3.03808300  | 2.17641400  | -3.04462500 |
| H | -1.16021700 | -2.03165200 | -0.78469500 |
| H | -1.88188300 | -0.98310100 | -2.01560400 |
| H | 5.87899500  | 2.53382900  | -4.20168900 |

|   |             |            |             |
|---|-------------|------------|-------------|
| H | 4.67632000  | 3.82741700 | -4.00706700 |
| H | 5.36797600  | 3.03394700 | -2.57667400 |
| H | -0.90274100 | 1.66795200 | 0.76297300  |

## 9. References

- [1] Houk, K. N.; Sims, J.; Duke, R. E.; Strozier, R. W.; George, J. K. *J. Am. Chem. Soc.*, **1973**, *95*, 7287-7301.
- [2] Zhang, B. H.; Lei, L. S.; Liu, S. Z.; Mou, X. Q.; Liu, W. T.; Wang, S. H.; Wang, J.; Bao, W.; Zhang, K. *Chem. Commun.* **2017**, *53*, 8545–8548.
- [3] Su, Y. L.; Dong, K.; Zheng, H.; and Doyle, M. P. *Angew. Chem.* **2021**, *133*, 18632–18636.
- [4] Jangra, H.; Chen, Q.; Fuks, E.; Zenz, I.; Mayer, P.; Ofial, A. R.; and Mayr, H. *J. Am. Chem. Soc.* **2018**, *140*, 16758–16772.
- [5] a) Linden, M.; Hofmann, S.; Herman, A.; Ehler, N.; Bär, R.M.; and Waldvogel, S. R. *Angew. Chem., Int. Ed.* **2022**, *62*, e202214820; b) Croisetière.; Jean-Philippe.; and Claude Spino. *J. Org. Chem.* **2018**, *83*, 5609–5618.
- [6] Aggarwal, V. K.; Bae, I.; Lee, H. Y. A *Tetrahedron*, **2004**, *60*, 9725-9733.
- [7] Li, H.; Wang, L.; Zhang, Y. Wang, J. *Angew. Chem.*, **2012**, *124*, 2997-3000.
- [8] a) Huang, X.; Chen, X.; Xie, H.; Tan, Z.; Jiang, H.; Zeng, W. *Org. Lett.* **2021**, *23*, 6784-6788. b) Barluenga, J.; Tomás-Gamasa, M.; Aznar, F.; Valdés, C. *Angew. Chem., Int. Ed.*, **2010**, *49*, 4993-4996. c) Pérez-Aguilar, M. C.; Valdés, C. *Angew. Chem., Int. Ed.*, **2012**, *24*, 5953-5957. d) Barluenga, J. Tomás-Gamasa, M. Valdés, C. *Angew. Chem., Int. Ed.*, **2012**, *24*, 5950-5952.
- [9] v. Pechmann, H. *Berichte der deutschen chemischen Gesellschaft*, **1895**, *28*, 855-861.
- [10] Breugst, M.; Reissig, H. U. *Angew. Chem., Int. Ed.*, **2020**, *59*, 12293-12307.
- [11] Houk, K. N.; Sims, J.; Watts, C. R.; Luskus, L. J. *J. Am. Chem. Soc.*, **1973**, *95*, 7301-7315.
- [12] Hatchard, C. G.; Parker, C. A. *Proc. Roy. Soc. (London)* **1956**, *A235*, 518–536.
- [13] a) Kuhn, H. J.; Braslavsky, S. E.; Schmidt, R. *Pure Appl. Chem.* **2004**, *76*, 2105–2146. b) Monalti, M. *et. al.* Chemical Actinometry. *Handbook of Photochemistry*, 3rd Ed; Taylor & Francis Group, LLC. Boca Raton, FL, **2006**, 601–616.
- [14] Hatchard, C. G.; Parker, C. A. *Proc. R. Soc. London Ser. A* **1956**, *235*, 518–536.
- [15] Gaussian 16, Revision A.03, Frisch, M. J.; Trucks, G. W.; Schlegel, H. B.; Scuseria, G. E.; Robb, M. A.; Cheeseman, J. R.; Scalmani, G.; Barone, V.; Petersson, G. A.; Nakatsuji, H.; Li, X.; Caricato, M.; Marenich, A. V.; Bloino, J.; Janesko, B. G.; Gomperts, R.; Mennucci, B.; Hratchian, H. P.; Ortiz, J. V.; Izmaylov, A. F.; Sonnenberg, J. L.; Williams-Young, D.; Ding, F.; Lipparini, F.; Egidi, F.; Goings, J.;

Peng, B.; Petrone, A.; Henderson, T.; Ranasinghe, D.; Zakrzewski, V. G.; Gao, J.; Rega, N.; Zheng, G.; Liang, W.; Hada, M.; Ehara, M.; Toyota, K.; Fukuda, R.; Hasegawa, J.; Ishida, M.; Nakajima, T.; Honda, Y.; Kitao, O.; Nakai, H.; Vreven, T.; Throssell, K.; Montgomery, J. A., Jr.; Peralta, J. E.; Ogliaro, F.; Bearpark, M. J.; Heyd, J. J.; Brothers, E. N.; Kudin, K. N.; Staroverov, V. N.; T. A. Keith, T. A.; Kobayashi, R.; Normand, J.; Raghavachari, K.; Rendell, A. P.; Burant, J. C.; Iyengar, S. S.; Tomasi, J.; Cossi, M.; Millam, J. M.; Klene, M.; Adamo, C.; Cammi, R.; Ochterski, J. W.; Martin, R. L.; Morokuma, K.; Farkas, O.; J. B. Foresman, J. B.; Fox, D. J.; Gaussian, Inc., Wallingford CT, **2016**.

[16] Zhao, Y.; Truhlar, D. G. *Theor Chem Account.*, **2008**, *120*, 215.

[17] Weigend, F.; Ahlrichs, R. Balanced basis sets of split valence, triple zeta valence and quadruple zeta valence quality for H to Rn: Design and assessment of accuracy. *Phys. Chem. Chem. Phys.* **2005**, *7*, 3297.

[18] Marenich, A. V.; Cramer, C. J.; Truhlar, D. G. *J. Phys. Chem. B.*, **2009**, *113*, 6378.

[19] Weigend, F. Accurate Coulomb-fitting basis sets for H to Rn. *Phys. Chem. Chem. Phys.* **2006**, *8*, 1057.

## 10. NMR spectra of products and synthesized substrates

$^1\text{H}$  NMR (500 MHz,  $\text{CDCl}_3$ ) and  $^{13}\text{C}$  NMR (126 MHz,  $\text{CDCl}_3$ ) spectra for **1d**:

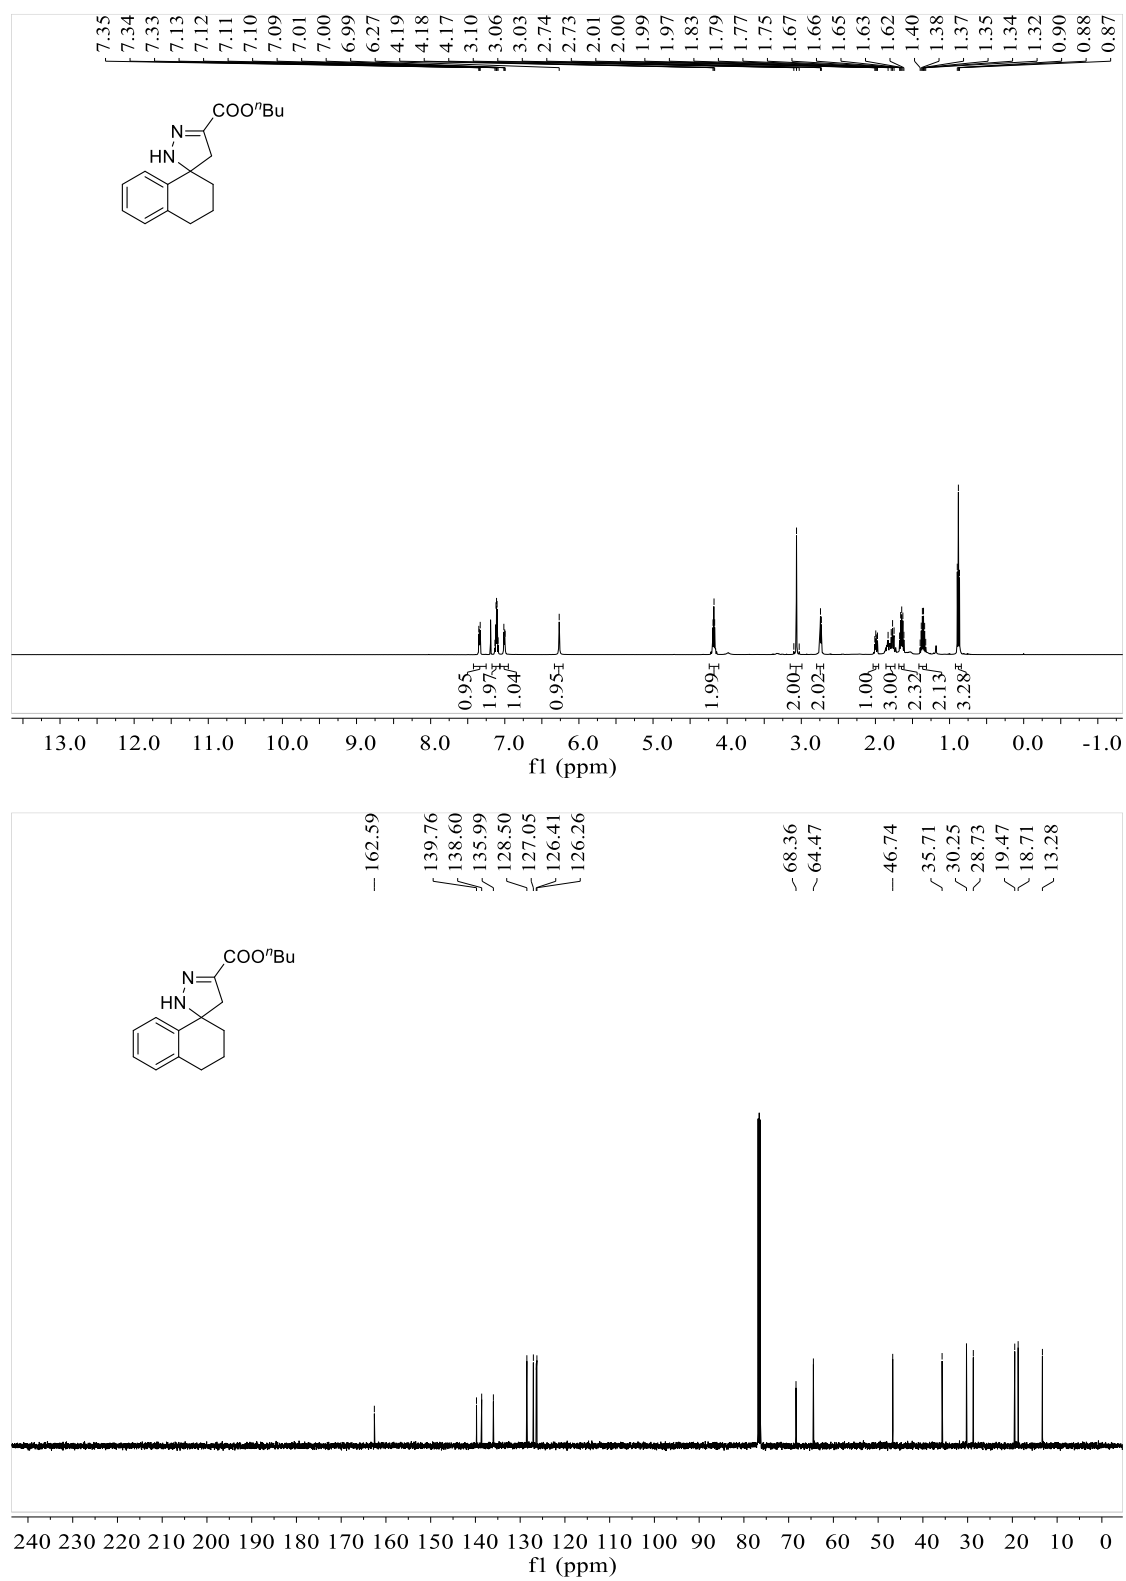

**<sup>1</sup>H NMR (500 MHz, CD<sub>3</sub>OD) and <sup>13</sup>C NMR (126 MHz, CD<sub>3</sub>OD) spectra for **2d**:**

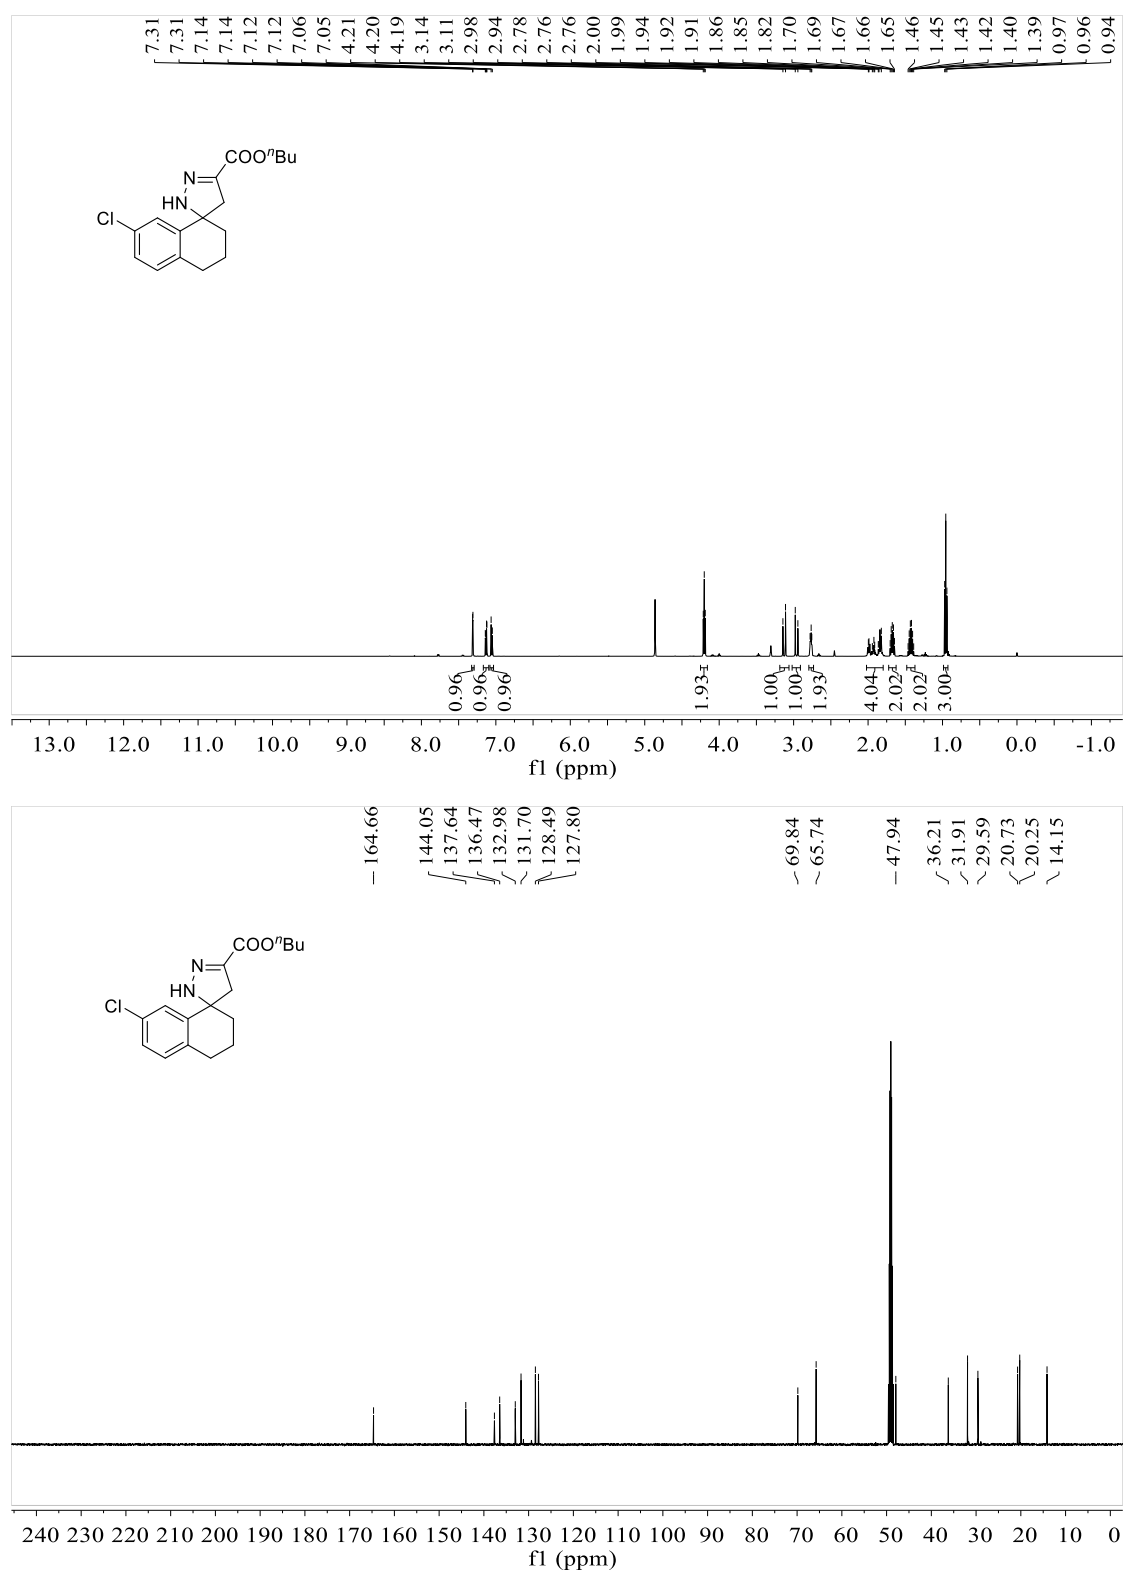

**<sup>1</sup>H NMR (500 MHz, CDCl<sub>3</sub>) and <sup>13</sup>C NMR (126 MHz, CDCl<sub>3</sub>) spectra for **3d**:**

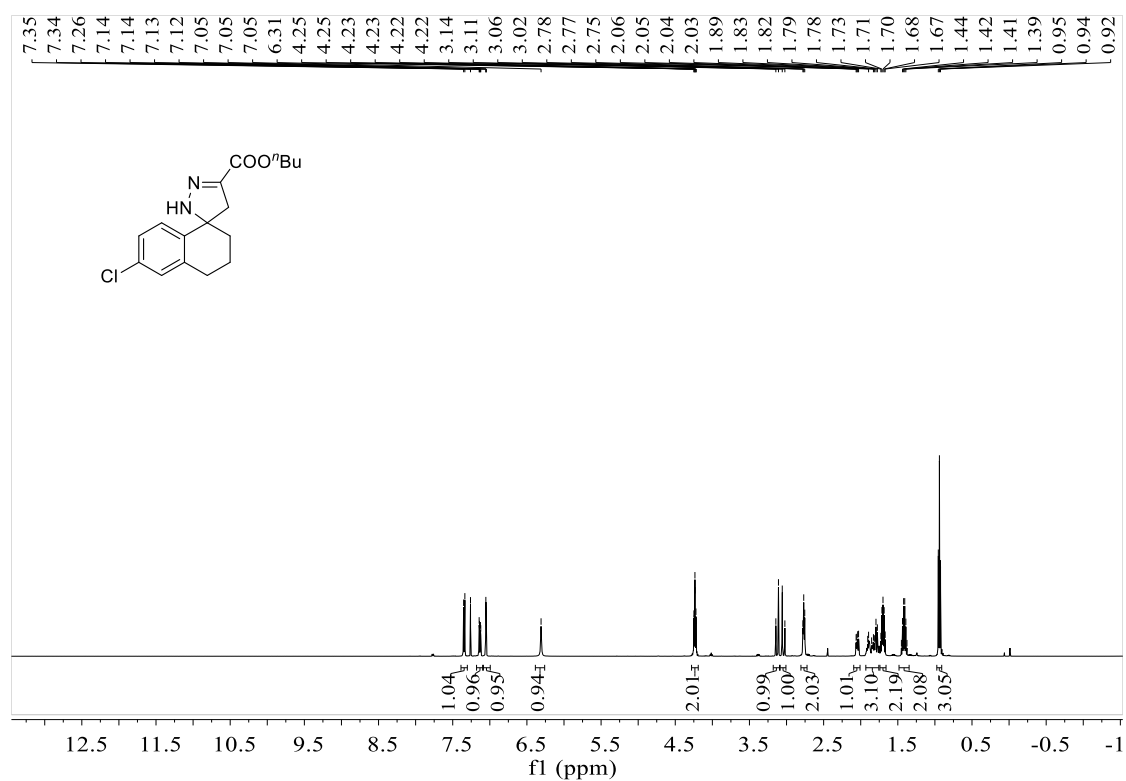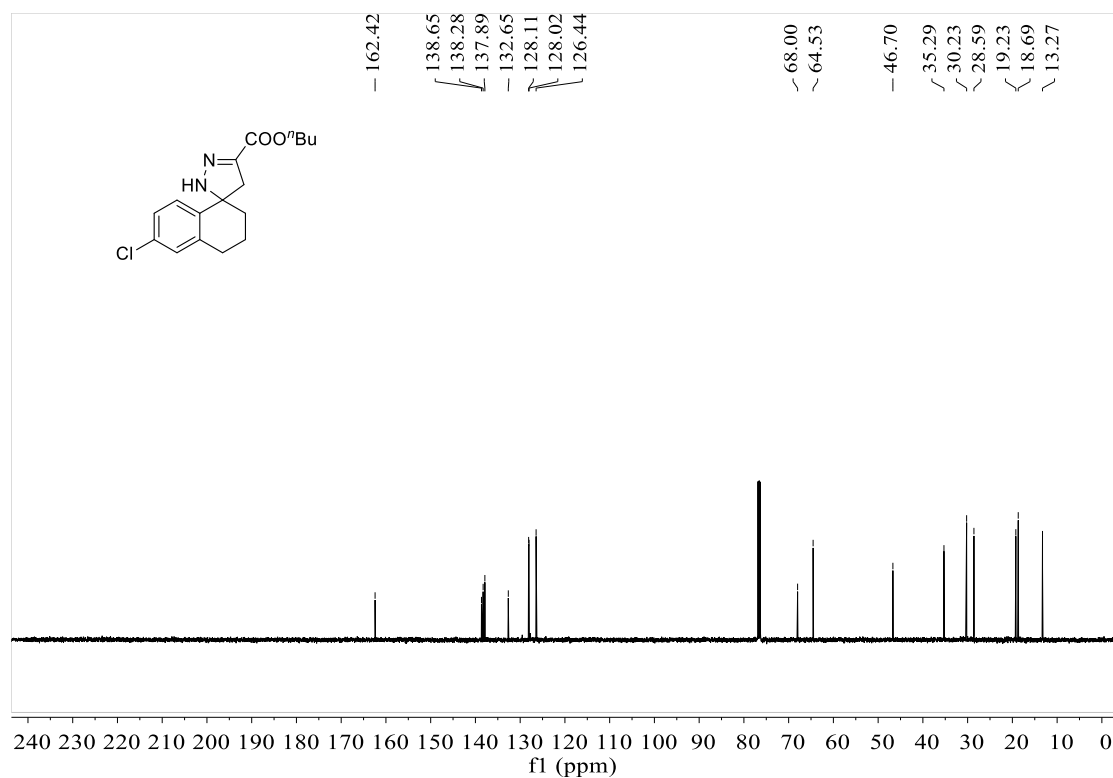

**$^1\text{H}$  NMR (500 MHz,  $\text{CD}_3\text{OD}$ ) and  $^{13}\text{C}$  NMR (126 MHz,  $\text{CD}_3\text{OD}$ ) spectra for **4d**:**

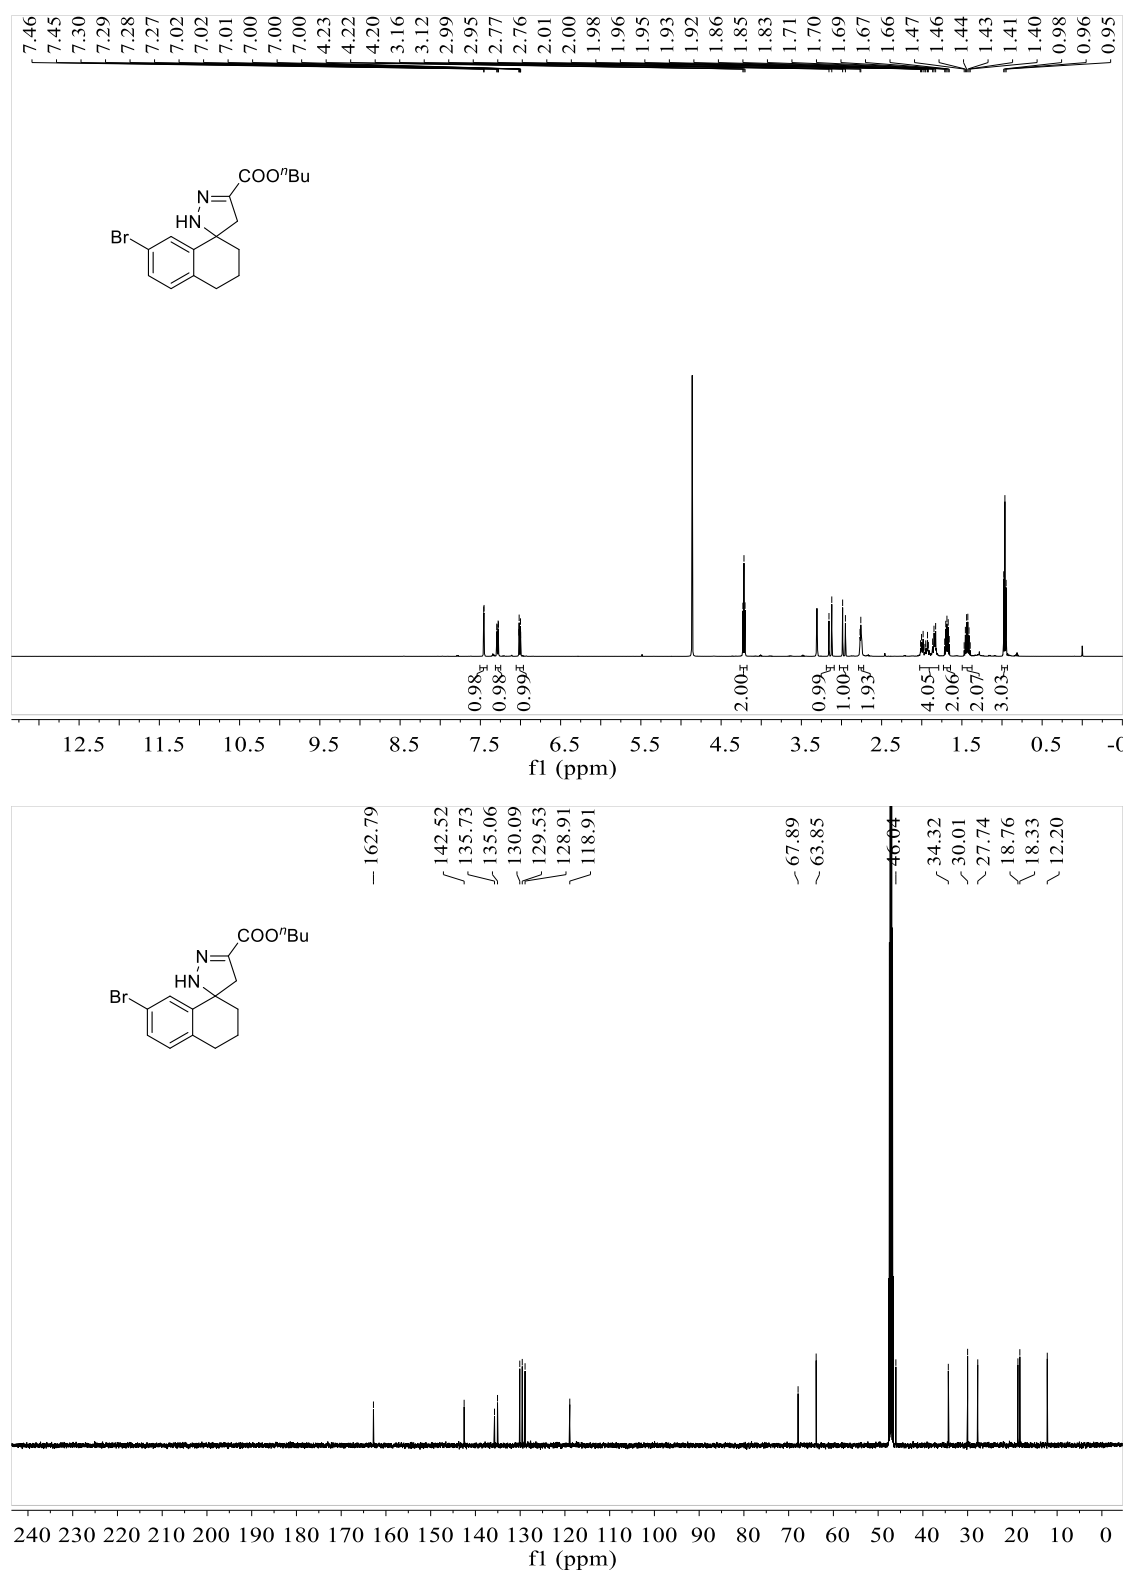



**<sup>1</sup>H NMR (500 MHz, CD<sub>3</sub>OD) and <sup>13</sup>C NMR (126 MHz, CD<sub>3</sub>OD) spectra for **5d**:**

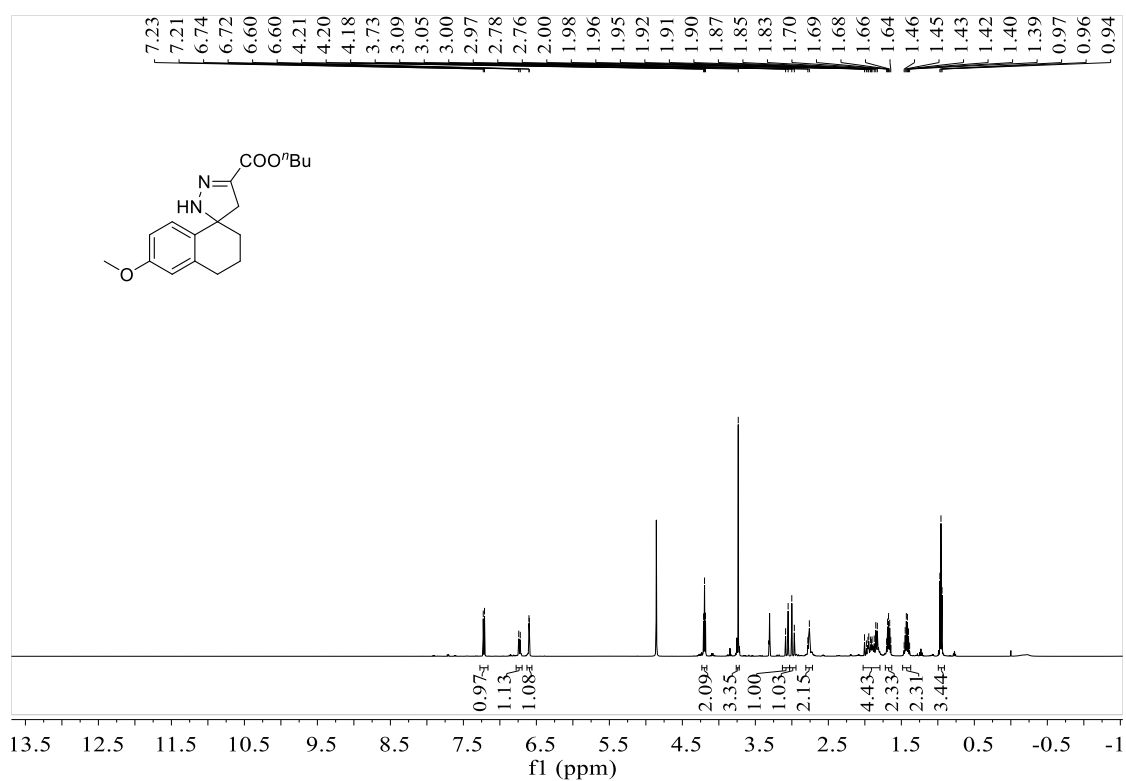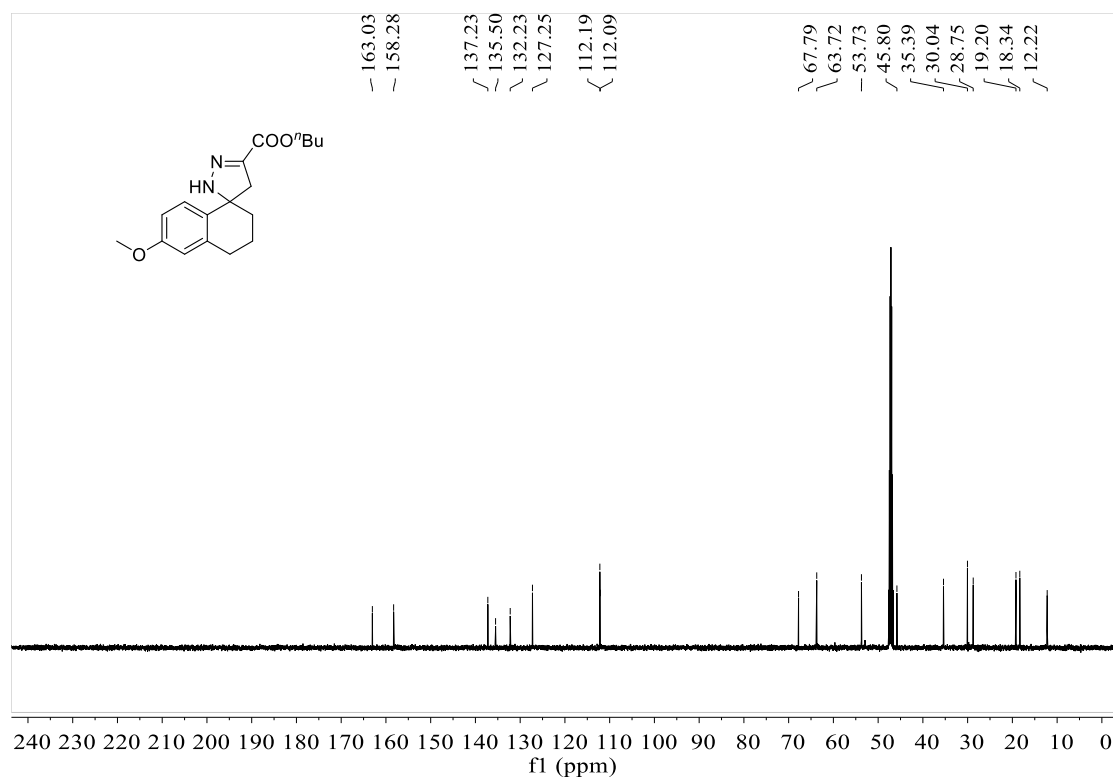

**<sup>1</sup>H NMR (500 MHz, CD<sub>3</sub>OD) and <sup>13</sup>C NMR (126 MHz, CD<sub>3</sub>OD) spectra for **6d**:**

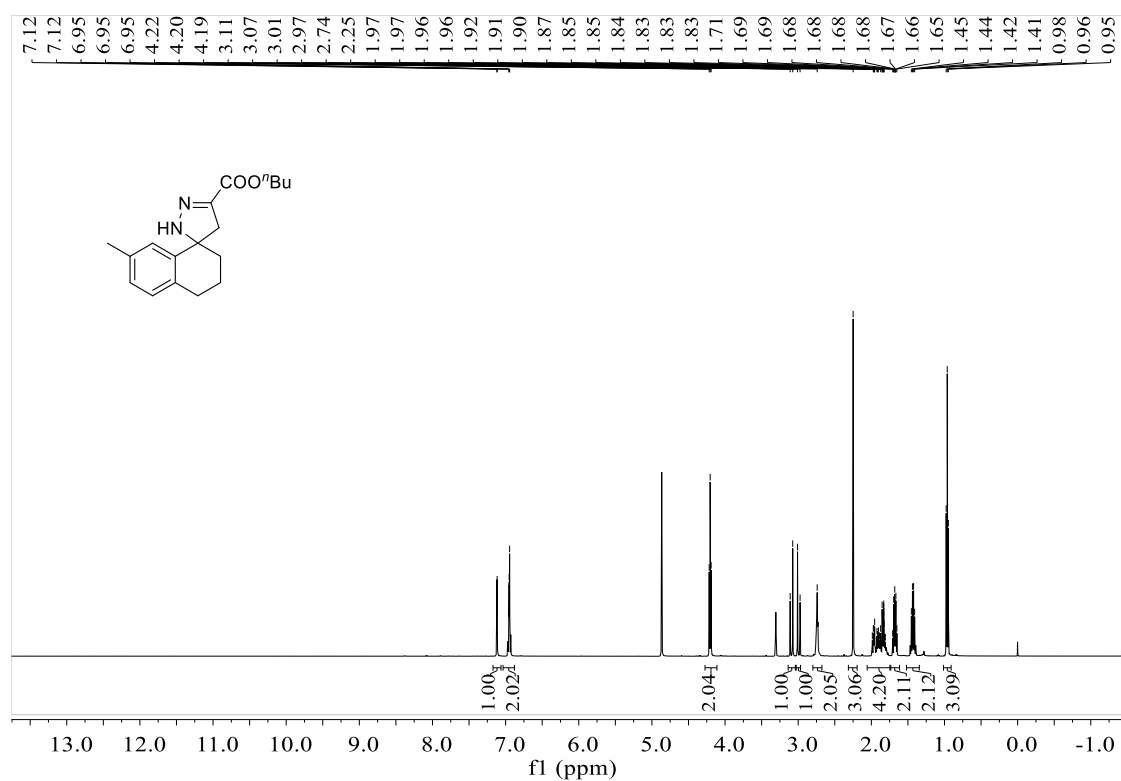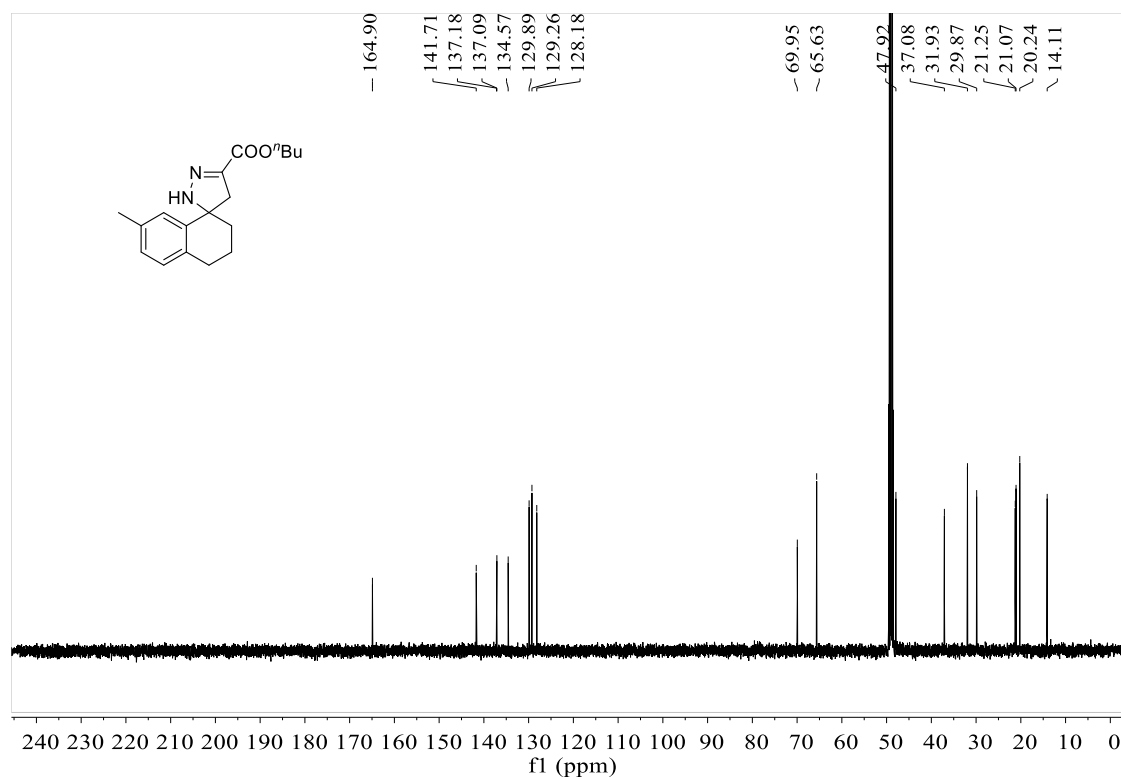

**<sup>1</sup>H NMR (500 MHz, CD<sub>3</sub>OD) and <sup>13</sup>C NMR (126 MHz, CD<sub>3</sub>OD) spectra for **7d**:**

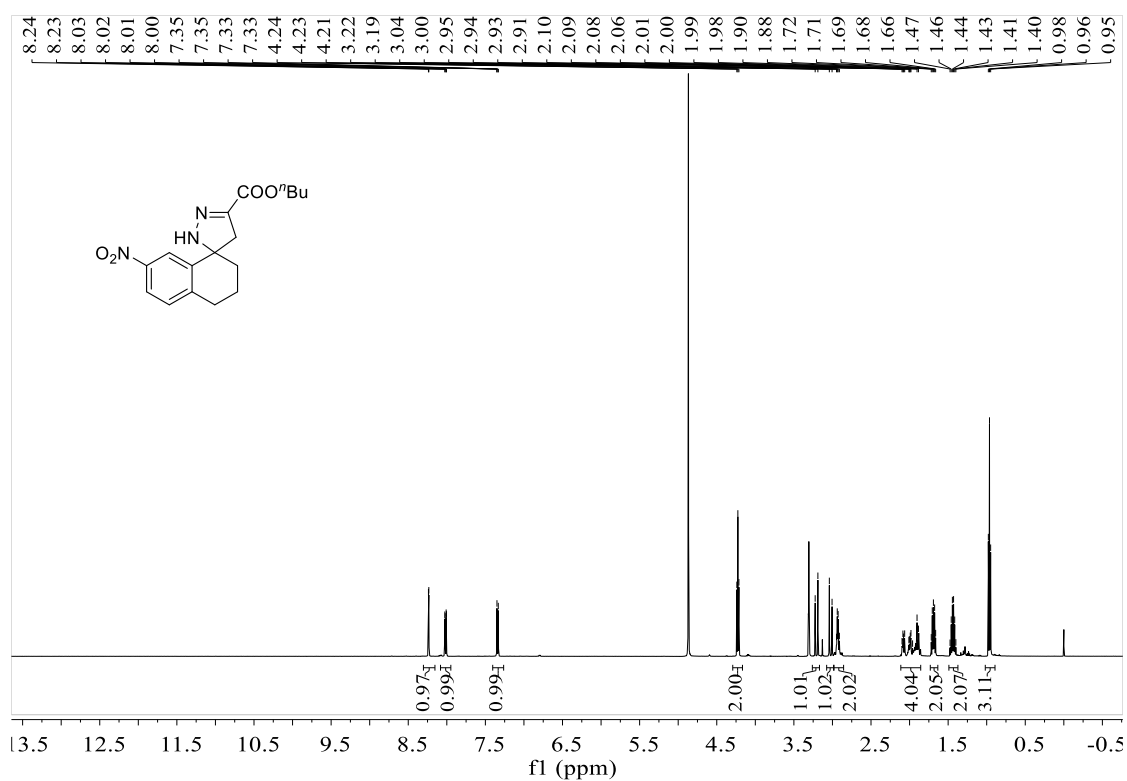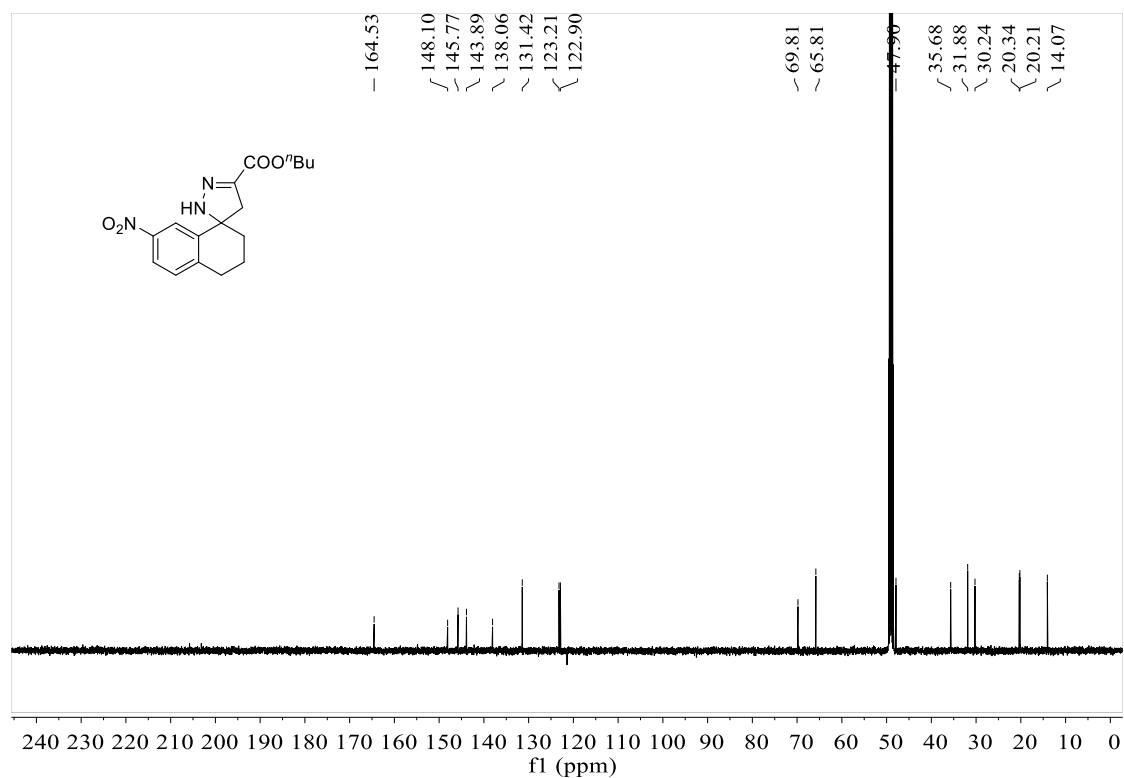

**$^1\text{H}$  NMR (500 MHz,  $\text{CD}_3\text{OD}$ ) and  $^{13}\text{C}$  NMR (126 MHz,  $\text{CD}_3\text{OD}$ ) spectra for **8d**:**

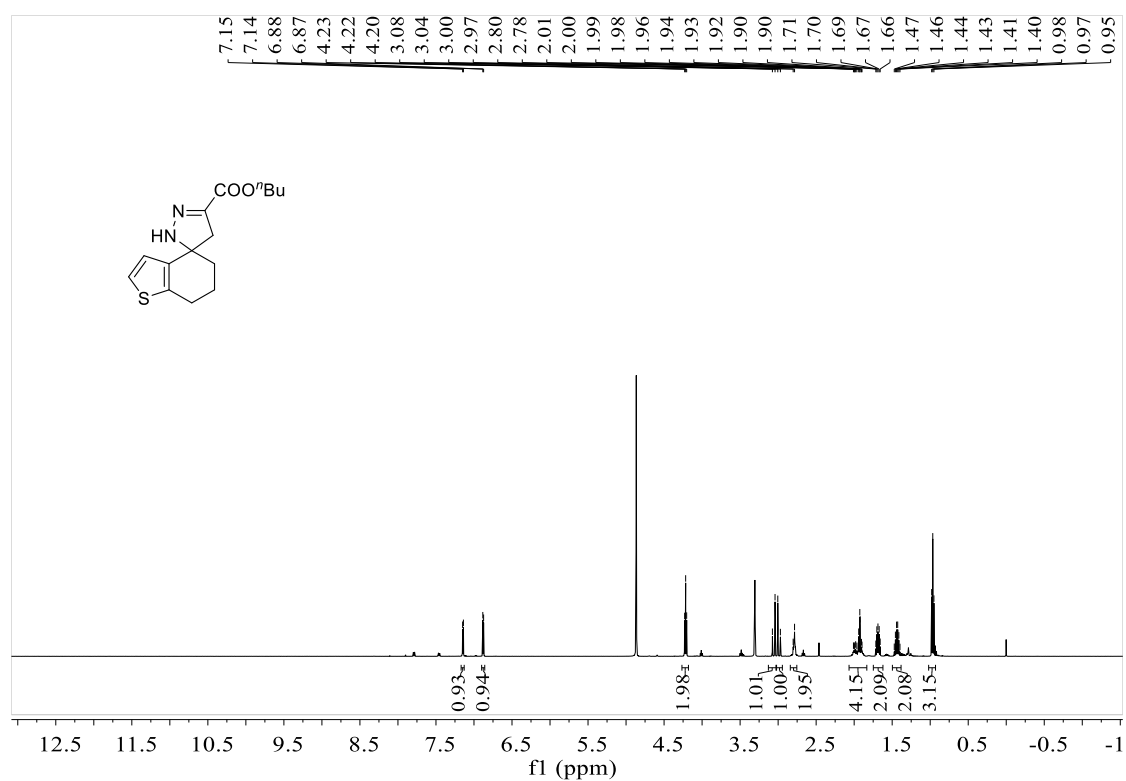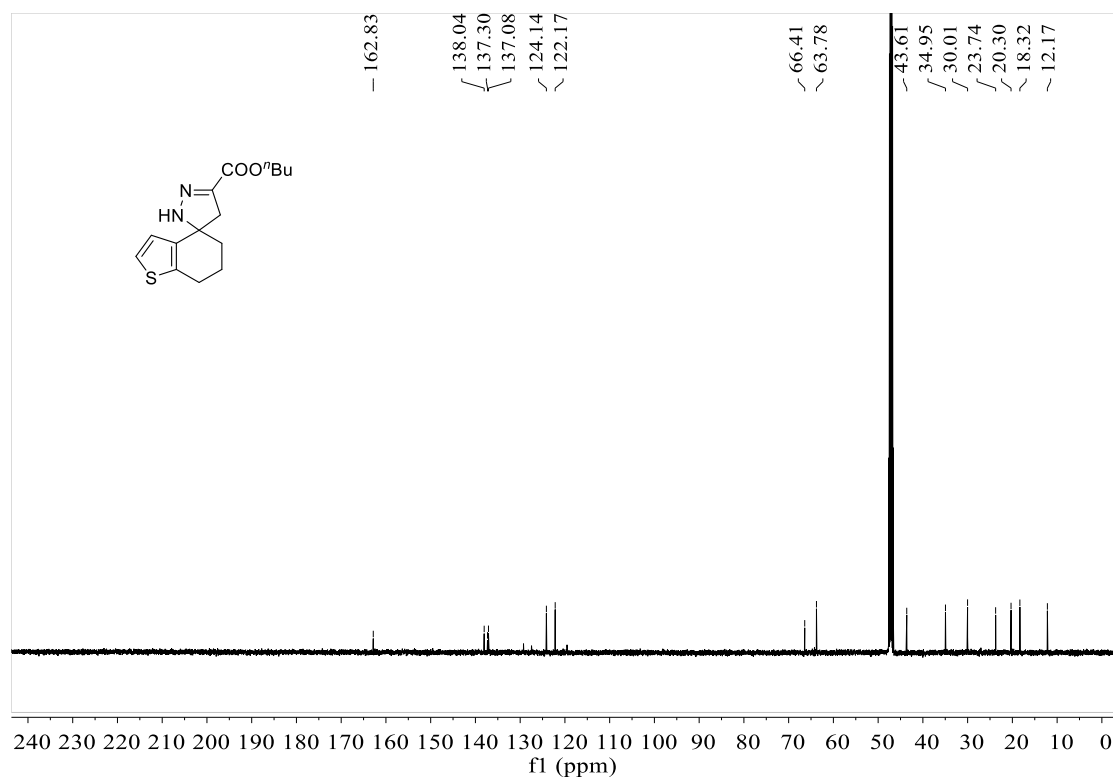

**<sup>1</sup>H NMR (500 MHz, CD<sub>3</sub>OD) and <sup>13</sup>C NMR (126 MHz, CD<sub>3</sub>OD) spectra for **9d**:**

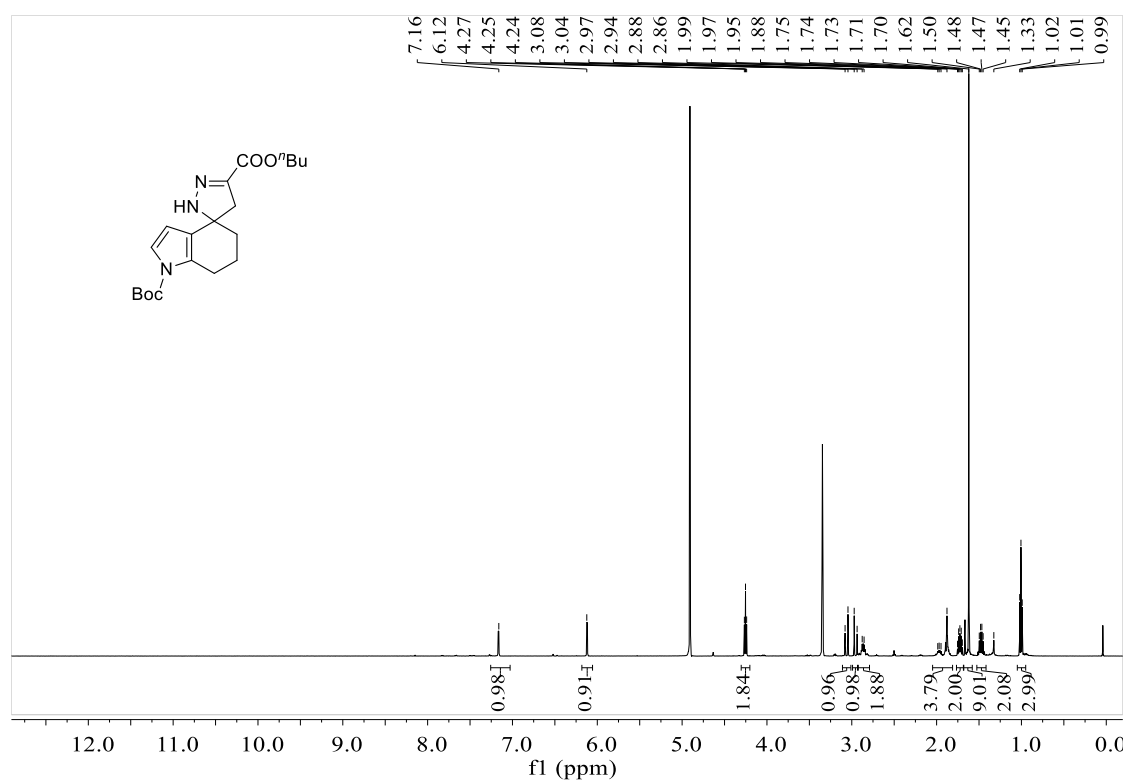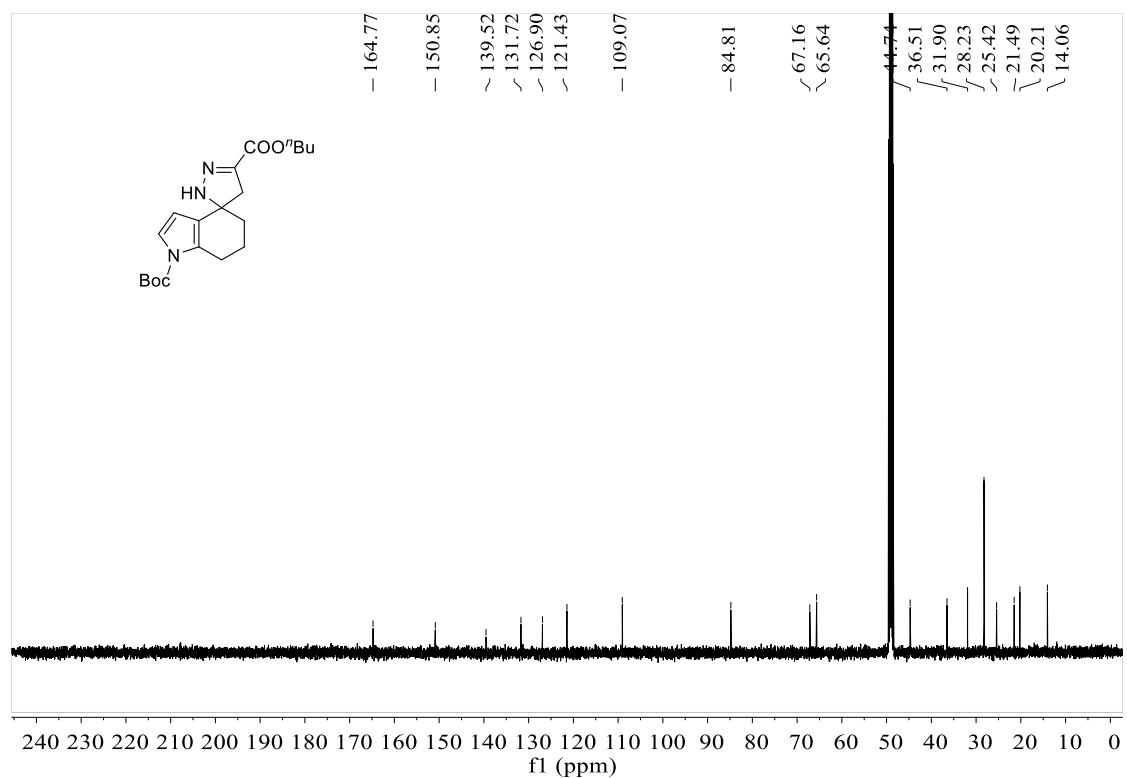

**$^1\text{H}$  NMR (500 MHz,  $\text{CD}_3\text{OD}$ ) and  $^{13}\text{C}$  NMR (126 MHz,  $\text{CD}_3\text{OD}$ ) spectra for **10d**:**

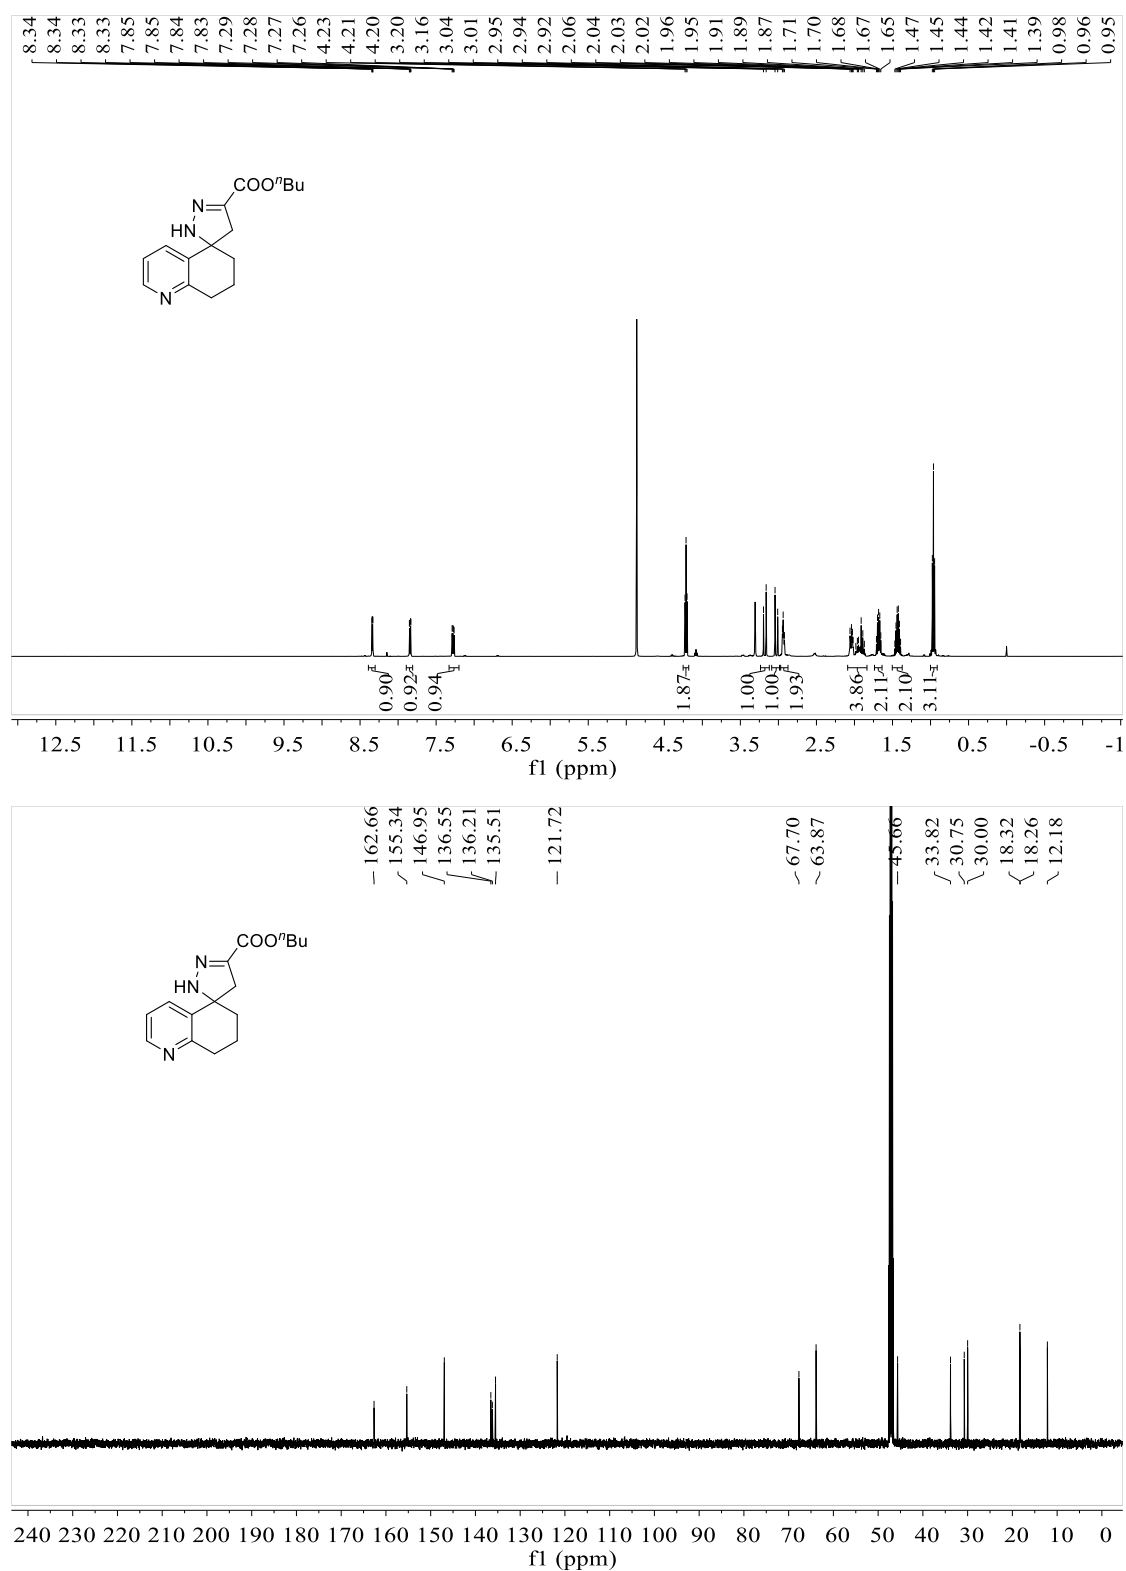

**<sup>1</sup>H NMR (500 MHz, CD<sub>3</sub>OD) and <sup>13</sup>C NMR (126 MHz, CD<sub>3</sub>OD) spectra for **11d**:**

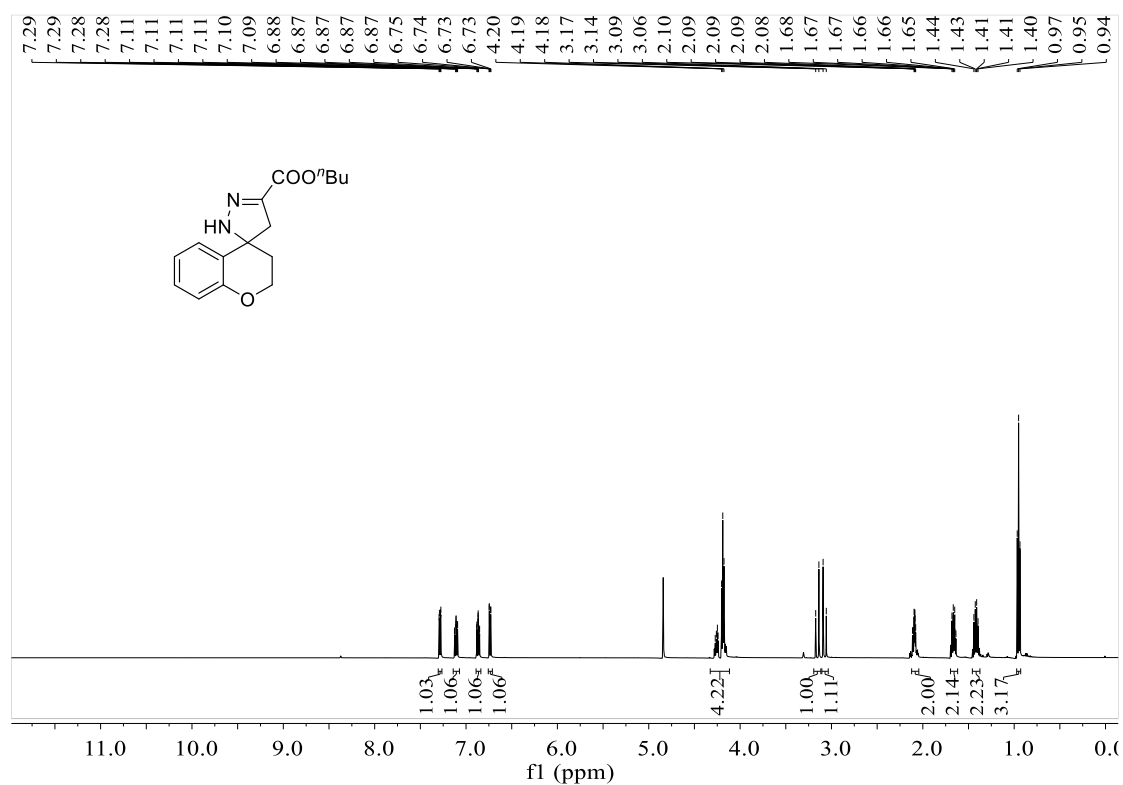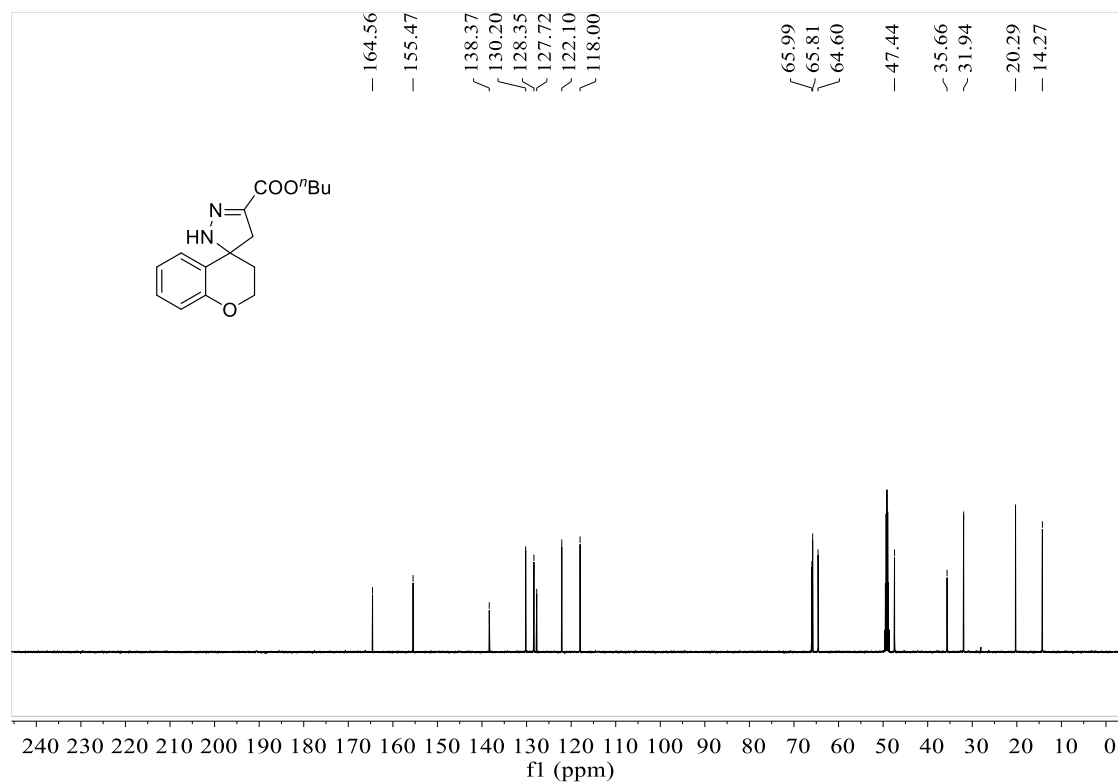

**$^1\text{H}$  NMR (500 MHz,  $\text{CD}_3\text{OD}$ ) and  $^{13}\text{C}$  NMR (126 MHz,  $\text{CD}_3\text{OD}$ ) spectra for **12d**:**

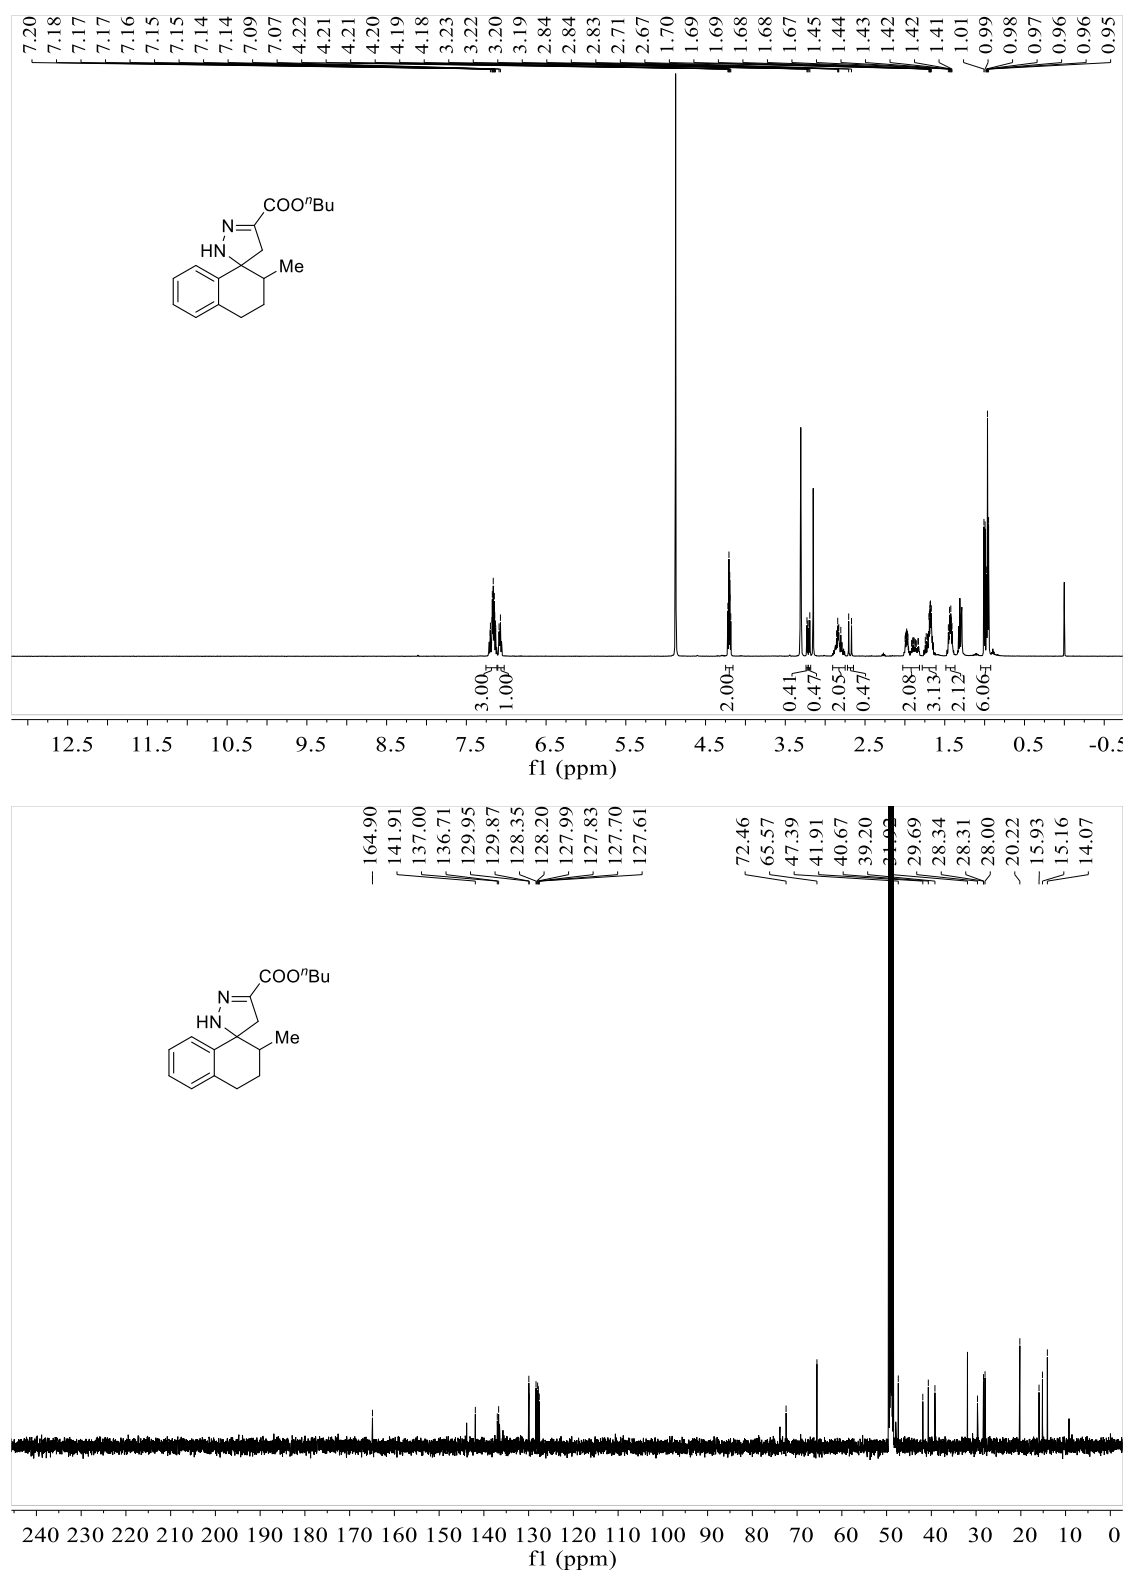



**$^1\text{H}$  NMR (500 MHz,  $\text{CD}_3\text{OD}$ ) and  $^{13}\text{C}$  NMR (126 MHz,  $\text{CD}_3\text{OD}$ ) spectra for **13d**:**

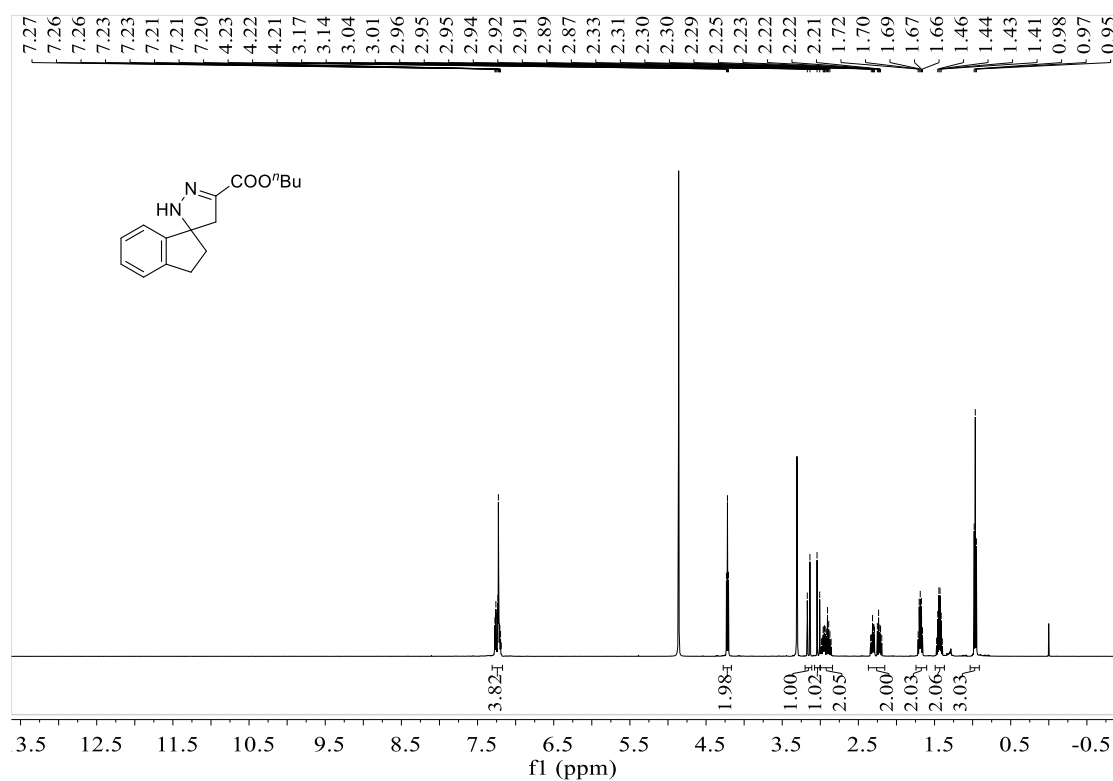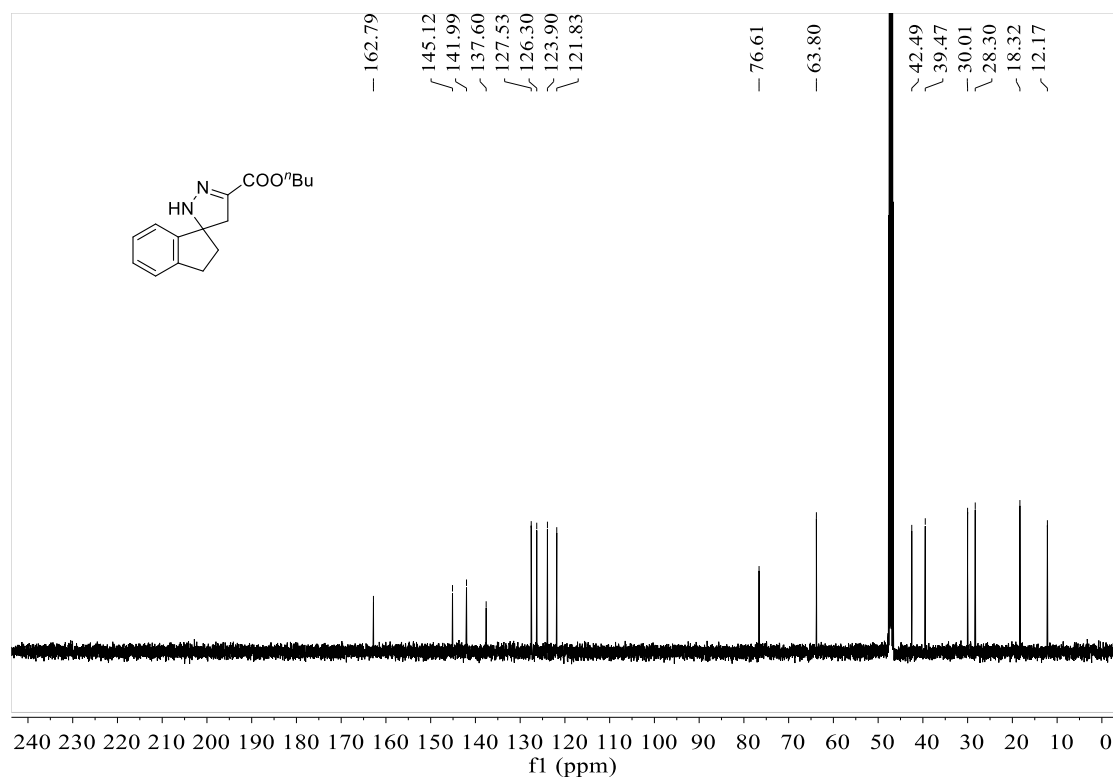

$^1\text{H}$  NMR (500 MHz,  $\text{CD}_3\text{OD}$ ) and  $^{13}\text{C}$  NMR (126 MHz,  $\text{CD}_3\text{OD}$ ) and  $^{19}\text{F}$  NMR (282 MHz,  $\text{CD}_3\text{OD}$ ) spectra for **14d**:

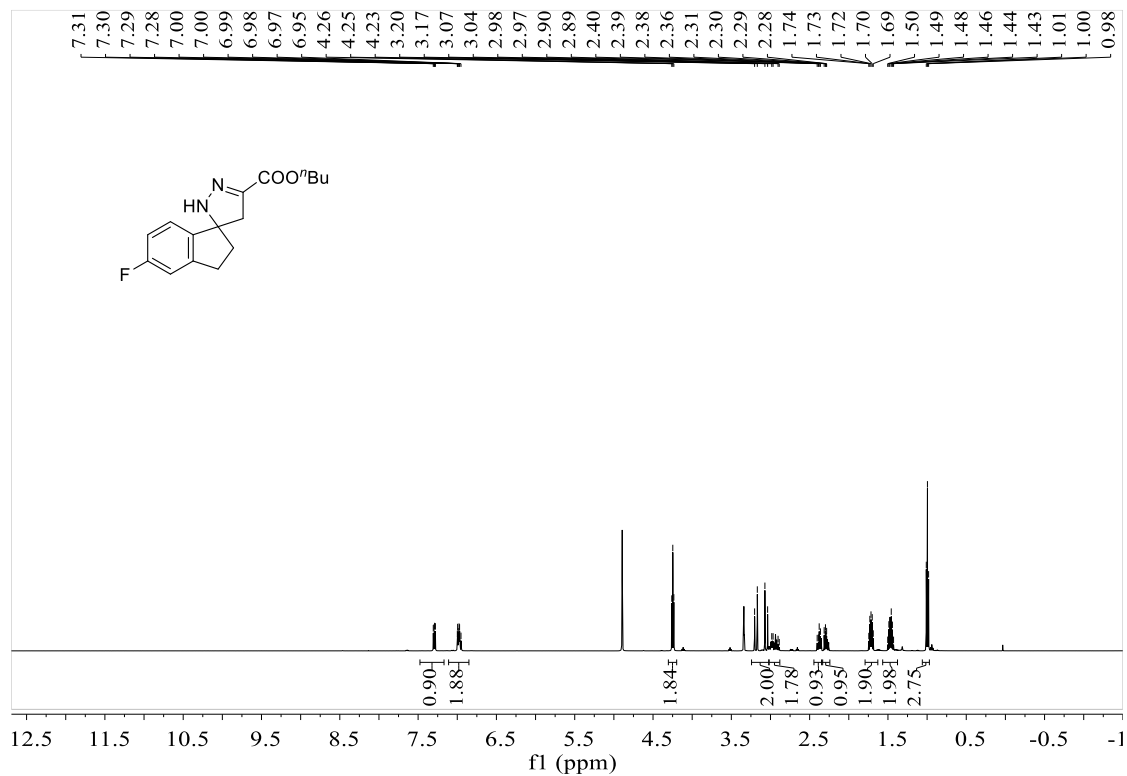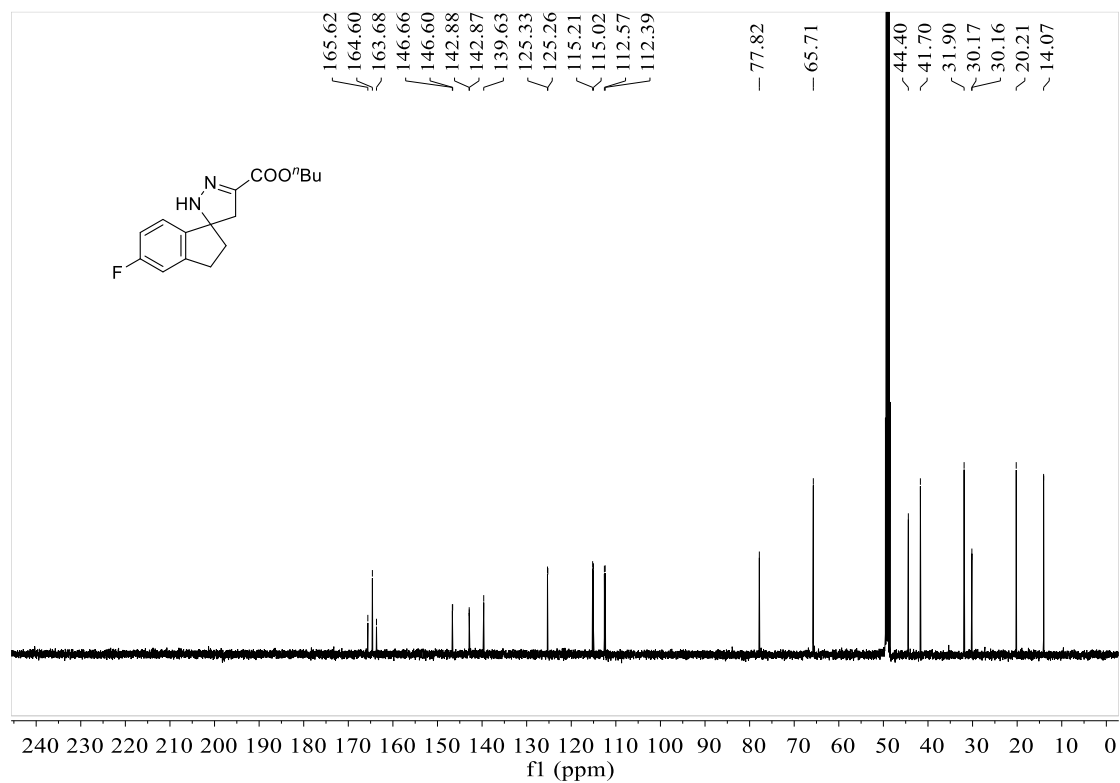

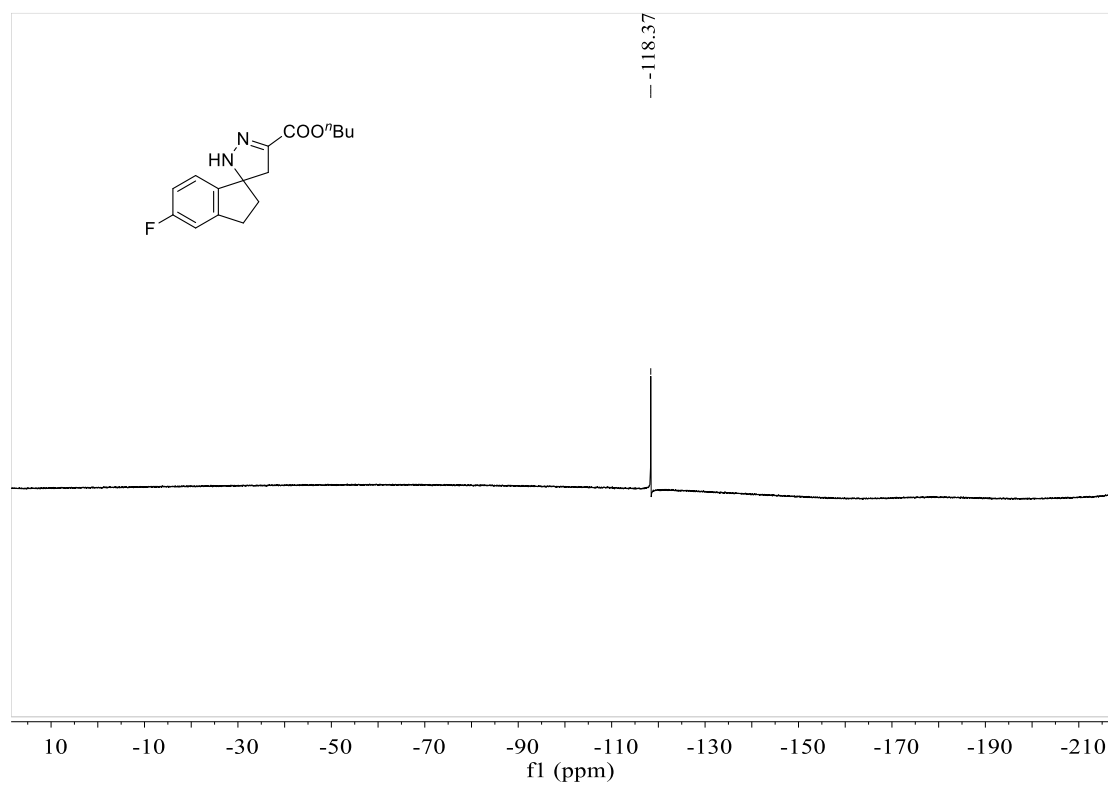

**<sup>1</sup>H NMR (500 MHz, CD<sub>3</sub>OD) and <sup>13</sup>C NMR (126 MHz, CD<sub>3</sub>OD) spectra for **15d**:**

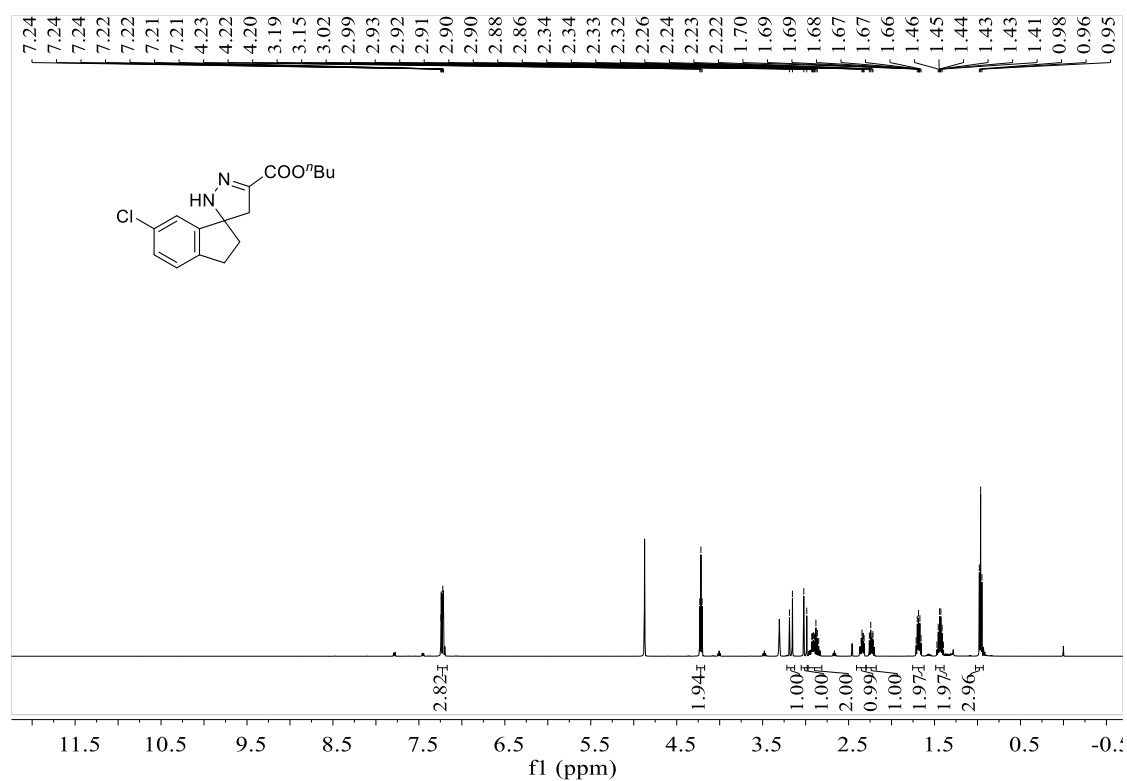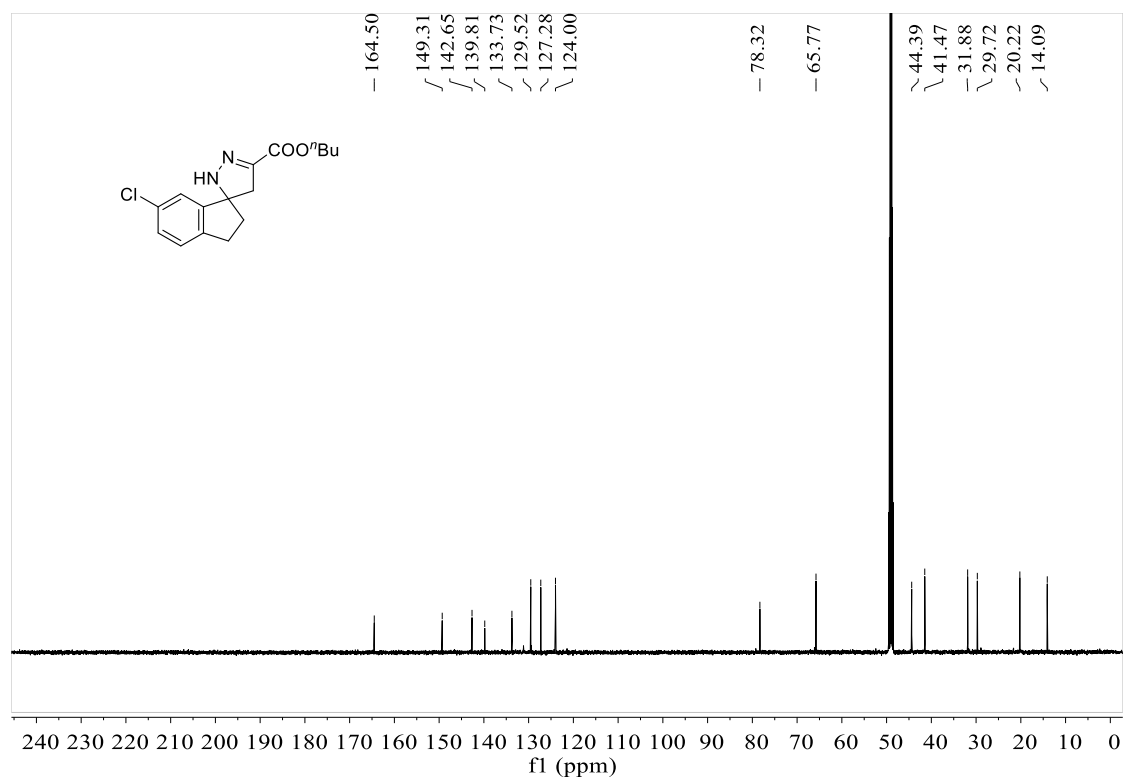

**<sup>1</sup>H NMR (500 MHz, CD<sub>3</sub>OD) and <sup>13</sup>C NMR (126 MHz, CD<sub>3</sub>OD) spectra for **16d**:**

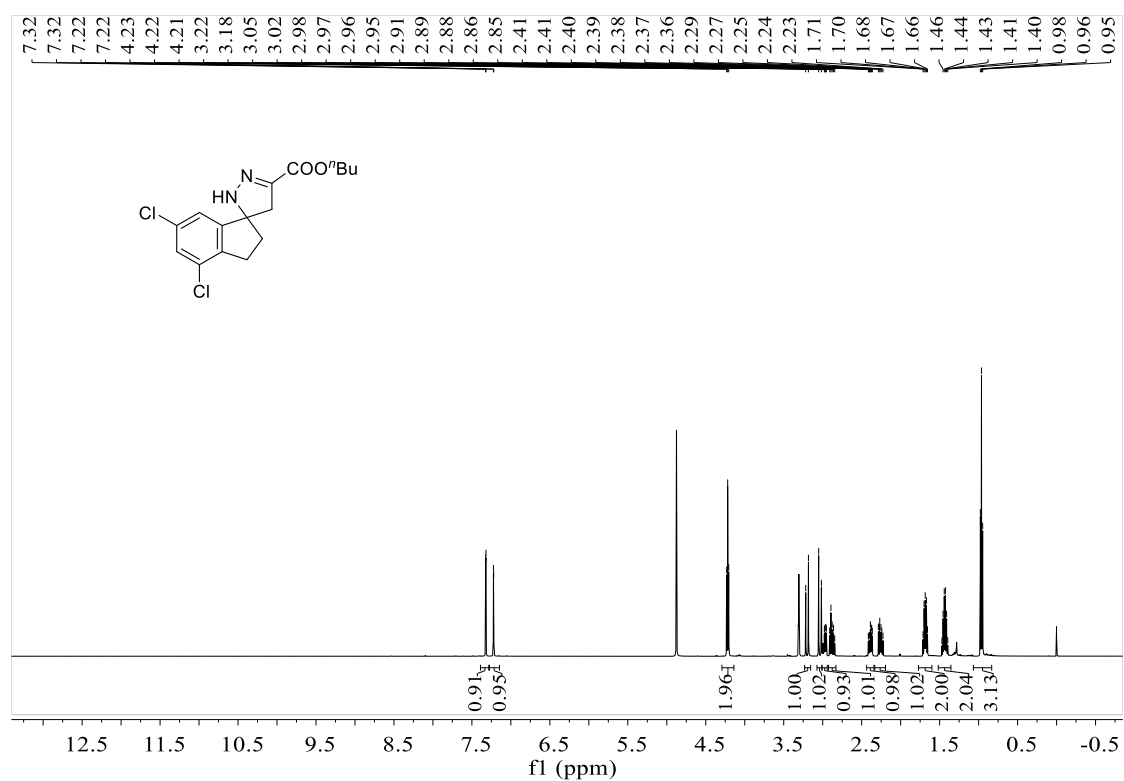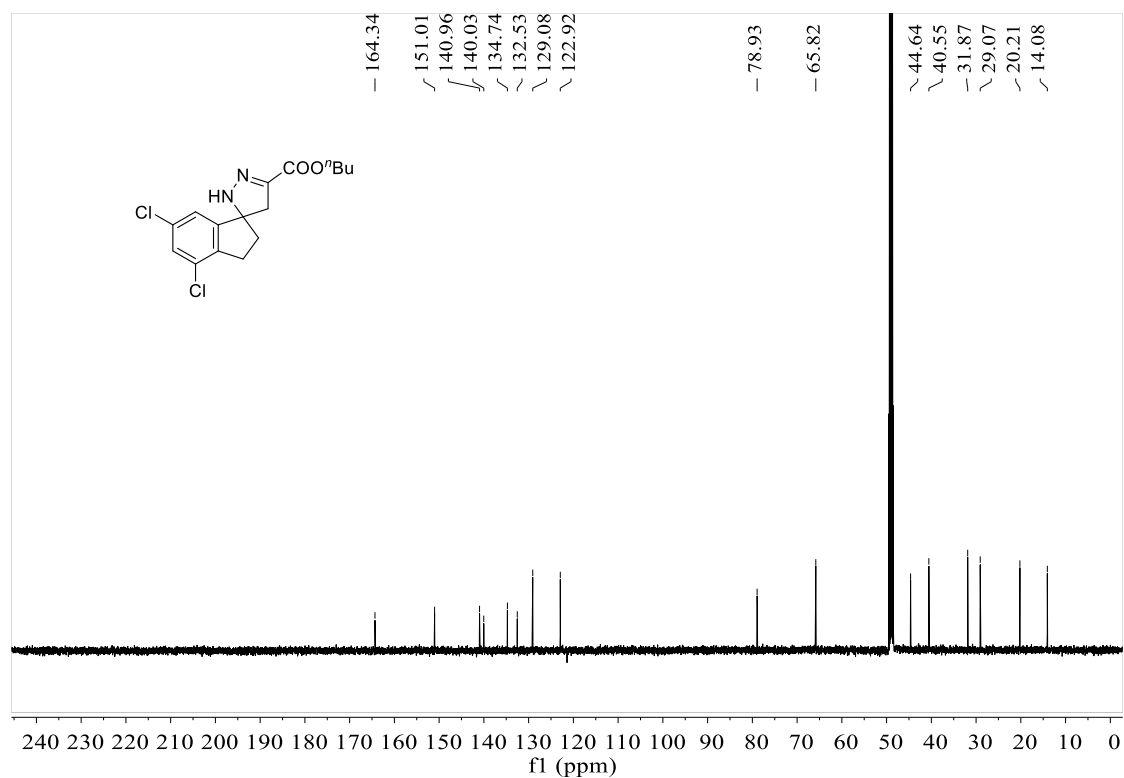

**<sup>1</sup>H NMR (500 MHz, CD<sub>3</sub>OD) and <sup>13</sup>C NMR (126 MHz, CD<sub>3</sub>OD) spectra for **17d**:**

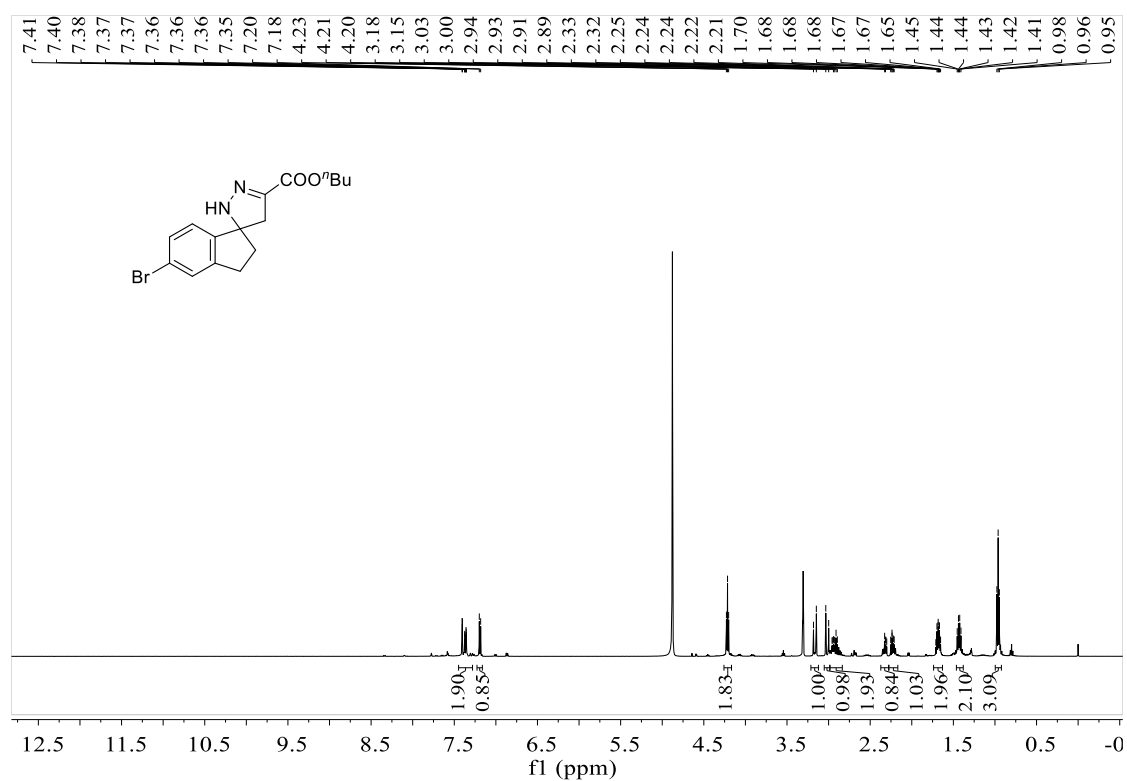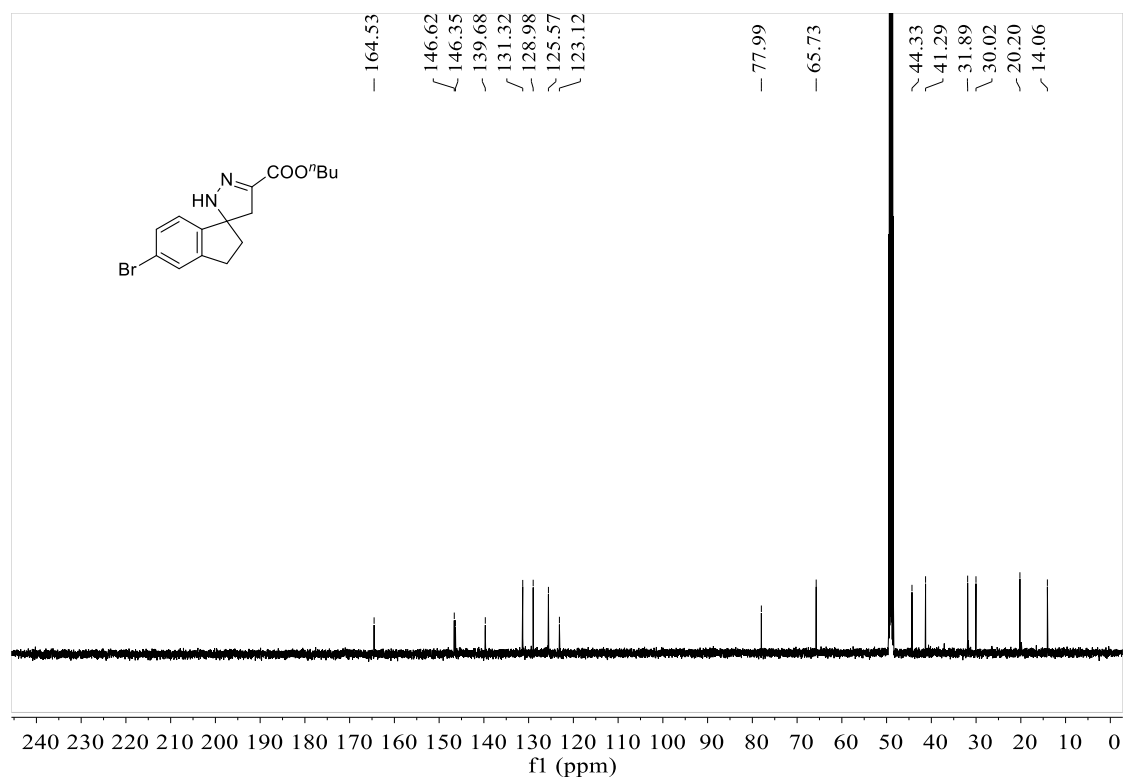

<sup>1</sup>H NMR (500 MHz, CD<sub>3</sub>OD) and <sup>13</sup>C NMR (126 MHz, CD<sub>3</sub>OD) spectra for **18d**:

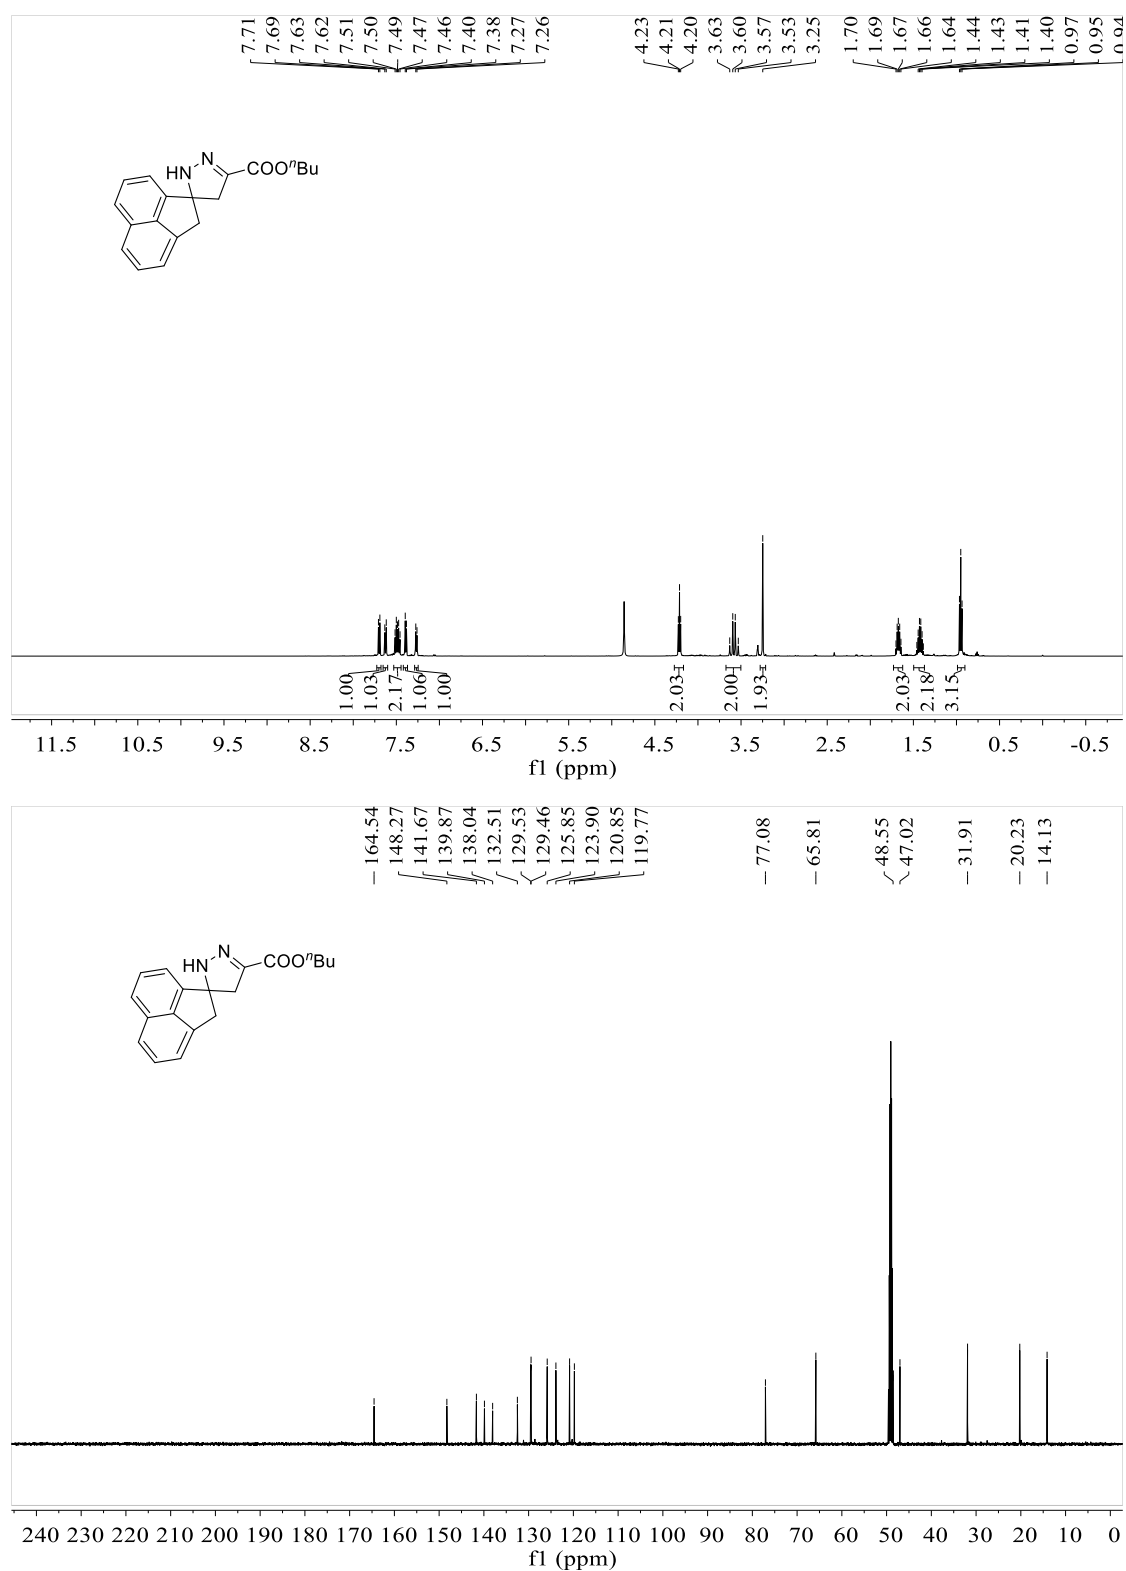

**<sup>1</sup>H NMR (500 MHz, CD<sub>3</sub>OD) and <sup>13</sup>C NMR (126 MHz, CD<sub>3</sub>OD) spectra for 19d:**

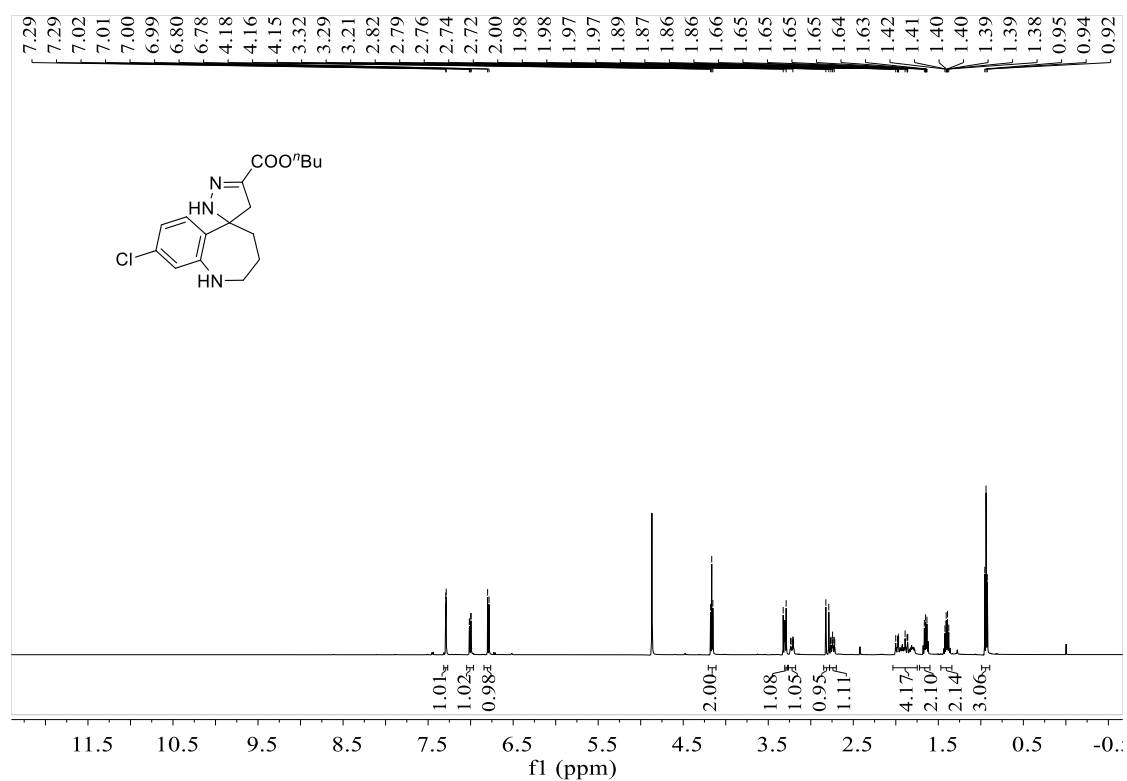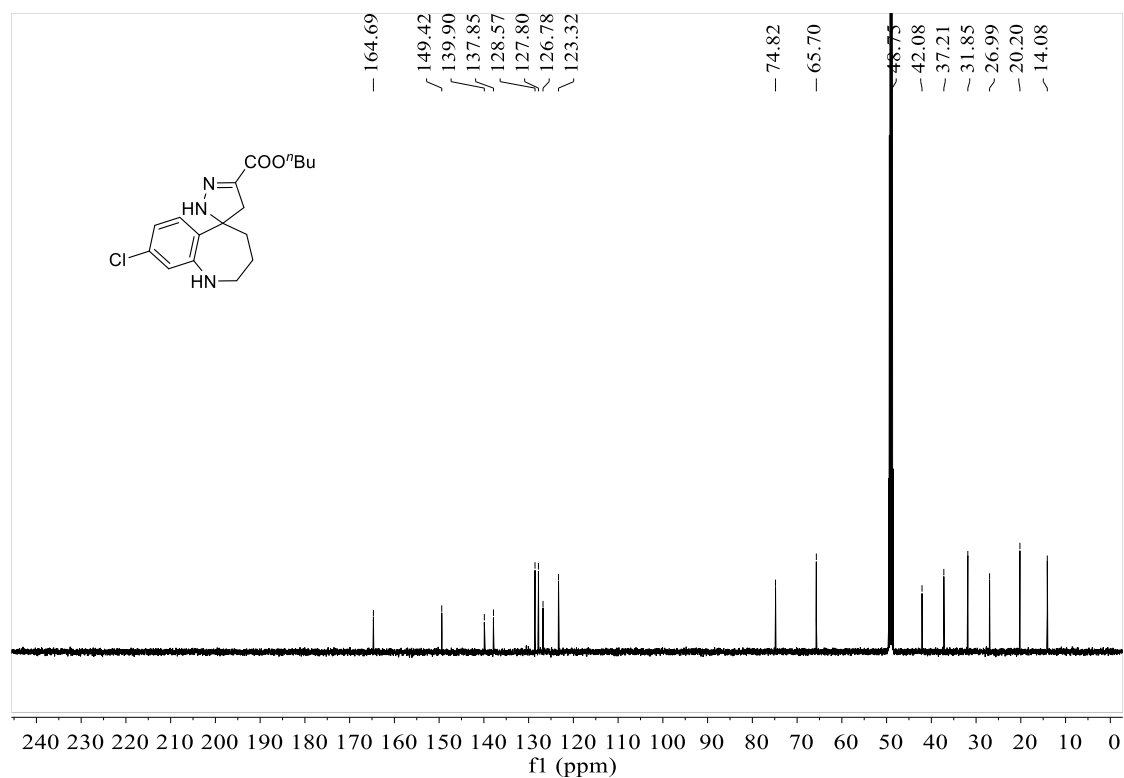



<sup>1</sup>H NMR (500 MHz, CDCl<sub>3</sub>) and <sup>13</sup>C NMR (126 MHz, CDCl<sub>3</sub>) spectra for **20d**:

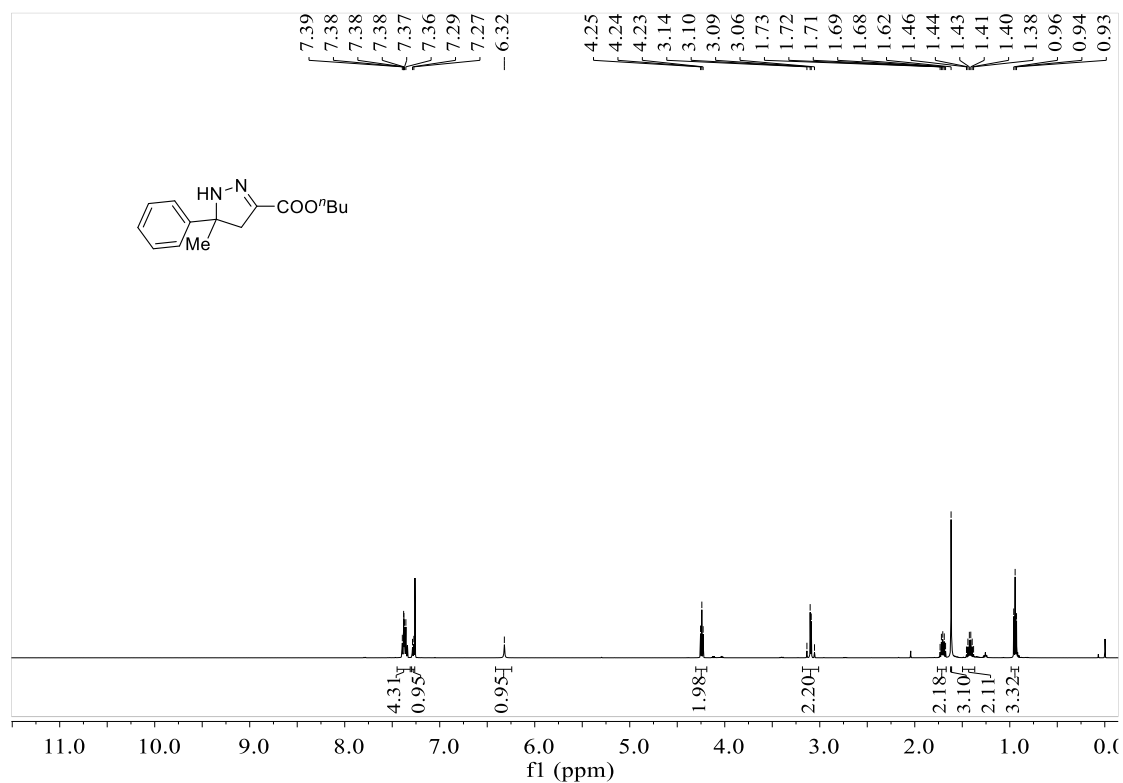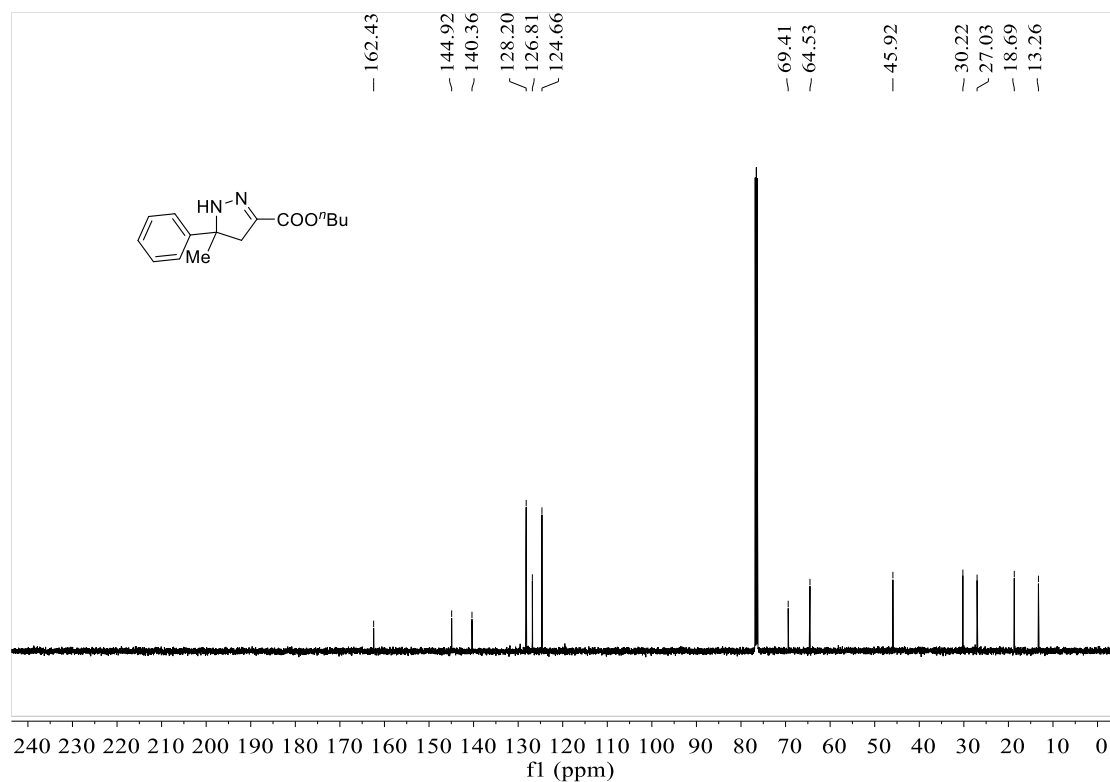

**<sup>1</sup>H NMR (500 MHz, CD<sub>3</sub>OD) and <sup>13</sup>C NMR (126 MHz, CD<sub>3</sub>OD) spectra for 21d:**

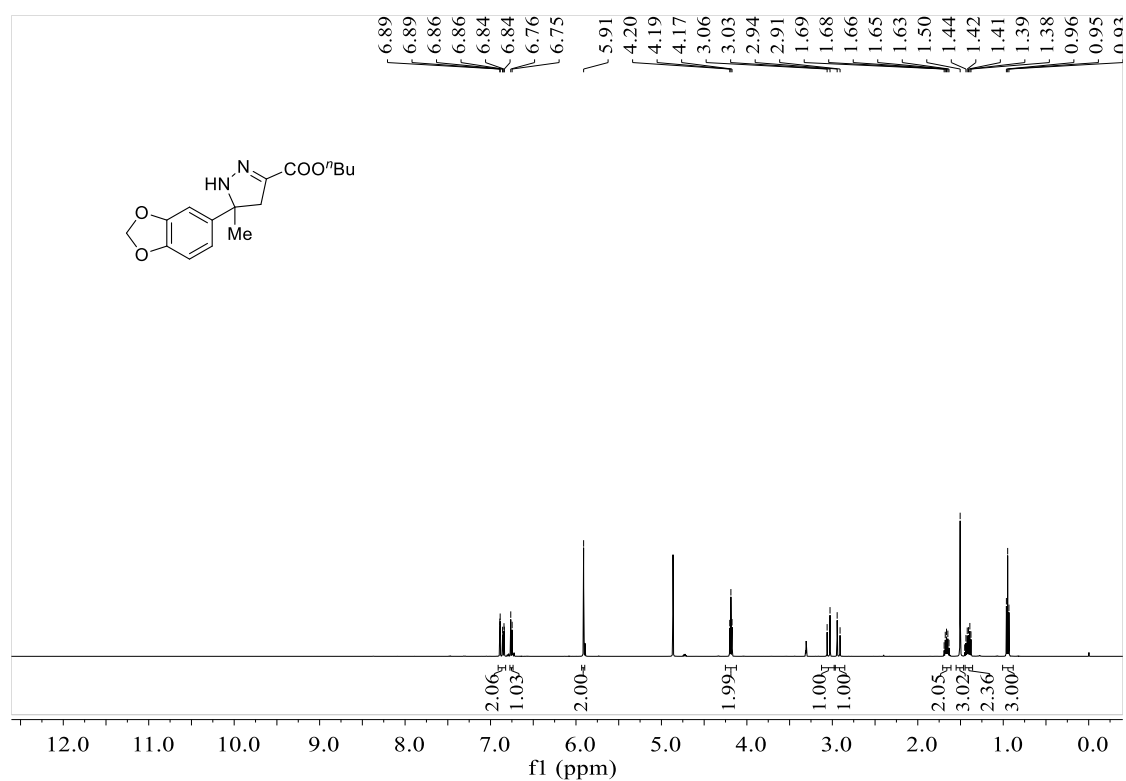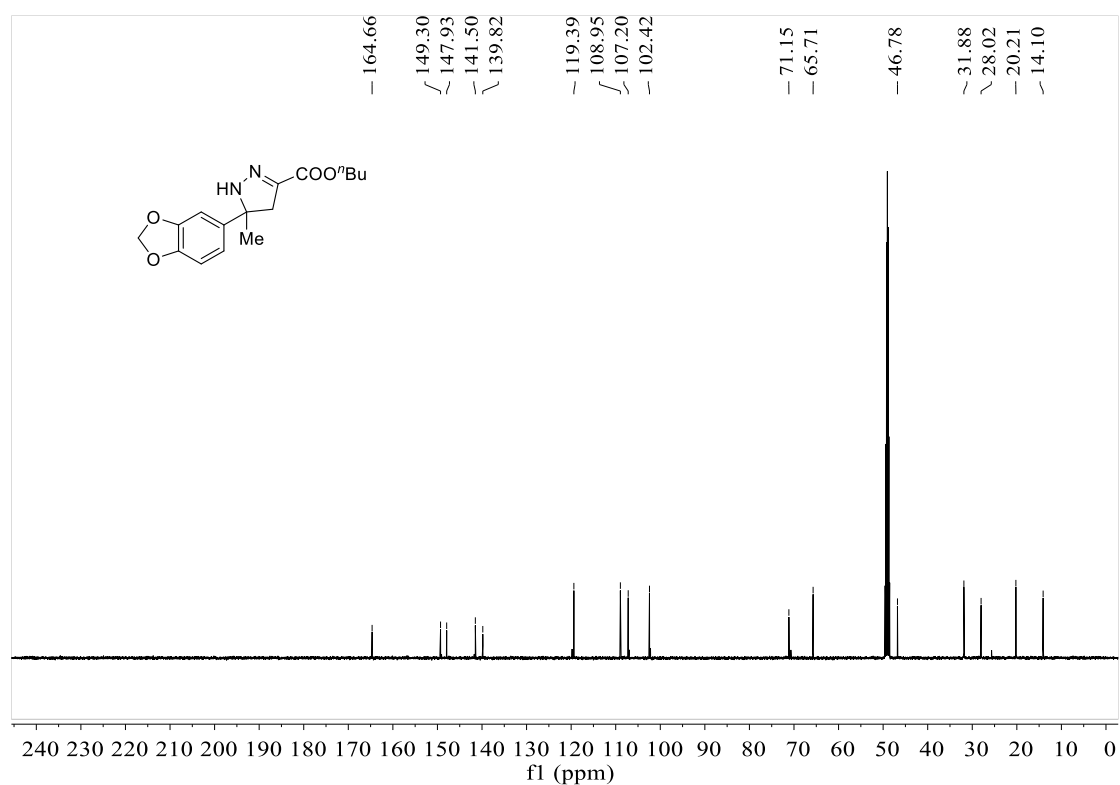

**<sup>1</sup>H NMR (500 MHz, CD<sub>3</sub>OD) and <sup>13</sup>C NMR (126 MHz, CD<sub>3</sub>OD) spectra for **22d**:**

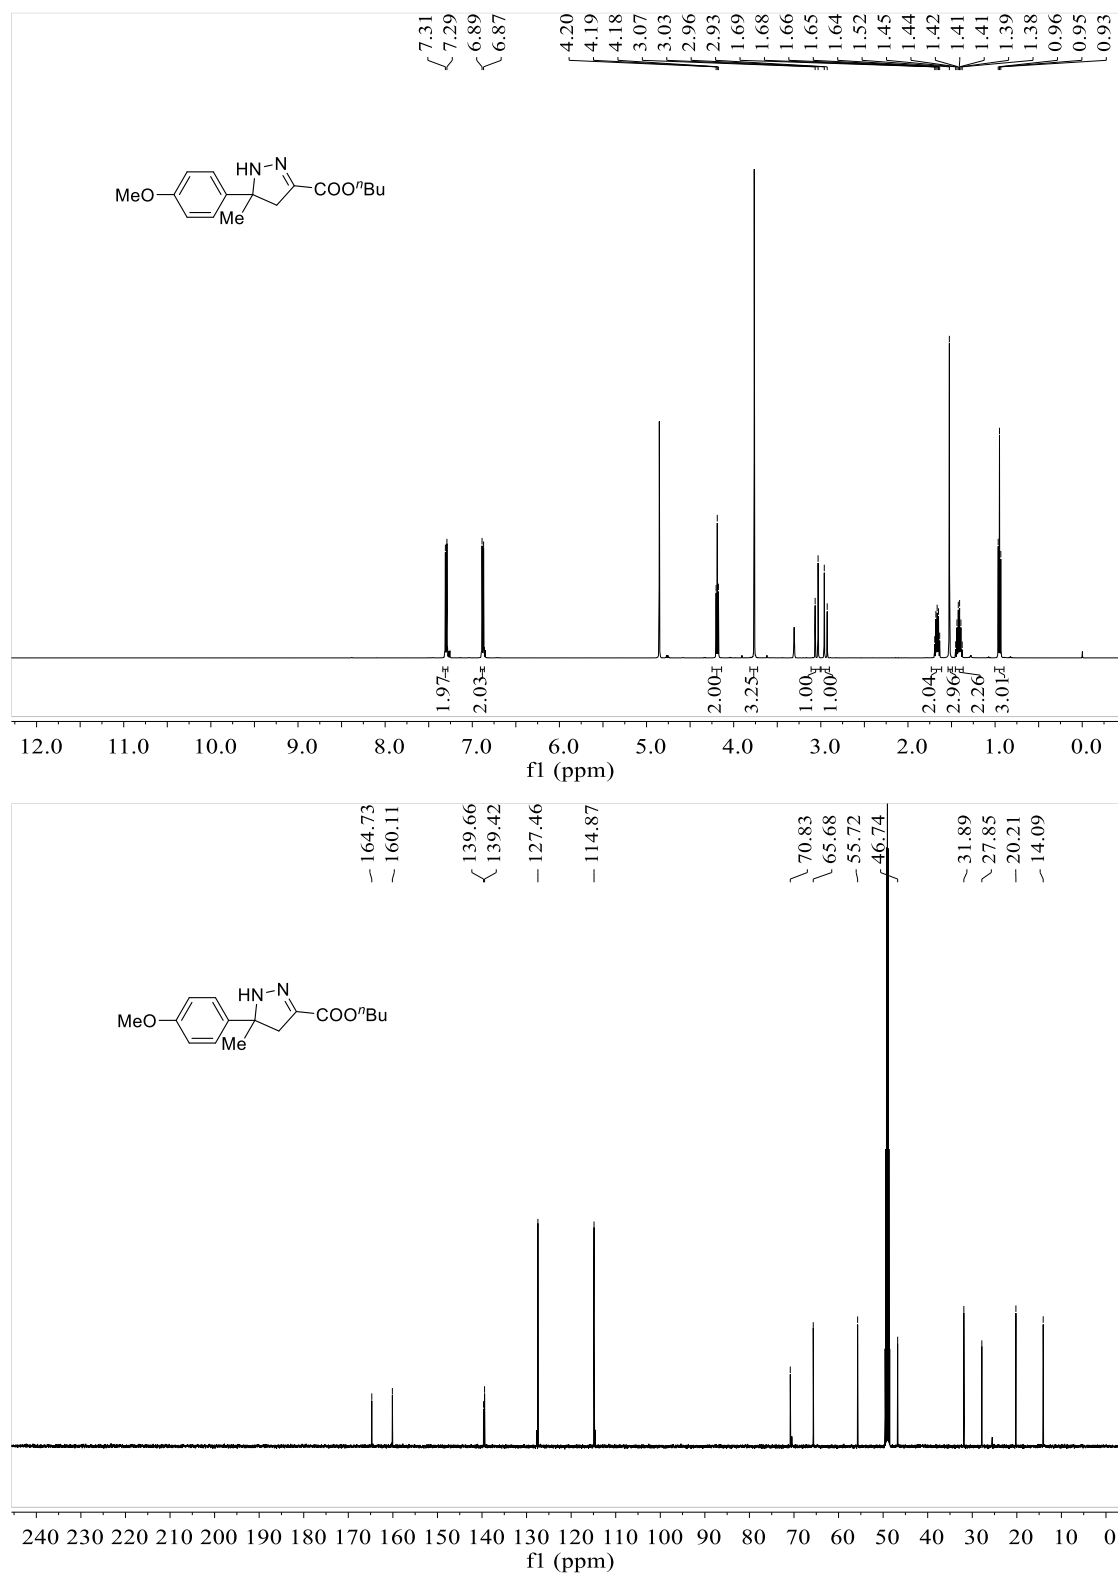

**<sup>1</sup>H NMR (500 MHz, CD<sub>3</sub>OD) and <sup>13</sup>C NMR (126 MHz, CD<sub>3</sub>OD) spectra for 23d:**

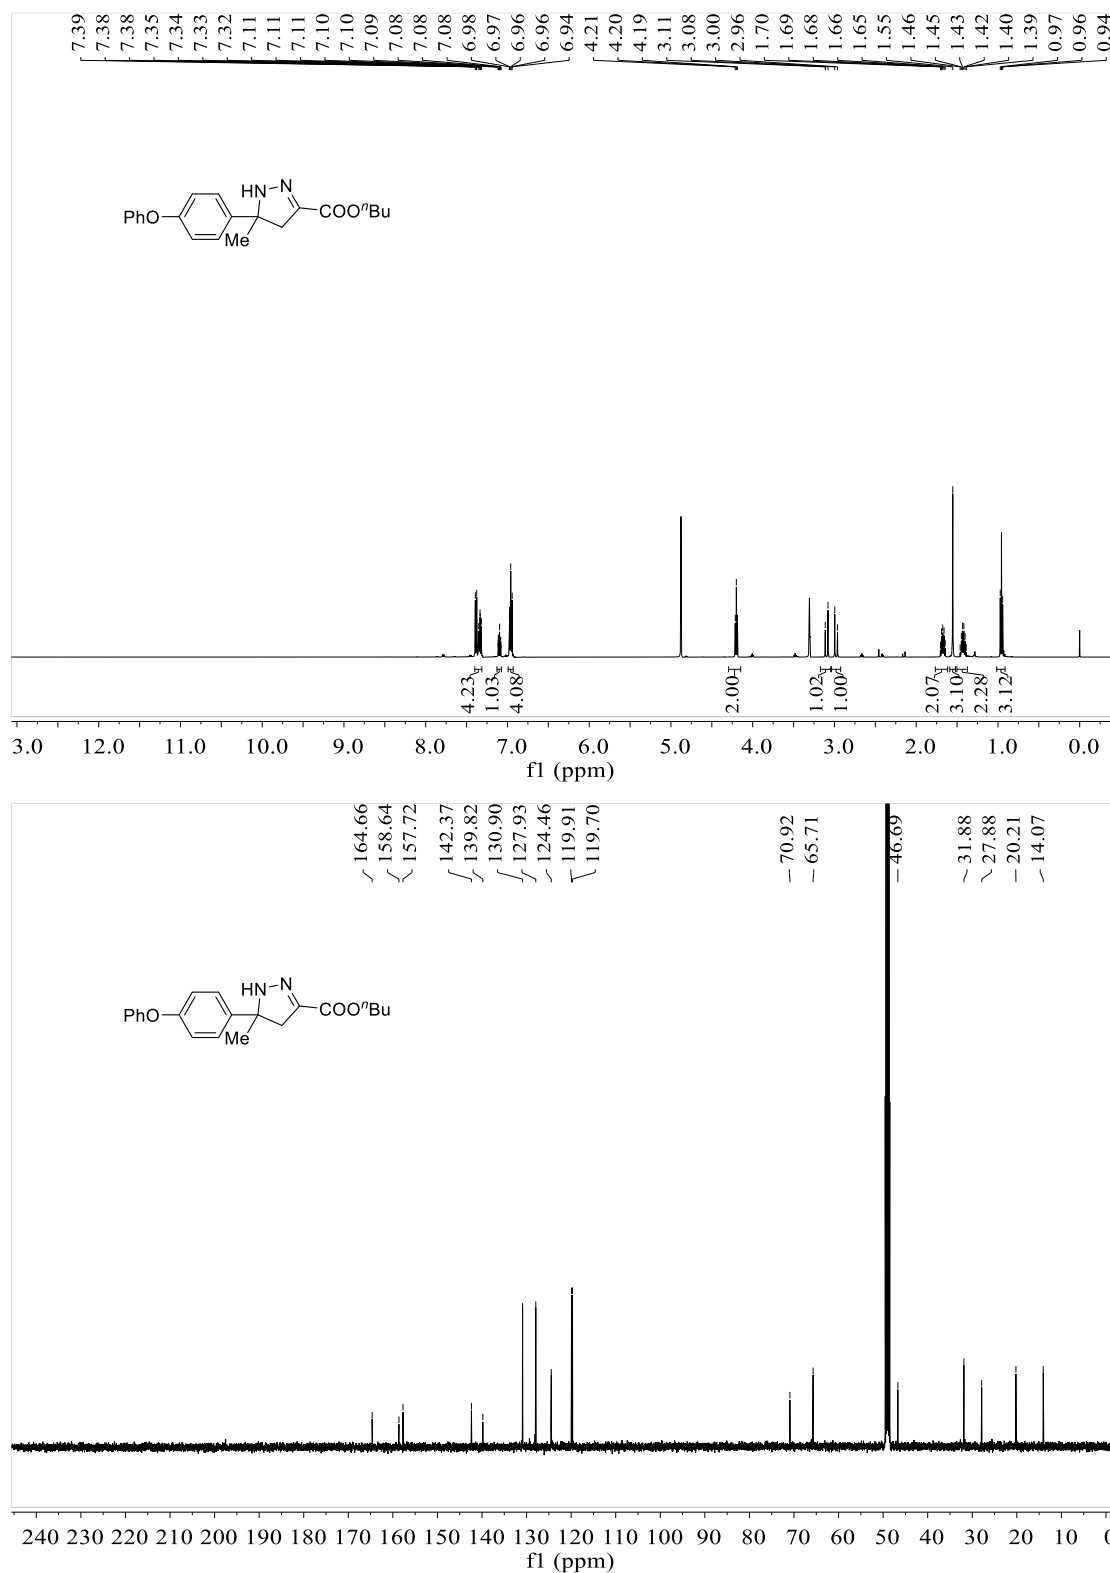

**<sup>1</sup>H NMR (500 MHz, CD<sub>3</sub>OD) and <sup>13</sup>C NMR (126 MHz, CD<sub>3</sub>OD) spectra for 24d:**

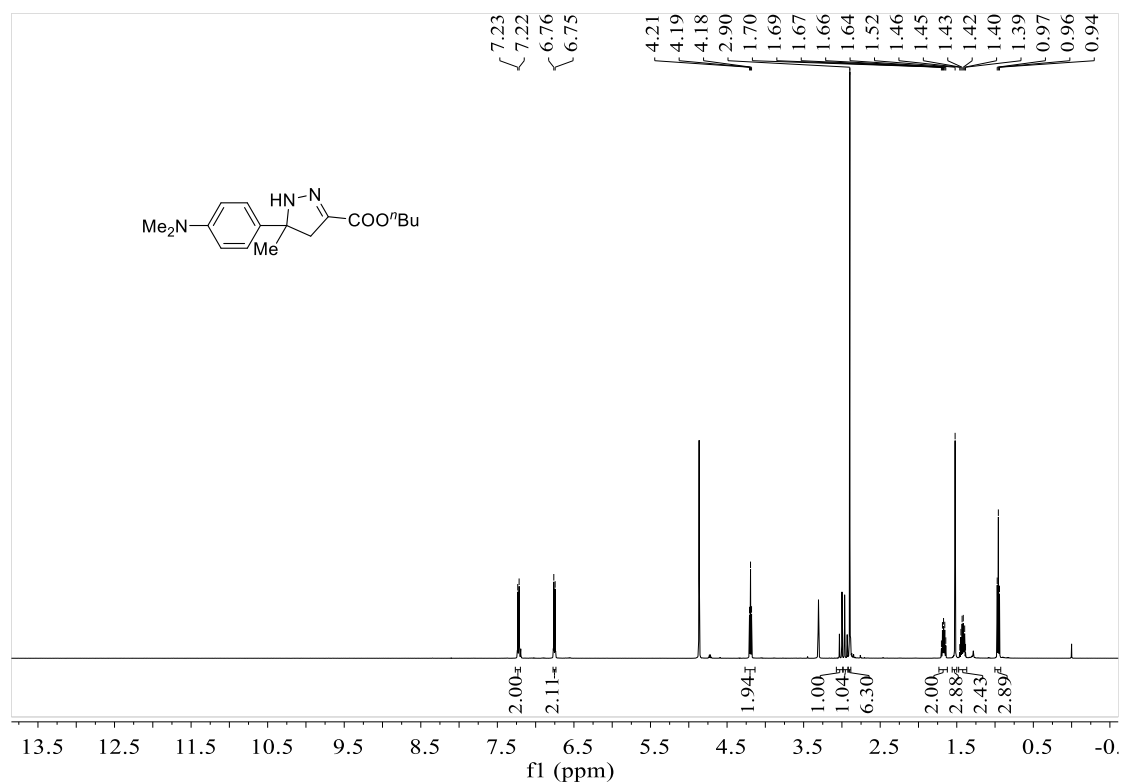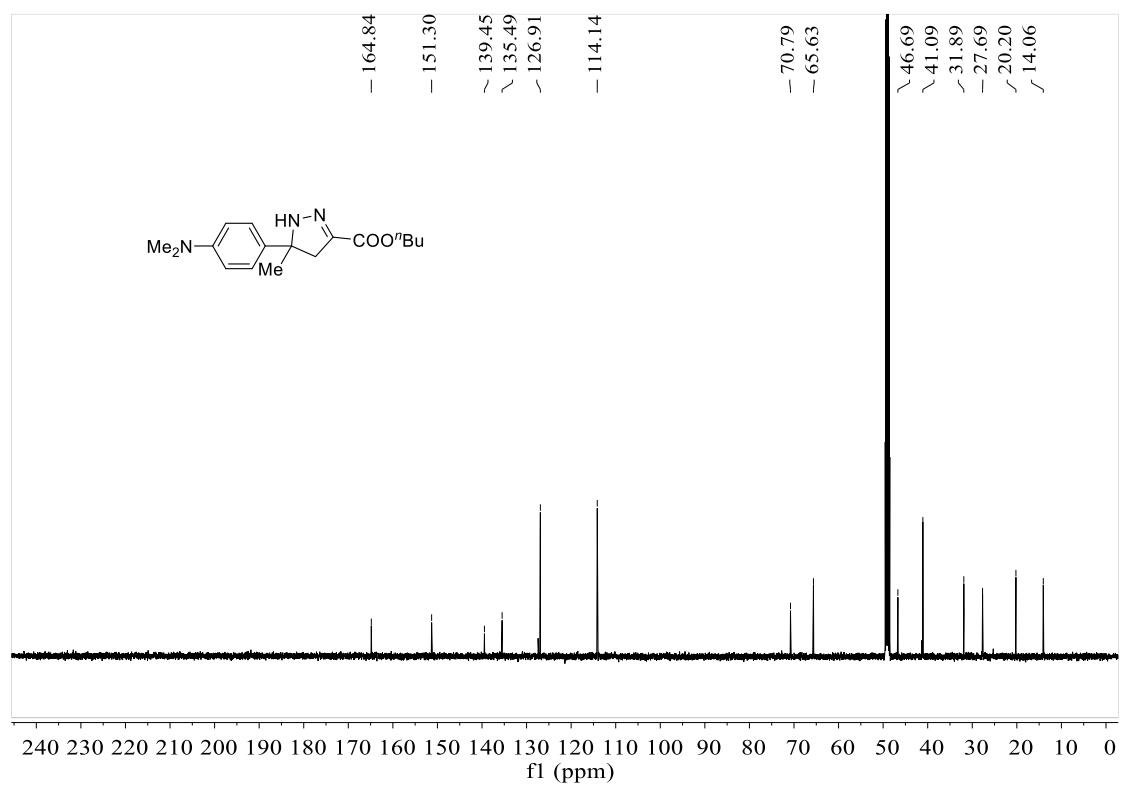

**<sup>1</sup>H NMR (500 MHz, CD<sub>3</sub>OD) and <sup>13</sup>C NMR (126 MHz, CD<sub>3</sub>OD) spectra for **25d**:**

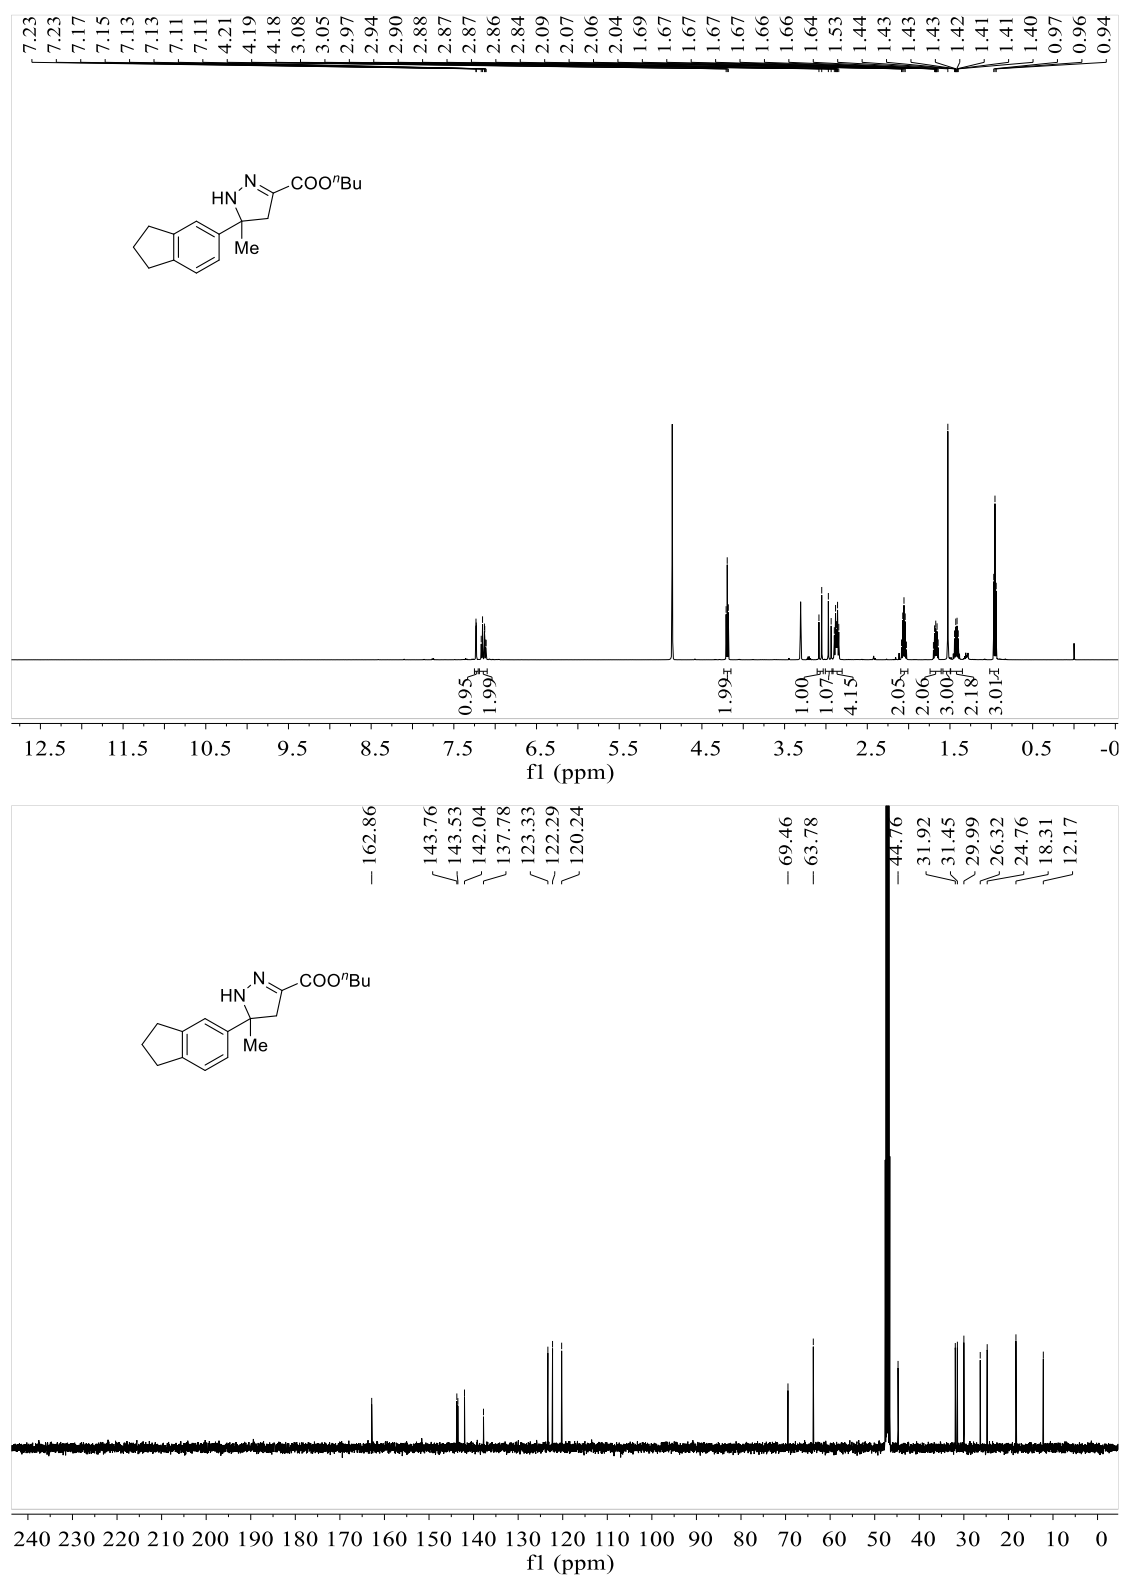

**<sup>1</sup>H NMR (500 MHz, CD<sub>3</sub>OD) and <sup>13</sup>C NMR (126 MHz, CD<sub>3</sub>OD) spectra for 26d:**

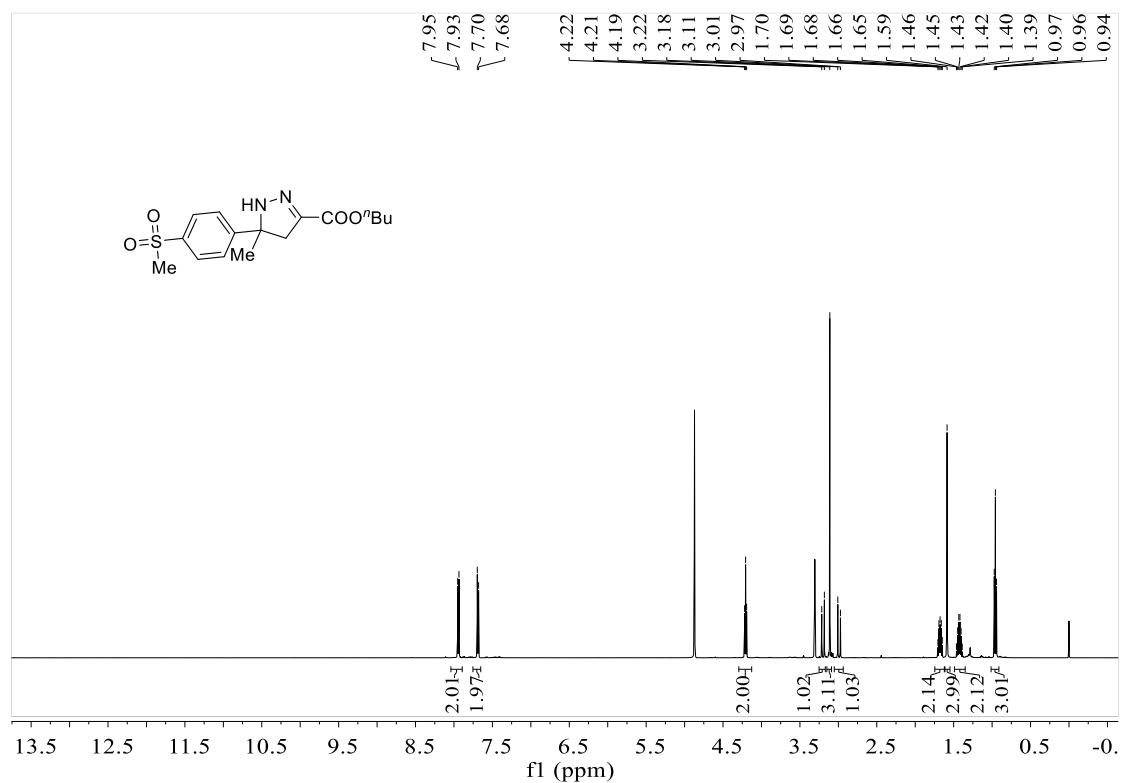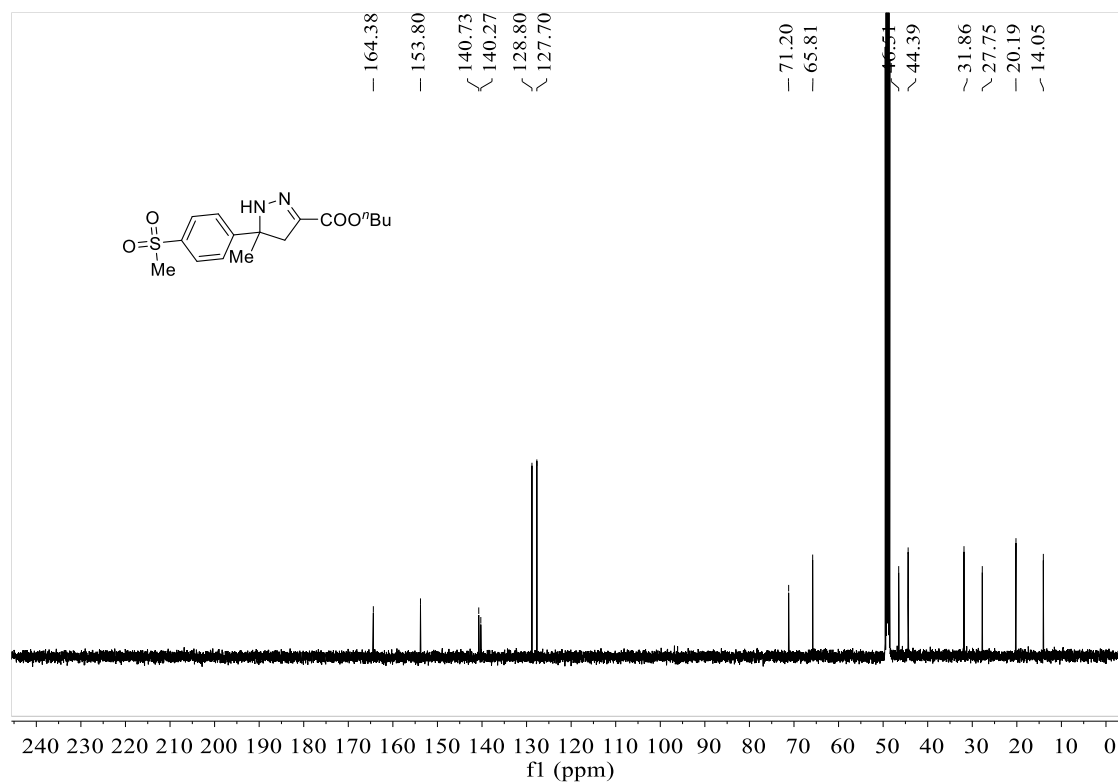

**<sup>1</sup>H NMR (500 MHz, CD<sub>3</sub>OD) and <sup>13</sup>C NMR (126 MHz, CD<sub>3</sub>OD) spectra for **27d**:**

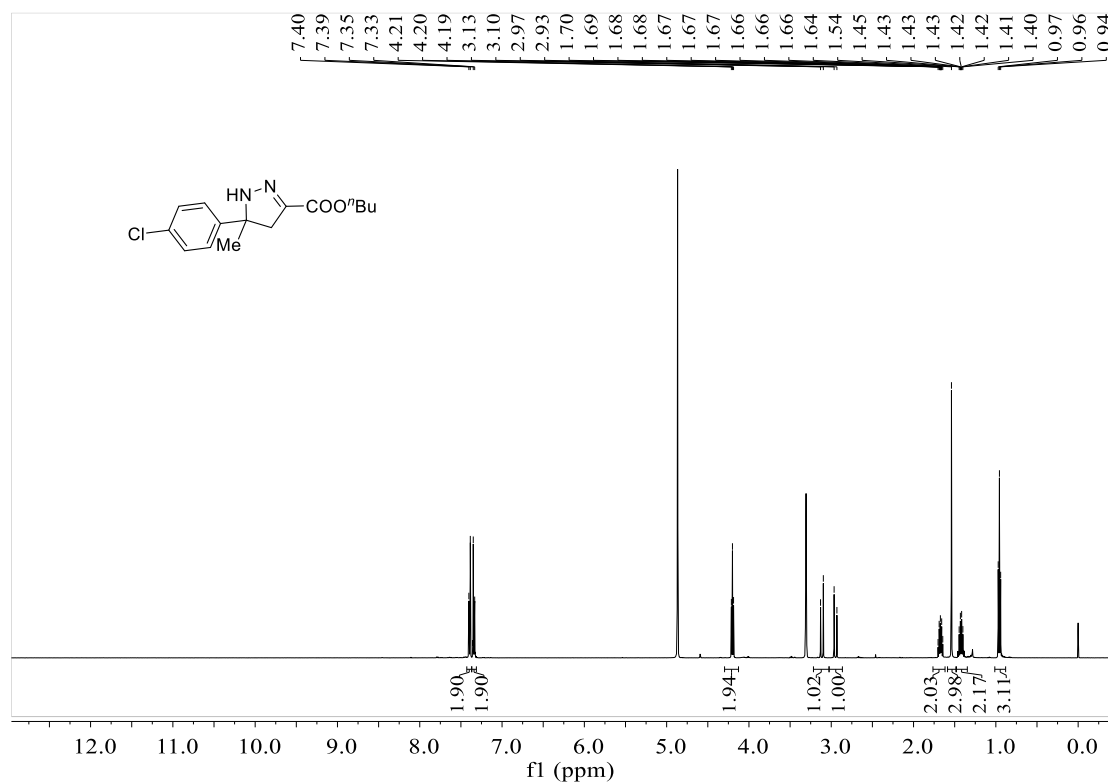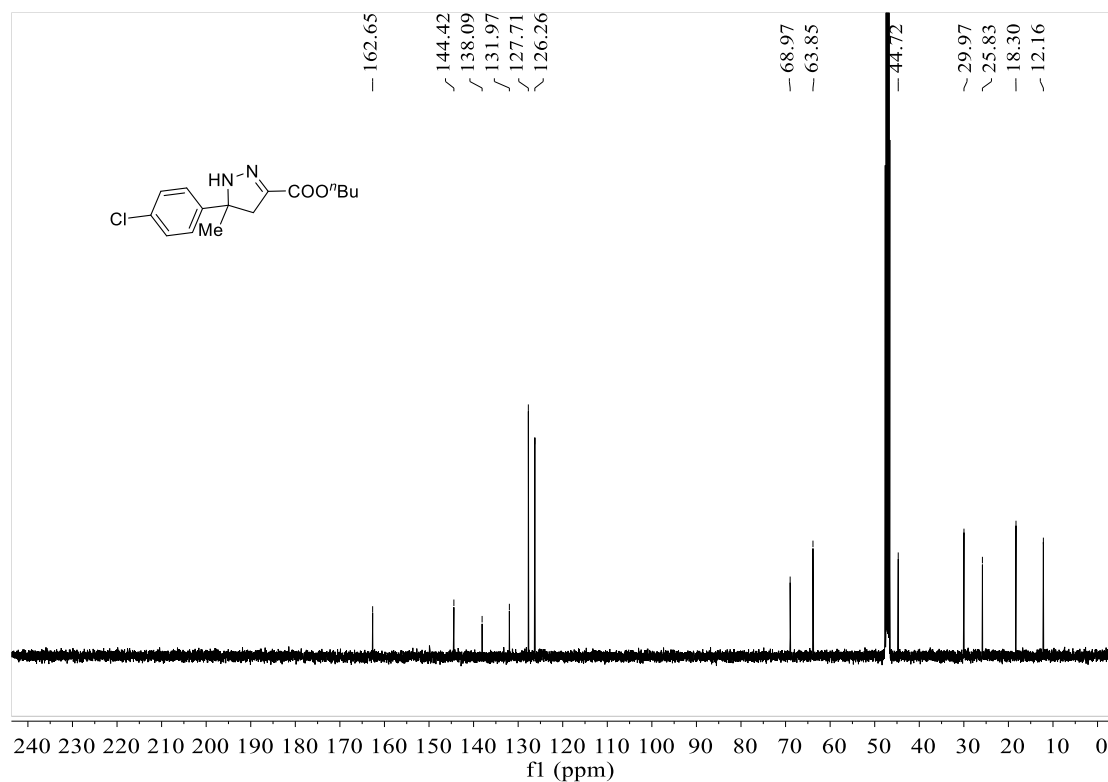



<sup>1</sup>H NMR (500 MHz, CDCl<sub>3</sub>) and <sup>13</sup>C NMR (126 MHz, CDCl<sub>3</sub>) spectra for **28d**:

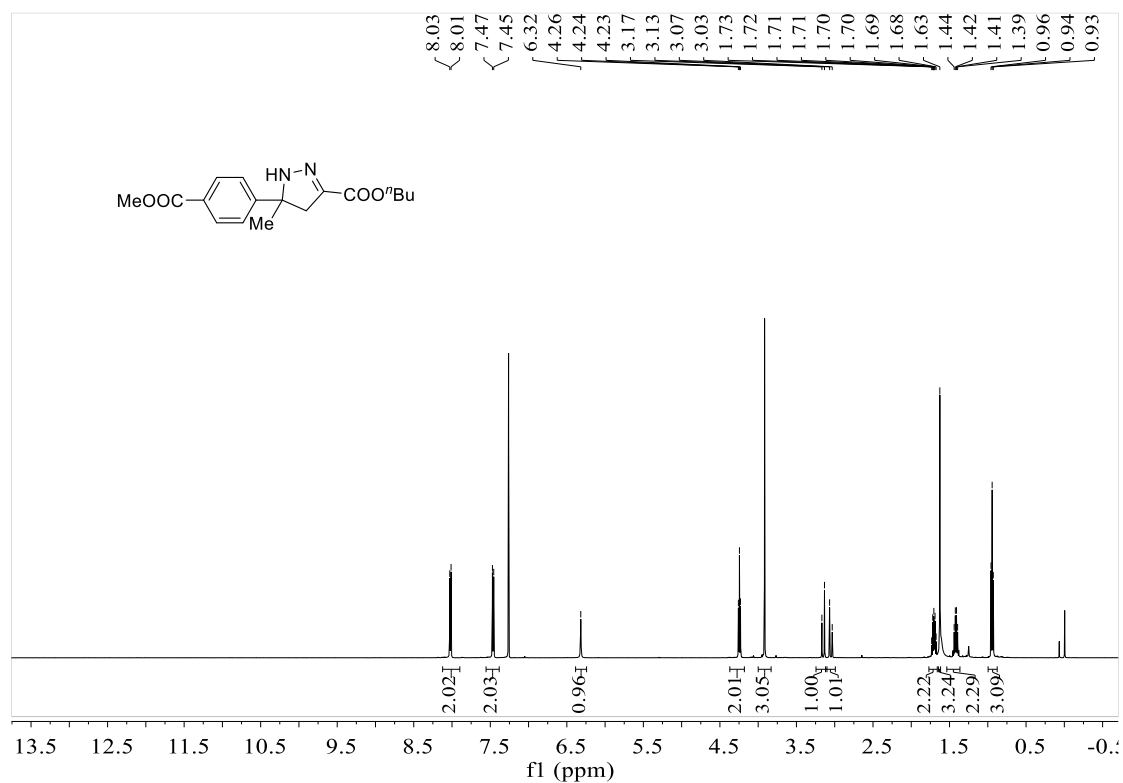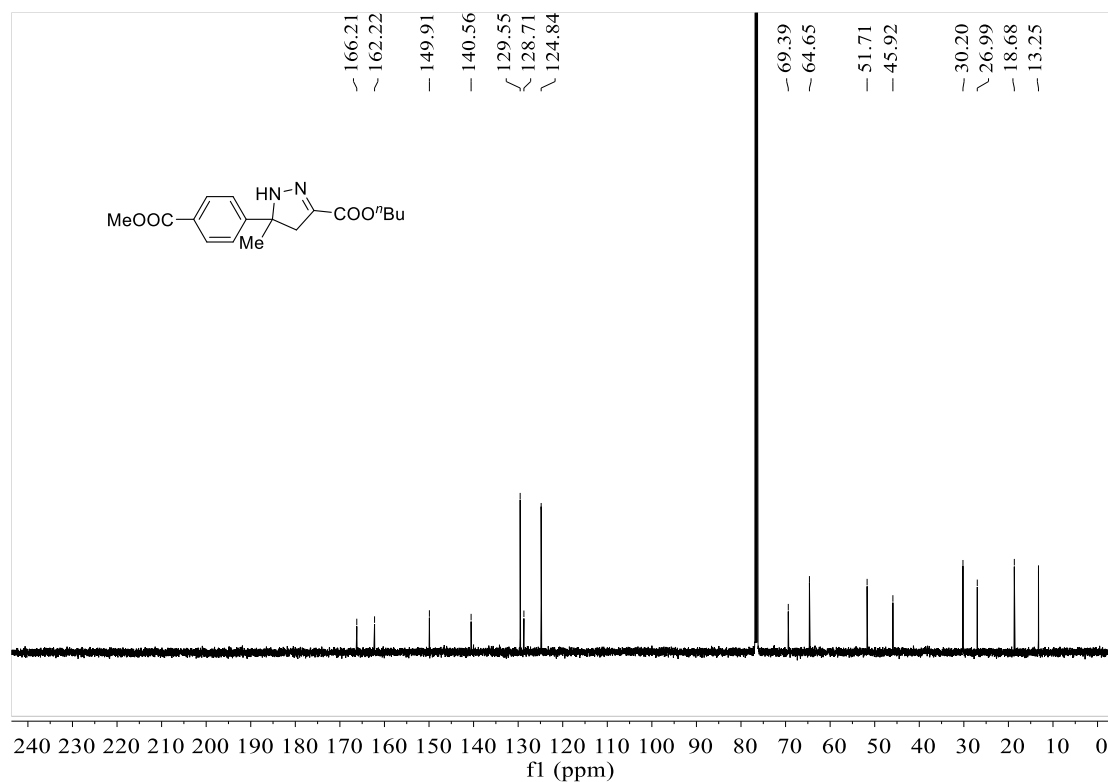

<sup>1</sup>H NMR (500 MHz, CD<sub>3</sub>OD) and <sup>13</sup>C NMR (126 MHz, CD<sub>3</sub>OD) spectra for **29d**:

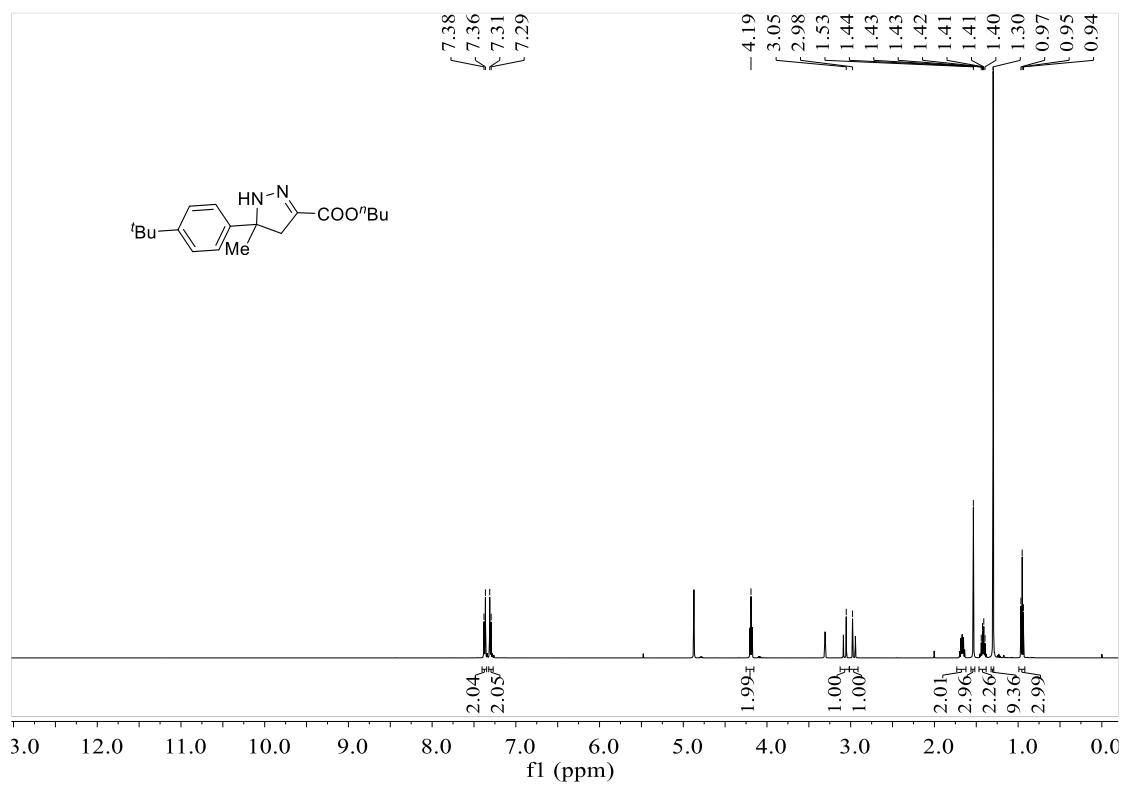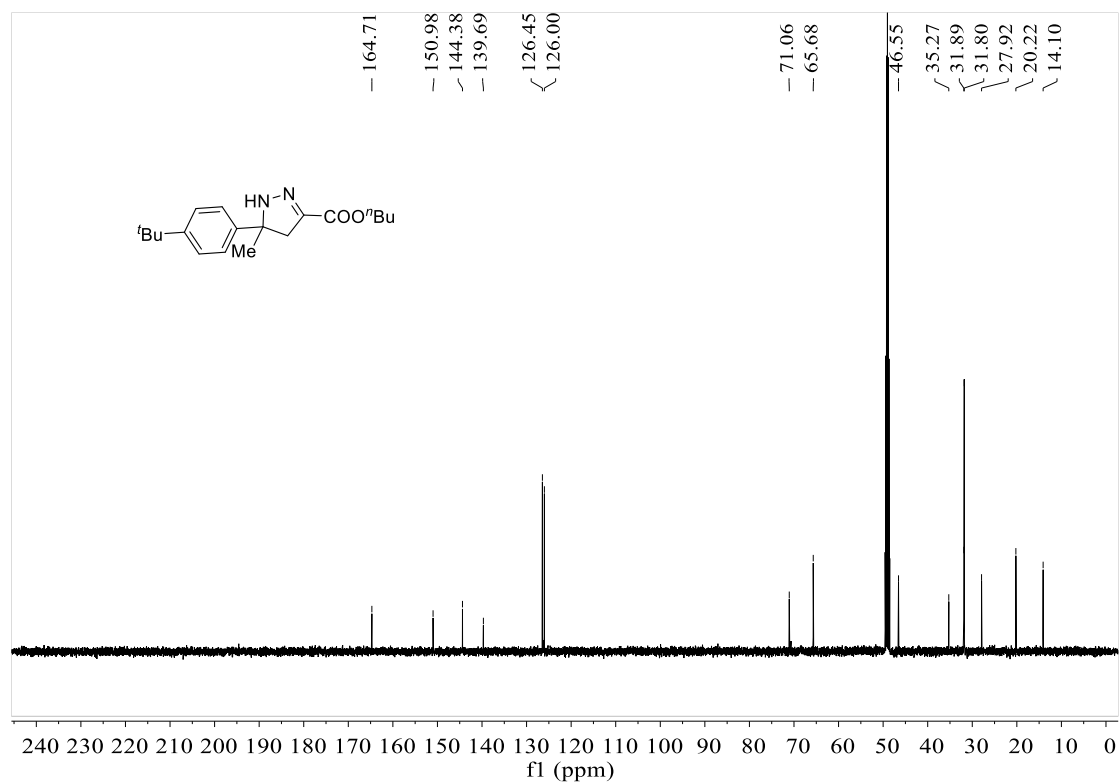

**$^1\text{H}$  NMR (500 MHz,  $\text{CD}_3\text{OD}$ ) and  $^{13}\text{C}$  NMR (126 MHz,  $\text{CD}_3\text{OD}$ ) spectra for **30d**:**

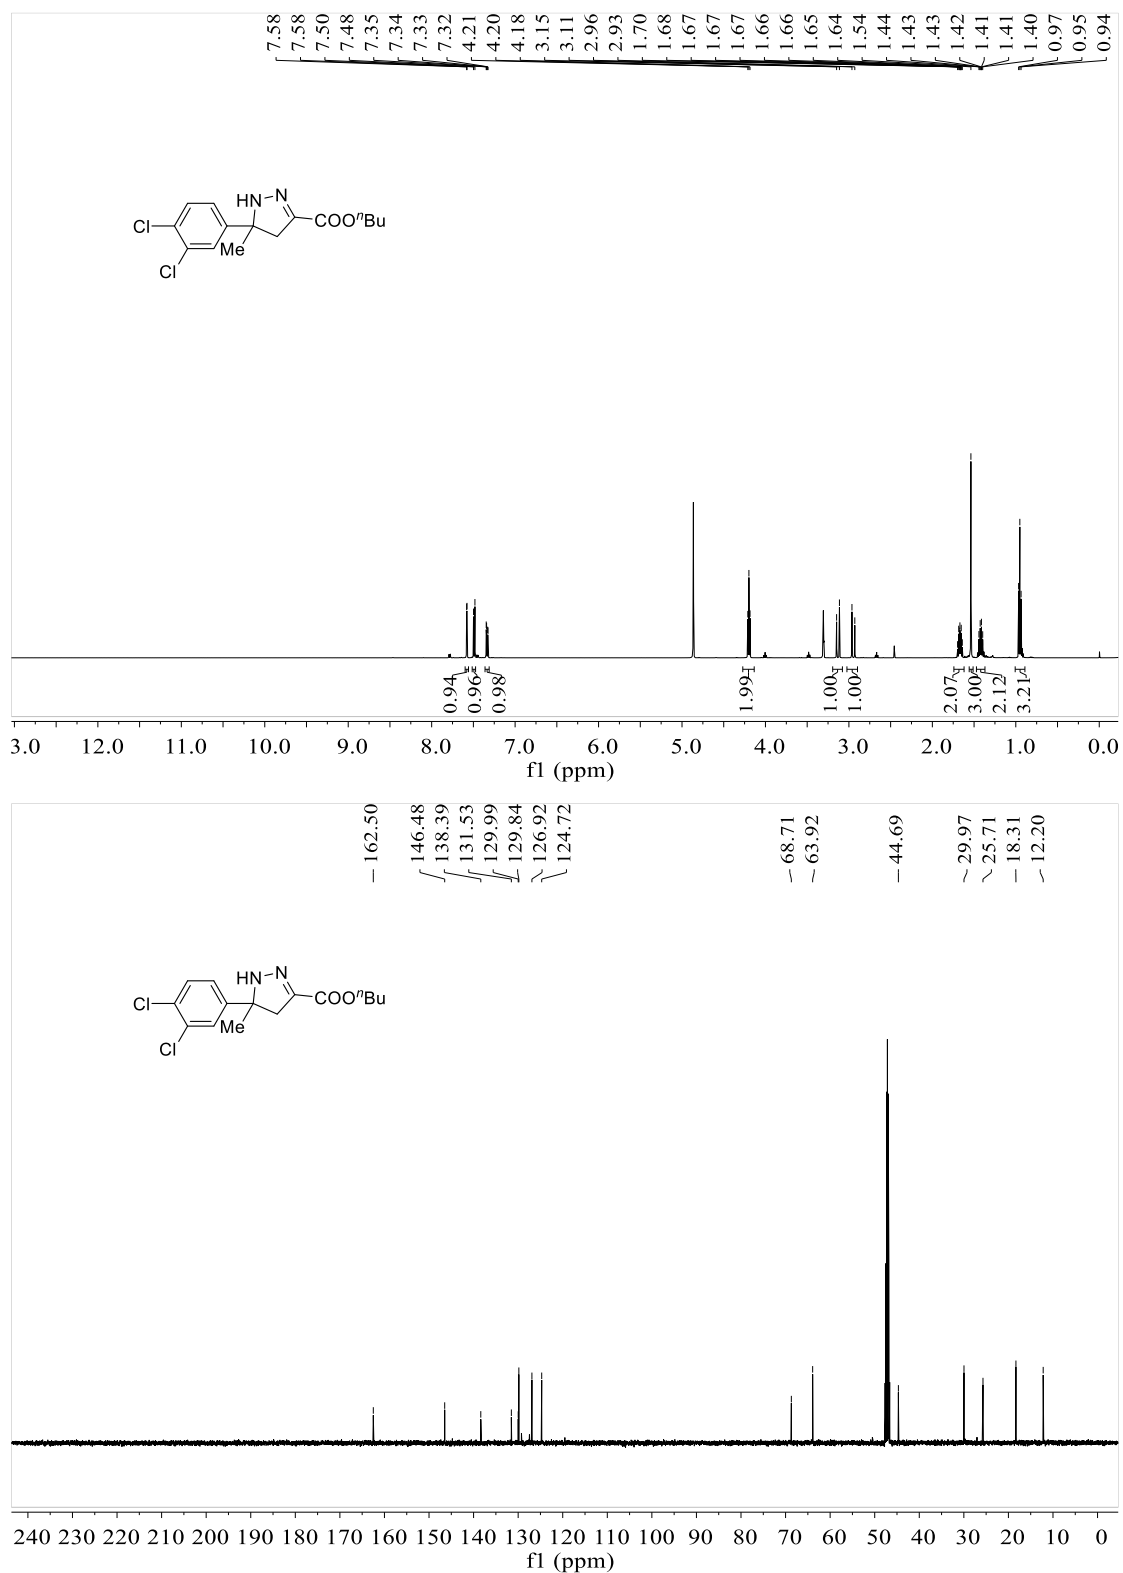

**<sup>1</sup>H NMR (500 MHz, CD<sub>3</sub>OD) and <sup>13</sup>C NMR (126 MHz, CD<sub>3</sub>OD) spectra for **31d**:**

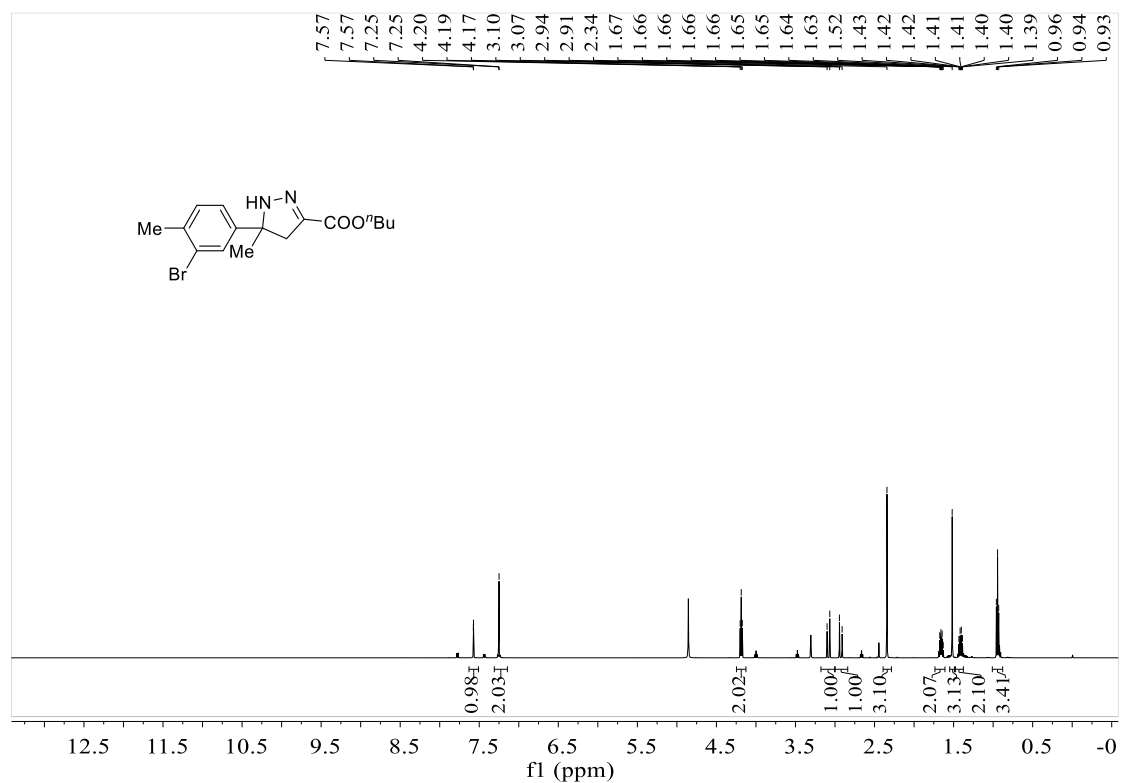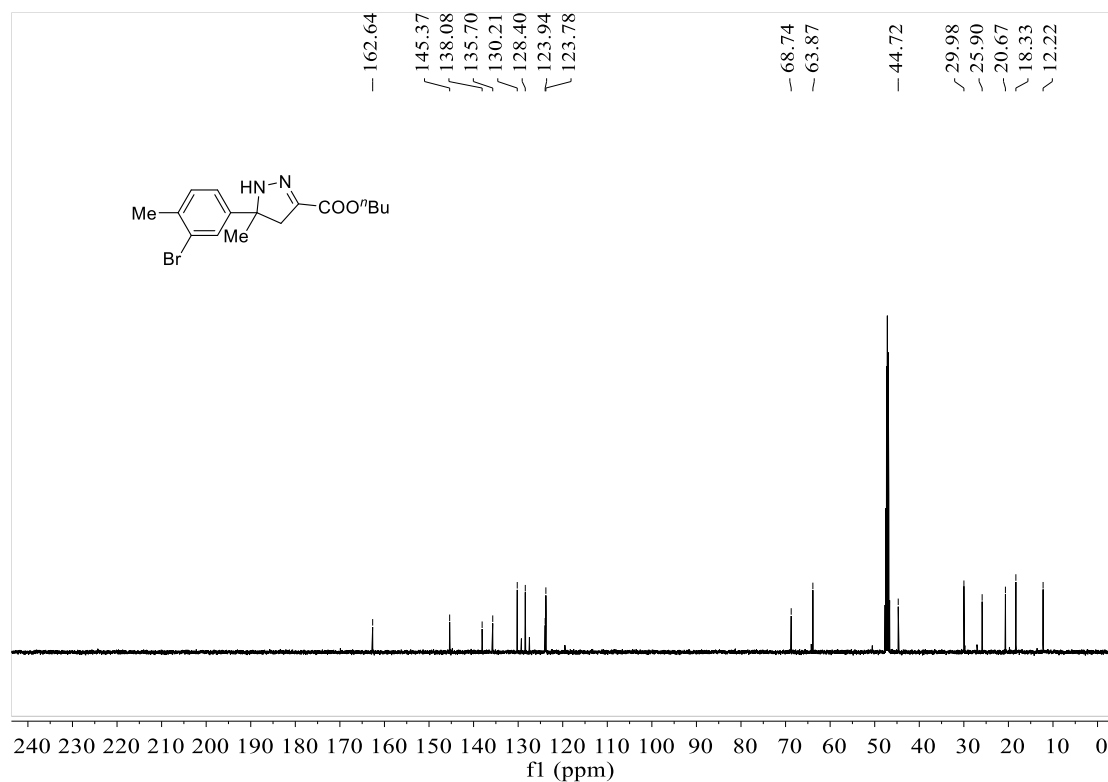

Chemical structure of compound 10: CC1=C(C(C(C1)C(=O)OCC(C)(C)C)N2C=NC=C2C3=CC=CC=C3)C4=CC=CC=C4

<sup>1</sup>H NMR spectrum (CDCl<sub>3</sub>) of compound 10. The x-axis represents the chemical shift in ppm, ranging from 0.0 to 13.0. The spectrum shows several peaks corresponding to the structure, with integration values provided below the baseline.

Chemical shift (ppm): 7.60, 7.59, 7.58, 7.58, 7.47, 7.47, 7.45, 7.45, 7.42, 7.42, 7.41, 7.41, 7.40, 7.39, 7.39, 7.31, 7.31, 4.21, 4.21, 4.20, 4.20, 4.19, 4.18, 4.18, 3.11, 3.10, 3.02, 3.02, 1.69, 1.68, 1.67, 1.67, 1.66, 1.65, 1.58, 1.57, 1.43, 1.42, 1.41, 1.41, 0.97, 0.96, 0.95, 0.95, 0.94, 0.93.

Integration values: 5.07, 2.01, 2.30, 1.15, 2.10, 1.00, 1.00, 2.34, 3.14, 2.37, 3.42.

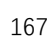

**<sup>1</sup>H NMR (500 MHz, CD<sub>3</sub>OD) and <sup>13</sup>C NMR (126 MHz, CD<sub>3</sub>OD) spectra for **33d**:**

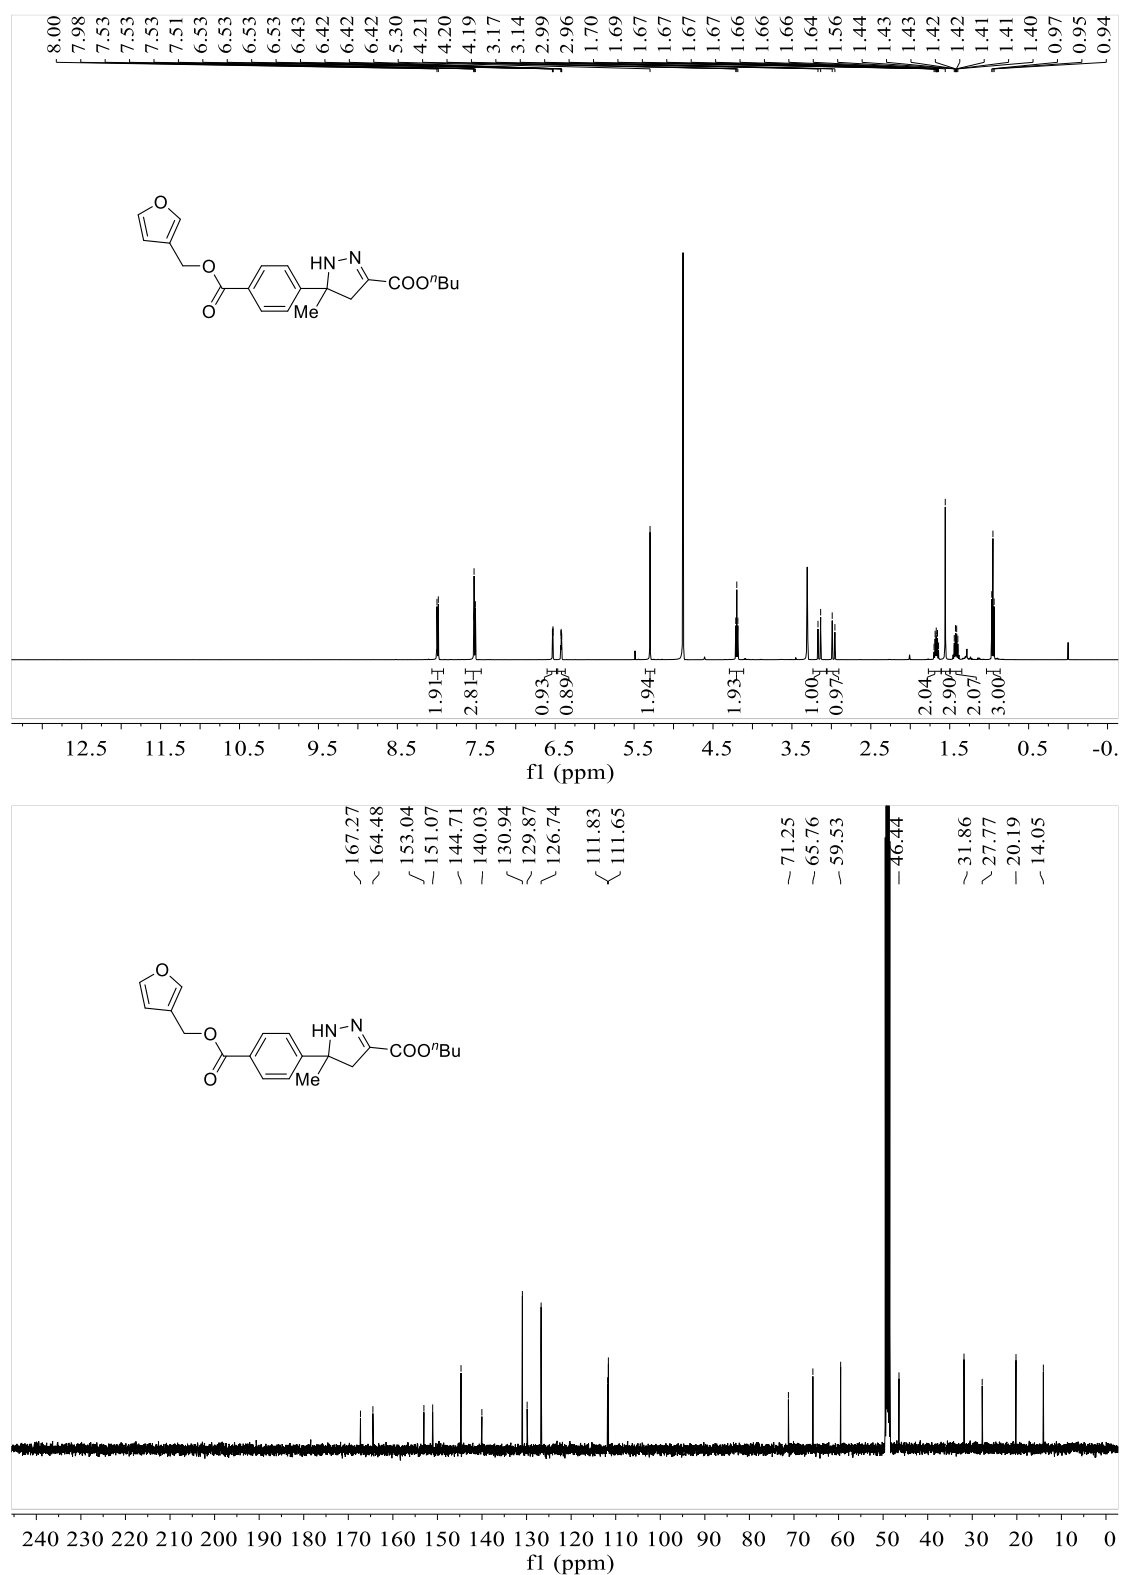

**$^1\text{H}$  NMR (500 MHz,  $\text{CD}_3\text{OD}$ ) and  $^{13}\text{C}$  NMR (126 MHz,  $\text{CD}_3\text{OD}$ ) spectra for **34d**:**

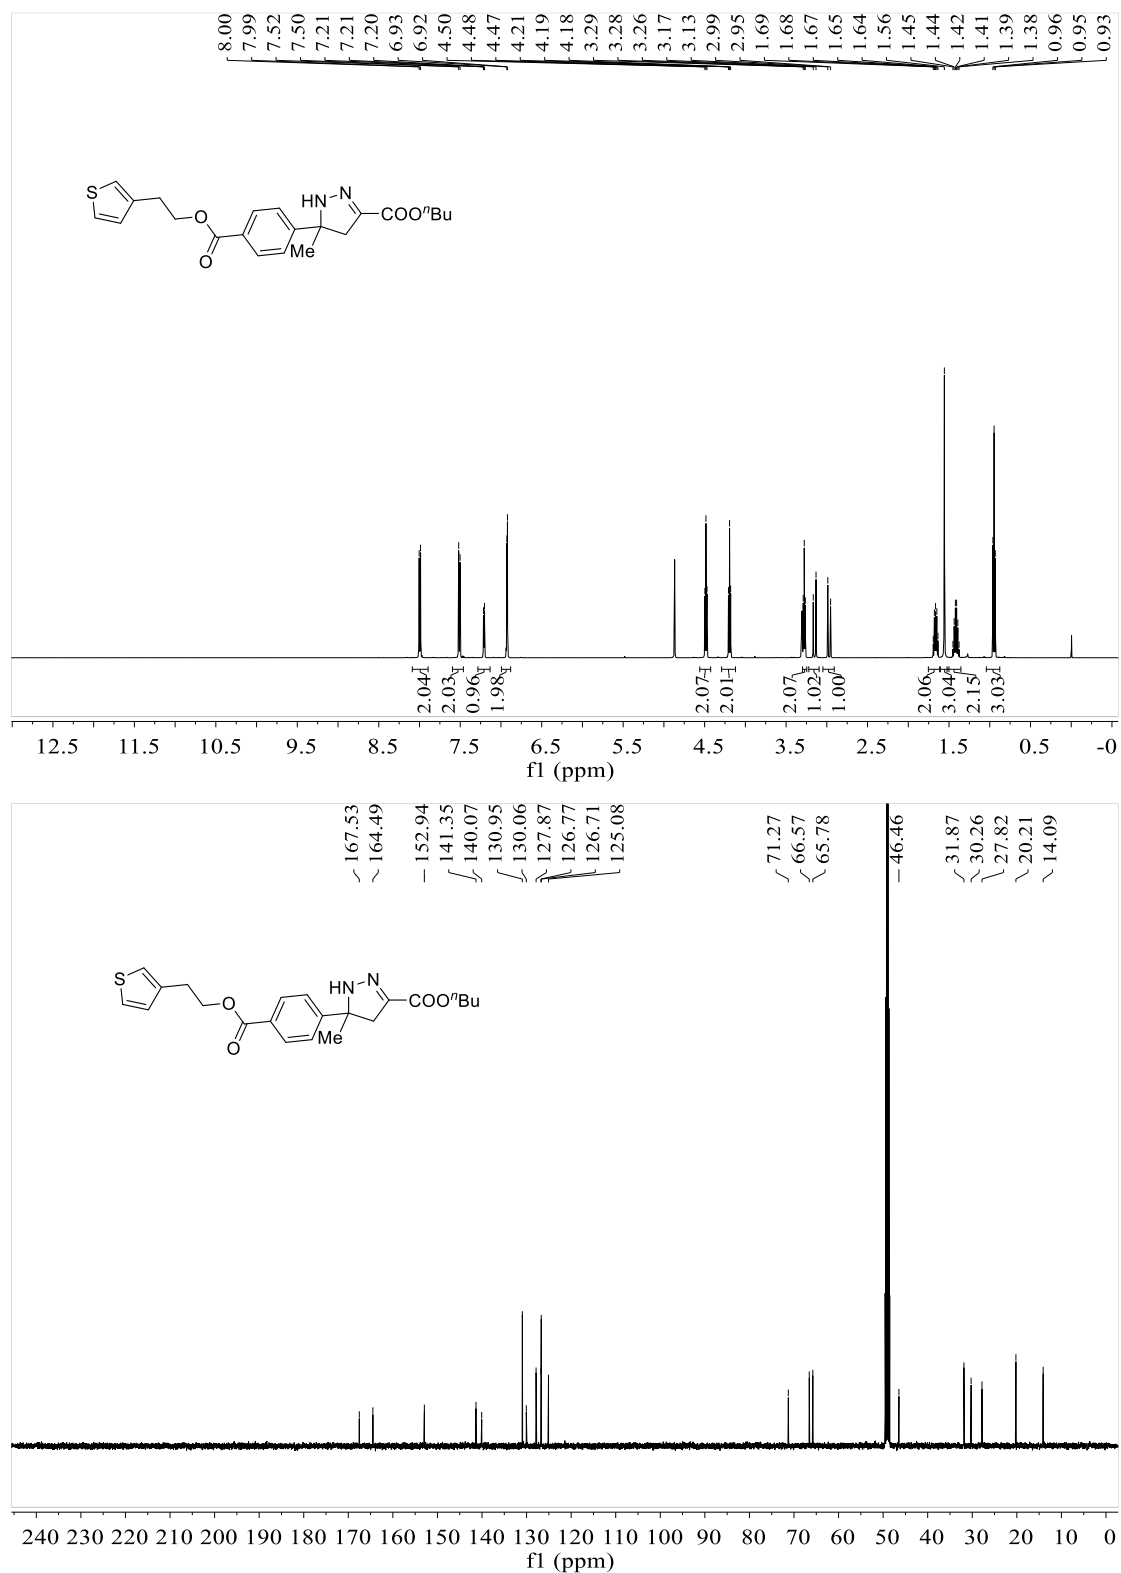

**<sup>1</sup>H NMR (500 MHz, CD<sub>3</sub>OD) and <sup>13</sup>C NMR (126 MHz, CD<sub>3</sub>OD) spectra for **35d**:**

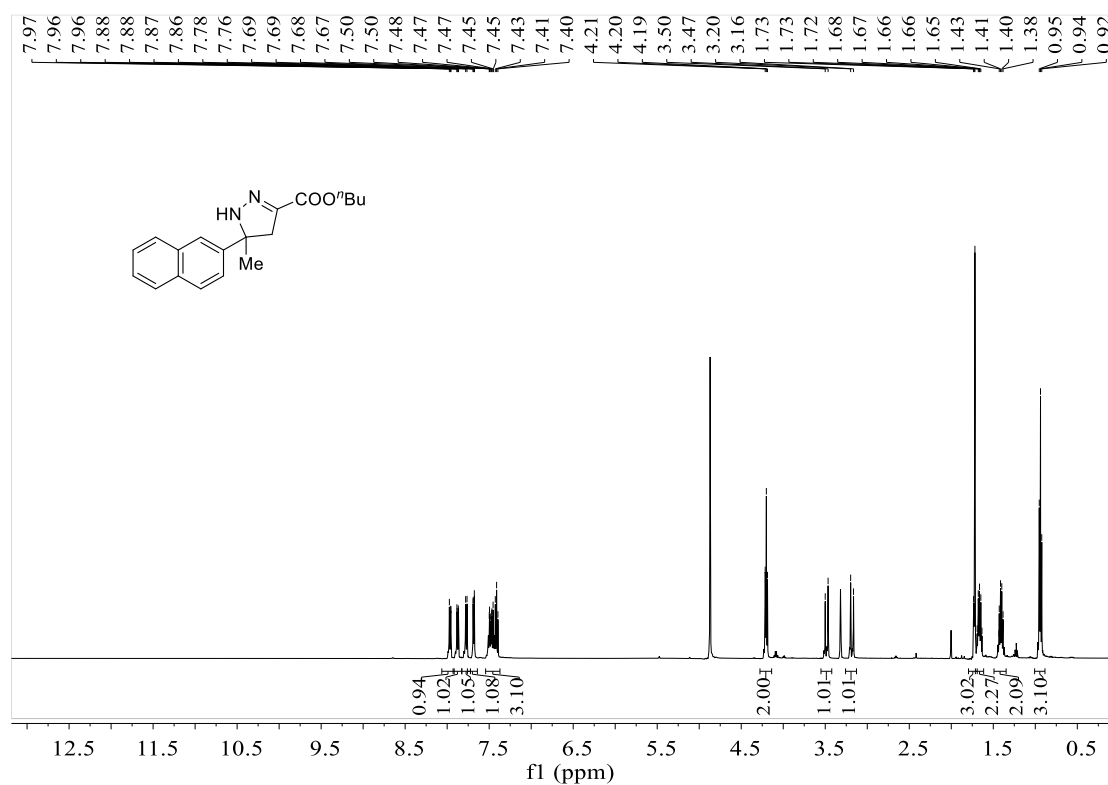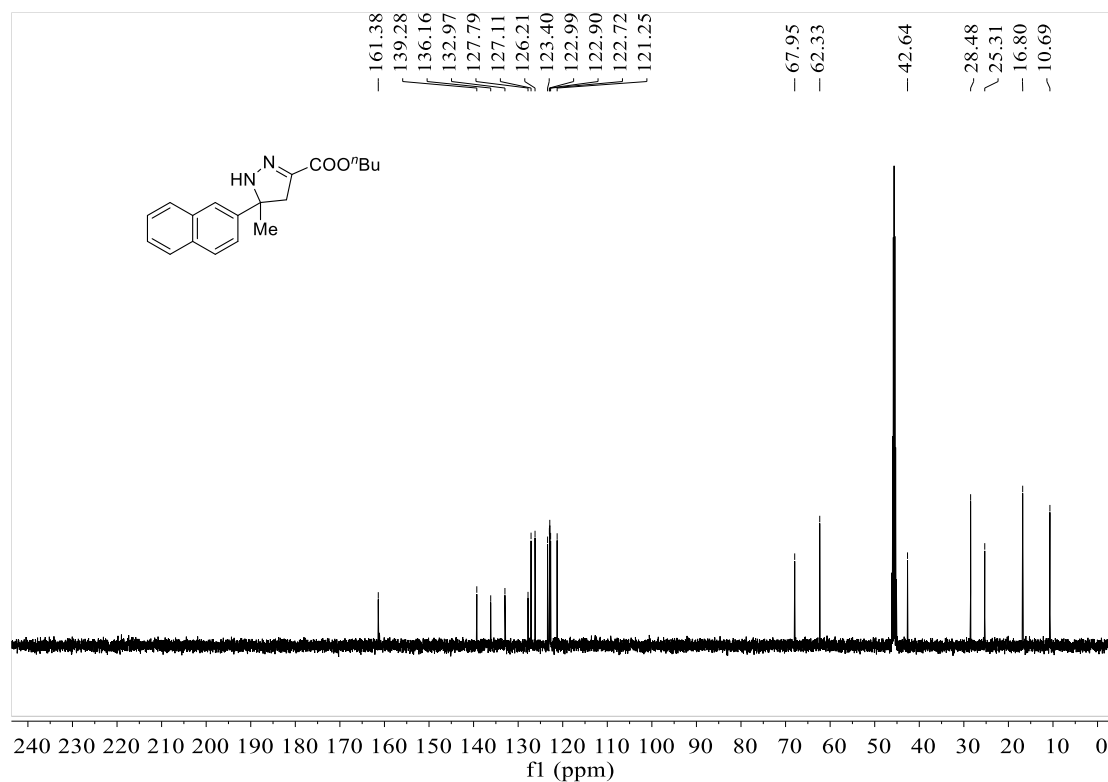



**<sup>1</sup>H NMR (500 MHz, CD<sub>3</sub>OD) and <sup>13</sup>C NMR (126 MHz, CD<sub>3</sub>OD) spectra for 36d:**

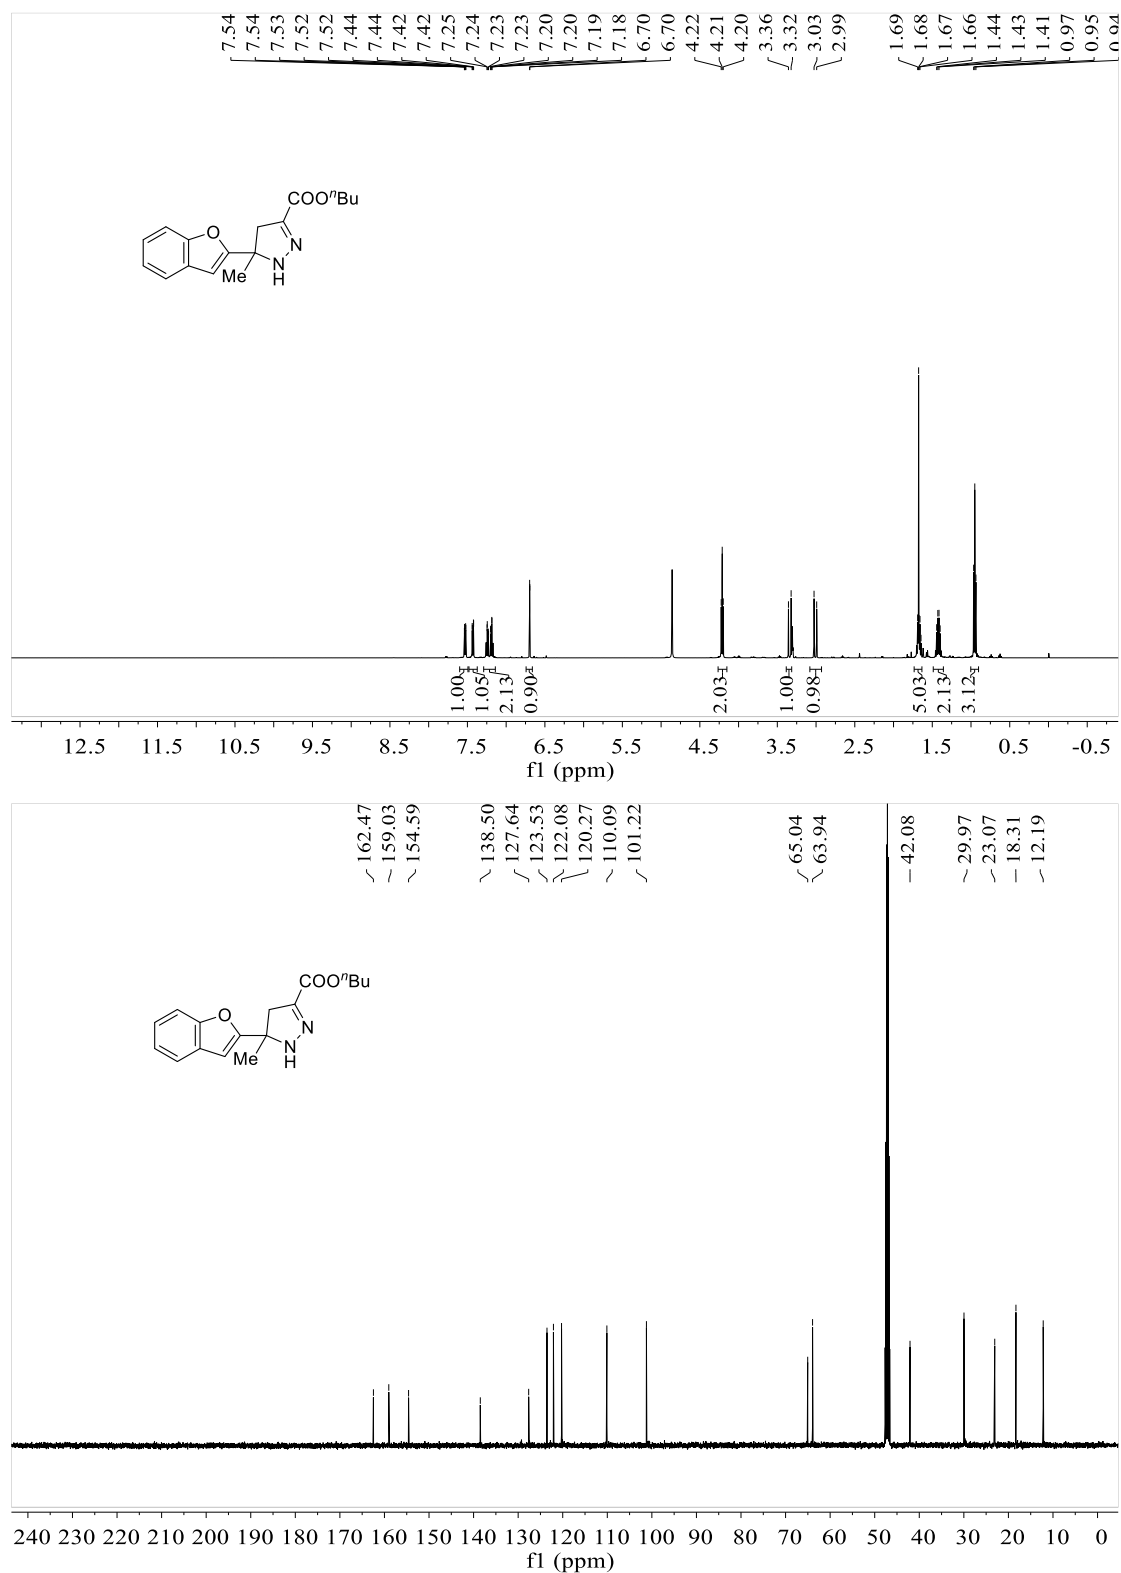

**$^1\text{H}$  NMR (500 MHz,  $\text{CD}_3\text{OD}$ ) and  $^{13}\text{C}$  NMR (126 MHz,  $\text{CD}_3\text{OD}$ ) spectra for **37d**:**

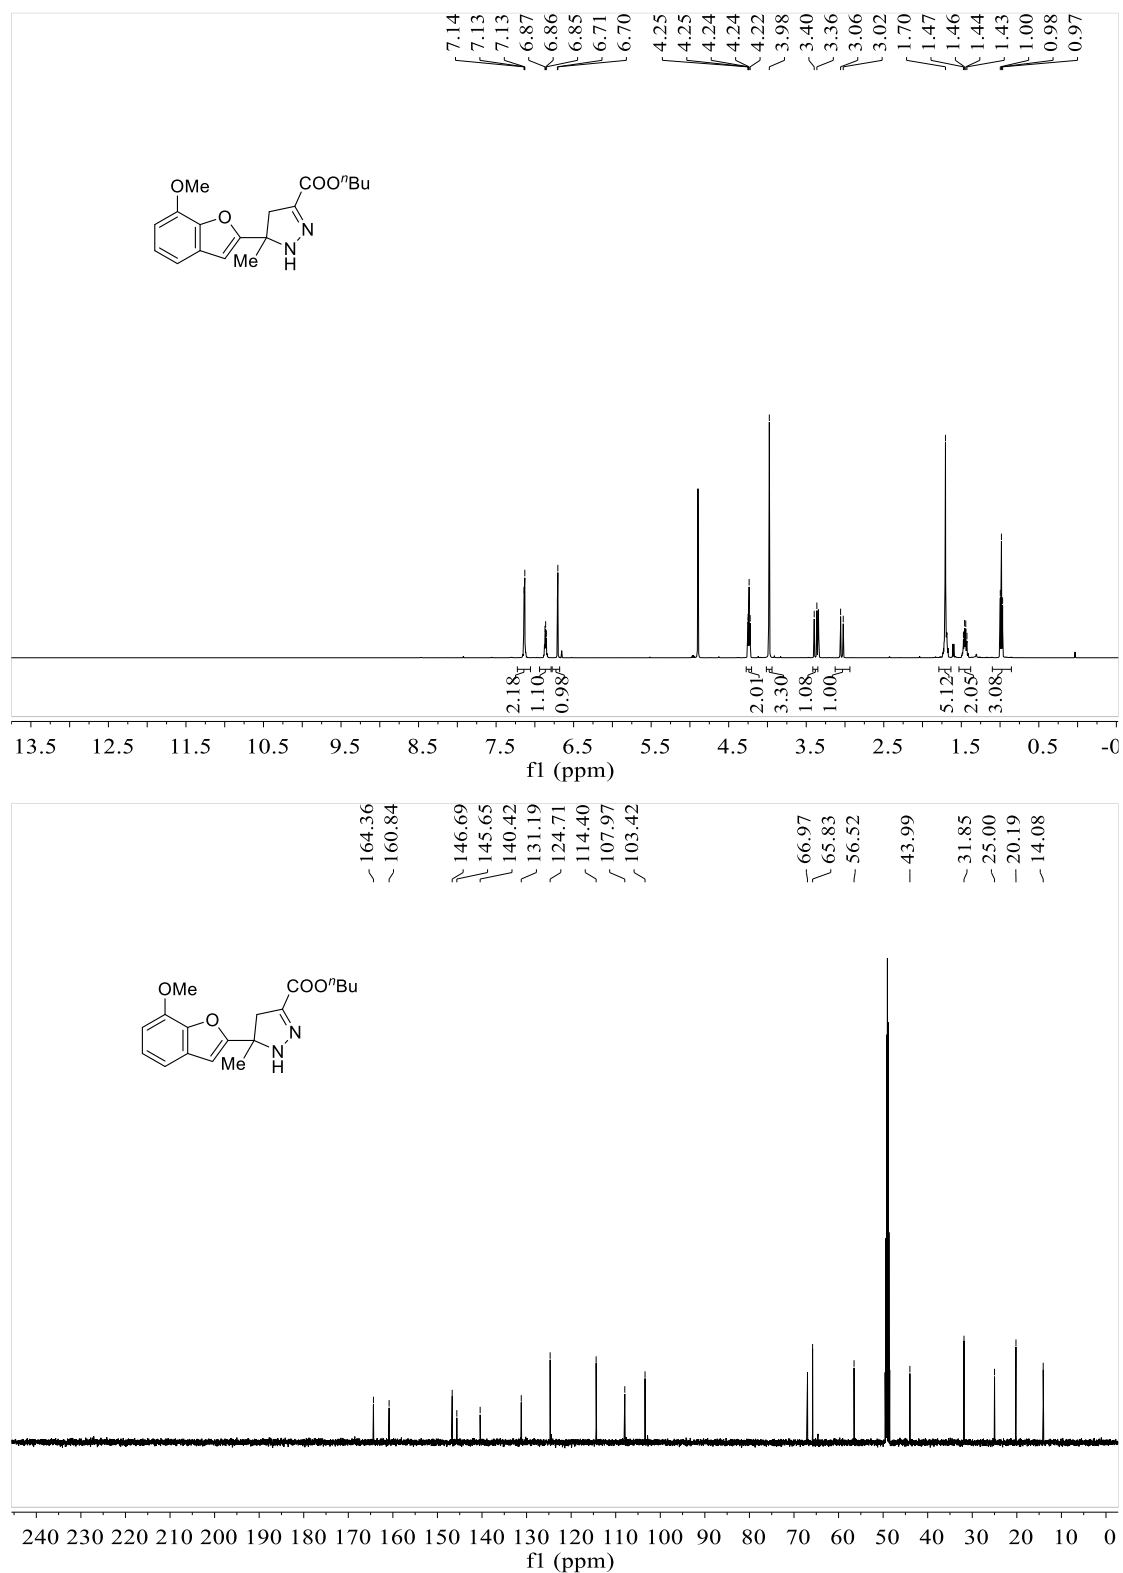

**<sup>1</sup>H NMR (500 MHz, CD<sub>3</sub>OD) and <sup>13</sup>C NMR (126 MHz, CD<sub>3</sub>OD) spectra for **38d**:**

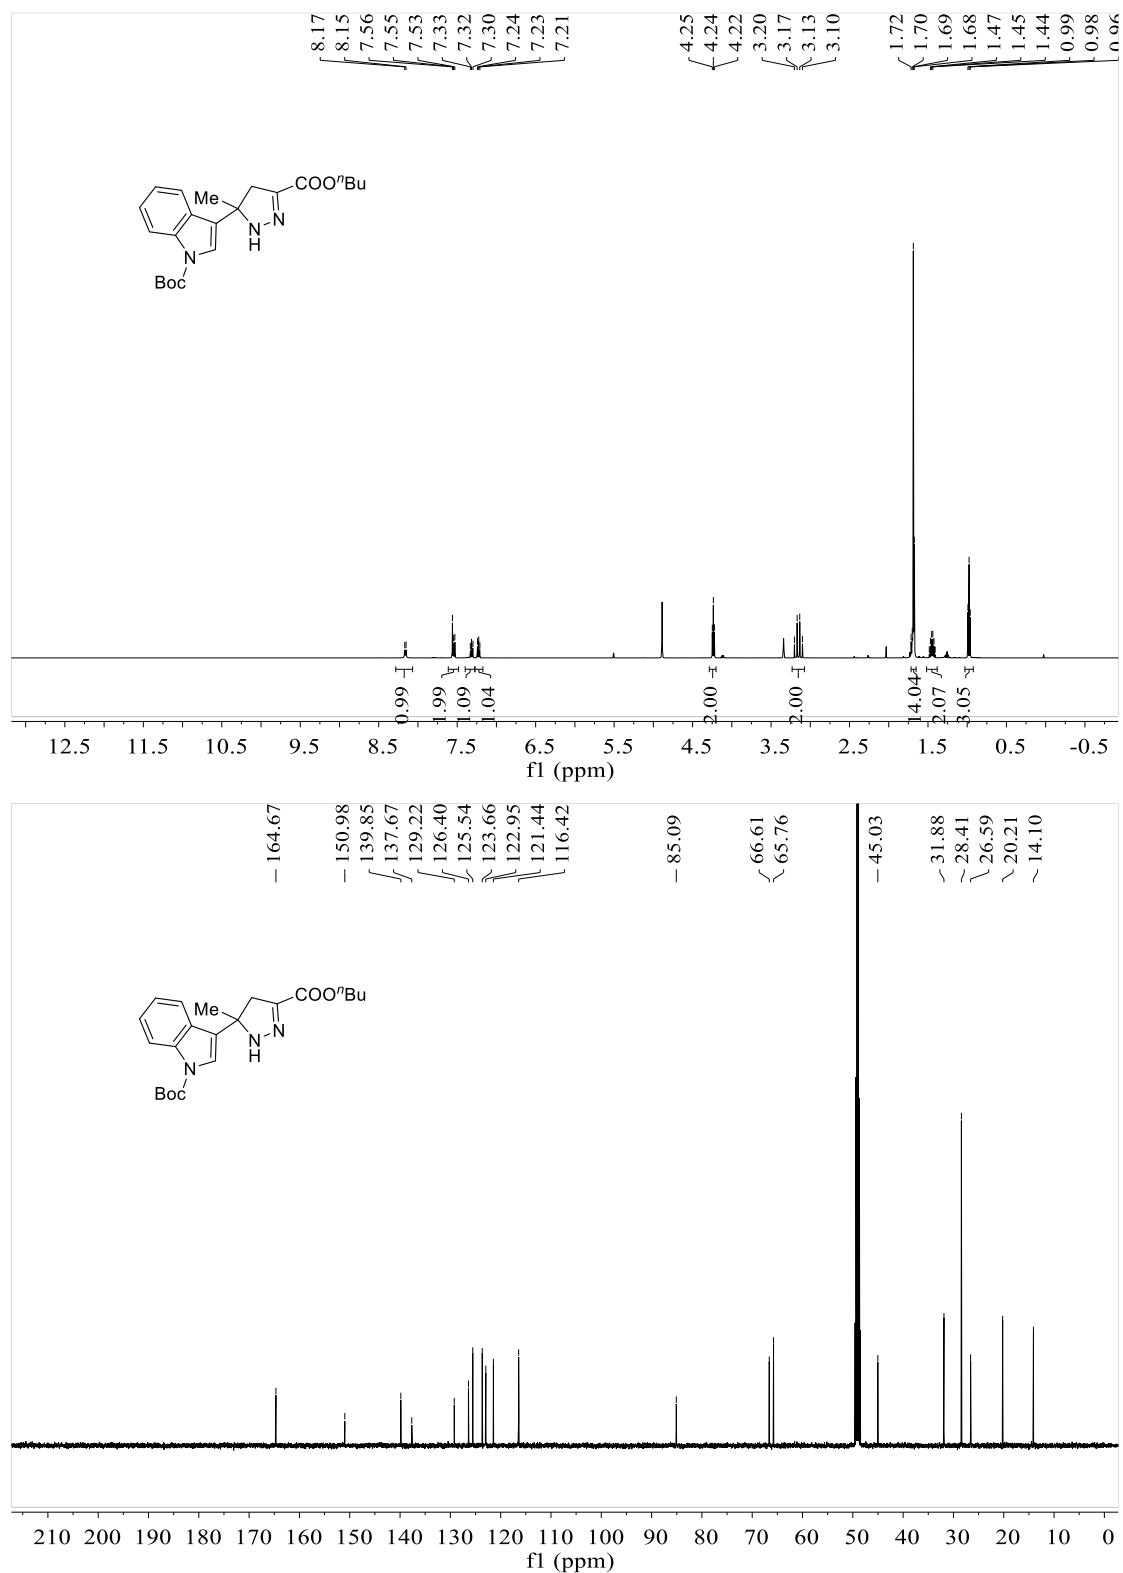

**<sup>1</sup>H NMR (500 MHz, CDCl<sub>3</sub>) and <sup>13</sup>C NMR (126 MHz, CDCl<sub>3</sub>) spectra for 39d:**

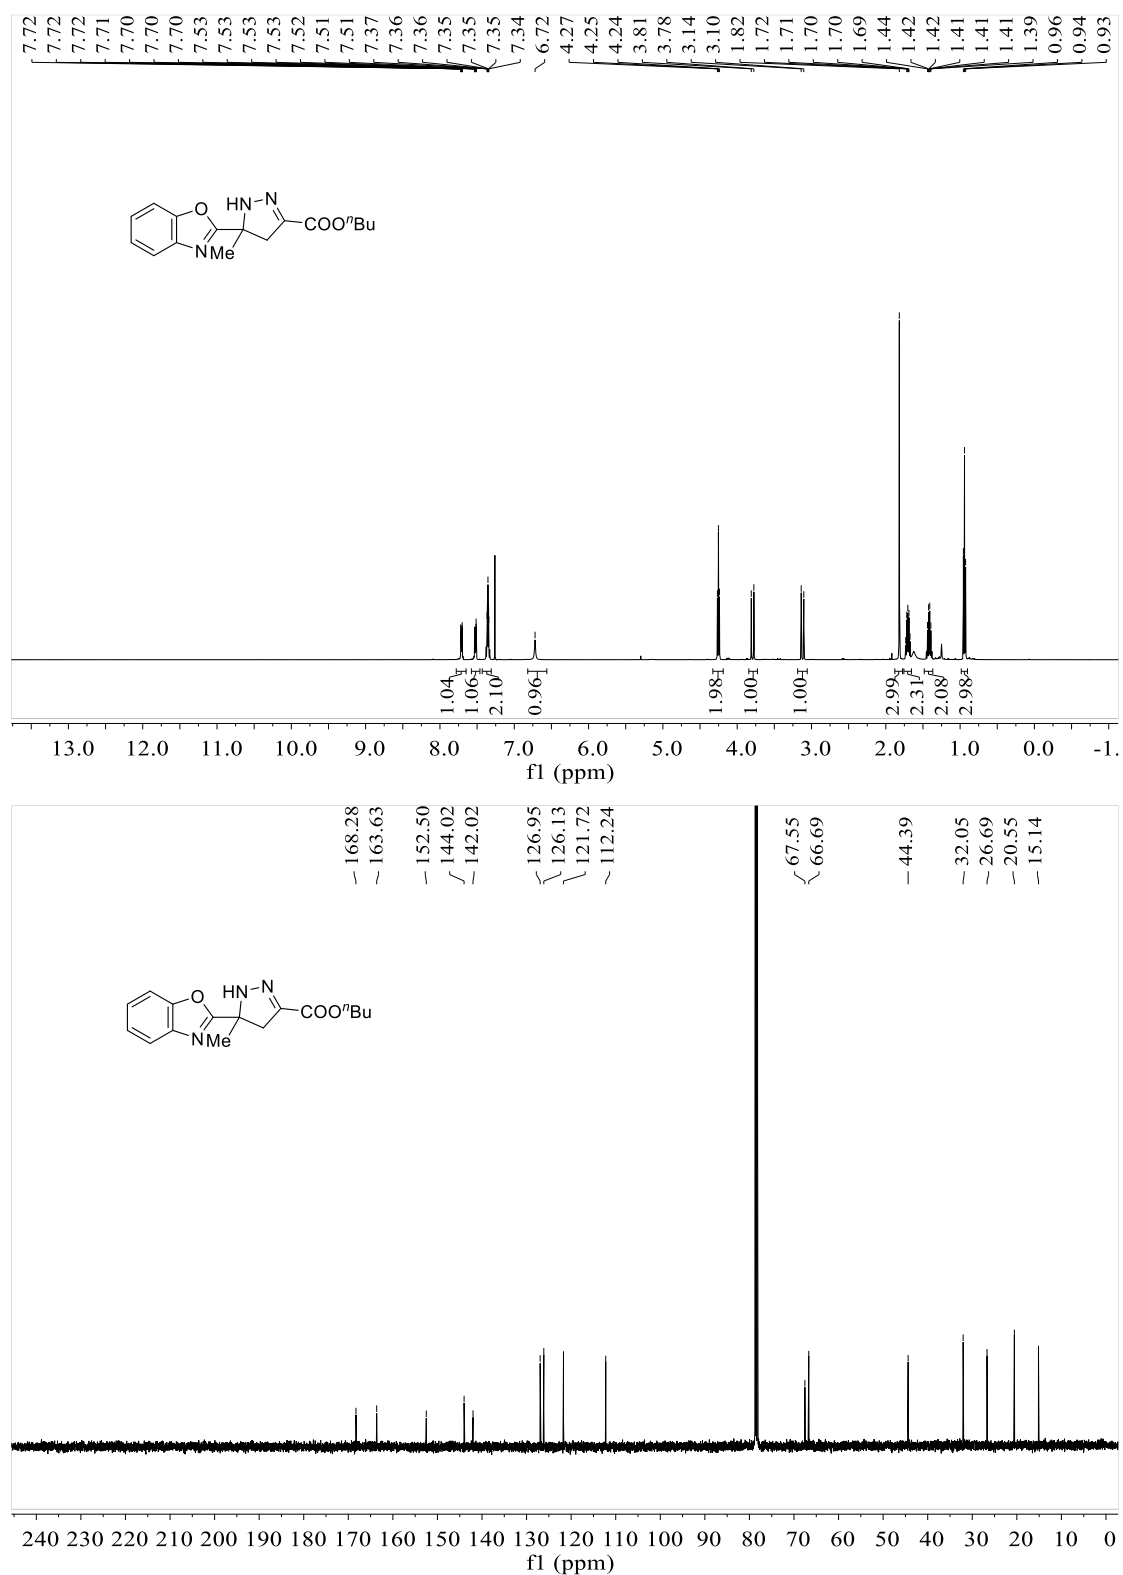

**<sup>1</sup>H NMR (500 MHz, CD<sub>3</sub>OD) and <sup>13</sup>C NMR (126 MHz, CD<sub>3</sub>OD) spectra for 40d:**

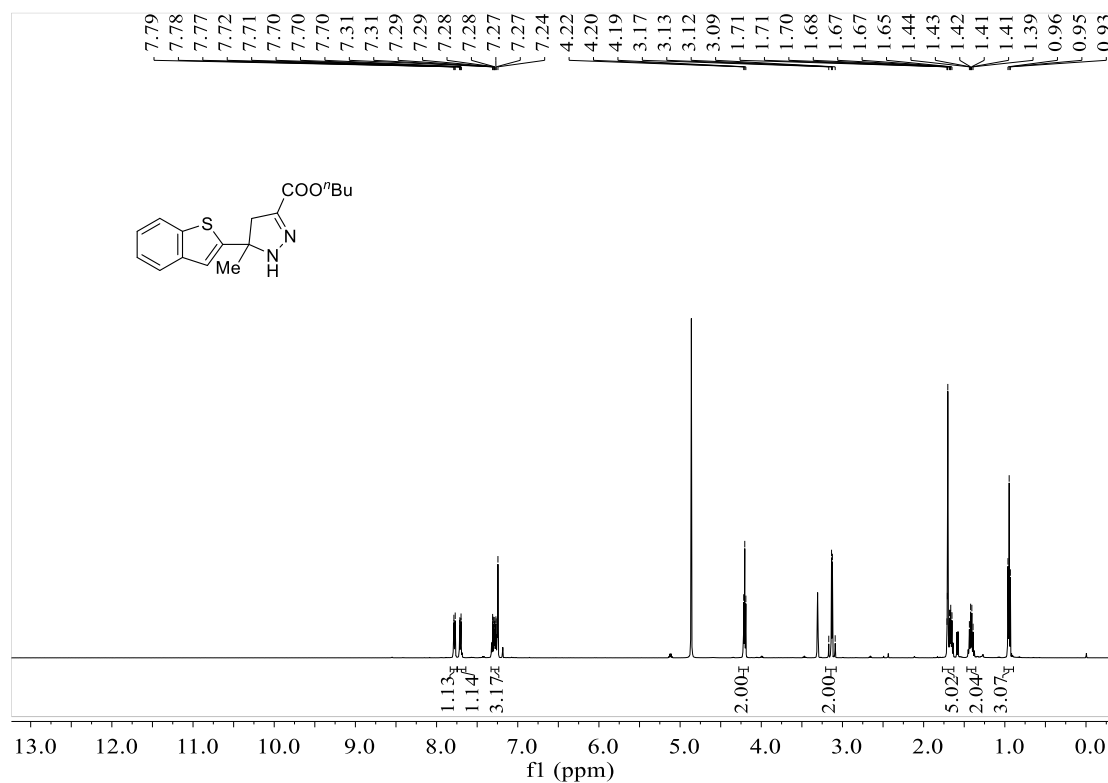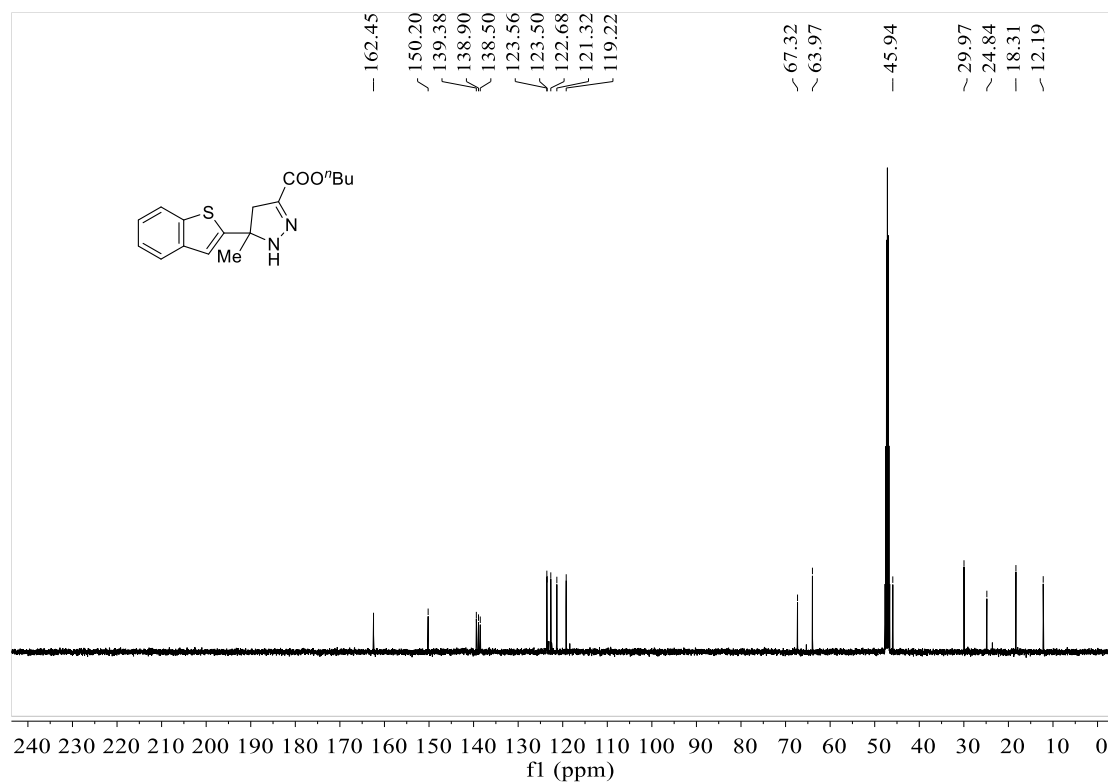

**<sup>1</sup>H NMR (500 MHz, CD<sub>3</sub>OD) and <sup>13</sup>C NMR (126 MHz, CD<sub>3</sub>OD) spectra for 41d:**

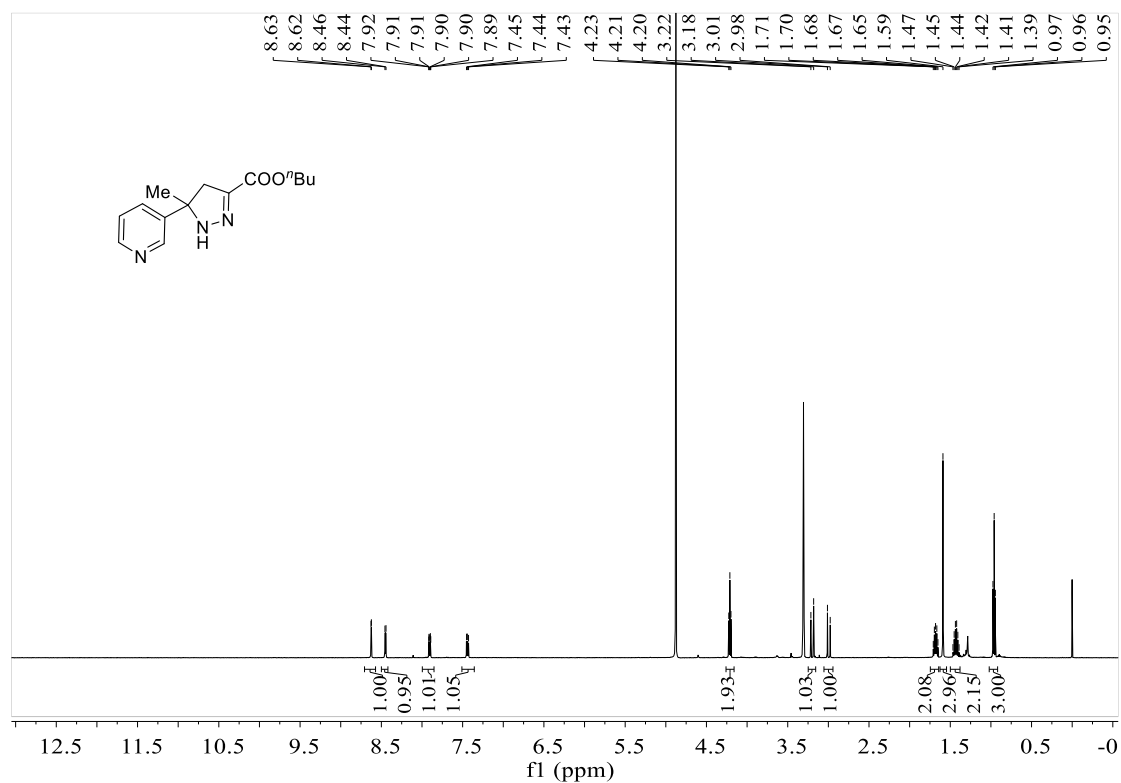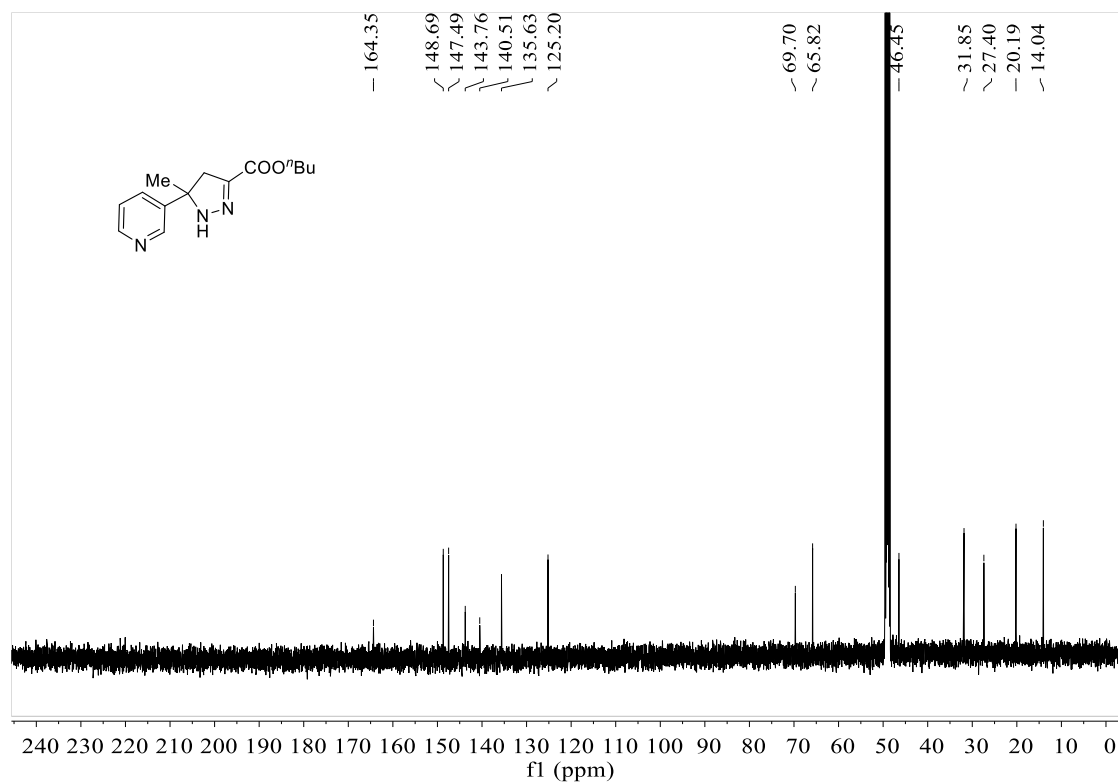

**<sup>1</sup>H NMR (500 MHz, CD<sub>3</sub>OD) and <sup>13</sup>C NMR (126 MHz, CD<sub>3</sub>OD) spectra for 42d:**

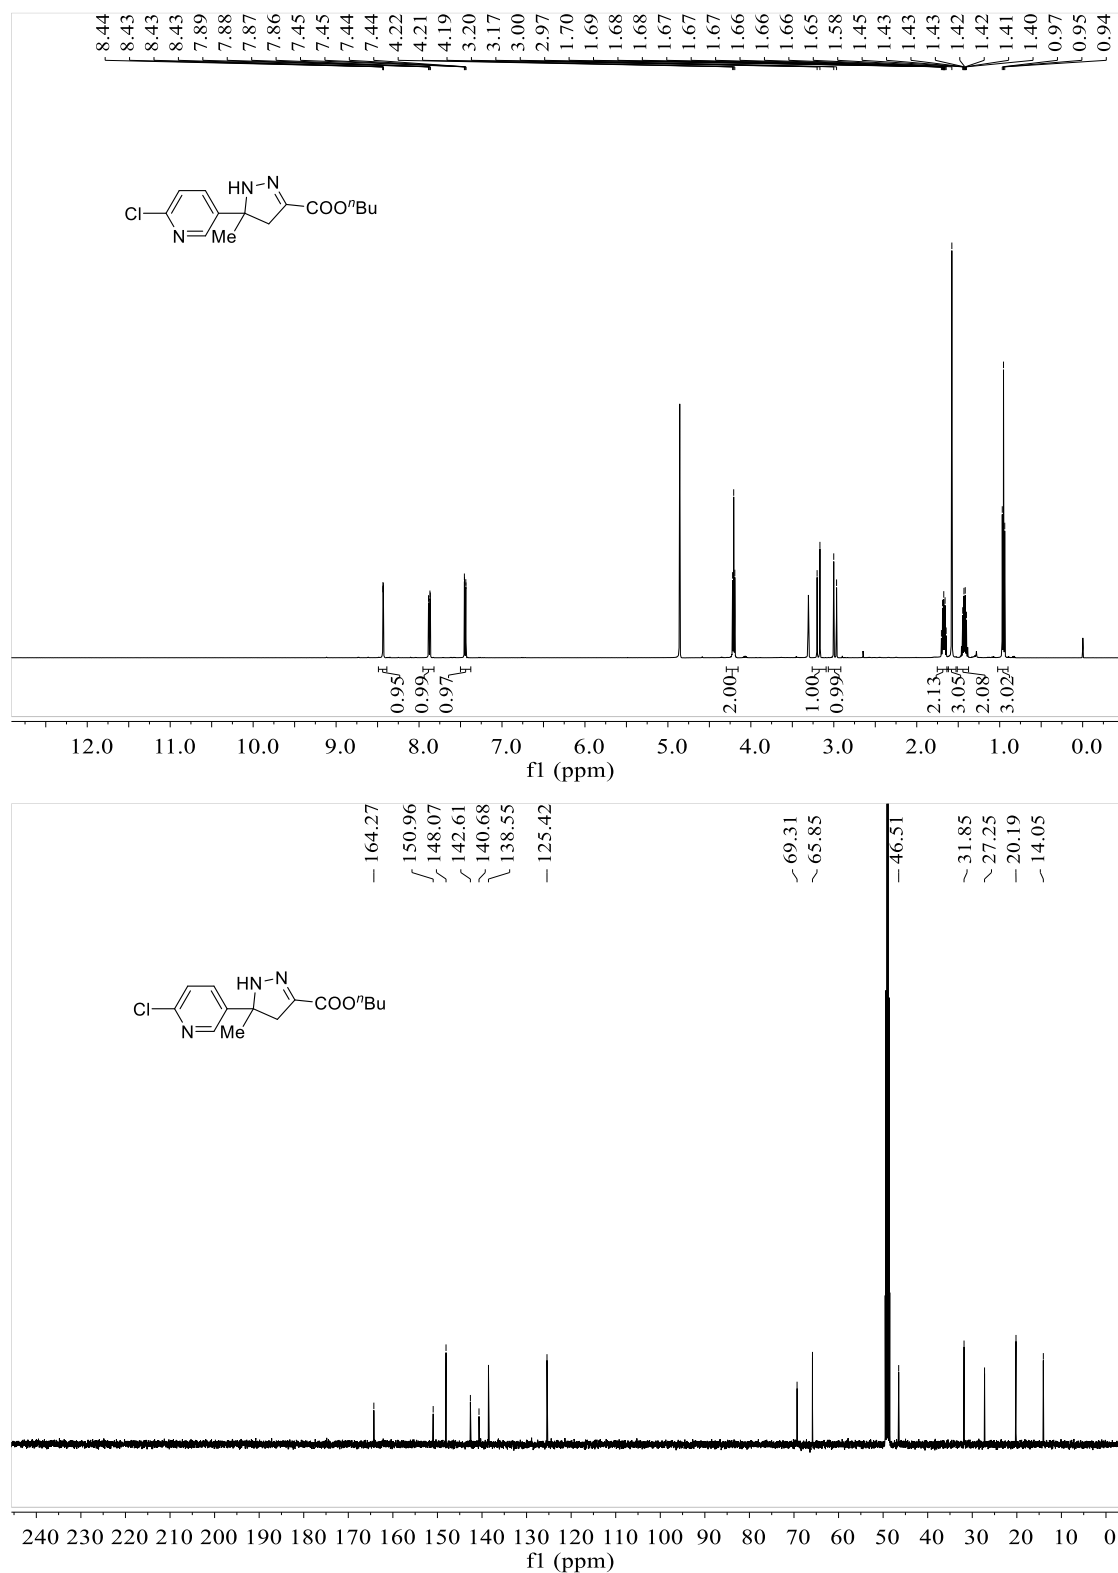

**$^1\text{H}$  NMR (500 MHz,  $\text{CD}_3\text{OD}$ ) and  $^{13}\text{C}$  NMR (126 MHz,  $\text{CD}_3\text{OD}$ ) spectra for **43d**:**

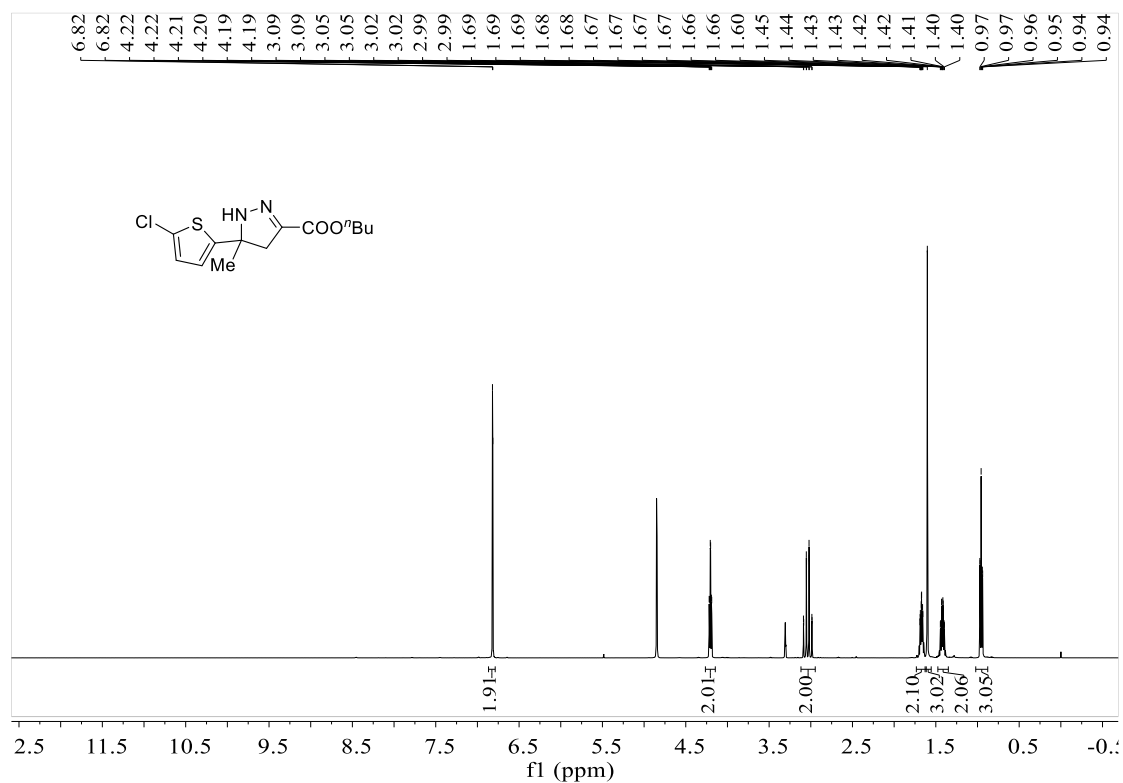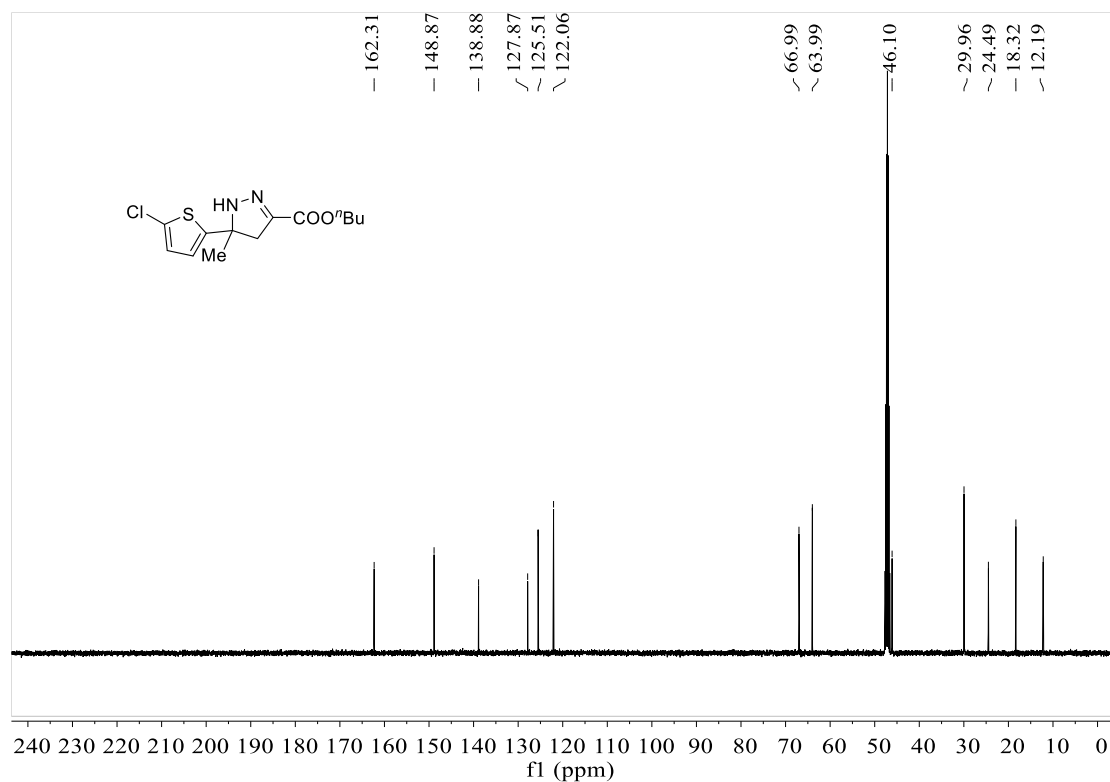



**<sup>1</sup>H NMR (500 MHz, CD<sub>3</sub>OD) and <sup>13</sup>C NMR (126 MHz, CD<sub>3</sub>OD) spectra for 44d:**

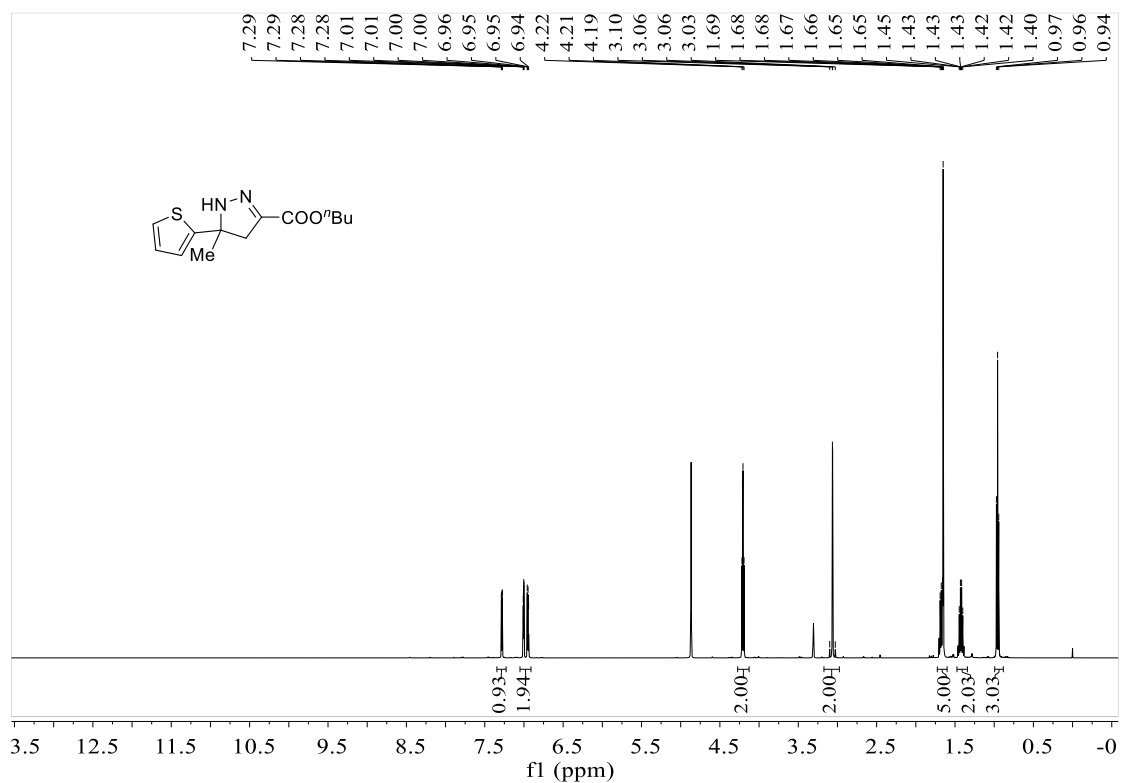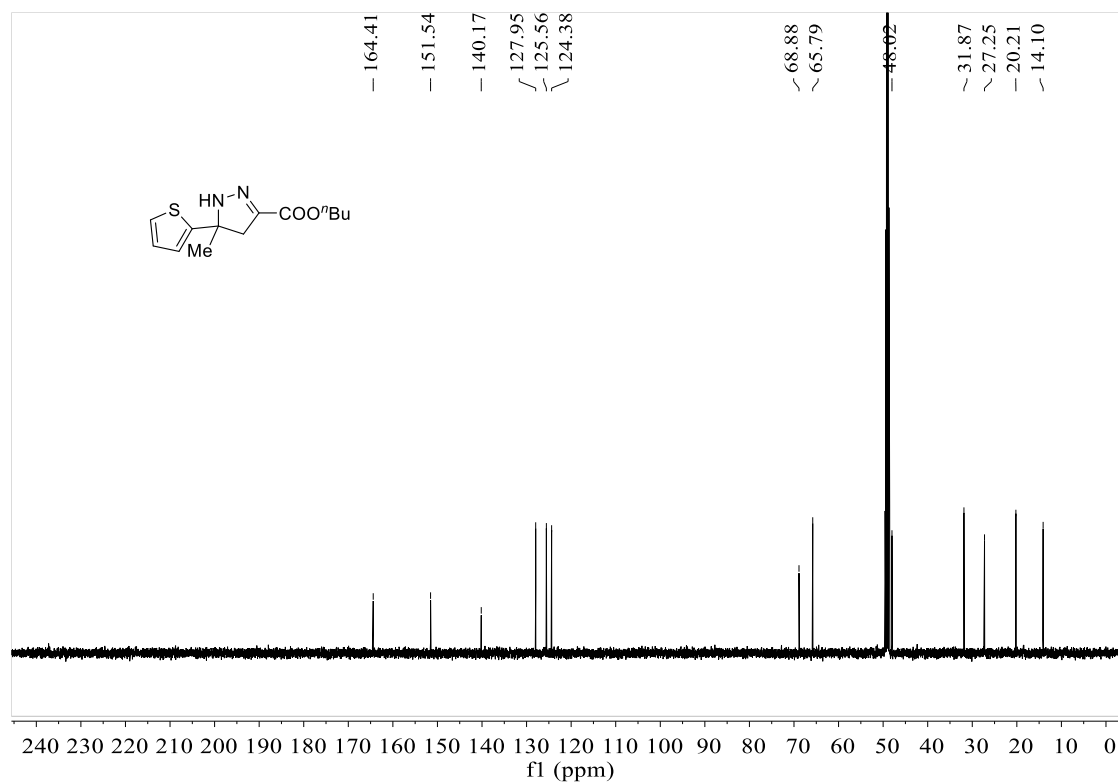

**<sup>1</sup>H NMR (500 MHz, CDCl<sub>3</sub>) and <sup>13</sup>C NMR (126 MHz, CDCl<sub>3</sub>) spectra for 45d:**

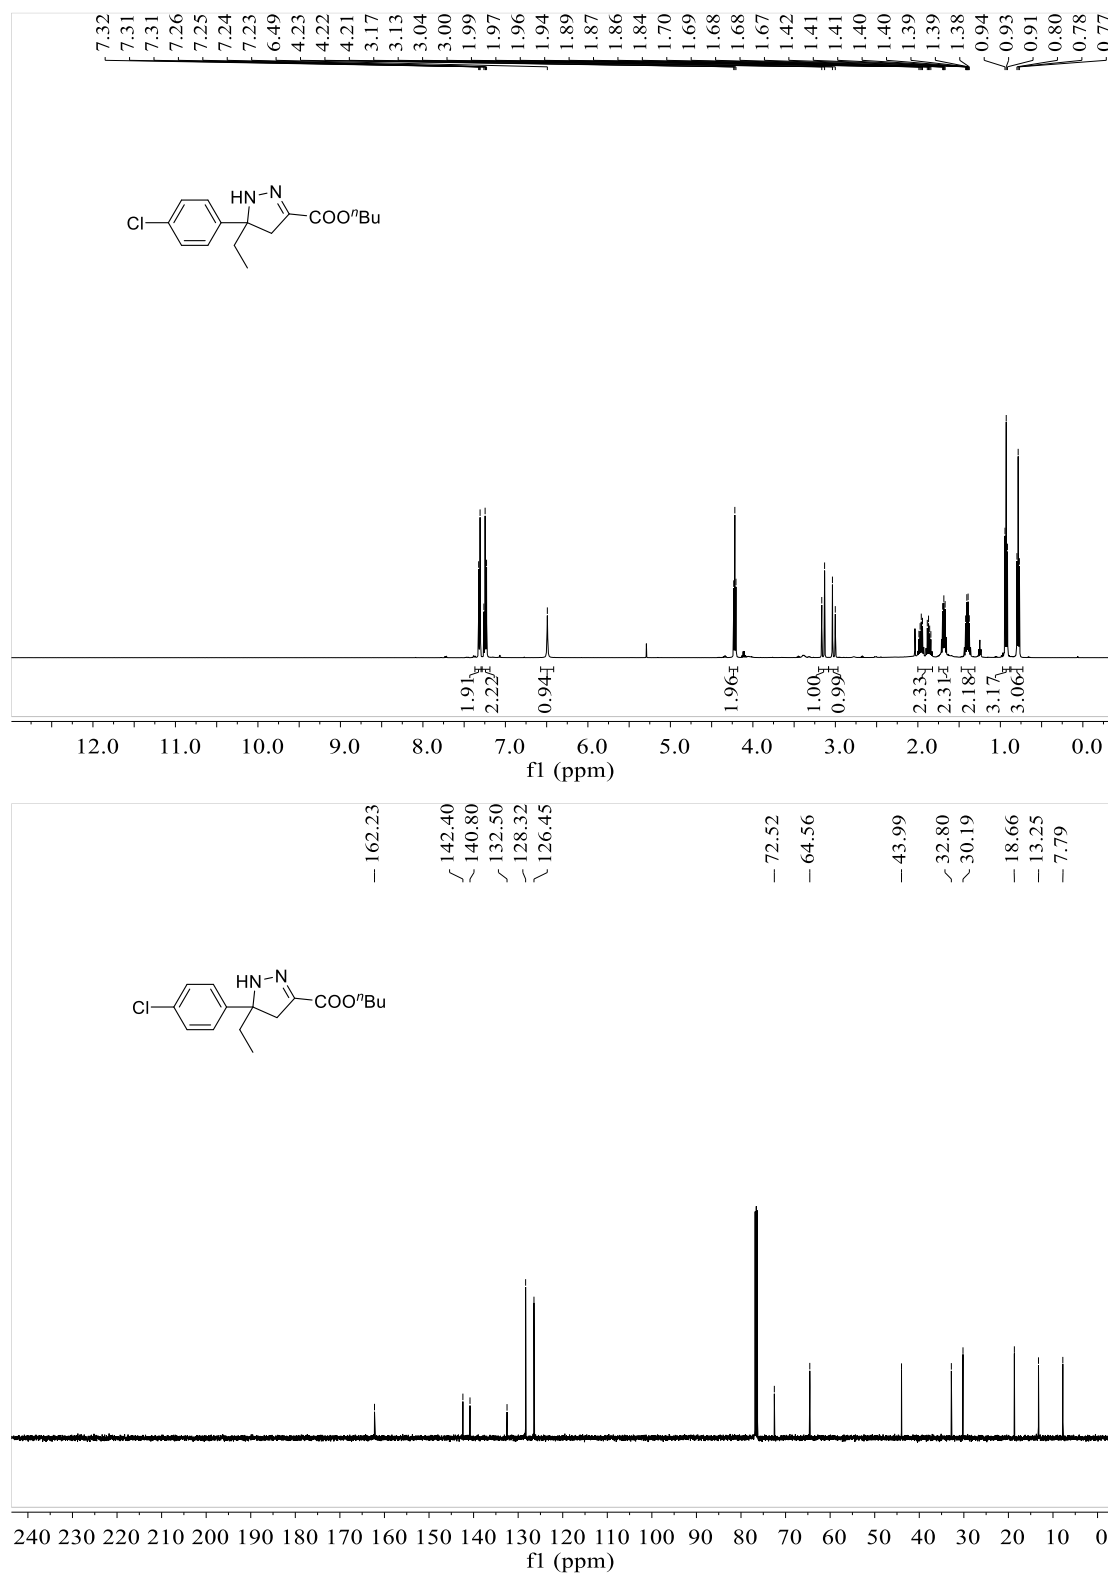

**<sup>1</sup>H NMR (500 MHz, CD<sub>3</sub>OD) and <sup>13</sup>C NMR (126 MHz, CD<sub>3</sub>OD) spectra for 46d:**

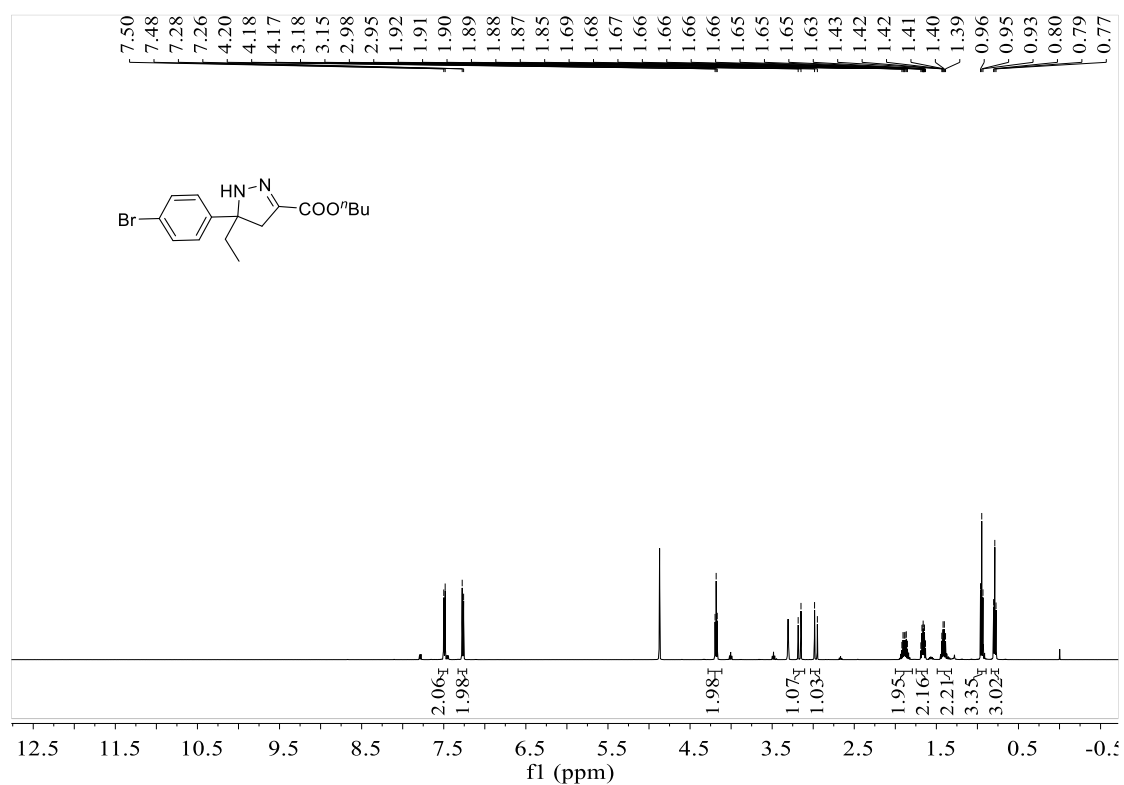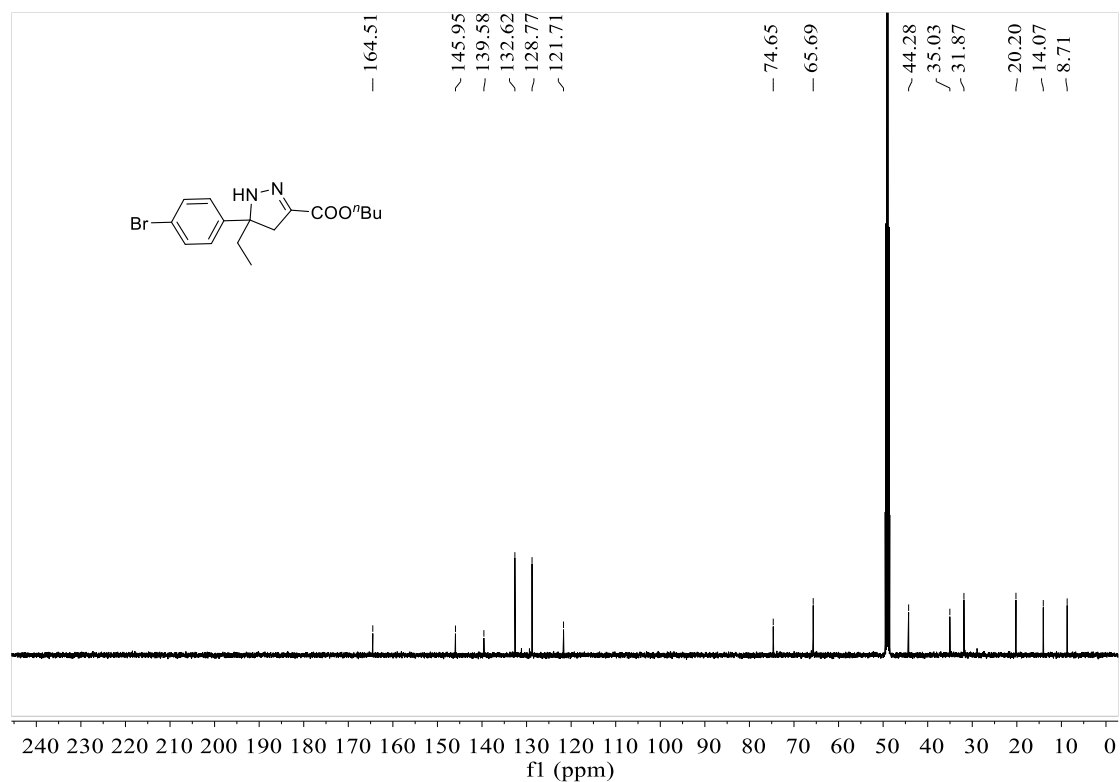

**<sup>1</sup>H NMR (500 MHz, CD<sub>3</sub>OD) and <sup>13</sup>C NMR (126 MHz, CD<sub>3</sub>OD) spectra for 47d:**

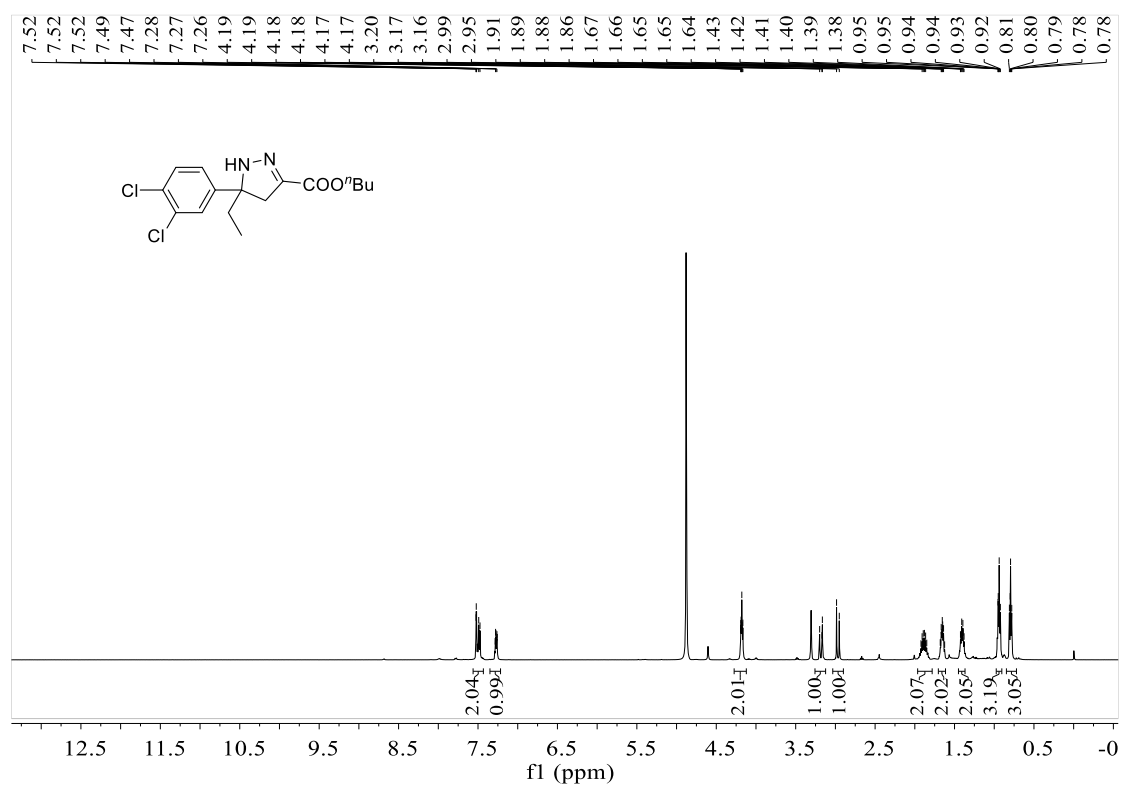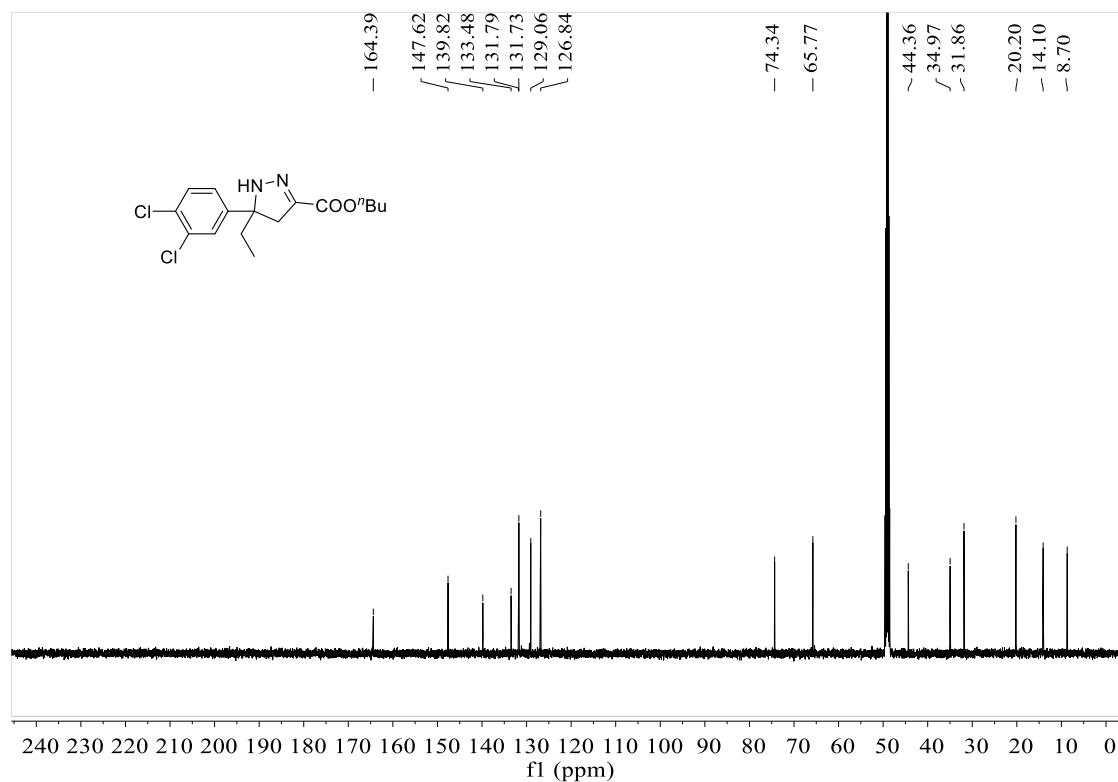

**<sup>1</sup>H NMR (500 MHz, CD<sub>3</sub>OD) and <sup>13</sup>C NMR (126 MHz, CD<sub>3</sub>OD) spectra for 48d:**

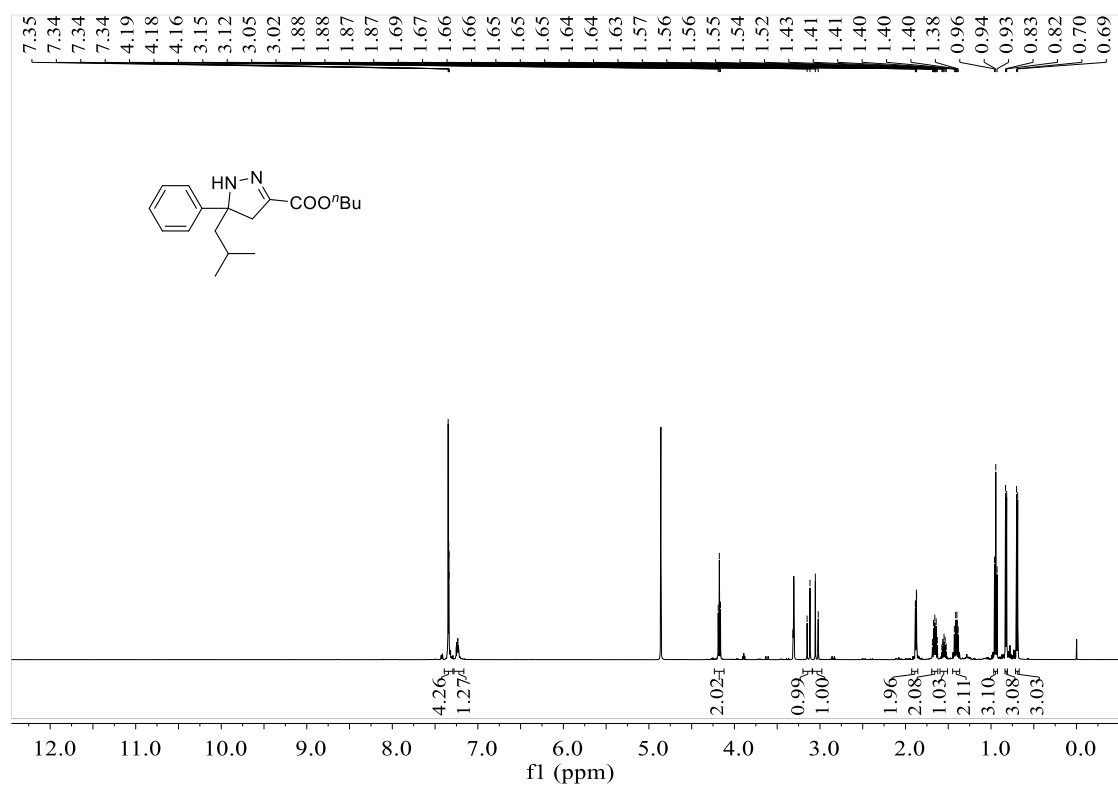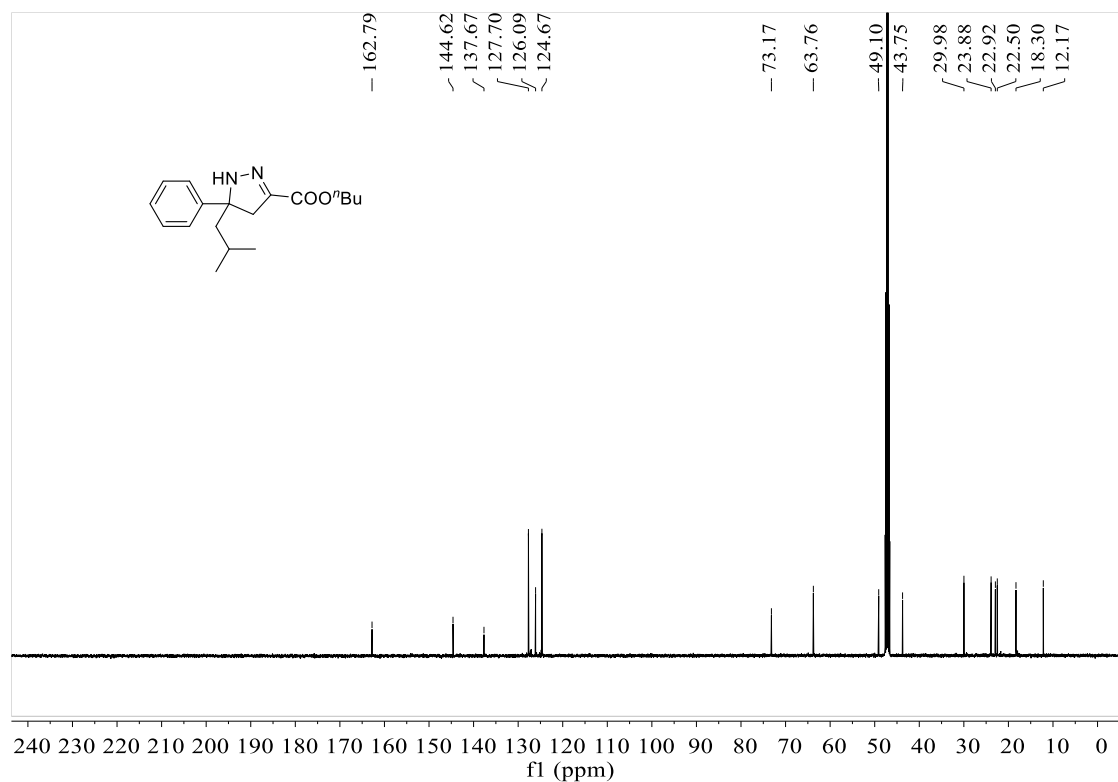

**$^1\text{H}$  NMR (500 MHz,  $\text{CD}_3\text{OD}$ ) and  $^{13}\text{C}$  NMR (126 MHz,  $\text{CD}_3\text{OD}$ ) spectra for **49d**:**

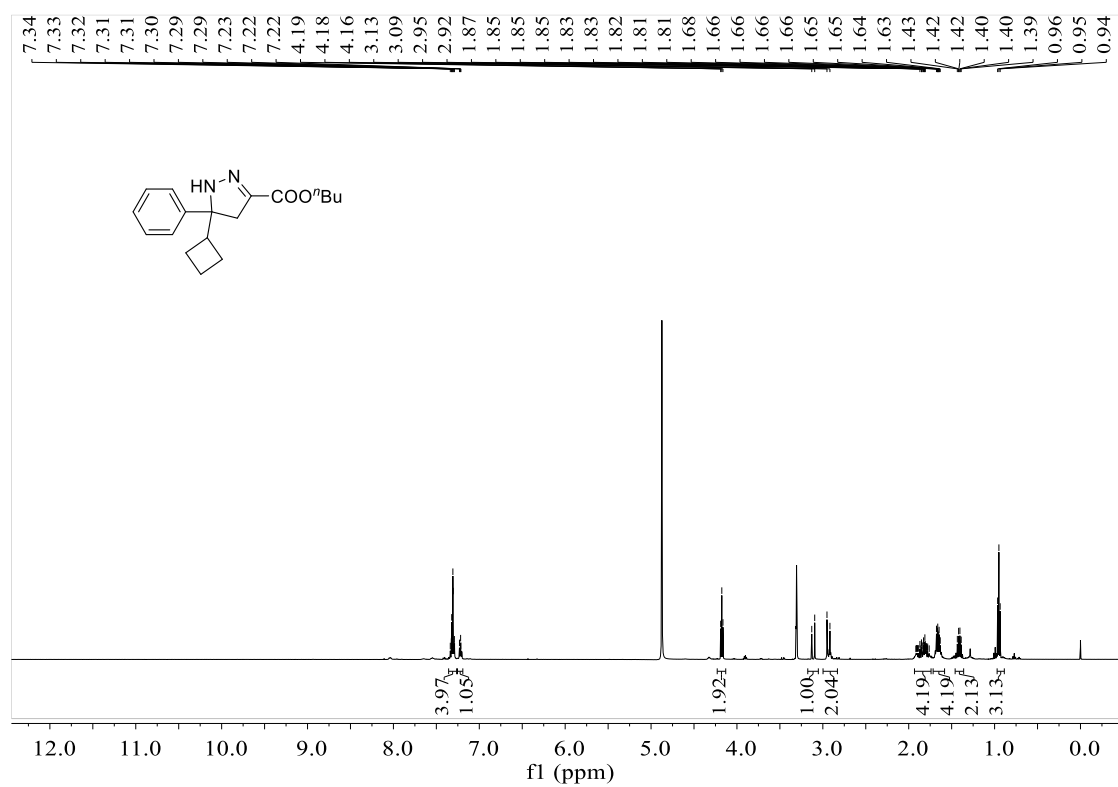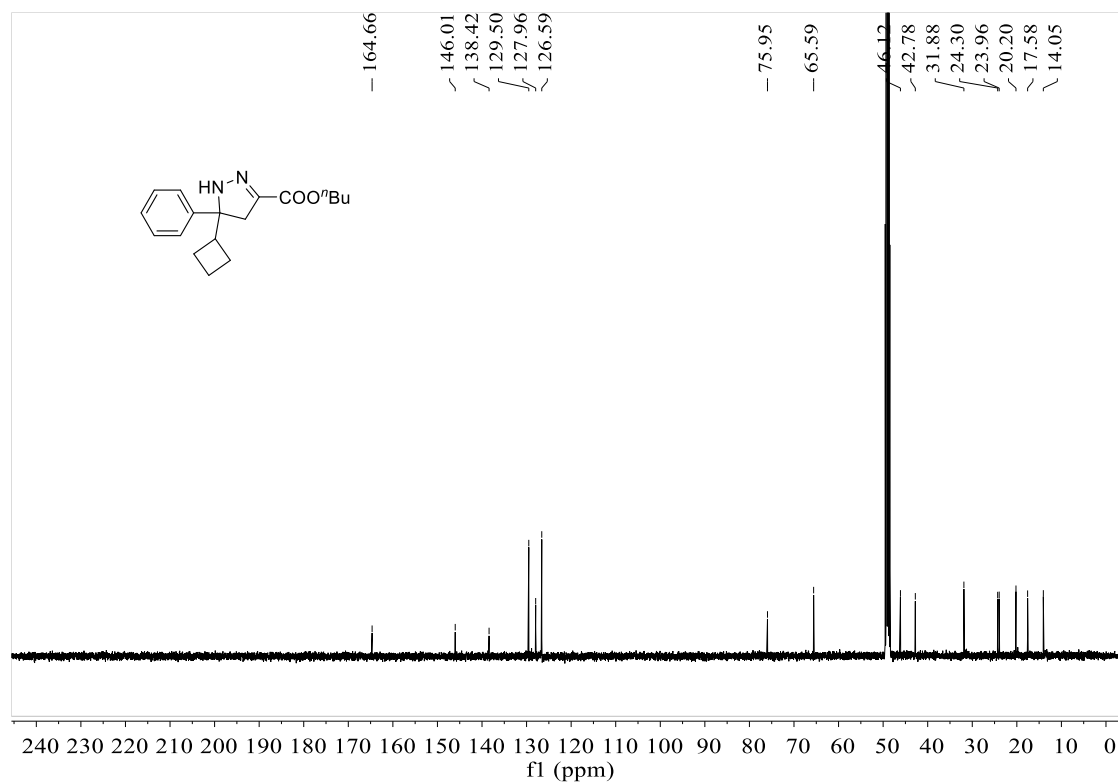

**<sup>1</sup>H NMR (500 MHz, CD<sub>3</sub>OD) and <sup>13</sup>C NMR (126 MHz, CD<sub>3</sub>OD) spectra for 50d:**

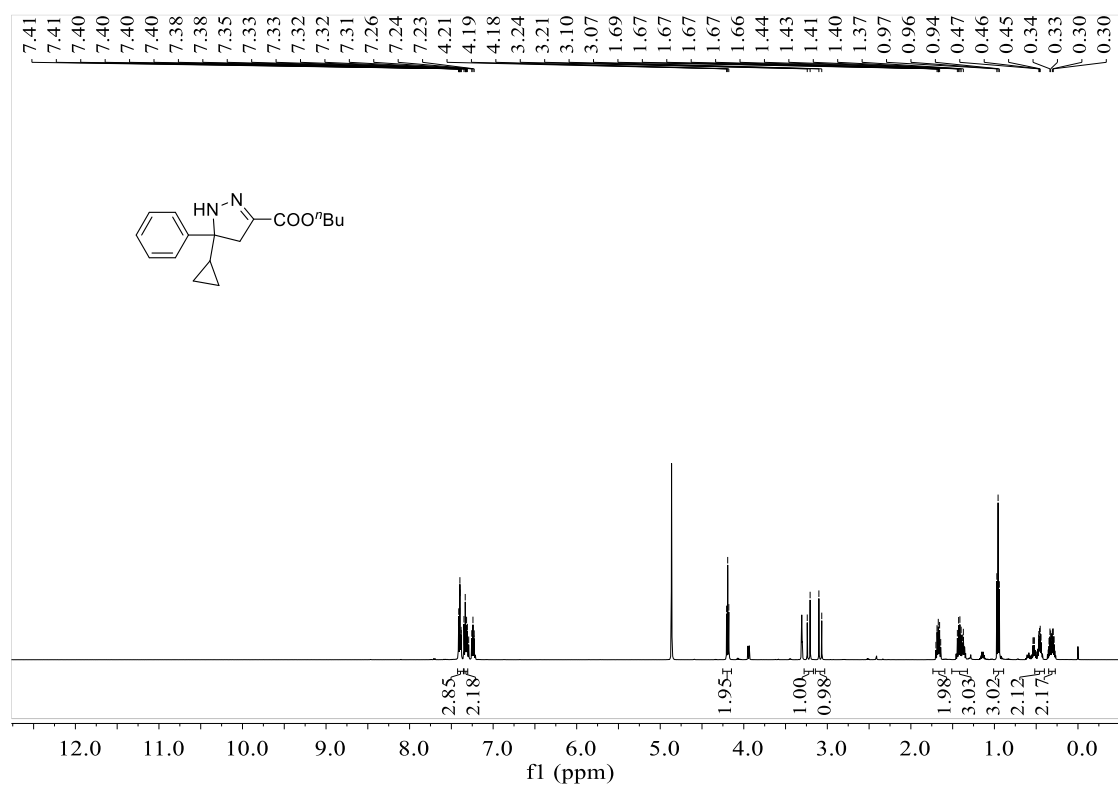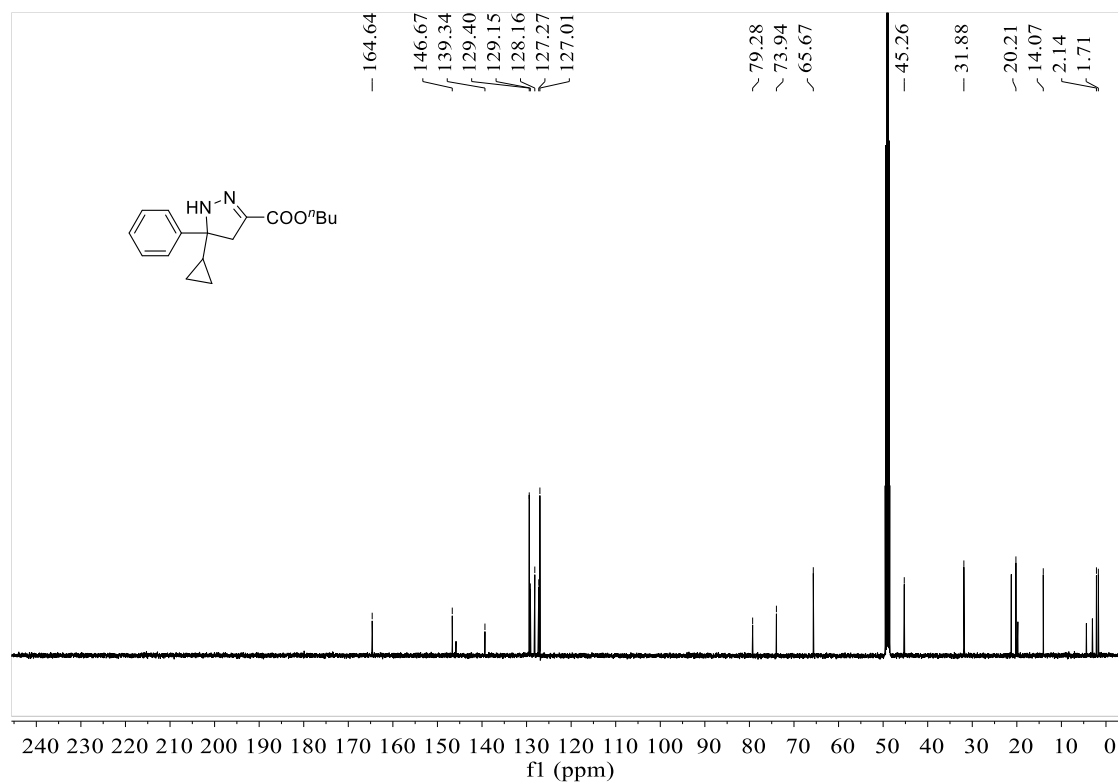

**$^1\text{H}$  NMR (500 MHz,  $\text{CD}_3\text{OD}$ ) and  $^{13}\text{C}$  NMR (126 MHz,  $\text{CD}_3\text{OD}$ ) spectra for **51d**:**

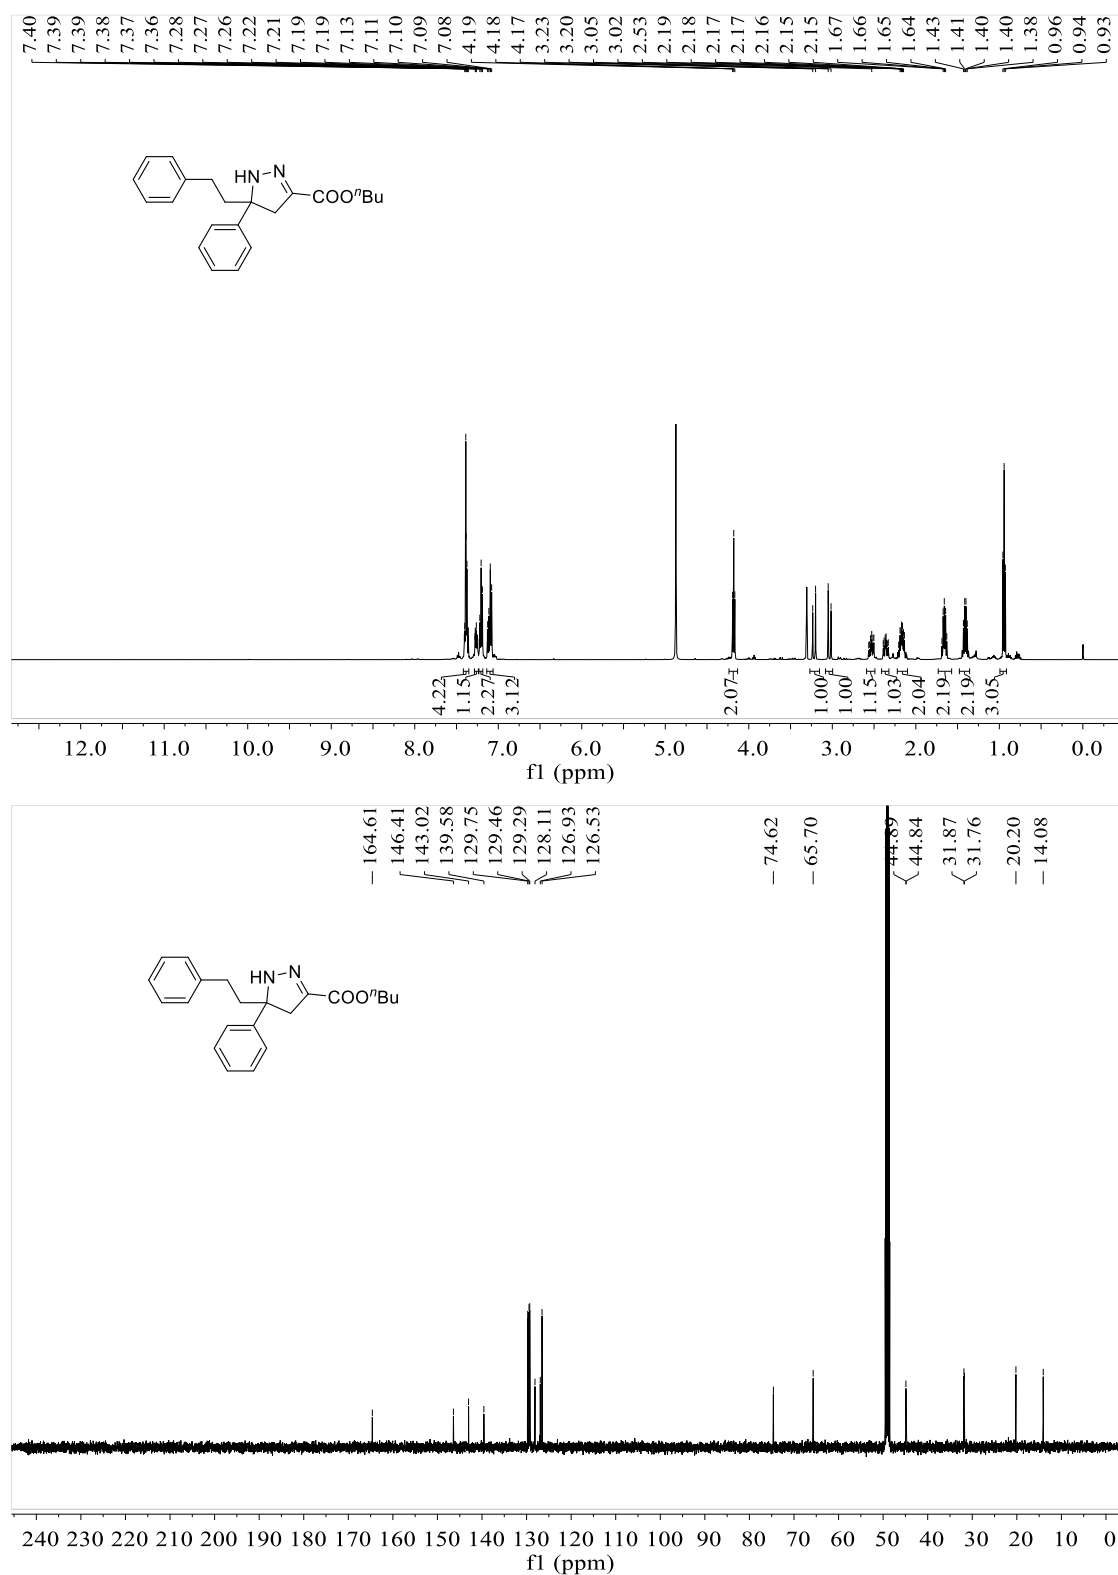



**<sup>1</sup>H NMR (500 MHz, CD<sub>3</sub>OD) and <sup>13</sup>C NMR (126 MHz, CD<sub>3</sub>OD) spectra for **52d**:**

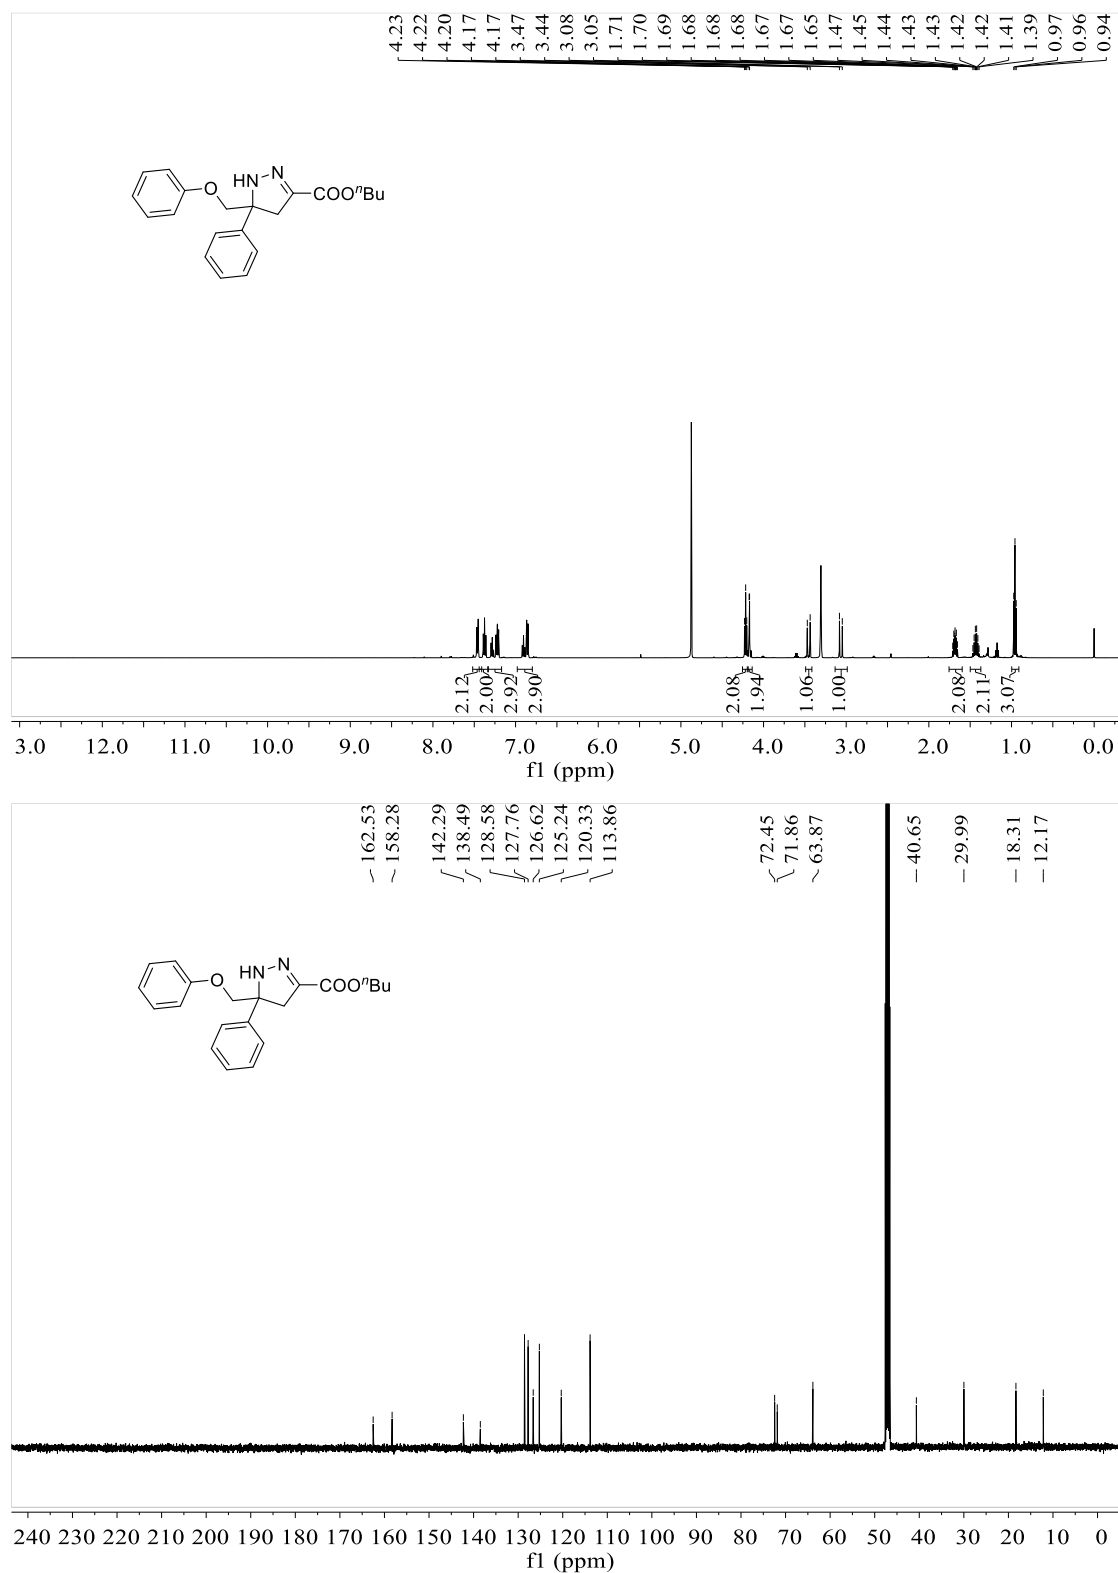

**<sup>1</sup>H NMR (500 MHz, CD<sub>3</sub>OD) and <sup>13</sup>C NMR (126 MHz, CD<sub>3</sub>OD) spectra for **53d**:**

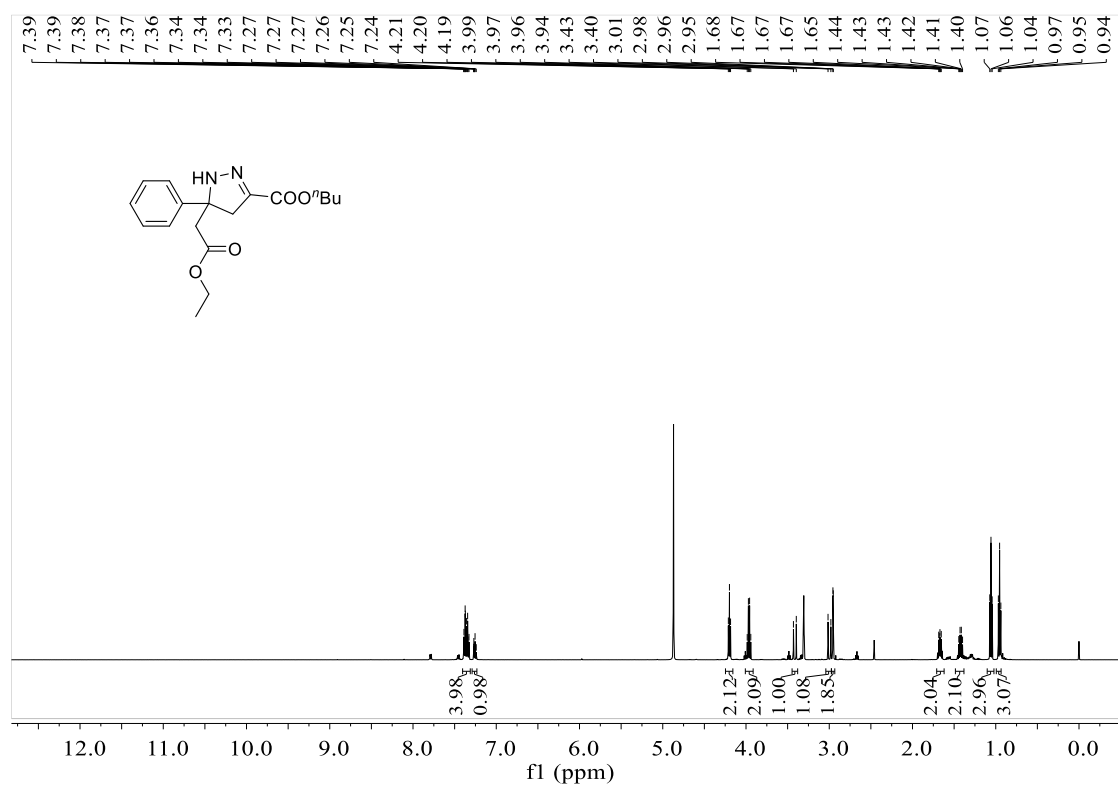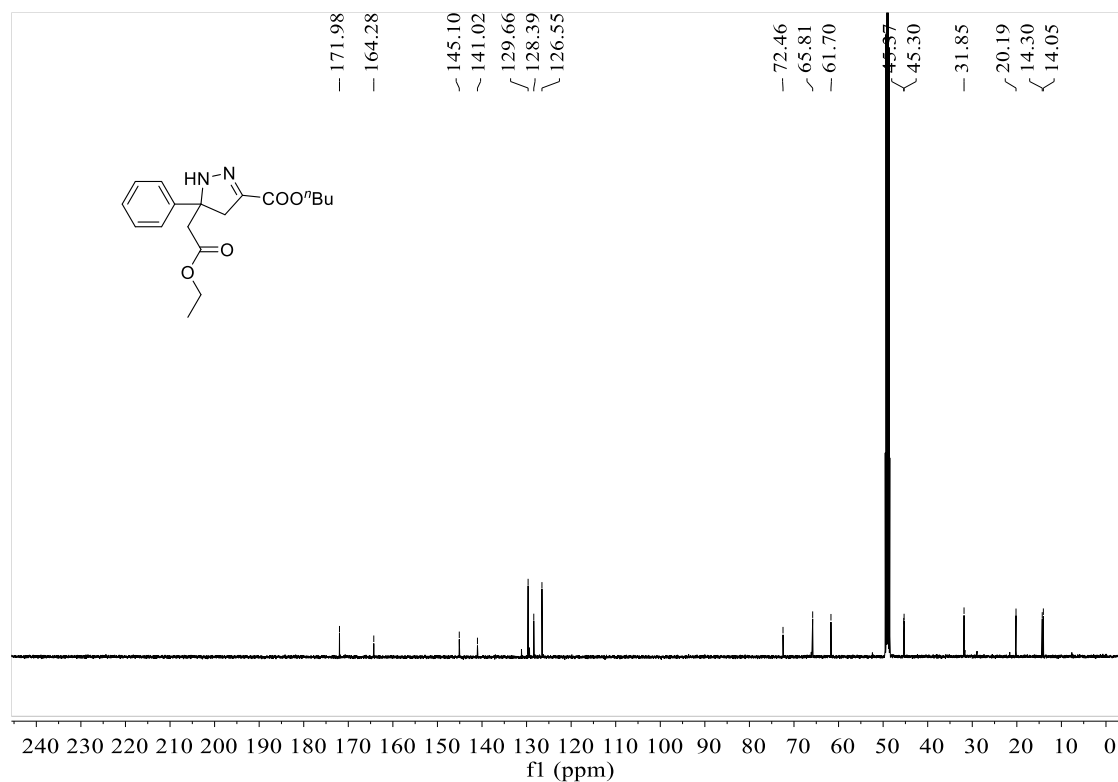

**<sup>1</sup>H NMR (500 MHz, CD<sub>3</sub>OD) and <sup>13</sup>C NMR (126 MHz, CD<sub>3</sub>OD) spectra for 54d:**

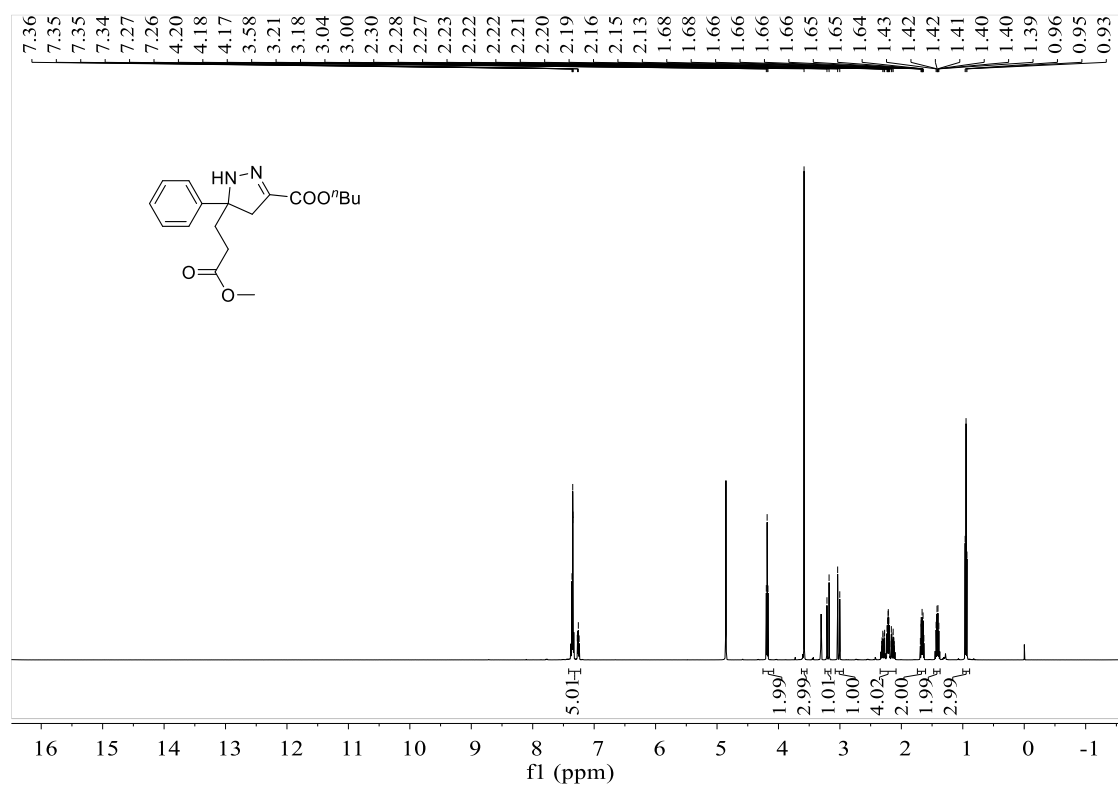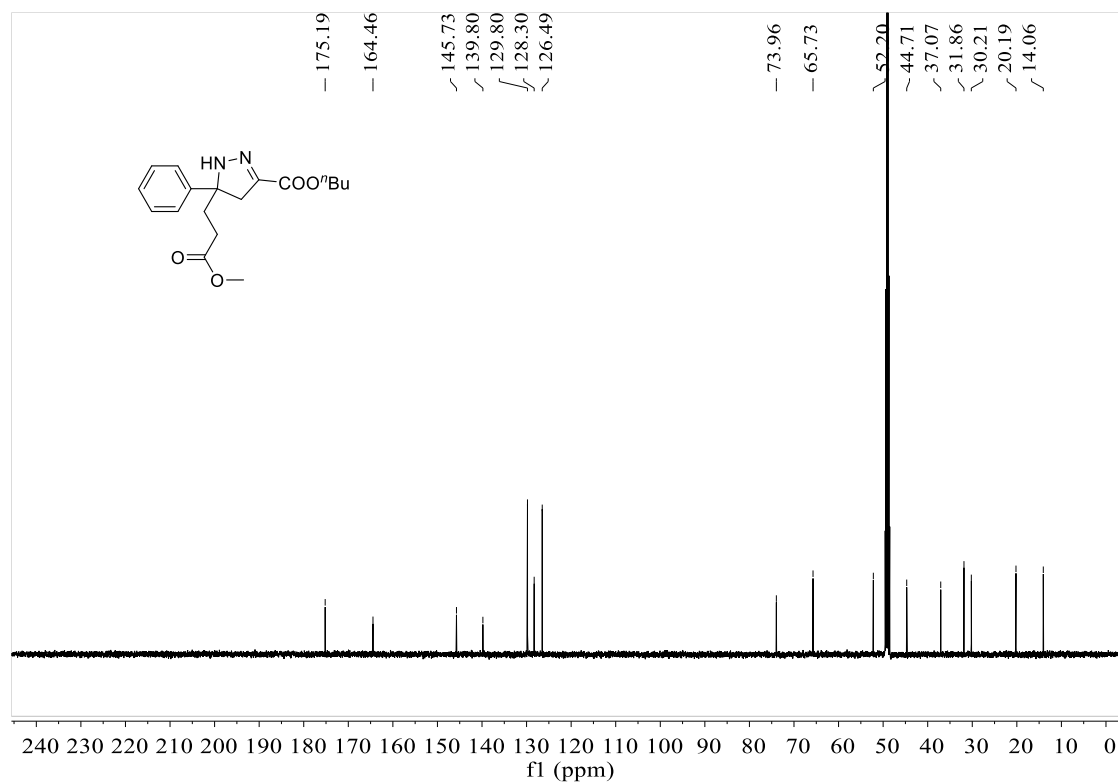

**<sup>1</sup>H NMR (500 MHz, CD<sub>3</sub>OD) and <sup>13</sup>C NMR (126 MHz, CD<sub>3</sub>OD) spectra for **55d**:**

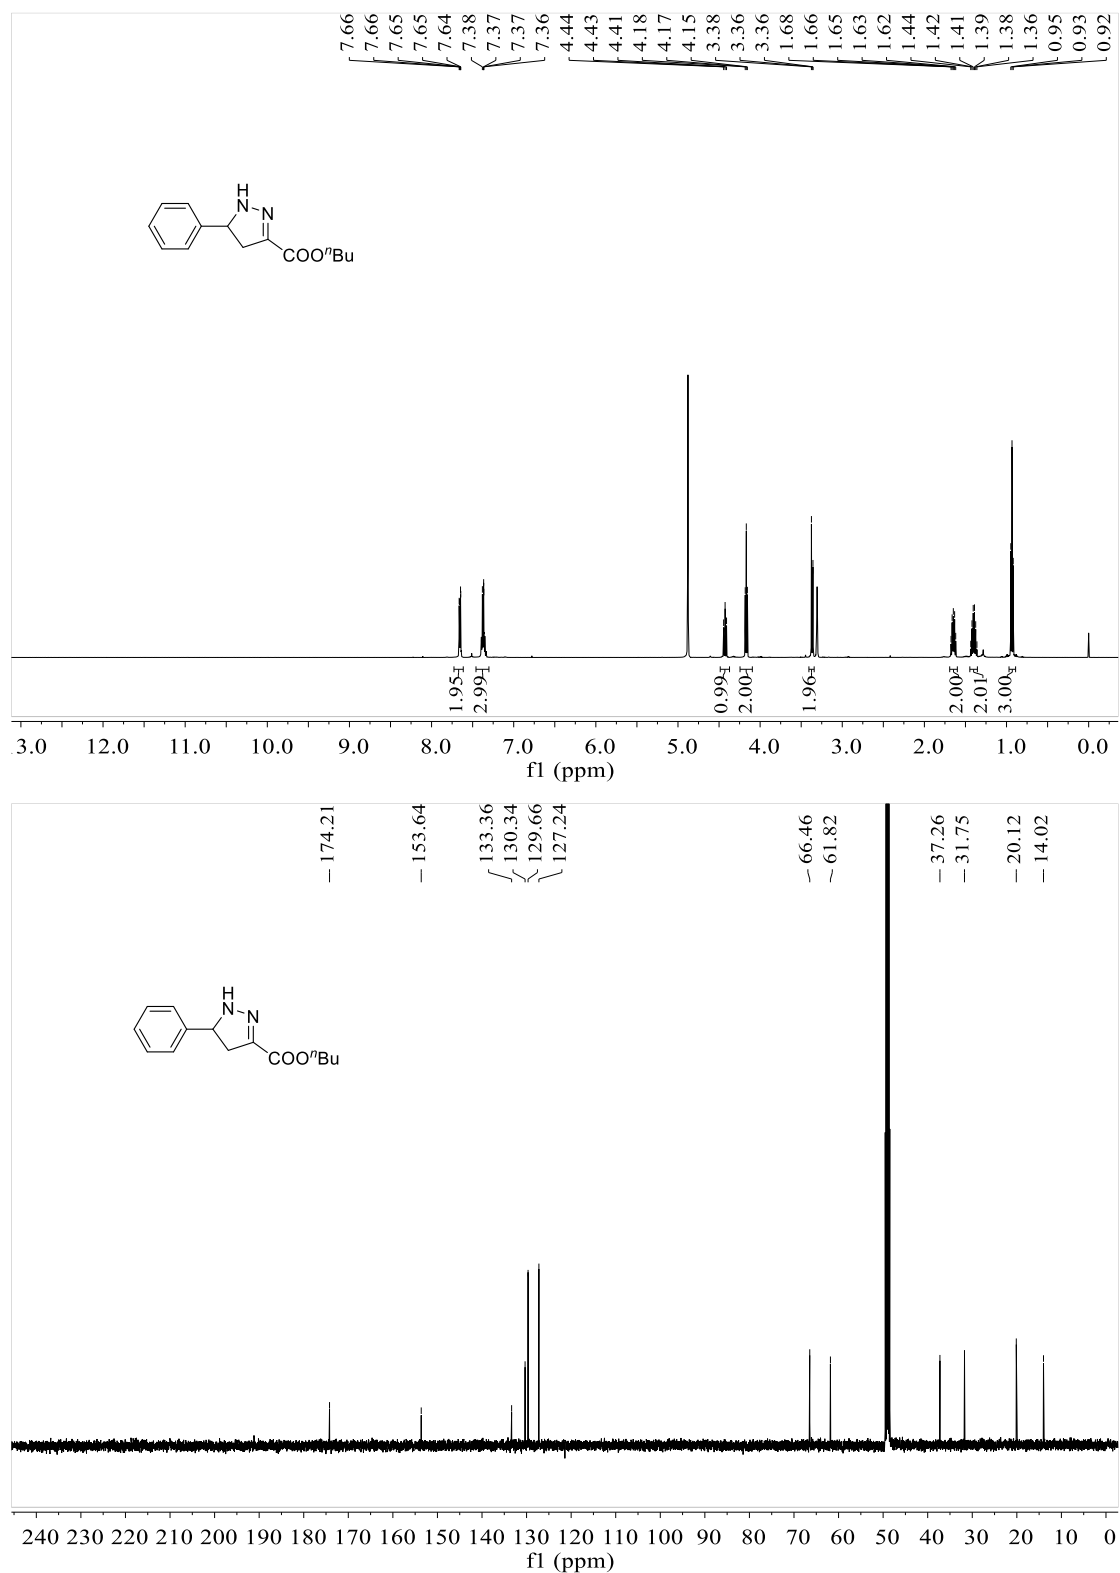

**<sup>1</sup>H NMR (500 MHz, CD<sub>3</sub>OD) and <sup>13</sup>C NMR (126 MHz, CD<sub>3</sub>OD) spectra for **56d**:**

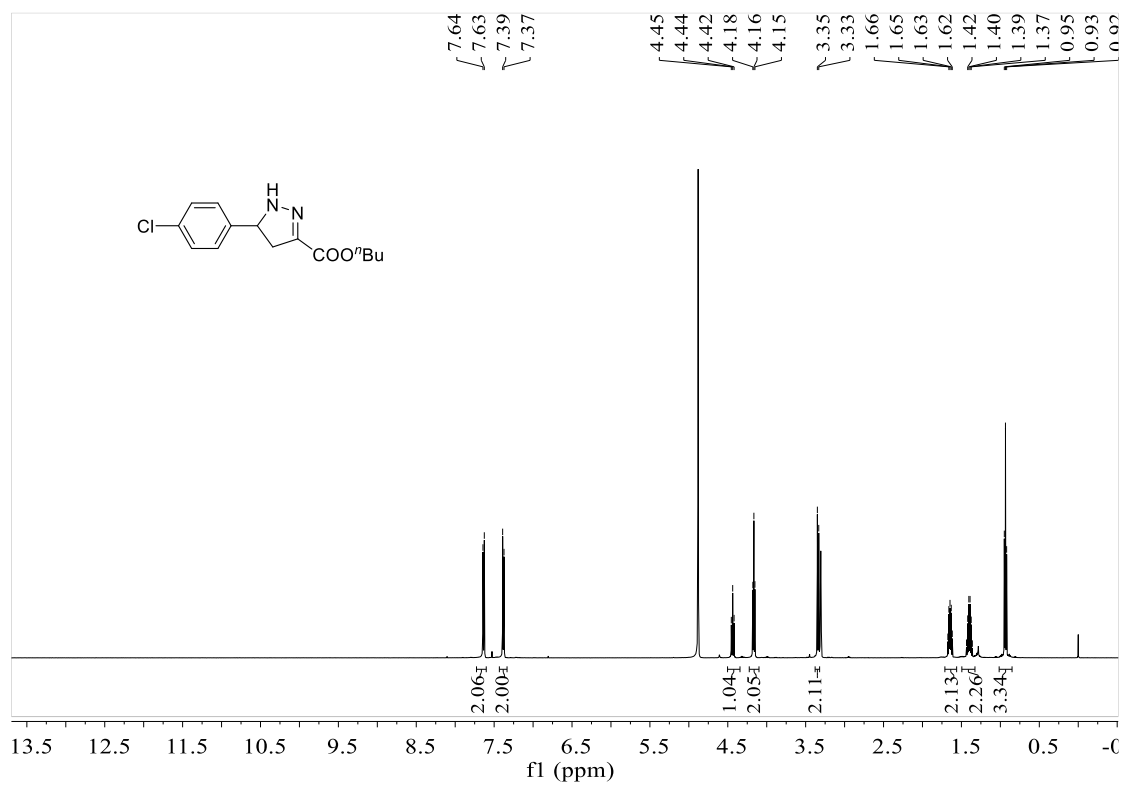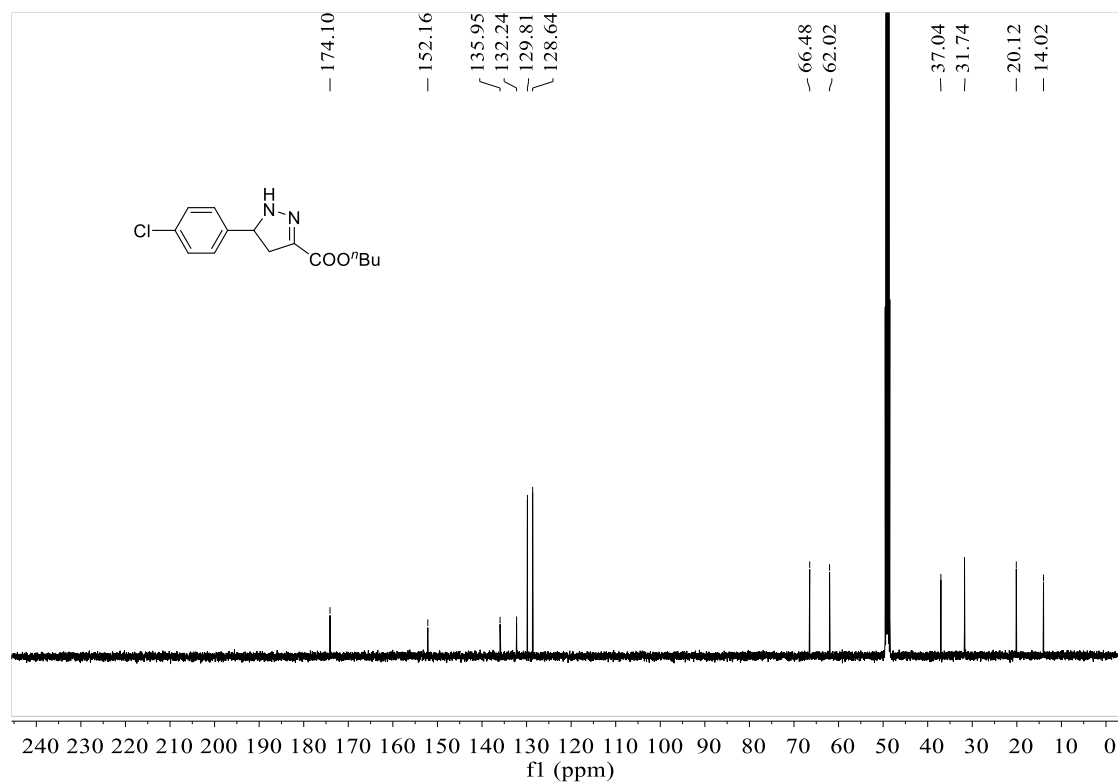

**<sup>1</sup>H NMR (500 MHz, CD<sub>3</sub>OD) and <sup>13</sup>C NMR (126 MHz, CD<sub>3</sub>OD) spectra for **57d**:**

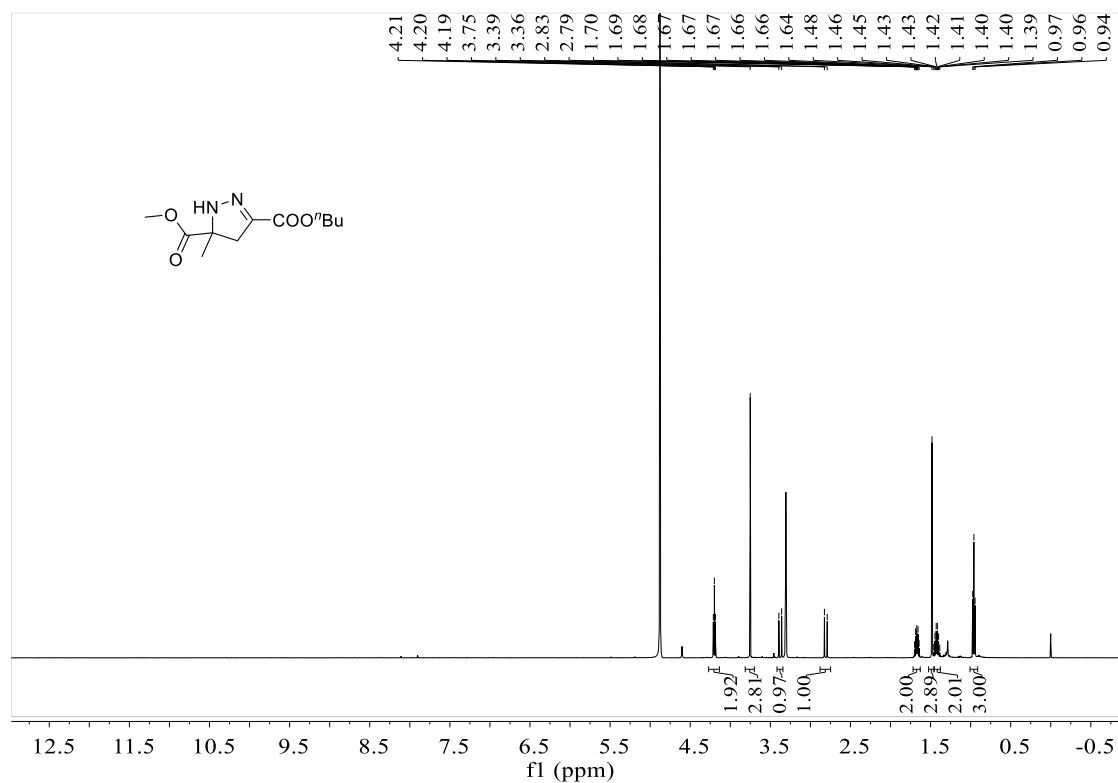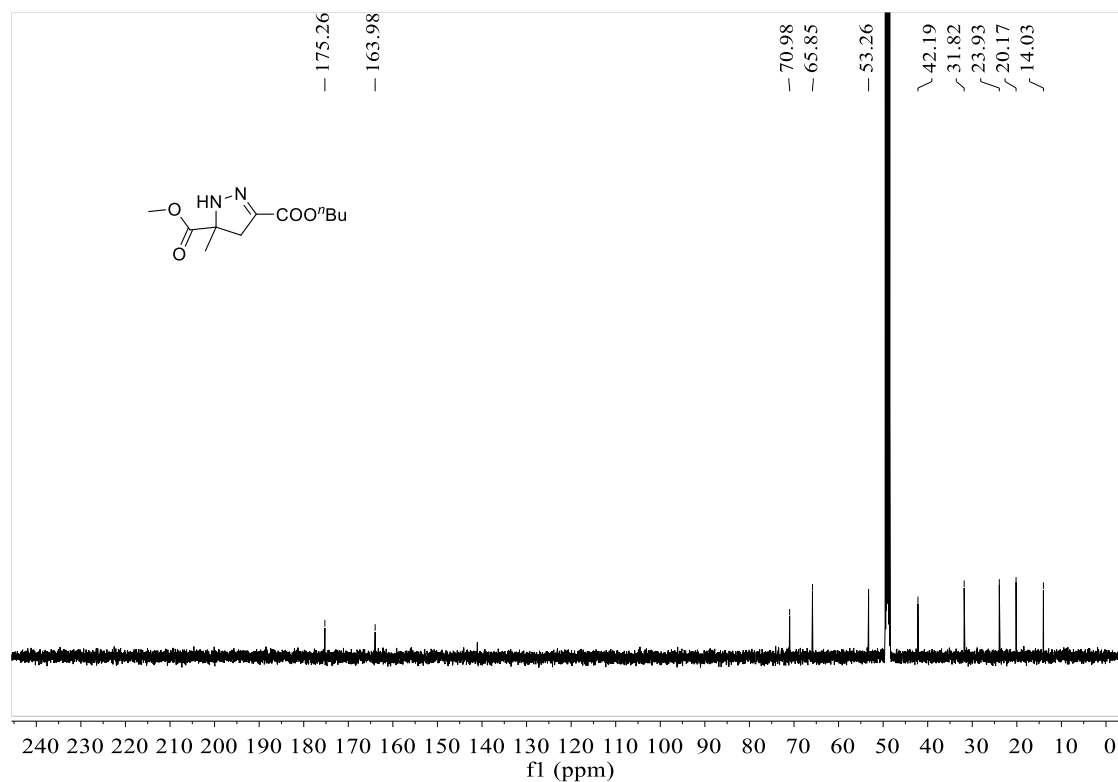

<sup>1</sup>H NMR (500 MHz, CD<sub>3</sub>OD) and <sup>13</sup>C NMR (126 MHz, CD<sub>3</sub>OD) spectra for **58d**:

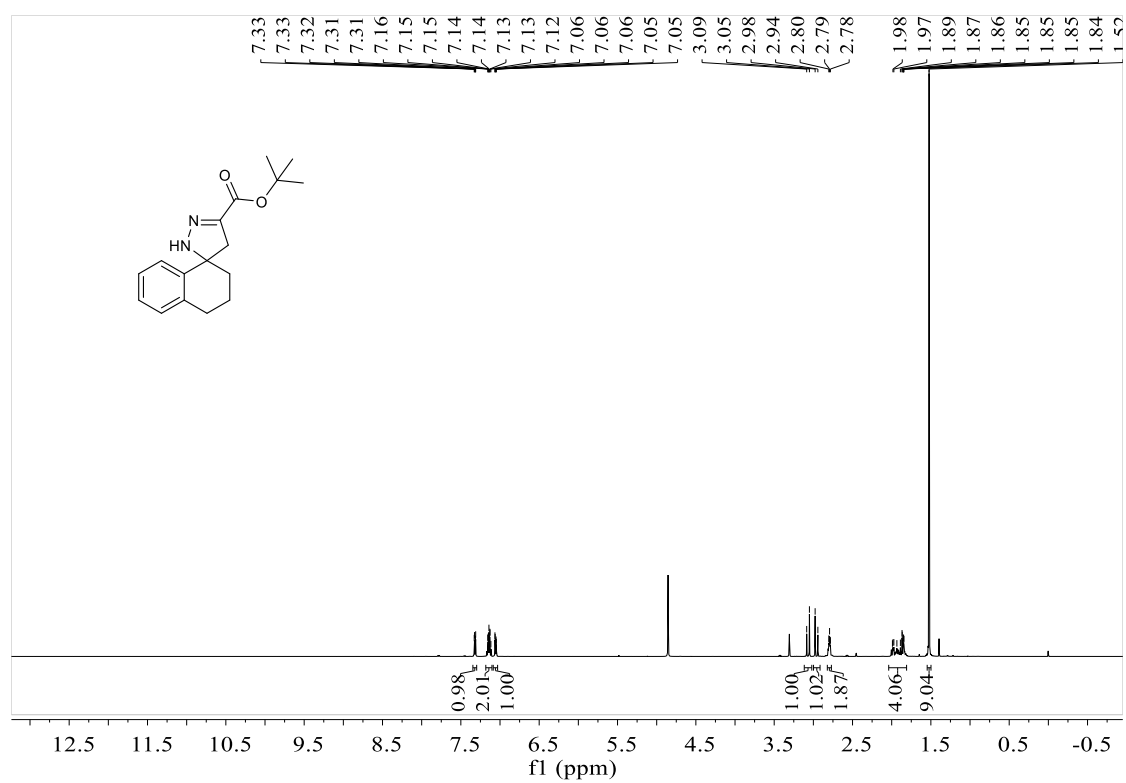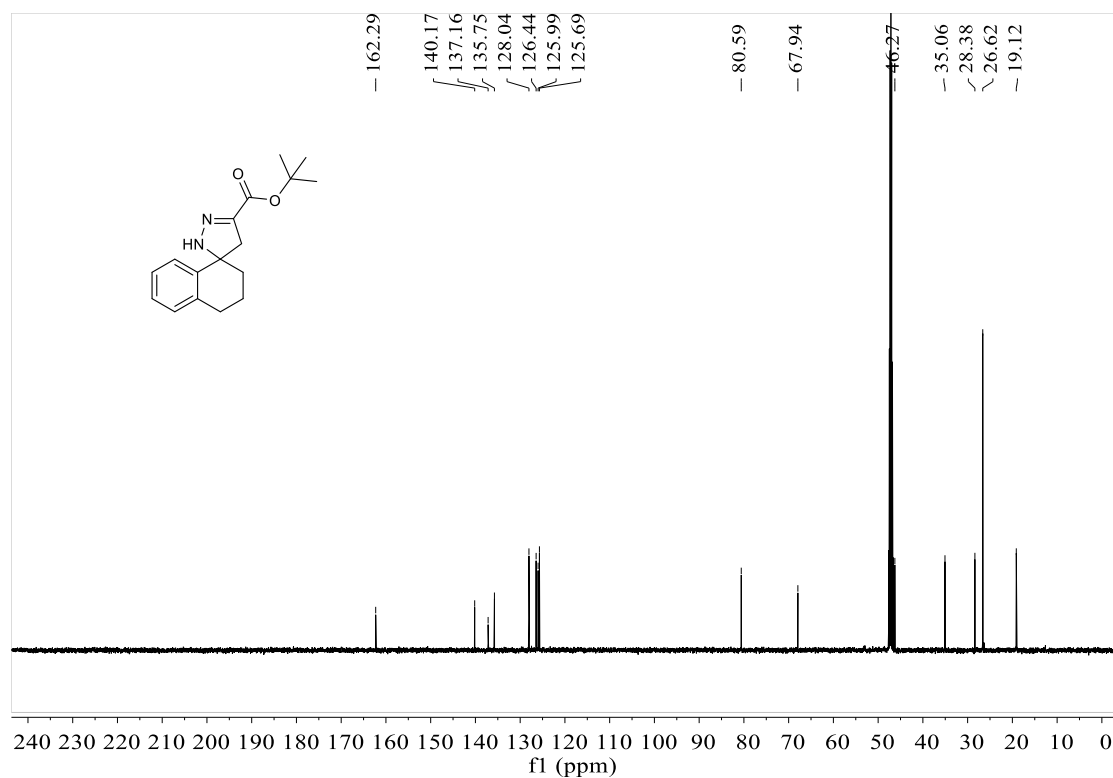

**$^1\text{H}$  NMR (500 MHz,  $\text{CD}_3\text{OD}$ ) and  $^{13}\text{C}$  NMR (126 MHz,  $\text{CD}_3\text{OD}$ ) spectra for **59d**:**

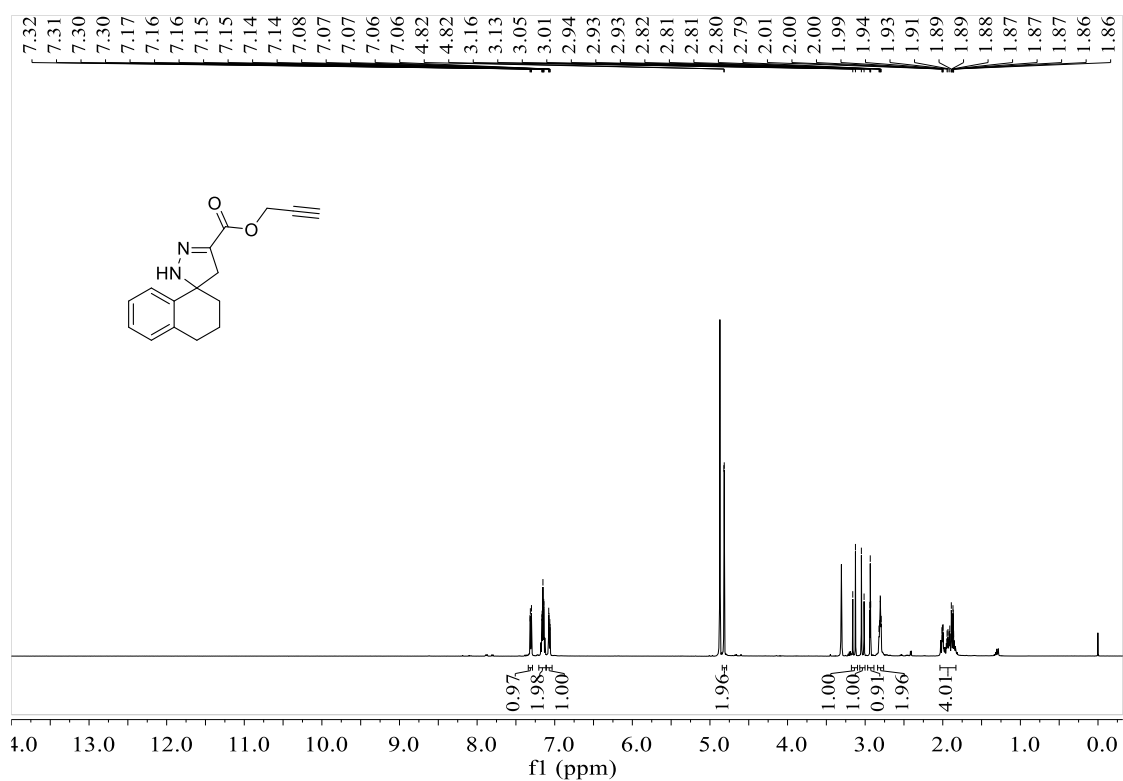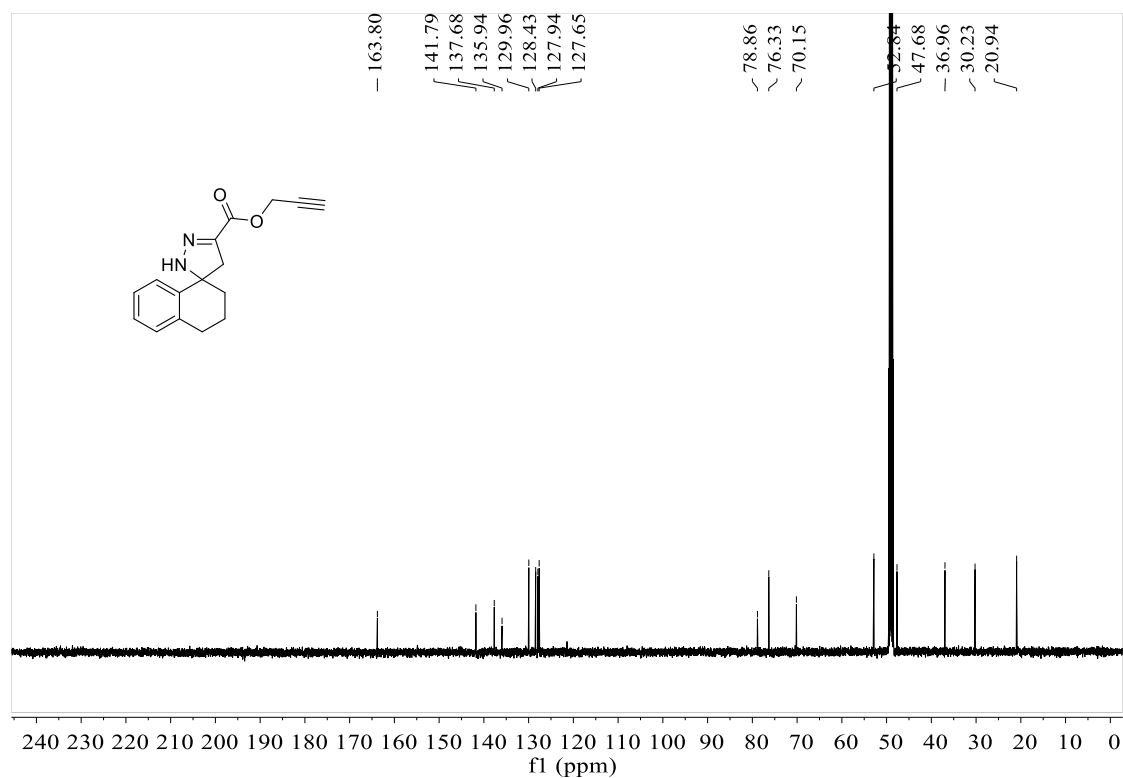



**$^1\text{H}$  NMR (500 MHz,  $\text{CD}_3\text{OD}$ ) and  $^{13}\text{C}$  NMR (126 MHz,  $\text{CD}_3\text{OD}$ ) spectra for **60d**:**

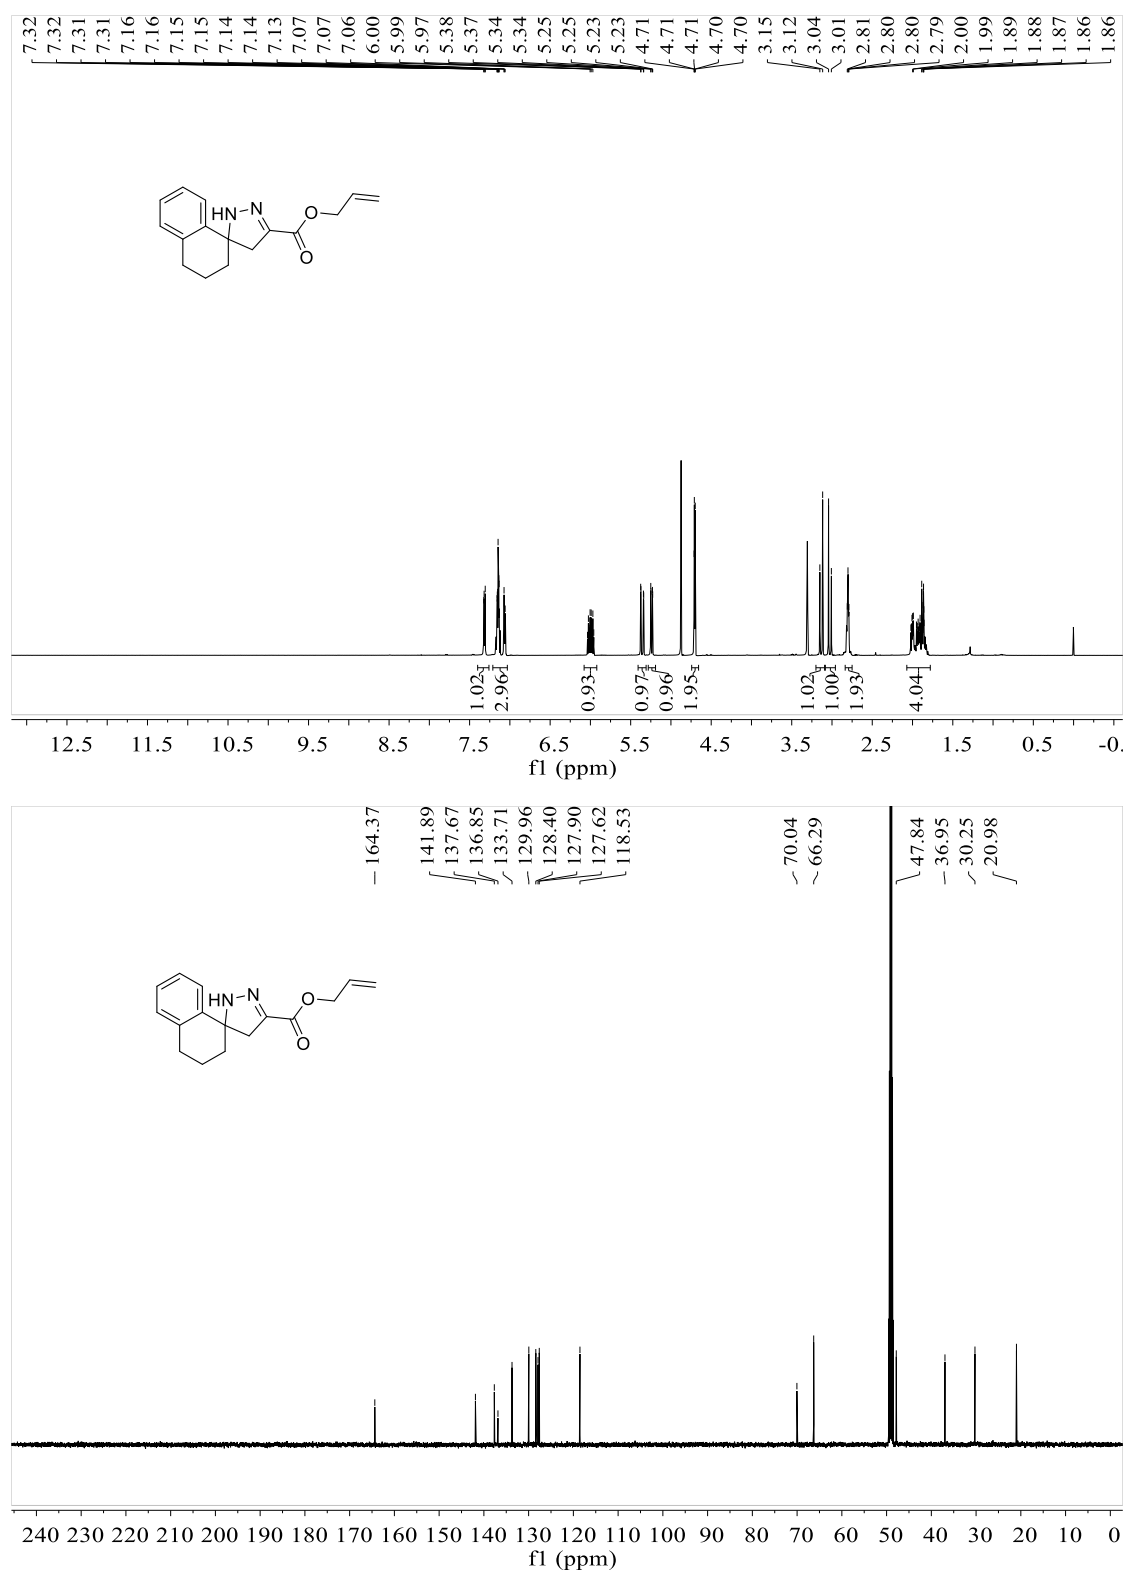

**<sup>1</sup>H NMR (500 MHz, CD<sub>3</sub>OD) and <sup>13</sup>C NMR (126 MHz, CD<sub>3</sub>OD) spectra for **61d**:**

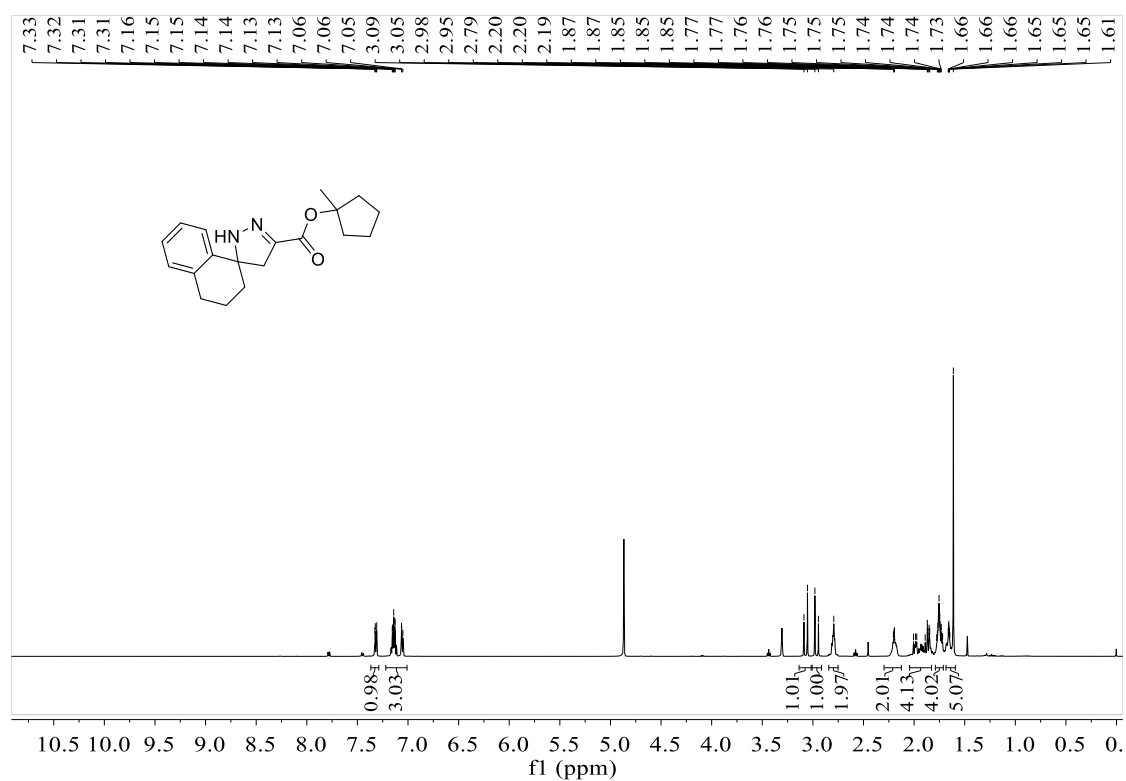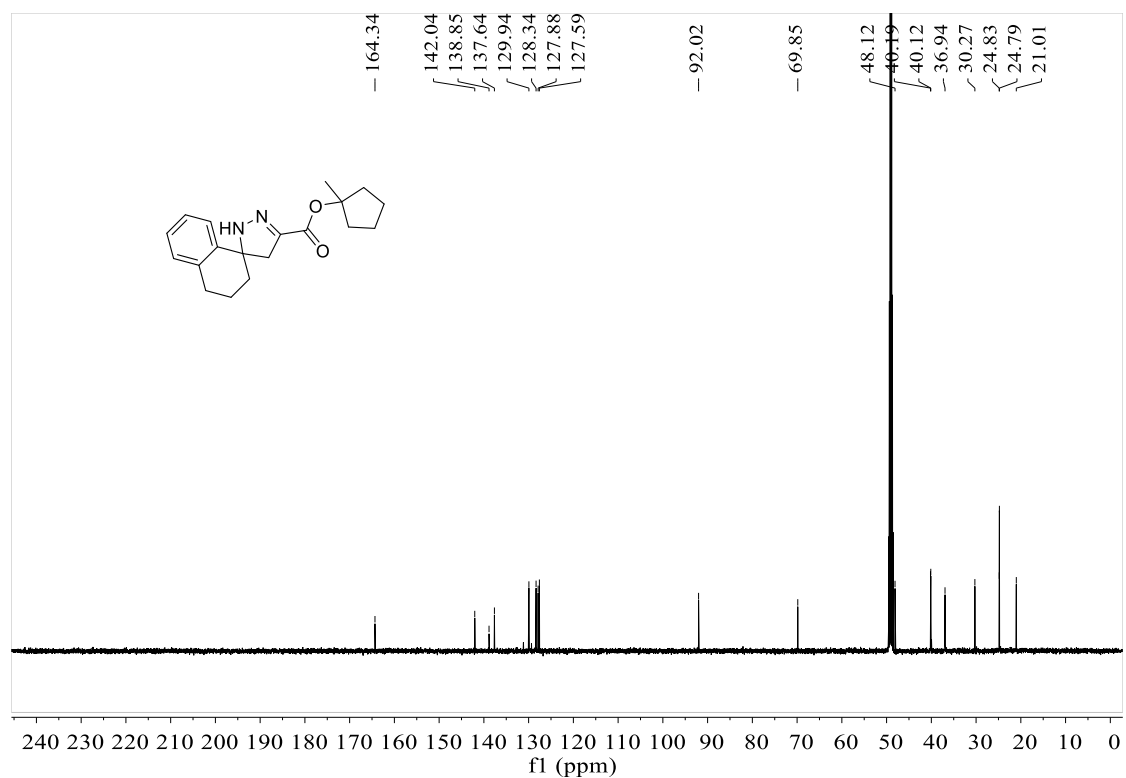

**$^1\text{H}$  NMR (500 MHz,  $\text{CD}_3\text{OD}$ ) and  $^{13}\text{C}$  NMR (126 MHz,  $\text{CD}_3\text{OD}$ ) spectra for **62d**:**

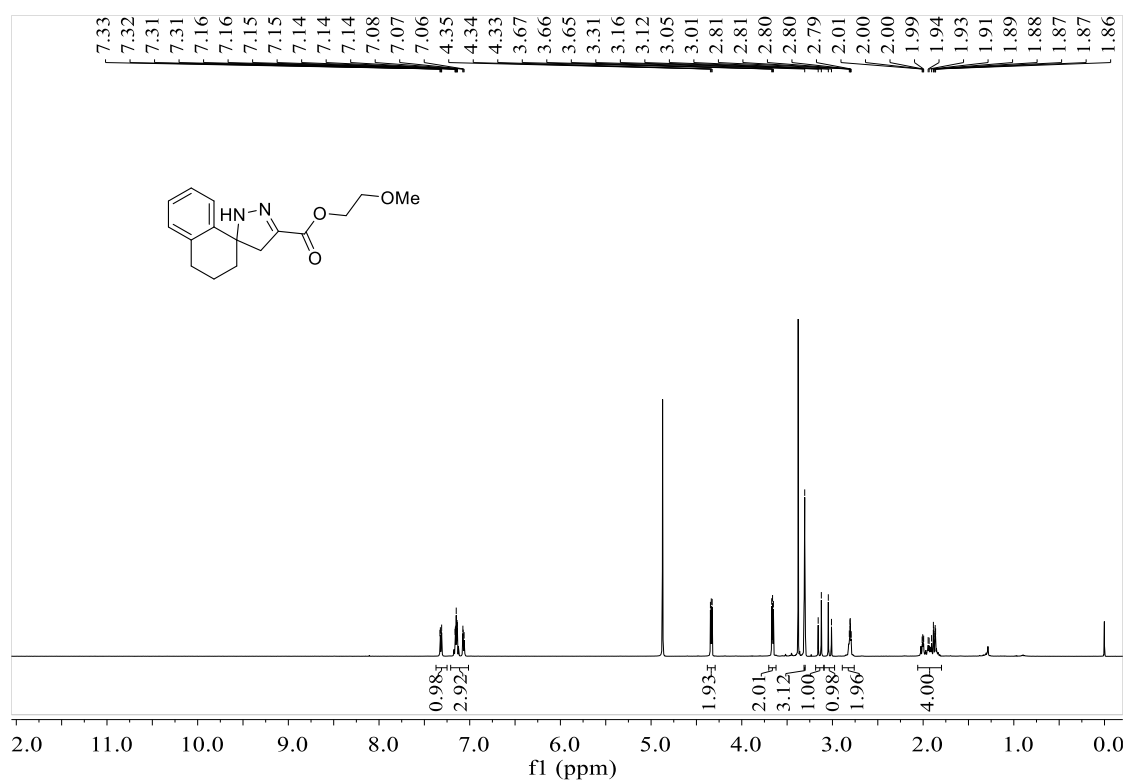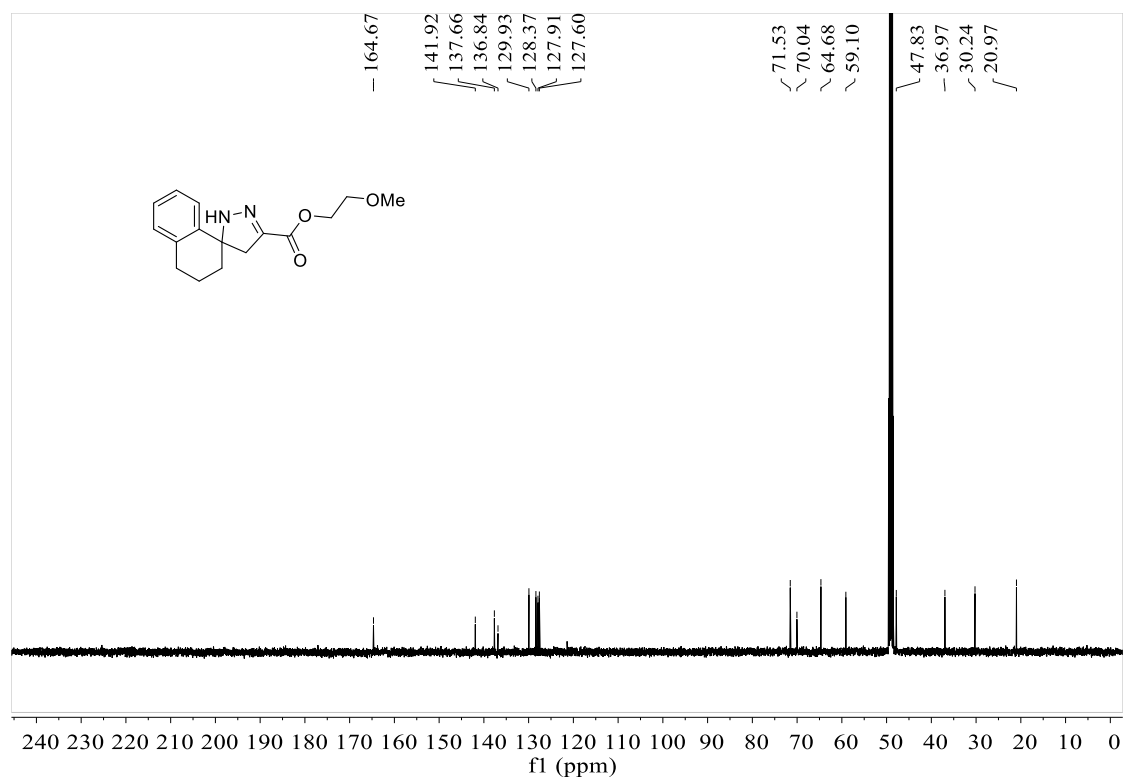

**$^1\text{H}$  NMR (500 MHz,  $\text{CD}_3\text{OD}$ ) and  $^{13}\text{C}$  NMR (126 MHz,  $\text{CD}_3\text{OD}$ ) spectra for **63d**:**

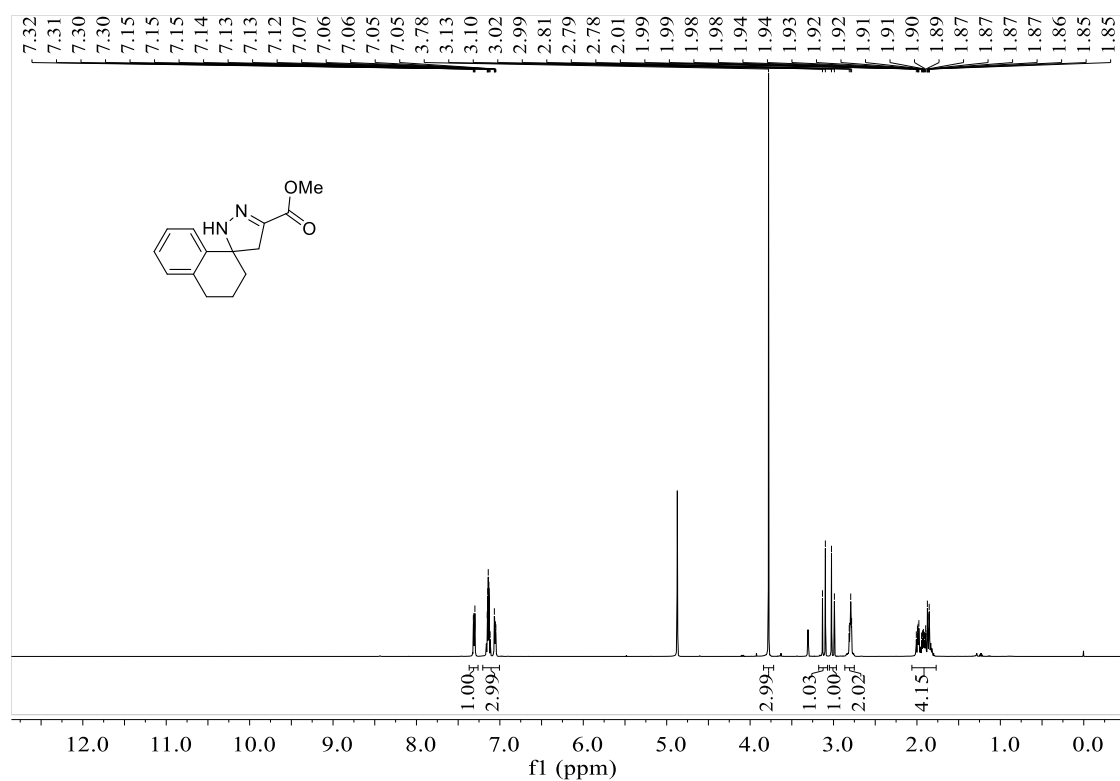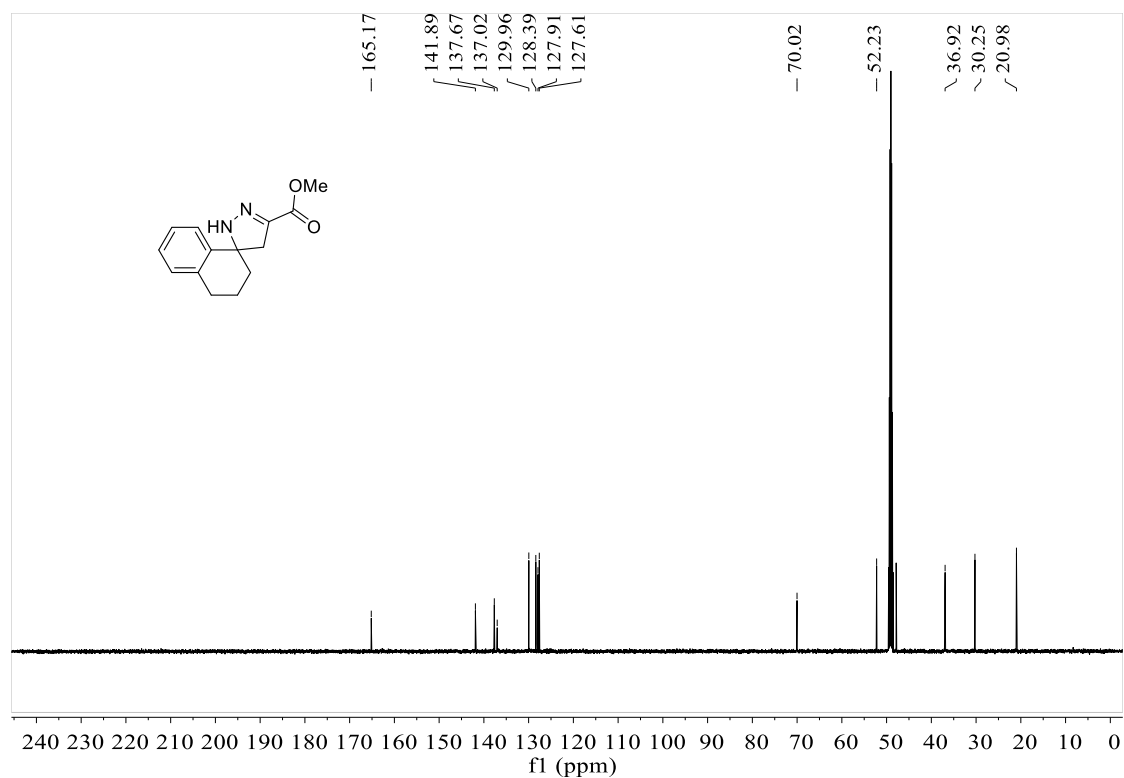

**<sup>1</sup>H NMR (500 MHz, CD<sub>3</sub>OD) and <sup>13</sup>C NMR (126 MHz, CD<sub>3</sub>OD) spectra for 64d:**

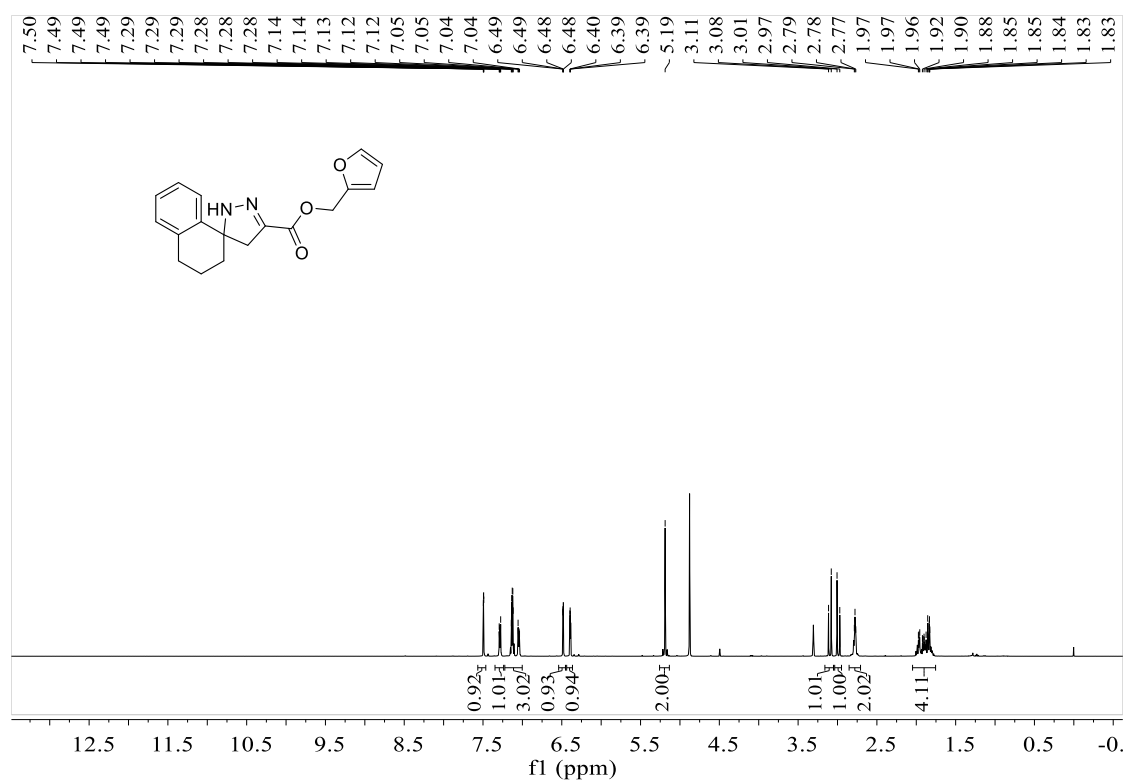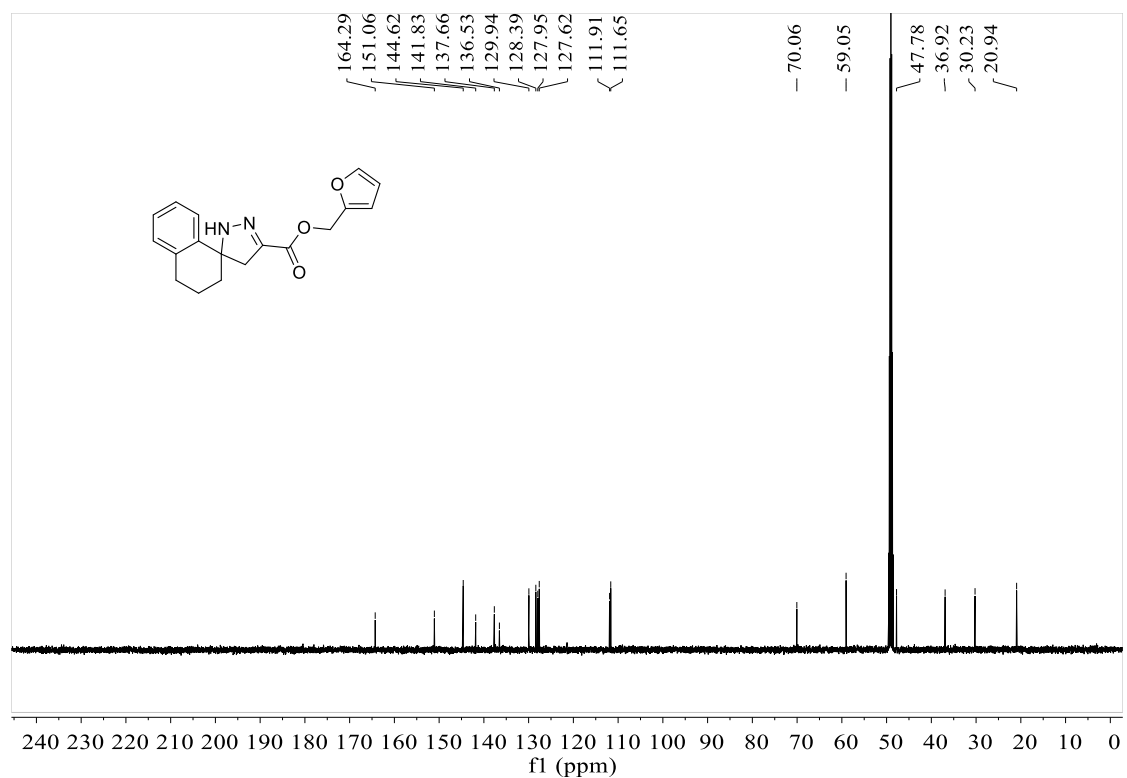

**$^1\text{H}$  NMR (500 MHz,  $\text{CD}_3\text{OD}$ ) and  $^{13}\text{C}$  NMR (126 MHz,  $\text{CD}_3\text{OD}$ ) spectra for **65d**:**

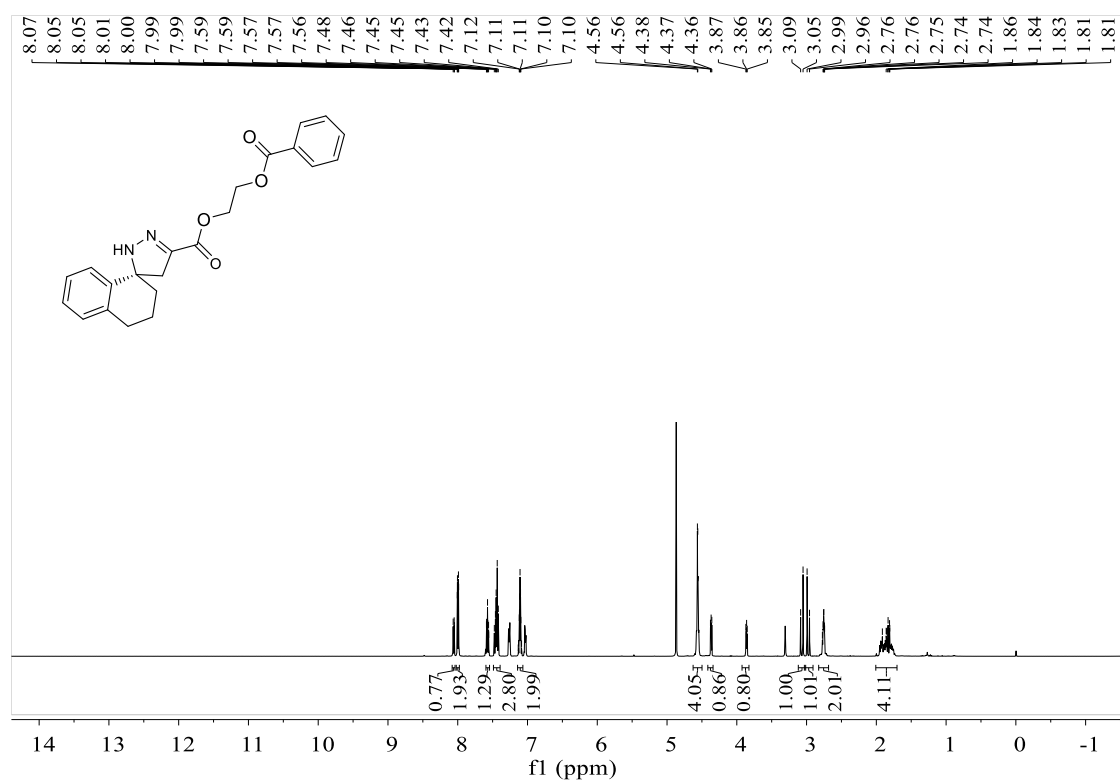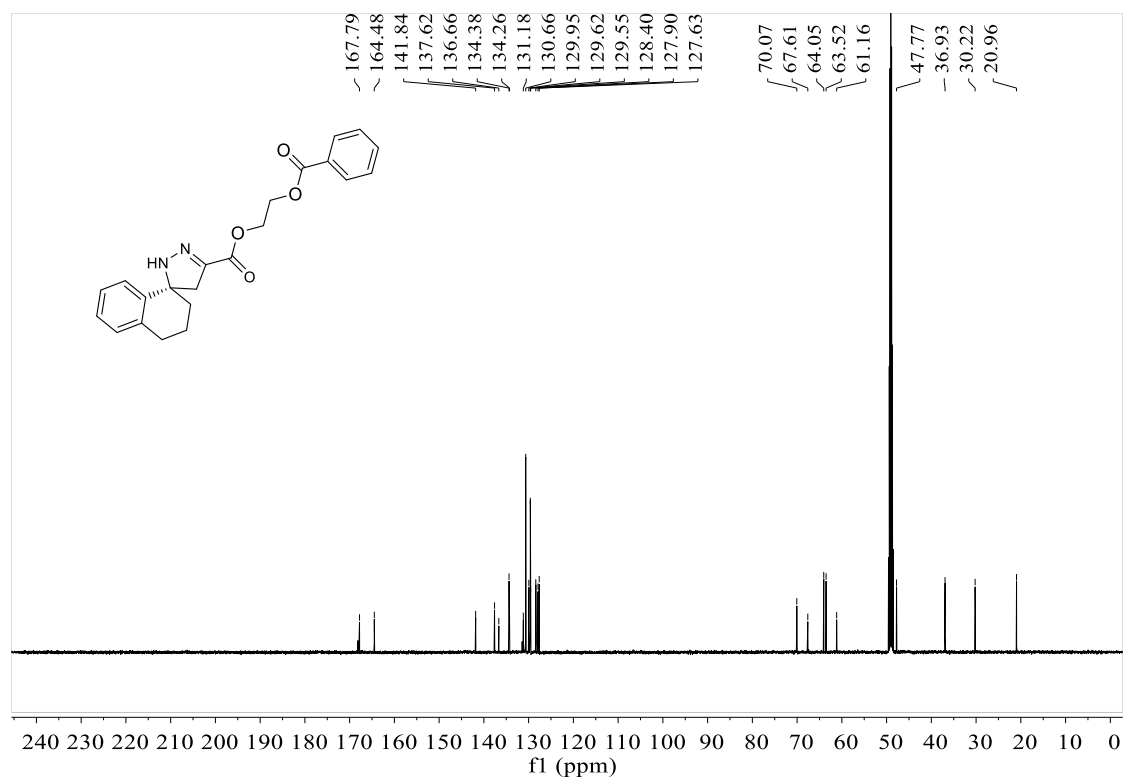

**<sup>1</sup>H NMR (500 MHz, CD<sub>3</sub>OD) and <sup>13</sup>C NMR (126 MHz, CD<sub>3</sub>OD) spectra for **66d**:**

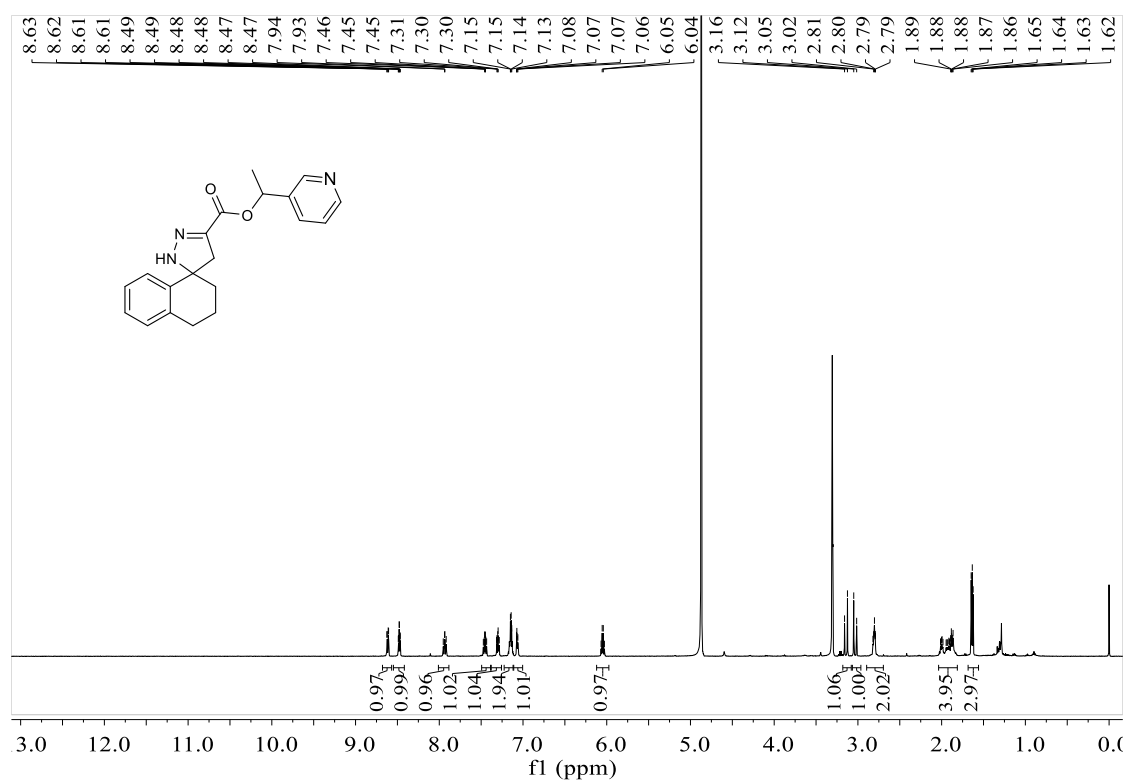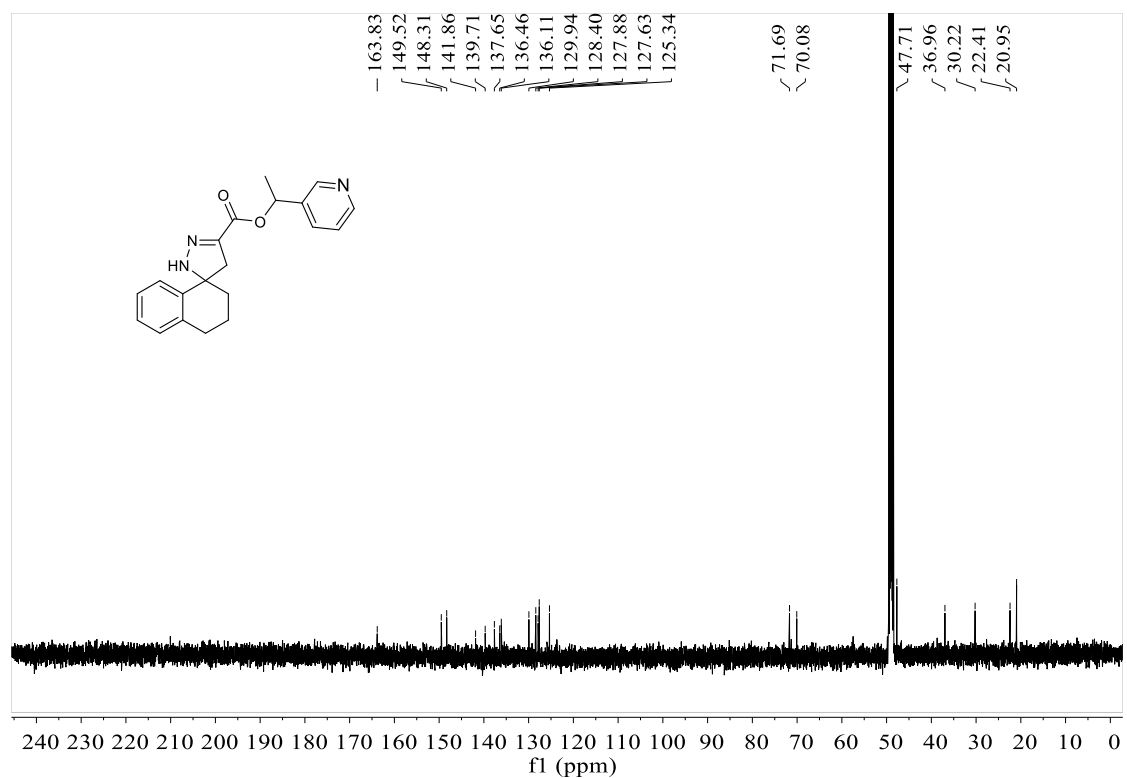

**<sup>1</sup>H NMR (500 MHz, CD<sub>3</sub>OD) and <sup>13</sup>C NMR (126 MHz, CD<sub>3</sub>OD) spectra for 67d:**

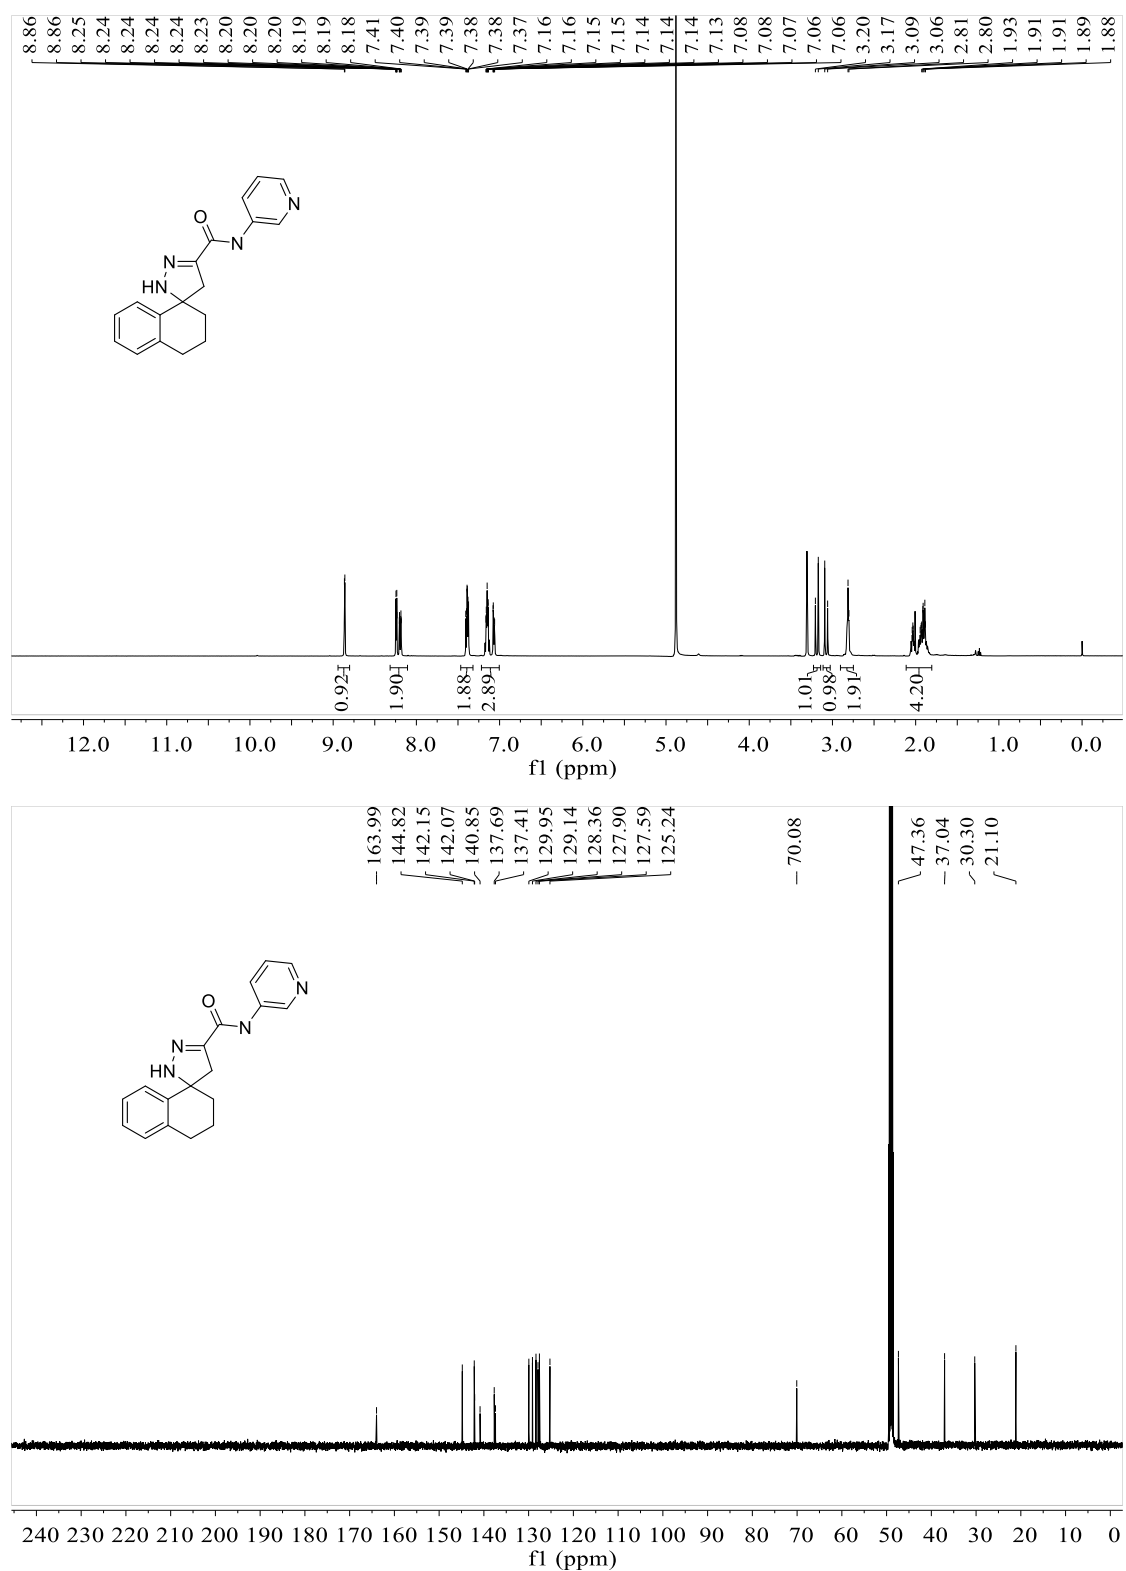



**<sup>1</sup>H NMR (500 MHz, CD<sub>3</sub>OD) and <sup>13</sup>C NMR (126 MHz, CD<sub>3</sub>OD) spectra for **68d**:**

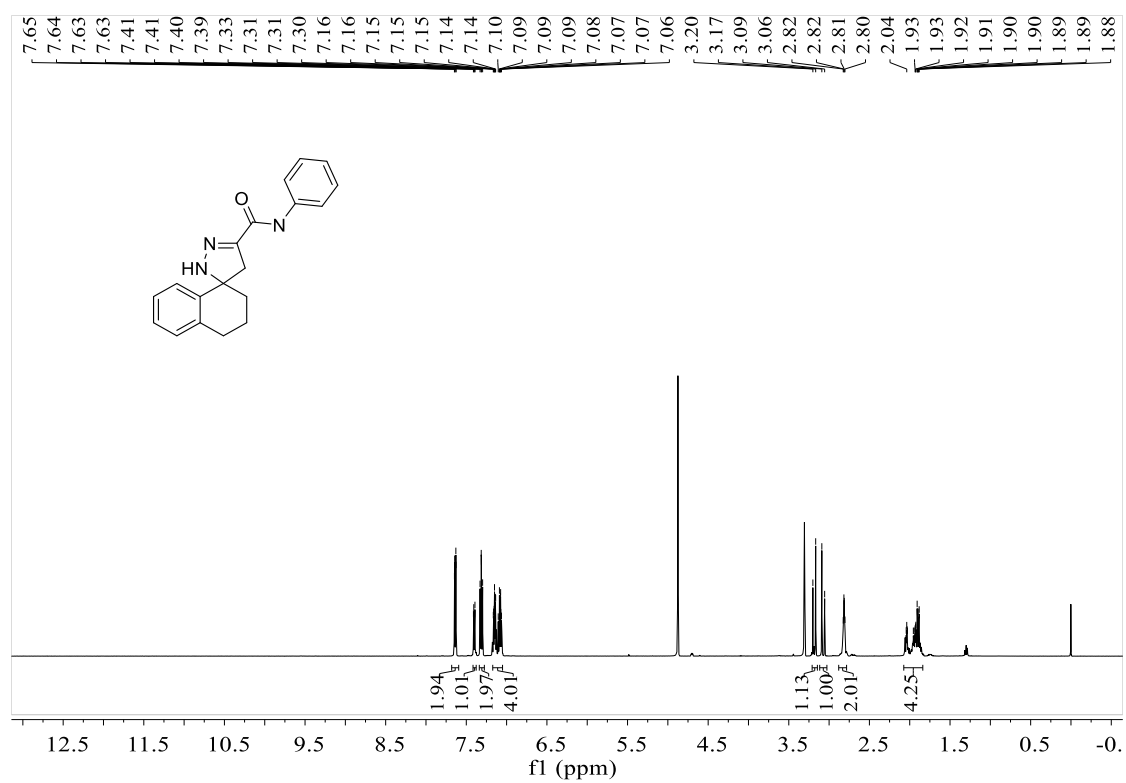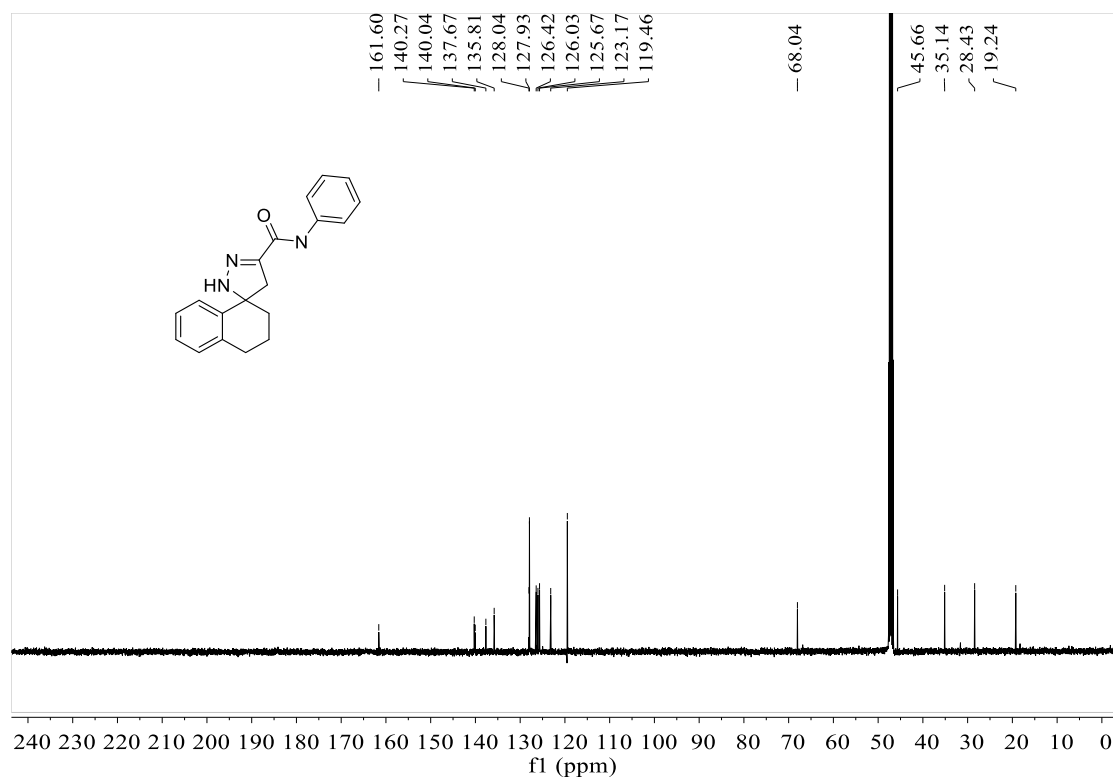

**<sup>1</sup>H NMR (500 MHz, CD<sub>3</sub>OD) and <sup>13</sup>C NMR (126 MHz, CD<sub>3</sub>OD) spectra for **69d**:**

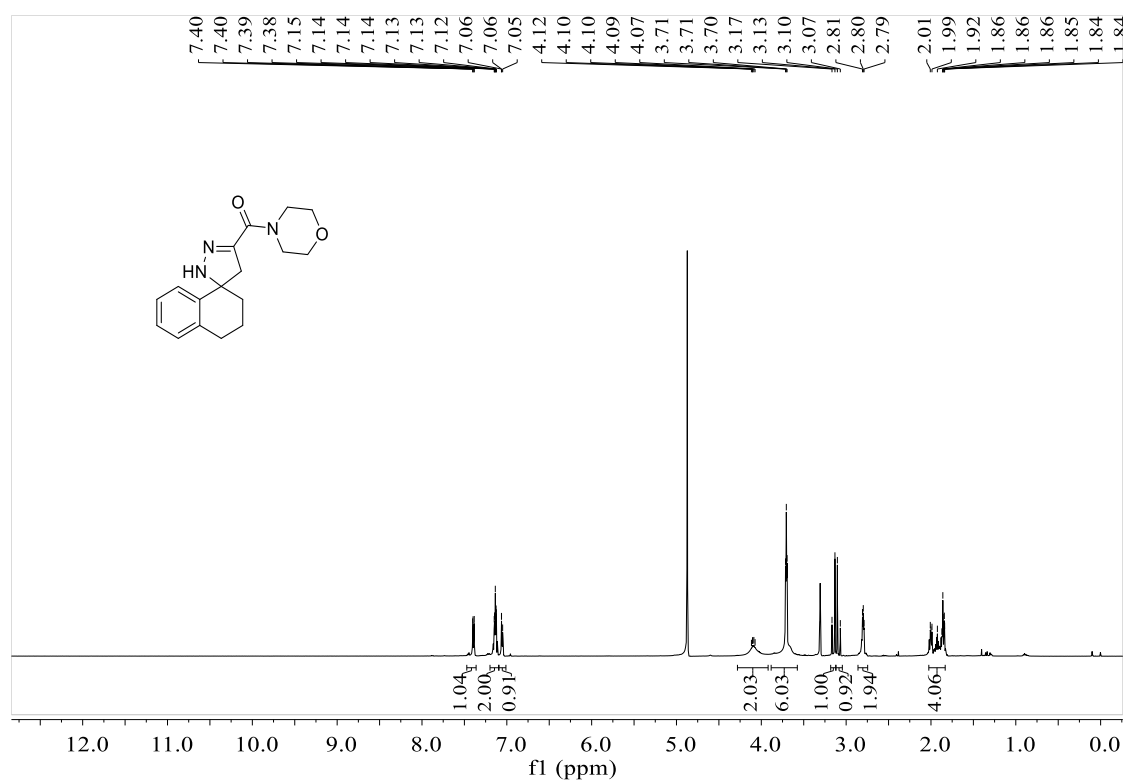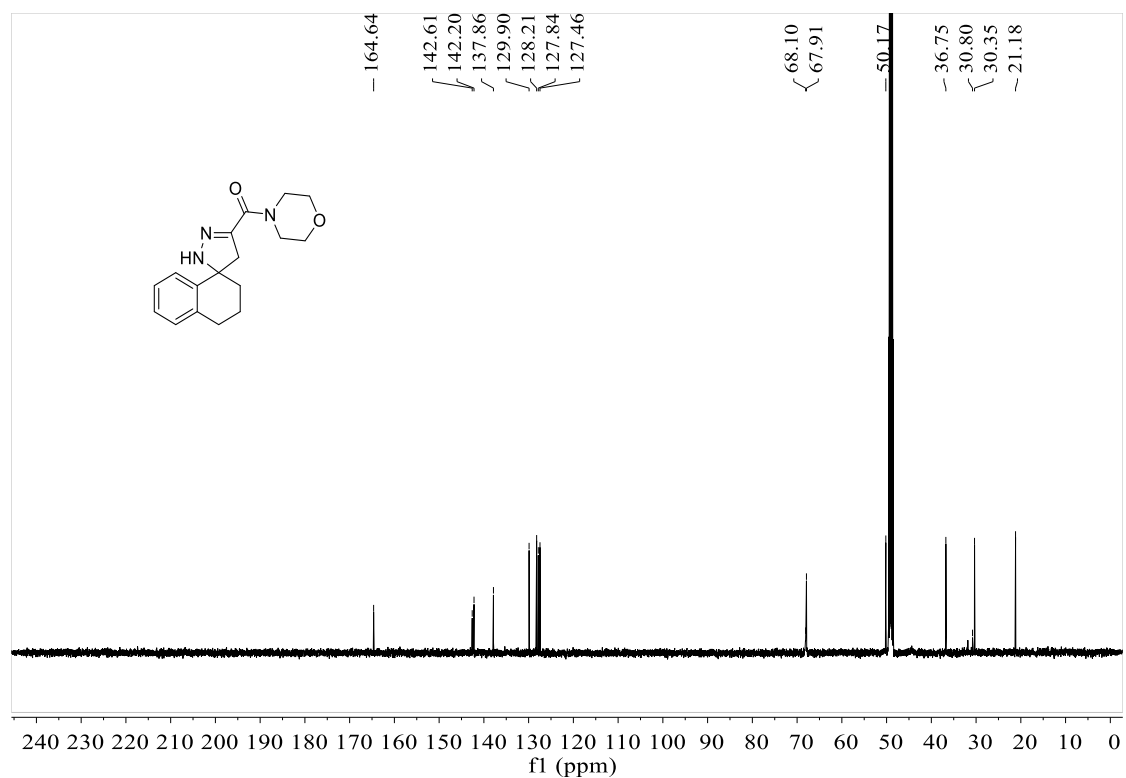

**$^1\text{H}$  NMR (500 MHz,  $\text{CD}_3\text{OD}$ ) and  $^{13}\text{C}$  NMR (126 MHz,  $\text{CD}_3\text{OD}$ ) spectra for **70d**:**

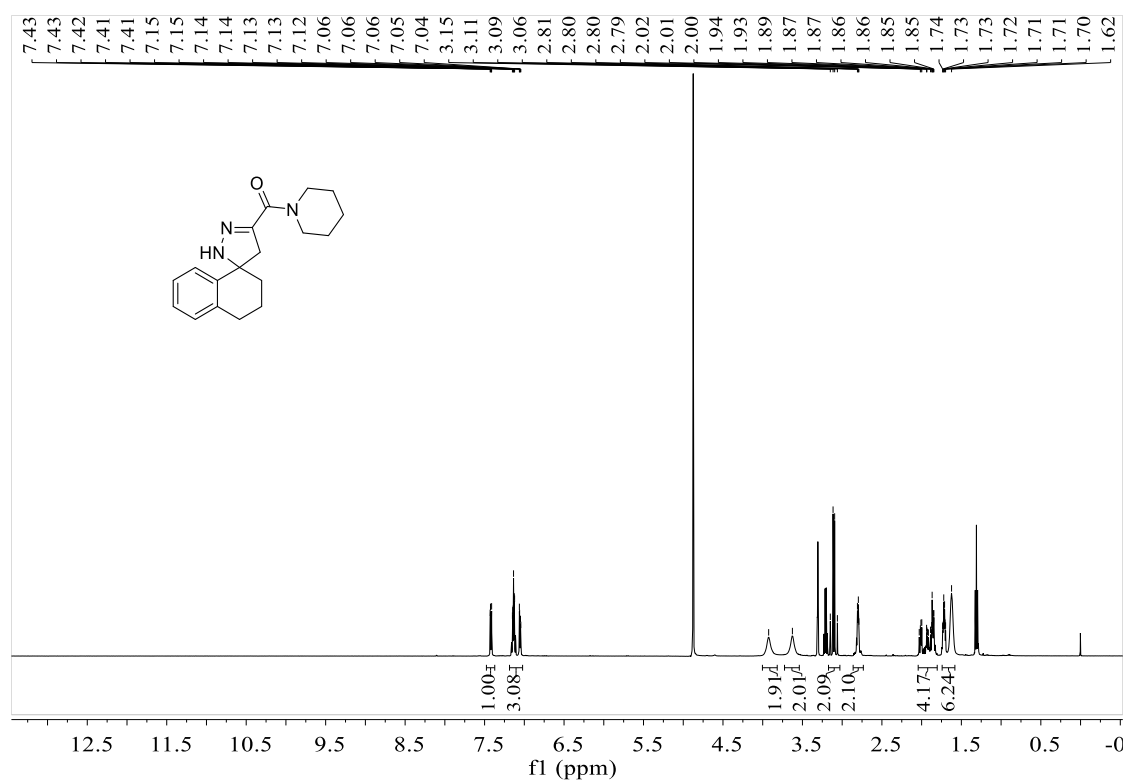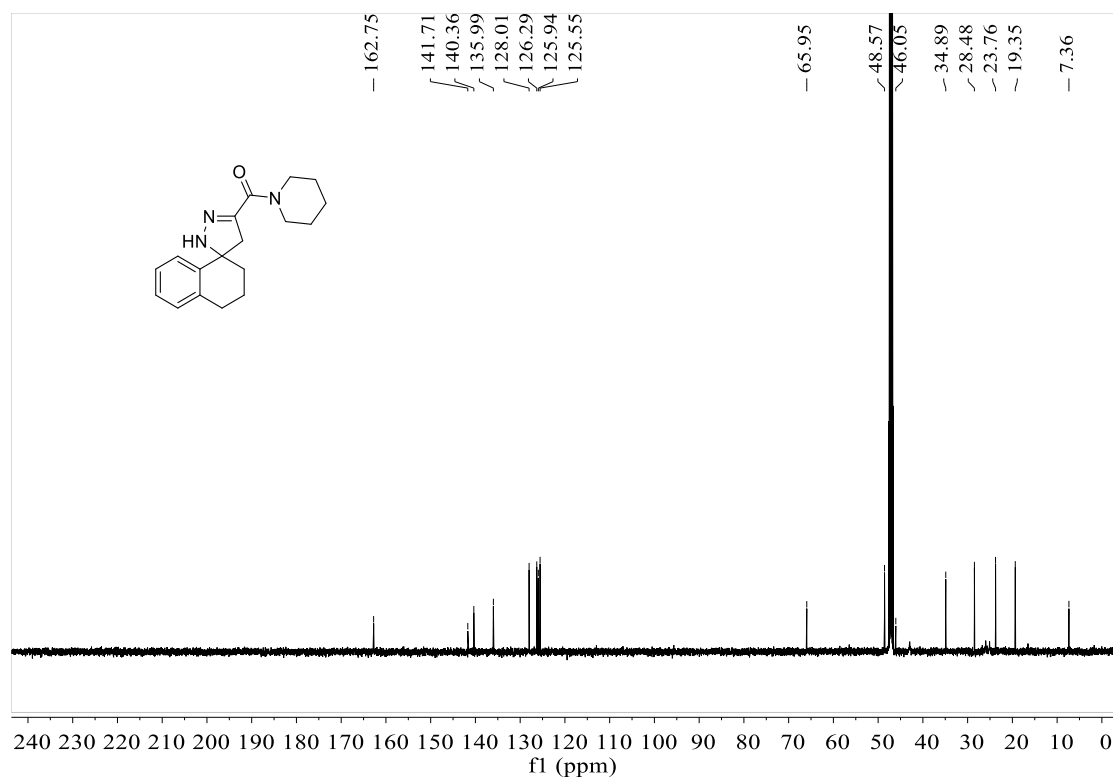

**<sup>1</sup>H NMR (500 MHz, CD<sub>3</sub>OD) and <sup>13</sup>C NMR (126 MHz, CD<sub>3</sub>OD) spectra for 71d:**

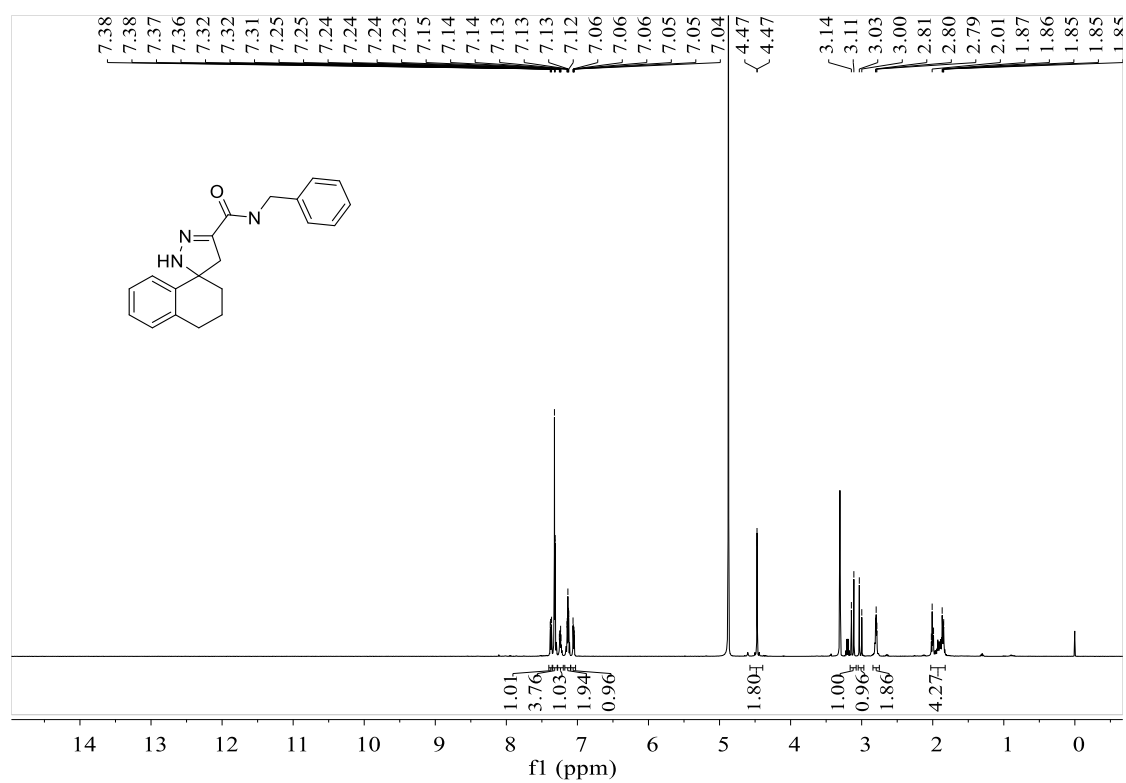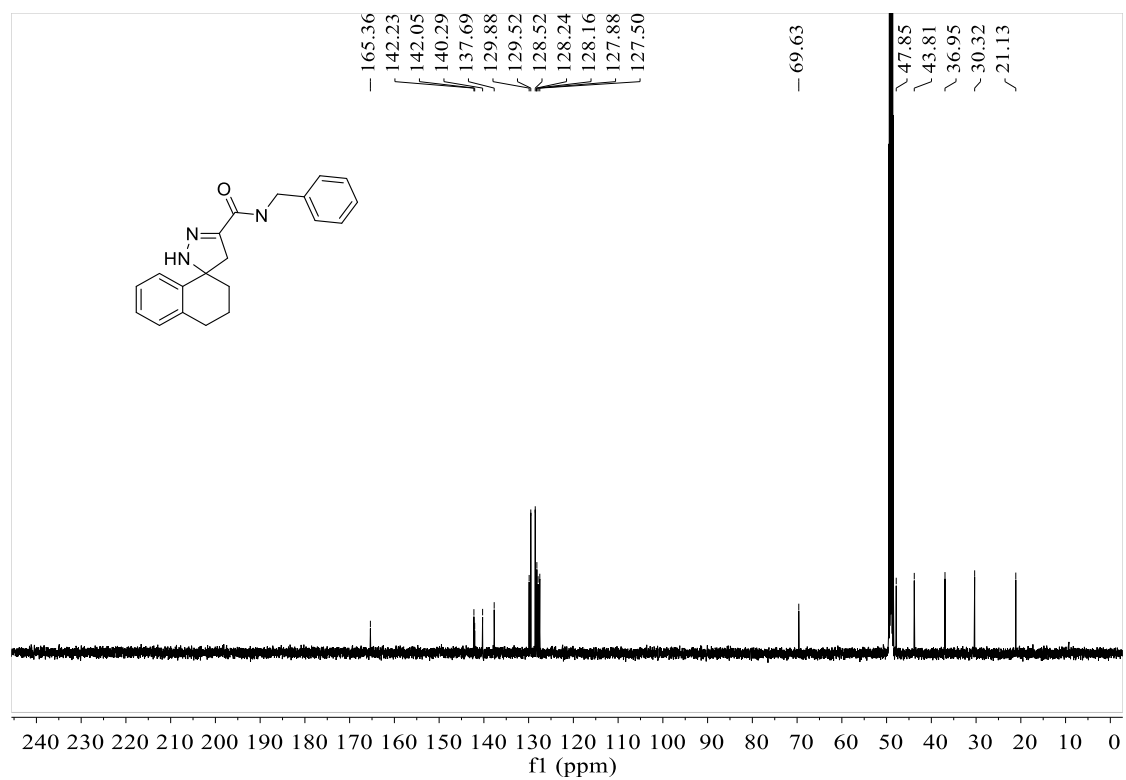

<sup>1</sup>H NMR (500 MHz, CD<sub>3</sub>OD) and <sup>13</sup>C NMR (126 MHz, CD<sub>3</sub>OD) spectra for **72d**:

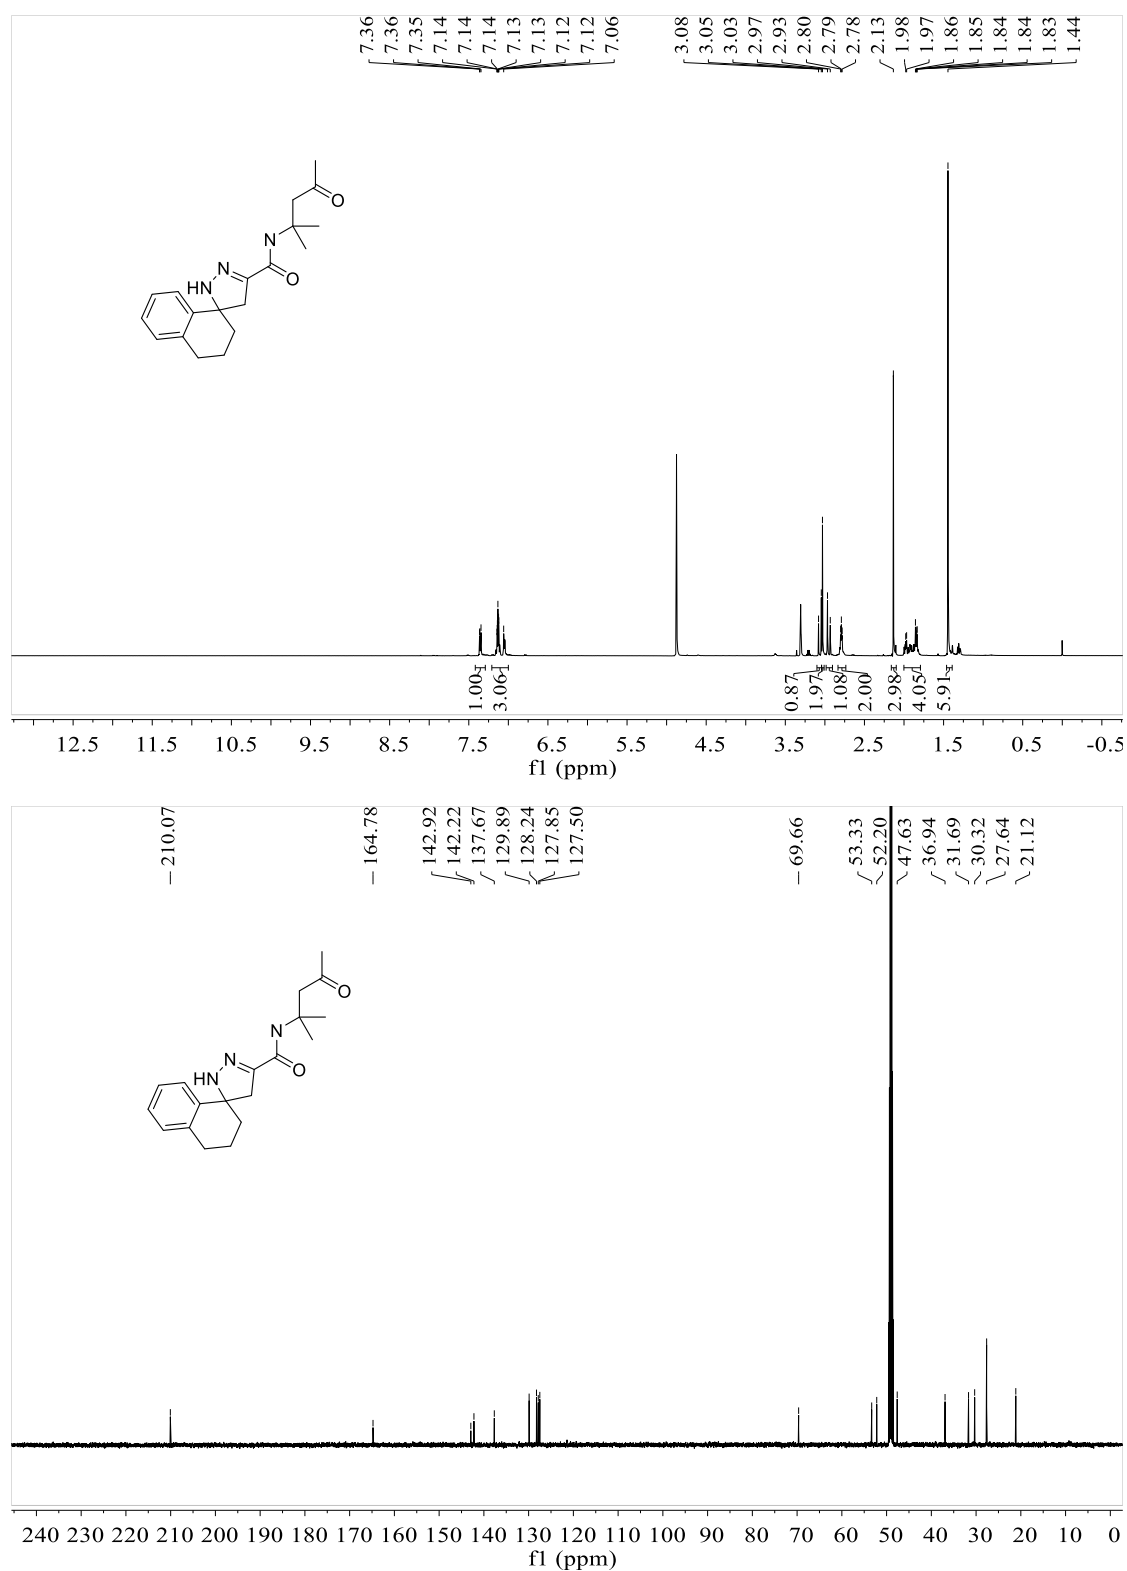

**$^1\text{H}$  NMR (500 MHz,  $\text{CD}_3\text{OD}$ ) and  $^{13}\text{C}$  NMR (126 MHz,  $\text{CD}_3\text{OD}$ ) spectra for **73d**:**

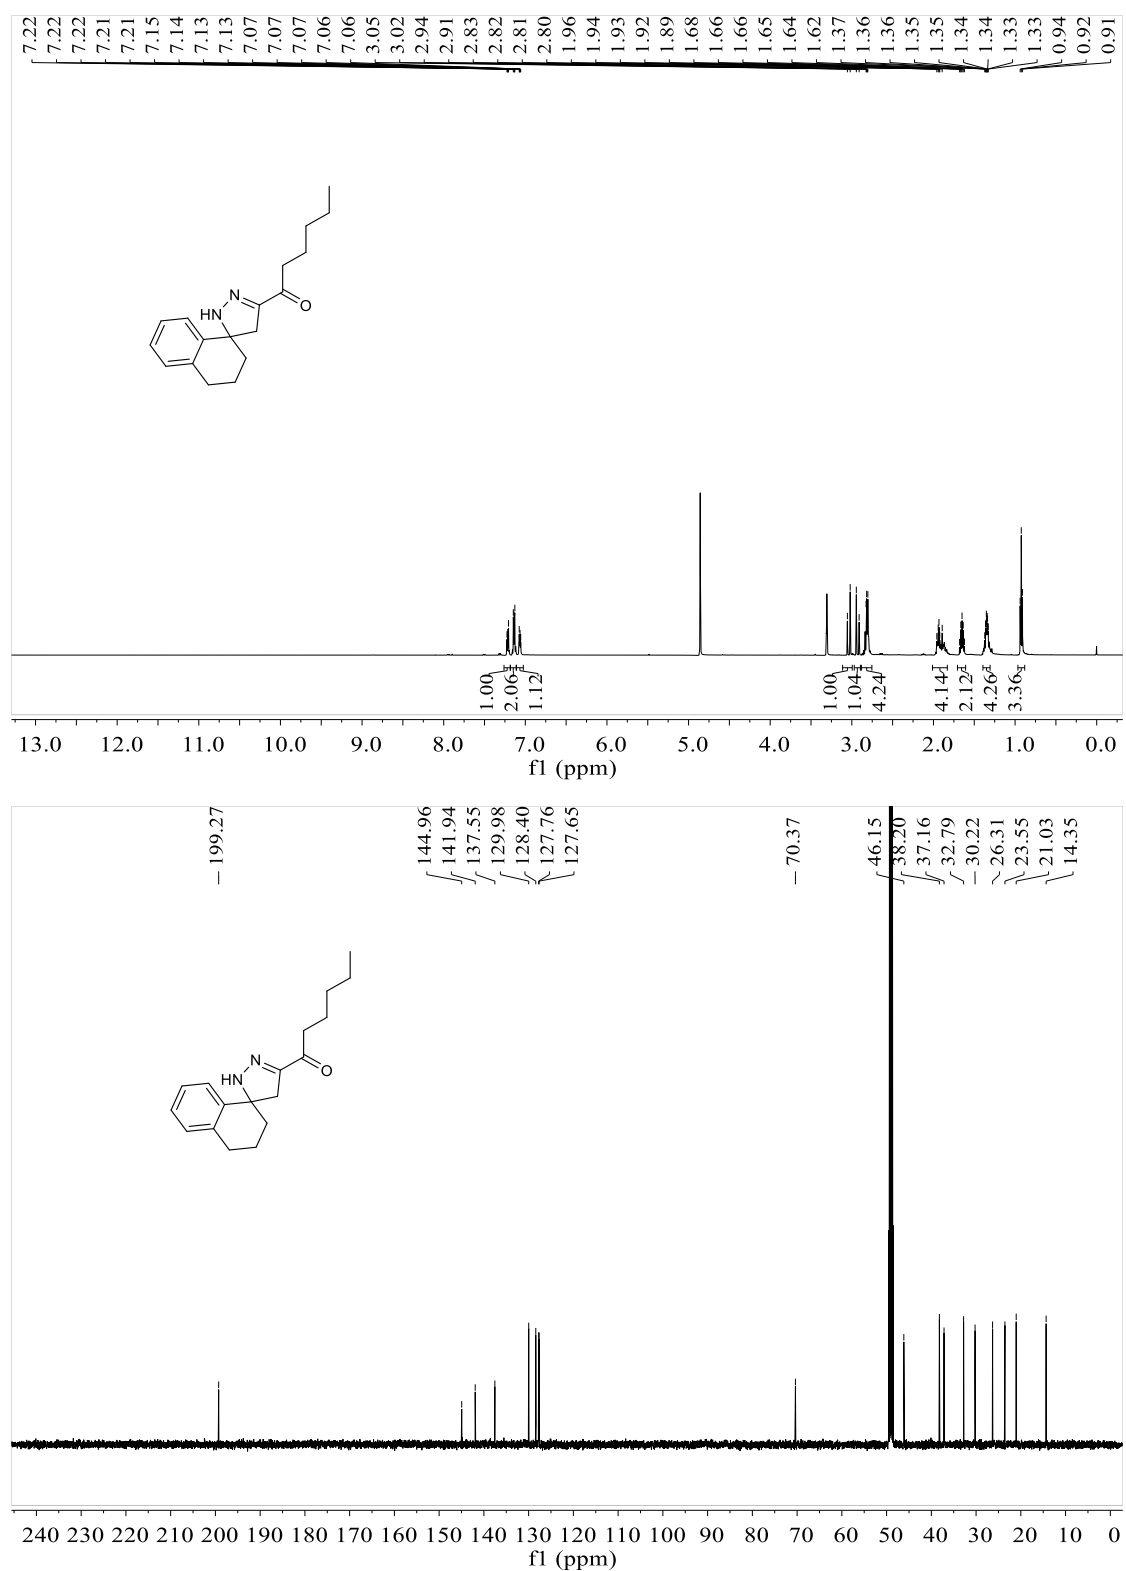

**$^1\text{H}$  NMR (500 MHz,  $\text{CD}_3\text{OD}$ ) and  $^{13}\text{C}$  NMR (126 MHz,  $\text{CD}_3\text{OD}$ ) spectra for **74d**:**

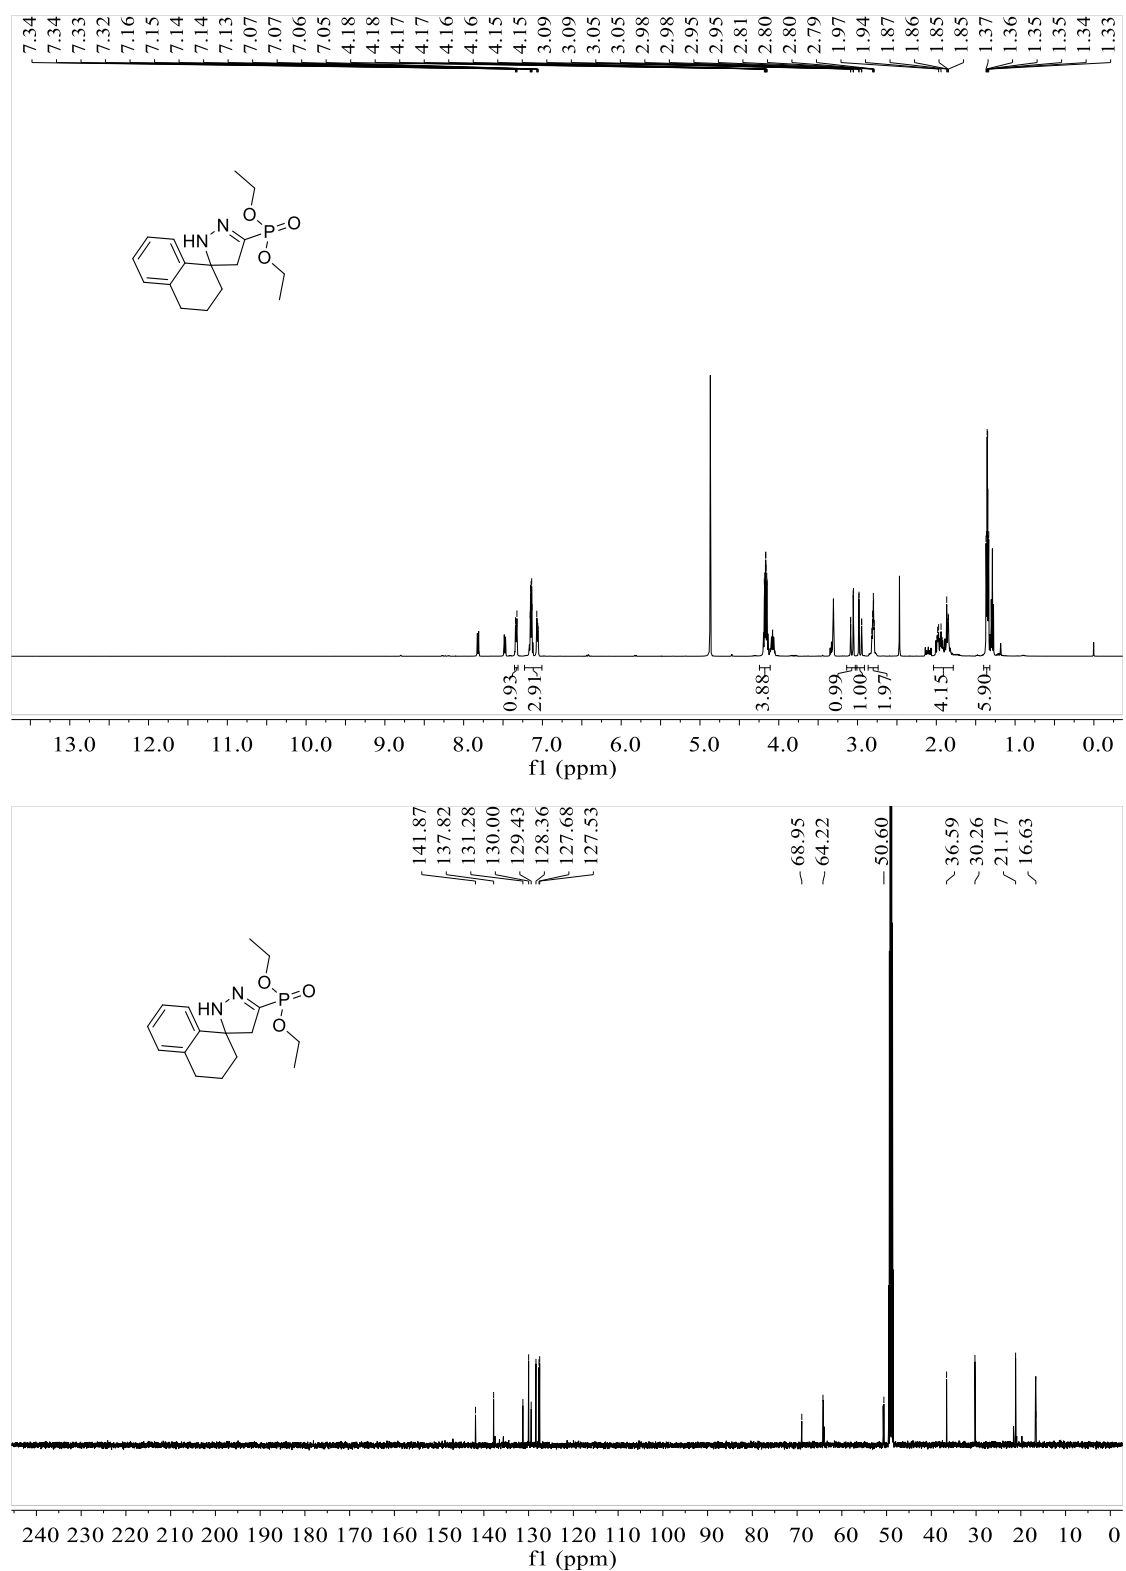

**<sup>1</sup>H NMR (500 MHz, CDCl<sub>3</sub>) and <sup>13</sup>C NMR (126 MHz, CDCl<sub>3</sub>) spectra for **77d**:**

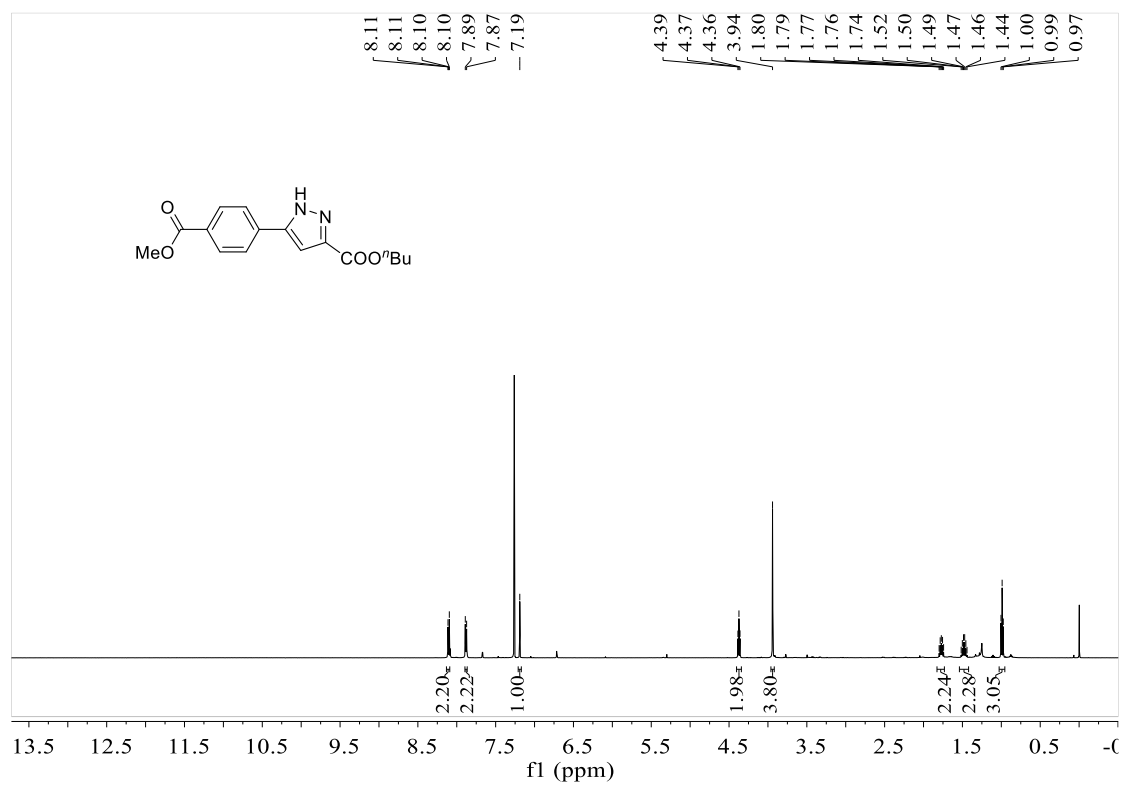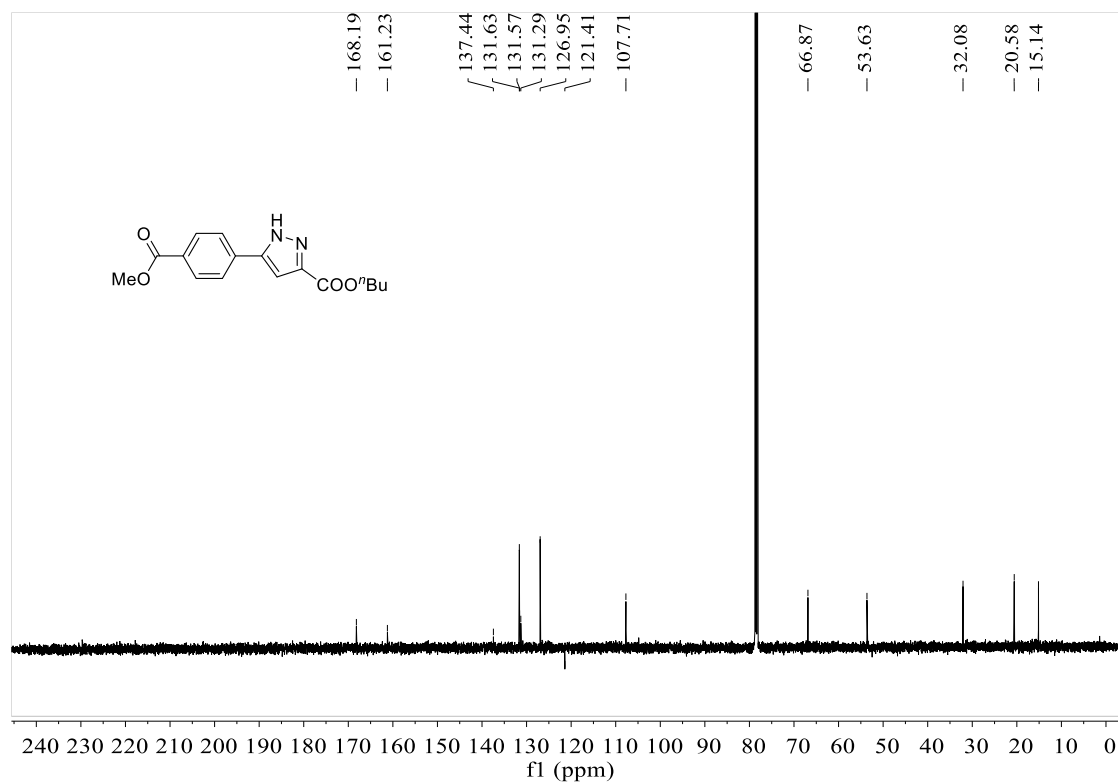



<sup>1</sup>H NMR (500 MHz, CDCl<sub>3</sub>) and <sup>13</sup>C NMR (126 MHz, CDCl<sub>3</sub>) spectra for **78d**:

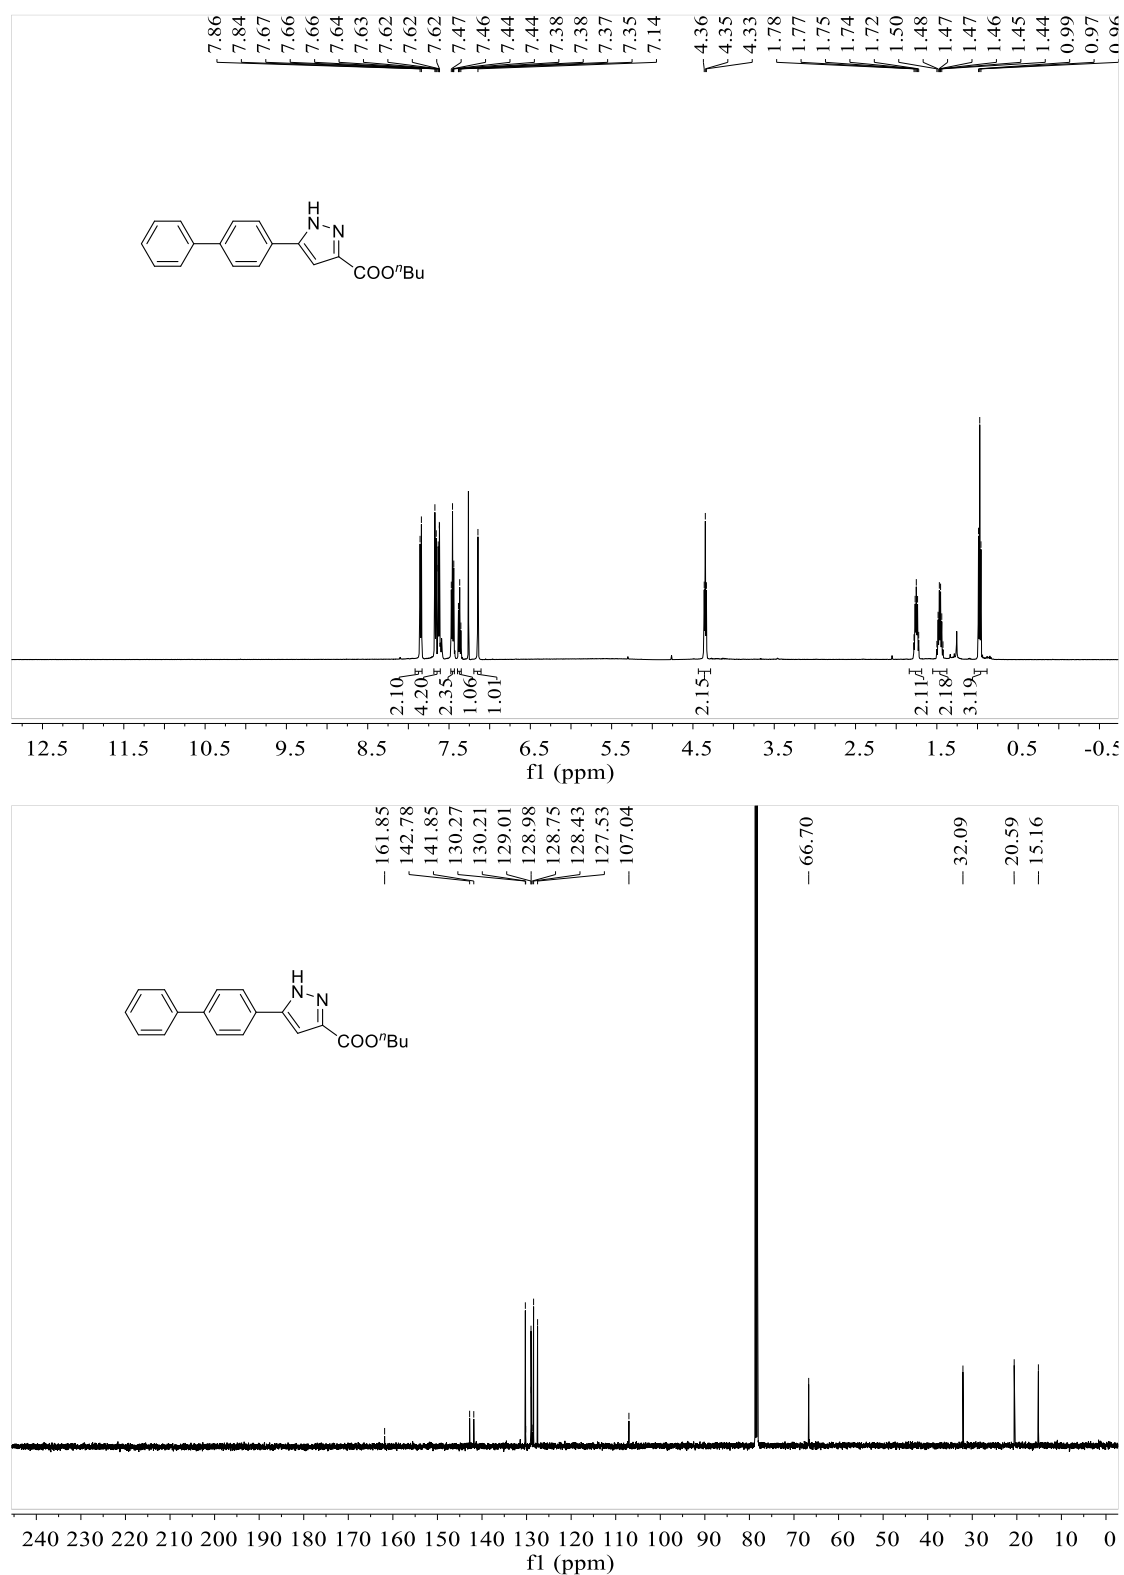

<sup>1</sup>H NMR (500 MHz, CDCl<sub>3</sub>) and <sup>13</sup>C NMR (126 MHz, CDCl<sub>3</sub>) spectra for **79d**:

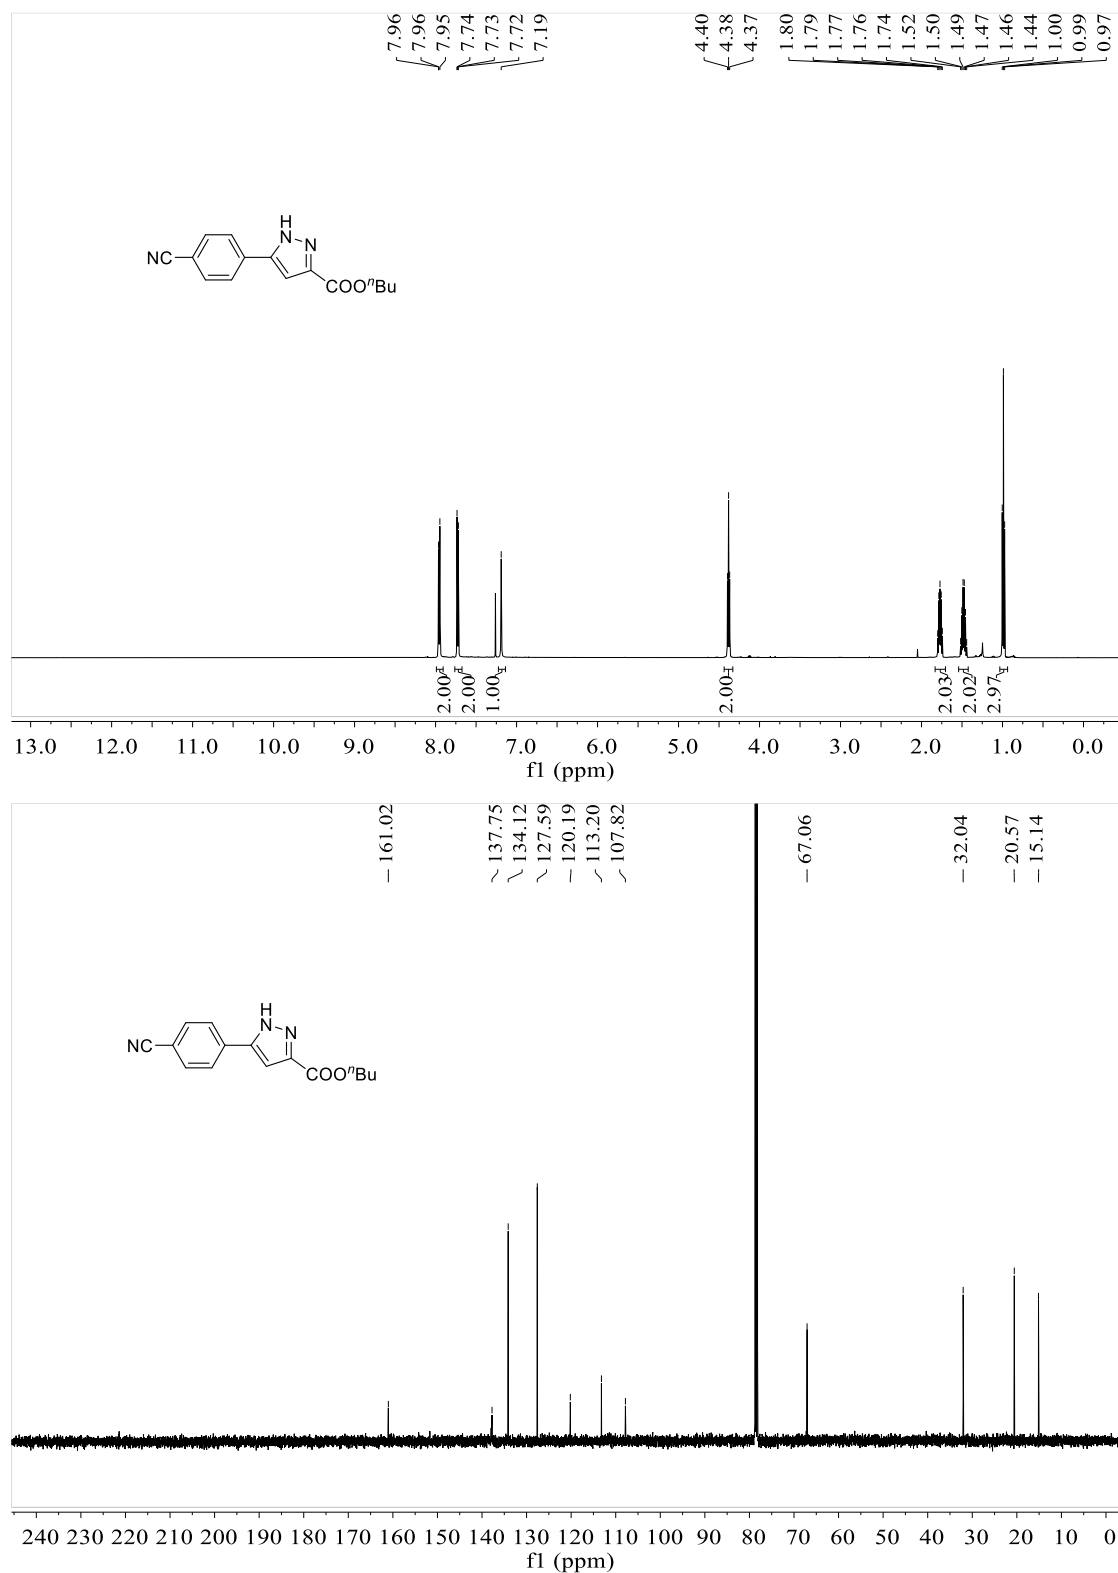

<sup>1</sup>H NMR (500 MHz, CDCl<sub>3</sub>) and <sup>13</sup>C NMR (126 MHz, CDCl<sub>3</sub>) spectra for **80d**:

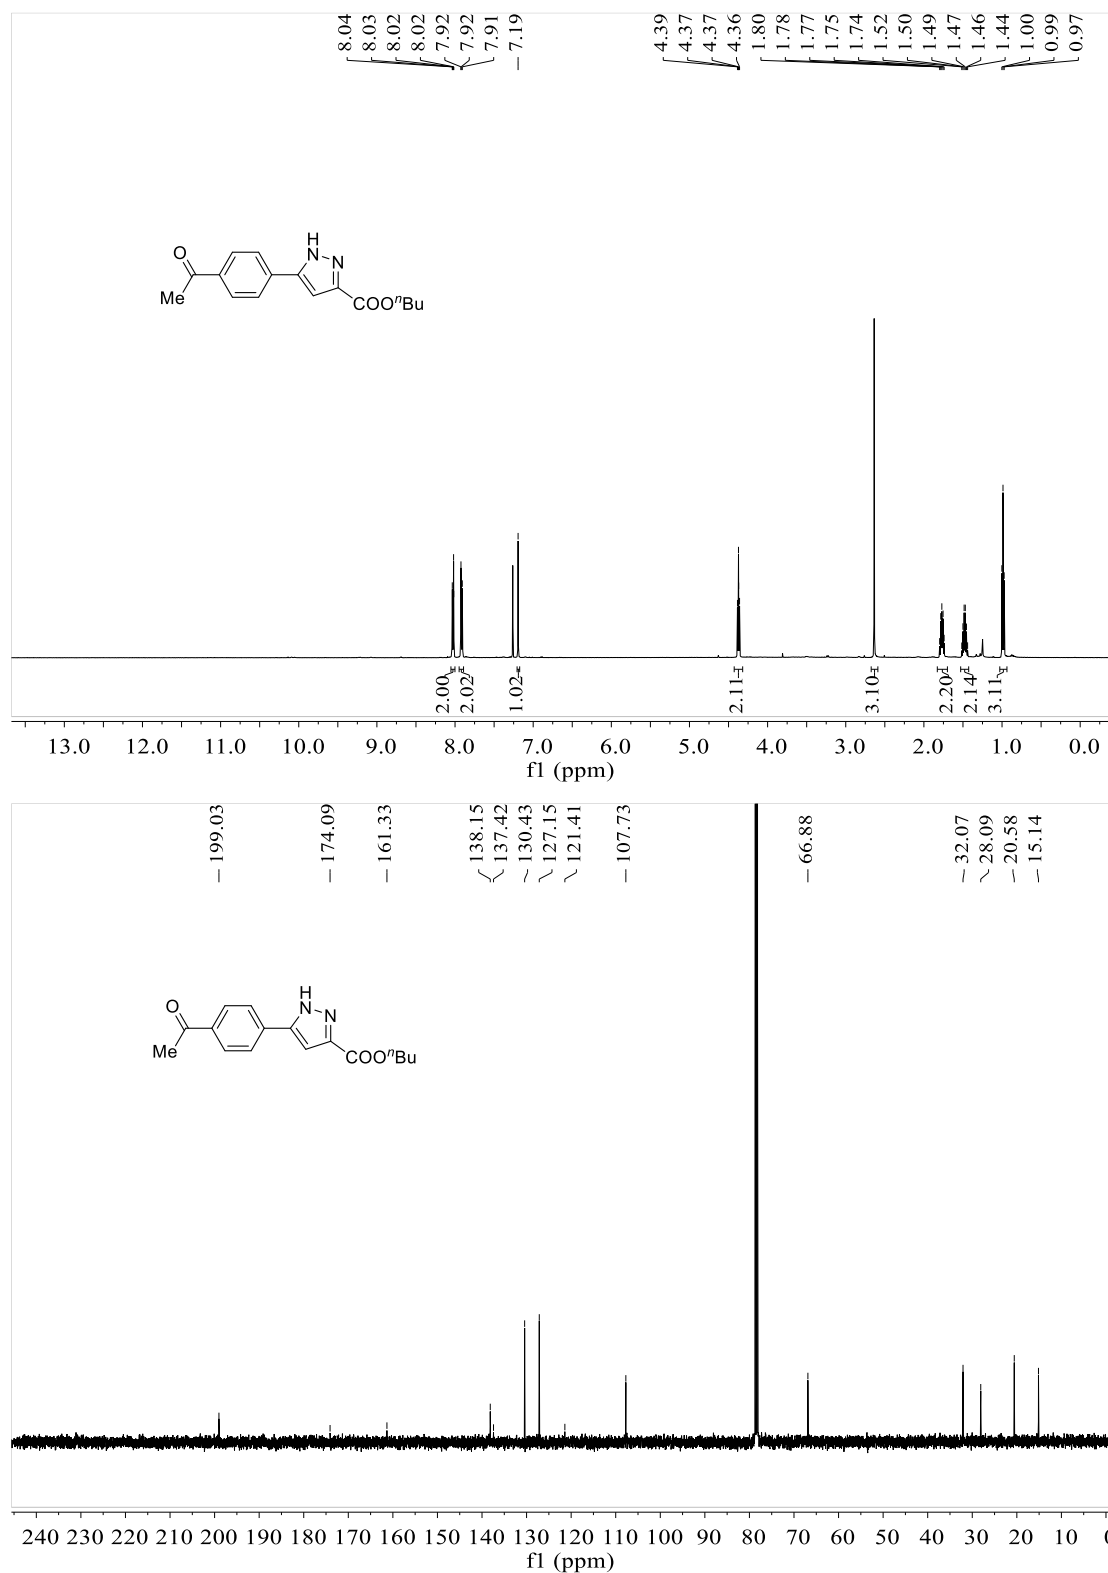

<sup>1</sup>H NMR (500 MHz, CDCl<sub>3</sub>) and <sup>13</sup>C NMR (126 MHz, CDCl<sub>3</sub>) spectra for **81d**:

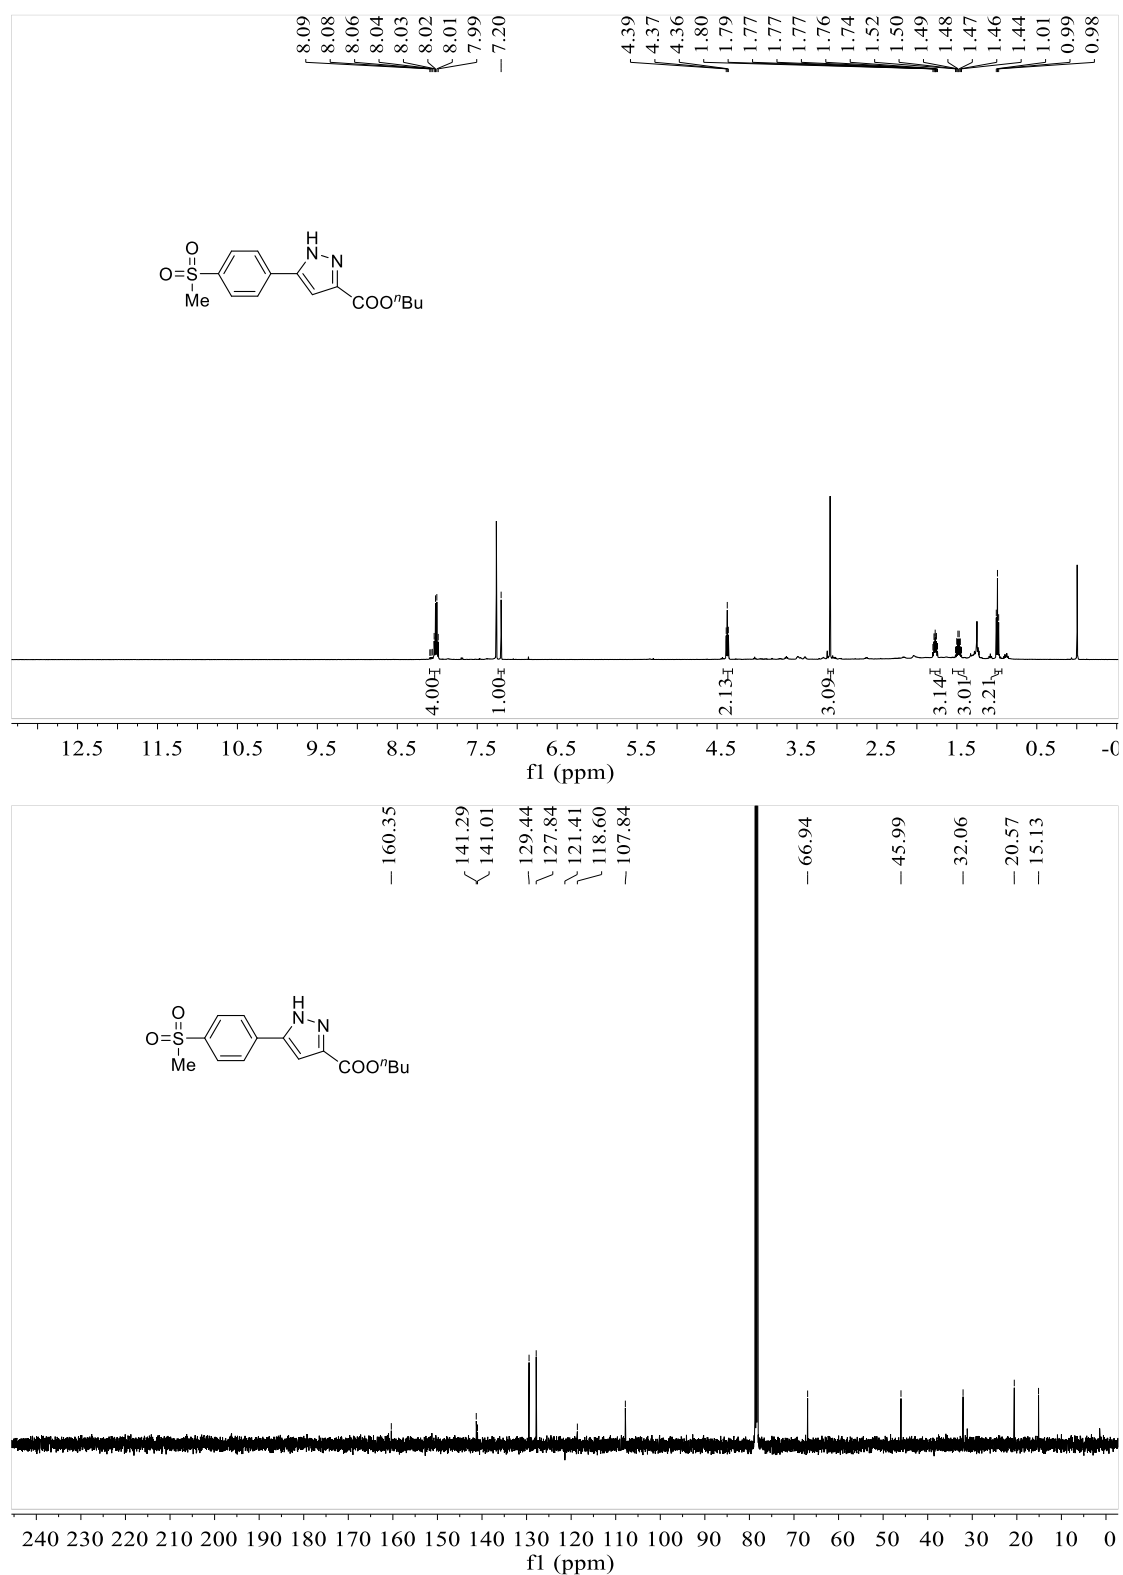

<sup>1</sup>H NMR (500 MHz, CDCl<sub>3</sub>) and <sup>13</sup>C NMR (126 MHz, CDCl<sub>3</sub>) spectra for **82d**:

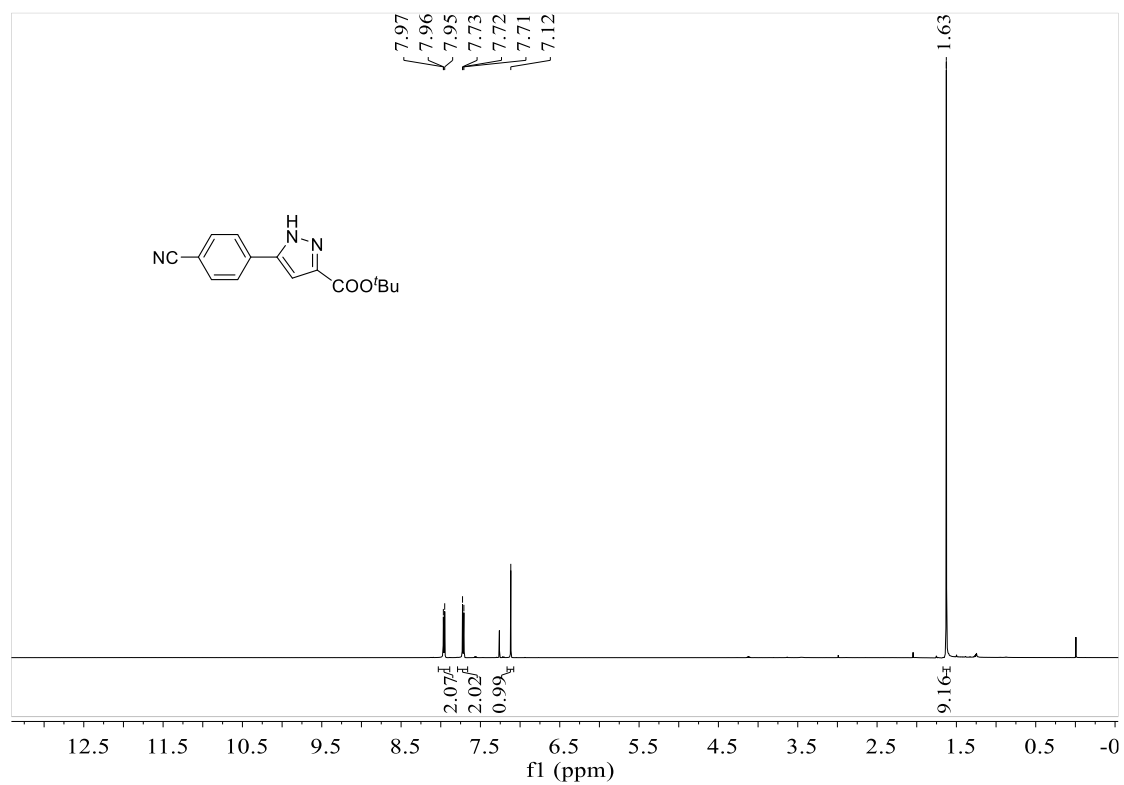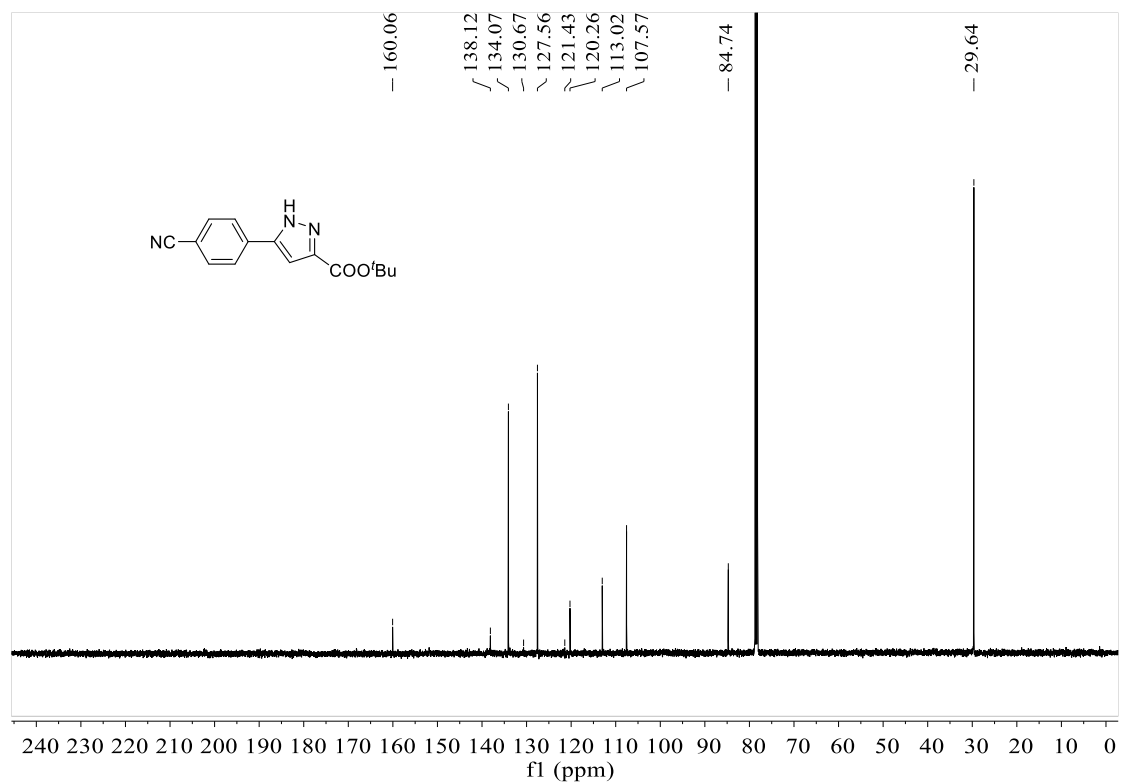

<sup>1</sup>H NMR (500 MHz, CDCl<sub>3</sub>) and <sup>13</sup>C NMR (126 MHz, CDCl<sub>3</sub>) spectra for **83d**:

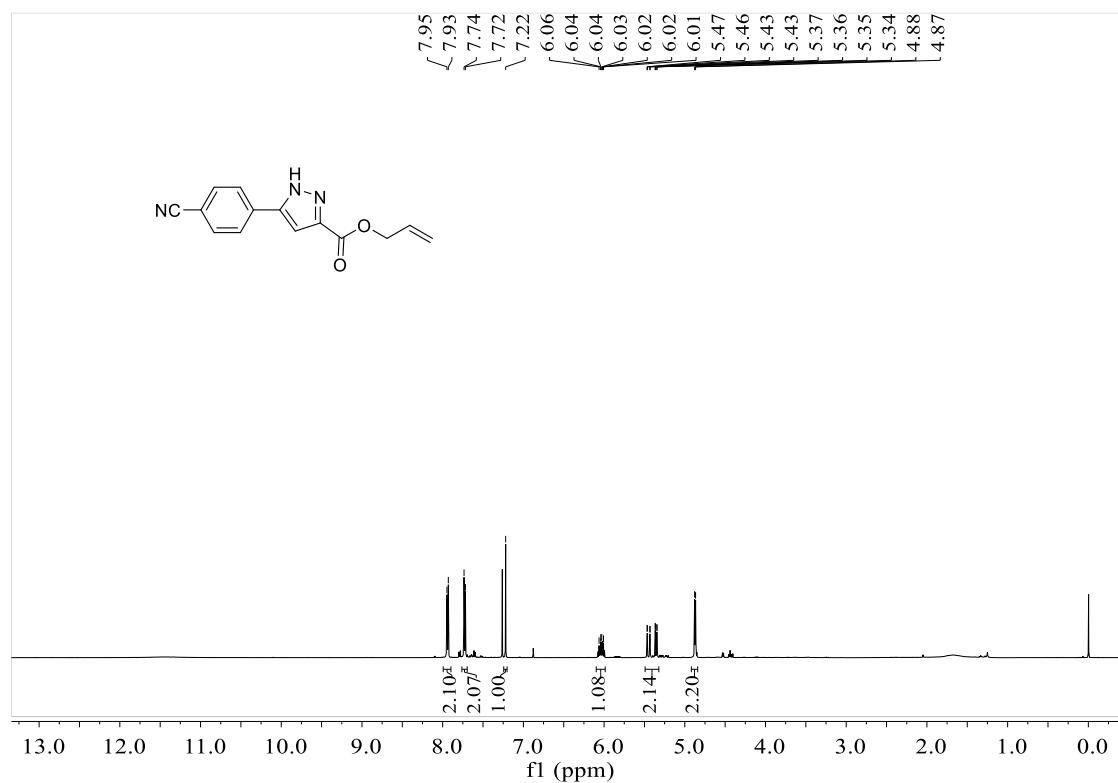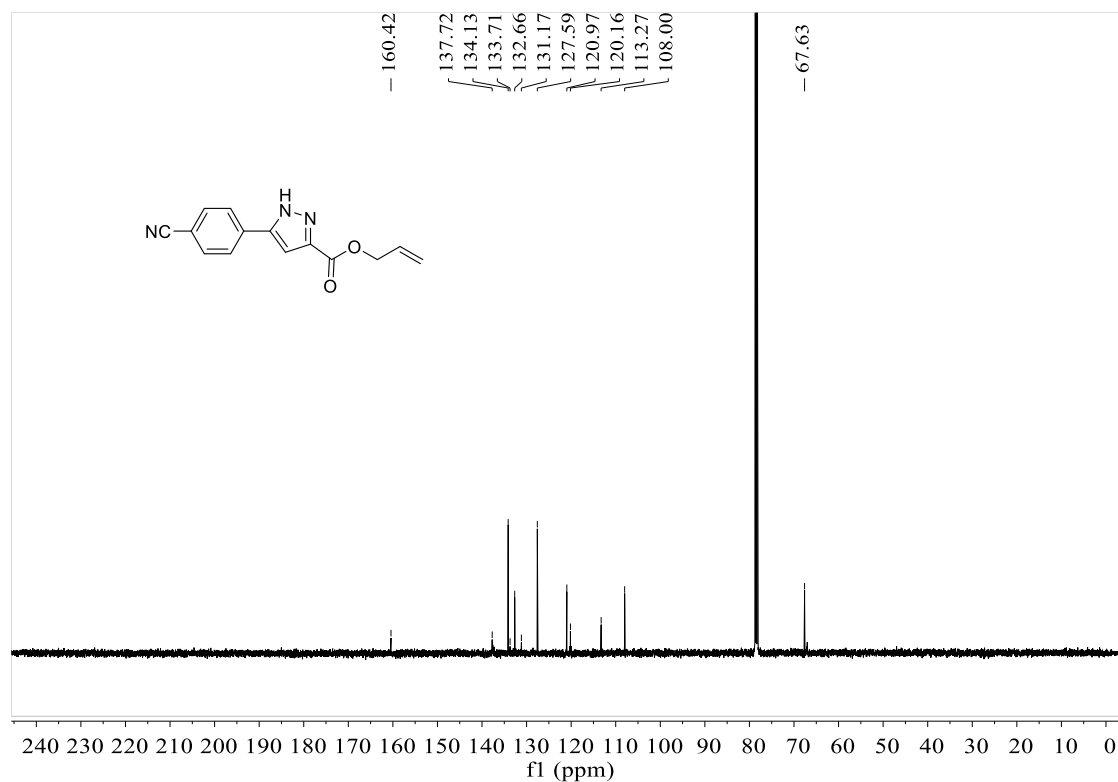

<sup>1</sup>H NMR (500 MHz, CDCl<sub>3</sub>) and <sup>13</sup>C NMR (126 MHz, CDCl<sub>3</sub>) spectra for **84d**:

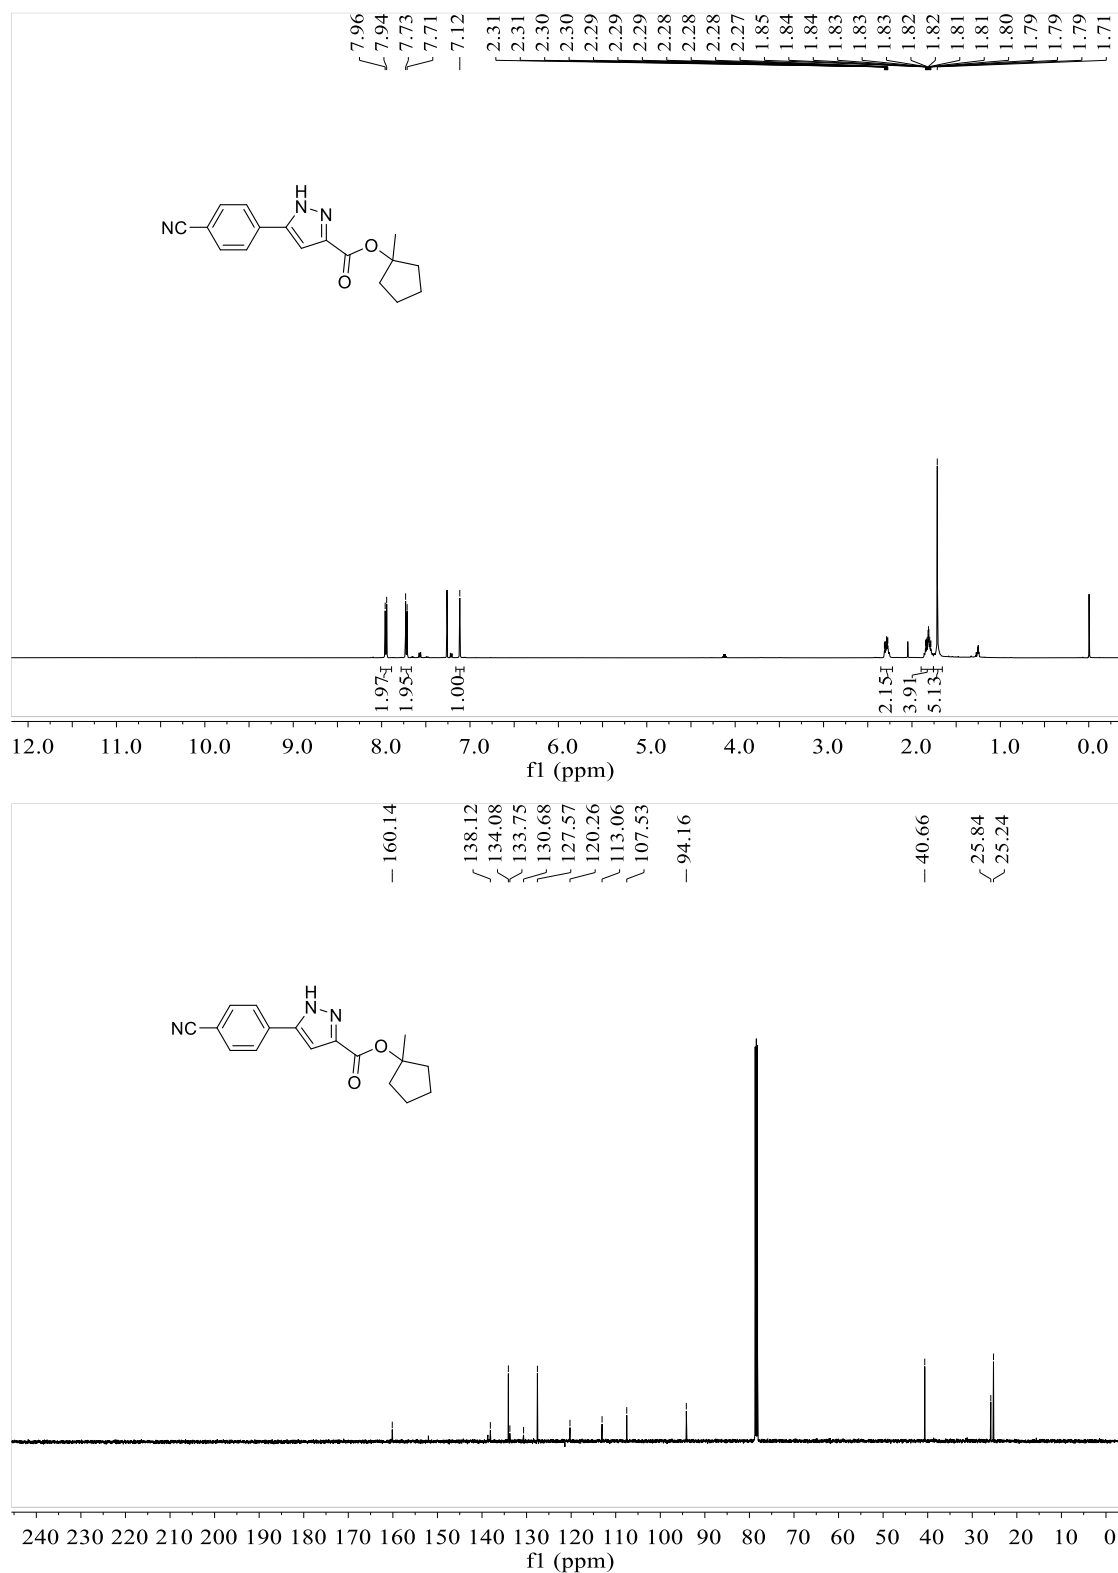

<sup>1</sup>H NMR (500 MHz, CDCl<sub>3</sub>) and <sup>13</sup>C NMR (126 MHz, CDCl<sub>3</sub>) spectra for **85d**:

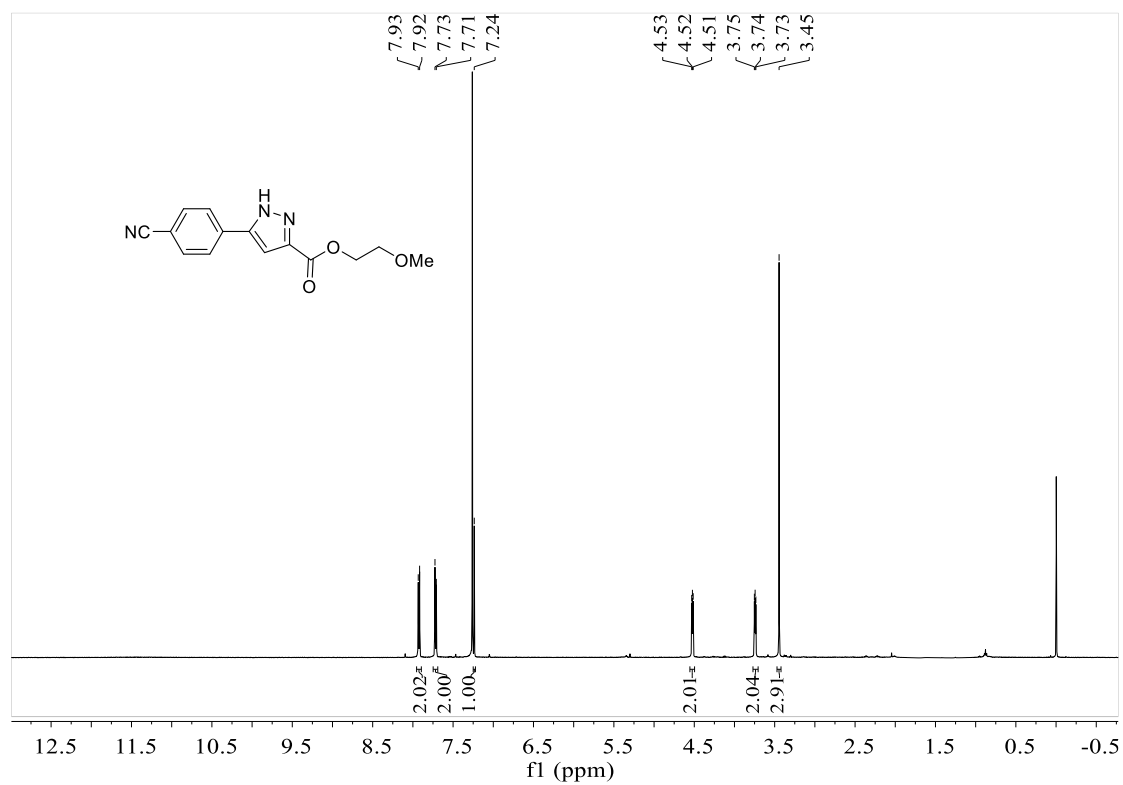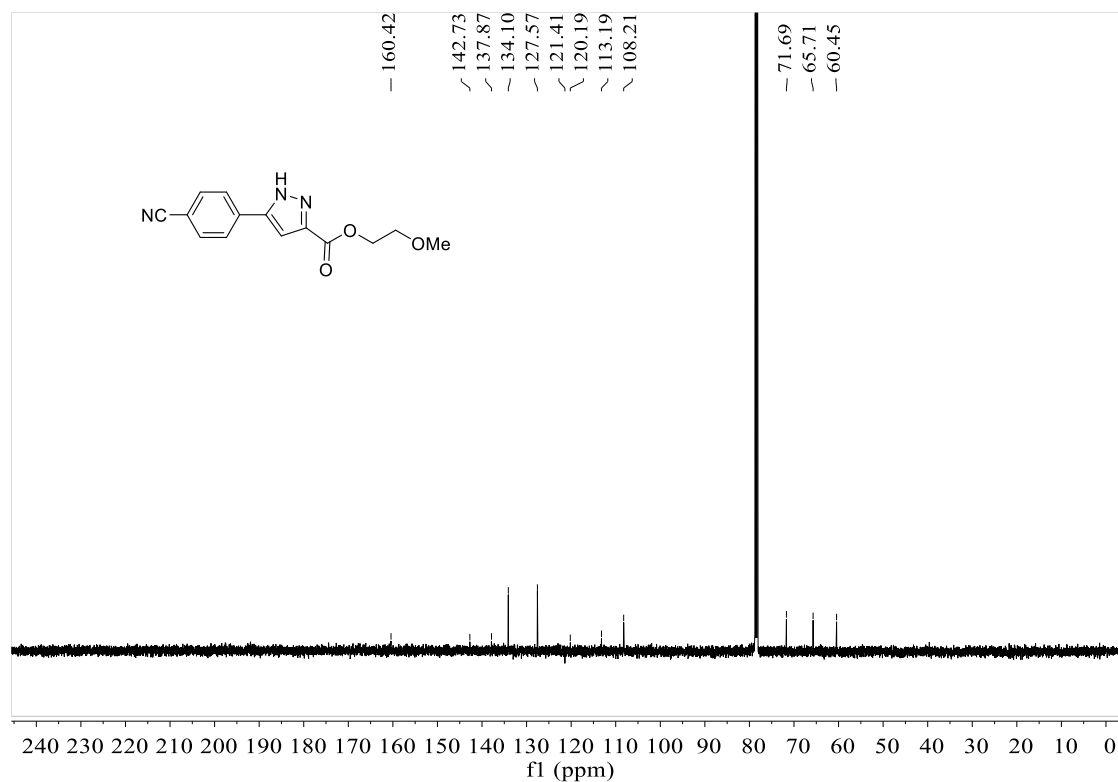



<sup>1</sup>H NMR (500 MHz, CDCl<sub>3</sub>) and <sup>13</sup>C NMR (126 MHz, CDCl<sub>3</sub>) spectra for **86d**:

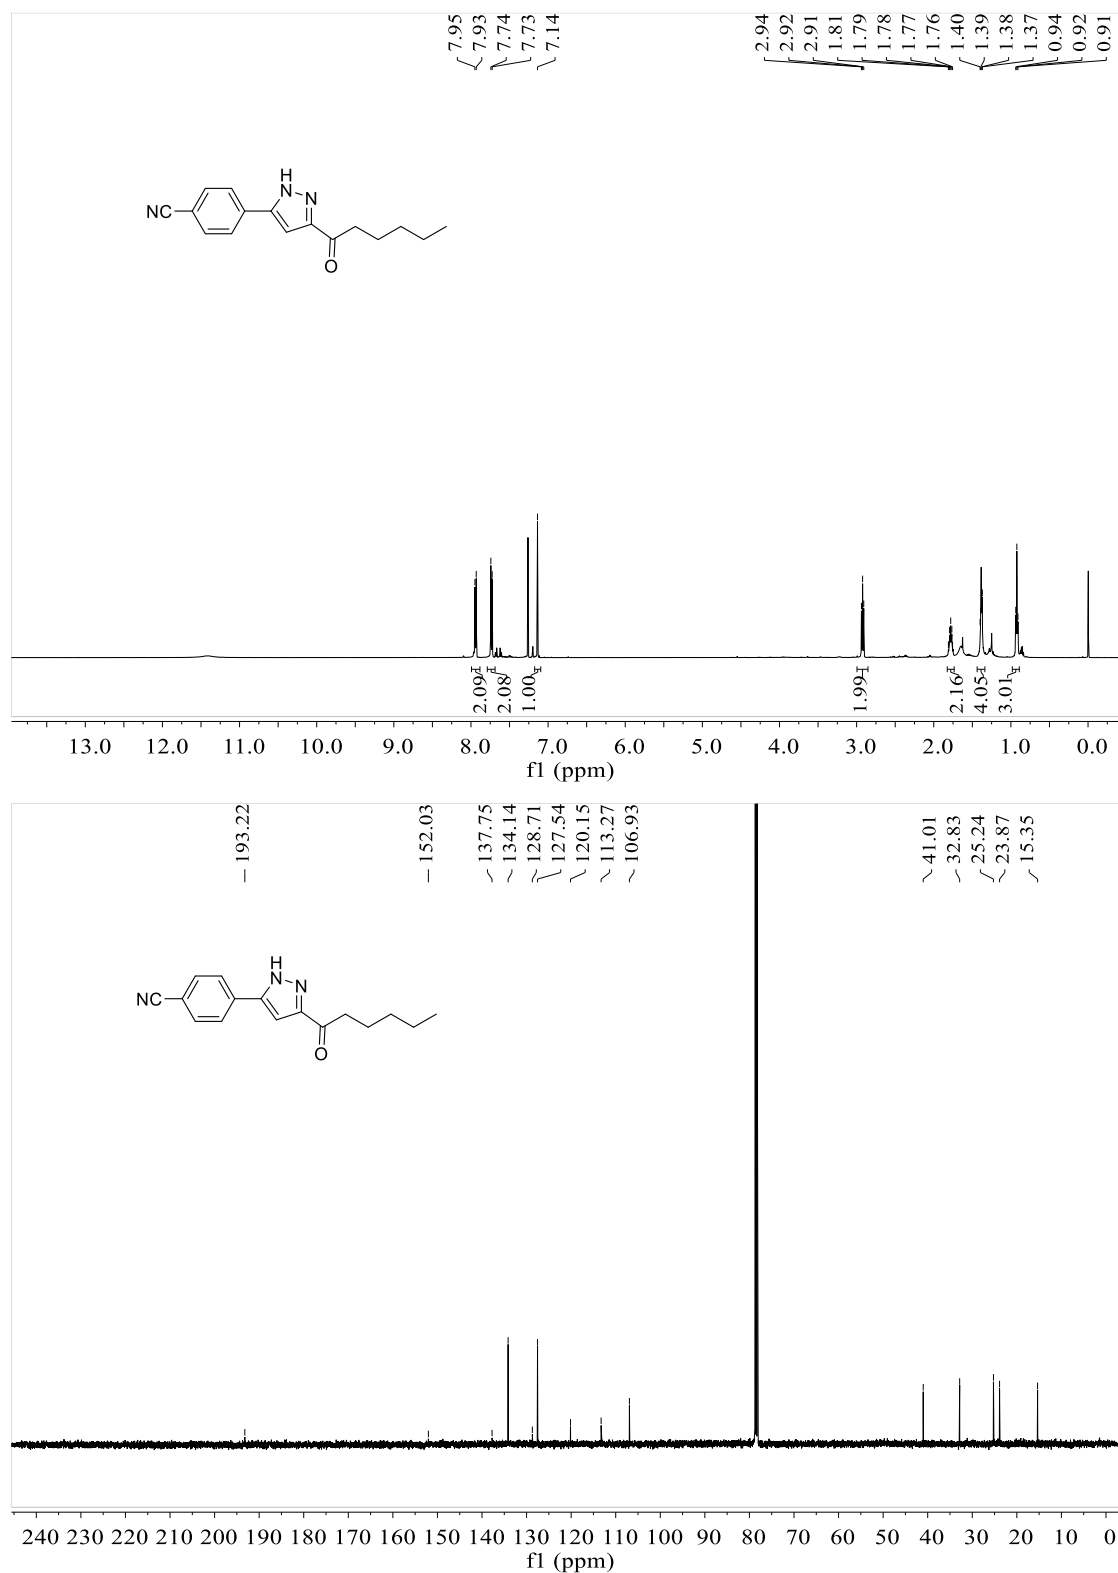

**$^1\text{H}$  NMR (500 MHz,  $\text{CD}_3\text{OD}$ ) and  $^{13}\text{C}$  NMR (126 MHz,  $\text{CD}_3\text{OD}$ ) spectra for **87d**:**

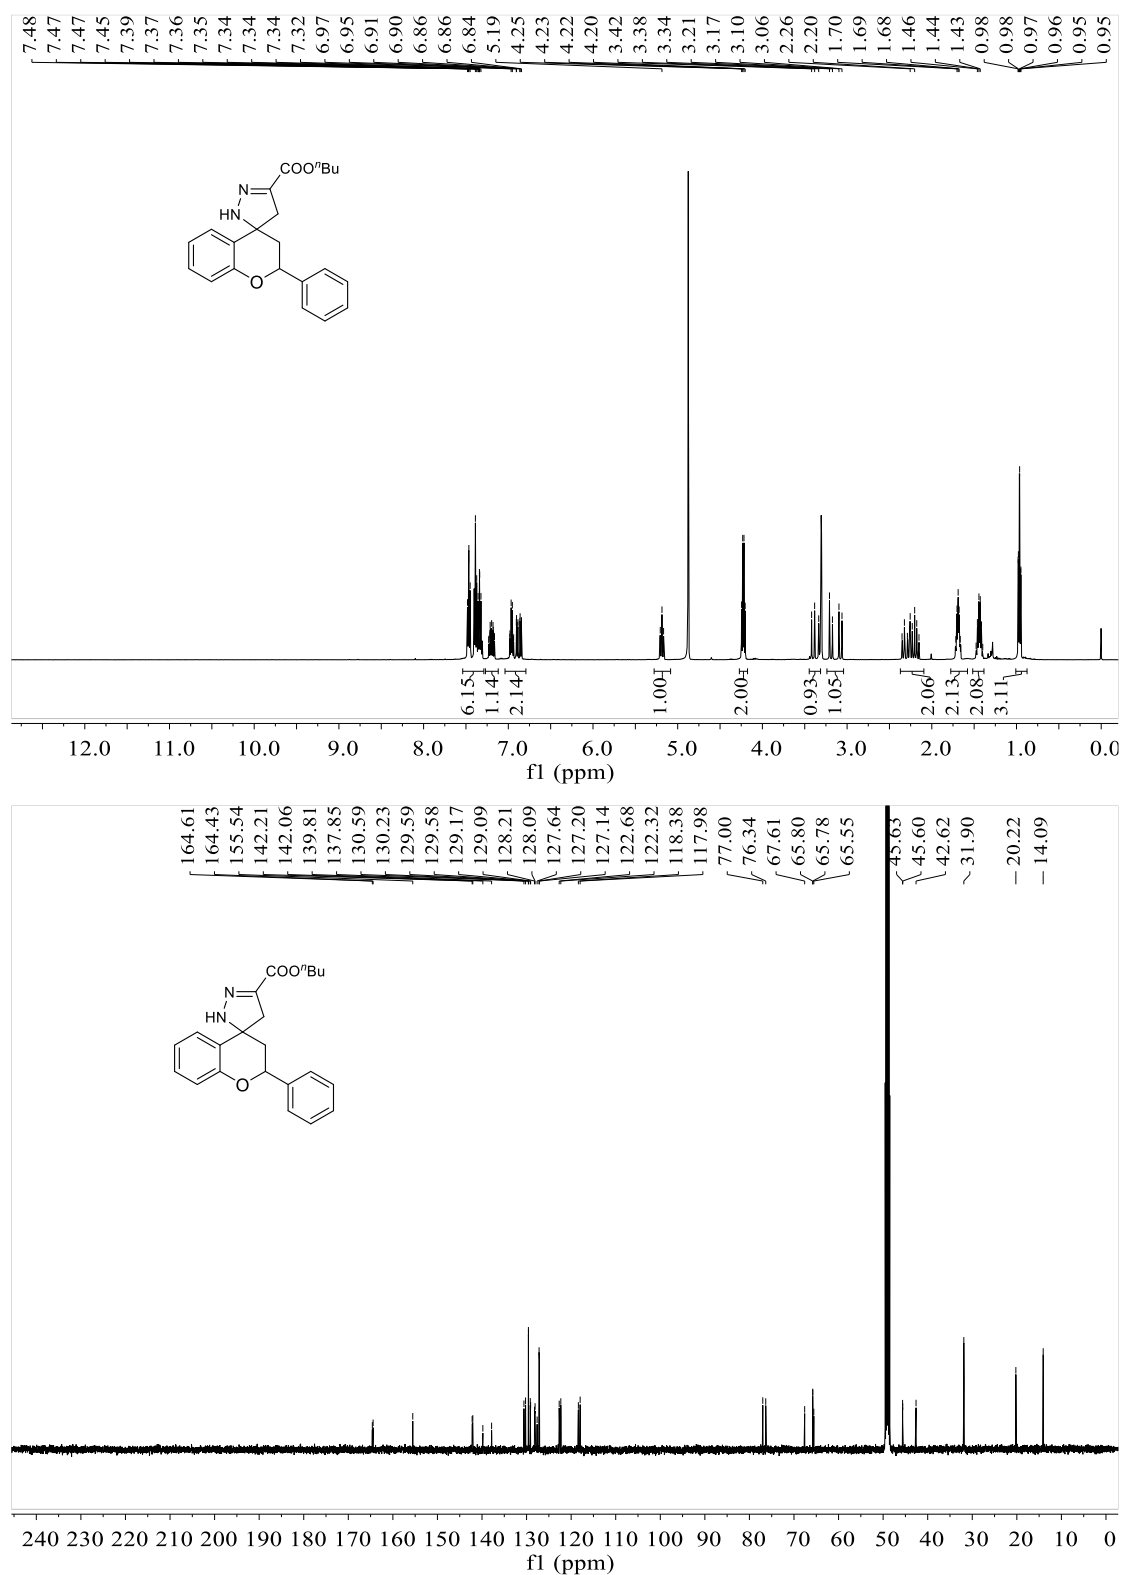

**$^1\text{H}$  NMR (500 MHz,  $\text{CD}_3\text{OD}$ ) and  $^{13}\text{C}$  NMR (126 MHz,  $\text{CD}_3\text{OD}$ ) spectra for **88d**:**

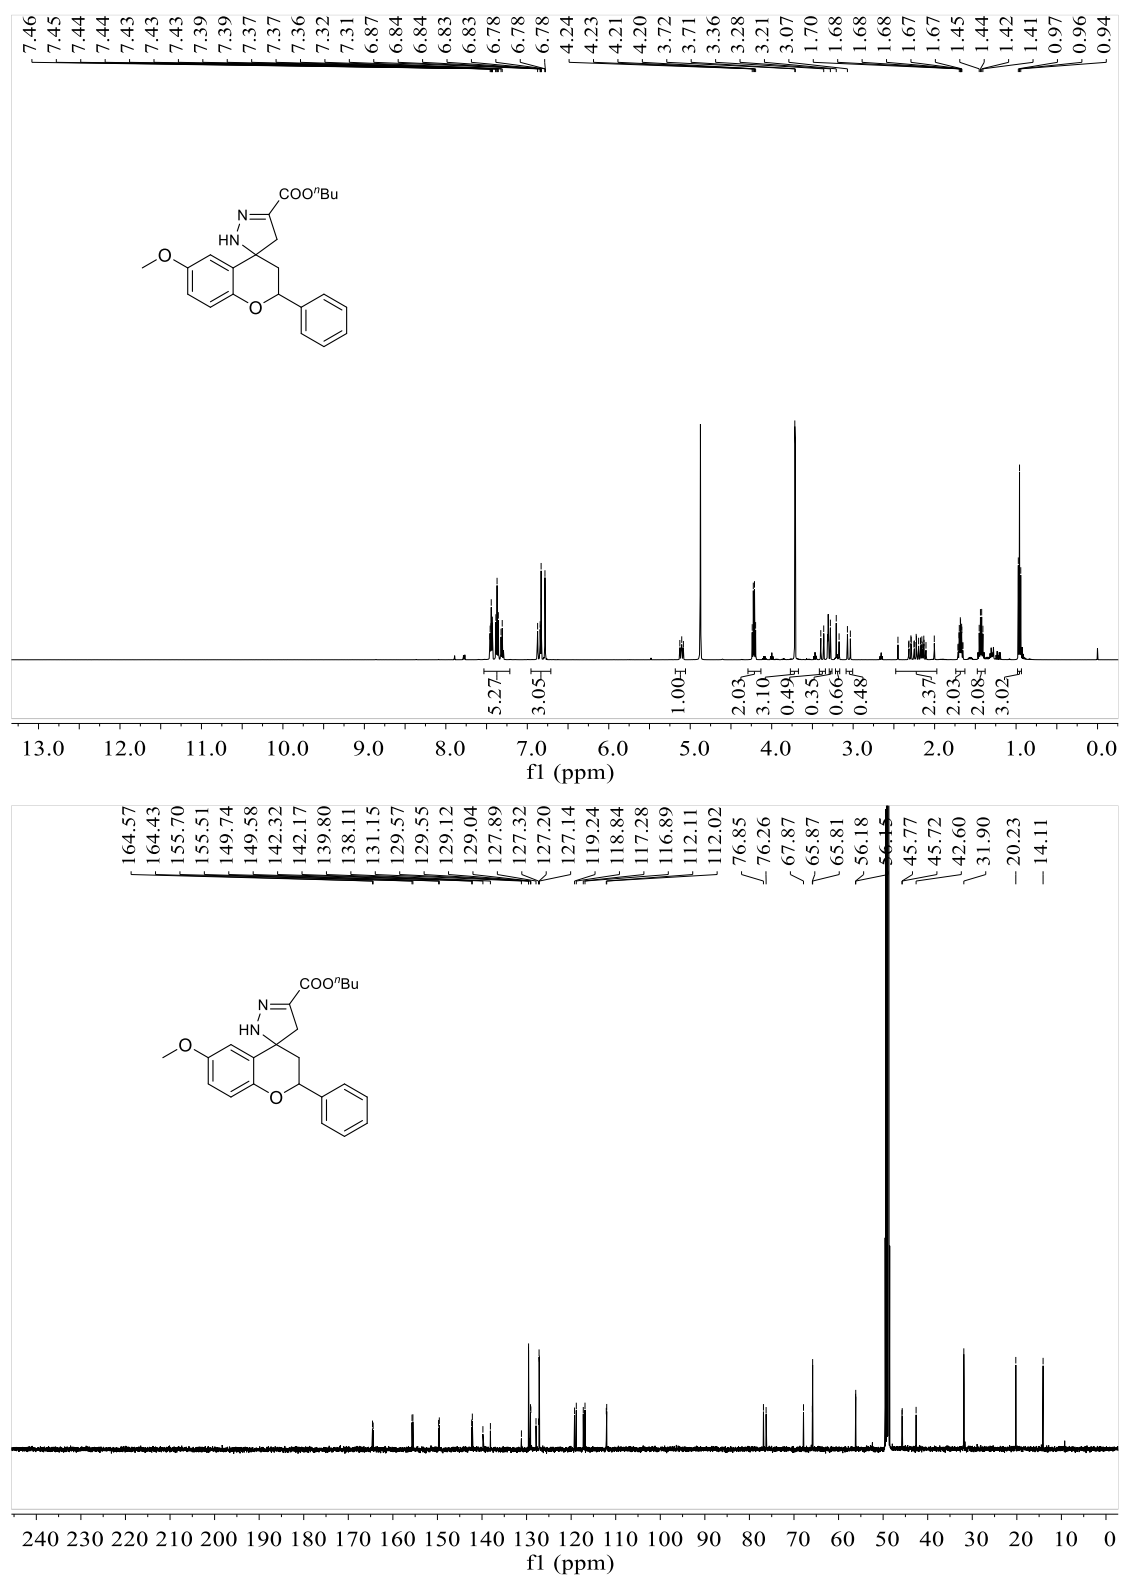

**$^1\text{H}$  NMR (500 MHz,  $\text{CD}_3\text{OD}$ ) and  $^{13}\text{C}$  NMR (126 MHz,  $\text{CD}_3\text{OD}$ ) spectra for **89d**:**

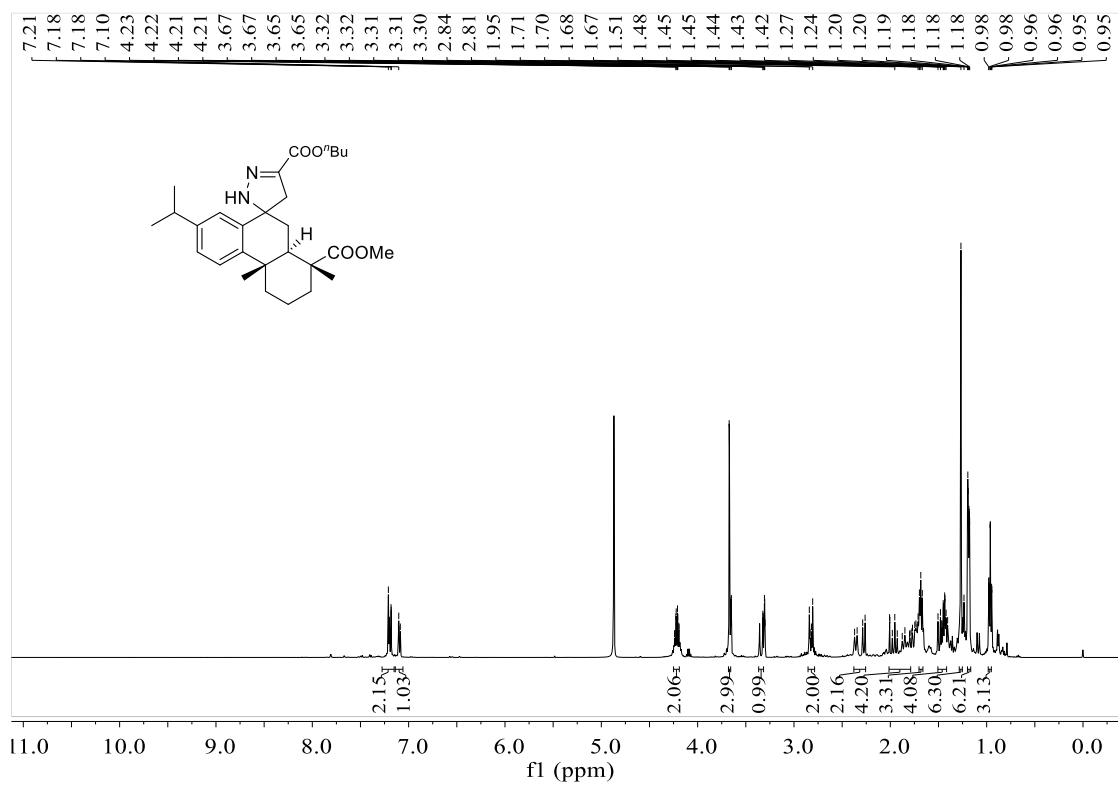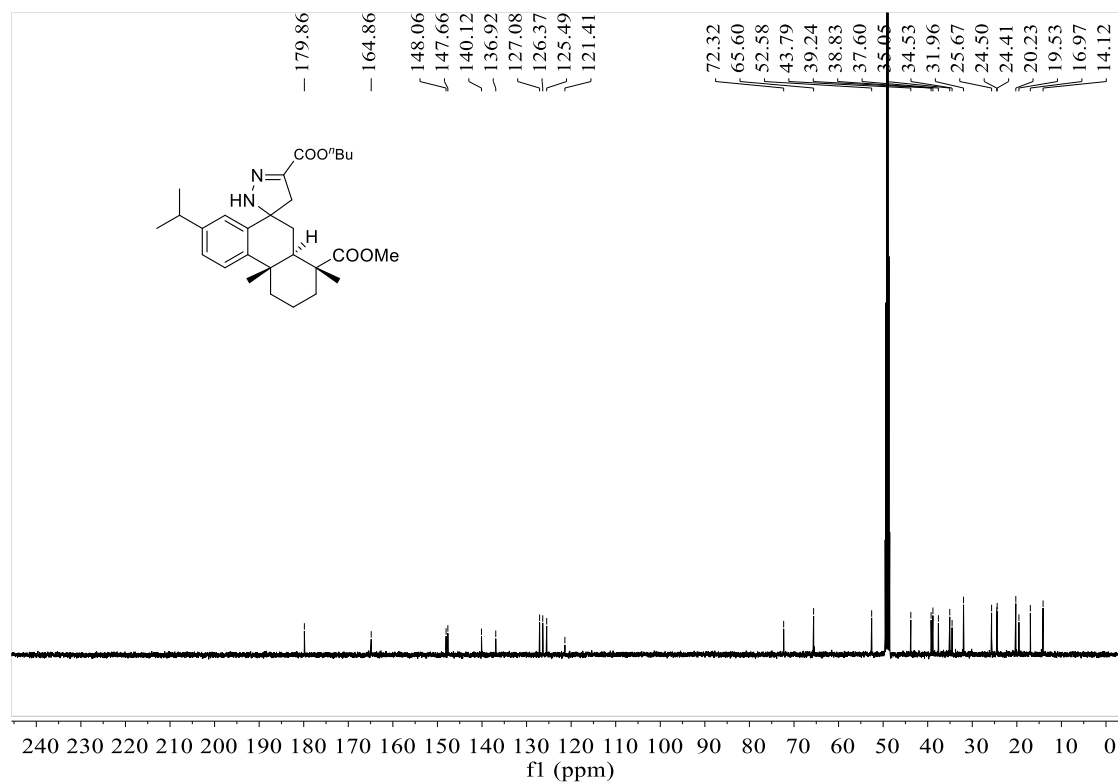

**<sup>1</sup>H NMR (500 MHz, CD<sub>3</sub>OD) and <sup>13</sup>C NMR (126 MHz, CD<sub>3</sub>OD) spectra for 90d:**

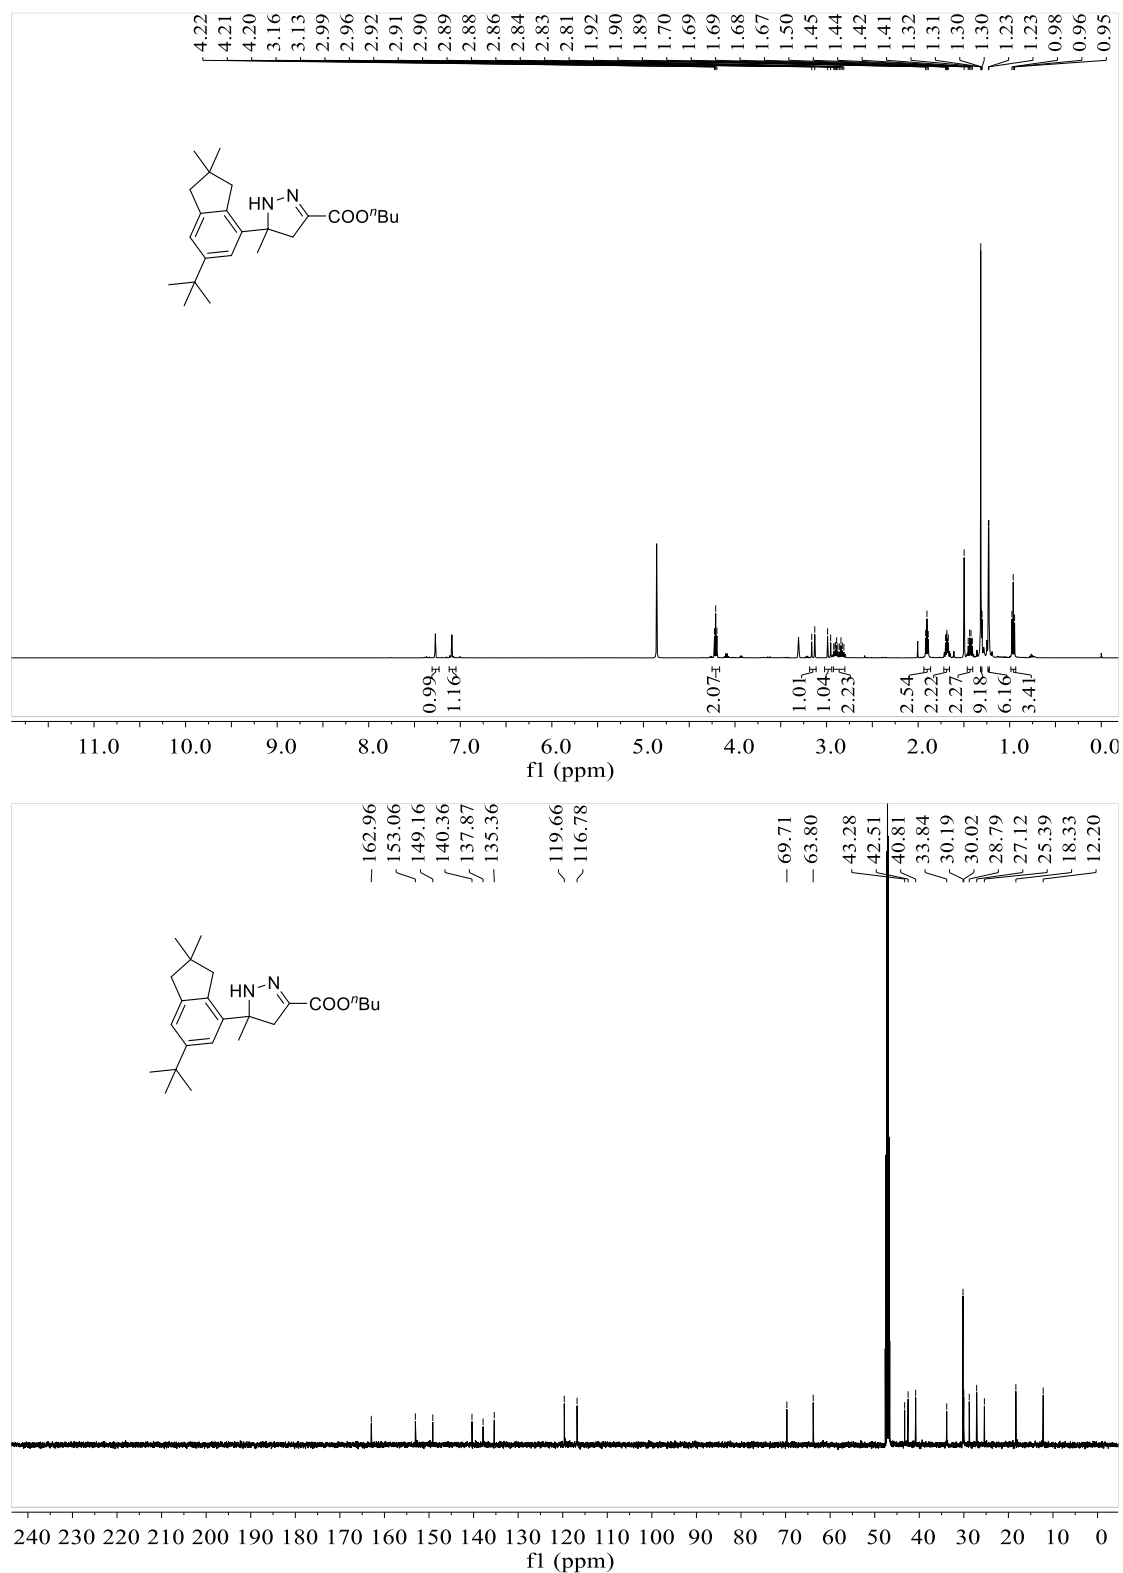

**<sup>1</sup>H NMR (500 MHz, CD<sub>3</sub>OD) and <sup>13</sup>C NMR (126 MHz, CD<sub>3</sub>OD) spectra for 91d:**

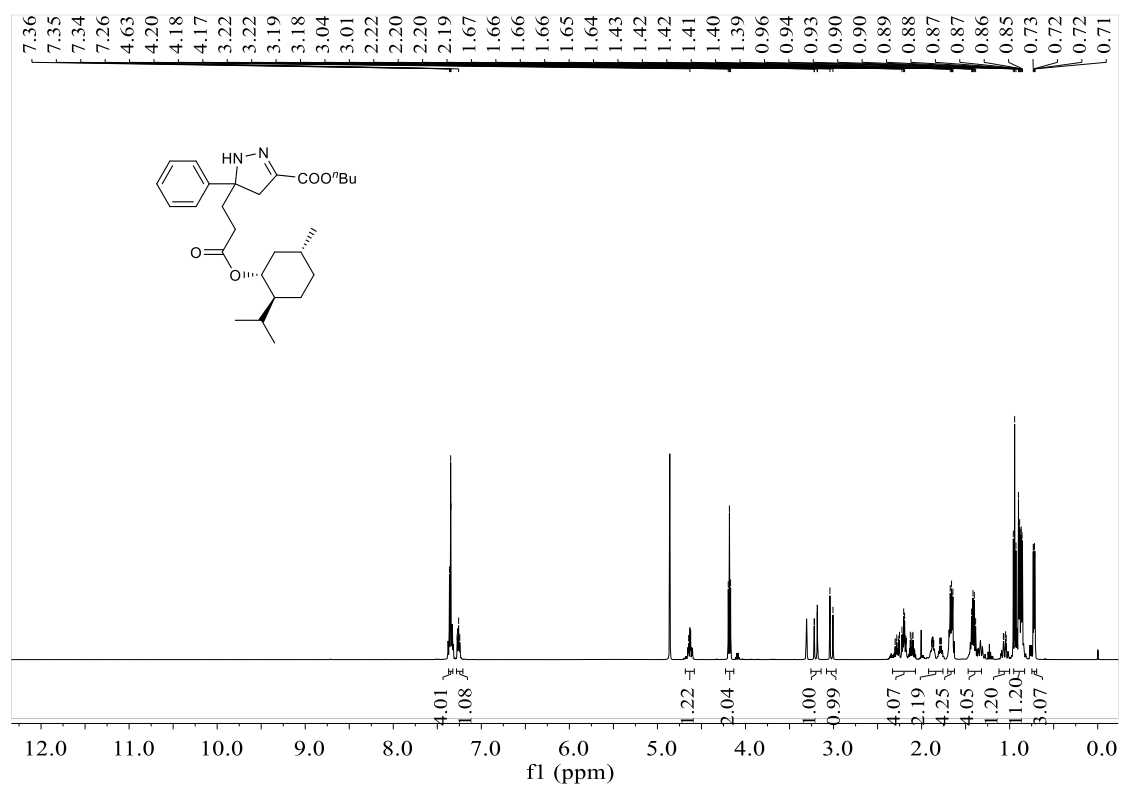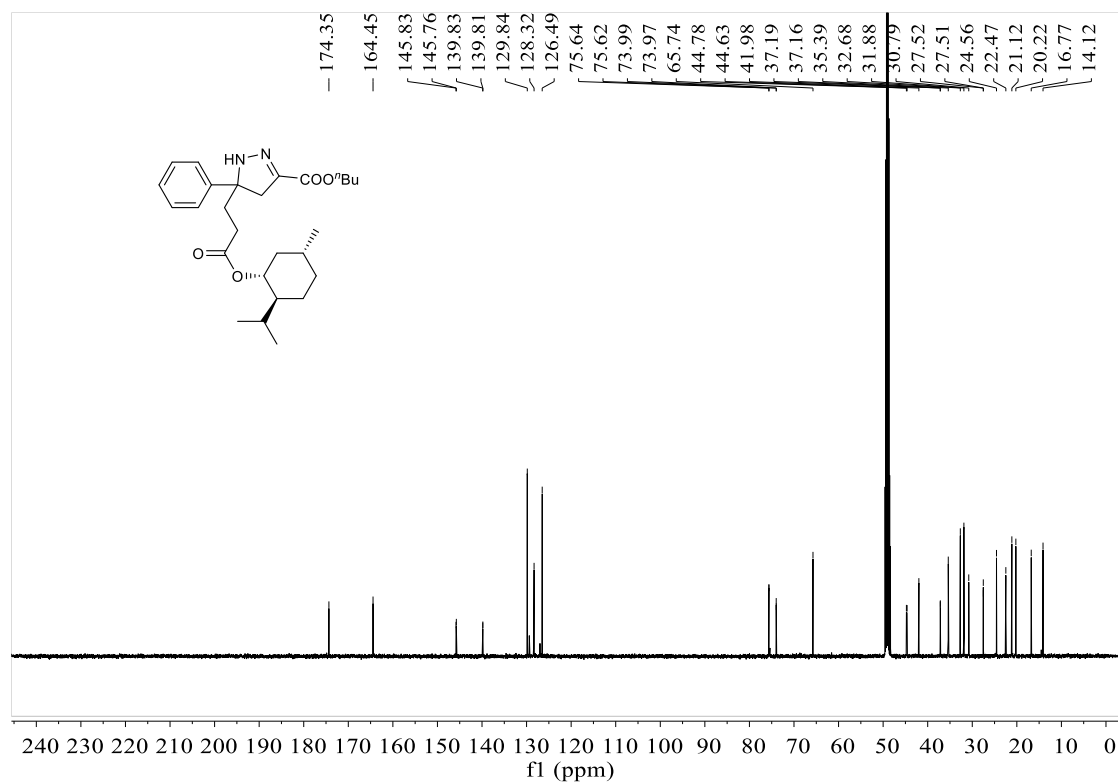

**$^1\text{H}$  NMR (500 MHz,  $\text{CD}_3\text{OD}$ ) and  $^{13}\text{C}$  NMR (126 MHz,  $\text{CD}_3\text{OD}$ ) spectra for **92d**:**

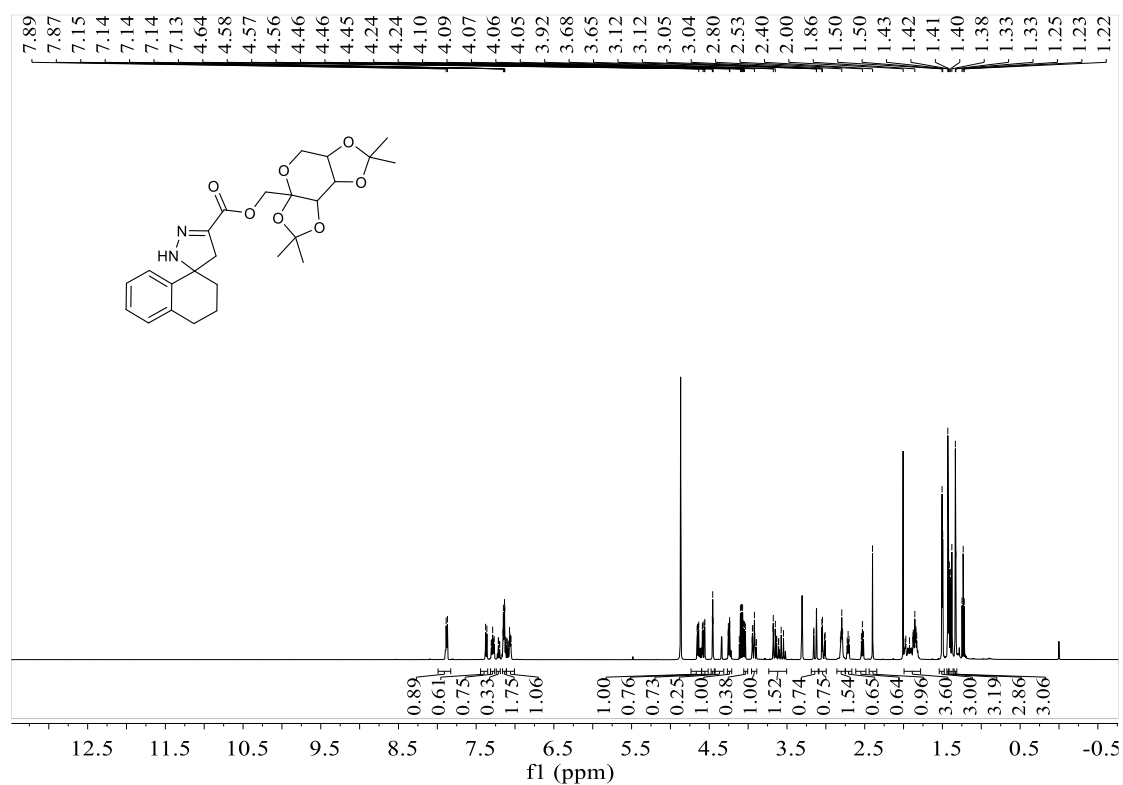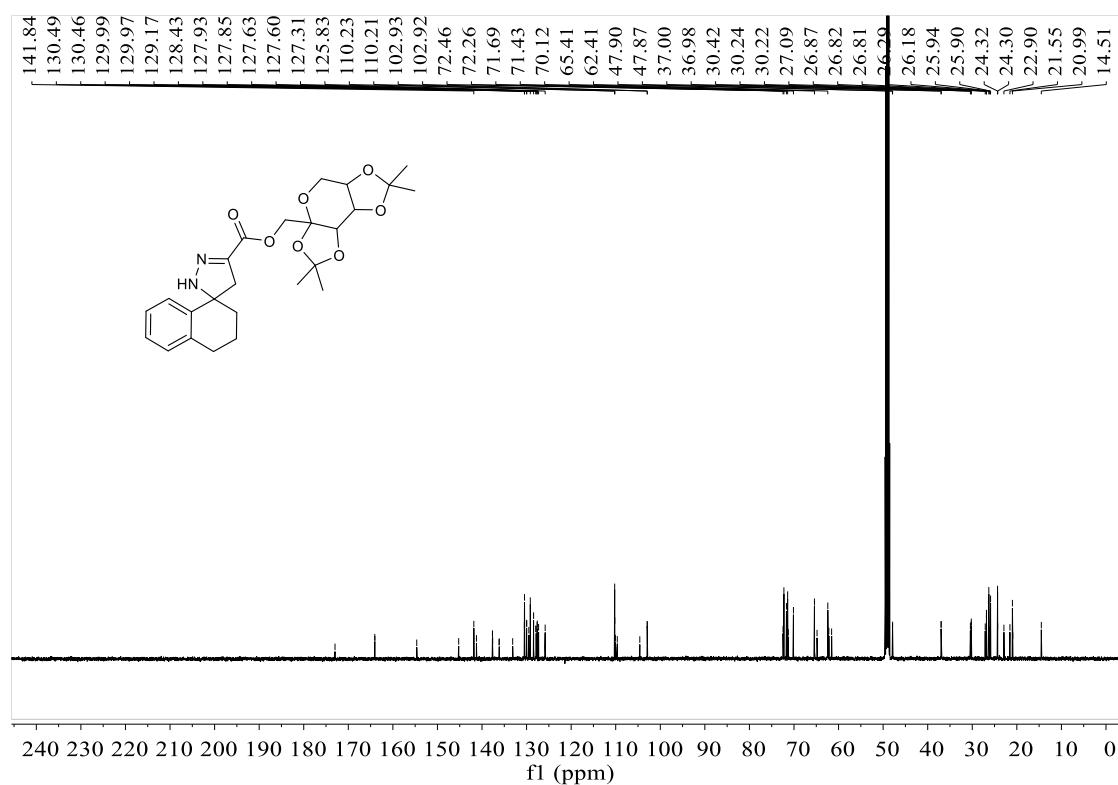

**$^1\text{H}$  NMR (500 MHz,  $\text{CD}_3\text{OD}$ ) and  $^{13}\text{C}$  NMR (126 MHz,  $\text{CD}_3\text{OD}$ ) spectra for **93d**:**

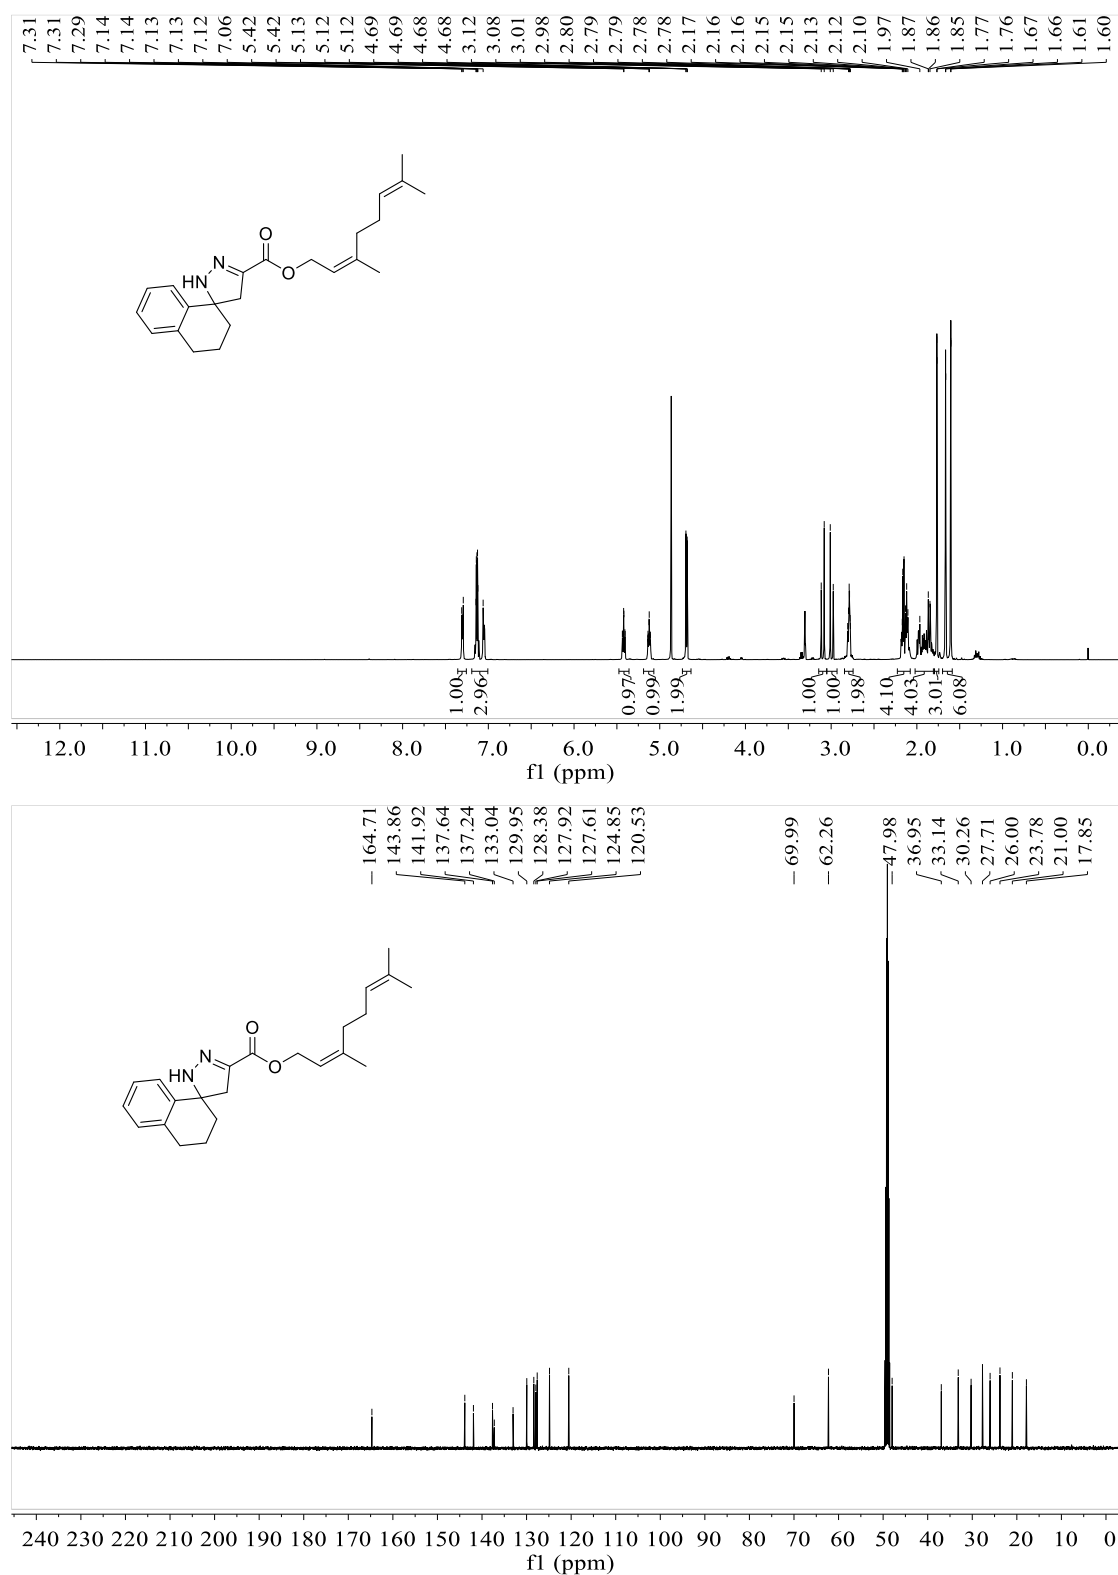



**$^1\text{H}$  NMR (500 MHz,  $\text{CD}_3\text{OD}$ ) and  $^{13}\text{C}$  NMR (126 MHz,  $\text{CD}_3\text{OD}$ ) spectra for **94d**:**

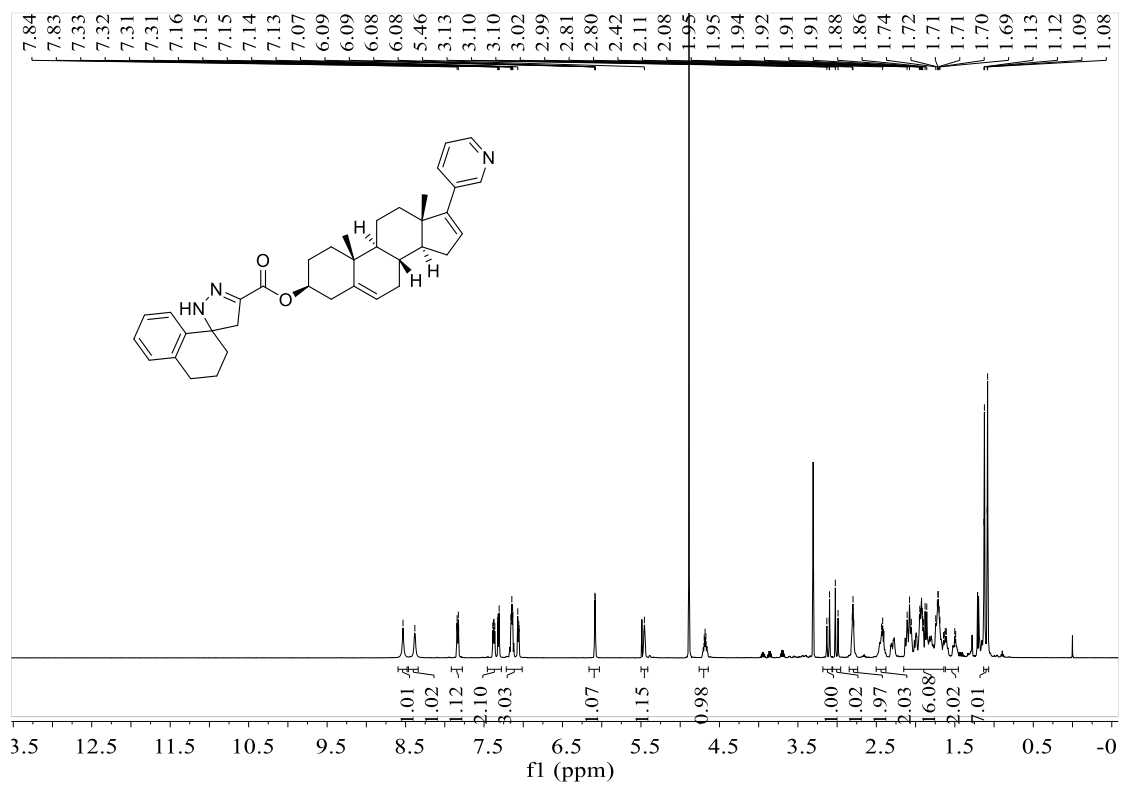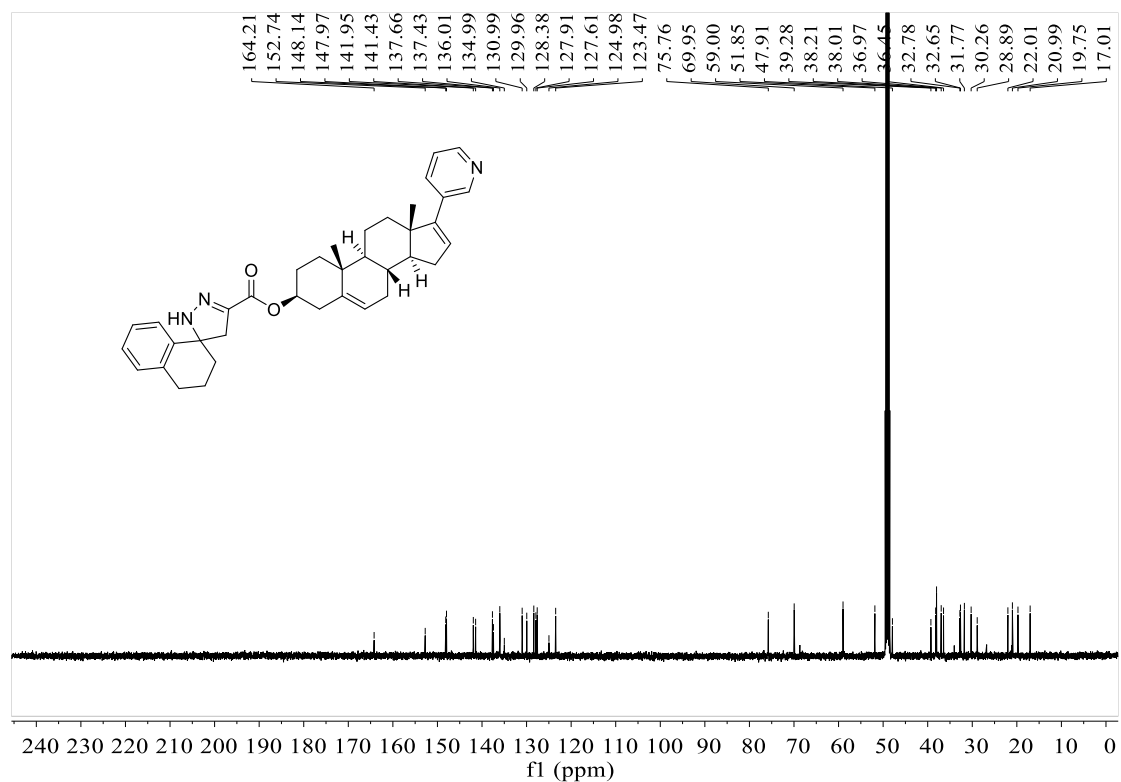

**<sup>1</sup>H NMR (500 MHz, CD<sub>3</sub>OD) and <sup>13</sup>C NMR (126 MHz, CD<sub>3</sub>OD) spectra for 95d:**

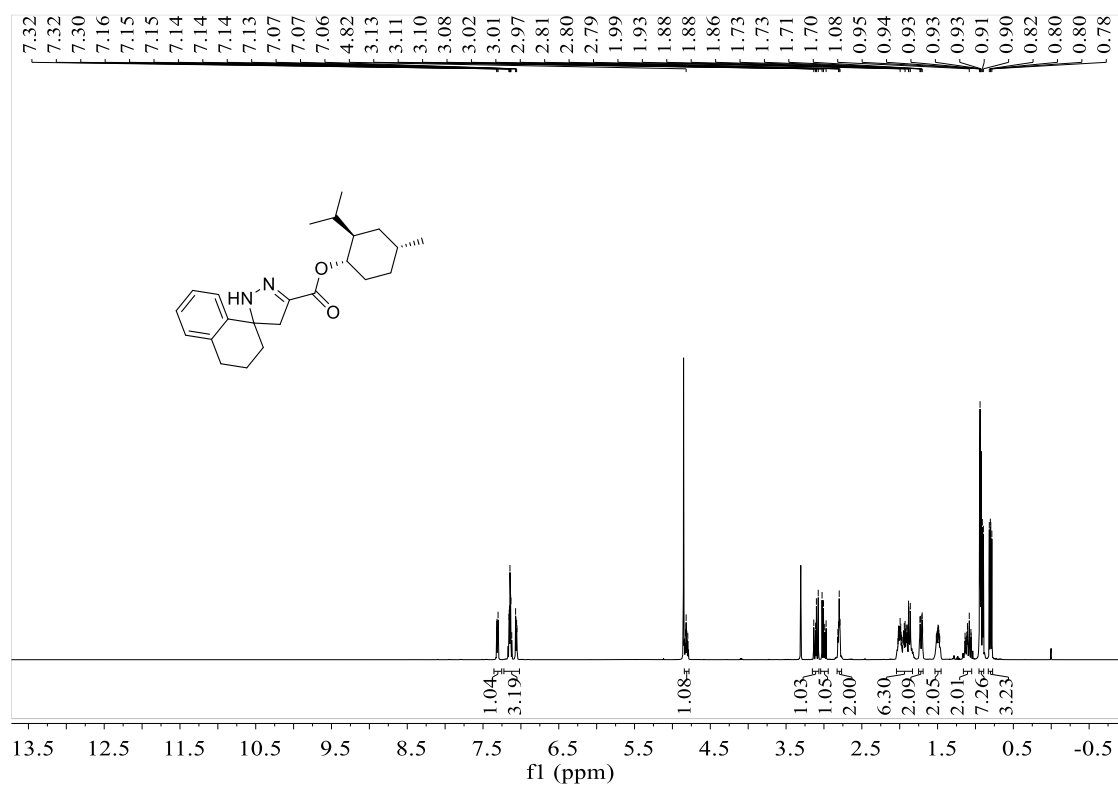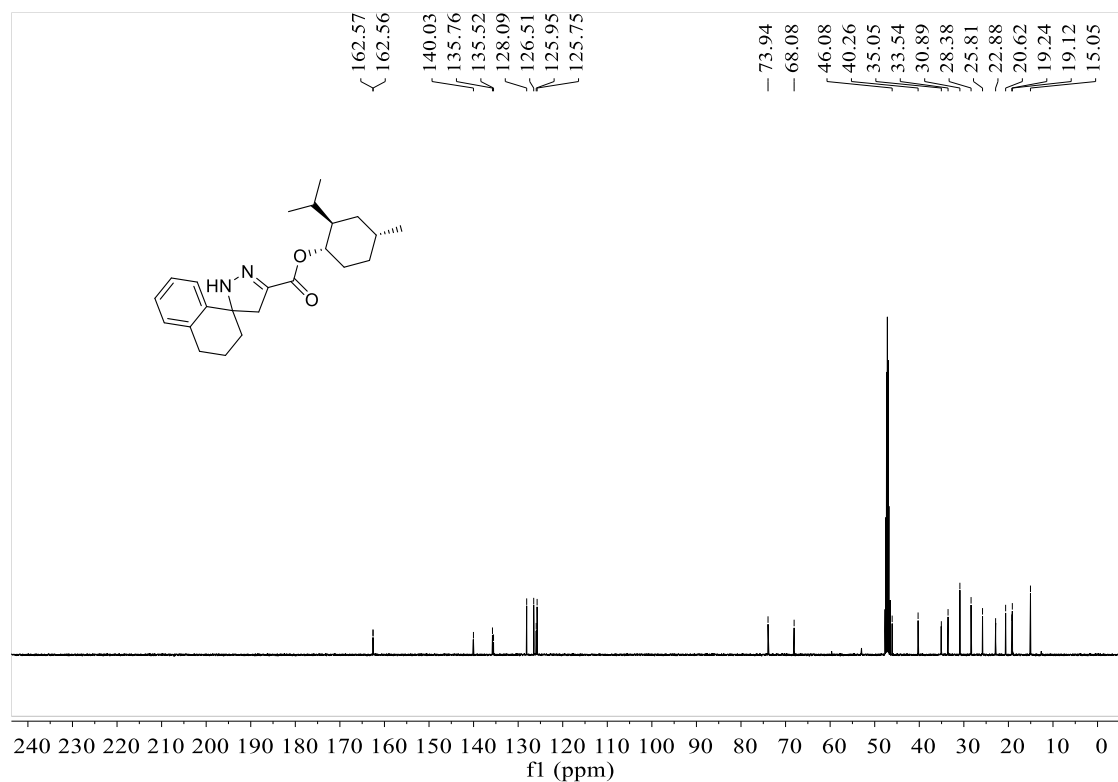

**$^1\text{H}$  NMR (500 MHz,  $\text{CD}_3\text{OD}$ ) and  $^{13}\text{C}$  NMR (126 MHz,  $\text{CD}_3\text{OD}$ ) spectra for **96d**:**

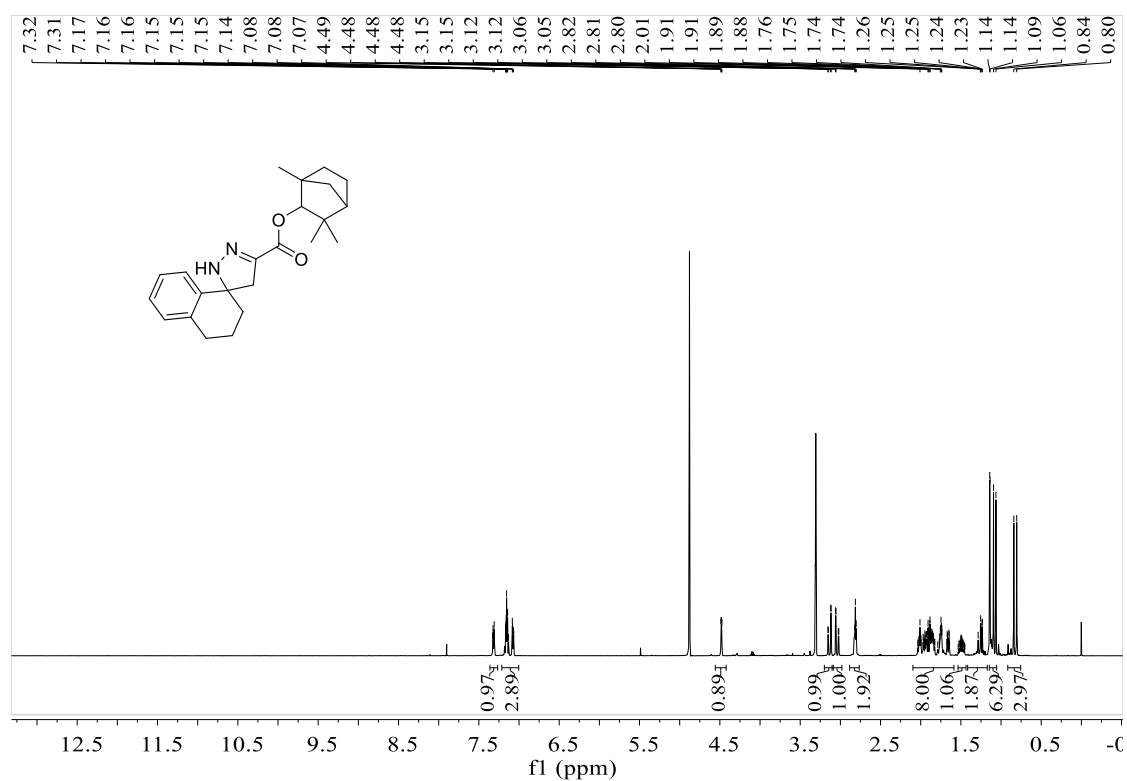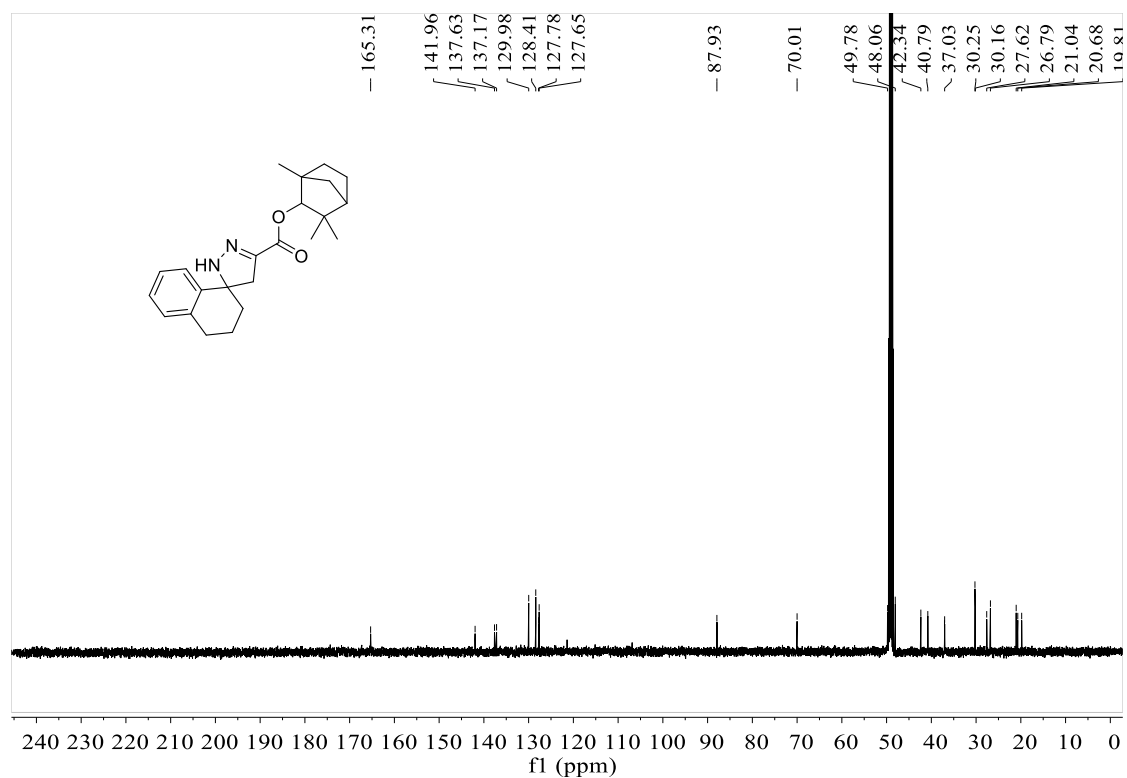

**<sup>1</sup>H NMR (500 MHz, CD<sub>3</sub>OD) and <sup>13</sup>C NMR (126 MHz, CD<sub>3</sub>OD) spectra for **97d**:**

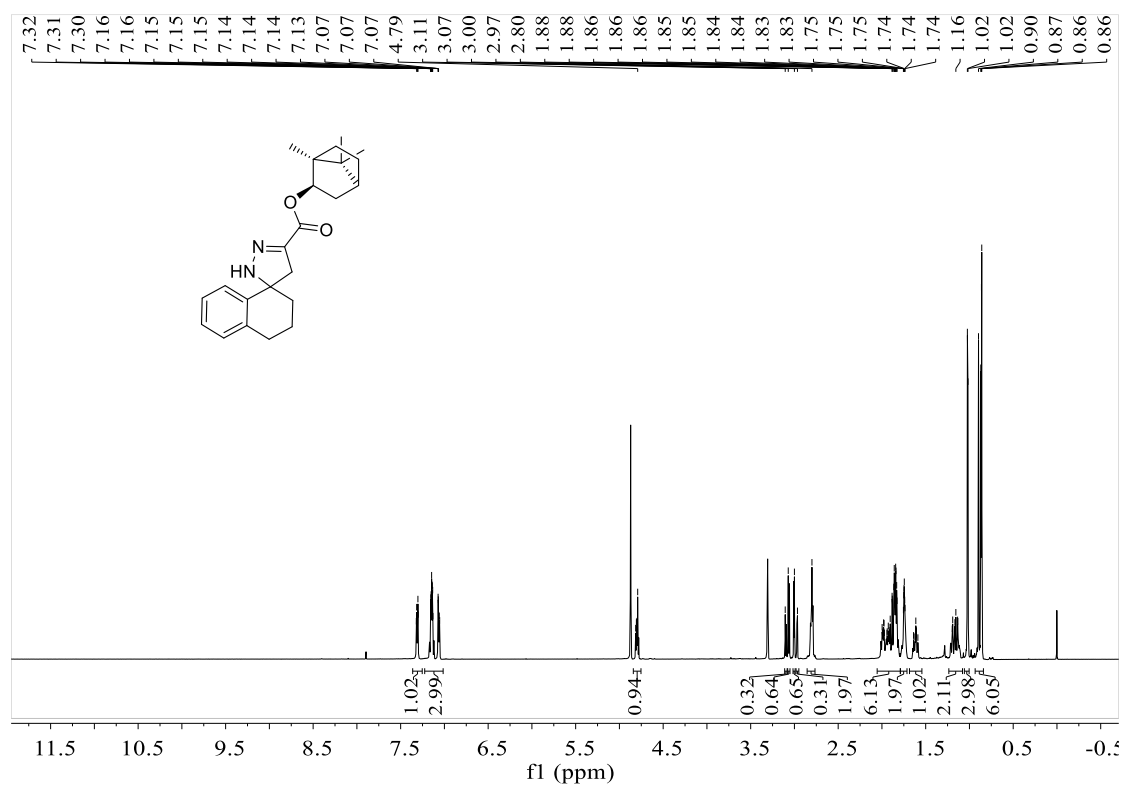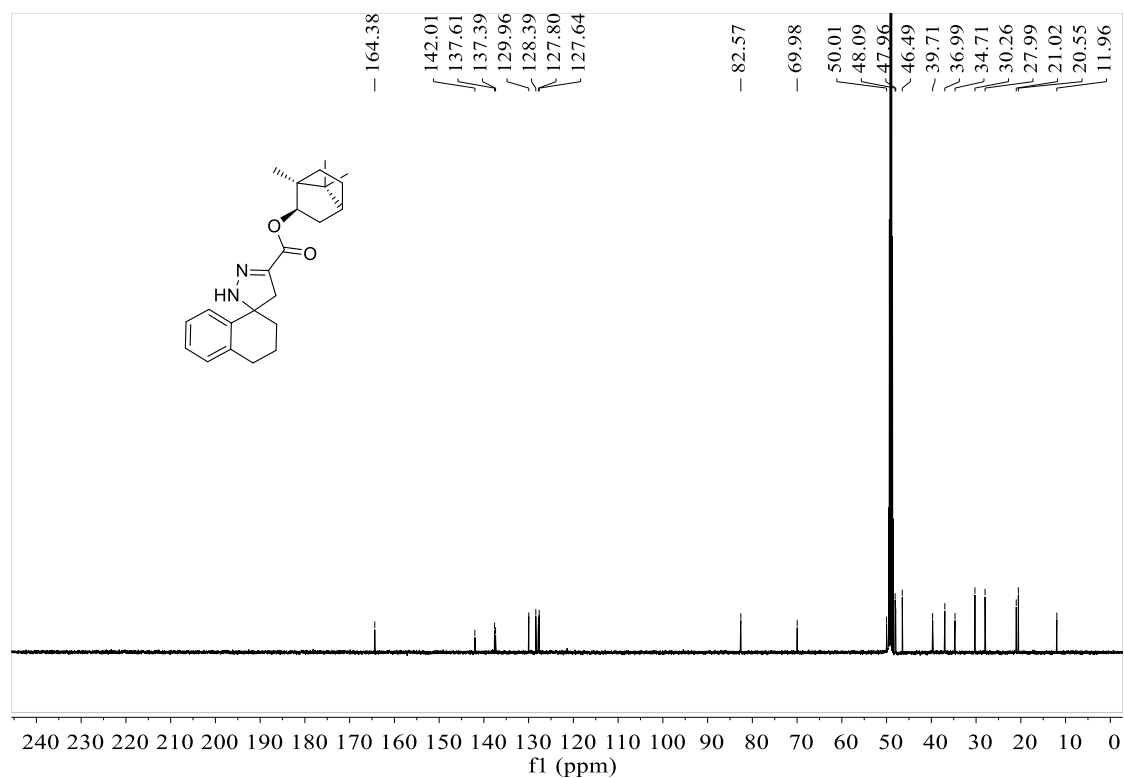

<sup>1</sup>H NMR (500 MHz, CDCl<sub>3</sub>) and <sup>13</sup>C NMR (126 MHz, CDCl<sub>3</sub>) spectra for **98d**:

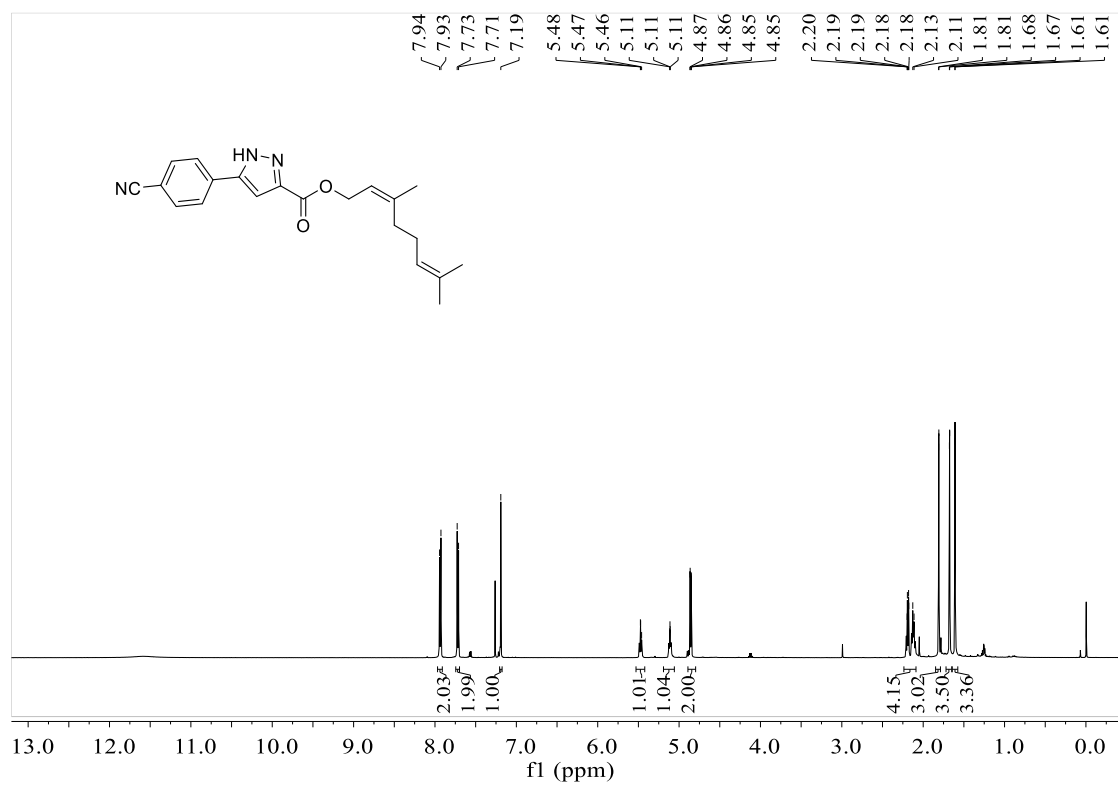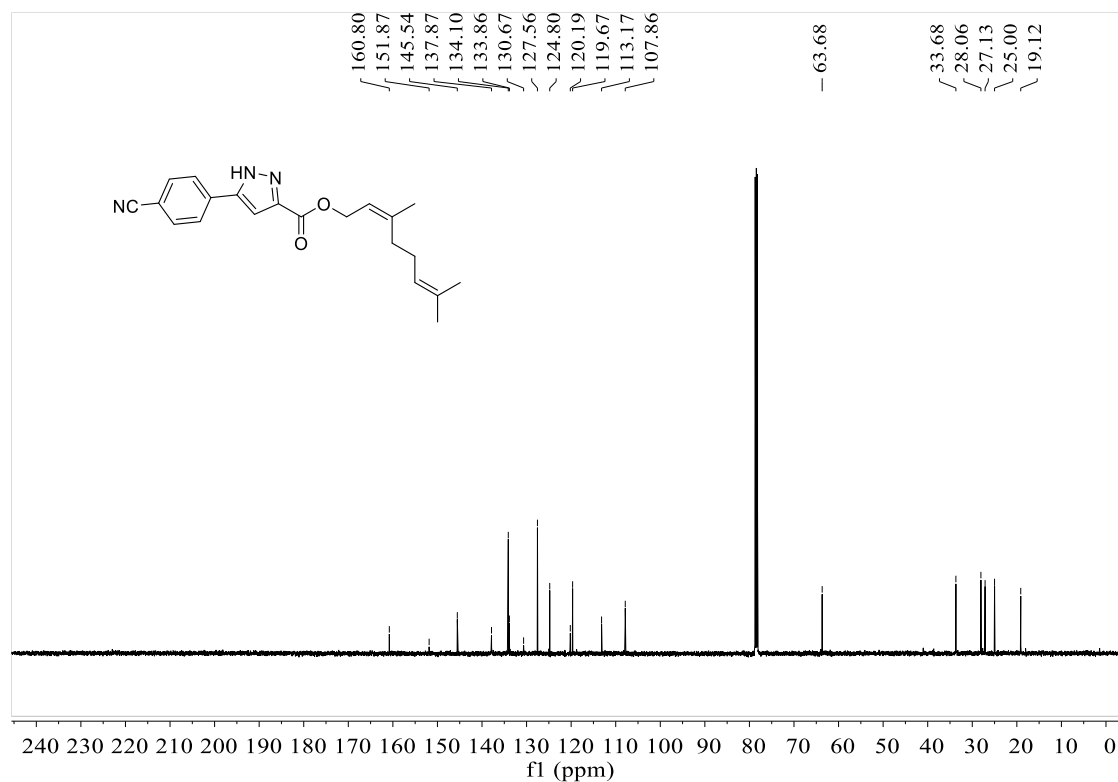

**<sup>1</sup>H NMR (500 MHz, CDCl<sub>3</sub>) and <sup>13</sup>C NMR (126 MHz, CDCl<sub>3</sub>) spectra for 99d:**

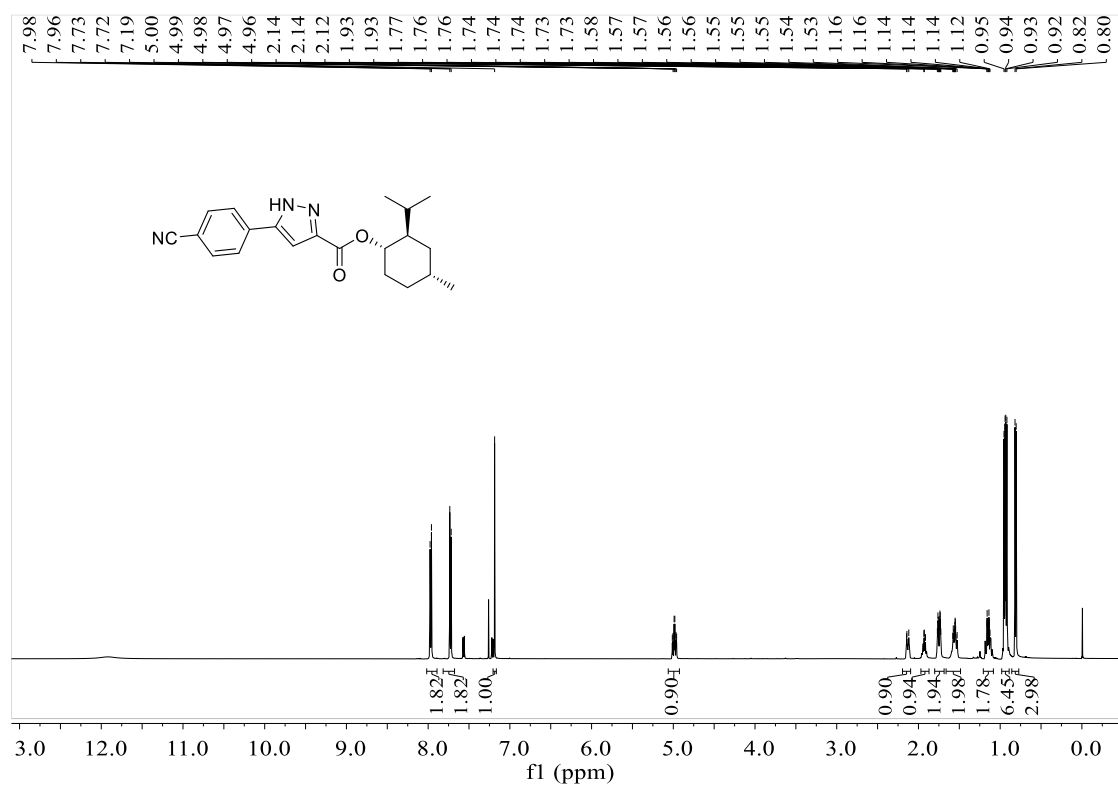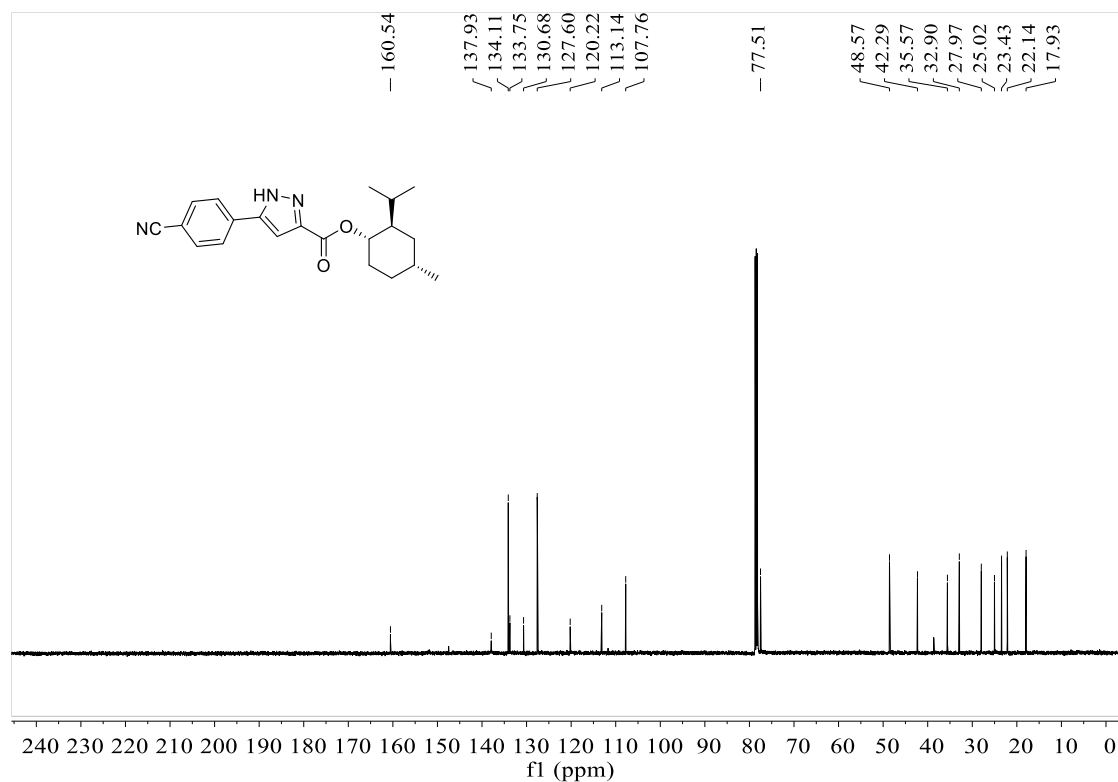

**<sup>1</sup>H NMR (500 MHz, CDCl<sub>3</sub>) and <sup>13</sup>C NMR (126 MHz, CDCl<sub>3</sub>) spectra for 100d:**

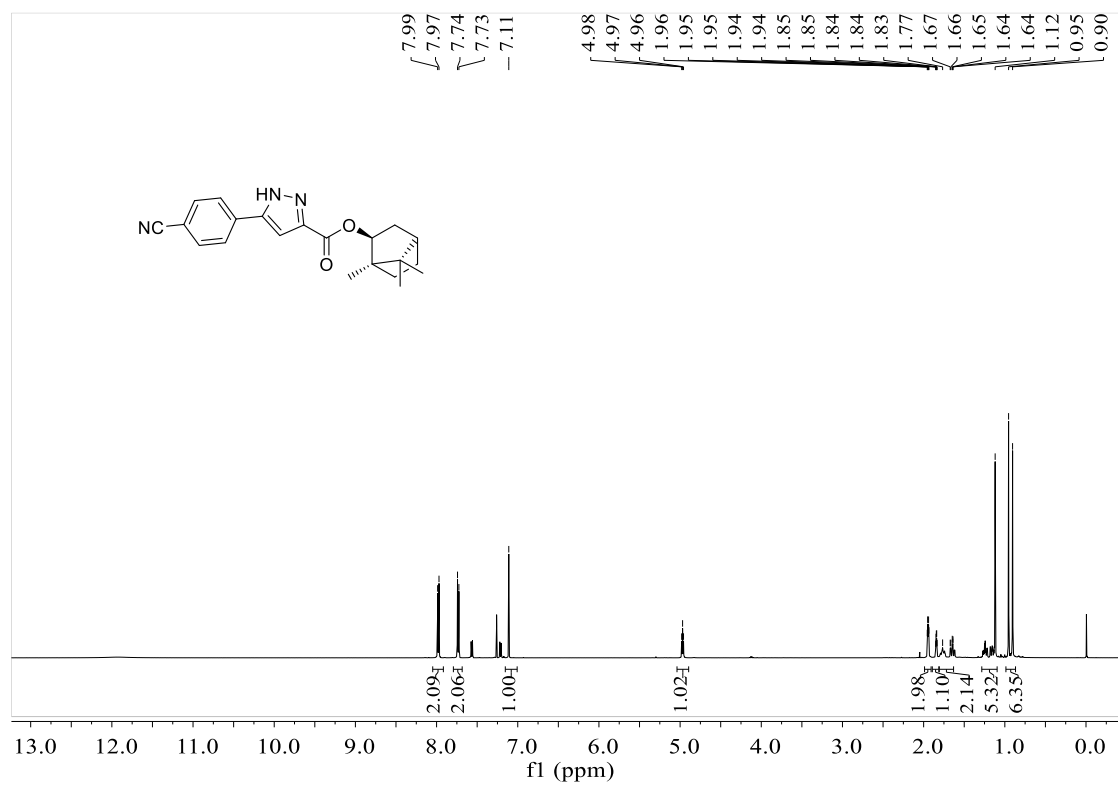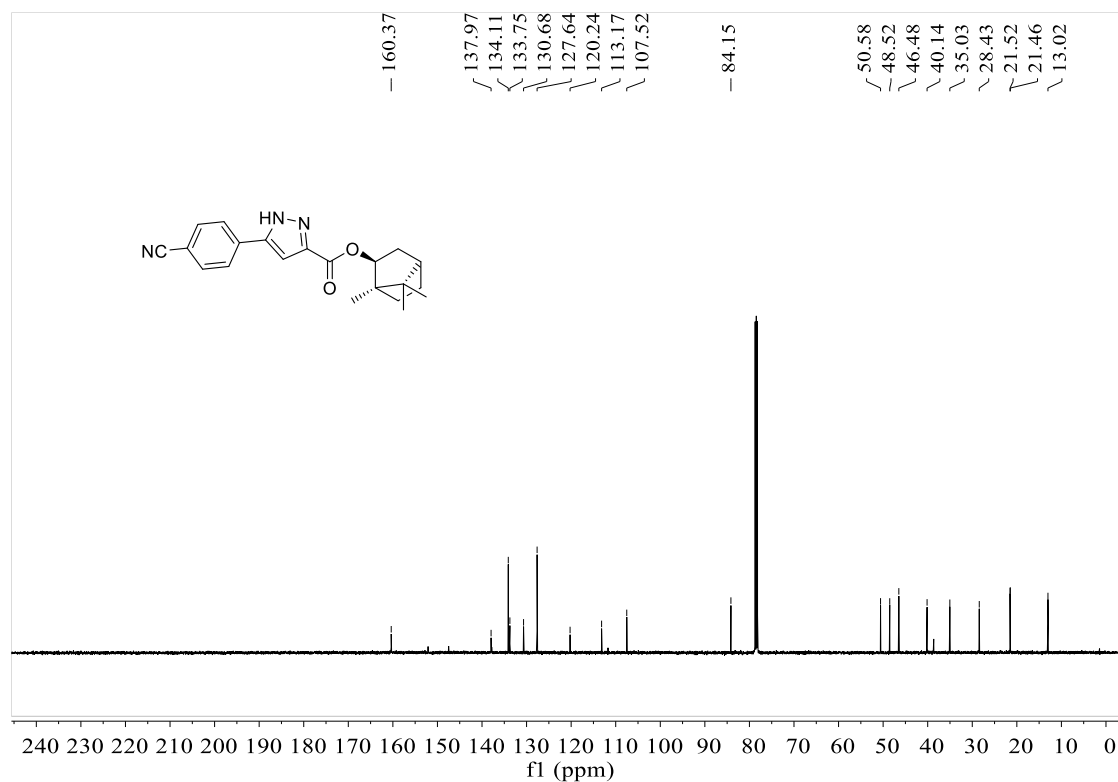

Characterization data for the *N*-tosylhydrazones

$^1\text{H}$  NMR (500 MHz,  $\text{CDCl}_3$ ) and  $^{13}\text{C}$  NMR (126 MHz,  $\text{CDCl}_3$ ) spectra for **1b**:

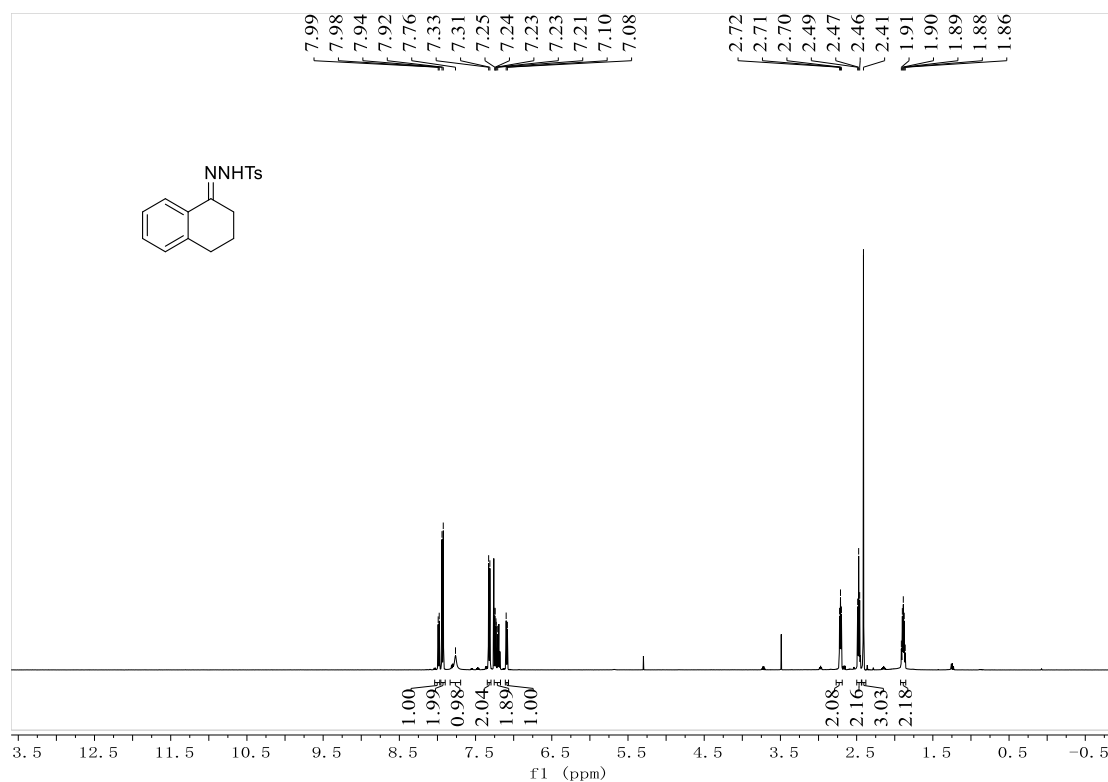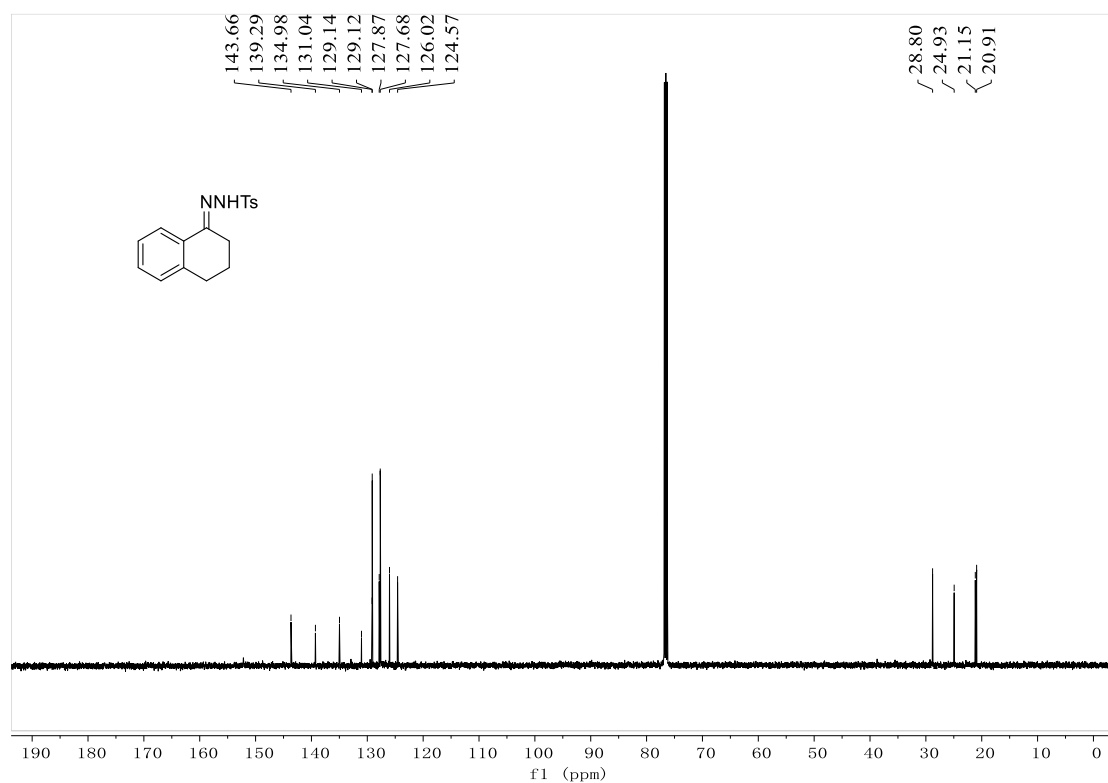



**<sup>1</sup>H NMR (500 MHz, DMSO-*d*<sub>6</sub>) spectra for **2b**:**

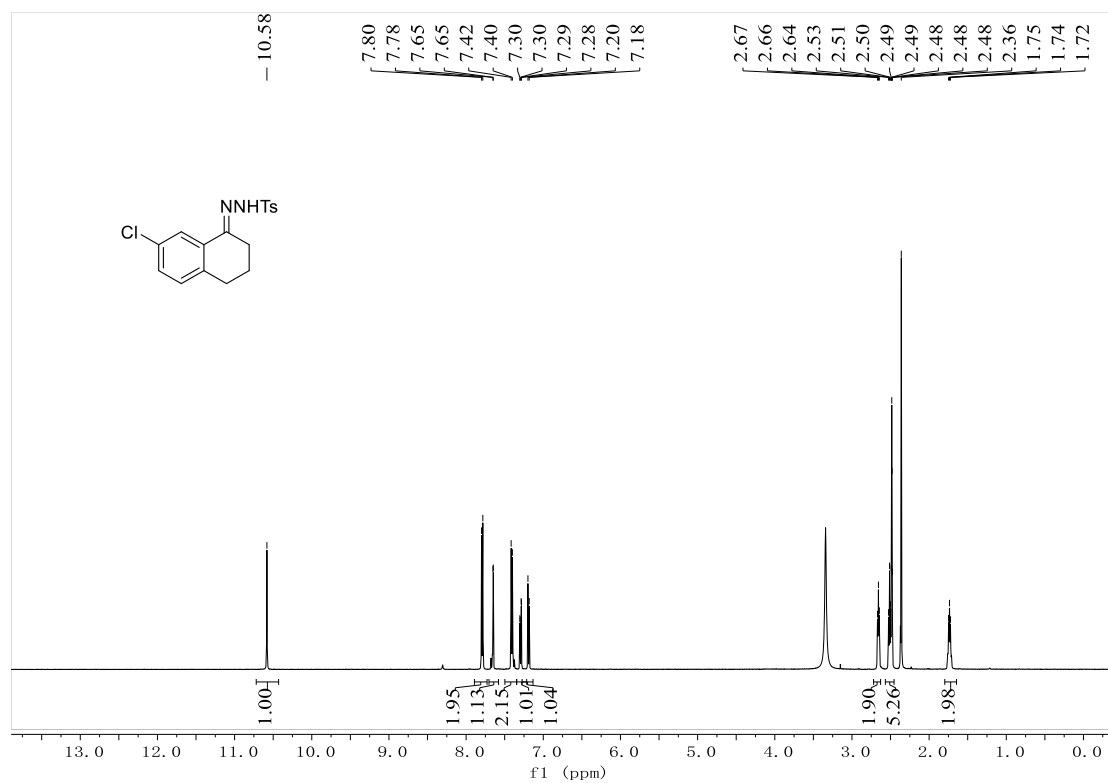

**<sup>1</sup>H NMR (500 MHz, CDCl<sub>3</sub>) and <sup>13</sup>C NMR (126 MHz, CDCl<sub>3</sub>) spectra for **3b**:**

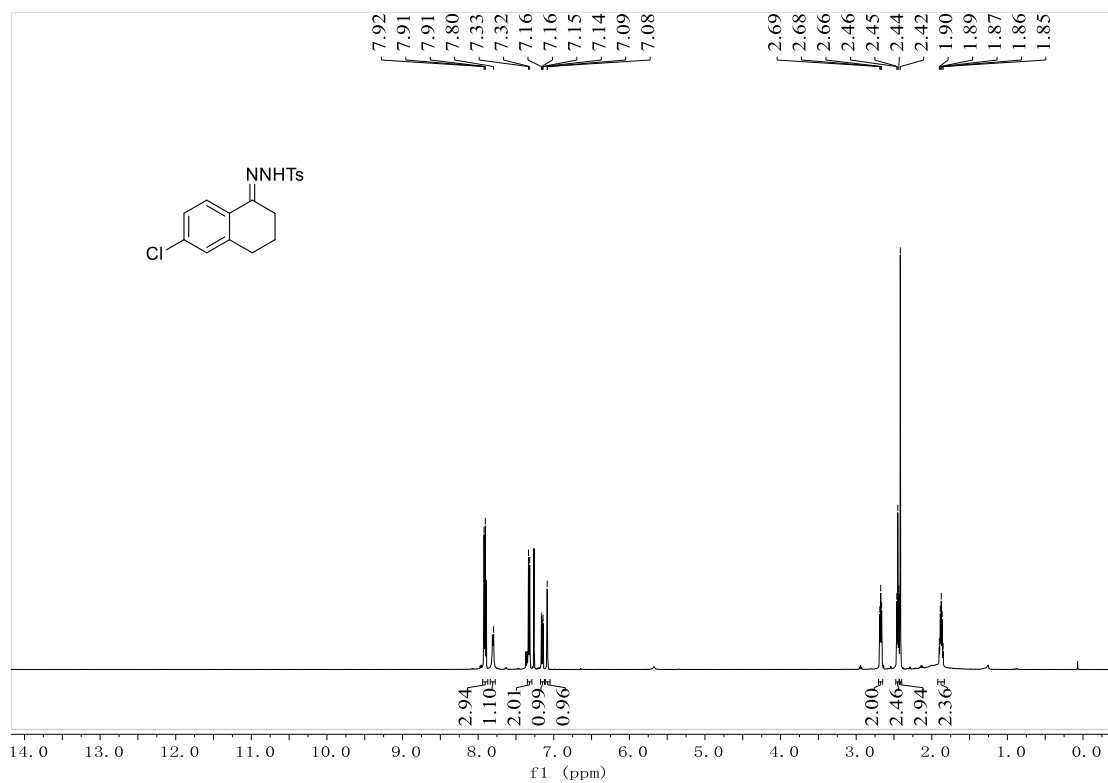

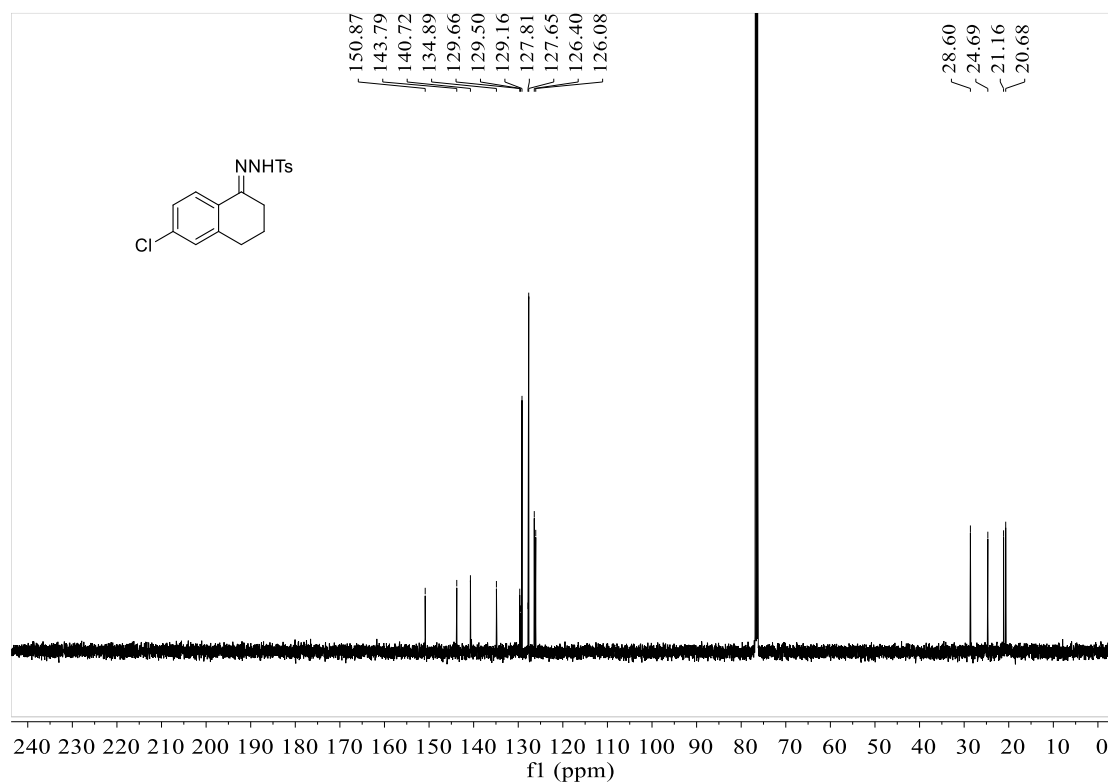

**<sup>1</sup>H NMR (500 MHz, DMSO-*d*<sub>6</sub>) spectra for 4b:**

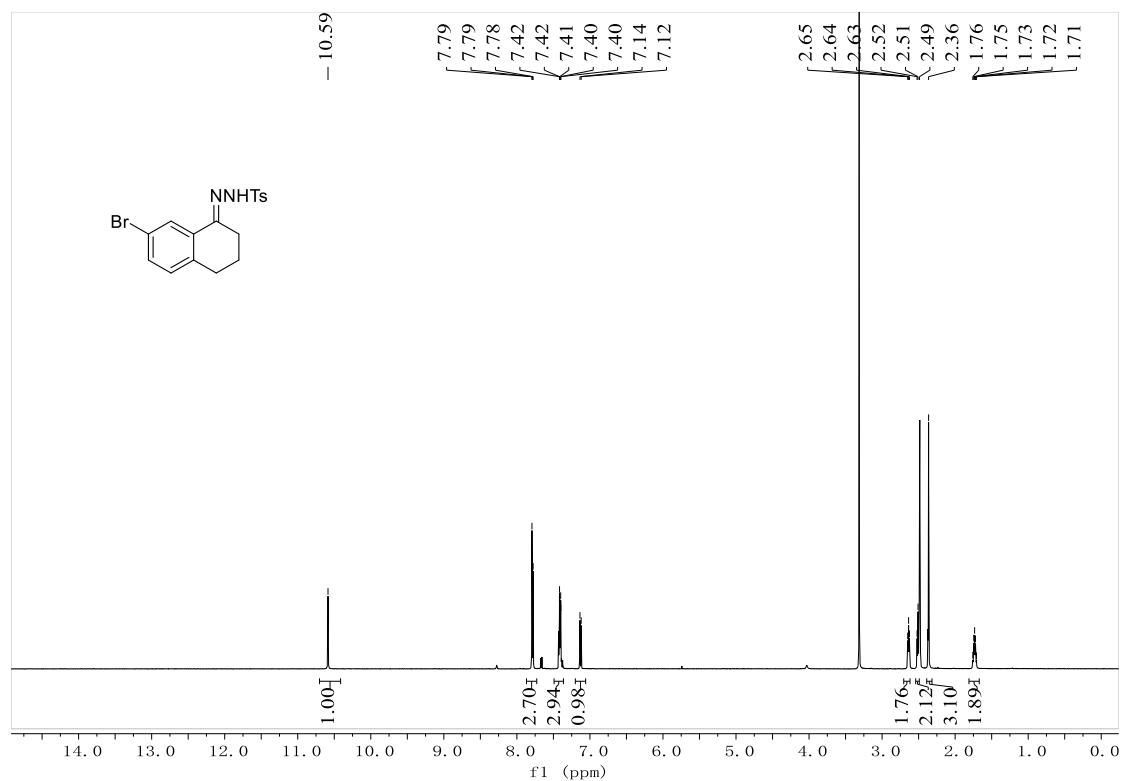

**<sup>1</sup>H NMR (500 MHz, CDCl<sub>3</sub>) and <sup>13</sup>C NMR (126 MHz, CDCl<sub>3</sub>) spectra for **5b**:**

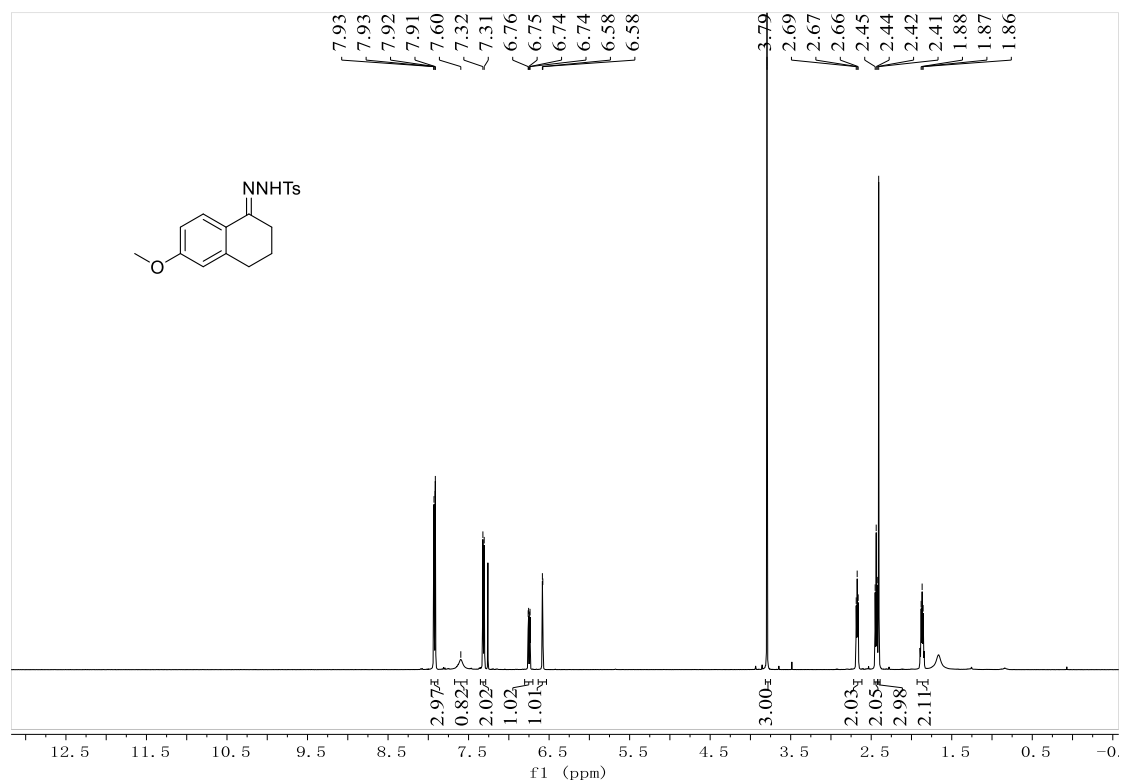

**<sup>1</sup>H NMR (500 MHz, CDCl<sub>3</sub>) spectra for **6b**:**

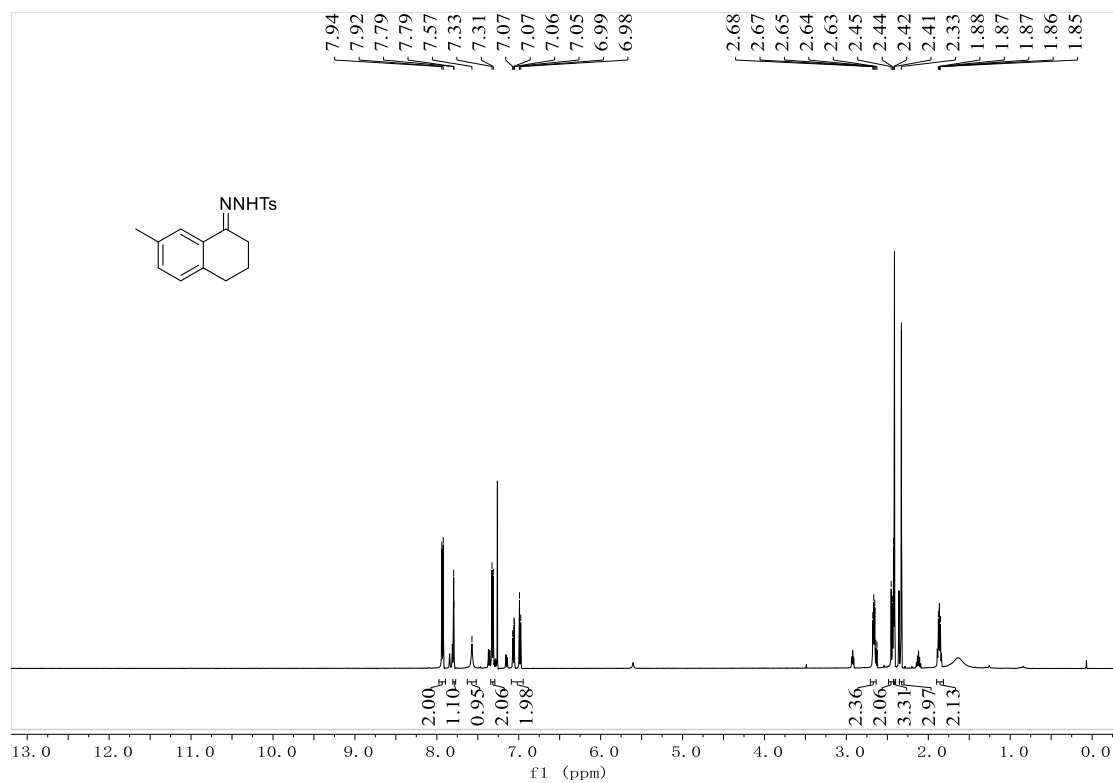

**<sup>1</sup>H NMR (500 MHz, DMSO-*d*<sub>6</sub>) and <sup>13</sup>C NMR (126 MHz, DMSO-*d*<sub>6</sub>) spectra for **7b**:**

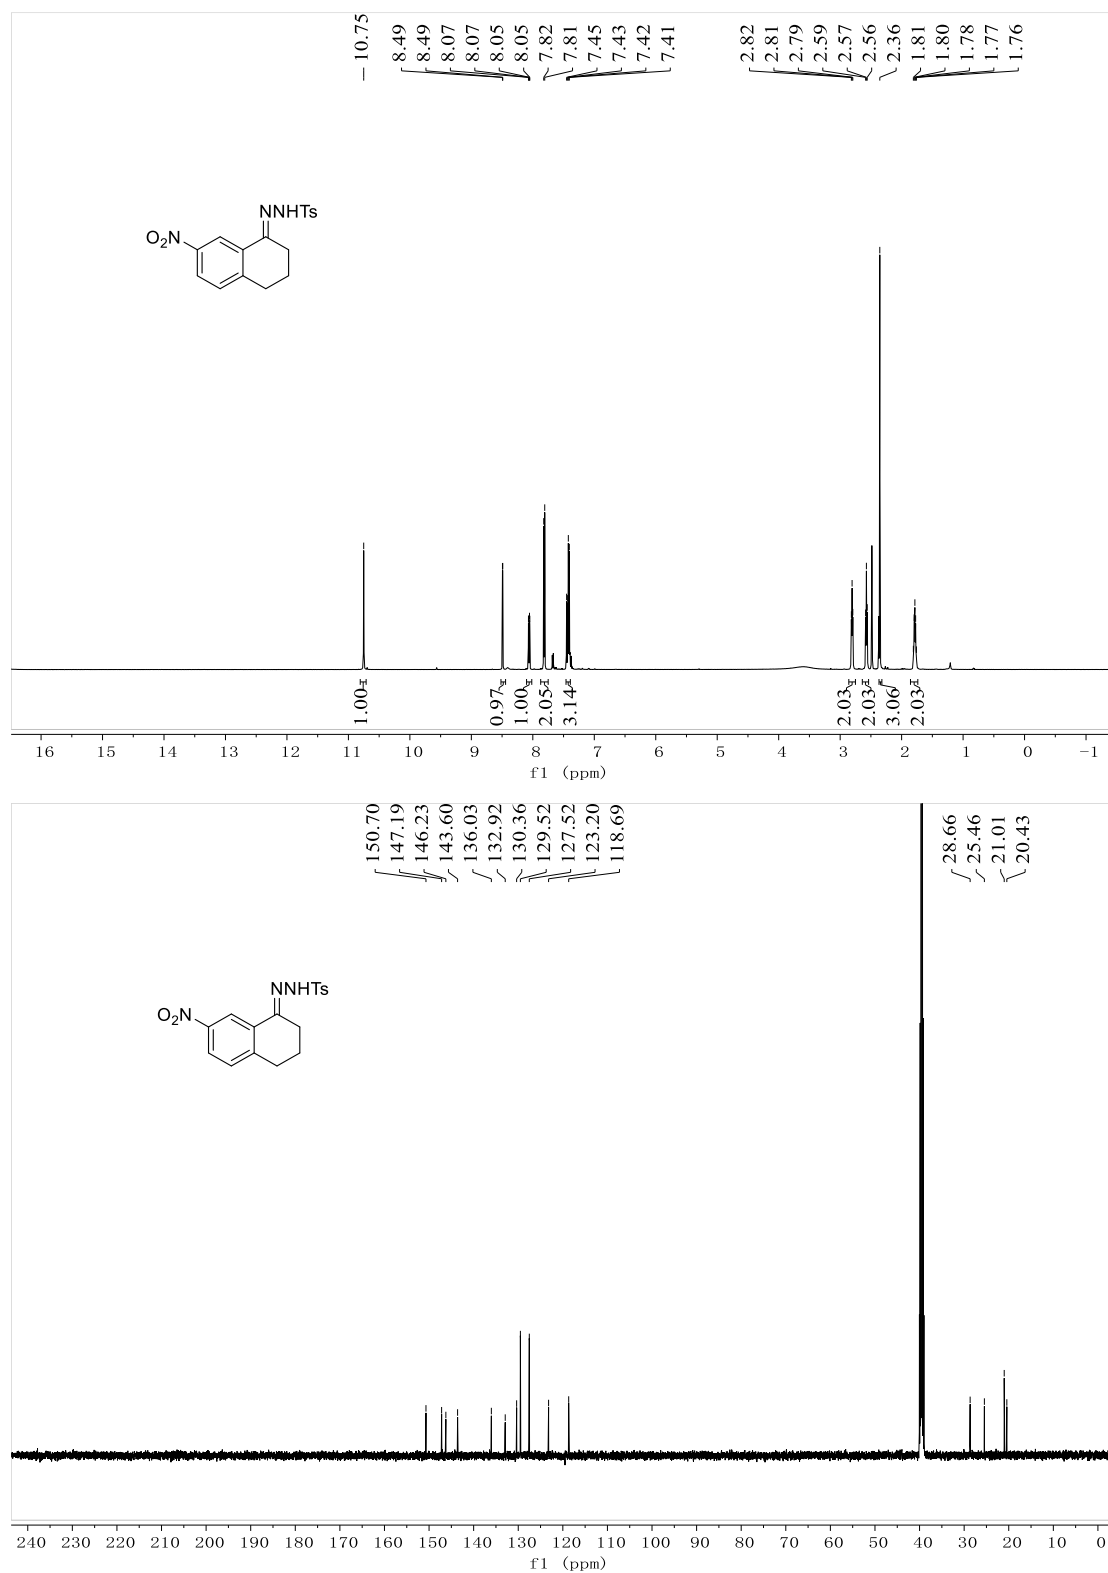

**<sup>1</sup>H NMR (500 MHz, CDCl<sub>3</sub>) spectra for **8b**:**

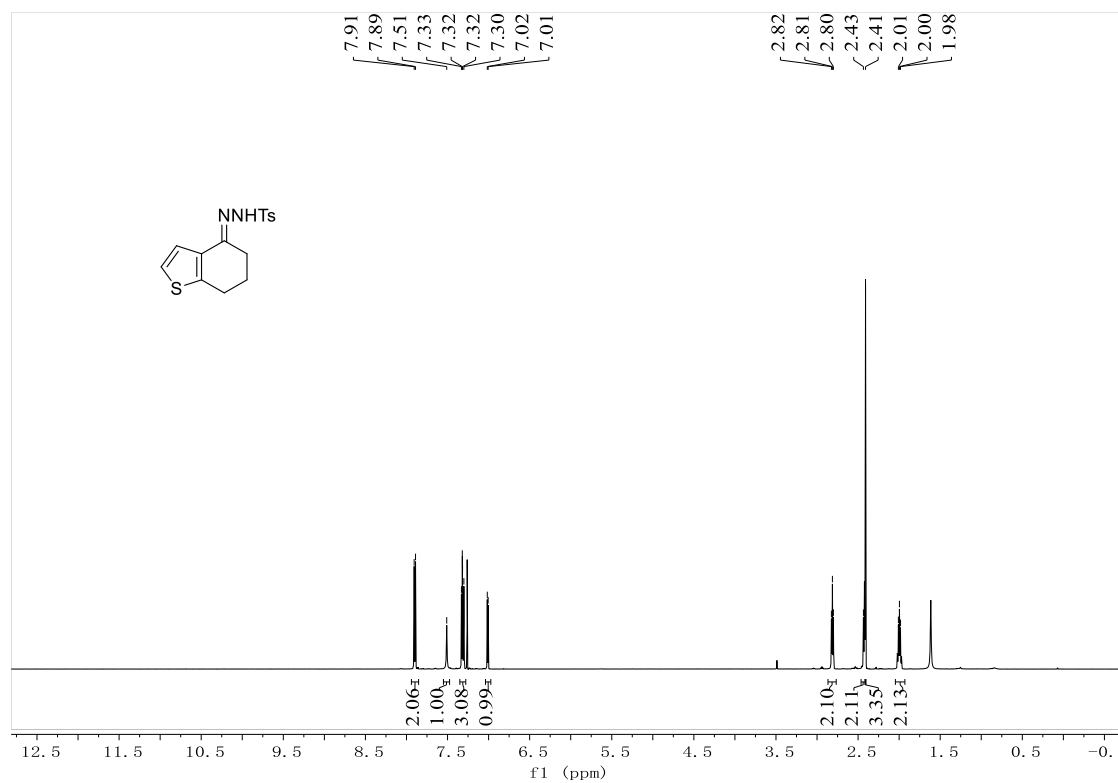

**<sup>1</sup>H NMR (500 MHz, CDCl<sub>3</sub>) and <sup>13</sup>C NMR (126 MHz, CDCl<sub>3</sub>) spectra for **9b**:**

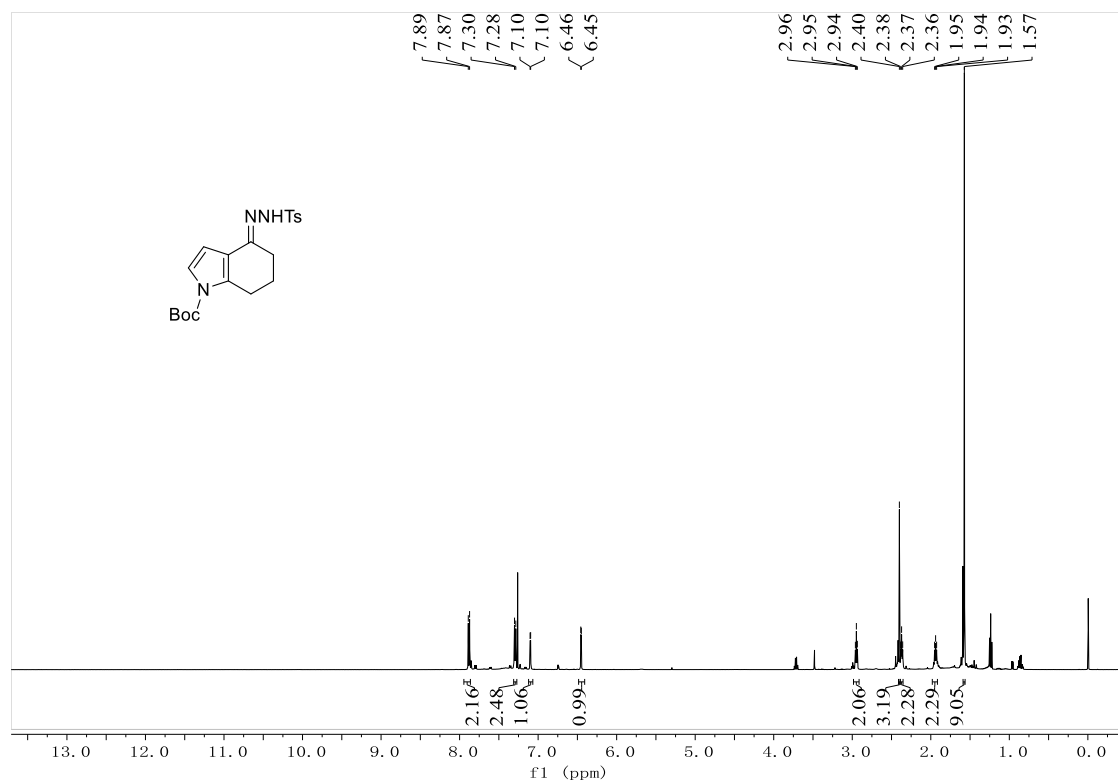

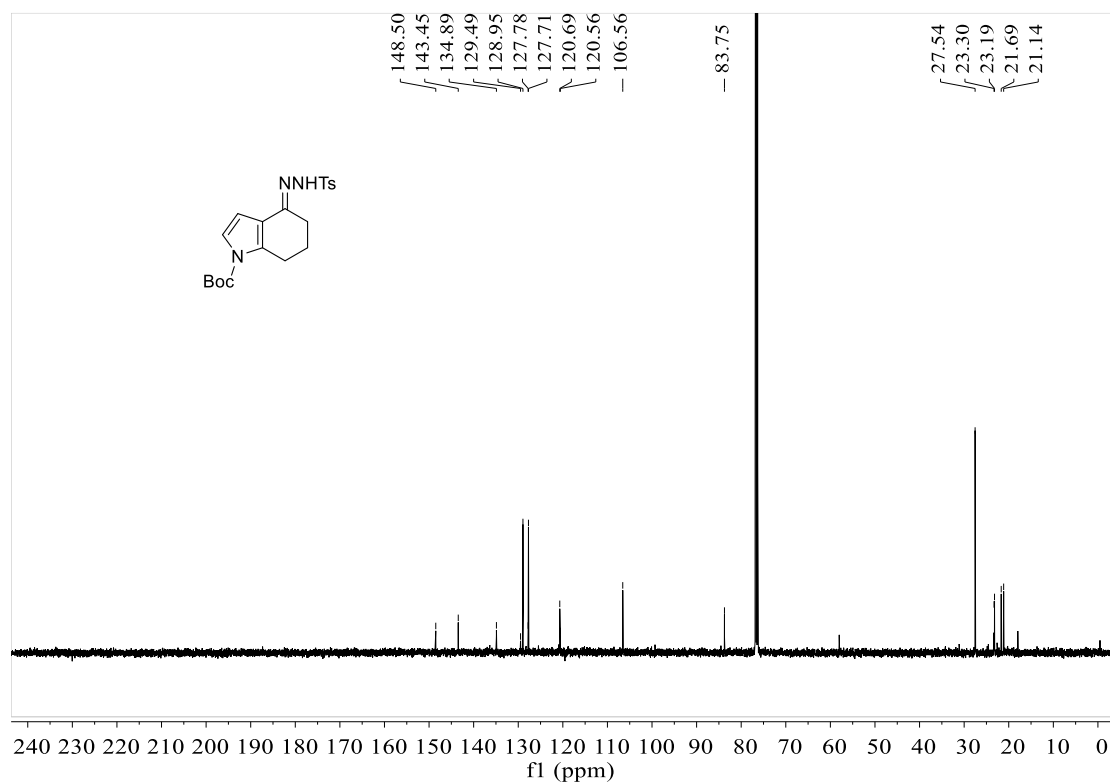

**<sup>1</sup>H NMR (500 MHz, DMSO-*d*<sub>6</sub>) and <sup>13</sup>C NMR (126 MHz, DMSO-*d*<sub>6</sub>) spectra for **10b**:**

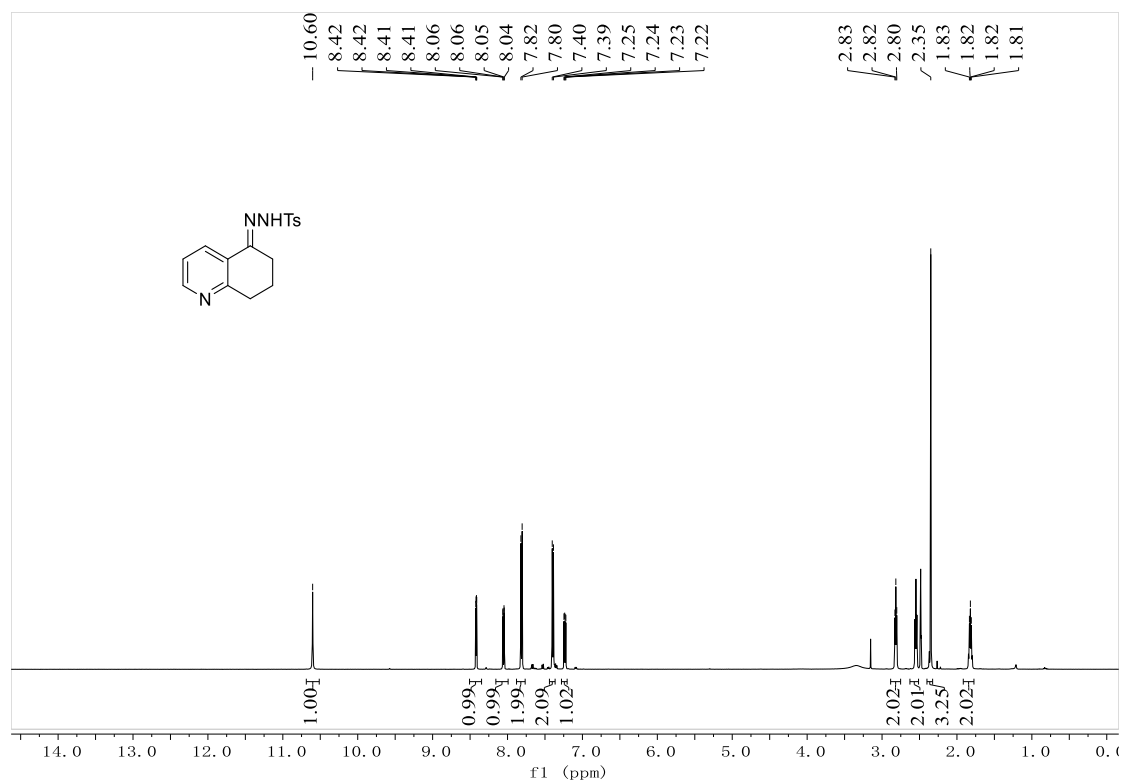

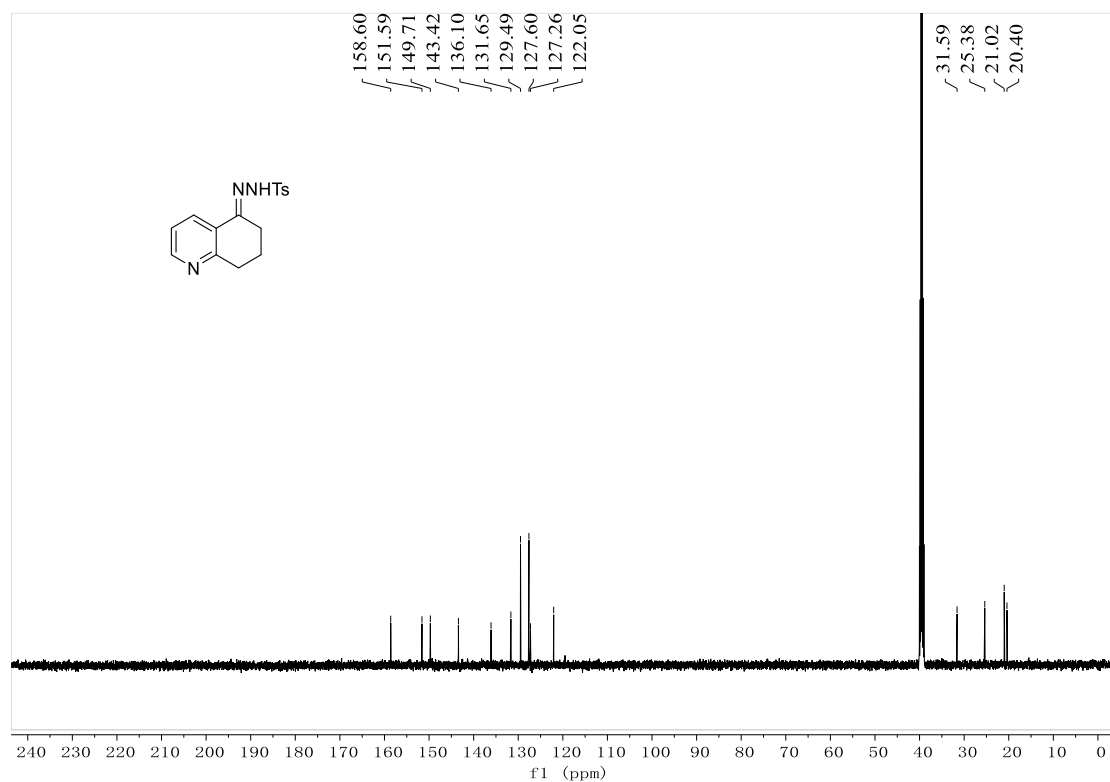

<sup>1</sup>H NMR (500 MHz, CDCl<sub>3</sub>) and <sup>13</sup>C NMR (126 MHz, CDCl<sub>3</sub>) spectra for **11b**:

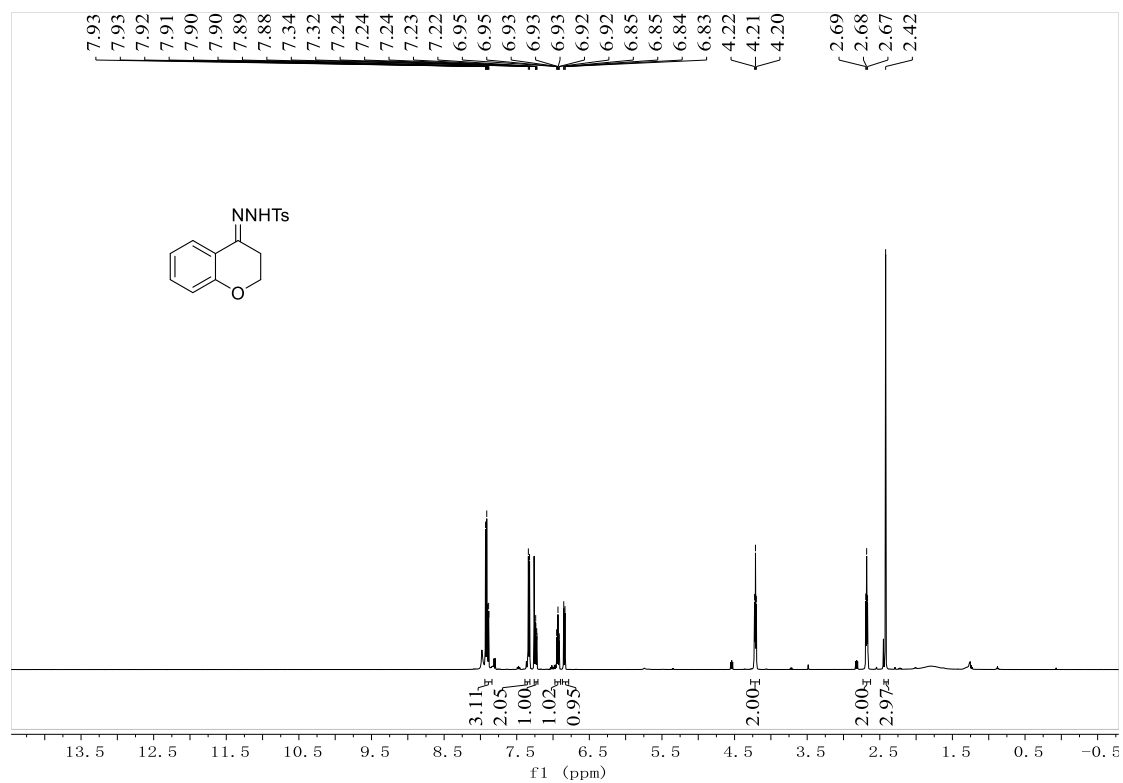

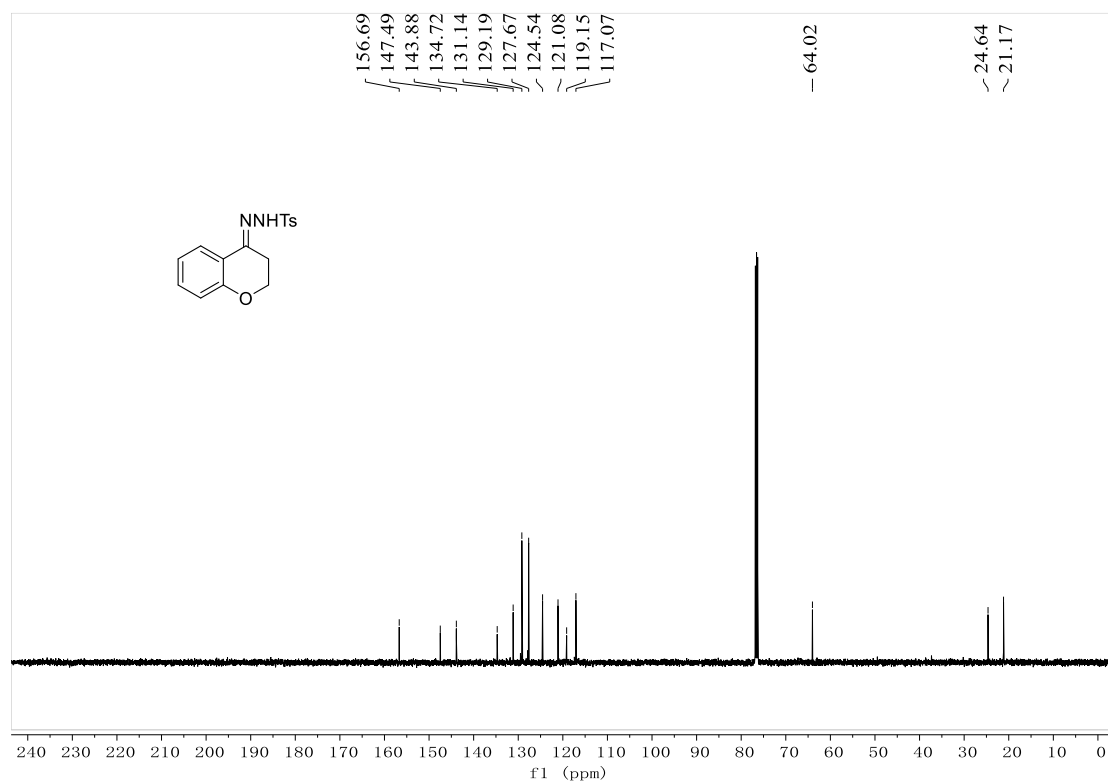

**<sup>1</sup>H NMR (500 MHz, CDCl<sub>3</sub>) spectra for **12b**:**

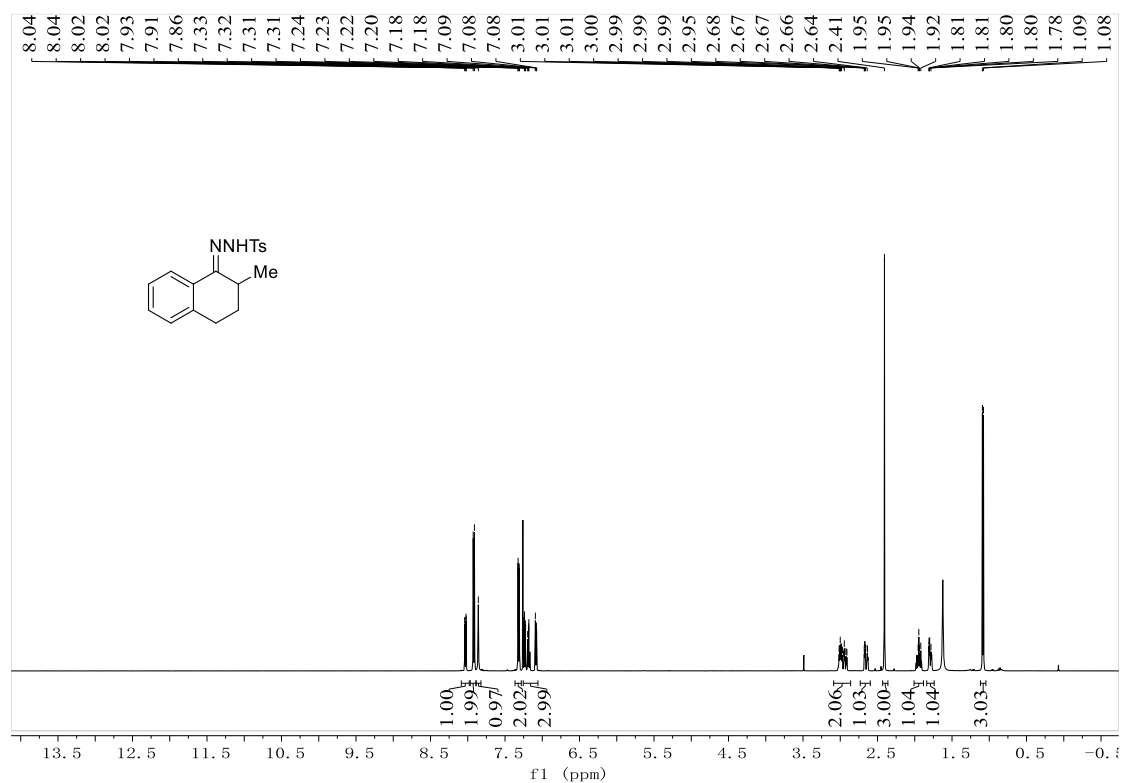



<sup>1</sup>H NMR (500 MHz, CDCl<sub>3</sub>) and <sup>13</sup>C NMR (126 MHz, CDCl<sub>3</sub>) spectra for **13b**:

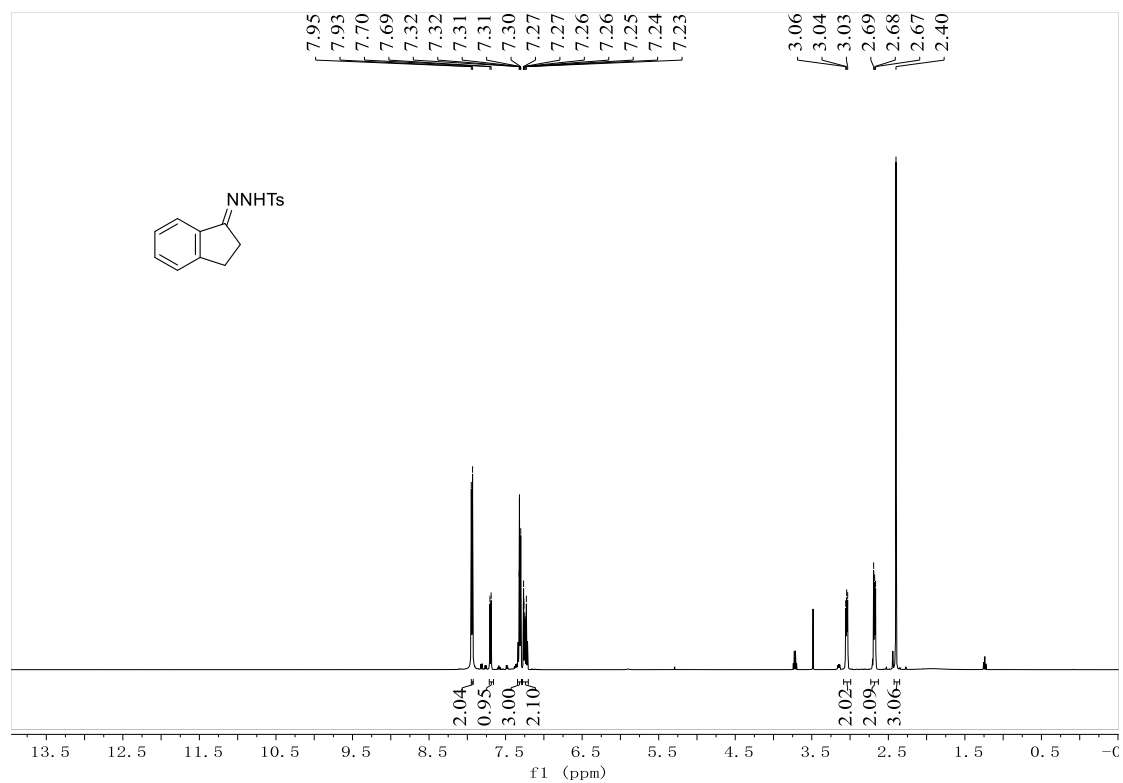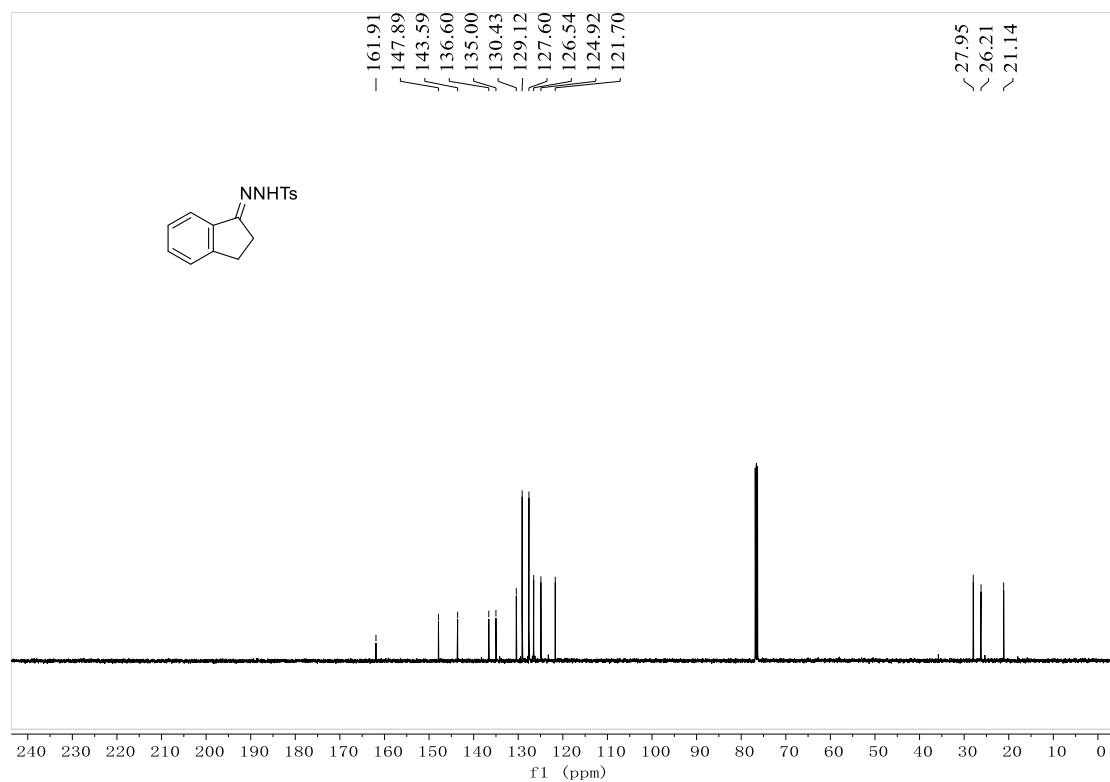

<sup>1</sup>H NMR (500 MHz, DMSO-*d*<sub>6</sub>) spectra for **14b**:

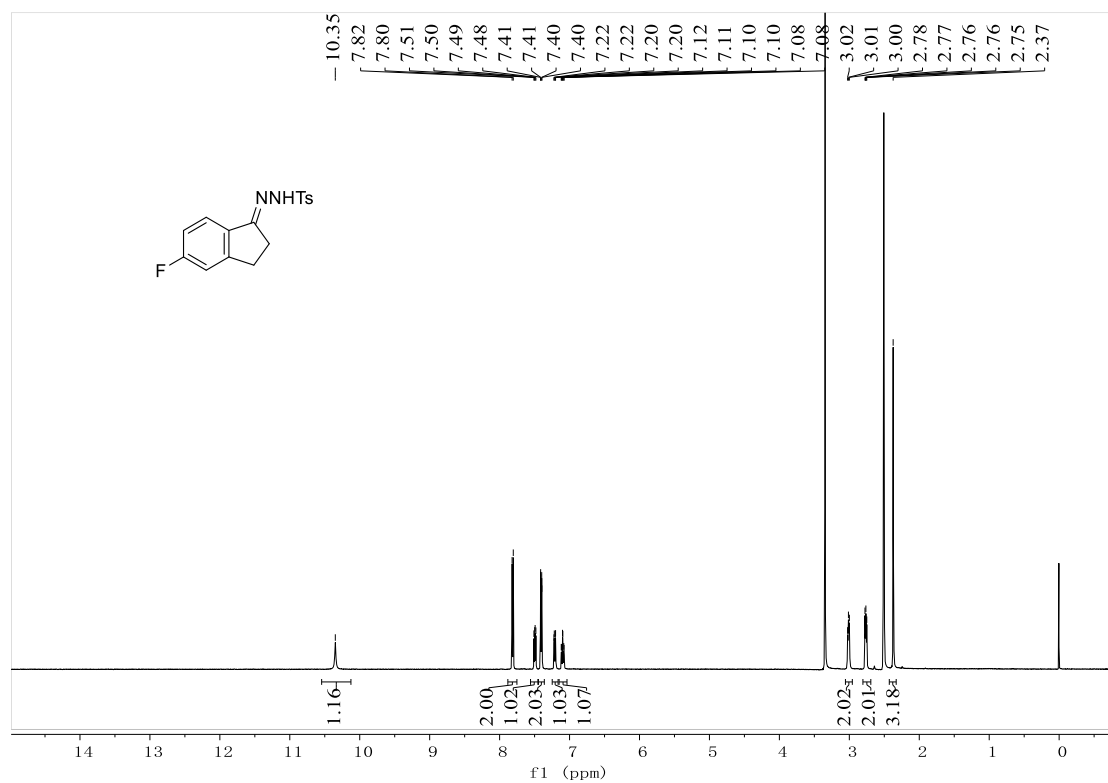

<sup>1</sup>H NMR (500 MHz, CDCl<sub>3</sub>) spectra for **15b**:

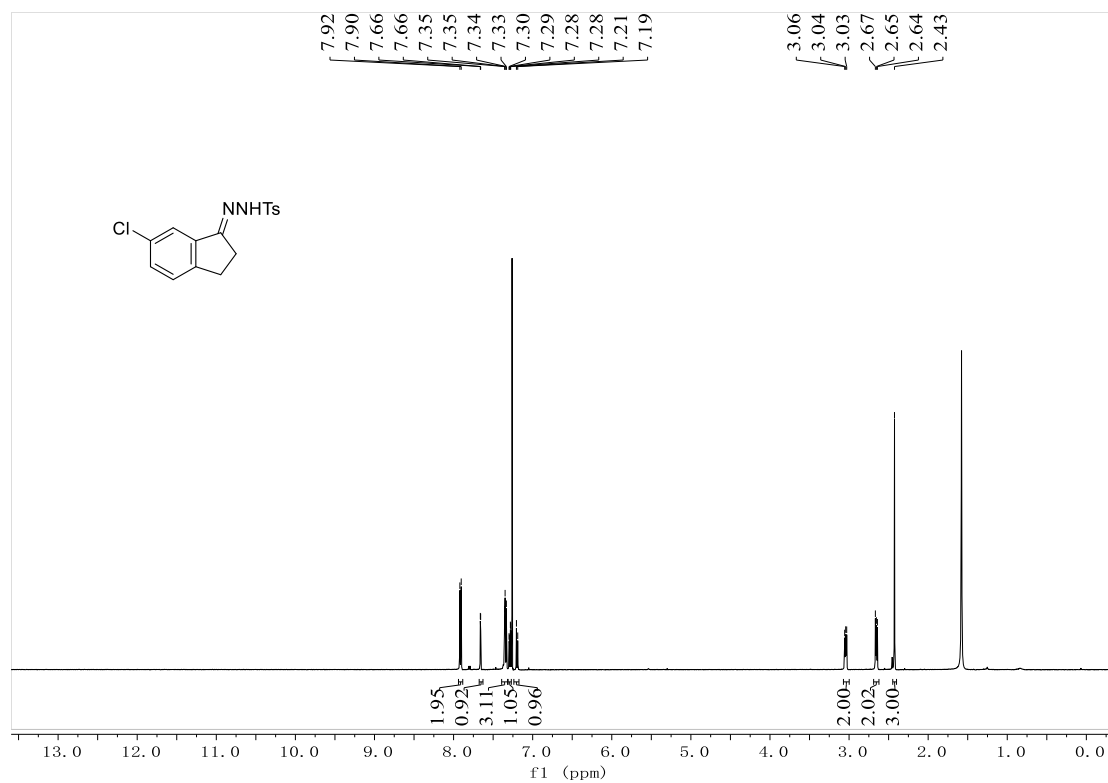

**<sup>1</sup>H NMR (500 MHz, CDCl<sub>3</sub>) spectra for 16b:**

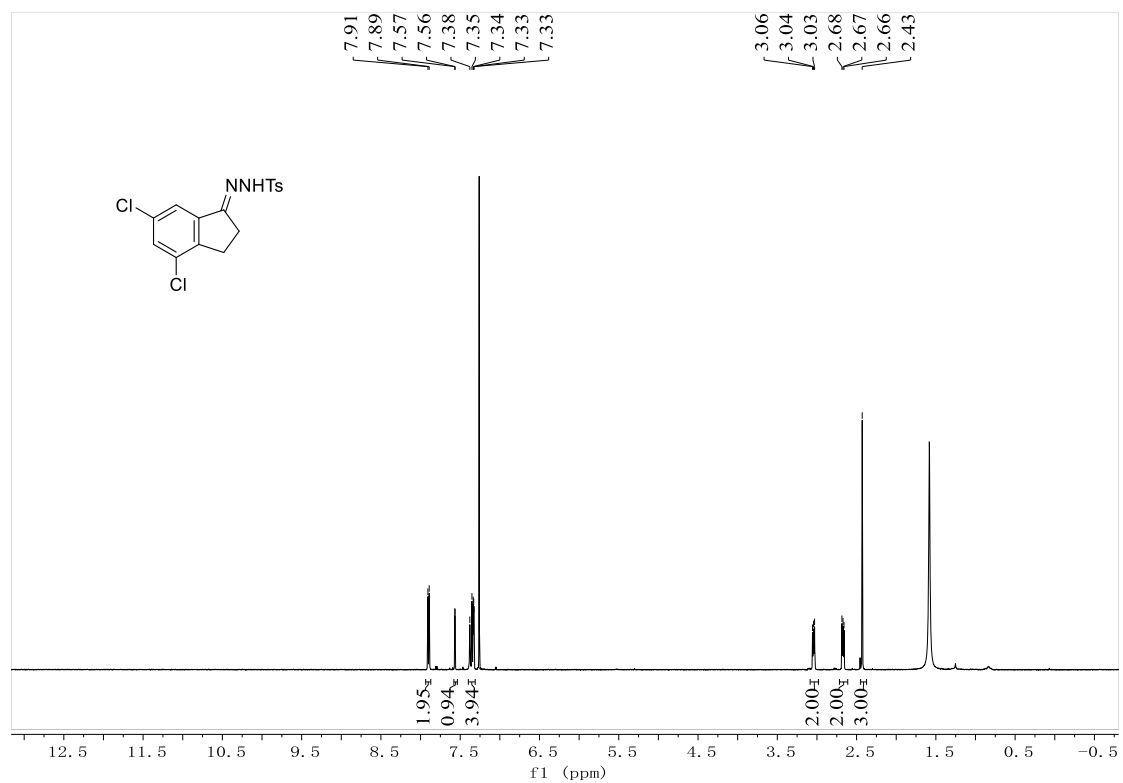

**<sup>1</sup>H NMR (500 MHz, CDCl<sub>3</sub>) spectra for 17b:**

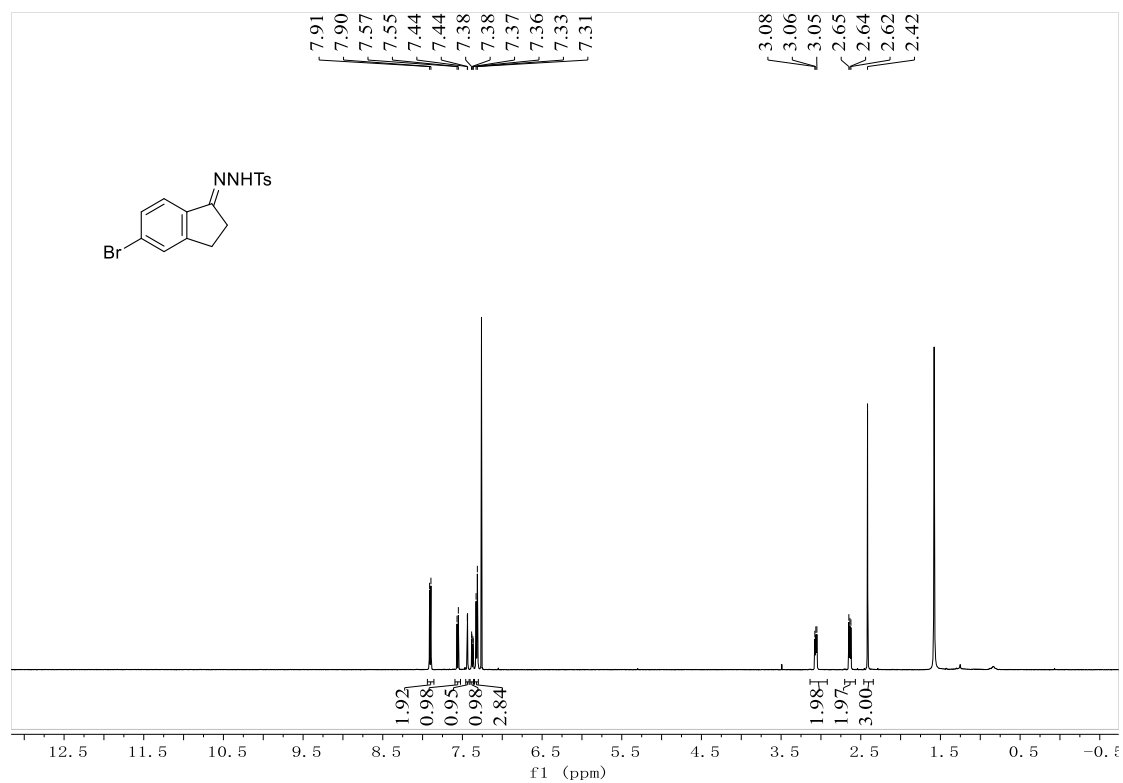

**<sup>1</sup>H NMR (500 MHz, DMSO-*d*<sub>6</sub>) spectra for **18b**:**

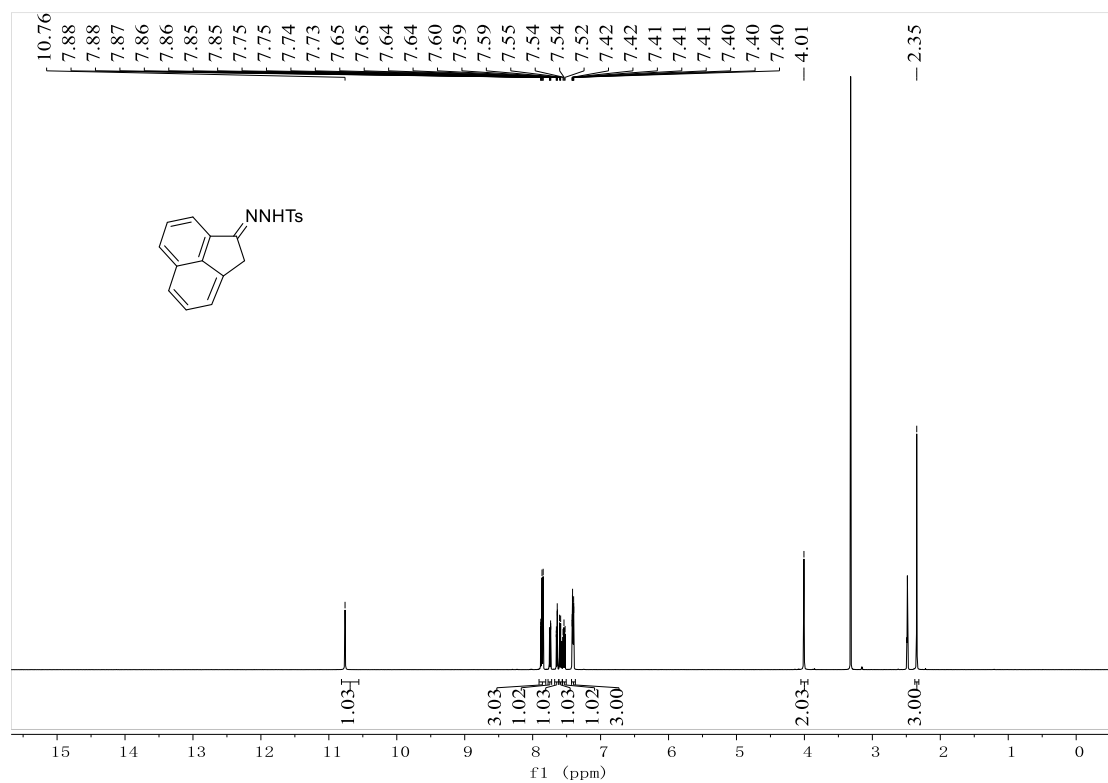

**<sup>1</sup>H NMR (500 MHz, DMSO-*d*<sub>6</sub>) and <sup>13</sup>C NMR (126 MHz, DMSO-*d*<sub>6</sub>) spectra for **19b**:**

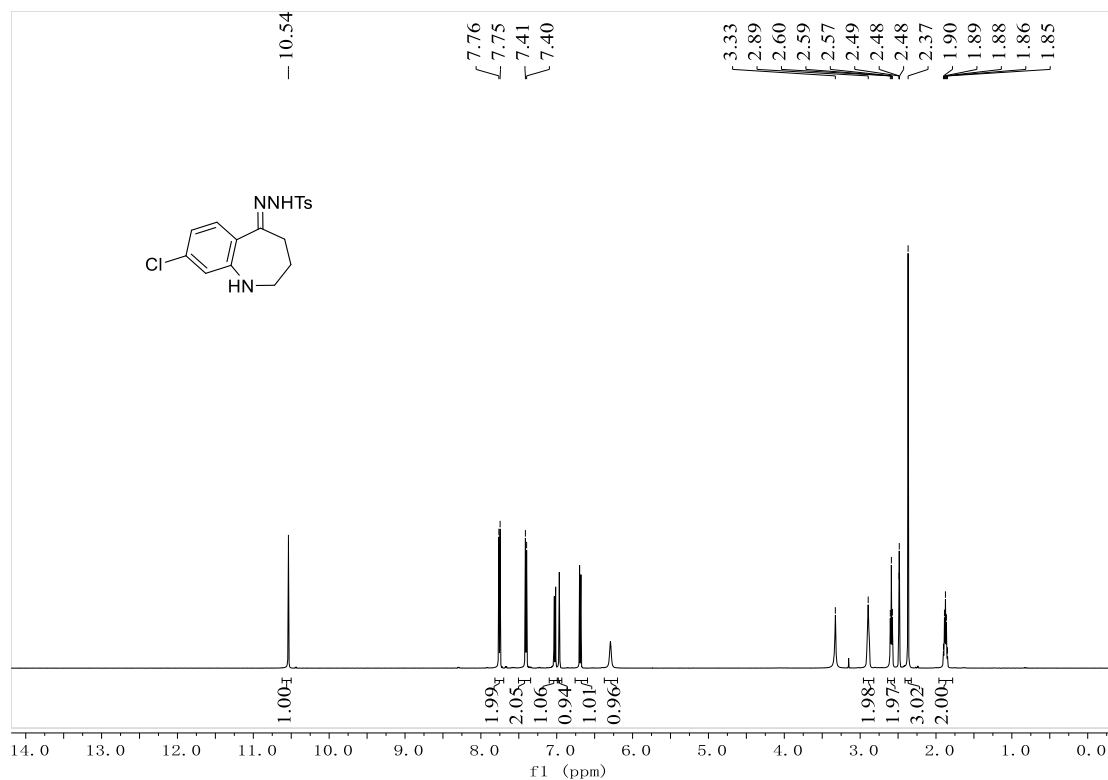

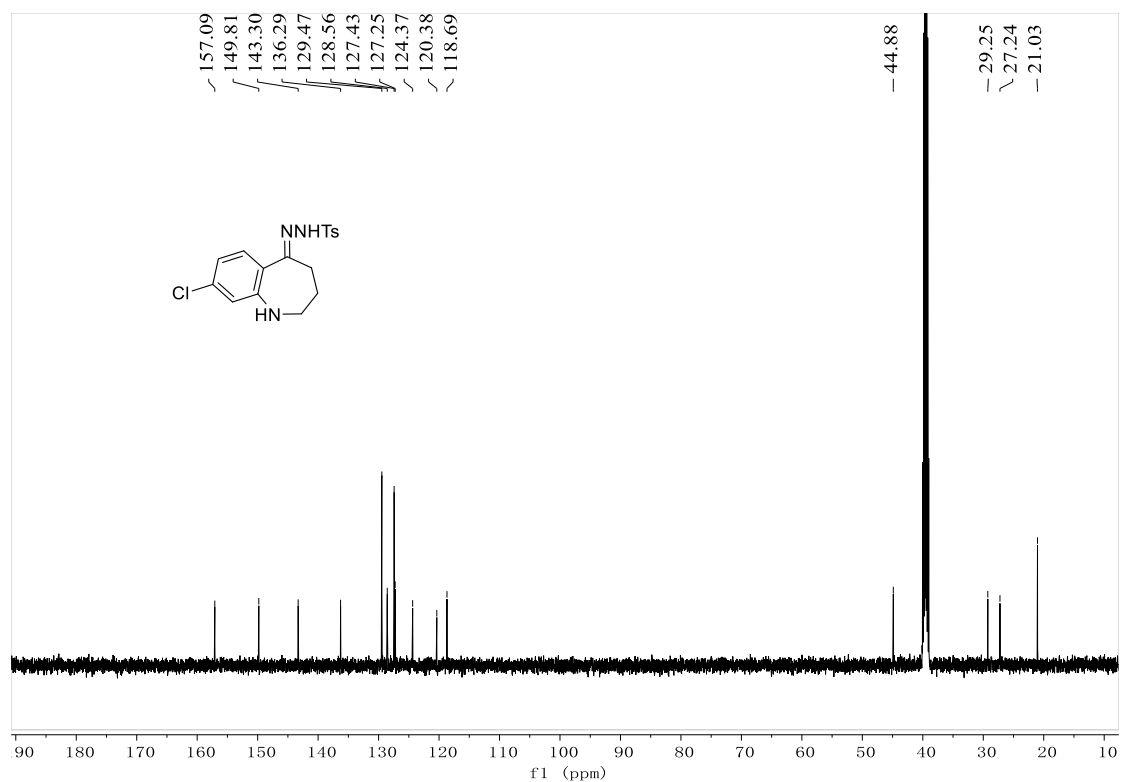

**<sup>1</sup>H NMR (500 MHz, CDCl<sub>3</sub>) spectra for **21b**:**

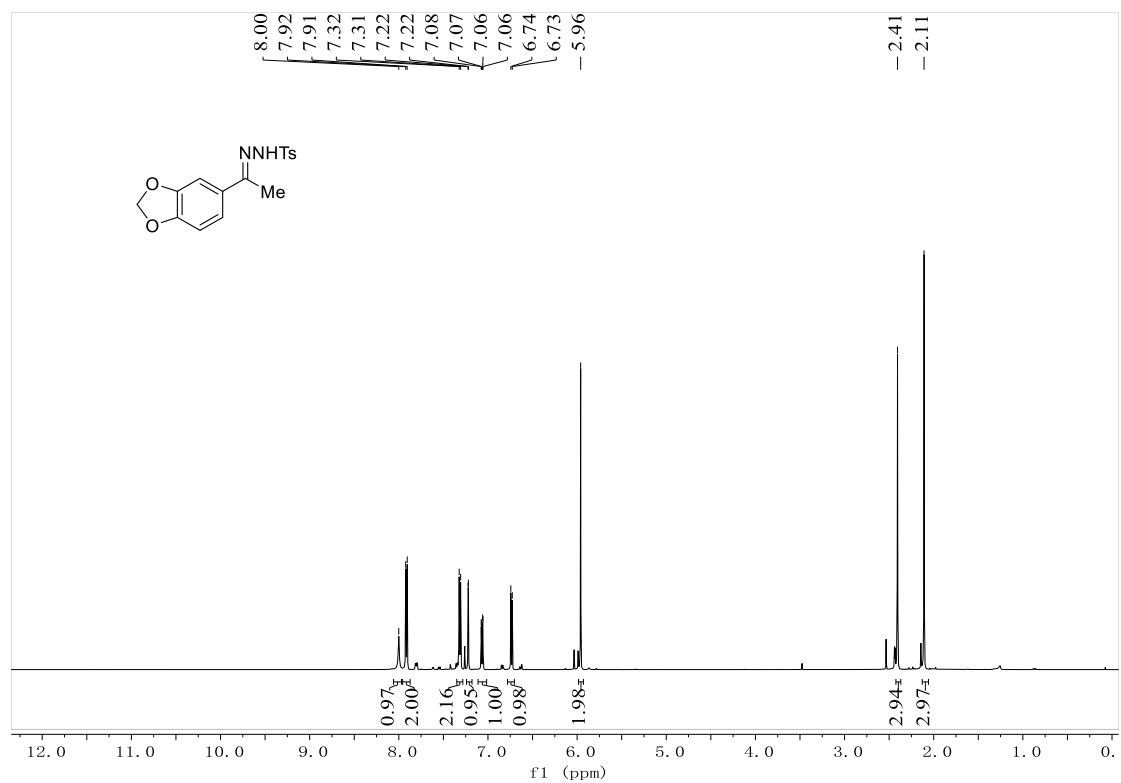

**<sup>1</sup>H NMR (500 MHz, CDCl<sub>3</sub>) and <sup>13</sup>C NMR (126 MHz, CDCl<sub>3</sub>) spectra for **22b**:**

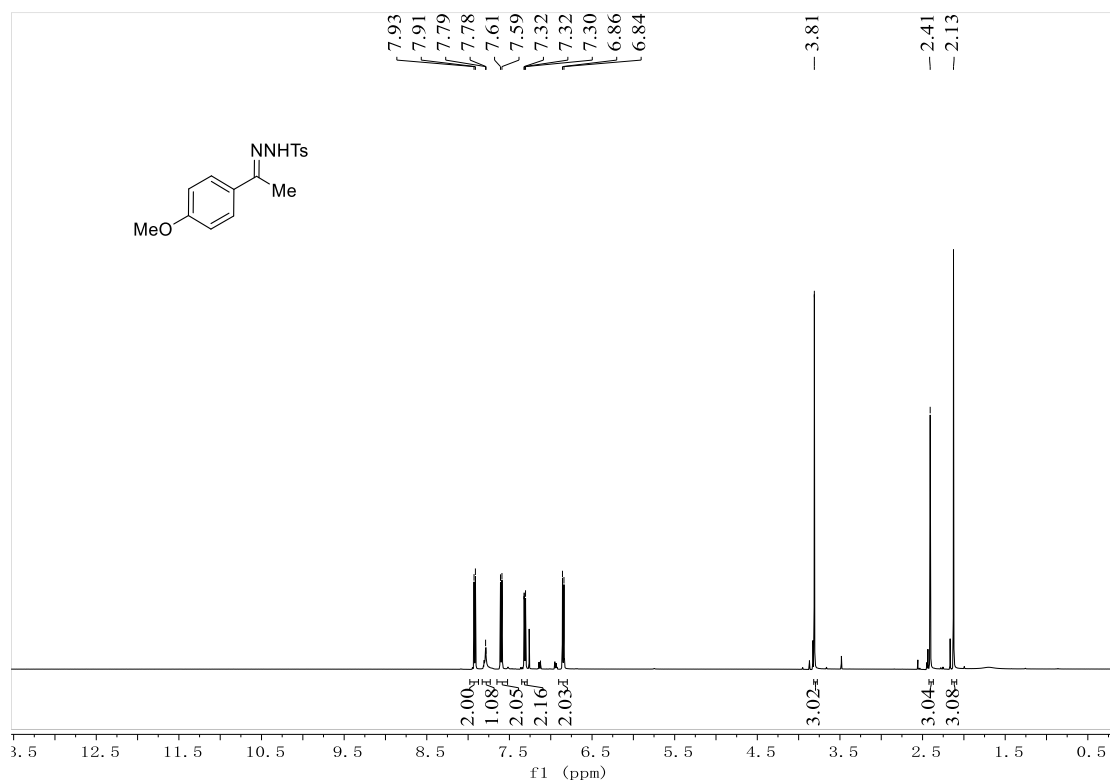

**<sup>1</sup>H NMR (500 MHz, CDCl<sub>3</sub>) and <sup>13</sup>C NMR (126 MHz, CDCl<sub>3</sub>) spectra for **24b**:**

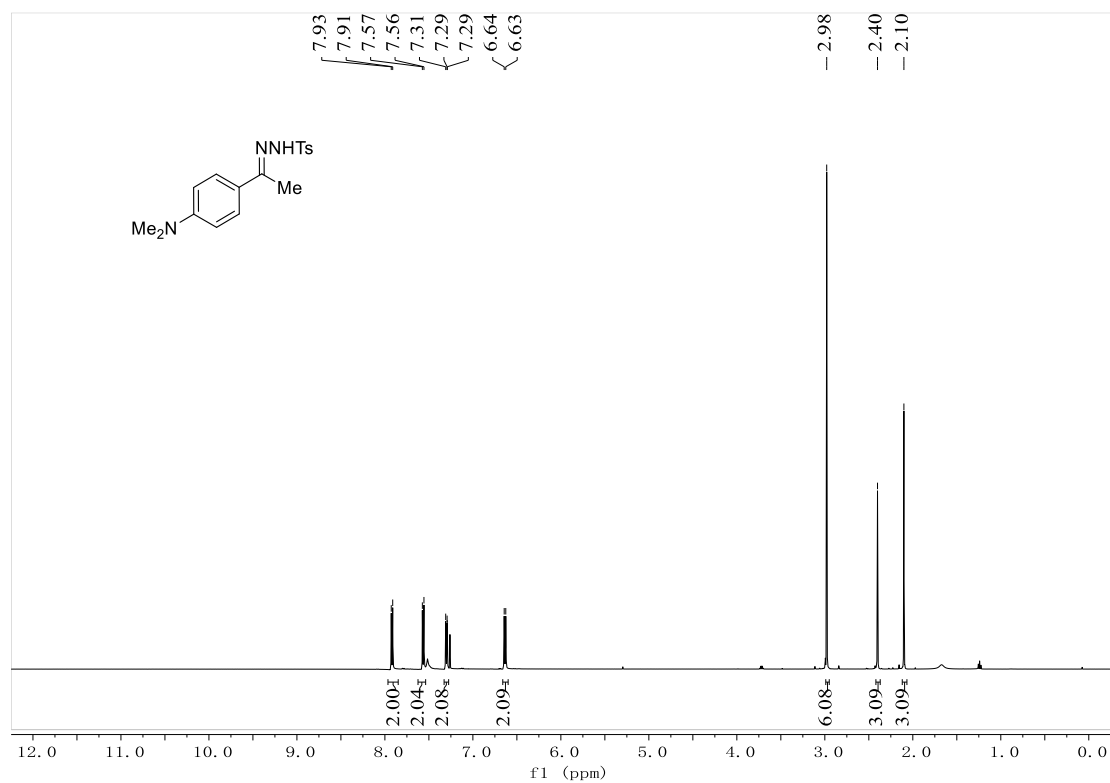

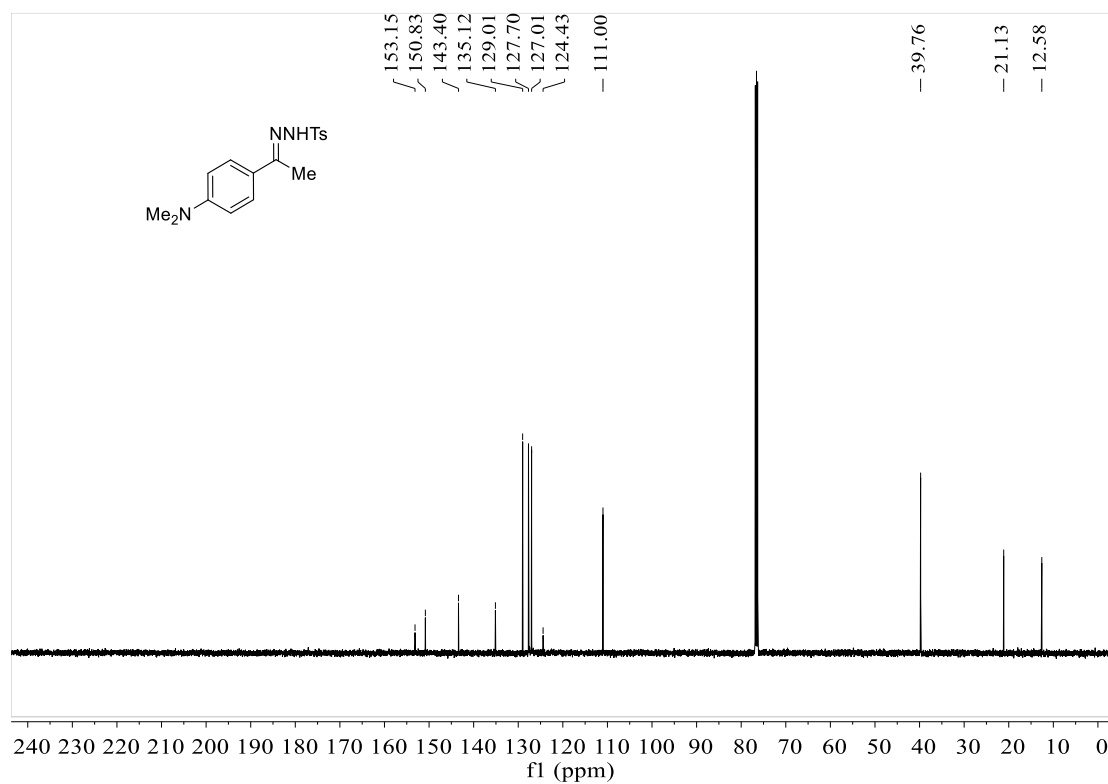

<sup>1</sup>H NMR (500 MHz, CDCl<sub>3</sub>) and <sup>13</sup>C NMR (126 MHz, CDCl<sub>3</sub>) spectra for **25b**:

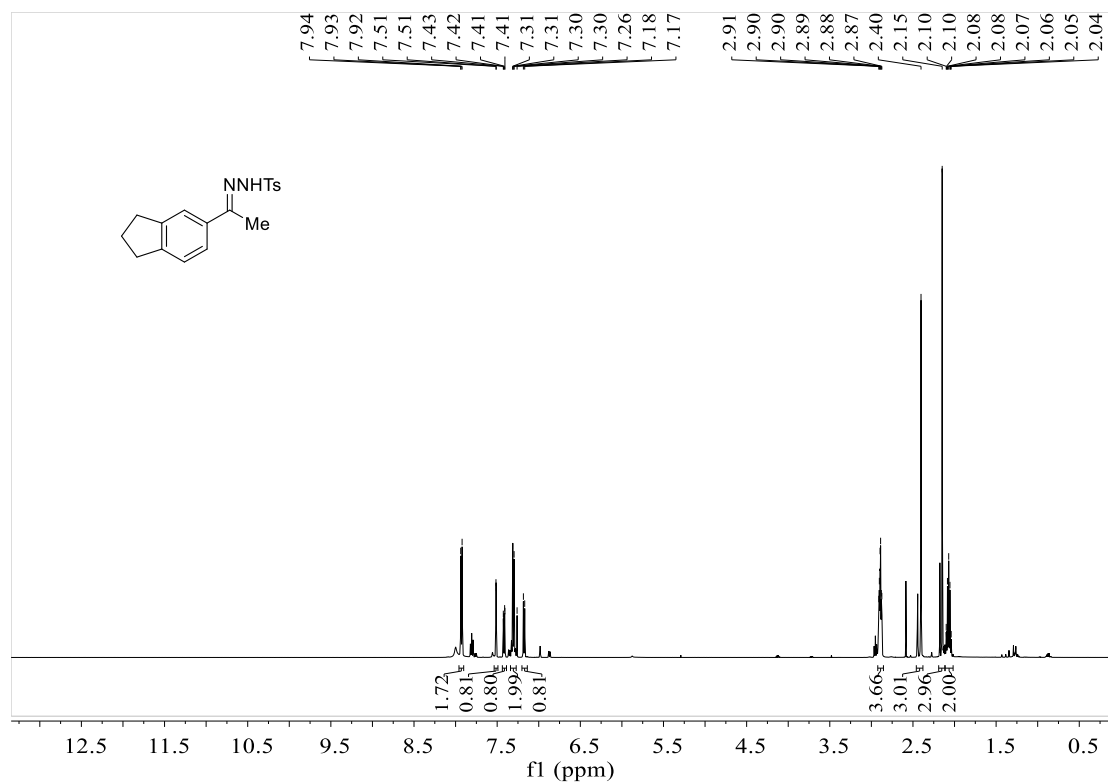

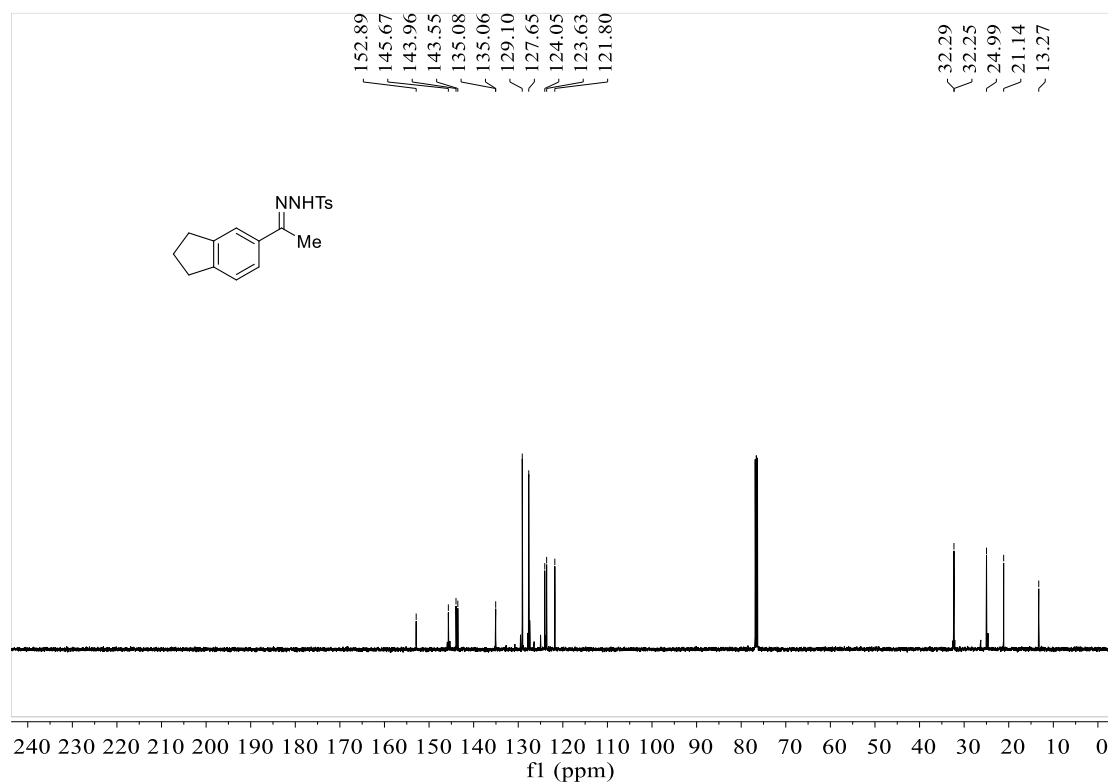

**<sup>1</sup>H NMR (500 MHz, DMSO-*d*<sub>6</sub>) spectra for 26b:**

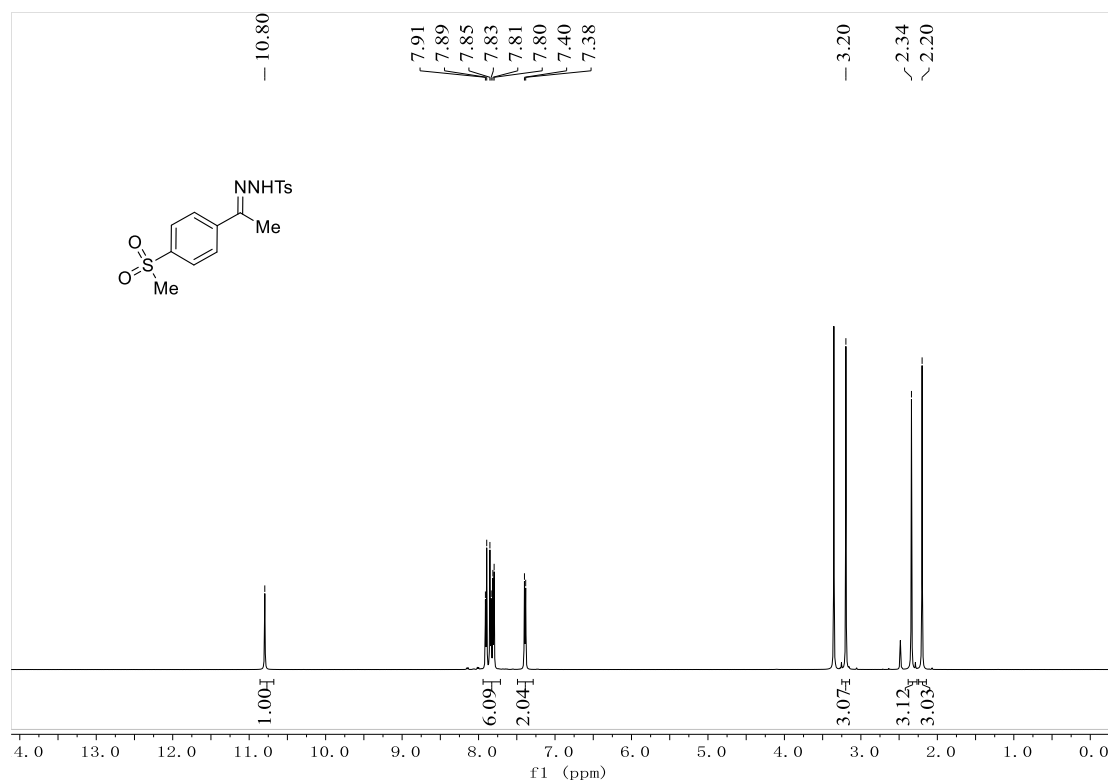



<sup>1</sup>H NMR (500 MHz, CDCl<sub>3</sub>) and <sup>13</sup>C NMR (126 MHz, CDCl<sub>3</sub>) spectra for **27b**:

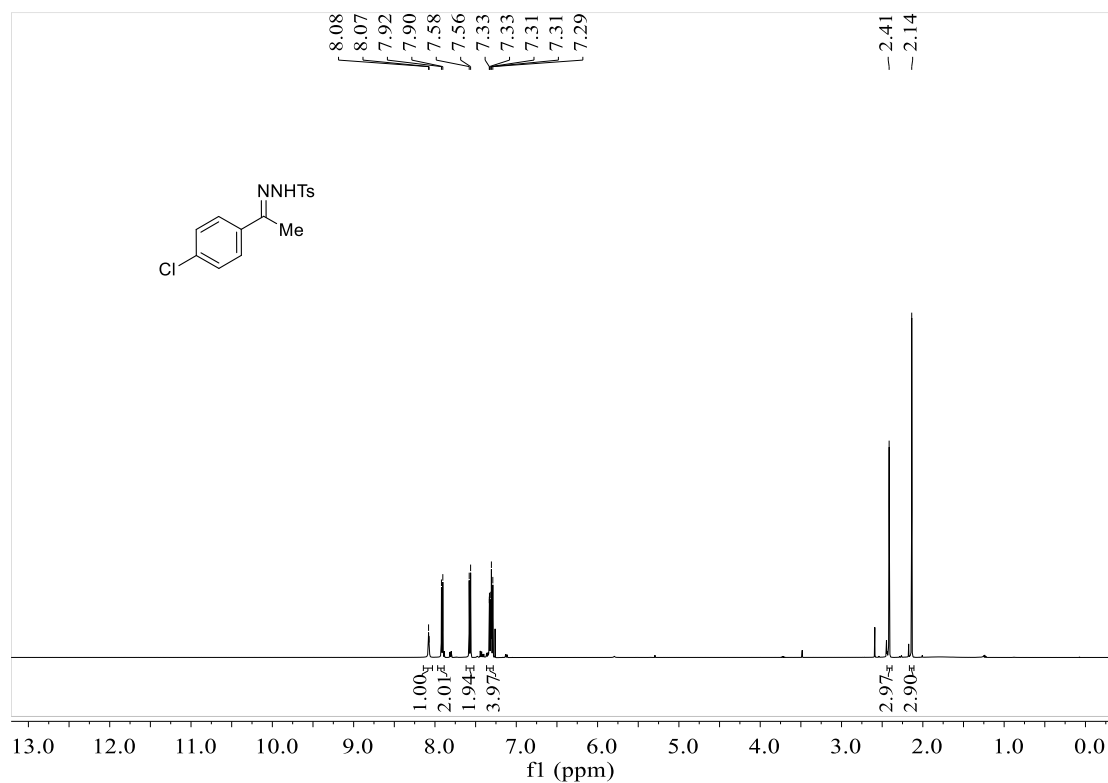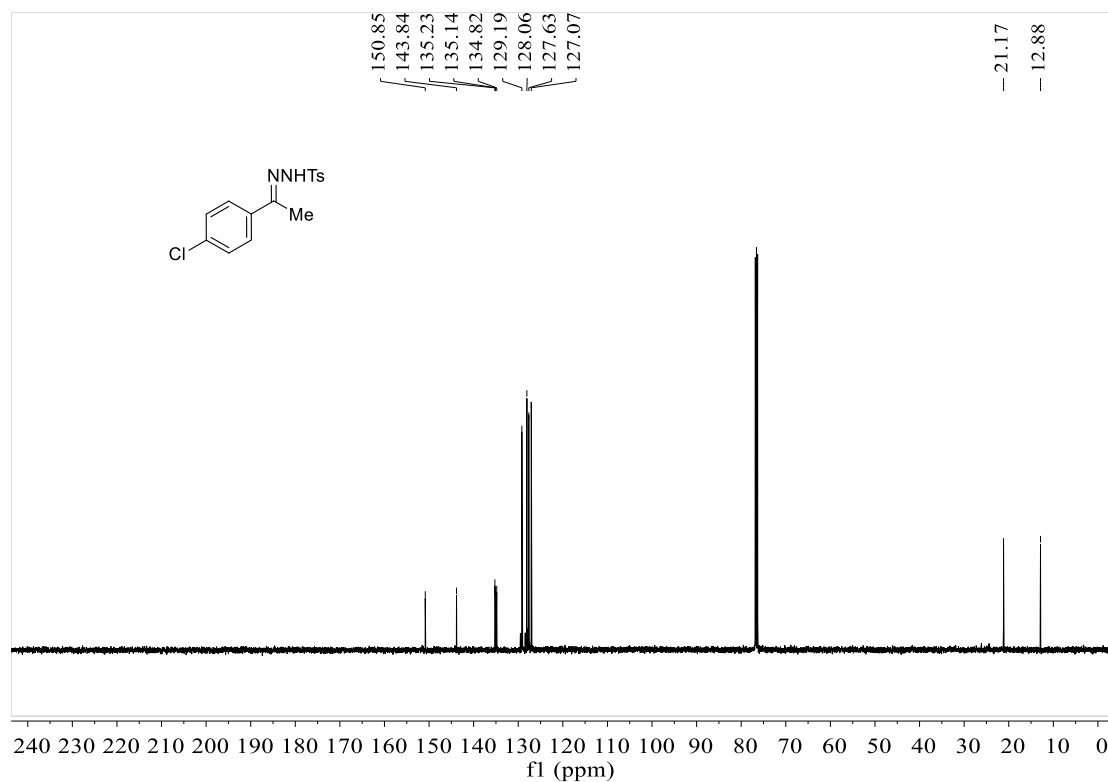

<sup>1</sup>H NMR (500 MHz, CDCl<sub>3</sub>) and <sup>13</sup>C NMR (126 MHz, CDCl<sub>3</sub>) spectra for **28b**:

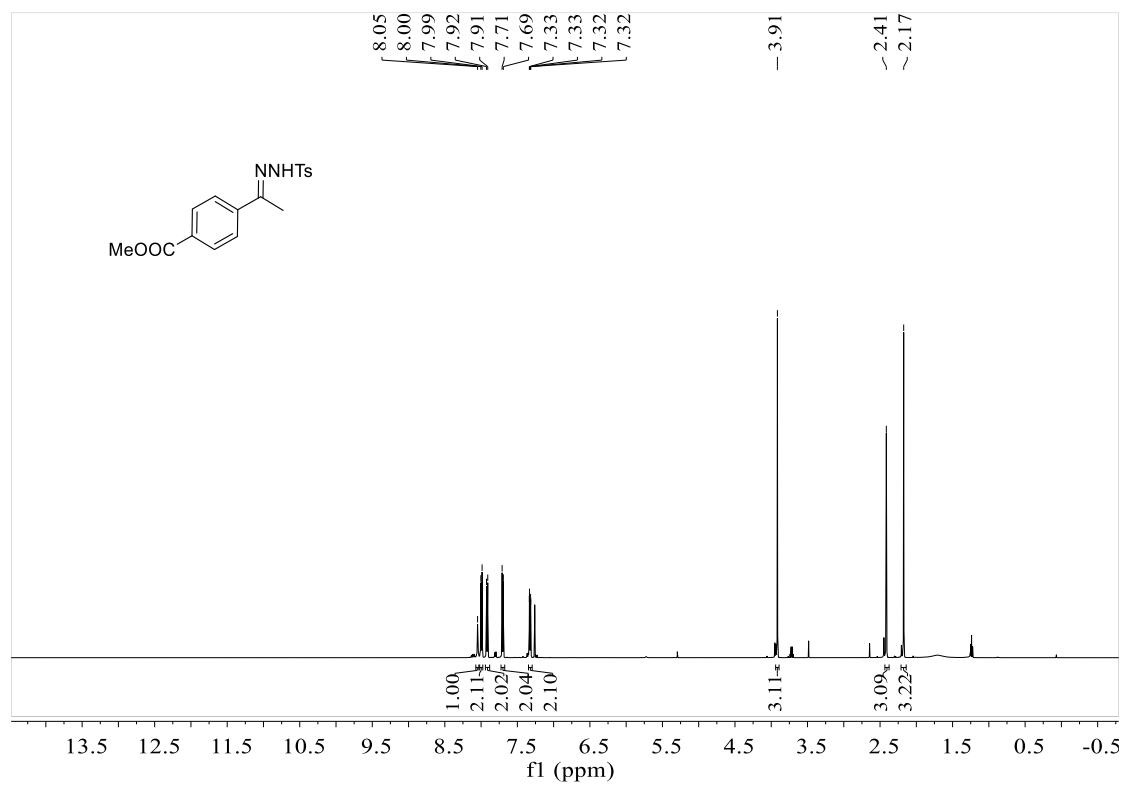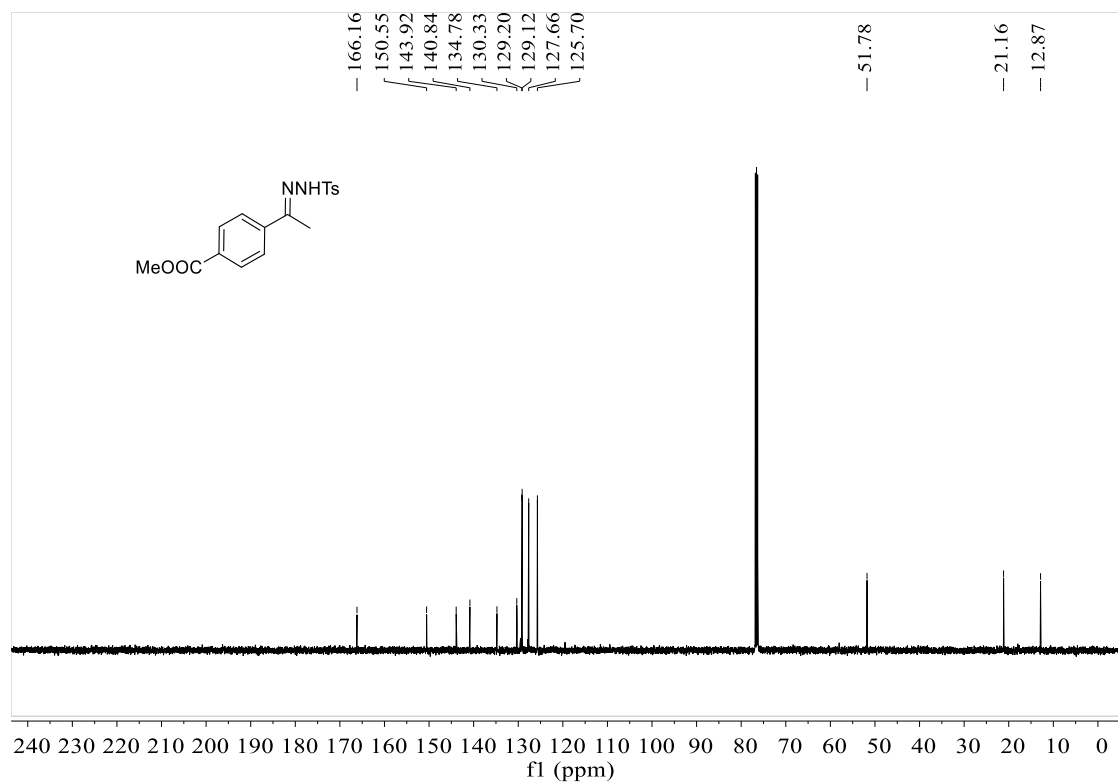

<sup>1</sup>H NMR (500 MHz, CDCl<sub>3</sub>) and <sup>13</sup>C NMR (126 MHz, CDCl<sub>3</sub>) spectra for **29b**:

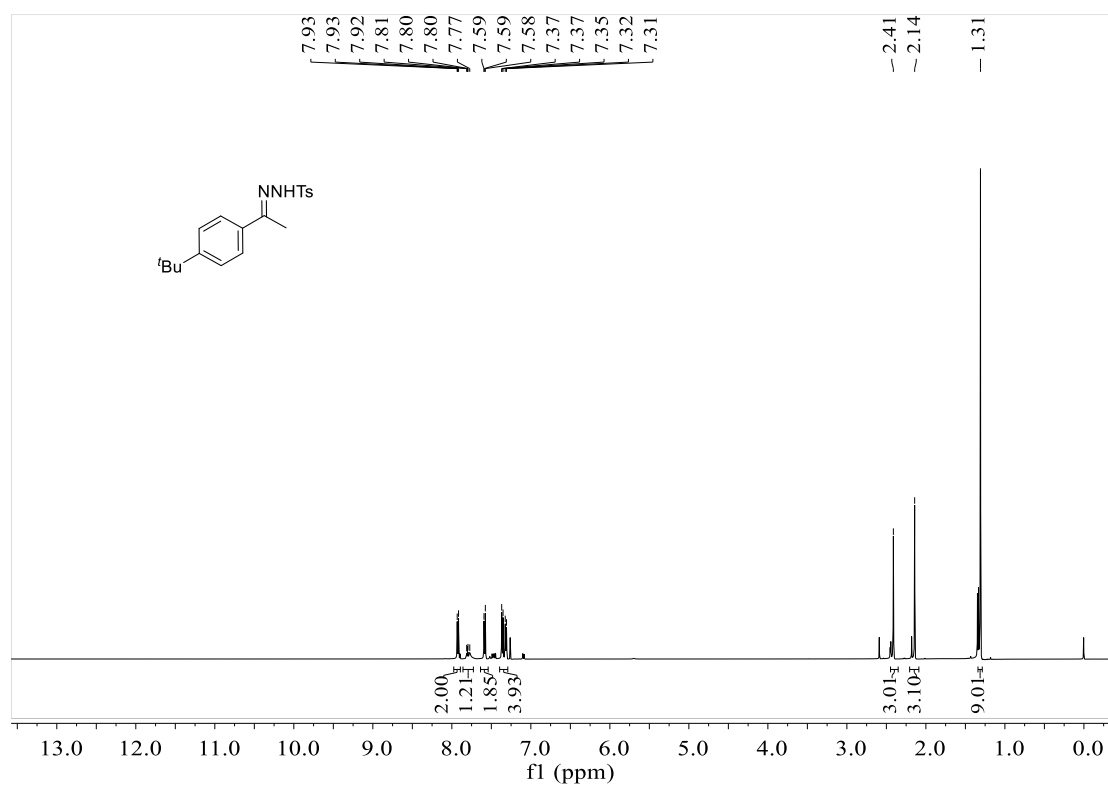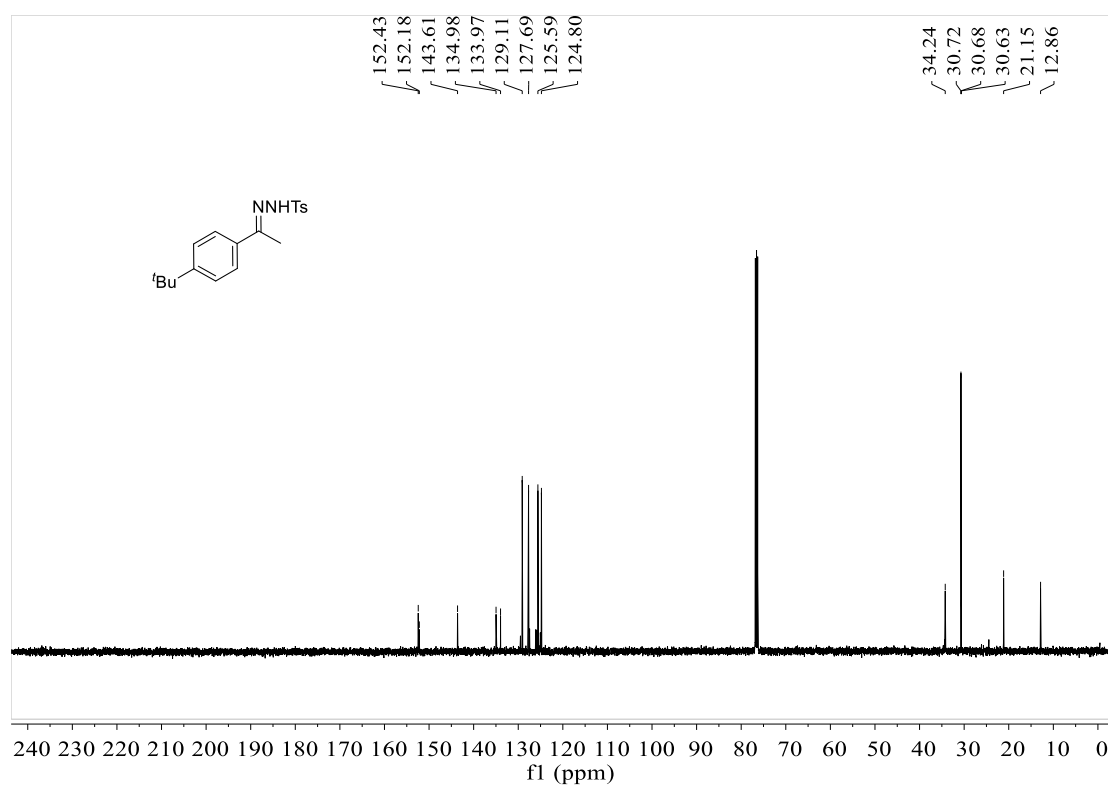

<sup>1</sup>H NMR (500 MHz, CDCl<sub>3</sub>) and <sup>13</sup>C NMR (126 MHz, CDCl<sub>3</sub>) spectra for **30b**:

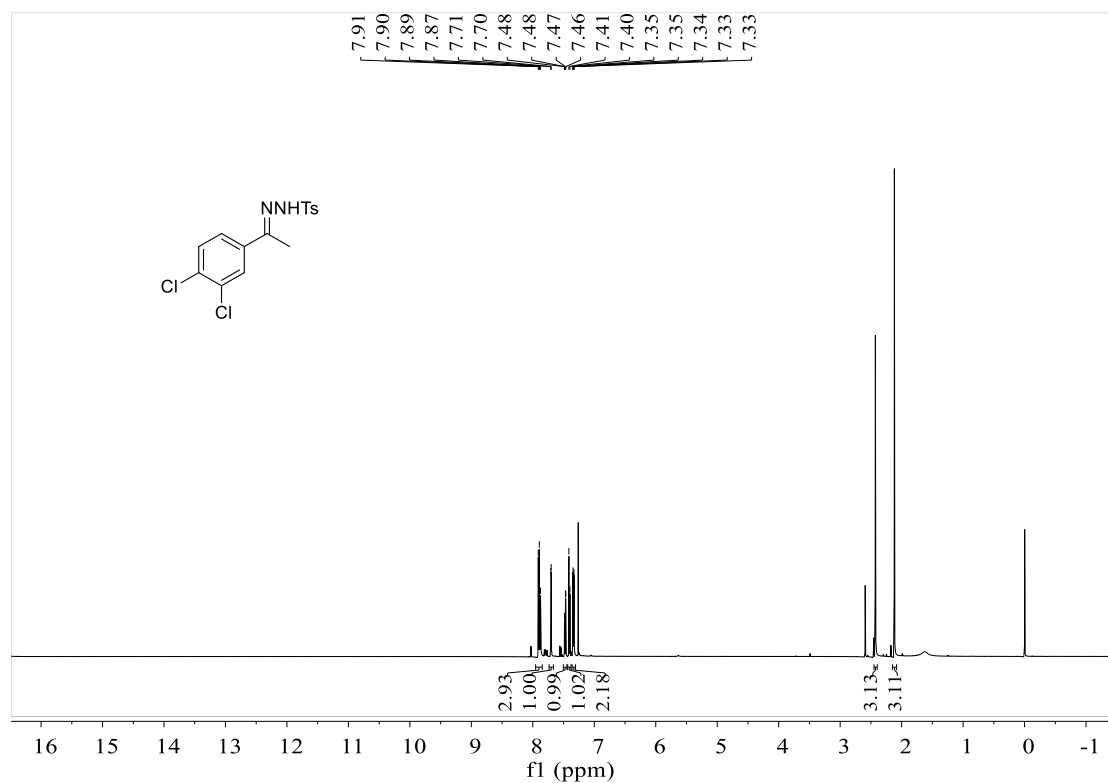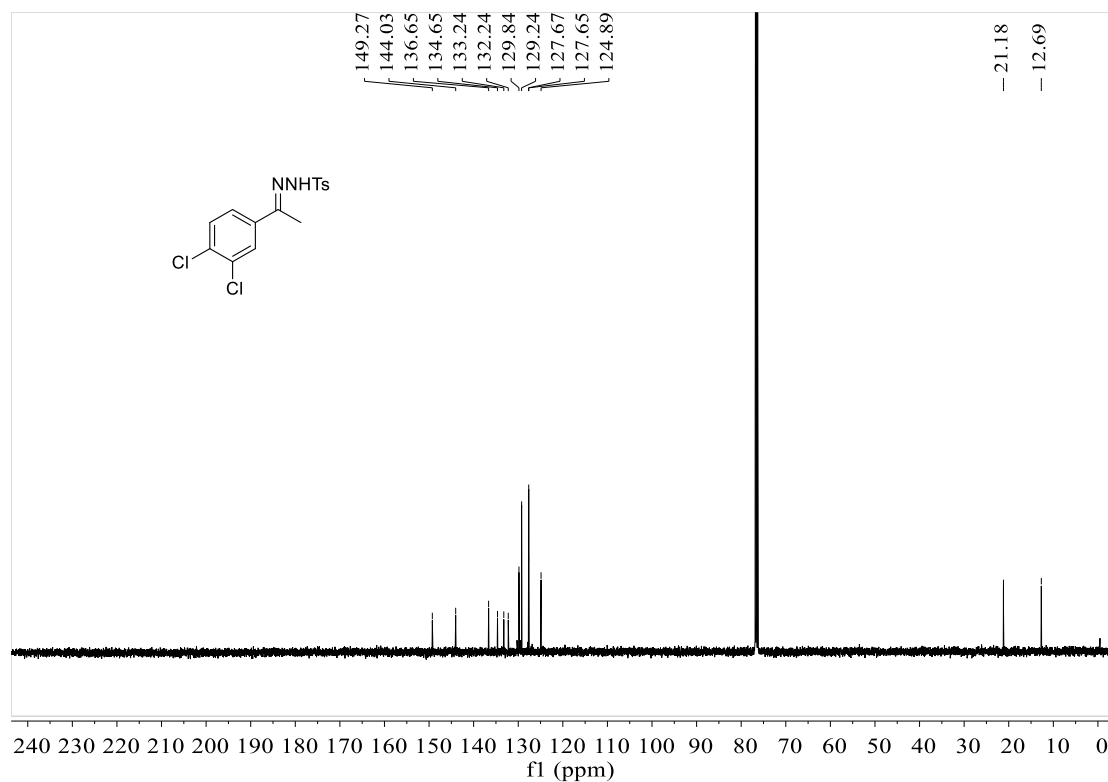

**<sup>1</sup>H NMR (500 MHz, CDCl<sub>3</sub>) spectra for 31b:**

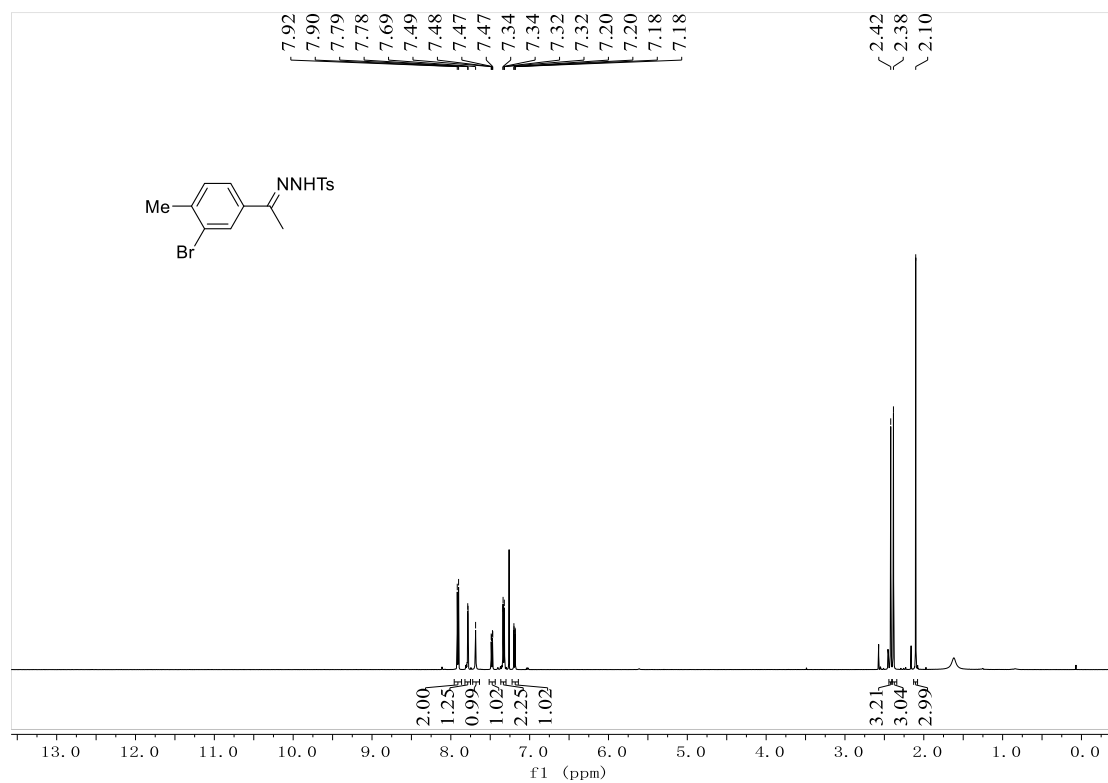

**<sup>1</sup>H NMR (500 MHz, CDCl<sub>3</sub>) and <sup>13</sup>C NMR (126 MHz, CDCl<sub>3</sub>) spectra for 34b:**

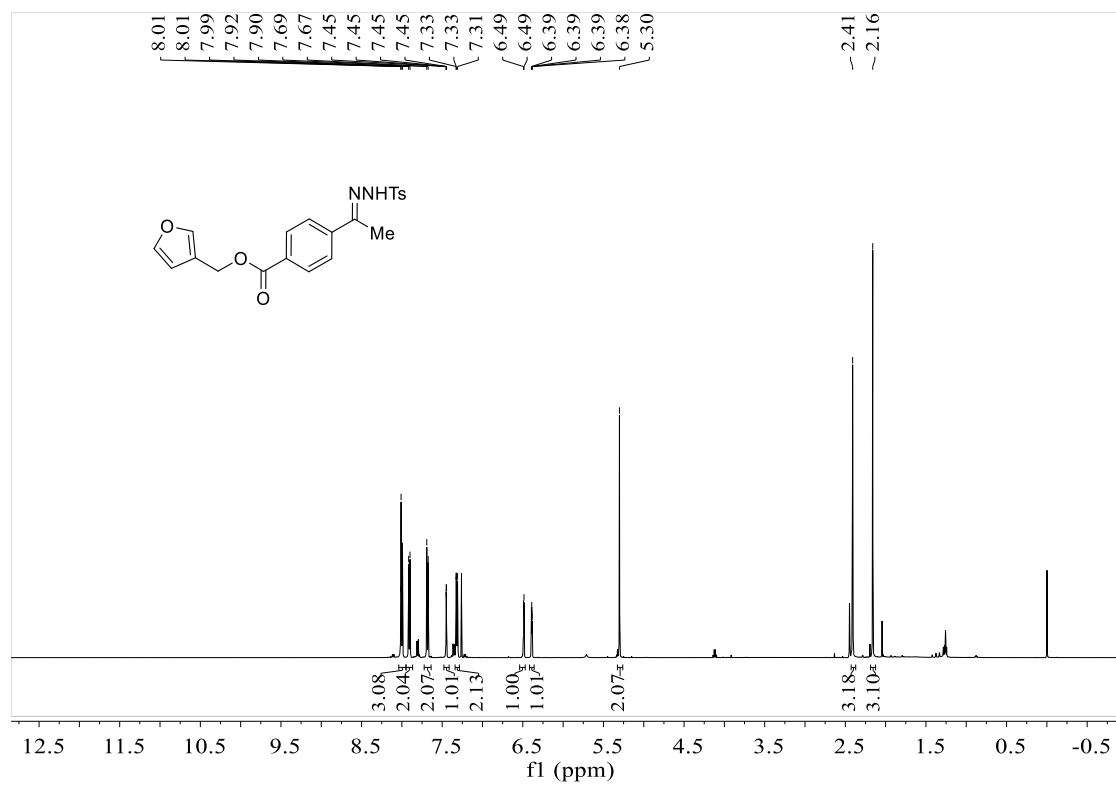

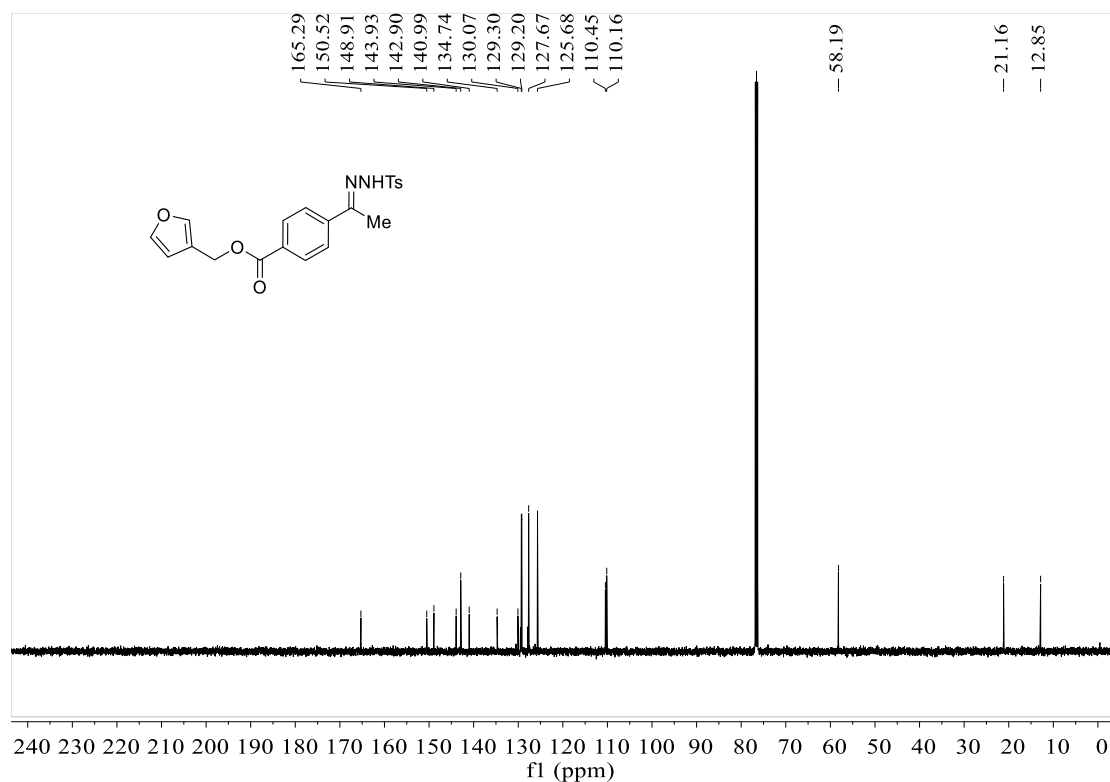

<sup>1</sup>H NMR (500 MHz, DMSO-*d*<sub>6</sub>) and <sup>13</sup>C NMR (126 MHz, CDCl<sub>3</sub>) spectra for **35b**:

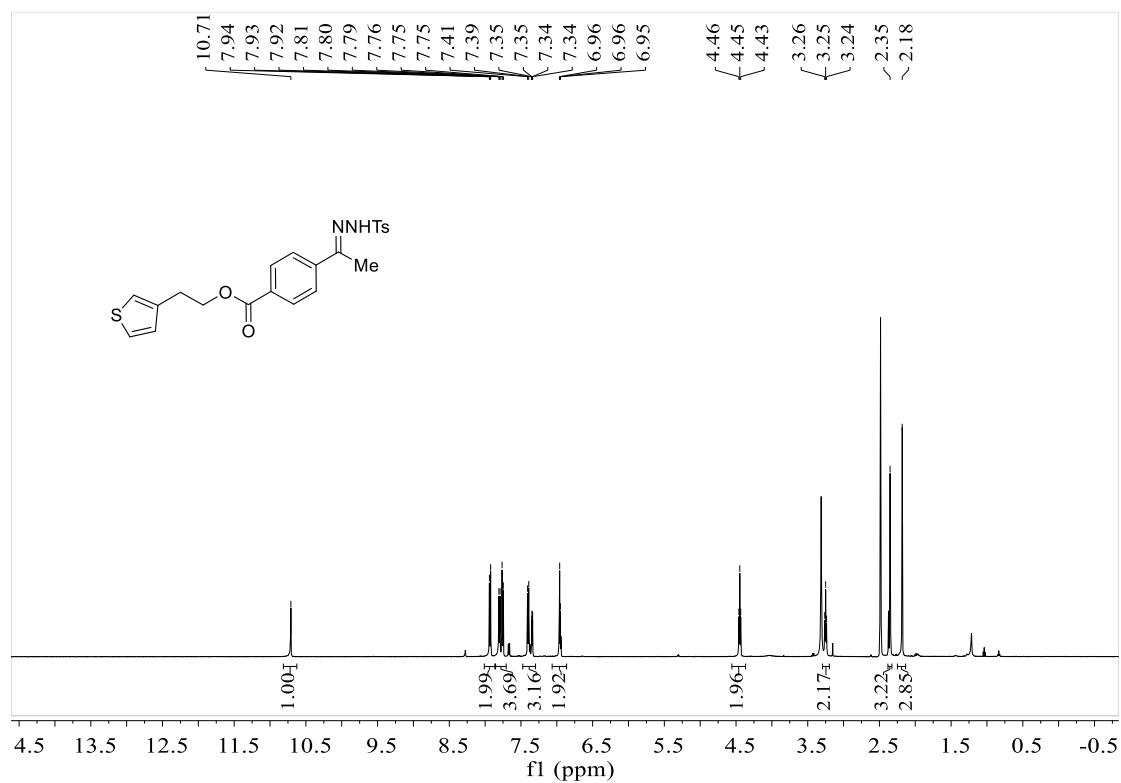

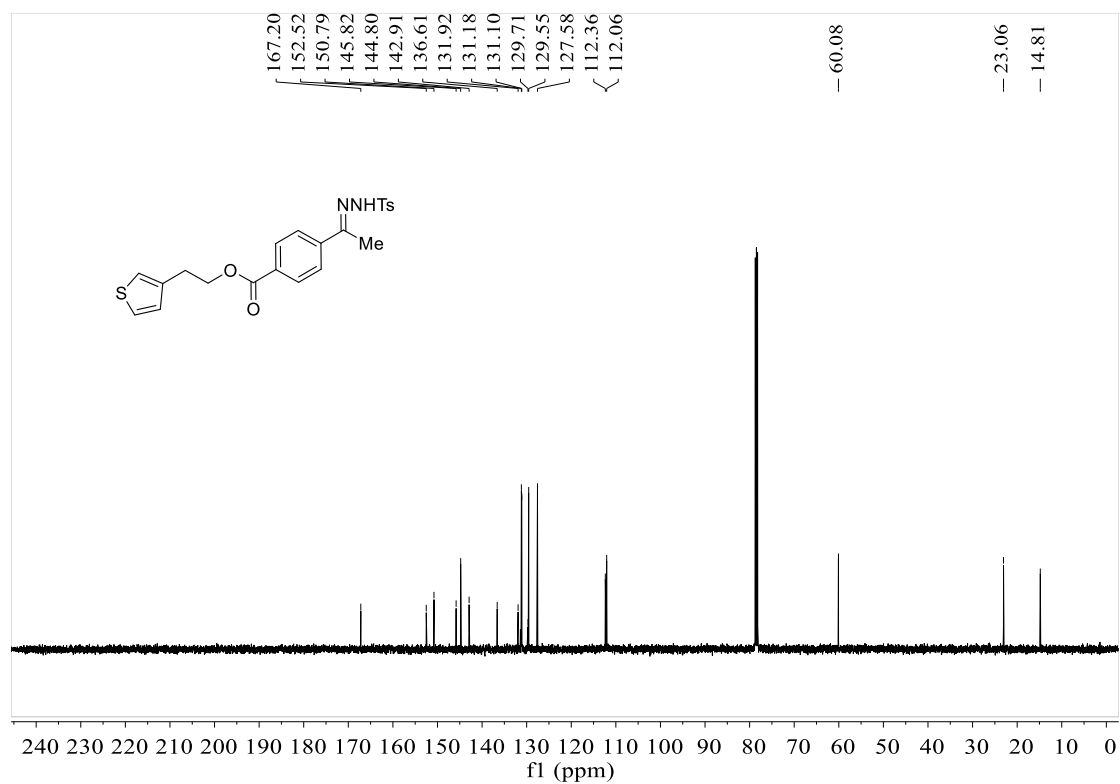

**<sup>1</sup>H NMR (500 MHz, CDCl<sub>3</sub>) and <sup>13</sup>C NMR (126 MHz, CDCl<sub>3</sub>) spectra for **33b**:**

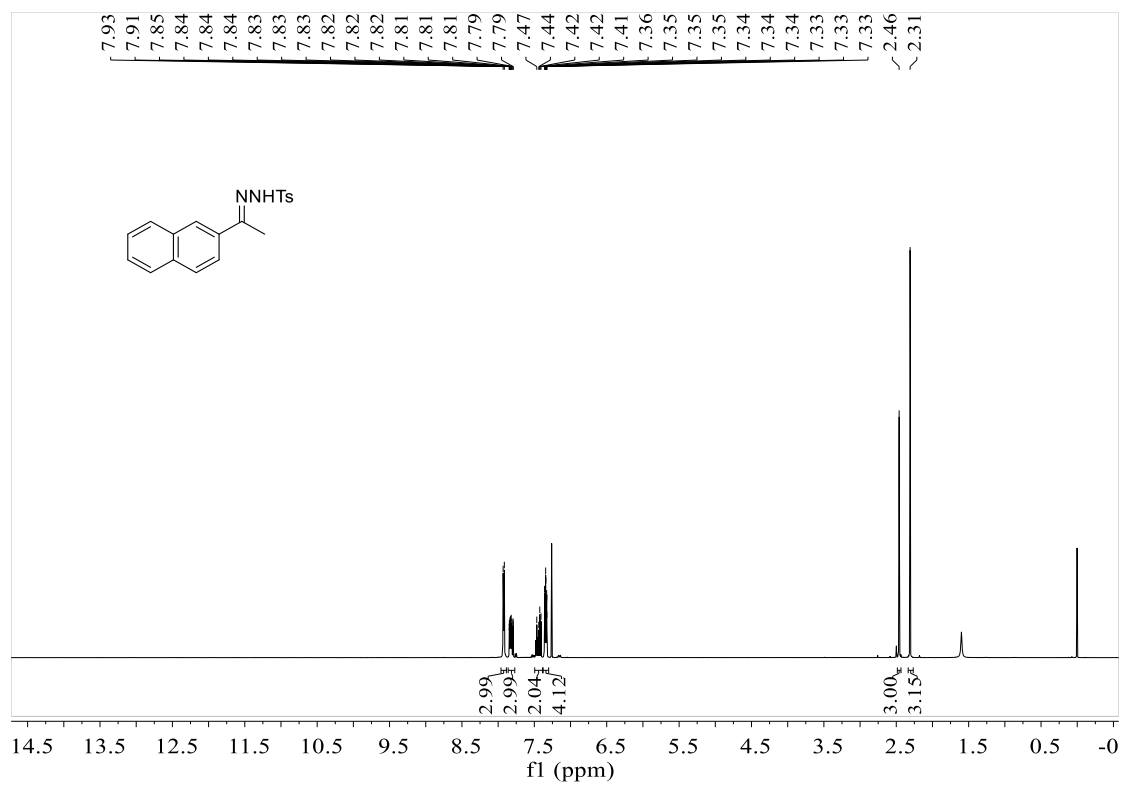

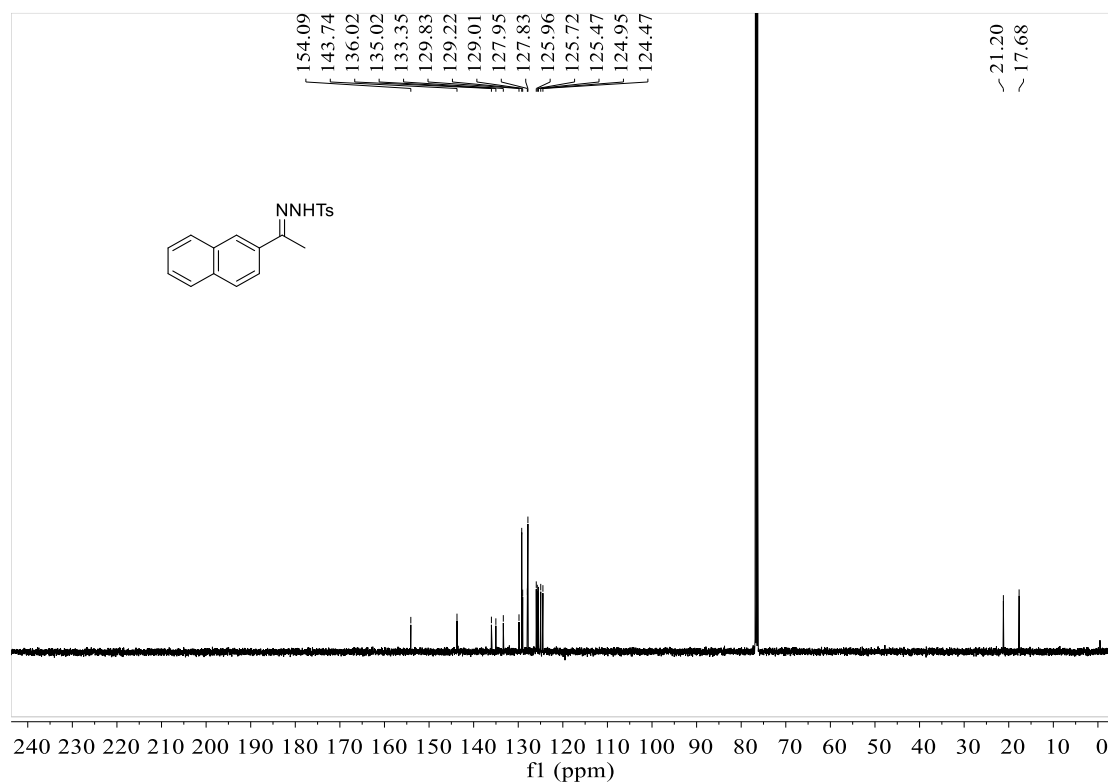

**<sup>1</sup>H NMR (500 MHz, CDCl<sub>3</sub>) spectra for **36b**:**

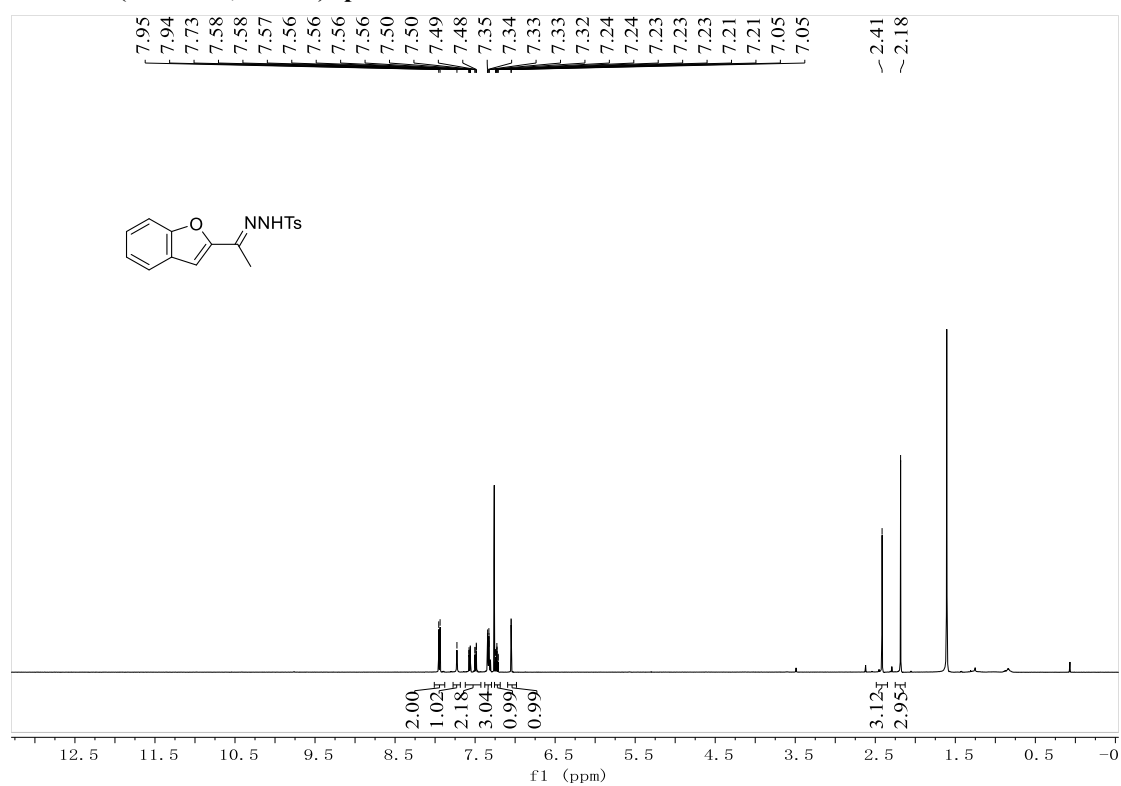



**<sup>1</sup>H NMR (500 MHz, DMSO-*d*<sub>6</sub>) and <sup>13</sup>C NMR (126 MHz, DMSO-*d*<sub>6</sub>) spectra for **37b**:**

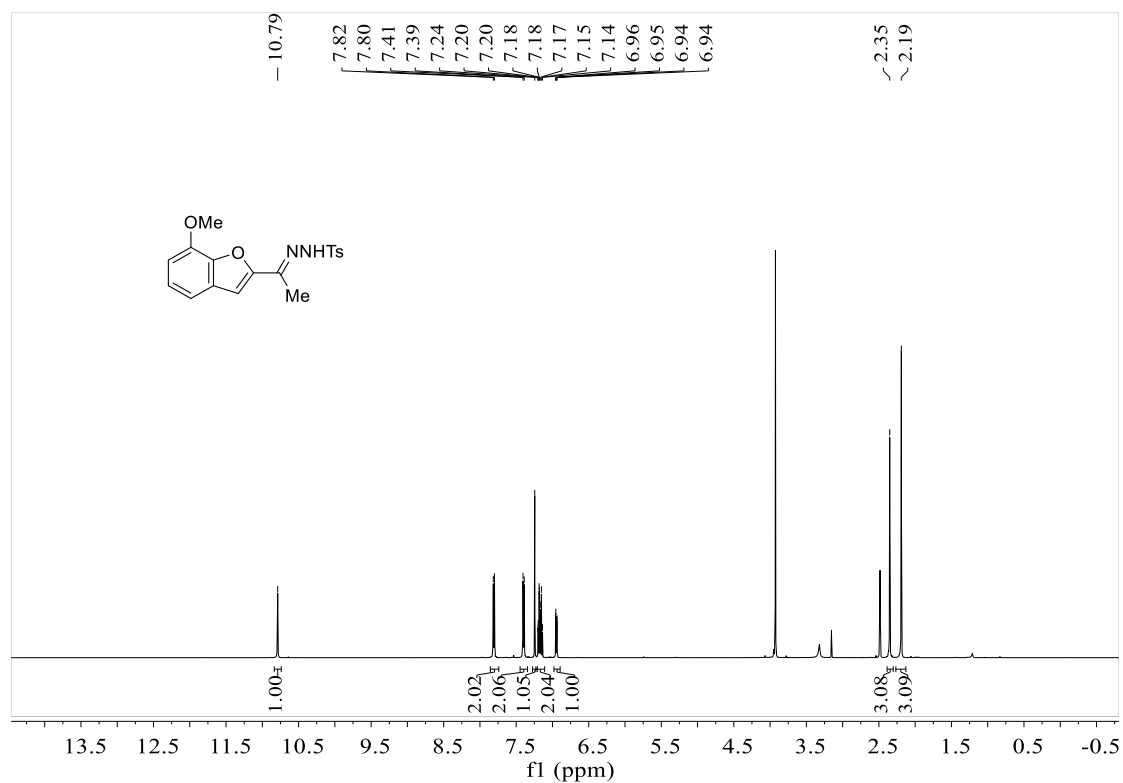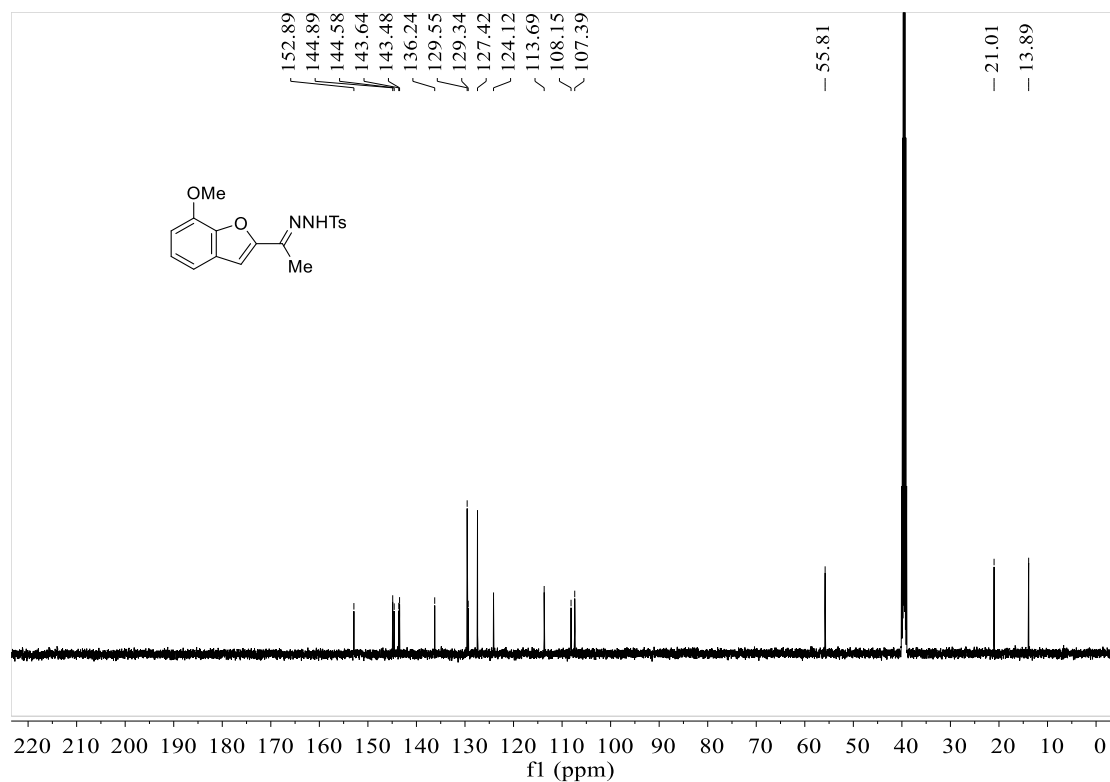

**<sup>1</sup>H NMR (500 MHz, DMSO-*d*<sub>6</sub>) and <sup>13</sup>C NMR (126 MHz, DMSO-*d*<sub>6</sub>) spectra for **38b**:**

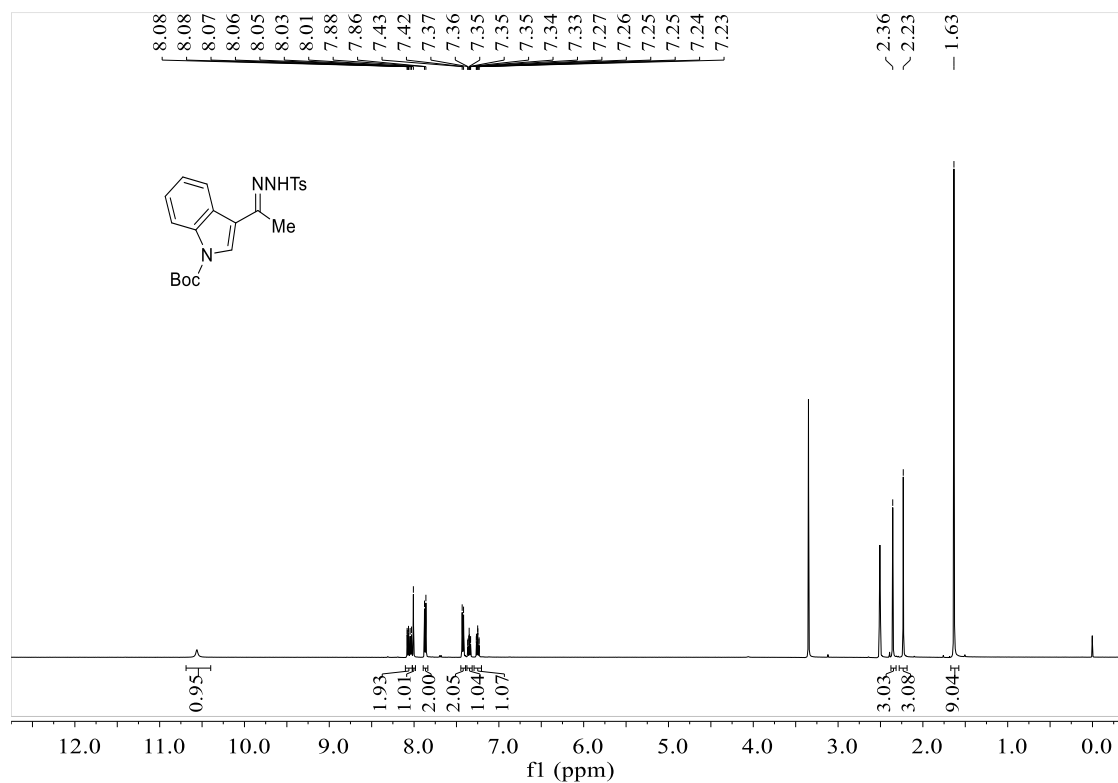

**<sup>1</sup>H NMR (500 MHz, DMSO-*d*<sub>6</sub>) and <sup>13</sup>C NMR (126 MHz, DMSO-*d*<sub>6</sub>) spectra for **39b**:**

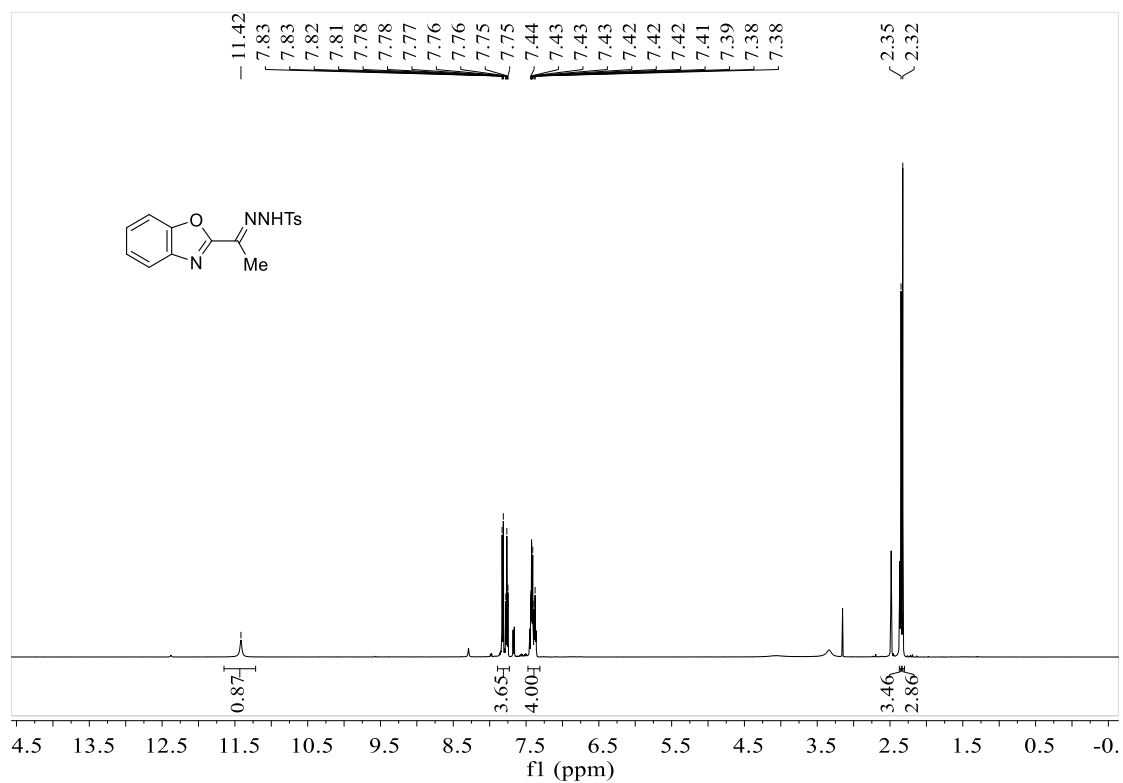

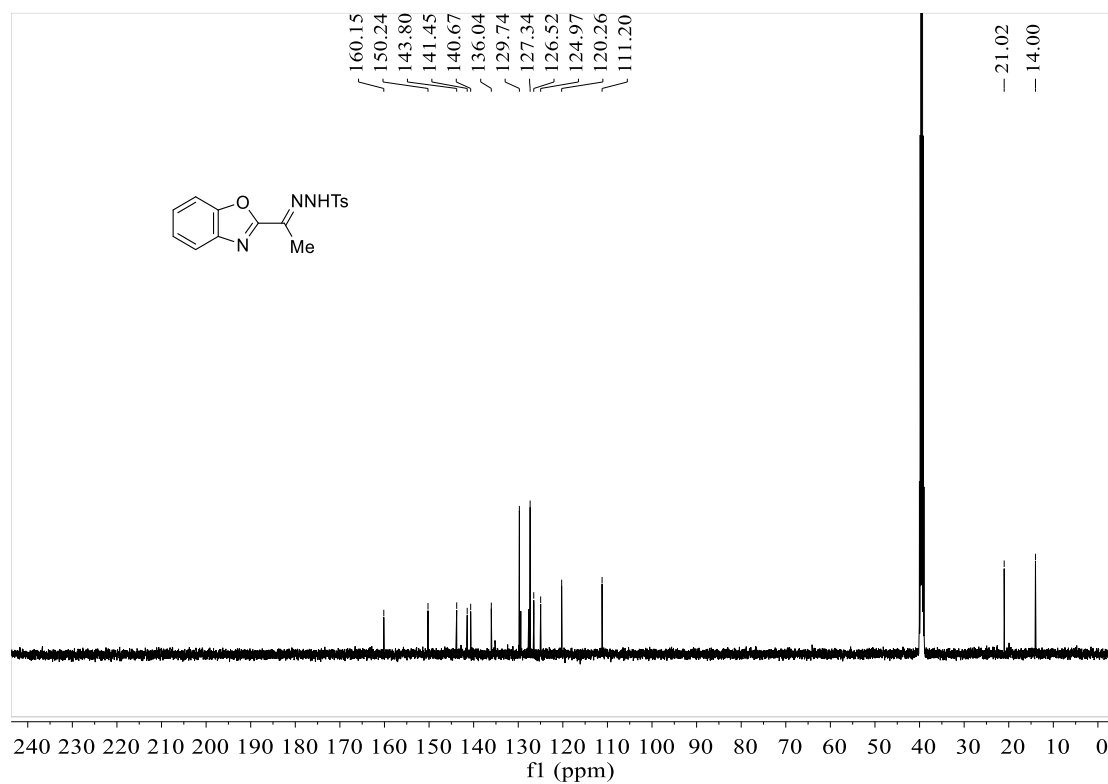

<sup>1</sup>H NMR (500 MHz, DMSO-*d*<sub>6</sub>) and <sup>13</sup>C NMR (126 MHz, DMSO-*d*<sub>6</sub>) spectra for **40b**:

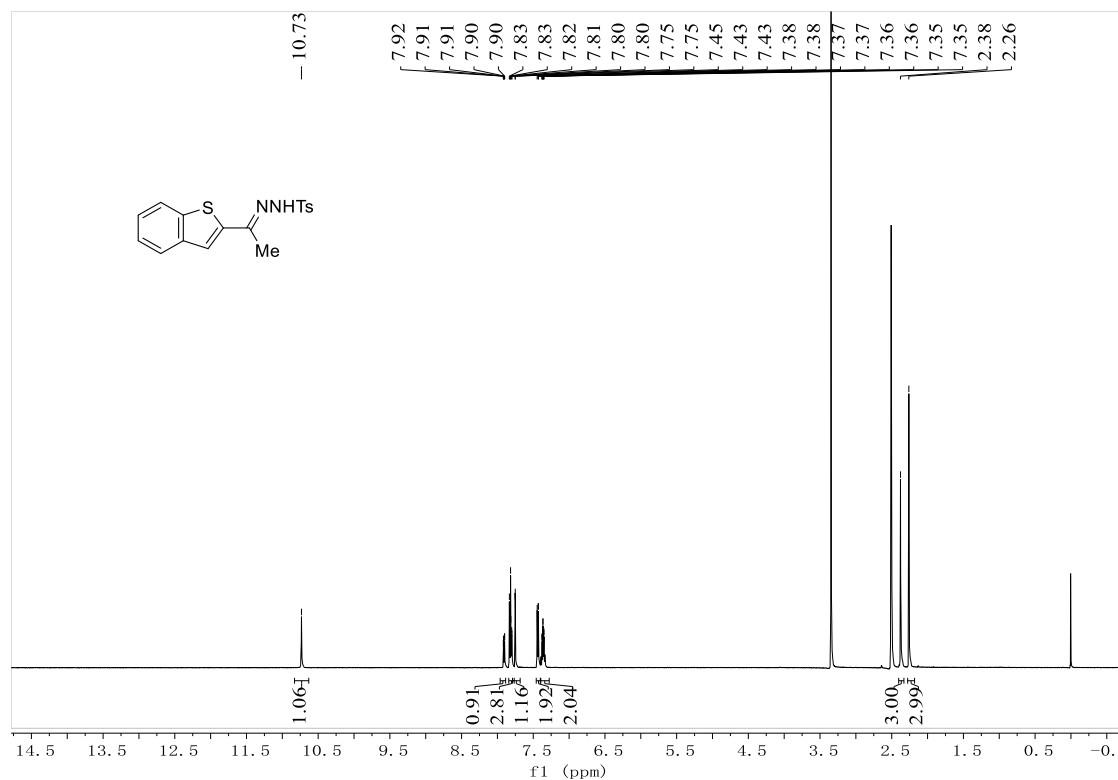

**<sup>1</sup>H NMR (500 MHz, CDCl<sub>3</sub>) spectra for 41b:**

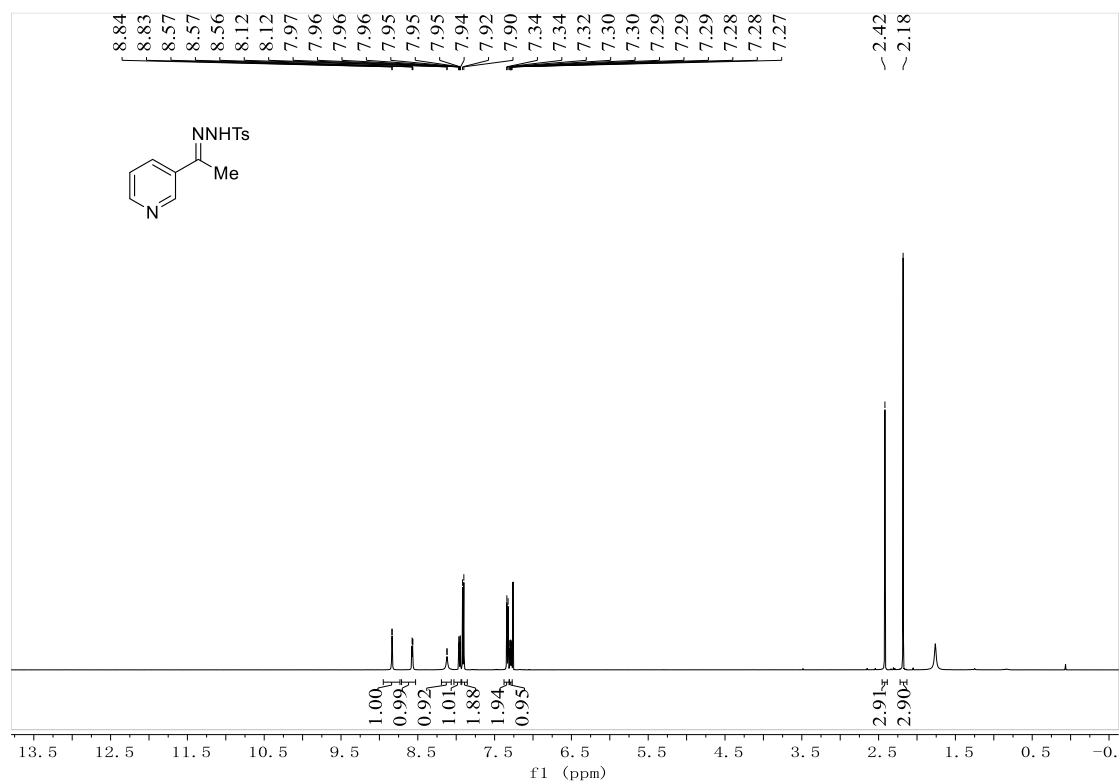

**<sup>1</sup>H NMR (500 MHz, CDCl<sub>3</sub>) and <sup>13</sup>C NMR (126 MHz, CDCl<sub>3</sub>) spectra for 43b:**

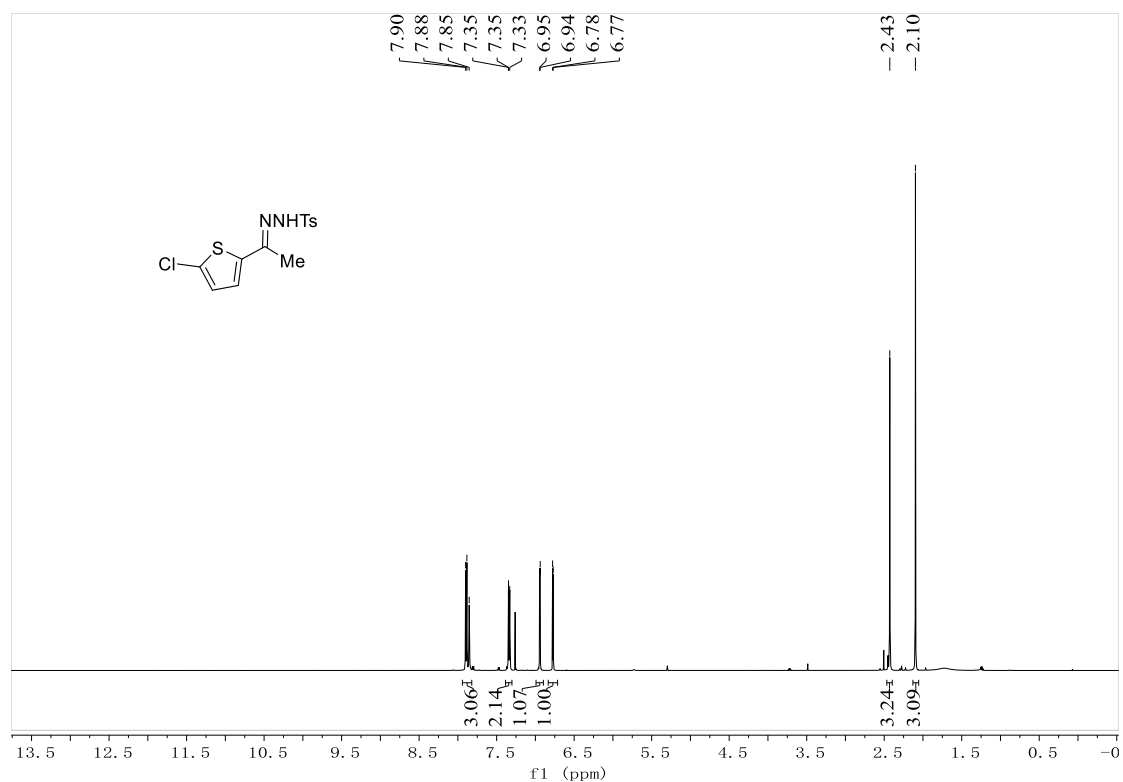

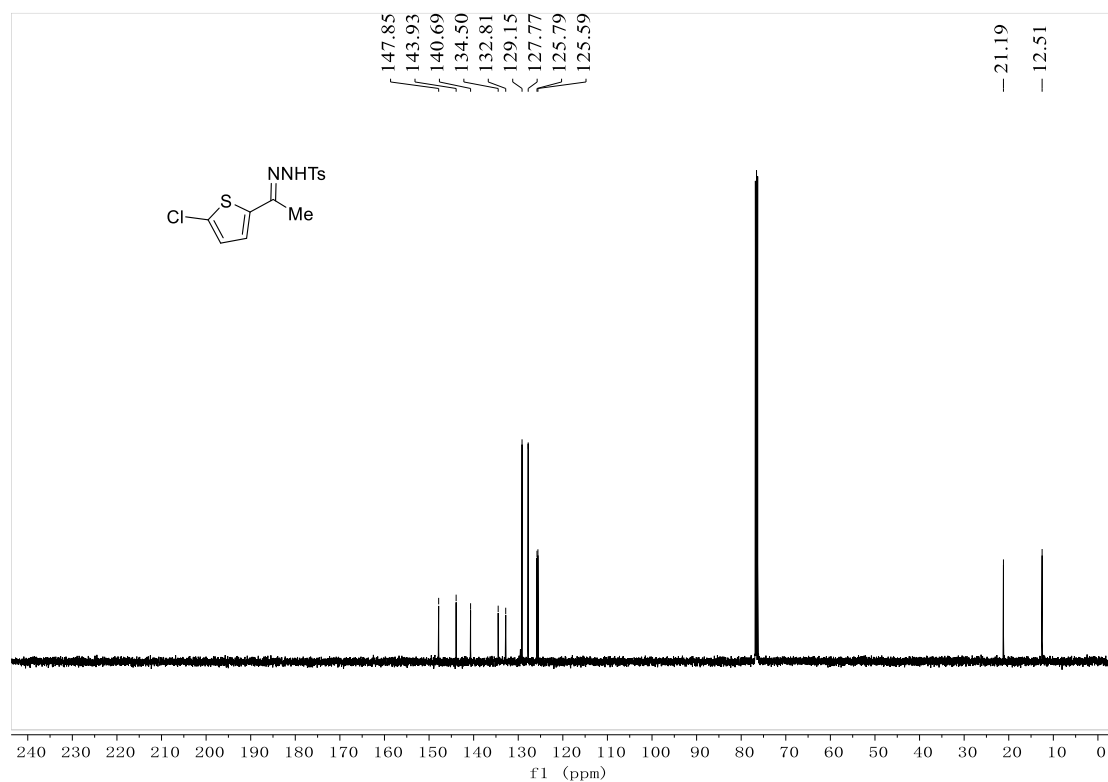

**<sup>1</sup>H NMR (500 MHz, CDCl<sub>3</sub>) spectra for 44b:**

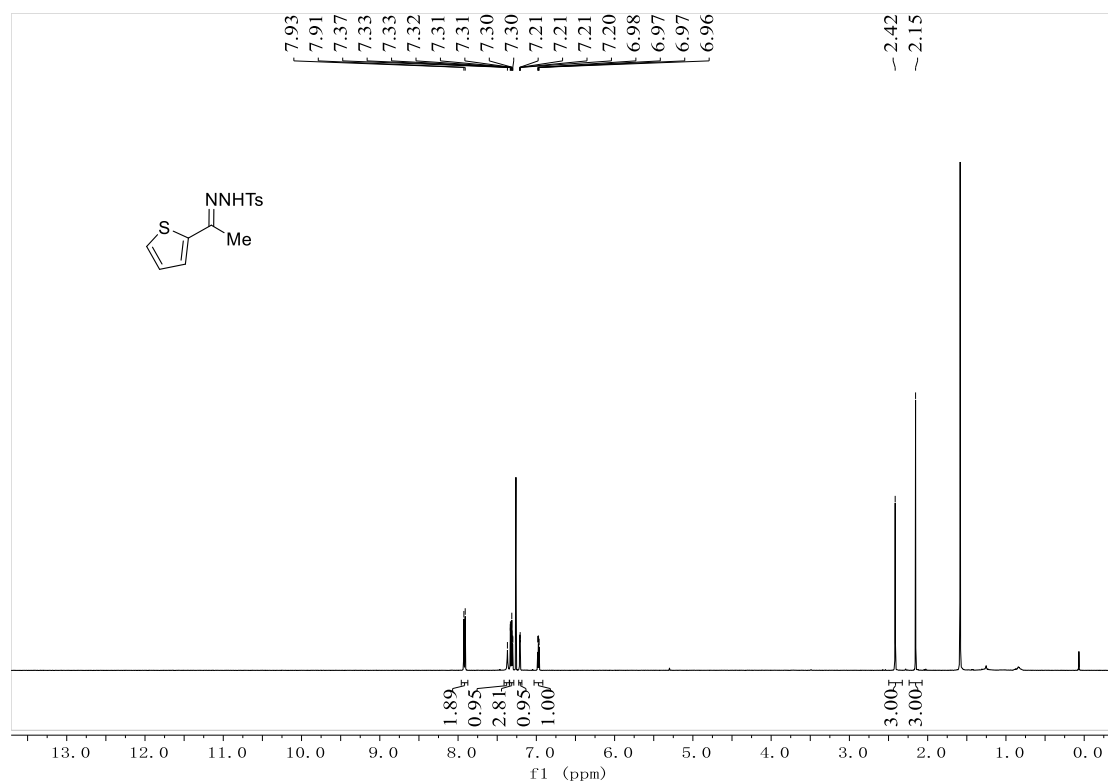

<sup>1</sup>H NMR (500 MHz, CDCl<sub>3</sub>) spectra for **45b**:

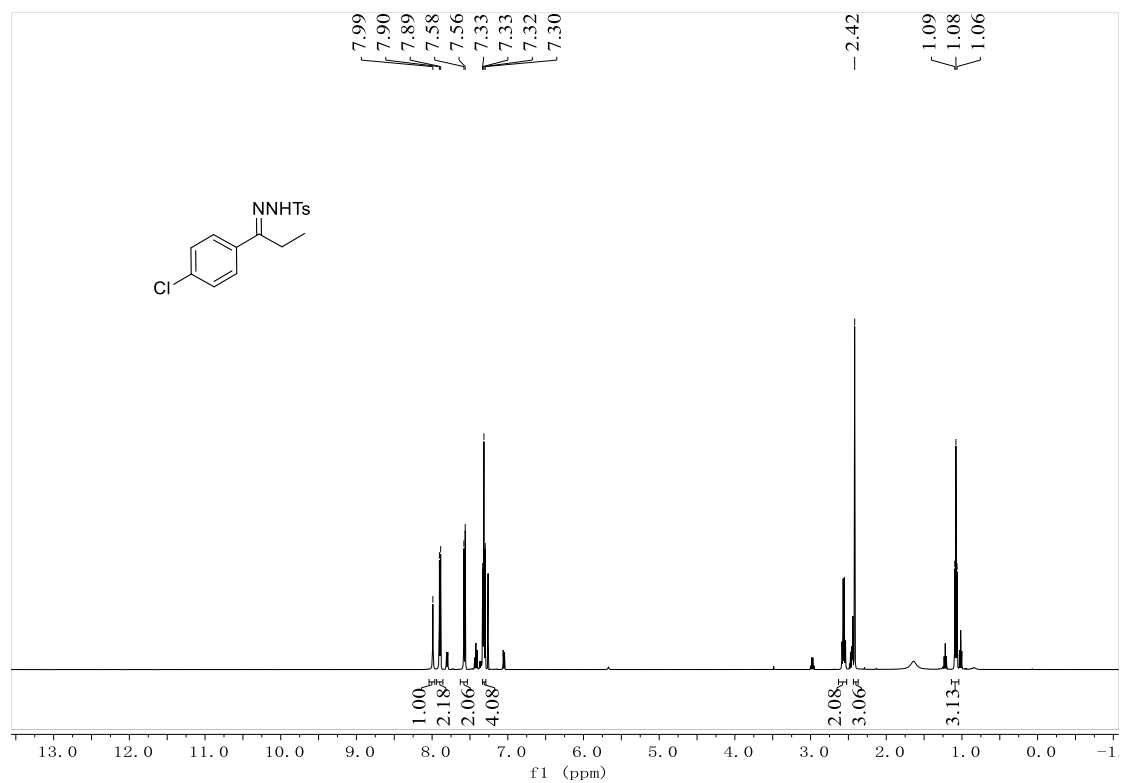

<sup>1</sup>H NMR (500 MHz, CDCl<sub>3</sub>) spectra for **46b**:

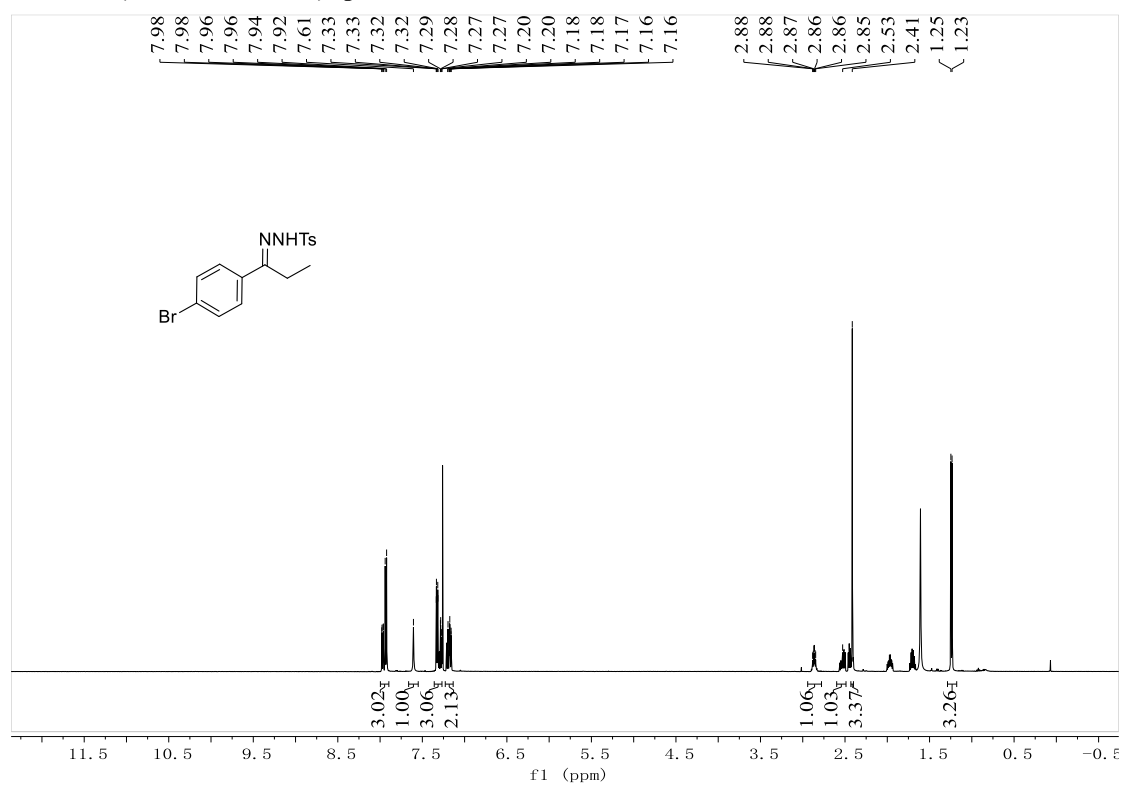

**<sup>1</sup>H NMR (500 MHz, CDCl<sub>3</sub>) spectra for 47b:**

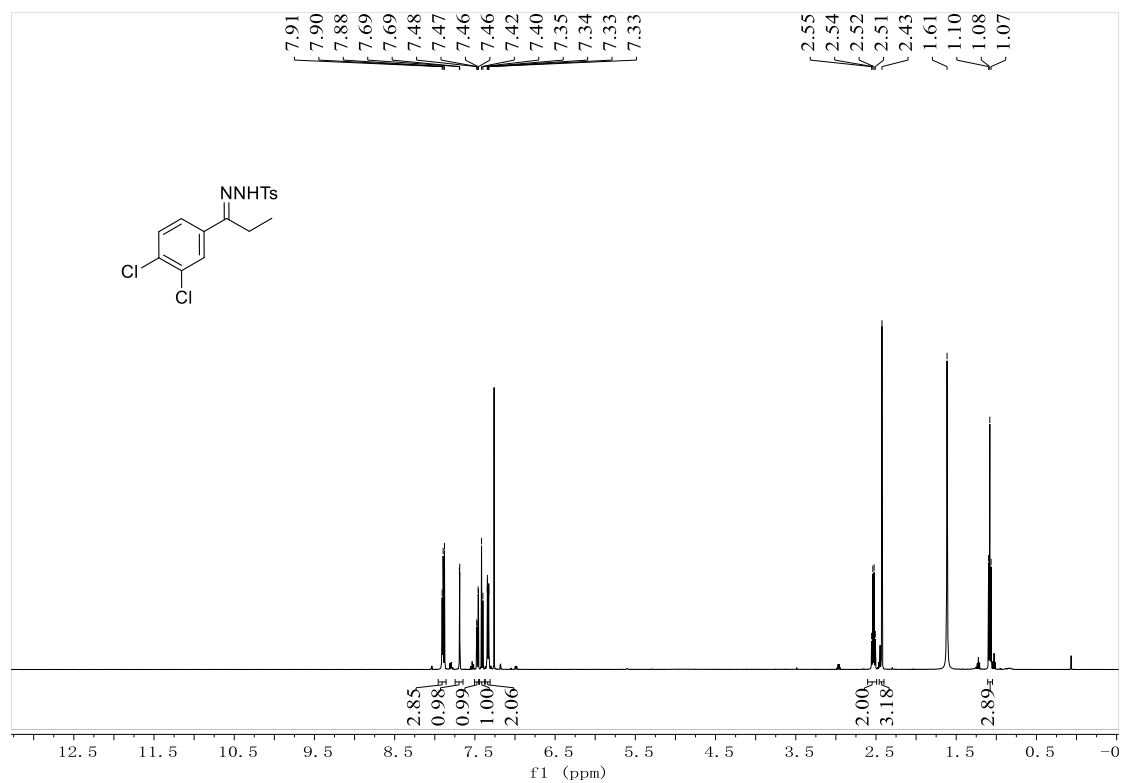

**<sup>1</sup>H NMR (500 MHz, CDCl<sub>3</sub>) spectra for 48b:**

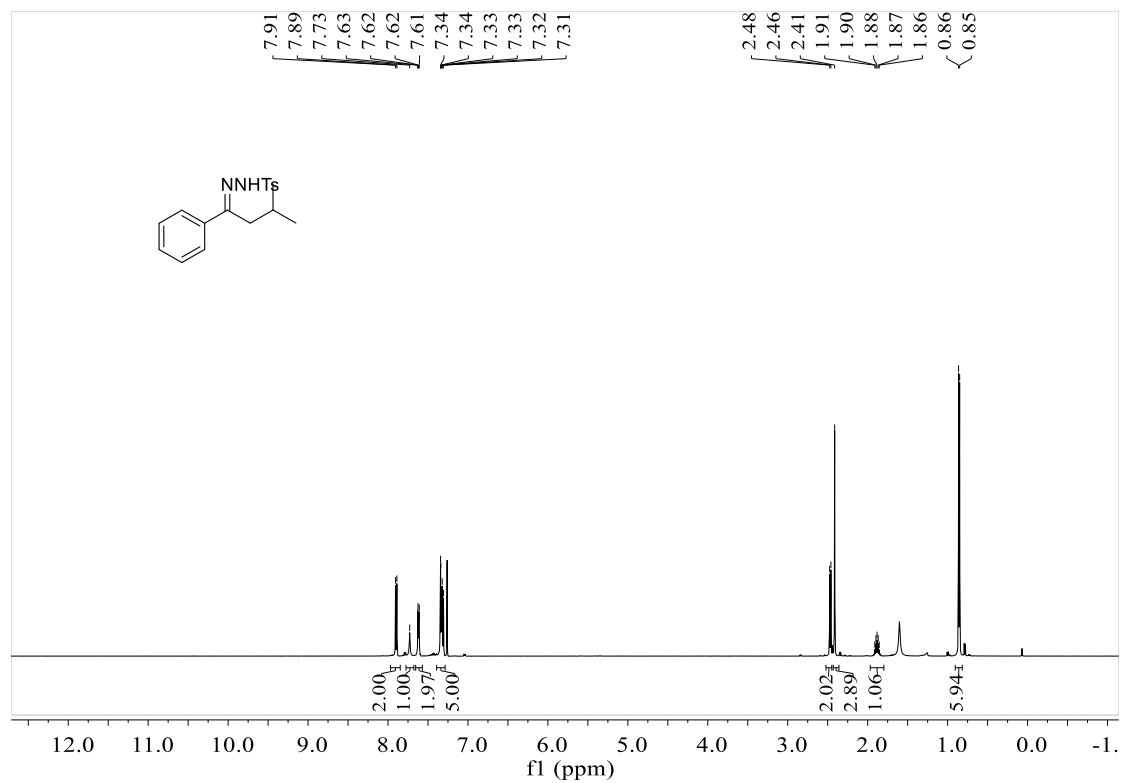

**<sup>1</sup>H NMR (500 MHz, CDCl<sub>3</sub>) spectra for 50b:**

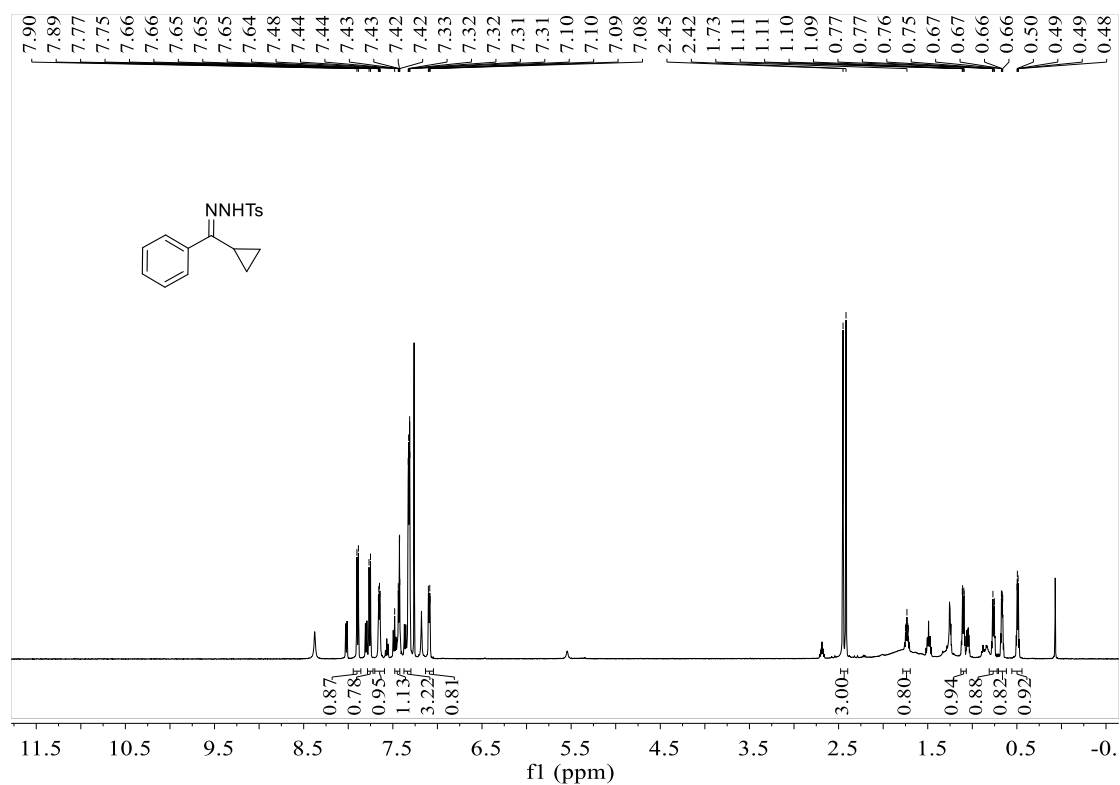

**<sup>1</sup>H NMR (500 MHz, CDCl<sub>3</sub>) spectra for 51b:**

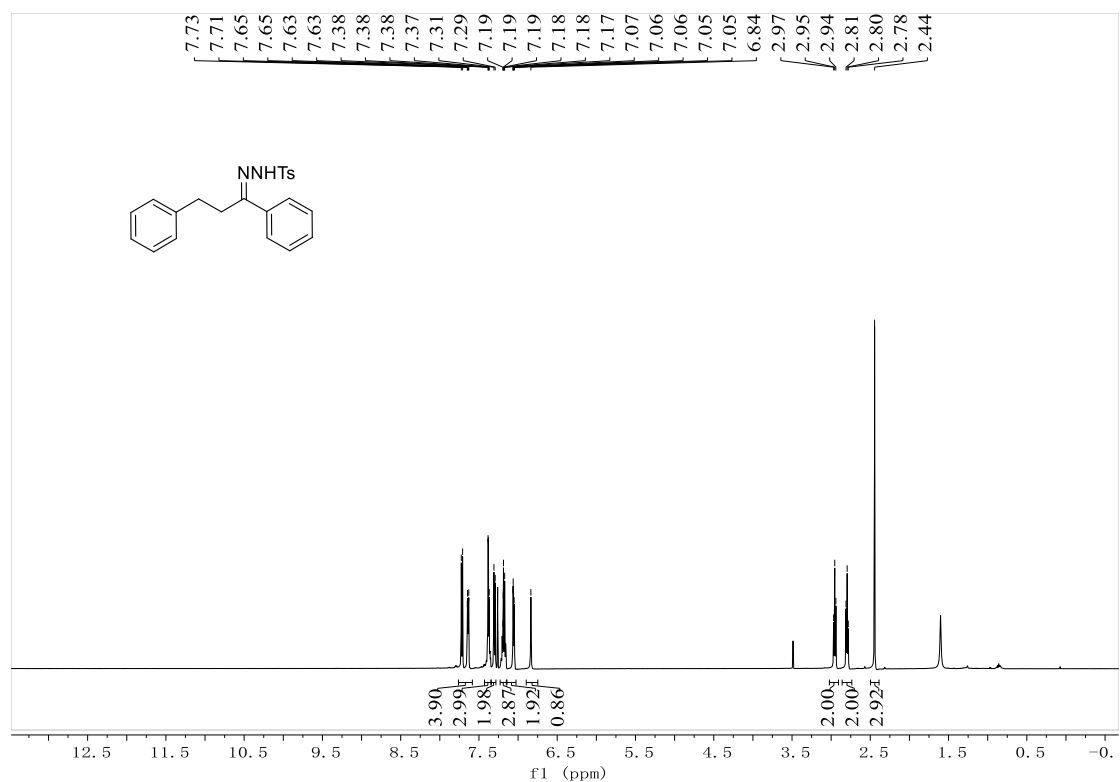



**<sup>1</sup>H NMR (500 MHz, CDCl<sub>3</sub>) and <sup>13</sup>C NMR (126 MHz, CDCl<sub>3</sub>) spectra for 52b:**

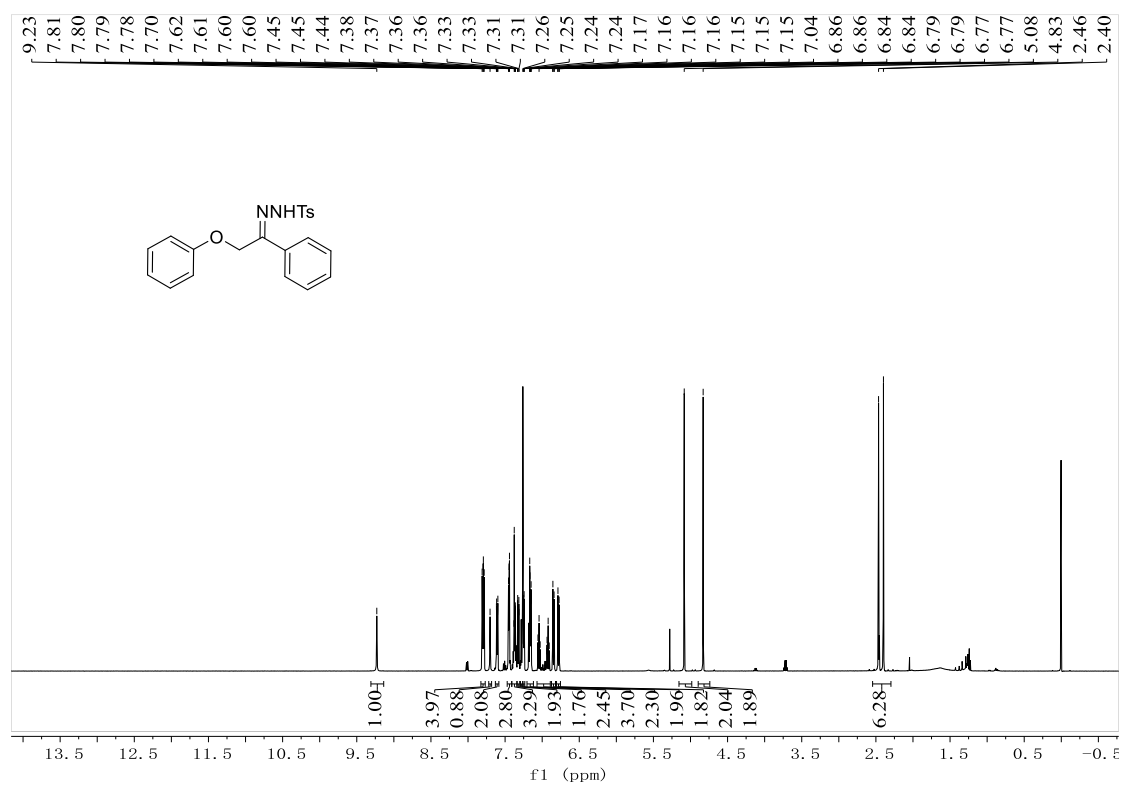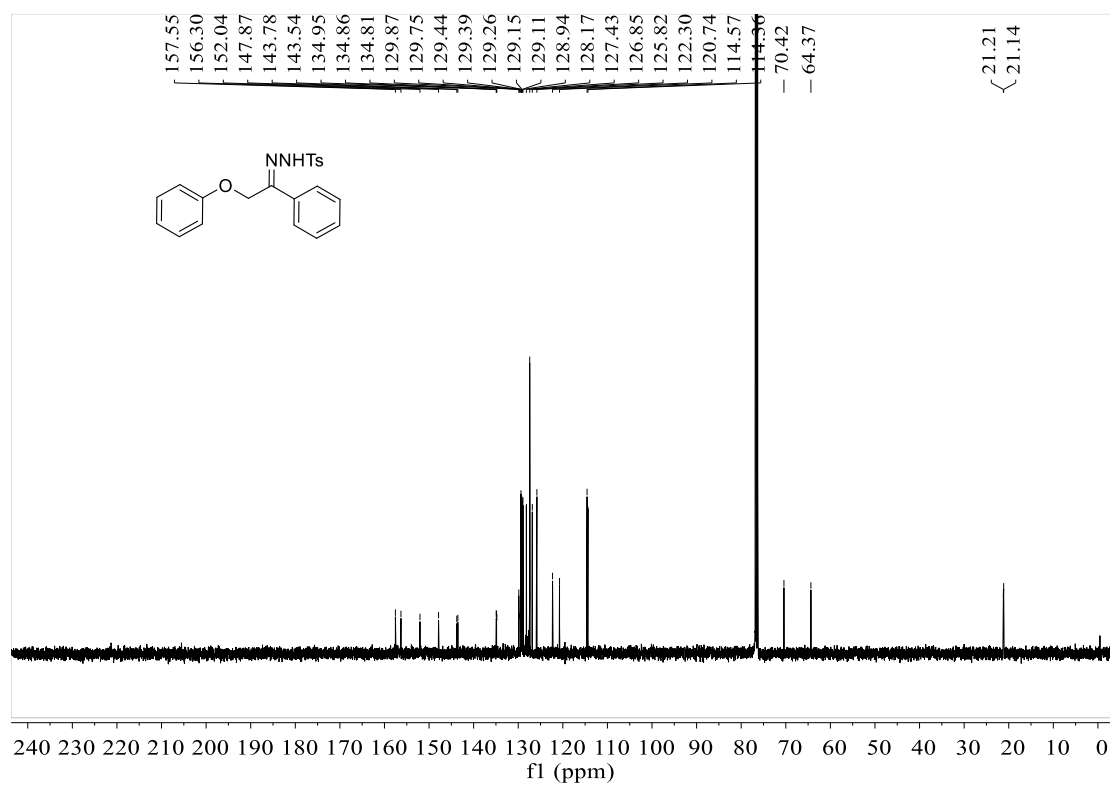

<sup>1</sup>H NMR (500 MHz, CDCl<sub>3</sub>) and <sup>13</sup>C NMR (126 MHz, CDCl<sub>3</sub>) spectra for **53b**:

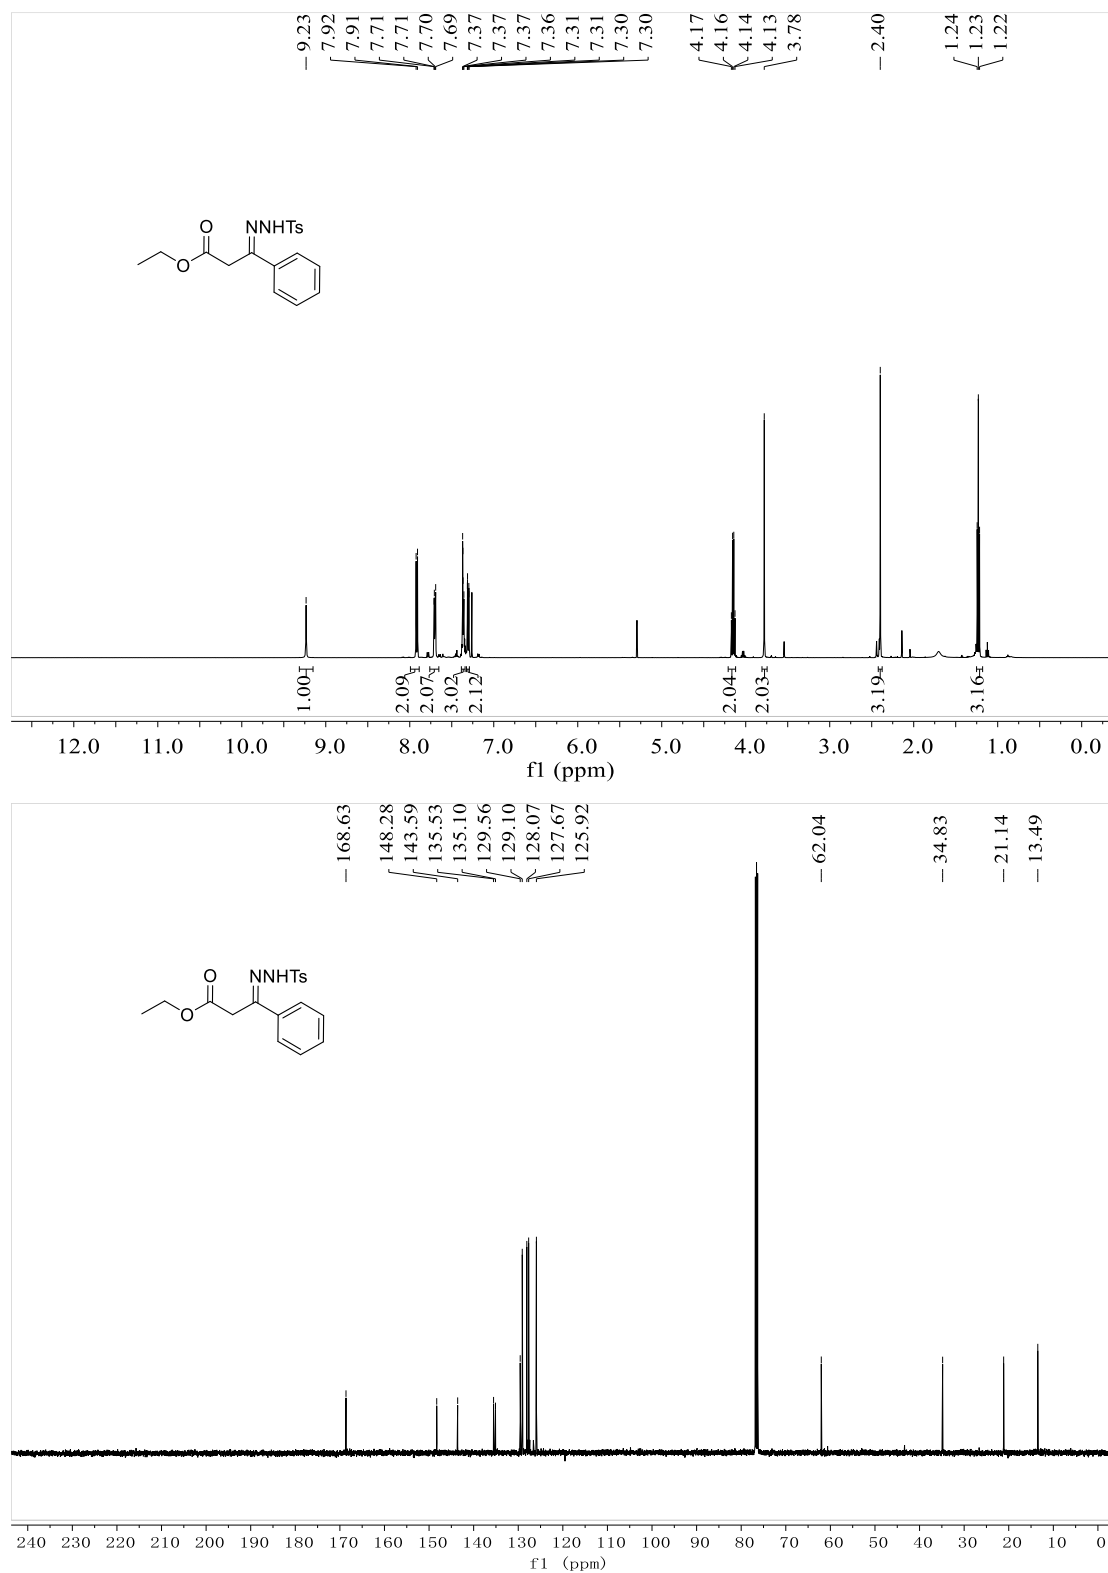

**<sup>1</sup>H NMR (500 MHz, CDCl<sub>3</sub>) spectra for 54b:**

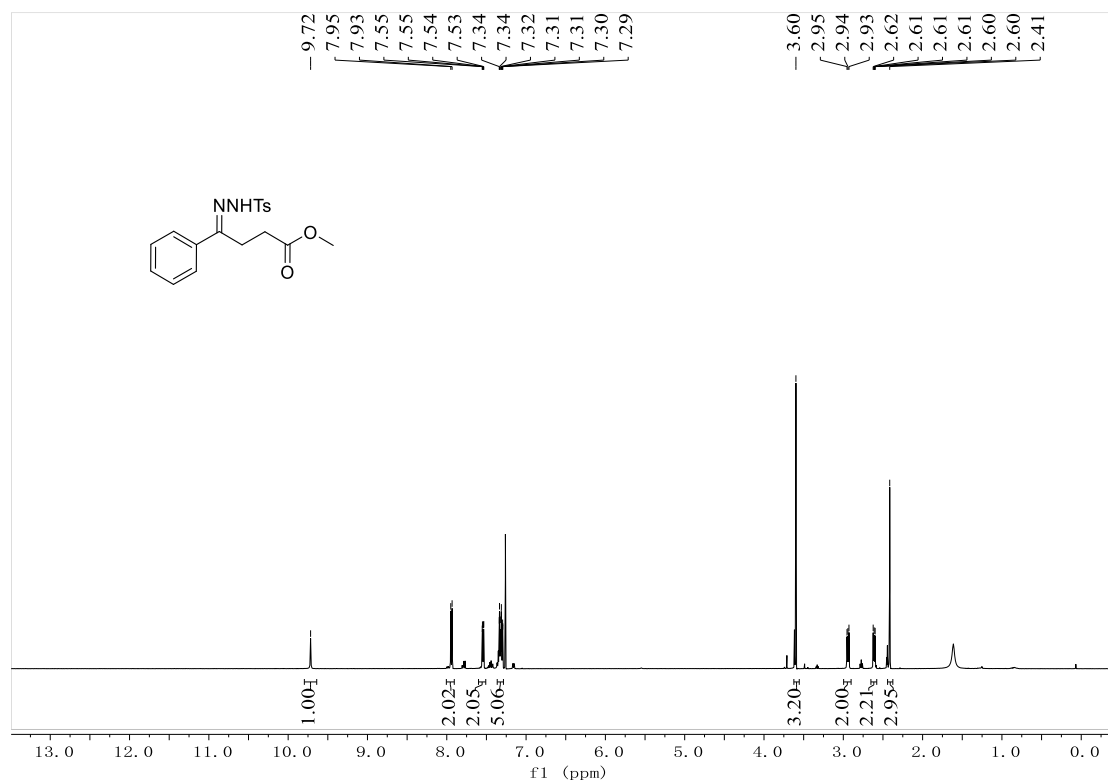

**<sup>1</sup>H NMR (500 MHz, CDCl<sub>3</sub>) and <sup>13</sup>C NMR (126 MHz, CDCl<sub>3</sub>) spectra for 55b:**

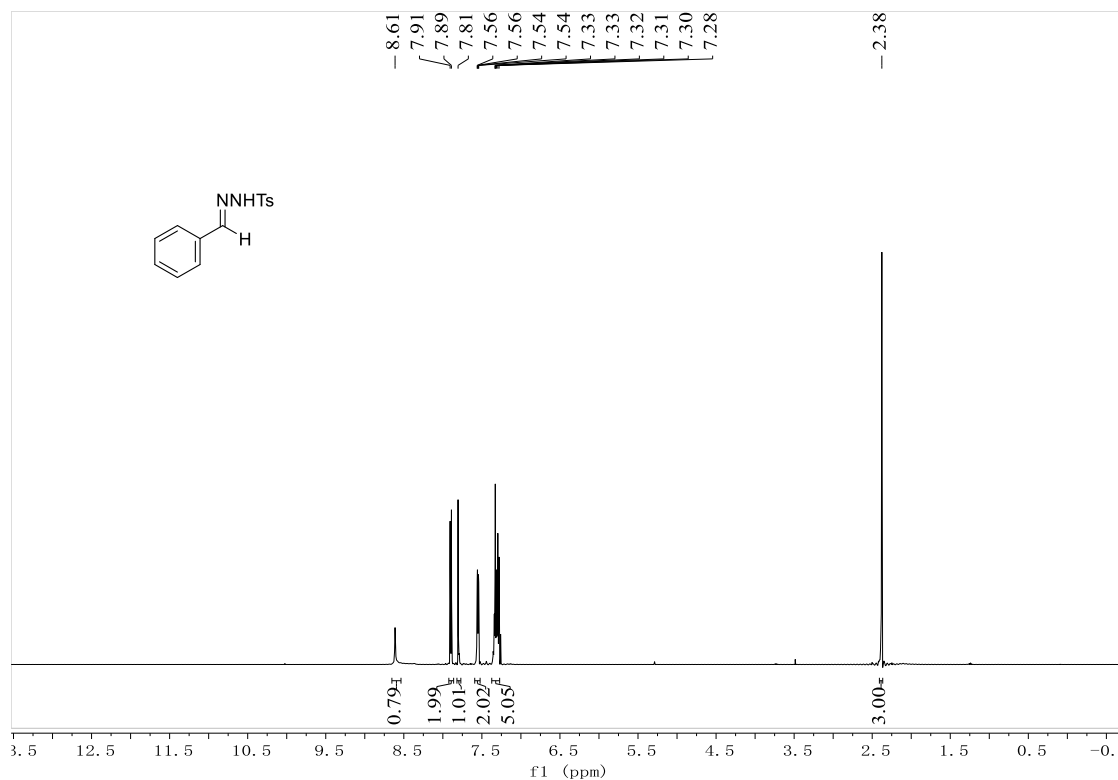

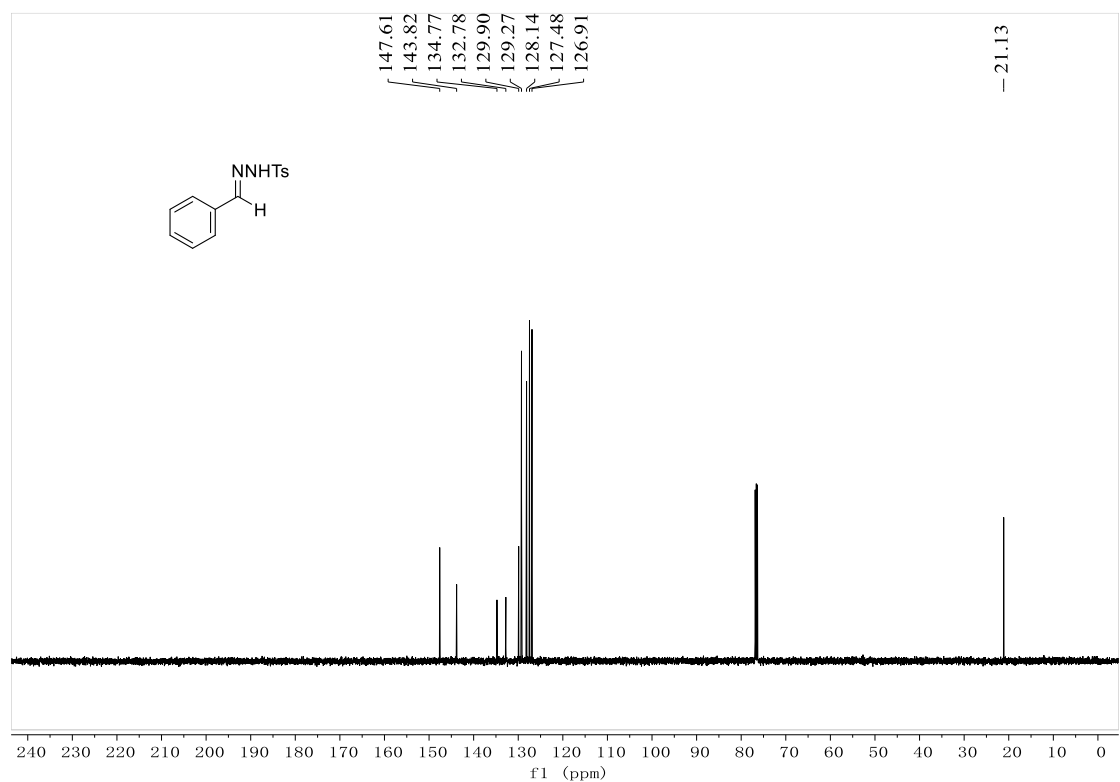

**<sup>1</sup>H NMR (500 MHz, CDCl<sub>3</sub>) spectra for 56b:**

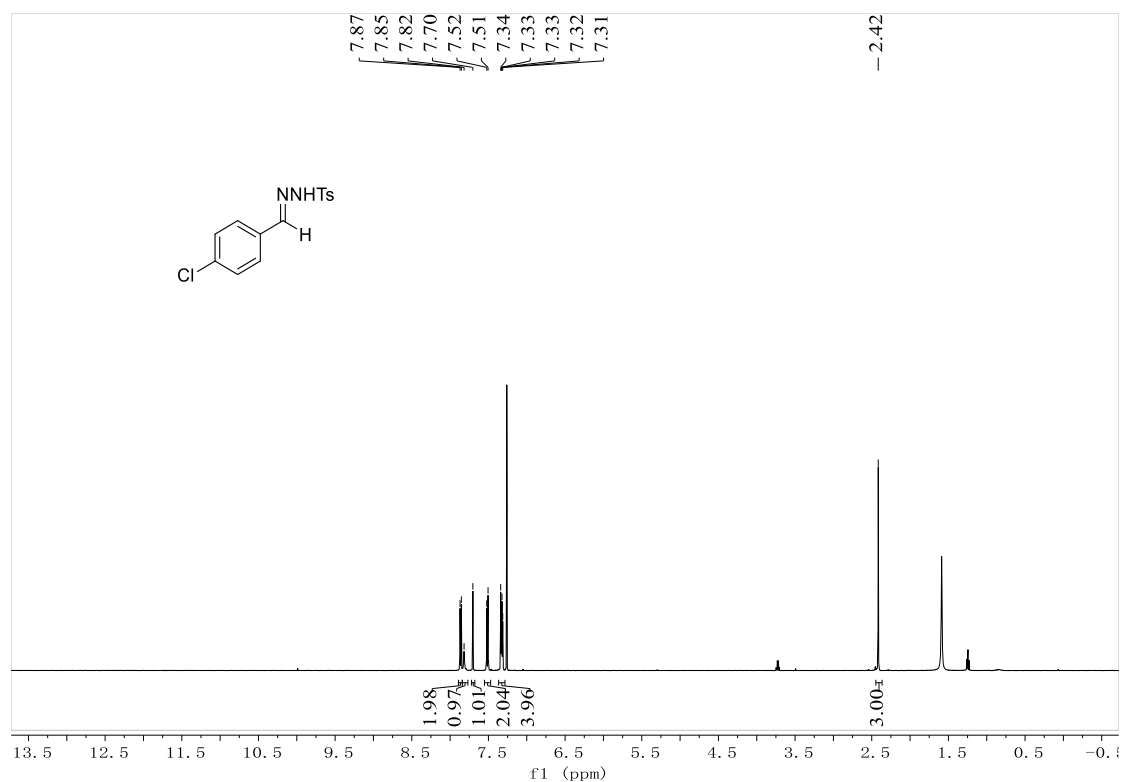

**<sup>1</sup>H NMR (500 MHz, CDCl<sub>3</sub>) spectra for 57b:**

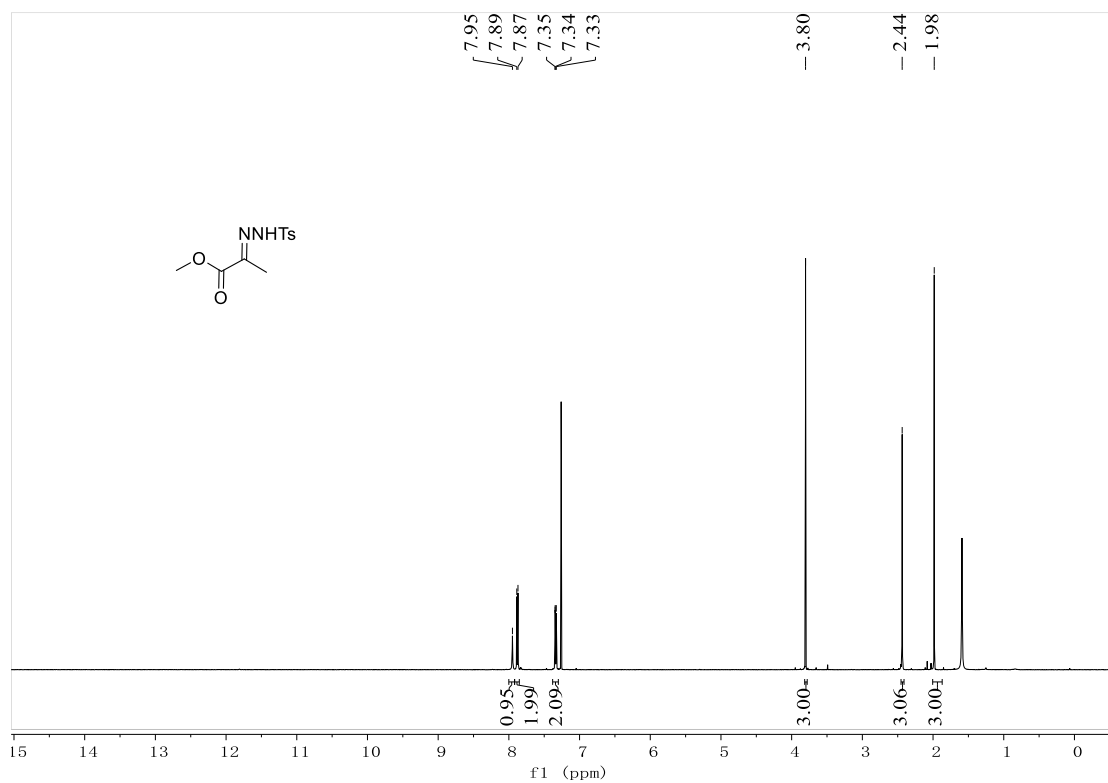

**<sup>1</sup>H NMR (500 MHz, CDCl<sub>3</sub>) spectra for 88b:**

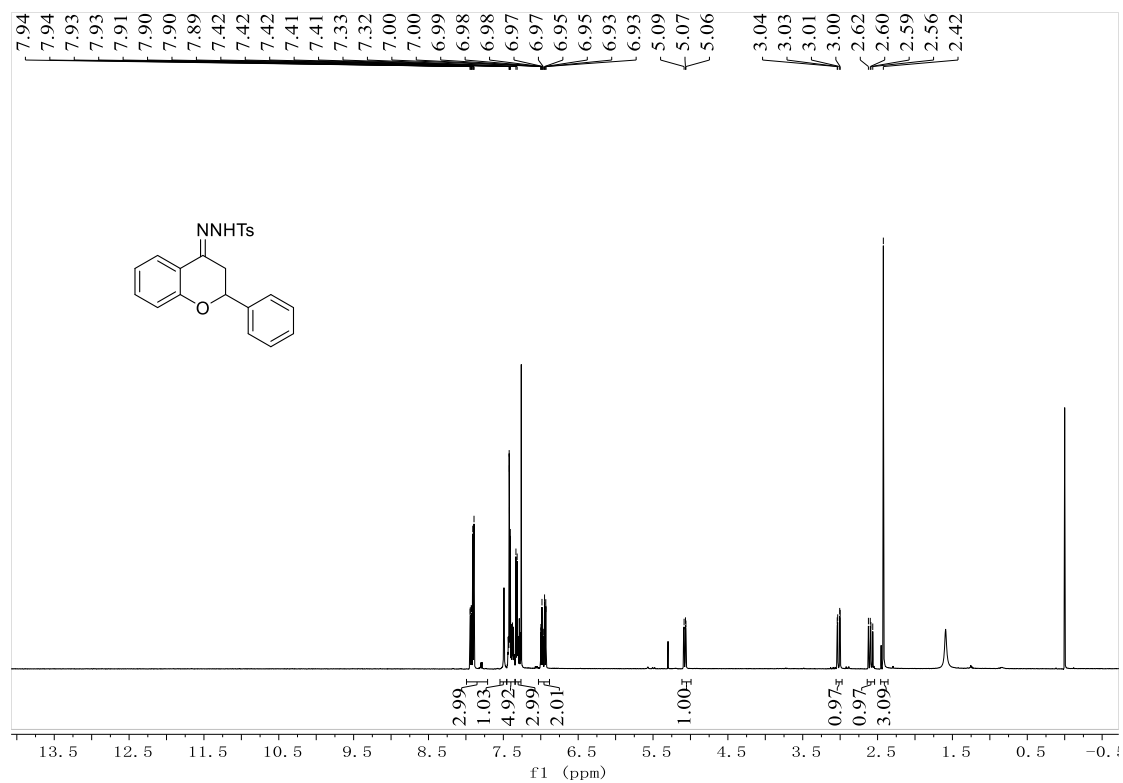

**<sup>1</sup>H NMR (500 MHz, CDCl<sub>3</sub>) spectra for 89b:**

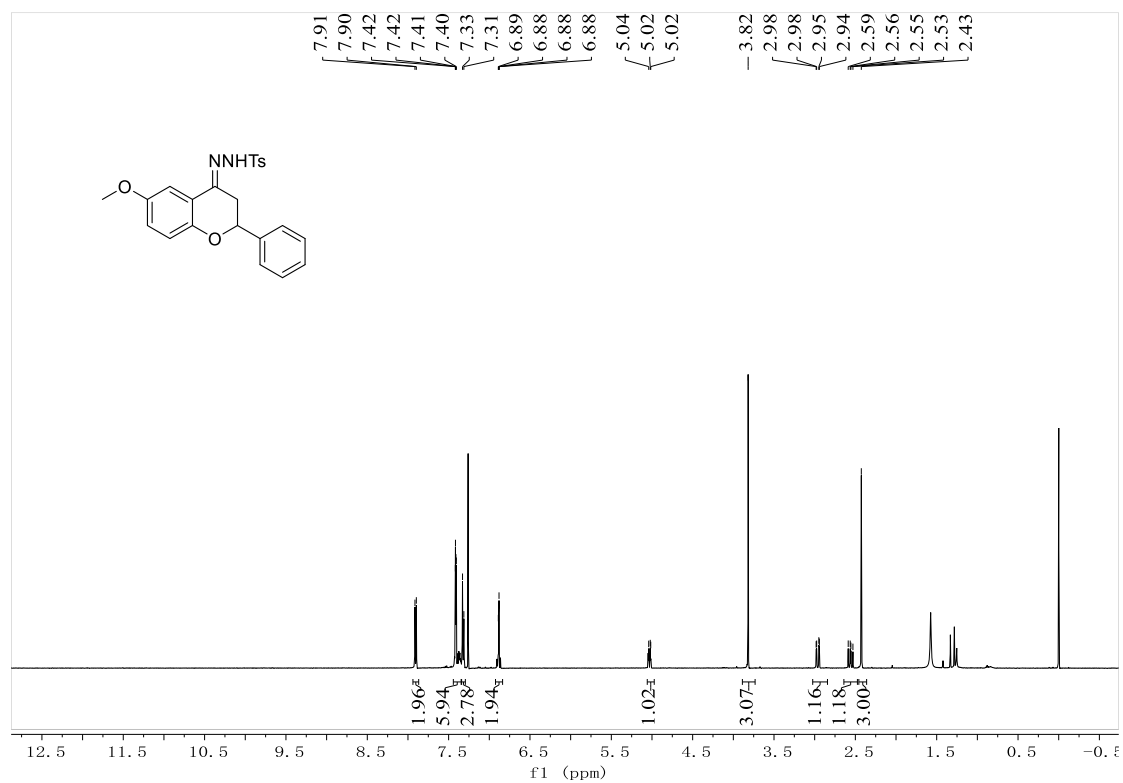

**<sup>1</sup>H NMR (500 MHz, CDCl<sub>3</sub>) and <sup>13</sup>C NMR (126 MHz, CDCl<sub>3</sub>) spectra for 90b:**

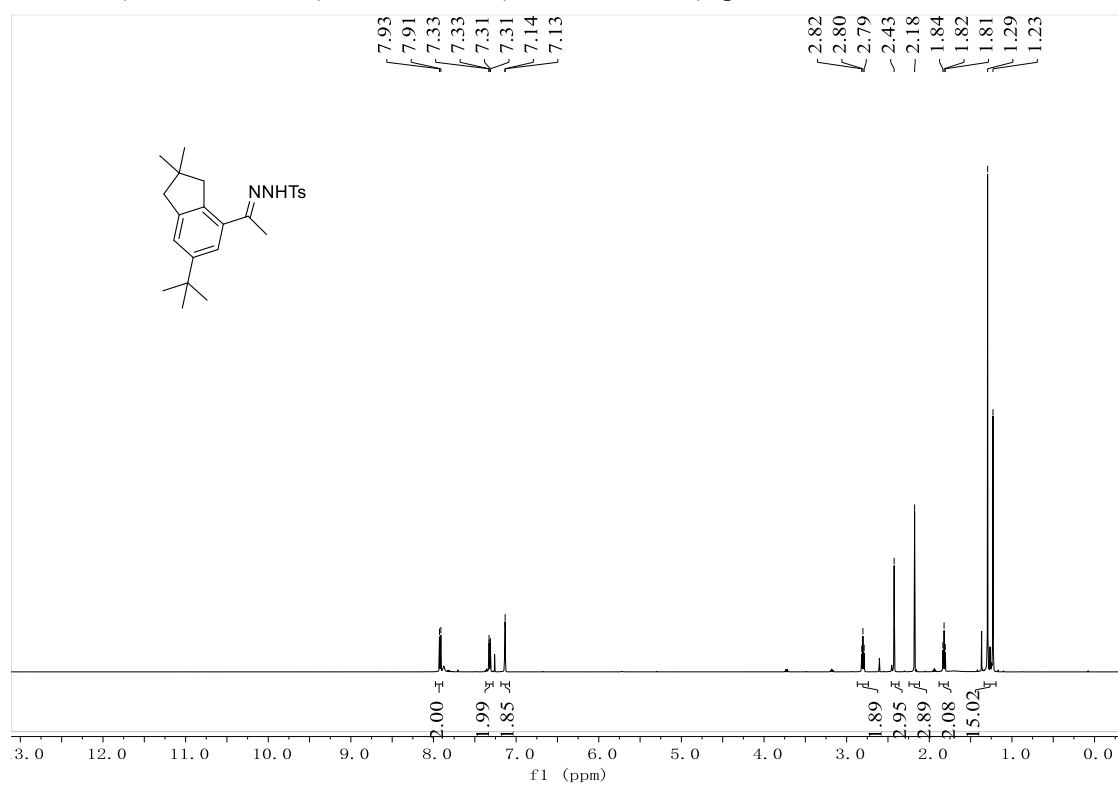

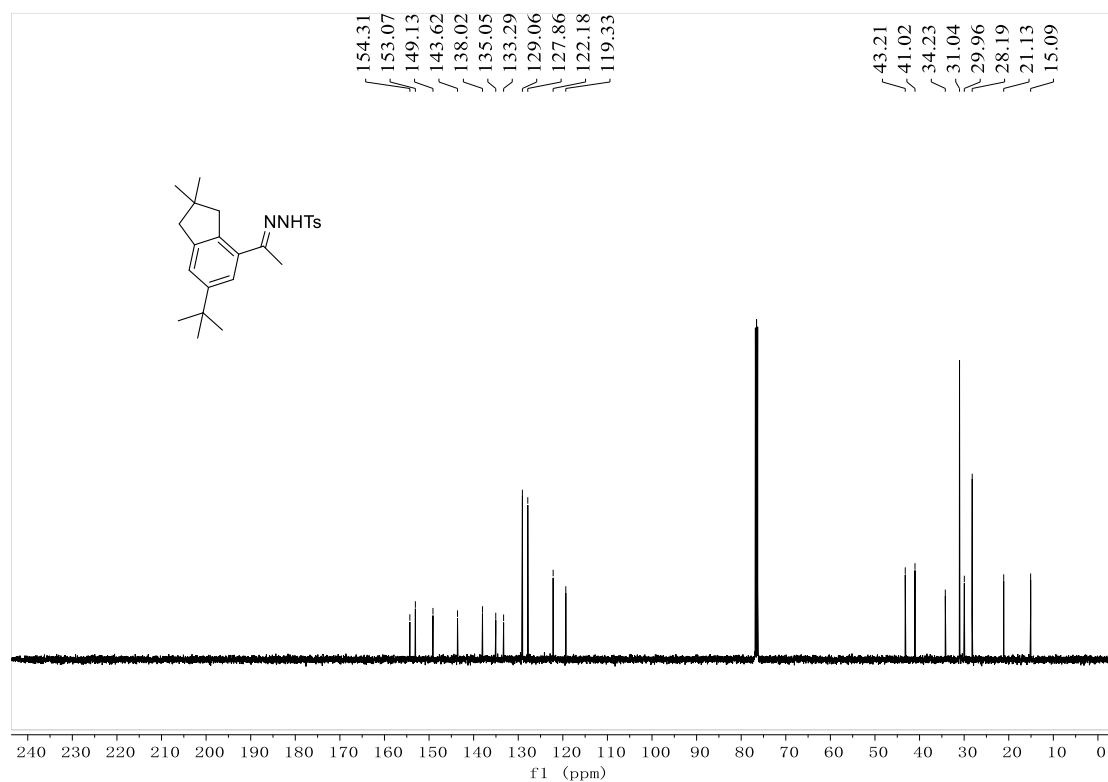

**<sup>1</sup>H NMR (500 MHz, CDCl<sub>3</sub>) spectra for 9**1b**:**

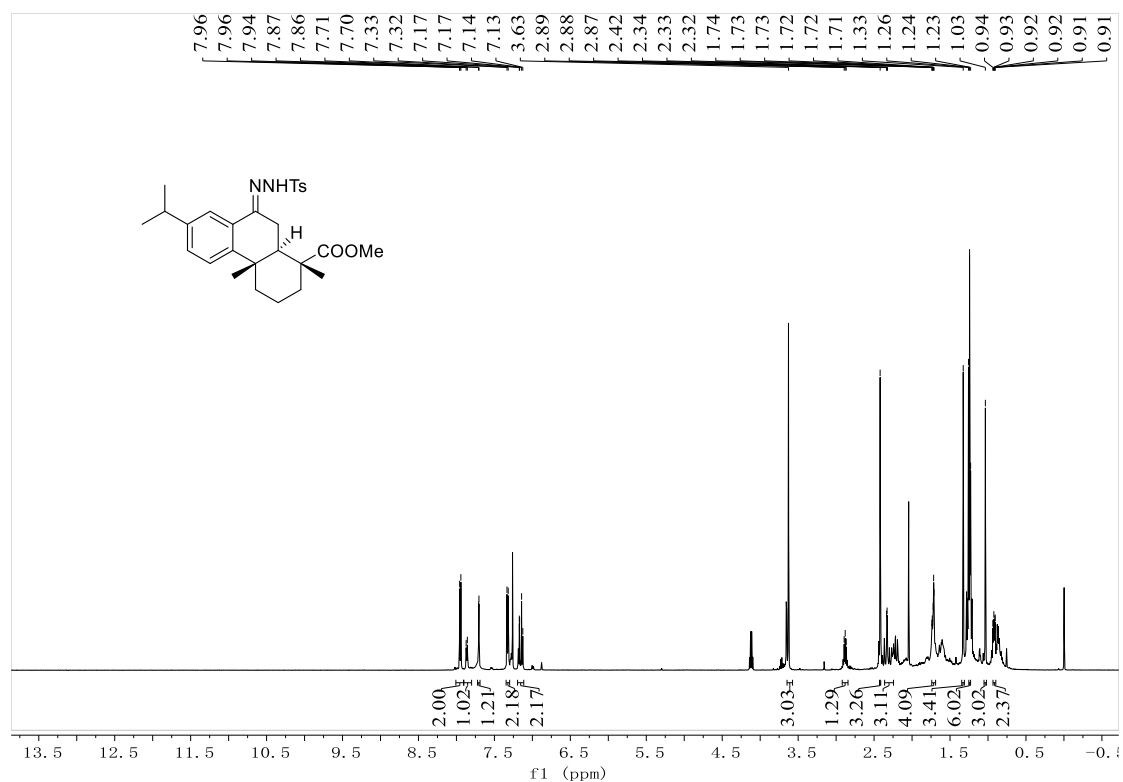

**<sup>1</sup>H NMR (500 MHz, CDCl<sub>3</sub>) and <sup>13</sup>C NMR (126 MHz, CDCl<sub>3</sub>) spectra for 92b:**

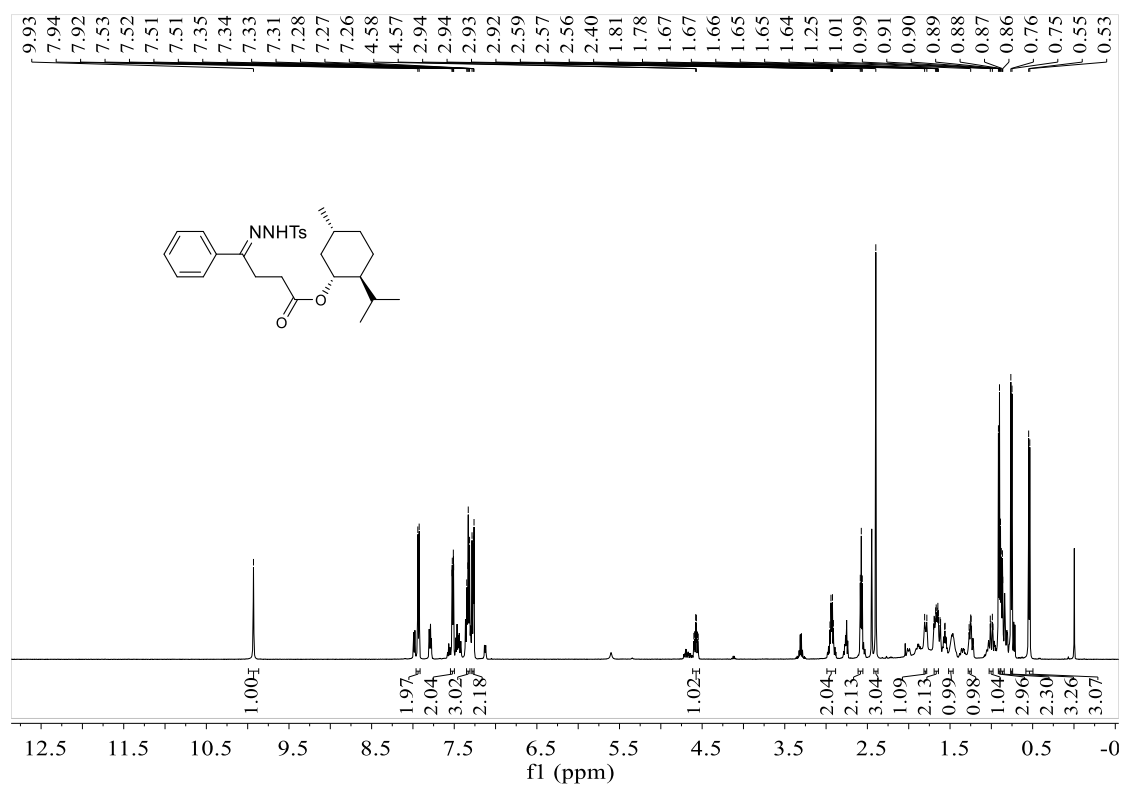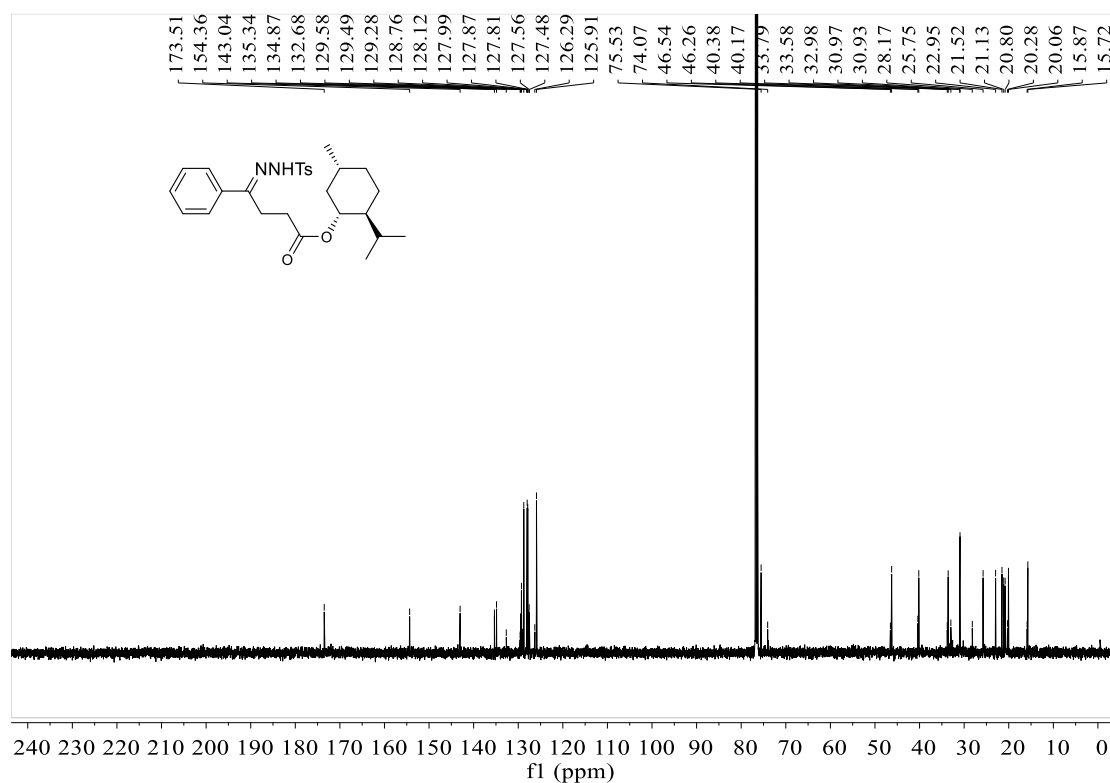



**<sup>1</sup>H NMR (500 MHz, CDCl<sub>3</sub>) spectra for **55e**:**

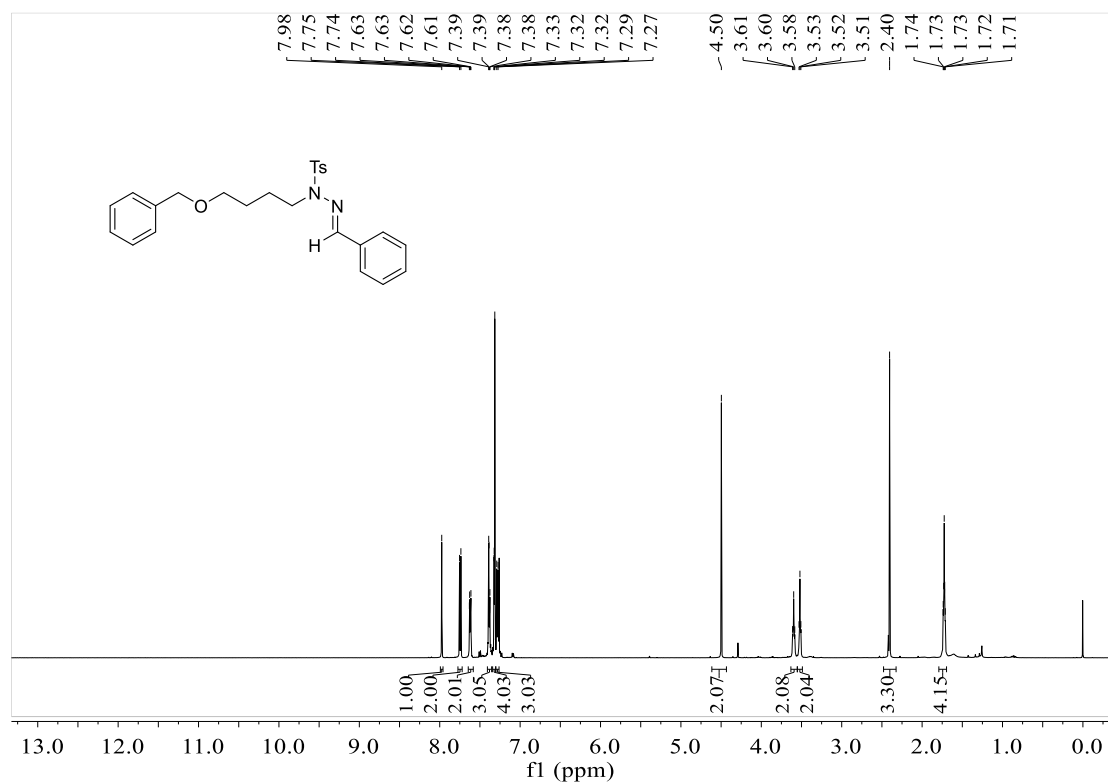

**<sup>13</sup>C NMR (126 MHz, CDCl<sub>3</sub>) spectra for **55e**:**

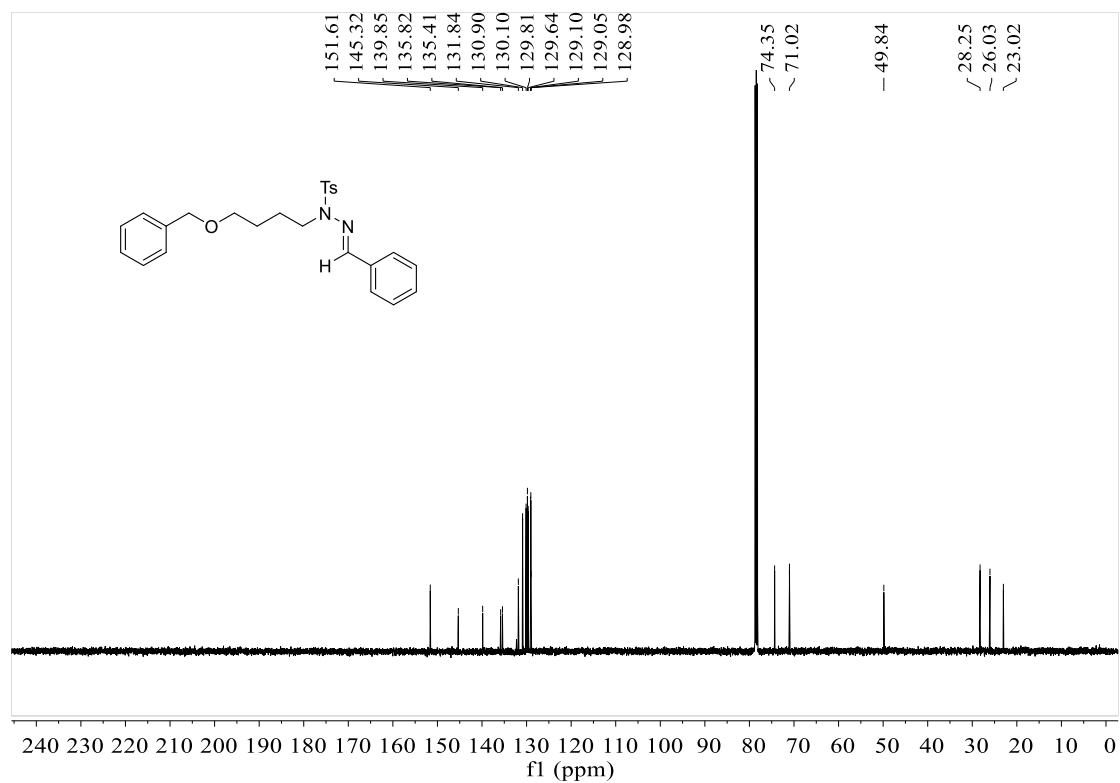

$^1\text{H}$   $^1\text{H}$  COSY ( $\text{CDCl}_3$ ) spectra for **55e**:

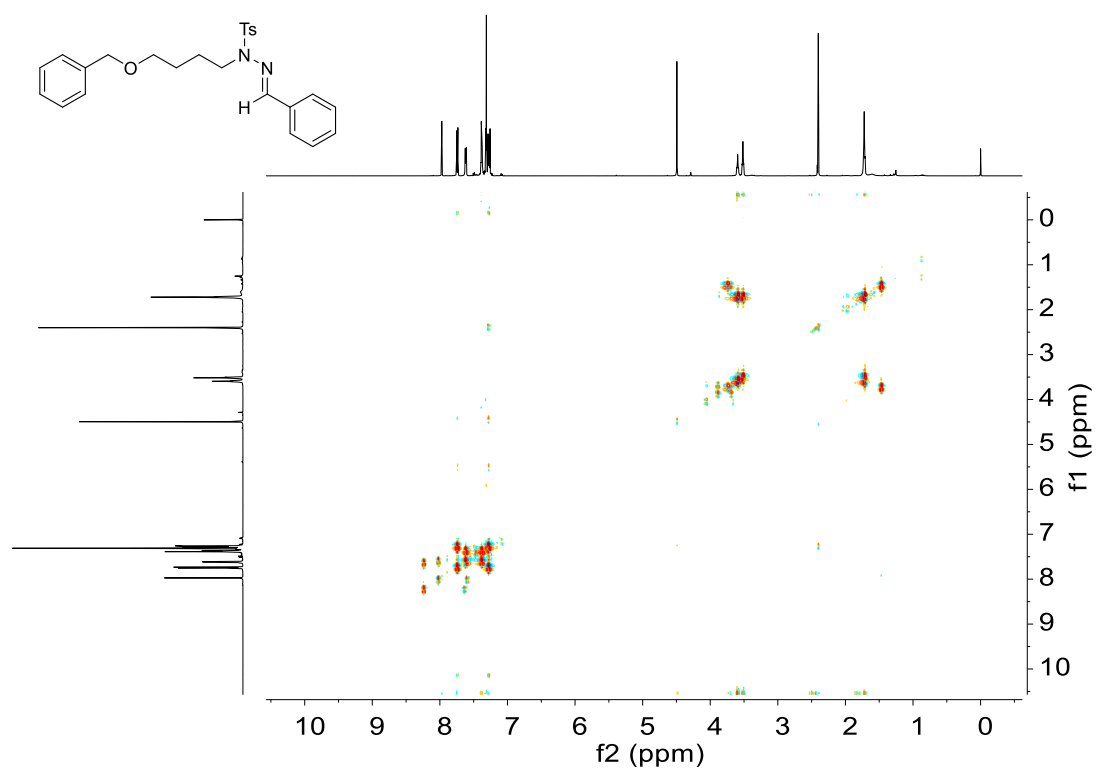

HSQC ( $\text{CDCl}_3$ ) spectra for **55e**:

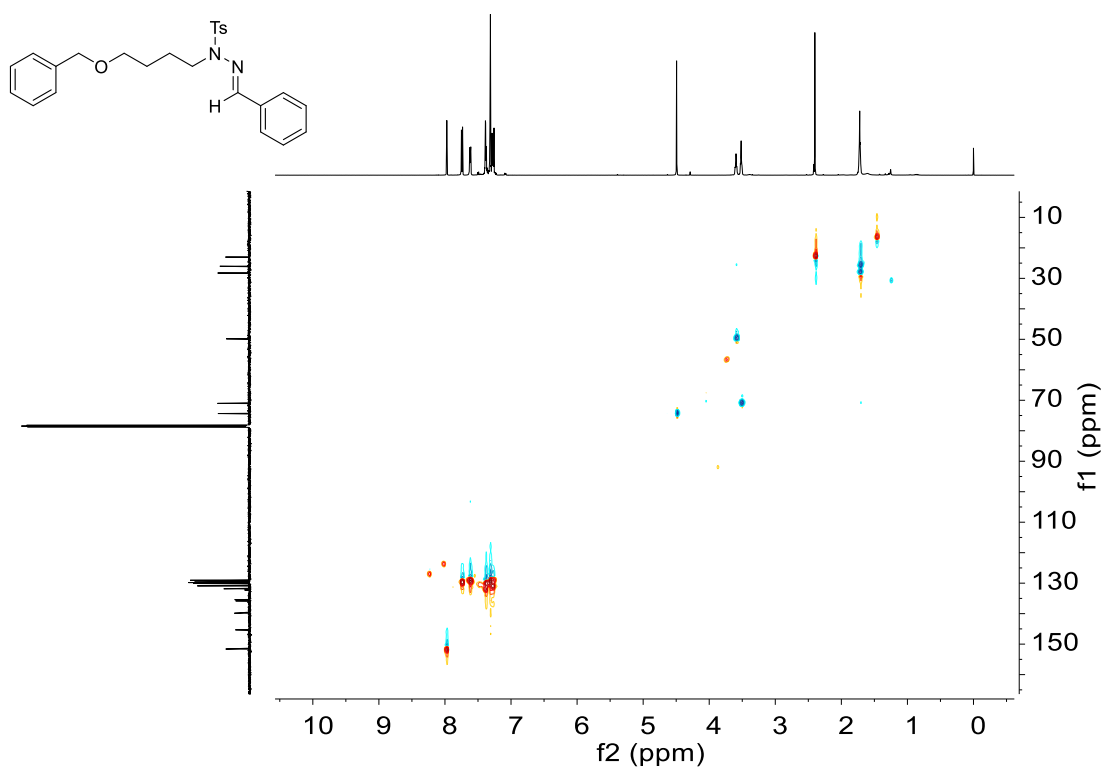

HMBC (CDCl<sub>3</sub>) spectra for **55e**:

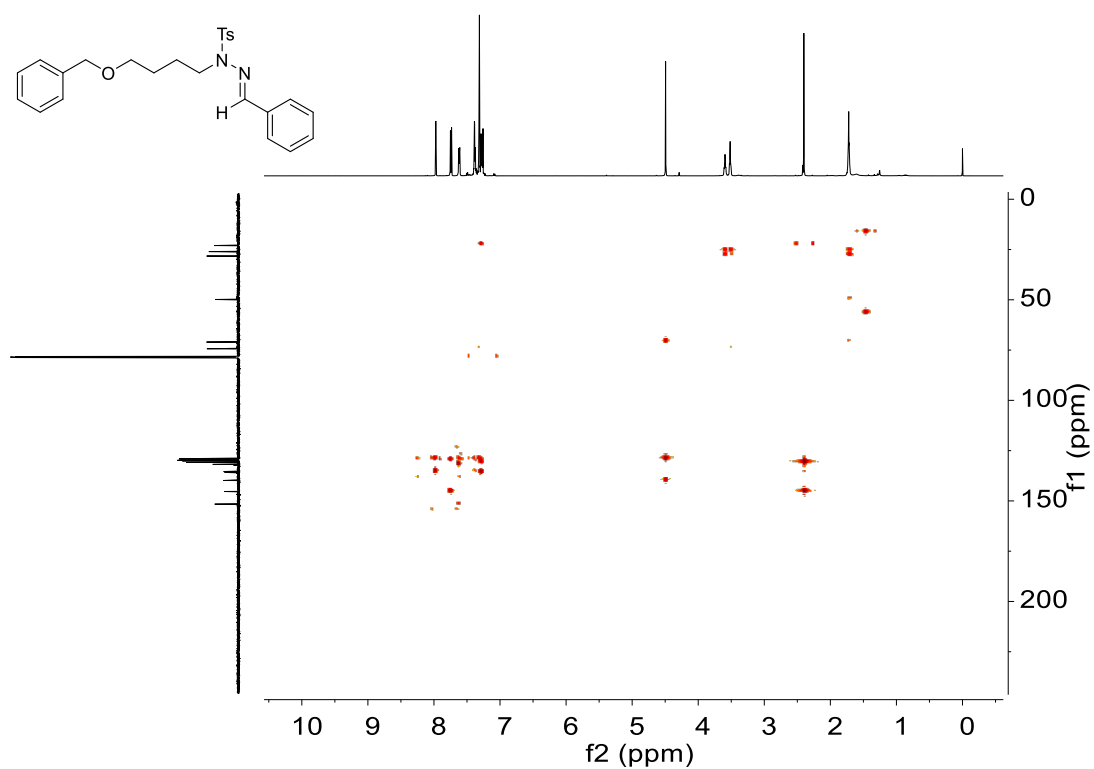

<sup>1</sup>H NMR (500 MHz, DMSO-*d*<sub>6</sub>) spectra for **22e**:

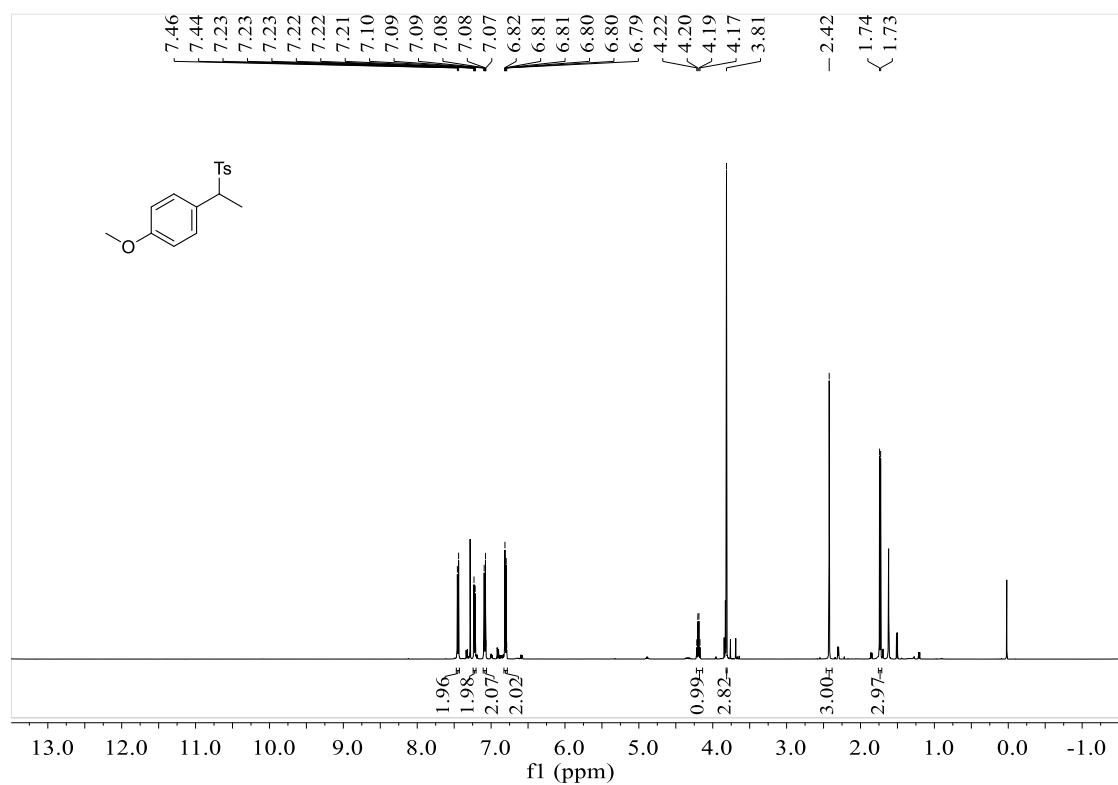

<sup>1</sup>H NMR (500 MHz, DMSO-*d*<sub>6</sub>) spectra for **1e**:

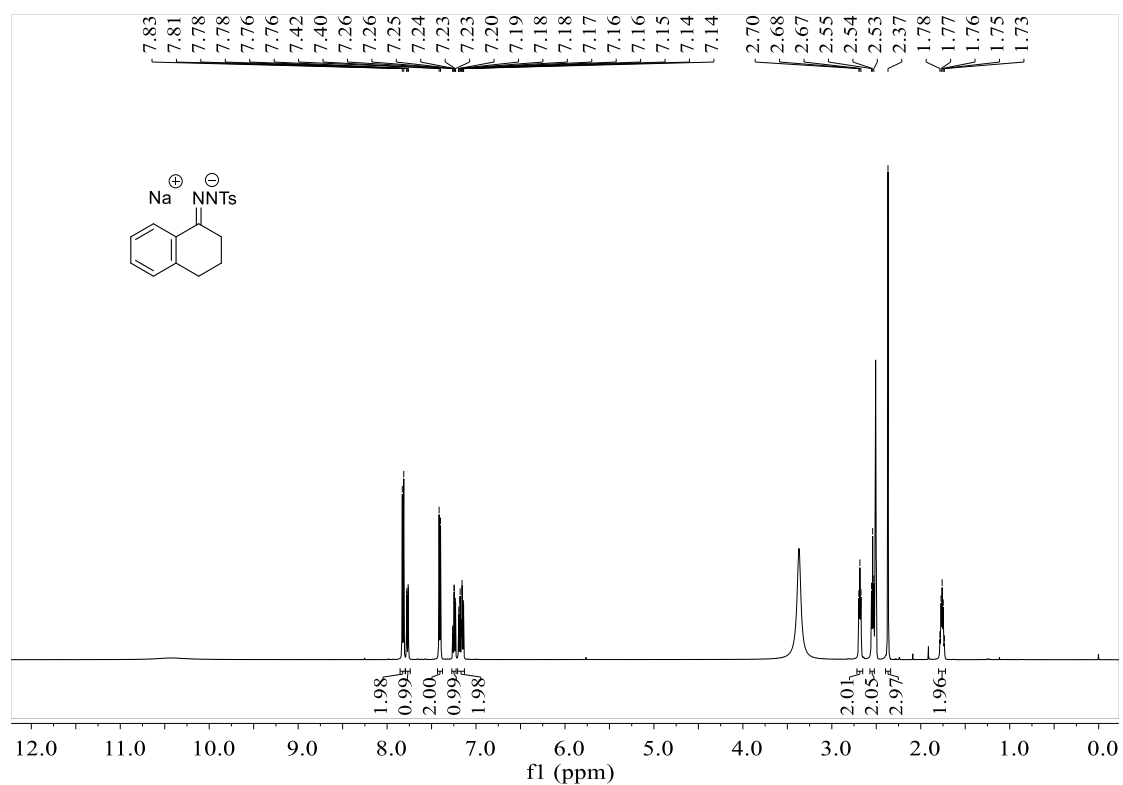

<sup>1</sup>H NMR (500 MHz, DMSO-*d*<sub>6</sub>) spectra for **101e**:

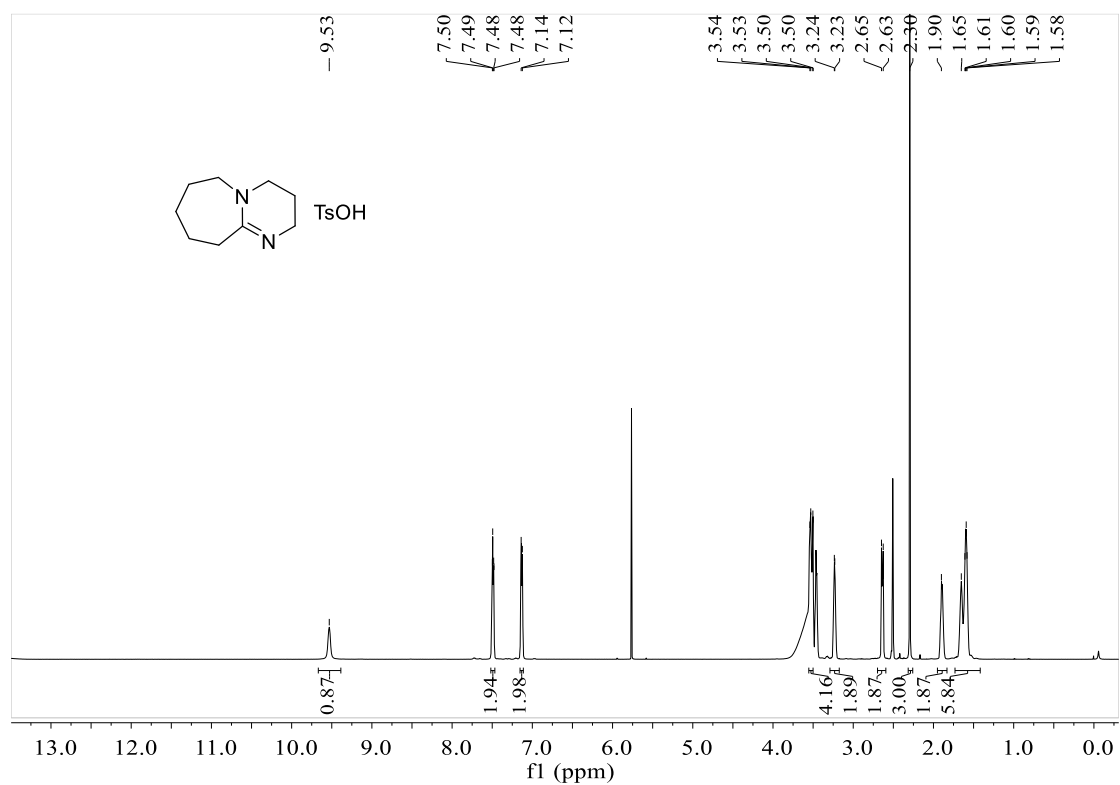

<sup>1</sup>H NMR (500 MHz, DMSO-*d*<sub>6</sub>) spectra for **101f**:

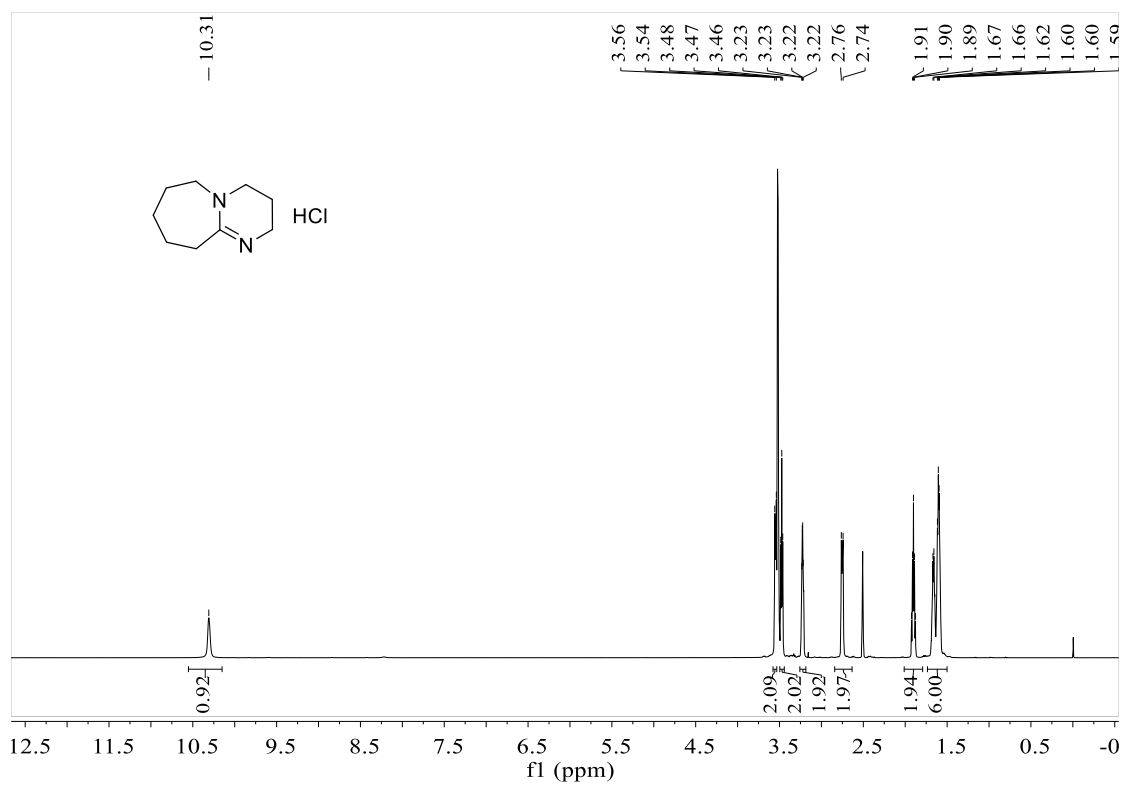

Supplement: d3sc04188c1.pdf [file d3sc04188c1.pdf]
